# Supplementary material for: Proneural and mesenchymal glioma stem cells display major differences in splicing and lncRNA profiles
Source: PubMed Central journal article supplement (PMC6965107; doi:10.1038/s41525-019-0108-5), 2020-01-16
Supplement: 41525_2019_108_MOESM1_ESM.pdf [file 41525_2019_108_MOESM1_ESM.pdf]

## SUPPLEMENTARY INFORMATION

### Proneural and Mesenchymal glioma stem cells display major differences in splicing and lncRNA profiles

Gabriela D.A. Guardia<sup>1</sup>, Bruna R. Correa<sup>1,2</sup>, Patricia Rosa Araujo<sup>3</sup>, Mei Qiao<sup>3</sup>, Suzanne Burns<sup>3</sup>, Luiz O. F. Penalva<sup>3,4\*</sup>, Pedro A.F. Galante<sup>1\*</sup>

1. Centro de Oncologia Molecular, Hospital Sírio-Libanês, São Paulo, São Paulo, 01309-060, Brazil
2. Current affiliation: Centre for Genomic Regulation (CRG), The Barcelona Institute of Science and Technology, Barcelona 08003, Catalonia, Spain
3. Children's Cancer Research Institute, UT Health San Antonio, San Antonio, Texas, 78229, USA
4. Department of Cell Systems and Anatomy, UT Health San Antonio, San Antonio, Texas, 78229, USA

\*Corresponding authors: [penalva@uthscsa.edu](mailto:penalva@uthscsa.edu) (L.O.F. P.), [pgalante@mochsl.org.br](mailto:pgalante@mochsl.org.br) (P.A.F.G.)

### Supplementary Figures

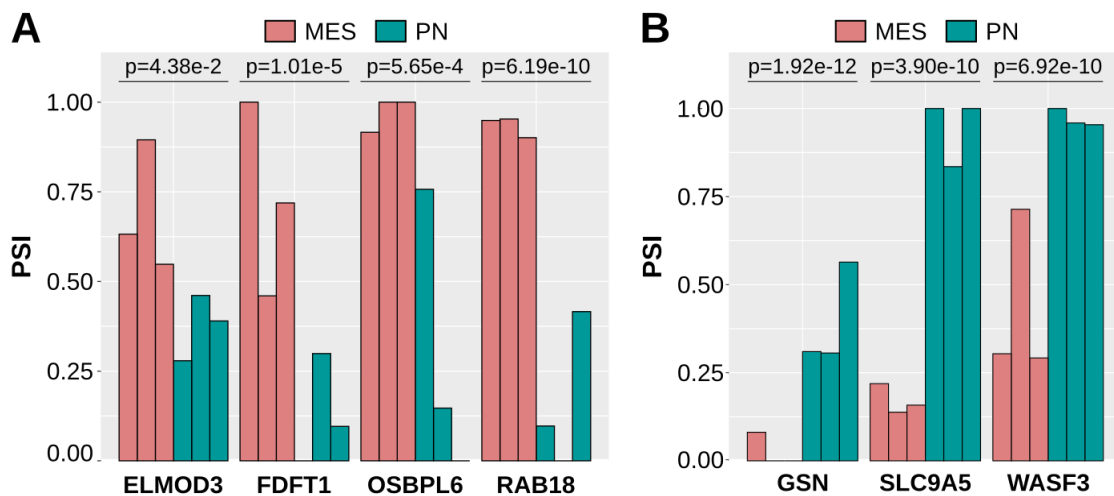

**Supplementary Figure 1.** RNA-Seq inclusion levels (PSI values) of (A) proneural GSCs and (B) mesenchymal GSCs exon skipping events further validated by qRT-PCR (Mann-Whitney Wilcoxon p-values).

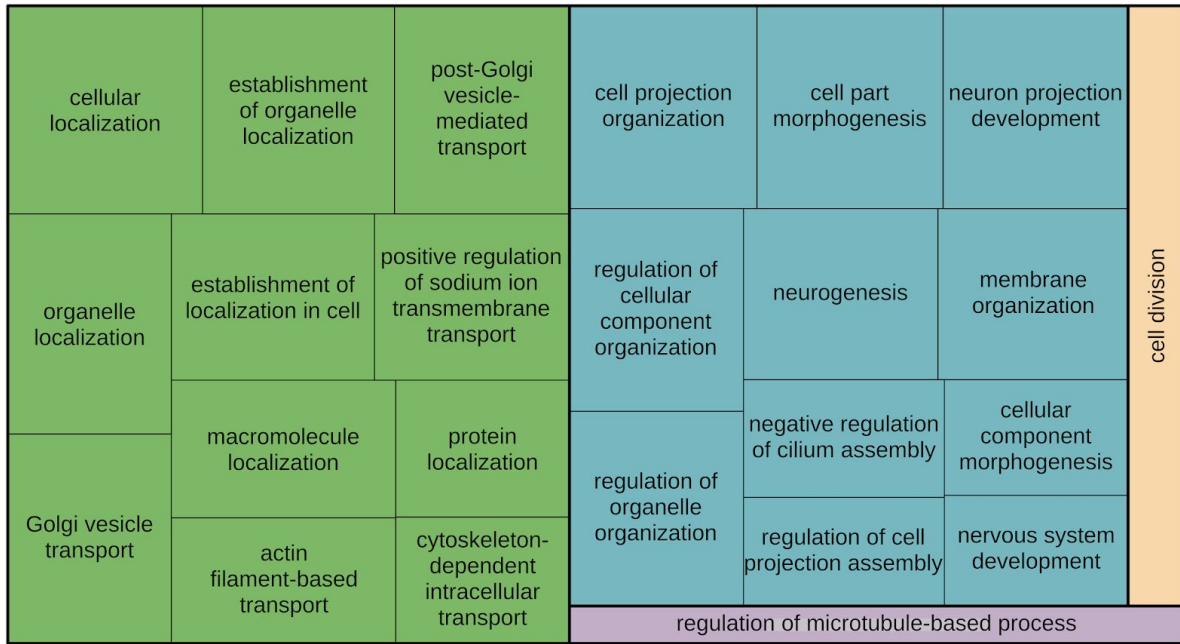

**Supplementary Figure 2.** Treemap of Gene ontology enriched processes for protein coding genes sharing AS events in proneural GSC and GBM versus mesenchymal GSC and GBM, respectively.

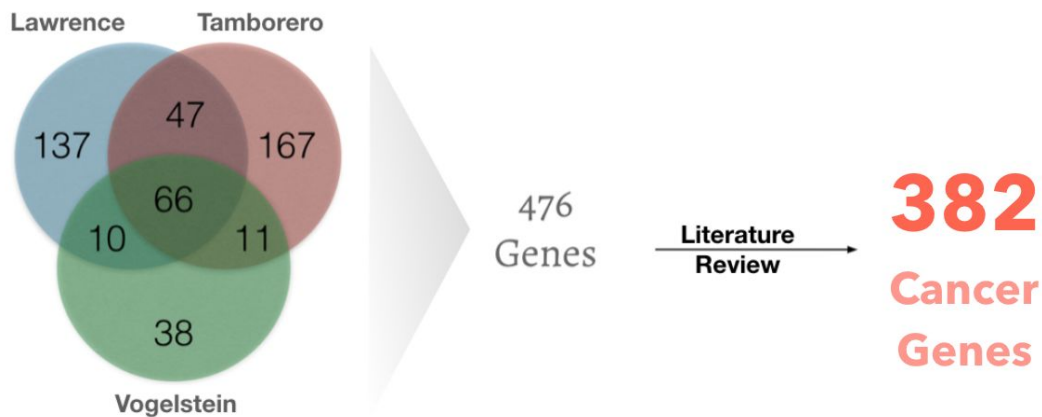

**Supplementary Figure 3. Cancer genes.** The set of cancer genes was defined using genes related to cancer presented in <sup>1</sup>, <sup>2</sup> and <sup>3</sup>. We conducted a literature review for all genes and kept only those genes already described as cancer-related in at least one publication).

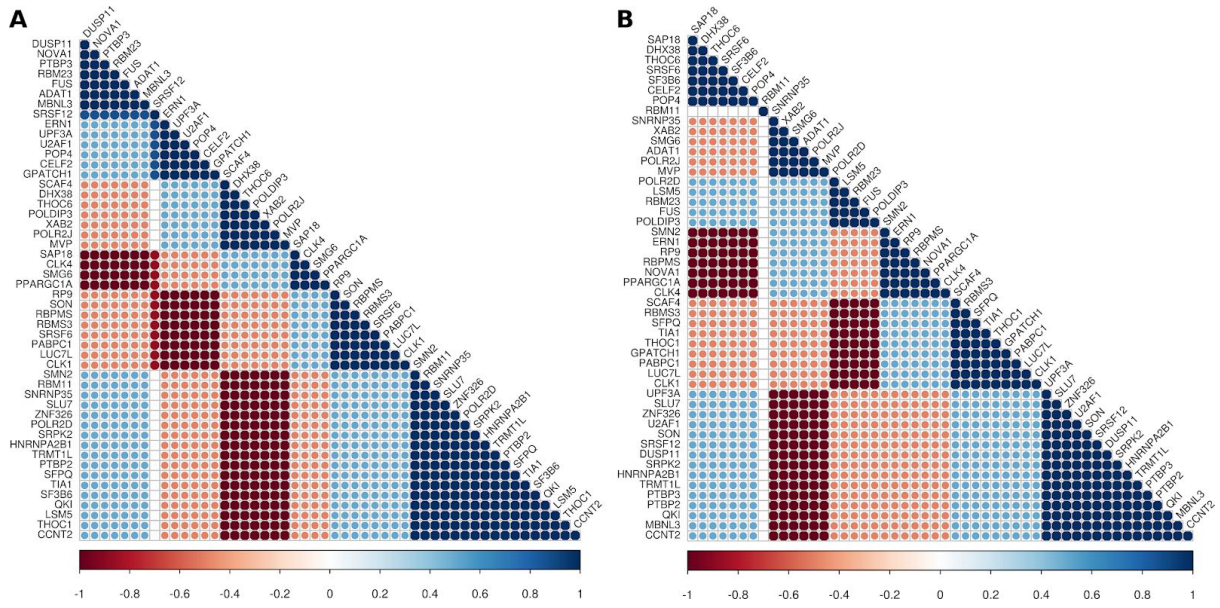

**Supplementary Figure 4:** Correlations among differentially expressed RBPs in A) mesenchymal GSCs; and B) proneural GSCs.

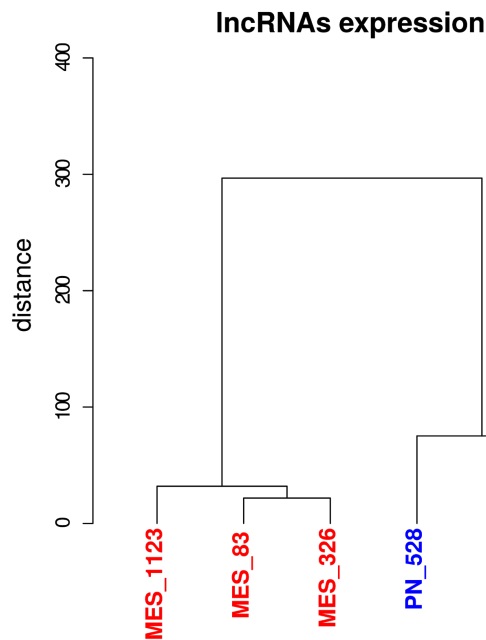

**Supplementary Figure 5:** Unsupervised hierarchical clustering of GSC samples based on expression levels of differentially expressed long non-coding RNAs (lncRNAs).

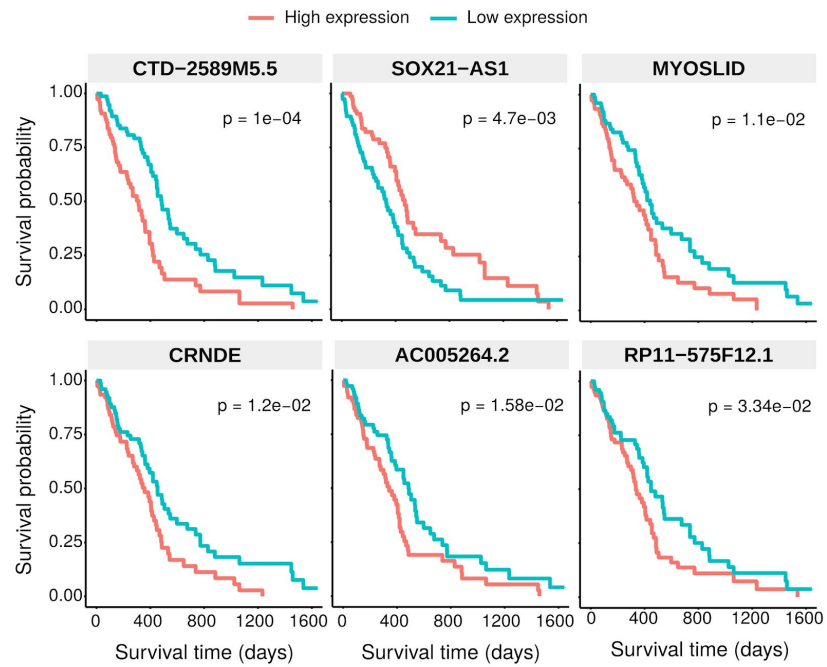

**Supplementary Figure 6:** Kaplan-Meier survival plots of differentially expressed lncRNAs significantly correlated with prognosis in GBM ( $p < 0.05$ , univariate Cox proportional-hazards regression).

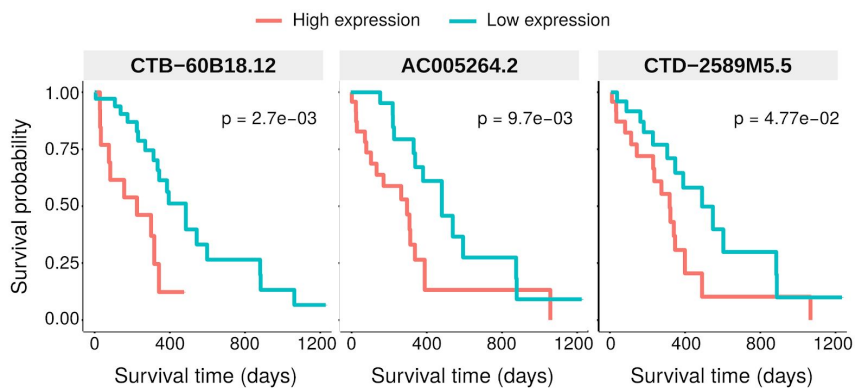

**Supplementary Figure 7:** Kaplan-Meier survival plots of differentially expressed lncRNAs significantly associated with prognosis in mesenchymal GBM ( $p < 0.05$ , univariate Cox proportional-hazards regression).

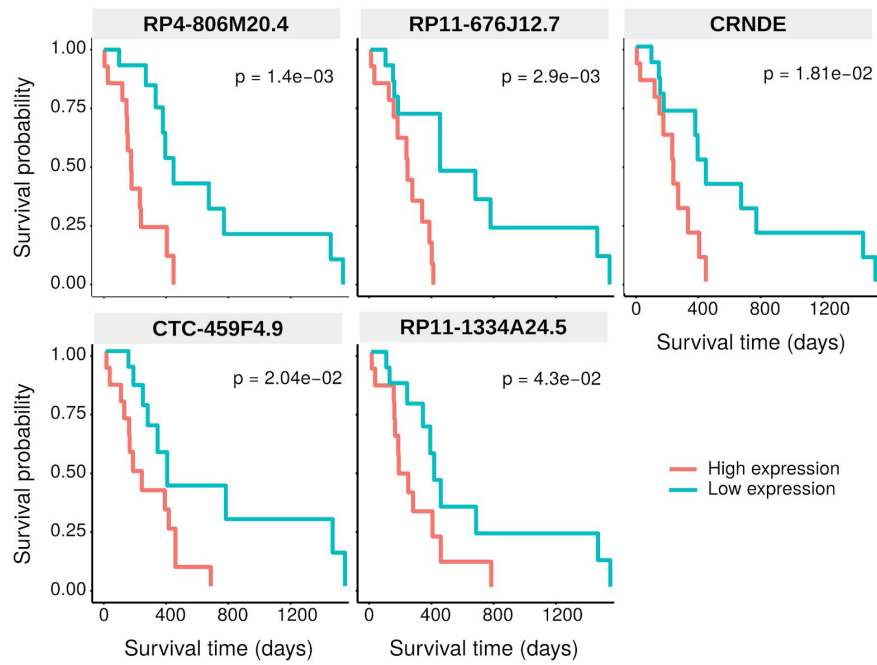

**Supplementary Figure 8:** Kaplan-Meier survival plots of differentially expressed lncRNAs significantly associated with prognosis in proneural GBM ( $p < 0.05$ , univariate Cox proportional-hazards regression).

## Supplementary Tables

**Supplementary Table 1:** Sequenced and reliable mapped reads per GSC sample.

| sample          | sequenced.reads | mapped.reads (>q20) | %mapped.reads (>q20) |
|-----------------|-----------------|---------------------|----------------------|
| <b>MES-83</b>   | 58,688,002      | 53,958,742          | 91.94                |
| <b>MES-326</b>  | 61,481,484      | 56,192,789          | 91.40                |
| <b>MES-1123</b> | 61,517,920      | 52,705,388          | 85.67                |
| <b>PRO-19</b>   | 69,594,474      | 66,841,359          | 96.04                |
| <b>PRO-157</b>  | 62,056,008      | 59,633,152          | 96.10                |
| <b>PRO-528</b>  | 58,363,862      | 55,228,567          | 94.63                |







Table with 5 columns: Gene Name, Strand, Chr, Start, End. Lists various genes and their genomic coordinates across chromosomes 7 to 19.























Table with 4 columns: Gene Symbol, Chromosome, Position (kb), and Gene Name. The table lists various genes and their genomic coordinates across multiple chromosomes (1-22, X, Y).

















|    |         |   |                           |    |       |               |
|----|---------|---|---------------------------|----|-------|---------------|
| SE | KLHDC1  | + | chr14:49728925-49729009   | NA | 0.363 | 0.04492330258 |
| SE | TMEM143 | - | chr19:48360071-48360176   | NA | 0.29  | 0.04513725149 |
| SE | ACIN1   | - | chr14:23071124-23071186   | NA | 0.194 | 0.04533534914 |
| SE | CDKL3   | - | chr5:134359896-134360091  | NA | 0.385 | 0.04552554741 |
| SE | DOCK9   | - | chr13:98825871-98825940   | NA | 0.149 | 0.04570926204 |
| SE | SMUG1   | - | chr12:54188514-54188596   | NA | 0.17  | 0.0459673085  |
| SE | TCF20   | - | chr22:42168608-42168736   | NA | 0.28  | 0.04608462819 |
| SE | TFIP11  | - | chr22:26511118-26511195   | NA | 0.144 | 0.04611867135 |
| SE | DNM1    | + | chr9:128240986-128241047  | NA | 0.22  | 0.04612861764 |
| SE | DCTD    | - | chr4:182916418-182916539  | NA | 0.153 | 0.0464612947  |
| SE | RCN1    | + | chr11:32103003-32103202   | NA | 0.332 | 0.04655359236 |
| SE | PORCN   | + | chrX:48512834-48512852    | NA | 0.154 | 0.04729117939 |
| SE | SDCCAG3 | - | chr9:136408998-136409067  | NA | 0.183 | 0.0474914878  |
| SE | WARS    | - | chr14:100375282-100375406 | NA | 0.185 | 0.04751030201 |
| SE | PAQR3   | - | chr4:78922140-78922421    | NA | 0.317 | 0.04751030201 |
| SE | TMEM267 | - | chr5:43479889-43479987    | NA | 0.131 | 0.04751393873 |
| SE | NFIC    | + | chr19:3456549-3456635     | NA | 0.109 | 0.04788326124 |
| SE | HPS4    | - | chr22:28466050-28466104   | NA | 0.314 | 0.04795517943 |
| SE | ABCD4   | - | chr14:74300149-74300268   | NA | 0.157 | 0.04822228261 |
| SE | RCHY1   | - | chr4:75491582-75491637    | NA | 0.129 | 0.04831464141 |
| SE | SNX21   | + | chr20:45840447-45840458   | NA | 0.535 | 0.04920193968 |
| SE | ZFAND1  | - | chr8:81717248-81717288    | NA | 0.224 | 0.04922594537 |
| SE | CTNND1  | + | chr11:57794009-57794081   | NA | 0.138 | 0.04953027008 |
| SE | ZNF133  | + | chr20:18297984-18298062   | NA | 0.116 | 0.04998063542 |

VPS53  
 VPS54  
 VPS8  
 VPS9D1  
 VRK3  
 VTI1B  
 WAC-AS1  
 WARS  
 WASF1  
 WASF3  
 WASH2P  
 WASHC2A  
 WASHC2C  
 WBP1  
 WBSR22  
 WDFY3  
 WDCPC  
 WDR20  
 WDR24  
 WDR26  
 WDR27  
 WDR31  
 WDR35  
 WDR4  
 WDR45  
 WDR46  
 WDR54  
 WDR55  
 WDR6  
 WDR83  
 WDR89  
 WDR90  
 WEE2-AS1  
 WHAMM  
 WIPF1  
 WIPI1  
 WIPI2  
 WNK1  
 WRAP73  
 WSB1  
 WWF2  
 XIAP  
 XKR9  
 XPNPEP1  
 XPNPEP3  
 XPO1  
 XPO6  
 XRCC3  
 XRN1  
 XRR1  
 YAF2  
 YAP1  
 YBX3  
 YDJC  
 YEATS4  
 YIPF1  
 YLPM1  
 YPEL5  
 YWHAZ  
 YY1AP1  
 ZBED3-AS1  
 ZBED5-AS1  
 ZBTB1  
 ZBTB14  
 ZBTB17  
 ZBTB21  
 ZBTB24  
 ZBTB25  
 ZBTB38  
 ZBTB43  
 ZBTB80S  
 ZC2HC1A  
 ZC3H11A  
 ZC3H13  
 ZC3H14  
 ZC3H18  
 ZC3H7B  
 ZC3HAV1  
 ZCCHC11  
 ZCCHC8  
 ZCWPW1  
 ZCWPW2  
 ZDHHHC15  
 ZDHHHC16  
 ZDHHHC17  
 ZDHHHC24  
 ZDHHHC4  
 ZDHHHC6  
 ZEB1  
 ZFAND1  
 ZFAND2A  
 ZFAND5  
 ZFAND6  
 ZFAS1  
 ZFX  
 ZFYVE19  
 ZFYVE21  
 ZFYVE27  
 ZGRF1  
 ZHX3  
 ZKSCAN3  
 ZMAT1  
 ZMIZ1  
 ZMYM1  
 ZMYM5  
 ZMYND8  
 ZNF10  
 ZNF107  
 ZNF133  
 ZNF140  
 ZNF141  
 ZNF142  
 ZNF155  
 ZNF180  
 ZNF189  
 ZNF19  
 ZNF195  
 ZNF2  
 ZNF202  
 ZNF211  
 ZNF226

ZNF232  
ZNF253  
ZNF254  
ZNF260  
ZNF267  
ZNF271P  
ZNF277  
ZNF283  
ZNF286A  
ZNF3  
ZNF30  
ZNF302  
ZNF317  
ZNF326  
ZNF33B  
ZNF341  
ZNF343  
ZNF37BP  
ZNF383  
ZNF384  
ZNF391  
ZNF419  
ZNF440  
ZNF444  
ZNF468  
ZNF480  
ZNF484  
ZNF485  
ZNF506  
ZNF507  
ZNF517  
ZNF519  
ZNF551  
ZNF559  
ZNF559-ZNF177  
ZNF561  
ZNF561-AS1  
ZNF562  
ZNF569  
ZNF571  
ZNF582-AS1  
ZNF584  
ZNF592  
ZNF596  
ZNF605  
ZNF611  
ZNF615  
ZNF619  
ZNF625-ZNF20  
ZNF641  
ZNF654  
ZNF655  
ZNF664  
ZNF667-AS1  
ZNF678  
ZNF680  
ZNF684  
ZNF692  
ZNF7  
ZNF706  
ZNF711  
ZNF740  
ZNF75A  
ZNF75D  
ZNF76  
ZNF761  
ZNF772  
ZNF778  
ZNF786  
ZNF789  
ZNF814  
ZNF815P  
ZNF821  
ZNF83  
ZNF90  
ZNRD1ASP  
ZNRANB2-AS2  
ZNRANB3  
ZSCAN23  
ZSCAN26  
ZSCAN31  
ZSCAN32  
ZSCAN5A  
ZSWIM7  
ZSWIM8  
ZUFSP  
ZWINT

**Supplementary Table 3:** Exon skipping events in mesenchymal (MES) and proneural GSC samples from which events were randomly selected for PCR validations. Validated events are highlighted in blue.

| Exon skipping events in MES GSCs |          |                |  |
|----------------------------------|----------|----------------|--|
| geneSymbol                       | deltaPSI | FDR            |  |
| WBP1                             | 0.968    | 1.34E-13       |  |
| SLC27A5                          | 0.897    | 3.04E-05       |  |
| ANKRD36                          | 0.886    | 2.93E-08       |  |
| XPNPEP3                          | 0.881    | 5.32E-13       |  |
| PCTP                             | 0.874    | 0              |  |
| ADGRG6                           | 0.871    | 0              |  |
| ARIH2                            | 0.852    | 0              |  |
| ZNF667-AS1                       | 0.819    | 1.32E-10       |  |
| TCF7L2                           | 0.805    | 0.000153796721 |  |
| FRG1BP                           | 0.796    | 0              |  |
| CCDC18-AS1                       | 0.794    | 6.70E-06       |  |
| TCAF1                            | 0.792    | 1.72E-09       |  |
| TWF1                             | 0.789    | 4.38E-08       |  |
| RP11-849H4.2                     | 0.787    | 4.30E-07       |  |
| EMC3-AS1                         | 0.782    | 3.23E-08       |  |
| HKR1                             | 0.782    | 7.85E-07       |  |
| LPP                              | 0.778    | 1.83E-09       |  |
| NRG2                             | 0.776    | 0.000300464970 |  |
| RAB18                            | 0.763    | 6.19E-10       |  |
| LINC02210                        | 0.754    | 3.26E-07       |  |
| C2orf74                          | 0.743    | 1.09E-09       |  |
| IST1                             | 0.742    | 0.000233405659 |  |
| DUSP18                           | 0.738    | 1.14E-10       |  |
| SERHL2                           | 0.73     | 1.31E-09       |  |
| SEPT2                            | 0.718    | 0              |  |
| HKR1                             | 0.712    | 1.03E-06       |  |
| APBB2                            | 0.711    | 0              |  |
| KIF13A                           | 0.706    | 0              |  |
| SPAST                            | 0.697    | 5.59E-14       |  |
| ADD3                             | 0.694    | 0              |  |
| FKTN                             | 0.692    | 0              |  |
| EHBP1                            | 0.692    | 0              |  |
| C2CD5                            | 0.69     | 9.33E-06       |  |
| FNTB                             | 0.679    | 5.36E-09       |  |
| APITD1-CORT                      | 0.673    | 0.001998768924 |  |
| OSBPL6                           | 0.671    | 0.000564656959 |  |
| PLA2G12A                         | 0.67     | 7.20E-06       |  |
| RGMB-AS1                         | 0.667    | 2.10E-07       |  |
| SLTM                             | 0.667    | 1.22E-05       |  |
| C14orf93                         | 0.667    | 3.29E-05       |  |
| RP13-968A2.1                     | 0.667    | 0.000406792612 |  |
| RP11-1228E12.1                   | 0.667    | 0.001952422279 |  |
| DYRK4                            | 0.667    | 0.002780083212 |  |
| ACACA                            | 0.667    | 0.003589770542 |  |

| Exon skipping events in PN GSCs |          |                |          |
|---------------------------------|----------|----------------|----------|
| geneSymbol                      | deltaPSI | FDR            |          |
| ST20                            |          | 1              | 0        |
| SEPT9                           |          | 1              | 0        |
| ARIH2                           |          | 1              | 0        |
| PUDP                            |          | 1              | 0        |
| PUDP                            |          | 1              | 0        |
| PUDP                            |          | 1              | 9.24E-13 |
| TTC13                           | 0.993    | 0              |          |
| PIP5K1C                         | 0.96     | 3.34E-13       |          |
| SORBS1                          | 0.934    | 3.34E-13       |          |
| USP3-AS1                        | 0.925    | 4.00E-12       |          |
| CLIP1                           | 0.924    | 2.89E-14       |          |
| ANKAR                           | 0.91     | 1.34E-13       |          |
| SRGAP1                          | 0.904    | 2.23E-09       |          |
| TVP23C-CDRT4                    | 0.897    | 0              |          |
| BTN3A3                          | 0.881    | 5.48E-12       |          |
| RPS24                           | 0.876    | 0              |          |
| BTN3A3                          | 0.872    | 0              |          |
| ANKRD36                         | 0.869    | 1.65E-11       |          |
| RP4-798P15.3                    | 0.86     | 9.70E-11       |          |
| SYTL2                           | 0.857    | 0              |          |
| PCBP1-AS1                       | 0.84     | 2.34E-11       |          |
| ZNF83                           | 0.838    | 6.02E-06       |          |
| GSN                             | 0.835    | 3.15E-06       |          |
| DST                             | 0.827    | 0              |          |
| RAPGEF2                         | 0.824    | 0              |          |
| ATP2A1                          | 0.824    | 1.09E-07       |          |
| VPS9D1                          | 0.817    | 0.002386013963 |          |
| CLASP2                          | 0.815    | 4.89E-12       |          |
| FUBP1                           | 0.814    | 7.18E-09       |          |
| PLEKHA1                         | 0.806    | 0              |          |
| AGAP4                           | 0.8      | 0.000114900623 |          |
| RAPGEF6                         | 0.797    | 0              |          |
| GSN                             | 0.788    | 5.86E-11       |          |
| GULP1                           | 0.787    | 0              |          |
| SBF1                            | 0.784    | 2.68E-09       |          |
| PLEKHA1                         | 0.778    | 0              |          |
| SORBS1                          | 0.777    | 9.52E-08       |          |
| PPFIBP1                         | 0.773    | 0              |          |
| SLC9A5                          | 0.773    | 3.90E-10       |          |
| TLE2                            | 0.769    | 3.07E-10       |          |
| KIF21A                          | 0.766    | 0              |          |
| SYTL2                           | 0.76     | 0              |          |
| SPTAN1                          | 0.759    | 0              |          |
| MTTP                            | 0.745    | 3.17E-09       |          |

|                |       |                |
|----------------|-------|----------------|
| CAST           | 0.662 | 2.11E-09       |
| SYTL2          | 0.66  | 0              |
| RNF146         | 0.658 | 4.86E-08       |
| CTD-2378E12.1  | 0.655 | 0.02204339488  |
| DPH3           | 0.651 | 0              |
| SNHG14         | 0.65  | 2.78E-07       |
| RAI14          | 0.649 | 0              |
| MCOLN3         | 0.648 | 3.05E-06       |
| ZNF814         | 0.647 | 0.002347592929 |
| FAM86B3P       | 0.64  | 0.01525821969  |
| OSBPL6         | 0.635 | 0              |
| RP11-33B1.1    | 0.635 | 0.000502483757 |
| RP11-421L21.3  | 0.634 | 2.30E-06       |
| KIAA1468       | 0.631 | 9.58E-12       |
| TMEM218        | 0.631 | 8.71E-05       |
| NDUFB2         | 0.623 | 7.31E-06       |
| PAQR6          | 0.619 | 4.35E-07       |
| TPT1-AS1       | 0.619 | 0.004168487247 |
| ICA1L          | 0.618 | 0.008958063124 |
| AC074286.1     | 0.616 | 6.59E-11       |
| TWF1           | 0.612 | 8.15E-05       |
| PPP2R3C        | 0.611 | 5.99E-06       |
| PPP1R12B       | 0.611 | 0.03813114754  |
| CPT1B          | 0.61  | 4.70E-13       |
| MROH8          | 0.609 | 0.001277328111 |
| MRNIP          | 0.604 | 1.26E-05       |
| CLEC16A        | 0.601 | 0.001796423469 |
| TEAD1          | 0.599 | 8.25E-14       |
| RPL17-C18orf32 | 0.596 | 0              |
| NEDD1          | 0.596 | 3.39E-06       |
| ADGRG6         | 0.595 | 2.89E-14       |
| FDFT1          | 0.595 | 1.01E-05       |
| ANAPC10        | 0.592 | 0.006742072944 |
| NBR2           | 0.583 | 2.65E-07       |
| USP32P3        | 0.582 | 1.10E-08       |
| IMMP1L         | 0.579 | 1.01E-07       |
| TRIM16         | 0.577 | 0.006143326895 |
| C14orf93       | 0.576 | 0.002308460508 |
| SDHAP2         | 0.572 | 0              |
| TCAF1          | 0.57  | 0.000133178287 |
| ZNF571         | 0.57  | 0.002377389601 |
| DAG1           | 0.562 | 2.12E-05       |
| NDUFB2         | 0.561 | 1.31E-05       |
| FAM86EP        | 0.559 | 5.49E-05       |
| PPRC1          | 0.558 | 7.52E-13       |
| RSG1           | 0.557 | 5.59E-05       |
| RP11-371E8.4   | 0.557 | 0.000823192753 |
| CNOT2          | 0.556 | 8.05E-05       |
| SLCO4A1        | 0.556 | 0.000610301062 |

|               |       |                |
|---------------|-------|----------------|
| WDFY3         | 0.733 | 0              |
| SPAG9         | 0.73  | 0              |
| PRMT2         | 0.729 | 0              |
| TMEM135       | 0.729 | 5.59E-06       |
| XRRA1         | 0.728 | 5.96E-06       |
| U2AF1L4       | 0.725 | 9.67E-13       |
| ZNF706        | 0.718 | 1.02E-09       |
| MRPL43        | 0.71  | 6.77E-07       |
| CAST          | 0.698 | 0              |
| ZNF391        | 0.698 | 7.31E-07       |
| SORBS3        | 0.697 | 1.53E-06       |
| SUZ12P1       | 0.696 | 5.79E-08       |
| MICAL3        | 0.695 | 9.30E-11       |
| MED24         | 0.695 | 1.34E-05       |
| NEXN          | 0.687 | 4.41E-07       |
| RP11-274B21.1 | 0.682 | 1.63E-09       |
| CENPV         | 0.682 | 5.11E-08       |
| SORBS1        | 0.681 | 1.03E-06       |
| HLA-L         | 0.674 | 0.000182498683 |
| CENPJ         | 0.667 | 0.008553574934 |
| MPPE1         | 0.665 | 2.32E-06       |
| U2AF1L4       | 0.662 | 2.54E-11       |
| MAP3K6        | 0.66  | 0.000183314615 |
| FHL2          | 0.659 | 1.87E-07       |
| TMBIM6        | 0.658 | 3.62E-07       |
| PCBP1-AS1     | 0.657 | 0.003866796193 |
| MYO18A        | 0.652 | 0              |
| PLD3          | 0.65  | 3.15E-06       |
| CACNB4        | 0.65  | 7.65E-06       |
| GPM6A         | 0.649 | 2.67E-10       |
| NQO1          | 0.647 | 0              |
| C19orf60      | 0.647 | 1.65E-09       |
| ABI1          | 0.644 | 0              |
| RSRP1         | 0.639 | 0              |
| RBM5          | 0.637 | 0              |
| SYNJ1         | 0.634 | 4.13E-11       |
| EFCAB13       | 0.634 | 3.12E-05       |
| PNISR         | 0.633 | 0              |
| RASSF8-AS1    | 0.633 | 2.67E-10       |
| VLDLR         | 0.626 | 0              |
| PHACTR4       | 0.626 | 9.42E-06       |
| DNAJC7        | 0.624 | 2.54E-07       |
| UBA3          | 0.622 | 0.001965233616 |
| SNX21         | 0.621 | 2.35E-05       |
| YY1AP1        | 0.617 | 0              |
| DGKH          | 0.615 | 4.55E-07       |
| CTD-2341M24.1 | 0.612 | 5.70E-05       |
| PAQR3         | 0.61  | 2.01E-05       |
| CASK          | 0.608 | 4.65E-08       |

|               |       |                |
|---------------|-------|----------------|
| EXO1          | 0.555 | 0              |
| ZNF189        | 0.554 | 9.33E-10       |
| MAX           | 0.553 | 1.66E-10       |
| SOS1          | 0.553 | 2.09E-06       |
| PLD3          | 0.551 | 4.25E-06       |
| U2AF1L4       | 0.55  | 1.56E-09       |
| WIPI2         | 0.549 | 2.10E-05       |
| POLL          | 0.548 | 0.001950407967 |
| RP11-705C15.2 | 0.542 | 4.86E-07       |
| TMEM161B-AS1  | 0.54  | 1.95E-07       |
| ARHGEF9       | 0.538 | 3.67E-09       |
| MORC2         | 0.537 | 0.006121948866 |
| COA1          | 0.536 | 8.02E-12       |
| C1orf65       | 0.536 | 0.001578796476 |
| CADM2         | 0.535 | 5.93E-06       |
| TMEM161B-AS1  | 0.534 | 8.81E-13       |
| FBXL12        | 0.533 | 3.50E-05       |
| LINC01001     | 0.533 | 0.01082847443  |
| RWDD3         | 0.532 | 1.07E-06       |
| TMEM254       | 0.532 | 0.000427698002 |
| SUOX          | 0.531 | 4.75E-05       |
| CCDC150       | 0.528 | 0.000138227630 |
| C1orf50       | 0.527 | 3.15E-07       |
| PHYKPL        | 0.526 | 4.88E-07       |
| MRNIP         | 0.526 | 0.000354435123 |
| ERBIN         | 0.523 | 0              |
| C3orf18       | 0.523 | 0.000723779315 |
| DENND4C       | 0.52  | 0              |
| CSAD          | 0.52  | 0.000292367023 |
| RPL17         | 0.518 | 0              |
| RPL17         | 0.518 | 1.66E-09       |
| RSRC2         | 0.517 | 0.000124092158 |
| NUDT13        | 0.517 | 0.000847919809 |
| GGT1          | 0.515 | 3.61E-05       |
| DIAPH2        | 0.514 | 0.000176928792 |
| ANAPC16       | 0.512 | 0              |
| SGCE          | 0.512 | 0              |
| IMMP1L        | 0.512 | 3.81E-13       |
| STX16-NPEPL1  | 0.512 | 0.000287498151 |
| DYNLL1        | 0.512 | 0.001232062067 |
| CSAD          | 0.51  | 0.000152454658 |
| SLCO4A1       | 0.51  | 0.006698640151 |
| LINC01128     | 0.51  | 0.02372588051  |
| SHF           | 0.508 | 0.000774571168 |
| ZNF611        | 0.506 | 0.00374323208  |
| OPA1          | 0.506 | 0.01205057511  |
| C6orf52       | 0.505 | 0.01885208174  |
| FANCI         | 0.504 | 3.29E-08       |
| RWDD3         | 0.503 | 0.000293170732 |

|          |       |                |
|----------|-------|----------------|
| GUSBP11  | 0.608 | 8.54E-06       |
| FUBP1    | 0.606 | 5.11E-05       |
| BCAS4    | 0.605 | 0              |
| FNBP1    | 0.604 | 0              |
| MXRA7    | 0.604 | 0              |
| TNIK     | 0.604 | 3.94E-11       |
| ULK3     | 0.603 | 0.02679711654  |
| ARL4A    | 0.602 | 0              |
| ZCWPW2   | 0.602 | 4.72E-09       |
| TMEM161A | 0.602 | 4.20E-05       |
| PPA2     | 0.601 | 1.19E-07       |
| TNC      | 0.601 | 0.000541520201 |
| ANKRD12  | 0.597 | 0              |
| CSNK1G3  | 0.597 | 5.04E-07       |
| SYTL2    | 0.596 | 0.000166142762 |
| RALGAPA1 | 0.594 | 8.12E-08       |
| AP1G1    | 0.594 | 0.00126477858  |
| RPRD2    | 0.591 | 0              |
| ZNF584   | 0.59  | 5.49E-08       |
| TEAD4    | 0.59  | 7.68E-06       |
| NME4     | 0.59  | 0.000285155921 |
| FHL2     | 0.59  | 0.02228946003  |
| ZNF584   | 0.589 | 6.35E-08       |
| EMC3-AS1 | 0.589 | 0.003046176652 |
| FAM173B  | 0.584 | 0              |
| SUZ12P1  | 0.583 | 1.11E-06       |
| NSFL1C   | 0.582 | 0              |
| MGRN1    | 0.582 | 1.44E-07       |
| NIN      | 0.581 | 0              |
| FGFR1OP2 | 0.58  | 0              |
| AFDN     | 0.579 | 4.69E-10       |
| ZNF584   | 0.579 | 3.95E-08       |
| ZNF195   | 0.579 | 0.006463478574 |
| CTNND1   | 0.578 | 0              |
| FIRRE    | 0.578 | 0.03072258172  |
| PPIP5K2  | 0.577 | 0.001101883147 |
| EPB41L2  | 0.576 | 5.39E-12       |
| TOX2     | 0.576 | 0.02126672239  |
| MCTP1    | 0.575 | 1.56E-08       |
| C9orf3   | 0.575 | 0.000766624702 |
| PER3     | 0.575 | 0.003807338828 |
| MARK3    | 0.574 | 0              |
| WARS     | 0.573 | 9.26E-05       |
| TTC28    | 0.572 | 6.78E-07       |
| ELF2     | 0.572 | 0.001701782054 |
| CTNND1   | 0.57  | 0              |
| RPS24    | 0.57  | 5.37E-11       |
| STAG3L3  | 0.569 | 0.000438379529 |
| NUP214   | 0.564 | 0.006949996165 |



|                |       |                |
|----------------|-------|----------------|
| AREL1          | 0.502 | 0.001735749298 |
| HMGXB4         | 0.501 | 0              |
| RP11-274B21.14 | 0.501 | 0.000902998005 |
| FAM86EP        | 0.499 | 0.001505065008 |
| LCA5L          | 0.499 | 0.0264779633   |
| GOSR2          | 0.498 | 8.57E-05       |
| ELMOD3         | 0.498 | 9.02E-05       |
| CLHC1          | 0.498 | 9.57E-05       |
| AC004076.9     | 0.498 | 0.000121420327 |
| MIOS           | 0.497 | 0.000153038993 |
| NFRKB          | 0.497 | 0.000185977085 |
| HSCB           | 0.496 | 5.71E-10       |
| TRIM16         | 0.495 | 0.002239049543 |
| RP11-156P1.3   | 0.494 | 0.000788106904 |
| DTNB           | 0.491 | 0.000853855443 |
| SDHAP1         | 0.49  | 0              |
| RP11-705C15.2  | 0.49  | 4.12E-05       |
| SEPT2          | 0.489 | 0.000119680357 |
| DCLK2          | 0.488 | 7.92E-10       |
| PBRM1          | 0.487 | 0.002131254622 |
| GAB1           | 0.485 | 1.31E-05       |
| SMARCC2        | 0.483 | 0.000311022291 |
| SUOX           | 0.483 | 0.02072133492  |
| PLCB4          | 0.482 | 0.000163314841 |
| INVS           | 0.479 | 0.00118875574  |
| HCG18          | 0.478 | 1.30E-07       |
| PVR            | 0.478 | 0.000204852622 |
| DUXAP9         | 0.478 | 0.03303492877  |
| NHSL1          | 0.476 | 0.007436656522 |
| SLC3A2         | 0.475 | 0              |
| BPHL           | 0.475 | 1.12E-05       |
| UBA2           | 0.474 | 0.001456868059 |
| GCSH           | 0.473 | 0.009167109226 |
| VCAN           | 0.471 | 3.38E-05       |
| SHF            | 0.471 | 0.001004510926 |
| TMEM241        | 0.469 | 2.54E-05       |
| RP11-9G1.3     | 0.468 | 2.41E-06       |
| LINC00630      | 0.467 | 0.000207640945 |
| FAM228B        | 0.463 | 0.000586634990 |
| BBS1           | 0.462 | 0.000150335610 |
| LCA5L          | 0.462 | 0.001839490346 |
| ULK4P2         | 0.462 | 0.02777981206  |
| CLEC2D         | 0.461 | 5.17E-05       |
| DHRS4L2        | 0.461 | 0.000641805077 |
| EXO1           | 0.46  | 1.86E-12       |
| CCDC15         | 0.46  | 0.000150335610 |
| ARF4-AS1       | 0.46  | 0.003887141779 |
| ZEB1           | 0.459 | 2.43E-06       |
| MED23          | 0.459 | 5.22E-06       |

|               |       |                |
|---------------|-------|----------------|
| CCDC88A       | 0.561 | 0              |
| CAST          | 0.557 | 0              |
| AP1G1         | 0.557 | 0              |
| WASH2P        | 0.555 | 0.000350375615 |
| PIN4          | 0.554 | 0              |
| SNX14         | 0.554 | 0              |
| LIMCH1        | 0.554 | 1.32E-12       |
| AMPD2         | 0.554 | 0.000293523243 |
| ZNF484        | 0.552 | 3.08E-05       |
| ZCWPW1        | 0.552 | 3.10E-05       |
| C14orf166     | 0.55  | 0.000144875579 |
| FAM126B       | 0.549 | 5.59E-08       |
| EPB41L2       | 0.548 | 4.47E-06       |
| C19orf60      | 0.546 | 1.17E-08       |
| TMEM18        | 0.545 | 0              |
| ITGB3BP       | 0.545 | 0              |
| KIAA1191      | 0.544 | 0.000153038993 |
| PPM1K         | 0.544 | 0.000961670070 |
| CAST          | 0.543 | 0.000103588851 |
| SLC7A11       | 0.542 | 9.09E-08       |
| CACNB4        | 0.542 | 3.46E-05       |
| FNBP1         | 0.541 | 0              |
| ZCWPW1        | 0.541 | 0.000882828750 |
| ASAP2         | 0.539 | 6.77E-06       |
| FGFR2         | 0.539 | 0.008407926613 |
| RNF146        | 0.538 | 2.89E-08       |
| CEP72         | 0.538 | 1.80E-07       |
| PHACTR4       | 0.538 | 2.41E-06       |
| TSSC4         | 0.535 | 0              |
| RP11-499E18.1 | 0.535 | 0.009473724616 |
| SNX21         | 0.535 | 0.04920193968  |
| WASF3         | 0.534 | 6.92E-10       |
| FNBP1         | 0.534 | 3.18E-05       |
| MARK3         | 0.529 | 0.000491654262 |
| RAB3GAP1      | 0.527 | 5.95E-05       |
| CDC14B        | 0.526 | 1.71E-08       |
| PPIL3         | 0.525 | 1.32E-06       |
| CCDC14        | 0.525 | 0.002598953941 |
| PIGQ          | 0.524 | 0.000241931653 |
| RP11-580I16.2 | 0.524 | 0.006170354981 |
| TMEM18        | 0.523 | 0              |
| MVD           | 0.523 | 0.000142670014 |
| EEF1D         | 0.522 | 1.10E-11       |
| FAM13B        | 0.522 | 3.97E-08       |
| LRCH3         | 0.521 | 5.20E-11       |
| NFYA          | 0.521 | 5.31E-07       |
| MINDY3        | 0.52  | 2.85E-13       |
| SEPT9         | 0.519 | 4.46E-08       |
| CLSTN1        | 0.516 | 0              |

|              |       |                |
|--------------|-------|----------------|
| SPATS2L      | 0.459 | 0.02523595813  |
| PICALM       | 0.458 | 0              |
| CCDC148      | 0.458 | 0.02324707802  |
| CDKL3        | 0.456 | 7.45E-05       |
| PRR34-AS1    | 0.455 | 7.54E-05       |
| C8orf44      | 0.455 | 0.000933997588 |
| ERBIN        | 0.454 | 0.000133179949 |
| FAM86FP      | 0.454 | 0.04253479721  |
| NISCH        | 0.453 | 0.000173761839 |
| C14orf93     | 0.453 | 0.003140202336 |
| NSRP1        | 0.453 | 0.02613073178  |
| SPIN1        | 0.452 | 0.003349315801 |
| CSAD         | 0.452 | 0.00576997794  |
| MED12L       | 0.451 | 0.000624395879 |
| ITPRIPL1     | 0.45  | 4.21E-05       |
| DDR1         | 0.449 | 0.000141064512 |
| SUOX         | 0.449 | 0.001493573318 |
| NBPF8        | 0.448 | 4.38E-05       |
| LRRC37A4P    | 0.448 | 0.000603975683 |
| RP11-345J4.5 | 0.448 | 0.01900449467  |
| NUDT13       | 0.448 | 0.02109524081  |
| SIL1         | 0.447 | 4.68E-06       |
| DDR1         | 0.447 | 0.000114666020 |
| HERC2P9      | 0.447 | 0.001439456619 |
| PARBP        | 0.445 | 8.63E-06       |
| RAD54B       | 0.445 | 0.00493556984  |
| SMUG1        | 0.443 | 0.006943253512 |
| ADGRG1       | 0.443 | 0.009505385205 |
| EPB41L1      | 0.442 | 0.0111182907   |
| CC2D1B       | 0.441 | 1.52E-05       |
| TMEM234      | 0.441 | 0.000117787783 |
| PVR          | 0.441 | 0.000296328986 |
| AGPAT4       | 0.441 | 0.001023745599 |
| DHFR         | 0.441 | 0.004239439132 |
| CDK4         | 0.44  | 0.008685505951 |
| WDR27        | 0.437 | 2.16E-05       |
| TMEM161B-AS1 | 0.436 | 4.27E-09       |
| PCBP1-AS1    | 0.436 | 2.42E-06       |
| ATP11B       | 0.436 | 0.000113072913 |
| DUXAP9       | 0.436 | 0.01476653649  |
| C1RL         | 0.435 | 2.43E-05       |
| PGAP2        | 0.434 | 0.01725172355  |
| CLHC1        | 0.431 | 0.00013661978  |
| STX2         | 0.43  | 0              |
| IMMP1L       | 0.43  | 0              |
| MACF1        | 0.428 | 5.56E-07       |
| MRPS6        | 0.428 | 0.001796423469 |
| PARD3        | 0.427 | 1.53E-12       |
| HCG18        | 0.426 | 0.01832264645  |

|               |       |                |
|---------------|-------|----------------|
| FAM24B        | 0.515 | 1.61E-09       |
| EVI5          | 0.515 | 0.000226627216 |
| XPO6          | 0.514 | 1.03E-05       |
| SNRPN         | 0.514 | 5.03E-05       |
| TTC28-AS1     | 0.514 | 0.001921405105 |
| EEF1D         | 0.512 | 4.25E-06       |
| EEF1D         | 0.51  | 1.39E-05       |
| TNFSF12-TNFSI | 0.503 | 3.25E-06       |
| NEK3          | 0.503 | 0.01092365486  |
| MICAL3        | 0.5   | 1.06E-09       |
| MAGI1         | 0.5   | 4.47E-07       |
| PATJ          | 0.5   | 0.01919460471  |
| ARL4A         | 0.499 | 7.00E-10       |
| EEF1D         | 0.499 | 1.57E-08       |
| ZNF277        | 0.497 | 0              |
| EEF1D         | 0.497 | 1.12E-11       |
| CTNND1        | 0.495 | 1.21E-11       |
| MDM4          | 0.494 | 4.14E-05       |
| RAD51L3-RFFL  | 0.493 | 0.001624246109 |
| KIF3A         | 0.49  | 2.45E-09       |
| SUN1          | 0.489 | 1.12E-05       |
| RIF1          | 0.489 | 0.002957482326 |
| AIFM1         | 0.488 | 0.003549029187 |
| SEPT2         | 0.488 | 0.02613073178  |
| GOLGA4        | 0.487 | 0              |
| CENPU         | 0.484 | 0              |
| TPK1          | 0.484 | 0.01202735009  |
| PMS2CL        | 0.48  | 1.31E-10       |
| TMEM25        | 0.48  | 0.002210906602 |
| EEF1D         | 0.479 | 0.001367554607 |
| ZNF19         | 0.476 | 0.001195407288 |
| ARHGAP11B     | 0.474 | 0              |
| EPB41L2       | 0.474 | 3.36E-07       |
| DPM1          | 0.474 | 0.000332402615 |
| DGKA          | 0.472 | 0.002122617065 |
| NR4A1         | 0.472 | 0.01007221058  |
| EEF1D         | 0.471 | 1.99E-05       |
| DGKH          | 0.471 | 2.68E-05       |
| MRPS15        | 0.47  | 0.003230017772 |
| LRRC27        | 0.468 | 0.003432257142 |
| ABCD4         | 0.467 | 0.000418686846 |
| CATSPER2      | 0.467 | 0.002544829601 |
| CUL5          | 0.466 | 0              |
| TIA1          | 0.465 | 4.53E-11       |
| UGGT2         | 0.462 | 1.74E-10       |
| DNAJB6        | 0.461 | 0.000255290405 |
| ATP11A        | 0.461 | 0.002993621228 |
| GPCPD1        | 0.46  | 0.003724555554 |
| GUK1          | 0.459 | 8.84E-08       |

|            |       |                |
|------------|-------|----------------|
| SEC24B     | 0.425 | 2.17E-11       |
| APEH       | 0.425 | 5.13E-08       |
| COA1       | 0.425 | 1.83E-06       |
| LINC01125  | 0.424 | 0.00448074171  |
| IKZF4      | 0.422 | 0.002024138061 |
| FAM227B    | 0.42  | 0.000671412157 |
| TPM1       | 0.419 | 8.14E-10       |
| CA5B       | 0.418 | 0.000115979367 |
| MIR22HG    | 0.418 | 0.01461642436  |
| PSMA3-AS1  | 0.417 | 1.58E-13       |
| NUMA1      | 0.417 | 2.52E-09       |
| SLC25A29   | 0.417 | 0.001127335634 |
| XRRA1      | 0.417 | 0.005245556191 |
| SEPT6      | 0.414 | 4.59E-07       |
| ENTPD1     | 0.413 | 0.000150335610 |
| ARL13B     | 0.413 | 0.009312346136 |
| ZNF789     | 0.412 | 0.001102013063 |
| C1orf159   | 0.411 | 0.00746974798  |
| PICALM     | 0.41  | 0.004066478452 |
| CCDC7      | 0.41  | 0.03915855325  |
| BMP2K      | 0.409 | 4.44E-05       |
| COX20      | 0.408 | 5.10E-07       |
| PARPBP     | 0.408 | 7.60E-05       |
| SEPT6      | 0.408 | 0.001889786218 |
| CCDC7      | 0.407 | 0.00357102587  |
| CPNE3      | 0.406 | 4.50E-07       |
| SEMA4F     | 0.406 | 1.72E-06       |
| ING4       | 0.405 | 0.001631986303 |
| DLEU2      | 0.404 | 1.13E-06       |
| ZNF211     | 0.403 | 0.002075918316 |
| KHK        | 0.403 | 0.003344420368 |
| TRIM16     | 0.403 | 0.01092216805  |
| ULK4       | 0.403 | 0.01803272989  |
| DOCK7      | 0.402 | 7.63E-12       |
| FOXM1      | 0.4   | 0              |
| STX16      | 0.4   | 4.53E-08       |
| TMEM44-AS1 | 0.4   | 0.01519053624  |
| SNAPC5     | 0.399 | 0.001312004339 |
| PARPBP     | 0.397 | 1.97E-07       |
| RASSF8-AS1 | 0.397 | 0.0415224856   |
| TRAPPC13   | 0.396 | 1.37E-05       |
| OPA1       | 0.396 | 0.002268274405 |
| FAM66C     | 0.396 | 0.02043424899  |
| ACYP2      | 0.395 | 0.000412618254 |
| NISCH      | 0.395 | 0.001052296447 |
| CLEC2D     | 0.395 | 0.02024804826  |
| NAP1L4     | 0.394 | 6.18E-07       |
| TPM1       | 0.394 | 0.000370694914 |
| FAM76B     | 0.393 | 0.000260001515 |

|           |       |                |
|-----------|-------|----------------|
| LUC7L2    | 0.459 | 0.003536476151 |
| ANKRD10   | 0.459 | 0.01041046655  |
| AP2M1     | 0.458 | 0              |
| ZNF419    | 0.458 | 0.001367971256 |
| MCTP1     | 0.457 | 5.72E-11       |
| ARHGAP11B | 0.456 | 1.21E-06       |
| CIRBP     | 0.456 | 1.72E-06       |
| USP45     | 0.455 | 7.84E-09       |
| CACNB4    | 0.455 | 0.000117862634 |
| PPIL3     | 0.454 | 5.63E-11       |
| FAM221A   | 0.453 | 0              |
| PFDN5     | 0.453 | 0.000706638320 |
| APLP1     | 0.448 | 3.77E-07       |
| BEST1     | 0.448 | 0.01511068212  |
| SDR39U1   | 0.447 | 2.11E-05       |
| FNIP2     | 0.447 | 0.000114599384 |
| SEPT2     | 0.447 | 0.001538786731 |
| PRKAR1A   | 0.445 | 3.04E-05       |
| DNAJC4    | 0.445 | 0.03833779699  |
| CCSER2    | 0.444 | 0              |
| TEX22     | 0.444 | 5.32E-13       |
| CLASP1    | 0.444 | 9.89E-07       |
| CACTIN    | 0.444 | 2.72E-05       |
| NADSYN1   | 0.443 | 2.65E-05       |
| FAM135A   | 0.442 | 1.50E-07       |
| JKAMP     | 0.442 | 4.09E-07       |
| MAP4K4    | 0.441 | 0              |
| CANT1     | 0.441 | 0.004358181142 |
| VPS13B    | 0.44  | 0.00206399437  |
| WDR27     | 0.439 | 6.79E-07       |
| FBRS      | 0.439 | 8.18E-06       |
| ERBIN     | 0.439 | 0.005843897436 |
| XRRA1     | 0.438 | 0.000133108710 |
| LRRC75B   | 0.438 | 0.000475420331 |
| LETM2     | 0.437 | 1.41E-06       |
| MED23     | 0.436 | 3.90E-07       |
| BNIP2     | 0.435 | 0              |
| PUF60     | 0.435 | 2.28E-10       |
| ABHD14B   | 0.435 | 4.64E-06       |
| CTNND1    | 0.434 | 2.12E-08       |
| CTNND1    | 0.434 | 2.44E-08       |
| RALGAPA1  | 0.434 | 0.003894370242 |
| PSMA3-AS1 | 0.432 | 7.31E-06       |
| WARS      | 0.432 | 0.001631060496 |
| TTC7A     | 0.432 | 0.004065365915 |
| TAZ       | 0.431 | 7.20E-06       |
| NOD1      | 0.431 | 0.000453765727 |
| CTNND1    | 0.43  | 1.62E-11       |
| HPS1      | 0.43  | 1.28E-05       |

|             |       |                |
|-------------|-------|----------------|
| NEO1        | 0.392 | 1.17E-08       |
| ABCA11P     | 0.39  | 0.000855021521 |
| STX16       | 0.389 | 3.14E-09       |
| NFIB        | 0.389 | 0.000919138558 |
| NME6        | 0.388 | 0.001460213182 |
| KIF21B      | 0.388 | 0.005890845208 |
| PICALM      | 0.387 | 0              |
| MRPS28      | 0.387 | 0.01459665929  |
| RWDD3       | 0.386 | 0.000293305197 |
| FEZ2        | 0.386 | 0.006549900596 |
| TMEM260     | 0.384 | 4.25E-06       |
| MAP4K4      | 0.384 | 6.13E-05       |
| KB-1572G7.2 | 0.382 | 0.002398430612 |
| PROCA1      | 0.381 | 0.000336973187 |
| CREB1       | 0.381 | 0.001185968339 |
| TAF1        | 0.38  | 3.53E-07       |
| ANKAR       | 0.38  | 6.03E-05       |
| ZSCAN31     | 0.38  | 8.71E-05       |
| SGCE        | 0.38  | 0.003512996048 |
| ATP5C1      | 0.379 | 0.000431072153 |
| POLL        | 0.378 | 4.71E-05       |
| ZNF680      | 0.377 | 4.99E-05       |
| ZNF253      | 0.377 | 0.000181045047 |
| XIAP        | 0.377 | 0.001426975572 |
| LTBP1       | 0.376 | 0.008353634004 |
| NME6        | 0.375 | 7.94E-06       |
| ELMOD3      | 0.375 | 0.000118488895 |
| SREBF1      | 0.375 | 0.0013265261   |
| CCNI        | 0.374 | 0.000776881723 |
| ENSA        | 0.374 | 0.001478634489 |
| NFIB        | 0.374 | 0.002058724474 |
| ANAPC16     | 0.373 | 2.52E-07       |
| MGAT5       | 0.373 | 0.01190796755  |
| C3orf18     | 0.372 | 0.01820919836  |
| RPS3A       | 0.371 | 1.58E-06       |
| ZNF680      | 0.37  | 6.13E-05       |
| CC2D2A      | 0.369 | 0.01564723304  |
| BDNF-AS     | 0.368 | 0.00177508727  |
| ADGRL2      | 0.368 | 0.004113255113 |
| ZSCAN31     | 0.367 | 0.000114900623 |
| MBD5        | 0.366 | 0.000195634142 |
| RPL17       | 0.366 | 0.000484349733 |
| PGAP2       | 0.366 | 0.001732186964 |
| RTN2        | 0.366 | 0.00365172218  |
| CC2D2A      | 0.366 | 0.01617330057  |
| SGSM2       | 0.365 | 1.48E-06       |
| ZC3H18      | 0.365 | 0.001733304234 |
| GK          | 0.365 | 0.002839945502 |
| RAD51D      | 0.364 | 0.04505876384  |

|              |       |                |
|--------------|-------|----------------|
| TSSC4        | 0.429 | 1.03E-08       |
| MYL6         | 0.427 | 0              |
| CEP57L1      | 0.427 | 0.000731961416 |
| C4orf36      | 0.427 | 0.002784788117 |
| GOLGB1       | 0.427 | 0.04360660297  |
| DBR1         | 0.426 | 0              |
| ZFAND5       | 0.426 | 0              |
| IMMP1L       | 0.426 | 0.00831961416  |
| QKI          | 0.424 | 0              |
| OFD1         | 0.423 | 0              |
| AC024560.3   | 0.423 | 4.05E-12       |
| GOLGB1       | 0.423 | 0.01706419273  |
| ORMDL1       | 0.422 | 0              |
| SDR39U1      | 0.422 | 1.80E-10       |
| RP11-51F16.8 | 0.422 | 1.24E-08       |
| NAGK         | 0.422 | 0.003548756426 |
| MON2         | 0.421 | 0.000963896981 |
| RALGAPA2     | 0.421 | 0.0255521065   |
| SEMA4F       | 0.419 | 0.000441818321 |
| RAB34        | 0.418 | 4.03E-06       |
| HMGN1        | 0.417 | 0              |
| FAAP20       | 0.417 | 6.06E-08       |
| ELFN2        | 0.417 | 0.001125297341 |
| NR4A1        | 0.417 | 0.02371629734  |
| PKIG         | 0.416 | 0              |
| PXN          | 0.416 | 3.39E-06       |
| TMEM116      | 0.416 | 1.88E-05       |
| MBD1         | 0.415 | 0.000907332278 |
| TCF7L2       | 0.415 | 0.002988281976 |
| FBXO24       | 0.414 | 6.11E-06       |
| SERPINB6     | 0.414 | 0.000387914863 |
| MLLT6        | 0.413 | 3.20E-06       |
| HMGN1        | 0.412 | 7.73E-13       |
| GPR157       | 0.412 | 0.00512657653  |
| RNF146       | 0.411 | 0.009704814921 |
| FGFR2        | 0.411 | 0.01160808791  |
| PILRB        | 0.41  | 9.00E-11       |
| NFASC        | 0.41  | 2.42E-06       |
| SLC35B1      | 0.41  | 0.000697169288 |
| MPRIP        | 0.41  | 0.00173447688  |
| KIAA1109     | 0.408 | 1.95E-08       |
| JOSD2        | 0.407 | 2.52E-07       |
| C17orf62     | 0.405 | 4.76E-07       |
| CDK5RAP2     | 0.404 | 7.74E-05       |
| THAP6        | 0.404 | 0.001289105061 |
| ZFX          | 0.404 | 0.01252426593  |
| MDM4         | 0.403 | 4.41E-05       |
| HNRNPA2B1    | 0.402 | 0              |
| PHACTR4      | 0.402 | 0.000288011465 |

|               |       |                |
|---------------|-------|----------------|
| SETD9         | 0.363 | 3.97E-05       |
| PLEKHM1P1     | 0.363 | 0.002766188792 |
| SLC25A26      | 0.363 | 0.00798304603  |
| POGLUT1       | 0.363 | 0.01651821476  |
| RP11-849H4.2  | 0.363 | 0.01809089575  |
| RP11-421L21.3 | 0.362 | 1.04E-06       |
| PCNX1         | 0.362 | 6.66E-05       |
| ANXA2         | 0.362 | 0.006386827087 |
| KB-1572G7.2   | 0.362 | 0.008304198588 |
| PRKRIP1       | 0.361 | 2.37E-05       |
| MRPL52        | 0.361 | 0.004738364736 |
| KIAA0586      | 0.36  | 4.82E-05       |
| TWF1          | 0.36  | 0.000148574459 |
| MRNIP         | 0.36  | 0.01335046322  |
| RPS3A         | 0.359 | 3.45E-09       |
| GSAP          | 0.358 | 1.17E-05       |
| ARMCX5-GPRA   | 0.358 | 0.000666033342 |
| UBE2Q2P2      | 0.354 | 6.56E-05       |
| TCTN1         | 0.353 | 0.005171587045 |
| NADK          | 0.352 | 5.59E-14       |
| ZFAND6        | 0.352 | 5.86E-11       |
| RALY          | 0.352 | 0.000541806568 |
| DRAM2         | 0.351 | 8.31E-06       |
| TOPORS-AS1    | 0.351 | 0.001855130247 |
| AP3S2         | 0.351 | 0.01954407125  |
| MAP4K4        | 0.35  | 1.98E-11       |
| DENND4A       | 0.35  | 1.22E-07       |
| TPM1          | 0.35  | 0.002058724474 |
| GIGYF2        | 0.35  | 0.03294531518  |
| PICALM        | 0.349 | 0.000159697227 |
| YPEL5         | 0.348 | 0              |
| PPRC1         | 0.347 | 2.35E-13       |
| FAM76B        | 0.347 | 2.25E-07       |
| ZNF772        | 0.347 | 0.03664495534  |
| ZGRF1         | 0.346 | 2.11E-06       |
| ESYT2         | 0.346 | 0.001829980388 |
| DLEU2         | 0.345 | 6.76E-07       |
| PIGN          | 0.345 | 0.002929997565 |
| BCAT2         | 0.345 | 0.01860693698  |
| CDC25C        | 0.343 | 8.74E-06       |
| ADARB1        | 0.343 | 2.24E-05       |
| BDNF-AS       | 0.343 | 0.001406429329 |
| RP11-421I10.1 | 0.342 | 6.74E-05       |
| FBXL2         | 0.342 | 0.002142500663 |
| LIPT1         | 0.342 | 0.01909479024  |
| TMEM62        | 0.341 | 0.01692620548  |
| NADK          | 0.34  | 2.89E-14       |
| PPA2          | 0.34  | 1.28E-09       |
| CDKL1         | 0.34  | 2.97E-05       |

|               |       |                |
|---------------|-------|----------------|
| SNAP47        | 0.402 | 0.00308346604  |
| TRMU          | 0.401 | 0.000653105210 |
| TEX30         | 0.4   | 4.43E-06       |
| UBA2          | 0.399 | 5.38E-06       |
| PPP1R3E       | 0.399 | 0.000150335610 |
| ZFYVE27       | 0.398 | 5.08E-07       |
| IFT122        | 0.398 | 0.005789128017 |
| PLEKHA8       | 0.397 | 4.16E-05       |
| ATXN2         | 0.397 | 5.72E-05       |
| ZNF142        | 0.397 | 0.01252426593  |
| GUK1          | 0.395 | 1.21E-08       |
| GLS           | 0.395 | 0.000238932773 |
| ELOVL5        | 0.395 | 0.003902246943 |
| BCL2L2        | 0.394 | 1.28E-06       |
| ARHGAP11B     | 0.392 | 2.89E-10       |
| SYTL4         | 0.392 | 2.13E-05       |
| ZNF383        | 0.392 | 0.007705740173 |
| ZNF684        | 0.39  | 9.79E-05       |
| DUSP12        | 0.39  | 0.001440110946 |
| PQLC1         | 0.39  | 0.003043669782 |
| SNX25         | 0.389 | 5.65E-12       |
| OXR1          | 0.389 | 1.25E-11       |
| SEPT7         | 0.389 | 8.87E-05       |
| MYO9A         | 0.389 | 0.001802867873 |
| TIAM1         | 0.388 | 0.02905195337  |
| EXOC7         | 0.387 | 0              |
| FAAP20        | 0.387 | 9.33E-08       |
| EPB41L2       | 0.387 | 1.18E-05       |
| SNHG17        | 0.386 | 7.64E-10       |
| C21orf62-AS1  | 0.385 | 0.01673793337  |
| CDKL3         | 0.385 | 0.04552554741  |
| CTAGE5        | 0.384 | 9.02E-05       |
| ST3GAL6-AS1   | 0.384 | 0.01134847022  |
| USP36         | 0.382 | 2.27E-05       |
| CARM1         | 0.381 | 2.60E-08       |
| STIM1         | 0.381 | 6.19E-06       |
| PPM1K         | 0.38  | 1.05E-06       |
| ZCWPW2        | 0.377 | 4.60E-06       |
| RP11-315D16.2 | 0.377 | 0.001966429415 |
| SVIL          | 0.376 | 2.63E-06       |
| GCSH          | 0.376 | 0.01290998373  |
| HMGN1         | 0.375 | 7.19E-11       |
| ZNF519        | 0.373 | 2.79E-06       |
| BCHE          | 0.372 | 1.84E-13       |
| PHC1          | 0.372 | 0.04253479721  |
| ABI1          | 0.371 | 0              |
| SEPT7         | 0.371 | 0.000802562723 |
| MARK3         | 0.369 | 0              |
| CIRBP         | 0.369 | 9.30E-07       |

|                |       |                |
|----------------|-------|----------------|
| POLL           | 0.34  | 0.01394848916  |
| BAG6           | 0.338 | 1.58E-13       |
| LYRM1          | 0.338 | 2.59E-05       |
| IQCB1          | 0.338 | 0.003619441762 |
| SLMAP          | 0.337 | 0              |
| RP4-614C10.2   | 0.337 | 0.000398047305 |
| PGAP2          | 0.337 | 0.04930931816  |
| MARK2          | 0.336 | 0.04088100642  |
| MCM3           | 0.335 | 0              |
| KCTD9          | 0.335 | 0.007073635801 |
| FAHD2A         | 0.335 | 0.02993461557  |
| CARD8          | 0.334 | 6.60E-07       |
| CENPO          | 0.334 | 5.09E-06       |
| KLHL7          | 0.334 | 0.002563569625 |
| AC004381.6     | 0.334 | 0.0241083796   |
| ADAMTS13       | 0.333 | 9.27E-05       |
| SLC50A1        | 0.332 | 1.70E-06       |
| HHLA3          | 0.332 | 0.03495076767  |
| STAG3L4        | 0.331 | 0.000965920658 |
| ANKDD1A        | 0.33  | 5.01E-05       |
| KANK2          | 0.329 | 0.00167889463  |
| ATXN3          | 0.328 | 0.01781677028  |
| TMTC4          | 0.327 | 1.64E-06       |
| POLR2J4        | 0.327 | 0.001407114613 |
| SLC24A1        | 0.326 | 0.0326161793   |
| ZC3H11A        | 0.325 | 1.25E-06       |
| ADGRB2         | 0.325 | 7.12E-06       |
| ZC3H14         | 0.325 | 0.000154138242 |
| ST5            | 0.325 | 0.000714324807 |
| POLL           | 0.325 | 0.000994383049 |
| RAD51D         | 0.325 | 0.01663502083  |
| CBY1           | 0.324 | 0.001921405105 |
| ST3GAL5        | 0.324 | 0.02209414026  |
| OSBPL6         | 0.323 | 1.60E-09       |
| MRPS31P4       | 0.323 | 0.000187247219 |
| KCTD9          | 0.323 | 0.01287710281  |
| ZNF761         | 0.322 | 1.76E-05       |
| RP11-303E16.10 | 0.322 | 0.01648327918  |
| ISCU           | 0.321 | 0.000141830539 |
| CD27-AS1       | 0.321 | 0.000758051464 |
| WIPF1          | 0.321 | 0.004005348732 |
| C8orf44        | 0.321 | 0.01632161566  |
| PTPMT1         | 0.32  | 0              |
| LINC00969      | 0.32  | 2.17E-06       |
| CDKL3          | 0.32  | 0.02984907237  |
| FAM193B        | 0.319 | 2.98E-05       |
| NEK6           | 0.319 | 0.004357067677 |
| ADGRG1         | 0.318 | 0.005039214886 |
| NEDD4          | 0.318 | 0.01072761332  |

|           |       |                |
|-----------|-------|----------------|
| ARMC4     | 0.369 | 0.01357652802  |
| NUDT22    | 0.367 | 3.01E-09       |
| ARHGAP21  | 0.367 | 1.48E-07       |
| DCAF8     | 0.367 | 3.58E-07       |
| GAA       | 0.367 | 8.37E-06       |
| SH3GLB2   | 0.367 | 0.000914633672 |
| PCBP4     | 0.367 | 0.01272273568  |
| GSN       | 0.366 | 1.92E-12       |
| MCTP1     | 0.365 | 1.48E-08       |
| LAS1L     | 0.365 | 2.58E-06       |
| ZNF277    | 0.364 | 0              |
| STRADA    | 0.364 | 9.33E-06       |
| DPY19L2   | 0.364 | 0.001505065008 |
| RIN3      | 0.363 | 9.41E-05       |
| SP140L    | 0.363 | 0.000167484406 |
| KLHDC1    | 0.363 | 0.04492330258  |
| MYO5A     | 0.362 | 0              |
| ARIH2     | 0.362 | 1.11E-06       |
| PDPR      | 0.362 | 0.01384958618  |
| PICALM    | 0.361 | 0              |
| FAM24B    | 0.361 | 1.17E-08       |
| BORA      | 0.361 | 0.000221708809 |
| NHLRC3    | 0.36  | 5.79E-08       |
| PCBP1-AS1 | 0.359 | 2.03E-06       |
| ASAH2B    | 0.359 | 0.000381490862 |
| RTKN      | 0.359 | 0.002527404038 |
| EED       | 0.359 | 0.02081308966  |
| MCRIIP2   | 0.358 | 0.003349315801 |
| TEX15     | 0.357 | 2.61E-05       |
| TTLL3     | 0.357 | 0.000915025142 |
| ZFX       | 0.357 | 0.03417336386  |
| KIF23     | 0.356 | 4.47E-13       |
| NBEAL1    | 0.355 | 0.000238314411 |
| SUZ12P1   | 0.355 | 0.004564802919 |
| KLHL24    | 0.354 | 7.54E-08       |
| SAMD4B    | 0.354 | 0.01422507111  |
| ZNF786    | 0.354 | 0.04214164797  |
| METTL26   | 0.353 | 0.000414160831 |
| BROX      | 0.353 | 0.00330261625  |
| FAM228B   | 0.353 | 0.00823389498  |
| SREBF2    | 0.353 | 0.02530794582  |
| ARHGEF11  | 0.352 | 5.07E-07       |
| ITPR1     | 0.351 | 0.008916593862 |
| TOP1MT    | 0.35  | 1.38E-06       |
| TIA1      | 0.349 | 1.08E-13       |
| C17orf62  | 0.348 | 5.97E-10       |
| TANC2     | 0.348 | 1.26E-07       |
| C19orf12  | 0.347 | 0.000170947032 |
| NKTR      | 0.346 | 6.05E-08       |

|              |       |                |
|--------------|-------|----------------|
| FAM208B      | 0.318 | 0.0313341614   |
| ZCWPW2       | 0.318 | 0.04732471362  |
| TMEM161B-AS1 | 0.317 | 2.86E-06       |
| CENPO        | 0.316 | 2.58E-09       |
| PCNX1        | 0.316 | 0.006891588316 |
| SLC4A7       | 0.315 | 0.000246288097 |
| ELMOD3       | 0.315 | 0.04376813577  |
| LINC00174    | 0.314 | 0.000859083617 |
| MAN2B2       | 0.313 | 0.000101047875 |
| CHEK1        | 0.313 | 0.000281241984 |
| GK           | 0.313 | 0.001523891106 |
| CDC25C       | 0.312 | 1.94E-06       |
| AK2          | 0.312 | 9.96E-06       |
| SMUG1        | 0.312 | 0.000755532908 |
| CCDC18-AS1   | 0.312 | 0.02759347156  |
| PARBP        | 0.311 | 0.000285160773 |
| LRP2BP       | 0.311 | 0.01178140079  |
| ZBTB1        | 0.31  | 6.58E-06       |
| MATR3        | 0.31  | 0.004029235655 |
| FBF1         | 0.31  | 0.01257062869  |
| MDM1         | 0.31  | 0.01658132986  |
| NFIB         | 0.31  | 0.01760896452  |
| IKZF4        | 0.31  | 0.02968938387  |
| PSMA3-AS1    | 0.308 | 1.18E-05       |
| STAG2        | 0.307 | 0.000101047875 |
| MCAT         | 0.307 | 0.000304133418 |
| ZNF655       | 0.307 | 0.002332507155 |
| MIATNB       | 0.307 | 0.01784243899  |
| ROBO1        | 0.306 | 2.98E-07       |
| TMUB2        | 0.306 | 0.000469433957 |
| FAHD2A       | 0.306 | 0.0211341988   |
| CAPRN2       | 0.305 | 0.000240092465 |
| ZSCAN23      | 0.305 | 0.000418220202 |
| CLHC1        | 0.305 | 0.02539319847  |
| PLA2G12A     | 0.304 | 1.31E-08       |
| DLGAP1-AS1   | 0.304 | 4.07E-06       |
| FAM45A       | 0.304 | 0.000180077800 |
| PPP4R1       | 0.304 | 0.000788106904 |
| CRBN         | 0.303 | 2.89E-14       |
| KIF21A       | 0.303 | 2.13E-08       |
| GDAP2        | 0.303 | 5.13E-05       |
| ODF2L        | 0.303 | 0.000402847581 |
| VAPB         | 0.303 | 0.004308658414 |
| MUTYH        | 0.303 | 0.01134847022  |
| EPB41        | 0.303 | 0.01397229194  |
| CLHC1        | 0.302 | 5.10E-06       |
| ZNF76        | 0.302 | 0.001129571315 |
| PPP1R12B     | 0.302 | 0.001936037329 |
| SREBF1       | 0.302 | 0.008461191506 |

|              |       |                |
|--------------|-------|----------------|
| EEF1D        | 0.346 | 5.02E-05       |
| MOK          | 0.346 | 0.000589050278 |
| IFT122       | 0.346 | 0.03306288922  |
| POLE2        | 0.345 | 4.09E-07       |
| FAM161A      | 0.345 | 5.12E-05       |
| KIF1B        | 0.345 | 0.001701782054 |
| SYNE1        | 0.343 | 0.02105099548  |
| TMEM218      | 0.343 | 0.03972173331  |
| MRPS18C      | 0.342 | 3.58E-13       |
| MCM9         | 0.342 | 0.002662136025 |
| MARK3        | 0.341 | 0.000688822865 |
| IKZF4        | 0.341 | 0.007045125414 |
| GOLGA6L9     | 0.341 | 0.009416548364 |
| TNRC18       | 0.341 | 0.03499961163  |
| NPHP3        | 0.34  | 1.09E-05       |
| TPCN2        | 0.34  | 6.03E-05       |
| PPIL3        | 0.339 | 1.93E-05       |
| FAM13B       | 0.339 | 3.76E-05       |
| MFSD12       | 0.339 | 4.34E-05       |
| CACNB4       | 0.339 | 0.000462738566 |
| SCML1        | 0.339 | 0.001379584947 |
| HMMR         | 0.338 | 1.27E-11       |
| NF1          | 0.338 | 2.85E-05       |
| QRICH1       | 0.337 | 0.004077983224 |
| CD27-AS1     | 0.337 | 0.02475961249  |
| KMT5C        | 0.336 | 0.001968293186 |
| C14orf93     | 0.336 | 0.01137520954  |
| TOM1L2       | 0.335 | 6.07E-07       |
| RAD51AP1     | 0.335 | 4.54E-05       |
| March2       | 0.335 | 6.70E-05       |
| YIPF1        | 0.335 | 0.000643276865 |
| N4BP2        | 0.335 | 0.03898426062  |
| DCAF8        | 0.334 | 4.67E-07       |
| PCOLCE       | 0.334 | 0.000261928969 |
| PCBP1-AS1    | 0.334 | 0.003387004345 |
| ZDHHC15      | 0.334 | 0.01080928689  |
| MRPS28       | 0.333 | 0.00106274245  |
| APTX         | 0.332 | 7.79E-09       |
| PGAP2        | 0.332 | 4.64E-06       |
| AGRN         | 0.332 | 1.00E-04       |
| ANO6         | 0.332 | 0.04369154184  |
| RCN1         | 0.332 | 0.04655359236  |
| TEPSIN       | 0.331 | 0.000116615585 |
| RUNX2        | 0.331 | 0.01433428446  |
| FHOD3        | 0.331 | 0.0391410956   |
| AURKB        | 0.33  | 1.60E-09       |
| PCOLCE       | 0.33  | 5.14E-05       |
| RP11-295P9.3 | 0.33  | 0.003522034591 |
| DCAF8        | 0.329 | 9.41E-05       |

|         |       |                |
|---------|-------|----------------|
| PHYKPL  | 0.302 | 0.04422443977  |
| PRKRIP1 | 0.301 | 0.000271826994 |
| EP400NL | 0.301 | 0.000748190390 |
| ZSCAN23 | 0.301 | 0.000960374064 |

|              |       |                |
|--------------|-------|----------------|
| ERMARD       | 0.329 | 0.000145434513 |
| PRPF40B      | 0.329 | 0.001138009614 |
| PYM1         | 0.329 | 0.003959039809 |
| ACTR3B       | 0.328 | 1.08E-13       |
| CCHCR1       | 0.328 | 1.20E-06       |
| NAB1         | 0.328 | 0.000145434513 |
| ZMYM1        | 0.328 | 0.004503457102 |
| SREK1        | 0.327 | 1.42E-06       |
| MTIF3        | 0.327 | 0.000195921564 |
| C1orf162     | 0.327 | 0.007797388202 |
| AHI1         | 0.327 | 0.01187945836  |
| SEPT7        | 0.326 | 0              |
| SLC25A36     | 0.326 | 1.18E-10       |
| MSH5-SAPCD1  | 0.326 | 3.62E-07       |
| ELMOD3       | 0.326 | 0.02558045263  |
| PCMTD1       | 0.325 | 1.42E-06       |
| GORAB        | 0.325 | 0.02241166849  |
| THUMPD3-AS1  | 0.324 | 4.80E-10       |
| PAQR3        | 0.324 | 4.59E-08       |
| RFX2         | 0.324 | 0.000309536167 |
| ARHGEF10     | 0.324 | 0.000880675005 |
| HMGN1        | 0.323 | 0              |
| ACAP2        | 0.323 | 4.91E-13       |
| ILF3         | 0.323 | 1.34E-11       |
| NLRX1        | 0.323 | 8.79E-05       |
| NDEL1        | 0.323 | 0.001234956404 |
| INCENP       | 0.323 | 0.02376597087  |
| SPATA6L      | 0.323 | 0.02903051114  |
| MPHOSPH9     | 0.322 | 8.53E-11       |
| KLHL24       | 0.322 | 0.000150335610 |
| PPIP5K2      | 0.322 | 0.000206175873 |
| ZNF419       | 0.322 | 0.005610157684 |
| ZNF772       | 0.322 | 0.008723427672 |
| TMEM39A      | 0.321 | 2.44E-10       |
| APT X        | 0.321 | 6.31E-06       |
| SPATA4       | 0.321 | 0.00010612589  |
| ZNF711       | 0.32  | 7.32E-08       |
| SPEF2        | 0.32  | 9.18E-05       |
| BAZ1A        | 0.32  | 0.001379584947 |
| PEX7         | 0.32  | 0.002238644159 |
| MAP4K4       | 0.319 | 2.64E-09       |
| TSSC4        | 0.319 | 5.66E-06       |
| SLC2A11      | 0.319 | 9.42E-06       |
| TRIM16       | 0.319 | 0.000782858272 |
| TOP1MT       | 0.317 | 1.32E-09       |
| NSUN5P1      | 0.317 | 0.003212828364 |
| TRAF3IP2-AS1 | 0.317 | 0.01210955425  |
| PAQR3        | 0.317 | 0.04751030201  |
| USP8         | 0.316 | 7.79E-08       |



|               |       |                |
|---------------|-------|----------------|
| ZNF75D        | 0.316 | 0.002220951479 |
| AAK1          | 0.316 | 0.006955259997 |
| SUMF2         | 0.315 | 0              |
| MYO6          | 0.315 | 3.49E-11       |
| GOLT1B        | 0.315 | 5.26E-07       |
| PCBP1-AS1     | 0.315 | 1.22E-05       |
| CCP110        | 0.315 | 0.002784788117 |
| TCEA1         | 0.315 | 0.01533786035  |
| BPTF          | 0.314 | 9.73E-12       |
| SENP7         | 0.314 | 1.18E-10       |
| PPIP5K2       | 0.314 | 2.71E-06       |
| HPS4          | 0.314 | 0.04795517943  |
| RBM6          | 0.313 | 2.49E-06       |
| NUDT13        | 0.313 | 0.000512763401 |
| GATAD2A       | 0.313 | 0.00140484798  |
| RGS19         | 0.313 | 0.003517135917 |
| CD27-AS1      | 0.313 | 0.01675843214  |
| MEIG1         | 0.313 | 0.03122985027  |
| C14orf79      | 0.313 | 0.03336016912  |
| SLC29A1       | 0.312 | 1.18E-05       |
| EEF1D         | 0.311 | 0.000791141303 |
| PDPR          | 0.311 | 0.000800021044 |
| SLC9B1        | 0.311 | 0.006378477914 |
| PFDN5         | 0.31  | 0              |
| TMEM126B      | 0.31  | 4.34E-12       |
| PRPF40A       | 0.309 | 0              |
| DST           | 0.309 | 0              |
| C17orf62      | 0.309 | 1.37E-07       |
| ZDHHC16       | 0.309 | 0.006465468267 |
| ARNTL2        | 0.309 | 0.02166060778  |
| KIAA1468      | 0.309 | 0.03090604922  |
| TCEA1         | 0.308 | 0.000990626250 |
| DHX34         | 0.308 | 0.008437561811 |
| JKAMP         | 0.307 | 2.33E-12       |
| PQLC3         | 0.307 | 6.68E-05       |
| UBXN2B        | 0.307 | 0.000146720567 |
| BORA          | 0.306 | 2.29E-05       |
| TMEM218       | 0.306 | 0.009312346136 |
| HPS5          | 0.306 | 0.04407811637  |
| JKAMP         | 0.305 | 1.06E-12       |
| RP11-452F19.3 | 0.305 | 2.24E-05       |
| ZNF133        | 0.305 | 0.01781677028  |
| SCML1         | 0.304 | 5.26E-08       |
| THRB          | 0.304 | 0.005335128453 |
| C17orf62      | 0.304 | 0.01212190181  |
| FECH          | 0.304 | 0.02354481015  |
| METTL26       | 0.303 | 0.000438744160 |
| RIPK2         | 0.303 | 0.007952215332 |
| METTL25       | 0.303 | 0.02240571123  |

|               |       |                |
|---------------|-------|----------------|
| <b>FBXO44</b> | 0.302 | 0.001244028305 |
| <b>SPEG</b>   | 0.302 | 0.002168602909 |
| <b>TPCN2</b>  | 0.302 | 0.004265354996 |
| <b>BBOF1</b>  | 0.302 | 0.01050857481  |
| <b>RBM6</b>   | 0.301 | 1.54E-10       |
| <b>ULK4</b>   | 0.301 | 8.15E-05       |

**Supplementary Table 4:** Splicing events differing between mesenchymal (MES) and proneural (PN) GSCs, and between MES and PN GBM.

**ASS (alternative splice site 5' or 3'):** genomic coordinates of long and short exons (columns g.coord\_1 and g.coord\_2)

**MXE (mutually exclusive exon):** genomic coordinates of first and second exons (columns g.coord\_1 and g.coord\_2)

**RI (retained intron):** genomic coordinates of retained intron (column g.coord\_1)

**ES (exon skipping):** genomic coordinates of skipped exon (column g.coord\_1)

| event.type | gene     | strand | g.coord_1                 | g.coord_2                 | GSCs                 |                 | GBM                  |                |
|------------|----------|--------|---------------------------|---------------------------|----------------------|-----------------|----------------------|----------------|
|            |          |        |                           |                           | inc.level.difference | FDR             | inc.level.difference | FDR            |
| ASS        | FAXDC2   | -      | chr5:154823307-154823592  | chr5:154823386-154823592  | 0.969                | 1.44E-12        | -0.011               | 0.7552485584   |
| ASS        | FUZ      | -      | chr19:49812446-49812736   | chr19:49812614-49812736   | 0.806                | 1.10E-09        | 0.002                | 0.03863816794  |
| ASS        | BTN3A3   | +      | chr6:26443366-26443442    | chr6:26443381-26443442    | 0.734                | 1.43E-05        | -0.006               | 1              |
| ASS        | INO80C   | -      | chr18:35487385-35487823   | chr18:35487385-35487439   | 0.679                | 3.18E-10        | 0.039                | 1              |
| ASS        | PSMG4    | +      | chr6:3264173-3264325      | chr6:3264208-3264325      | 0.676                | 6.14E-09        | 0.016                | 1              |
| ASS        | ULK3     | -      | chr15:74837750-74837798   | chr15:74837756-74837798   | 0.665                | 0               | 0.006                | 1              |
| ASS        | STIL     | -      | chr1:47312947-47313156    | chr1:47312947-47313021    | 0.653                | 0.002250382184  | 0.009                | 1              |
| ASS        | TSACC    | +      | chr1:156346767-156346995  | chr1:156346778-156346995  | 0.653                | 0.04759067616   | 0.132                | 1              |
| ASS        | EXOC7    | -      | chr17:76090328-76090481   | chr17:76090328-76090397   | 0.63                 | 5.30E-08        | -0.023               | 1              |
| ASS        | ZNF30    | +      | chr19:34926902-34927282   | chr19:34926902-34927216   | 0.619                | 6.09E-07        | -0.032               | 1              |
| ASS        | FUZ      | -      | chr19:49811362-49811491   | chr19:49811362-49811467   | 0.594                | 0.03982276621   | -0.034               | 6.05E-07       |
| ASS        | INPP4A   | +      | chr2:98555552-98555808    | chr2:98555552-98555691    | 0.57                 | 8.36E-05        | 0.108                | 5.73E-06       |
| ASS        | DAG1     | +      | chr3:49476848-49476905    | chr3:49476848-49476900    | 0.565                | 0.008667503029  | 0.02                 | 1              |
| ASS        | PHF20L1  | +      | chr8:132799082-132799172  | chr8:132799094-132799172  | 0.563                | 0.0003262237303 | -0.148               | 1              |
| ASS        | GPN3     | -      | chr12:110468125-110468264 | chr12:110468195-110468264 | 0.556                | 3.93E-06        | 0.099                | 0.9966788445   |
| ASS        | QKI      | +      | chr6:163564666-163570145  | chr6:163565945-163570145  | 0.545                | 3.14E-09        | -0.038               | 0.001031669967 |
| ASS        | KIAA1109 | +      | chr4:122334343-122334545  | chr4:122334343-122334440  | 0.543                | 0               | -0.036               | 5.72E-06       |
| ASS        | RCAN3    | +      | chr1:24502896-24503150    | chr1:24502896-24503117    | 0.534                | 0.01930630344   | 0.067                | 1              |
| ASS        | C21orf58 | -      | chr21:46314715-46315049   | chr21:46314715-46314880   | 0.528                | 0.01015531981   | -0.076               | 1              |
| ASS        | ATHL1    | +      | chr11:290657-291113       | chr11:290677-291113       | 0.517                | 2.86E-06        | -0.077               | 1              |
| ASS        | ITGA7    | -      | chr12:55700565-55701154   | chr12:55700898-55701154   | 0.513                | 3.83E-06        | -0.061               | 0.0449696624   |
| ASS        | C5orf45  | -      | chr5:179853196-179853437  | chr5:179853377-179853437  | 0.513                | 0.003083787964  | 0.018                | 1              |
| ASS        | FUZ      | -      | chr19:49812446-49812736   | chr19:49812637-49812736   | 0.508                | 1.43E-06        | 0.034                | 1              |
| ASS        | UBE2D3   | -      | chr4:102809067-102809184  | chr4:102809067-102809159  | 0.505                | 0.01254382835   | -0.003               | 1              |
| ASS        | CCHCR1   | -      | chr6:31157357-31157500    | chr6:31157384-31157500    | 0.498                | 6.71E-06        | -0.063               | 1              |
| ASS        | RASSF4   | +      | chr10:44983940-44984113   | chr10:44984021-44984113   | 0.491                | 4.71E-05        | 0.036                | 1              |
| ASS        | GAS5     | -      | chr1:173865470-173865547  | chr1:173865509-173865547  | 0.477                | 0               | -0.009               | 1              |
| ASS        | ZCWPW1   | -      | chr7:100419001-100419189  | chr7:100419110-100419189  | 0.476                | 0.0002101279767 | -0.078               | 1              |
| ASS        | HERC2P9  | +      | chr15:28655272-28655691   | chr15:28655272-28655420   | 0.469                | 0.0006755196922 | -0.007               | 1              |
| ASS        | TCTN1    | +      | chr12:110647195-110647336 | chr12:110647210-110647336 | 0.456                | 0.009968353808  | 0.059                | 1              |
| ASS        | ASB8     | -      | chr12:48150086-48150170   | chr12:48150086-48150140   | 0.454                | 0.01183865018   | 0.054                | 1              |
| ASS        | ATG16L2  | +      | chr11:72821547-72821741   | chr11:72821667-72821741   | 0.453                | 0.006062200051  | -0.067               | 1              |
| ASS        | CBWD5    | +      | chr9:65732946-65733122    | chr9:65732992-65733122    | 0.431                | 0.003471603937  | -0.016               | 1              |
| ASS        | TCF4     | -      | chr18:55232508-55232671   | chr18:55232520-55232671   | 0.431                | 5.01E-06        | 0.001                | 1              |
| ASS        | SMARCC2  | -      | chr12:56164302-56164731   | chr12:56164647-56164731   | 0.43                 | 1.46E-05        | 0.085                | 1.84E-11       |
| ASS        | PDLIM5   | +      | chr4:94575615-94576034    | chr4:94575942-94576034    | 0.428                | 1.38E-06        | 0.04                 | 0.676965413    |
| ASS        | ATP5O    | -      | chr21:33915135-33915724   | chr21:33915651-33915724   | 0.422                | 1.59E-05        | 0.028                | 1              |
| ASS        | RAD9A    | +      | chr11:67393690-67393790   | chr11:67393722-67393790   | 0.407                | 0.02636430401   | 0.002                | 1              |
| ASS        | CXorf23  | -      | chrX:19937417-19937532    | chrX:19937504-19937532    | 0.403                | 6.40E-06        | 0.042                | 1              |
| ASS        | ATG16L2  | +      | chr11:72821198-72821741   | chr11:72821667-72821741   | 0.398                | 0.00485576925   | -0.073               | 0.5324033143   |
| ASS        | PROCA1   | -      | chr17:28704306-28704616   | chr17:28704306-28704435   | 0.396                | 0.01603843118   | -0.126               | 0.01850640356  |
| ASS        | SUV420H1 | -      | chr11:68171231-68171296   | chr11:68171231-68171251   | 0.393                | 0.02228411796   | 0.017                | 1              |
| ASS        | PFN2     | -      | chr3:149964903-149966586  | chr3:149964903-149966264  | 0.392                | 0               | -0.026               | 0.07954730297  |
| ASS        | SNRPN    | +      | chr15:24974287-24974456   | chr15:24974310-24974456   | 0.392                | 2.09E-08        | 0.002                | 0.9902235134   |
| ASS        | ATP11A   | +      | chr13:112881812-112887168 | chr13:112881875-112887168 | 0.39                 | 0.001121865795  | 0.057                | 1              |
| ASS        | PTBP2    | +      | chr1:96804784-96804939    | chr1:96804799-96804939    | 0.389                | 0.03982276621   | 0.014                | 1              |
| ASS        | ABHD3    | -      | chr18:21663677-21664230   | chr18:21664117-21664230   | 0.388                | 4.71E-07        | 0.001                | 0.235248041    |
| ASS        | GIT2     | -      | chr12:109947255-109948846 | chr12:109947255-109947504 | 0.382                | 7.50E-05        | 0.036                | 0.1930077518   |
| ASS        | ERBB2    | +      | chr17:39694680-39695181   | chr17:39694987-39695181   | 0.372                | 0.03581629335   | 0.113                | 1              |
| ASS        | FAM193B  | -      | chr5:177523158-177523265  | chr5:177523162-177523265  | 0.368                | 0.004196039296  | 0.014                | 1              |
| ASS        | ENGASE   | +      | chr17:79081897-79082877   | chr17:79081897-79082063   | 0.365                | 1.43E-06        | 0.016                | 1              |
| ASS        | CEP70    | -      | chr3:138572858-138572984  | chr3:138572858-138572932  | 0.362                | 0.0004772283099 | -0.021               | 0.609275072    |
| ASS        | VPS28    | -      | chr8:144425874-144426063  | chr8:144425921-144426063  | 0.359                | 0.02683660206   | -0.049               | 1              |
| ASS        | CNOT2    | +      | chr12:70294070-70294294   | chr12:70294236-70294294   | 0.356                | 0.02871858636   | -0.068               | 1              |
| ASS        | PAAF1    | +      | chr11:73886928-73887099   | chr11:73887030-73887099   | 0.348                | 4.07E-05        | -0.031               | 1              |

|     |           |   |                           |                           |       |                 |        |                 |   |
|-----|-----------|---|---------------------------|---------------------------|-------|-----------------|--------|-----------------|---|
| ASS | GSKIP     | + | chr14:96379687-96379788   | chr14:96379687-96379755   | 0.343 | 0.0001836014068 | -0.047 |                 | 1 |
| ASS | FKBP1B    | + | chr2:24063018-24063681    | chr2:24063063-24063681    | 0.34  | 0.03680649749   | -0.043 | 0.653044201     |   |
| ASS | TTC31     | + | chr2:74483321-74483563    | chr2:74483321-74483410    | 0.336 | 0.006799172032  | 0.118  |                 | 1 |
| ASS | CACNA2D1  | - | chr7:81997178-81997250    | chr7:81997178-81997235    | 0.334 | 0.01823872704   | -0.038 |                 | 1 |
| ASS | HDLBP     | - | chr2:241269200-241269295  | chr2:241269205-241269295  | 0.332 | 0.02387795607   | 0.068  |                 | 1 |
| ASS | SSBP1     | + | chr7:141741748-141741798  | chr7:141741748-141741792  | 0.33  | 0.0005479620032 | 0.133  |                 | 1 |
| ASS | GEMIN8    | - | chrX:14026051-14026221    | chrX:14026139-14026221    | 0.327 | 3.93E-07        | -0.006 |                 | 1 |
| ASS | FAM111A   | + | chr11:59148703-59148953   | chr11:59148835-59148953   | 0.327 | 0.0004411870038 | -0.017 |                 | 1 |
| ASS | ECI2      | - | chr6:4117307-4119275      | chr6:4117307-4117451      | 0.327 | 2.46E-12        | 0.032  |                 | 1 |
| ASS | ARL13B    | + | chr3:93996547-93996684    | chr3:93996562-93996684    | 0.325 | 0.001110868338  | 0.033  |                 | 1 |
| ASS | SERHL2    | + | chr22:42571120-42571901   | chr22:42571120-42571203   | 0.324 | 1.14E-05        | -0.245 | 1.17E-12        |   |
| ASS | CERS5     | - | chr12:50132961-50134068   | chr12:50132961-50133064   | 0.323 | 1.11E-05        | 0.078  | 0.8570516629    |   |
| ASS | RAP1GAP   | - | chr1:21597960-21598095    | chr1:21597960-21598040    | 0.321 | 0.001576710913  | -0.056 | 0.5037900999    |   |
| ASS | BMP1      | + | chr8:22201117-22201928    | chr8:22201802-22201928    | 0.321 | 0.0003985755184 | 0.024  |                 | 1 |
| ASS | PANK4     | - | chr1:2510677-2510782      | chr1:2510677-2510748      | 0.32  | 0.004748089327  | -0.004 |                 | 1 |
| ASS | MSTO1     | + | chr1:155611688-155611852  | chr1:155611688-155611827  | 0.319 | 0.001671111688  | -0.063 |                 | 1 |
| ASS | AP1G2     | - | chr14:23564045-23564221   | chr14:23564045-23564159   | 0.319 | 0.0254485429    | -0.111 | 0.0005465986558 |   |
| ASS | SYNRG     | - | chr17:37596222-37596344   | chr17:37596222-37596341   | 0.311 | 4.07E-05        | -0.067 |                 | 1 |
| ASS | SERGEF    | - | chr11:18010070-18010139   | chr11:18010074-18010139   | 0.309 | 0.02139215565   | -0.06  |                 | 1 |
| ASS | HSF4      | + | chr16:67167719-67167947   | chr16:67167823-67167947   | 0.308 | 0.007648353669  | 0.027  |                 | 1 |
| ASS | DCUN1D4   | + | chr4:51886567-51887244    | chr4:51886567-51886638    | 0.307 | 0               | -0.022 | 0.01679940389   |   |
| ASS | ZNF740    | + | chr12:53181676-53182190   | chr12:53181676-53181992   | 0.305 | 4.35E-05        | 0.024  |                 | 1 |
| ASS | YY1AP1    | - | chr1:155668626-155668777  | chr1:155668626-155668717  | 0.304 | 8.73E-10        | -0.043 | 0.0380951098    |   |
| ASS | CLK4      | - | chr5:178619837-178620673  | chr5:178619837-178619896  | 0.302 | 4.40E-05        | 0.037  |                 | 1 |
| ASS | MOV10     | + | chr1:112699457-112699810  | chr1:112699684-112699810  | 0.302 | 2.09E-08        | -0.031 | 0.003361713201  |   |
| ASS | CPSF7     | - | chr11:61421053-61421130   | chr11:61421053-61421127   | 0.301 | 0.003195651006  | 0.054  |                 | 1 |
| ASS | OFD1      | + | chrX:13752703-13753441    | chrX:13753367-13753441    | 0.297 | 0.00566275157   | -0.103 | 0.1720331179    |   |
| ASS | RABL2B    | - | chr22:50769424-50769549   | chr22:50769454-50769549   | 0.296 | 0.03112961493   | 0.011  |                 | 1 |
| ASS | PLEKHH3   | - | chr17:42672085-42672392   | chr17:42672085-42672212   | 0.295 | 0.01358674745   | 0      |                 | 1 |
| ASS | CHD3      | + | chr17:7909142-7909384     | chr17:7909142-7909338     | 0.295 | 0.0002879218488 | -0.038 | 0.02484334521   |   |
| ASS | CDK11A    | - | chr1:1707408-1707584      | chr1:1707524-1707584      | 0.291 | 1.41E-10        | 0.091  | 0.0556495864    |   |
| ASS | ARL16     | - | chr17:81682442-81682675   | chr17:81682490-81682675   | 0.291 | 0.0003991287134 | 0.034  |                 | 1 |
| ASS | RNF181    | + | chr2:85597103-85597581    | chr2:85597444-85597581    | 0.288 | 0.007889084592  | 0.049  | 0.0484292929    |   |
| ASS | CTNND1    | + | chr11:57761796-57762119   | chr11:57761796-57762046   | 0.285 | 6.49E-09        | 0.009  | 0.02081041728   |   |
| ASS | METTL22   | + | chr16:8644528-8644725     | chr16:8644556-8644725     | 0.283 | 2.96E-05        | 0.019  |                 | 1 |
| ASS | OCIAD1    | + | chr4:48831226-48831433    | chr4:48831226-48831398    | 0.283 | 0.03335973344   | -0.027 |                 | 1 |
| ASS | PARP6     | - | chr15:72265269-72265473   | chr15:72265412-72265473   | 0.279 | 0               | 0      |                 | 1 |
| ASS | ZNF226    | + | chr19:44165587-44165807   | chr19:44165756-44165807   | 0.275 | 5.46E-06        | -0.088 | 0.0002121826412 |   |
| ASS | CHD3      | + | chr17:7907890-7908019     | chr17:7907893-7908019     | 0.274 | 0.005383440513  | -0.005 | 0.1664054621    |   |
| ASS | SLC37A3   | - | chr7:140351272-140351969  | chr7:140351272-140351451  | 0.273 | 2.09E-08        | -0.033 |                 | 0 |
| ASS | RPL17     | - | chr18:49491735-49491833   | chr18:49491745-49491833   | 0.271 | 0               | 0.022  | 0.1087311279    |   |
| ASS | ST3GAL6-A | - | chr3:98718418-98718521    | chr3:98718423-98718521    | 0.268 | 0.005488468139  | -0.099 |                 | 1 |
| ASS | TBC1D32   | - | chr6:121115171-121115747  | chr6:121115171-121115241  | 0.264 | 0.03686690828   | -0.023 |                 | 1 |
| ASS | BTA1F1    | + | chr10:91959064-91959282   | chr10:91959064-91959154   | 0.258 | 0               | -0.036 |                 | 1 |
| ASS | ZNF341    | + | chr20:33757147-33757343   | chr20:33757147-33757322   | 0.258 | 0.009675218226  | -0.068 |                 | 1 |
| ASS | PIF1      | - | chr15:64819846-64820019   | chr15:64819846-64819986   | 0.253 | 0.01652397872   | -0.094 |                 | 1 |
| ASS | ECI2      | - | chr6:4133548-4133711      | chr6:4133548-4133701      | 0.251 | 9.29E-07        | -0.007 |                 | 1 |
| ASS | NSFL1C    | - | chr20:1455713-1455870     | chr20:1455713-1455719     | 0.25  | 2.59E-08        | 0.011  |                 | 1 |
| ASS | ARHGAP26  | + | chr5:143207197-143207473  | chr5:143207197-143207308  | 0.25  | 0.0009743166039 | -0.078 | 0.09728090801   |   |
| ASS | POMZP3    | - | chr7:76611453-76611627    | chr7:76611453-76611591    | 0.25  | 0.02937565073   | -0.008 |                 | 1 |
| ASS | MTMR2     | - | chr11:95887611-95887759   | chr11:95887611-95887684   | 0.249 | 0.0002271937679 | -0.002 |                 | 1 |
| ASS | GAS8      | + | chr16:90031175-90031496   | chr16:90031298-90031496   | 0.247 | 0.01930354929   | -0.11  | 6.26E-06        |   |
| ASS | CDKN2AIP  | + | chr4:183445534-183445665  | chr4:183445534-183445634  | 0.247 | 4.13E-05        | 0.008  |                 | 1 |
| ASS | PPAPDC1B  | - | chr8:38268822-38268990    | chr8:38268881-38268990    | 0.244 | 0.0002493600206 | -0.037 | 0.000823726726  |   |
| ASS | ZMAT1     | - | chrX:101895813-101895882  | chrX:101895813-101895879  | 0.243 | 0.02099159975   | -0.095 |                 | 1 |
| ASS | MTRF1L    | - | chr6:152995135-152995319  | chr6:152995135-152995294  | 0.242 | 0.03082514448   | 0.001  |                 | 1 |
| ASS | C14orf159 | + | chr14:91215404-91215793   | chr14:91215404-91215556   | 0.236 | 0.03523702781   | 0      |                 | 1 |
| ASS | DNAJC10   | + | chr2:182739544-182740388  | chr2:182740298-182740388  | 0.235 | 0.00743209034   | -0.085 | 0.003064074245  |   |
| ASS | C11orf57  | + | chr11:112075566-112075684 | chr11:112075566-112075650 | 0.235 | 0.00395677552   | 0.024  |                 | 1 |
| ASS | KCTD9     | - | chr8:25439605-25439792    | chr8:25439605-25439664    | 0.234 | 0.00907788124   | -0.016 |                 | 1 |
| ASS | ZBTB8OS   | - | chr1:32634701-32634792    | chr1:32634767-32634792    | 0.234 | 0.03728001552   | 0.016  |                 | 1 |
| ASS | POMT1     | + | chr9:131509902-131510062  | chr9:131509902-131509996  | 0.233 | 0.008187538655  | -0.06  | 3.81E-06        |   |
| ASS | HUS1      | - | chr7:47979409-47979553    | chr7:47979420-47979553    | 0.233 | 0.01147637878   | 0.03   |                 | 1 |

|     |           |   |                           |                           |       |                 |        |                 |
|-----|-----------|---|---------------------------|---------------------------|-------|-----------------|--------|-----------------|
| ASS | THOC2     | - | chrX:123620374-123620965  | chrX:123620906-123620965  | 0.231 | 0               | -0.007 | 0.0003434966716 |
| ASS | FAM73B    | + | chr9:129068018-129068332  | chr9:129068197-129068332  | 0.231 | 7.43E-05        | 0.005  | 0.8570516629    |
| ASS | CNBP      | - | chr3:129171633-129171771  | chr3:129171654-129171771  | 0.231 | 5.77E-08        | 0.026  | 0.03863816794   |
| ASS | PSMA3-AS1 | - | chr14:58273978-58274135   | chr14:58273978-58274010   | 0.23  | 0.00508214036   | -0.052 | 0.7447194854    |
| ASS | C11orf74  | + | chr11:36594512-36594641   | chr11:36594512-36594592   | 0.226 | 6.34E-05        | -0.042 | 1               |
| ASS | DPH5      | - | chr1:101001466-101001587  | chr1:101001466-101001544  | 0.225 | 0.004661268084  | 0.009  | 1               |
| ASS | TMEM67    | + | chr8:93758482-93758576    | chr8:93758486-93758576    | 0.22  | 0.03659565077   | -0.017 | 1               |
| ASS | TPT1-AS1  | + | chr13:45377060-45377215   | chr13:45377139-45377215   | 0.22  | 0.00019763891   | 0.011  | 1               |
| ASS | GAA       | + | chr17:80101810-80101925   | chr17:80101810-80101890   | 0.217 | 0.0003941467045 | -0.026 | 0.2346365999    |
| ASS | ZMYM5     | - | chr13:19851354-19852190   | chr13:19851688-19852190   | 0.216 | 0.0009282013644 | -0.021 | 1               |
| ASS | CAMK2D    | - | chr4:113509637-113509675  | chr4:113509637-113509672  | 0.216 | 0.004100974342  | -0.108 | 0.0003760779331 |
| ASS | FAM111A   | + | chr11:59148796-59148953   | chr11:59148835-59148953   | 0.215 | 0.003383676778  | -0.02  | 1               |
| ASS | FUZ       | - | chr19:49812614-49812736   | chr19:49812637-49812736   | 0.214 | 0.0005034348025 | 0.026  | 0.003903921844  |
| ASS | UNKL      | - | chr16:1369933-1370357     | chr16:1370129-1370357     | 0.212 | 4.73E-05        | -0.009 | 1               |
| ASS | VPS54     | - | chr2:63981645-63981887    | chr2:63981645-63981851    | 0.212 | 0.02258460249   | -0.047 | 1               |
| ASS | SLC4A3    | + | chr2:219633854-219633979  | chr2:219633879-219633979  | 0.211 | 0.04759067616   | 0.002  | 1               |
| ASS | THNSL1    | + | chr10:25016657-25016789   | chr10:25016657-25016692   | 0.211 | 0.007391124316  | 0.12   | 1               |
| ASS | PBRM1     | - | chr3:52679573-52679726    | chr3:52679573-52679723    | 0.207 | 0.0011645449    | 0.016  | 1               |
| ASS | GAPVD1    | + | chr9:125321432-125321562  | chr9:125321432-125321499  | 0.203 | 0.0004619053114 | -0.065 | 0.05966462151   |
| ASS | SLC35B1   | - | chr17:49706203-49706334   | chr17:49706203-49706309   | 0.202 | 7.79E-06        | -0.01  | 1               |
| ASS | PFAS      | + | chr17:8266500-8266898     | chr17:8266752-8266898     | 0.201 | 0.009613703767  | -0.002 | 1               |
| ASS | ALG9      | - | chr11:111838248-111838399 | chr11:111838248-111838378 | 0.2   | 0.009557061151  | -0.027 | 0.2889115731    |
| ASS | ANAPC5    | - | chr12:121328315-121328497 | chr12:121328315-121328458 | 0.198 | 5.53E-11        | -0.087 | 0               |
| ASS | HOOK2     | - | chr19:12774560-12774741   | chr19:12774634-12774741   | 0.197 | 0.02371124663   | -0.037 | 1               |
| ASS | PKD1      | - | chr16:2105321-2105707     | chr16:2105321-2105474     | 0.196 | 0.02000335302   | -0.048 | 0.0009523146041 |
| ASS | SETD4     | - | chr21:36058815-36058973   | chr21:36058815-36058924   | 0.195 | 0.03505499569   | -0.023 | 1               |
| ASS | MPV17     | - | chr2:27312993-27313154    | chr2:27312993-27313074    | 0.194 | 0.01272076164   | -0.007 | 1               |
| ASS | MED24     | - | chr17:40020272-40020482   | chr17:40020272-40020353   | 0.193 | 4.61E-06        | -0.032 | 0               |
| ASS | CMC2      | - | chr16:80998284-80998473   | chr16:80998284-80998354   | 0.193 | 0.04069570644   | 0.025  | 1               |
| ASS | TIA1      | - | chr2:70216752-70216994    | chr2:70216885-70216994    | 0.191 | 1.98E-07        | -0.046 | 6.41E-05        |
| ASS | IRF3      | - | chr19:49661449-49662328   | chr19:49661947-49662328   | 0.191 | 0.003142933795  | 0.005  | 1               |
| ASS | LMBR1L    | - | chr12:49106510-49106746   | chr12:49106544-49106746   | 0.188 | 0.0004977651348 | 0.043  | 1               |
| ASS | ZC3HAV1   | - | chr7:139079103-139080243  | chr7:139079469-139080243  | 0.187 | 0.0002460105186 | -0.022 | 1               |
| ASS | DOCK10    | - | chr2:224805407-224805529  | chr2:224805407-224805502  | 0.187 | 0.004936945245  | 0.168  | 3.62E-06        |
| ASS | SDR39U1   | - | chr14:24442108-24442260   | chr14:24442177-24442260   | 0.186 | 0.002257648074  | -0.005 | 1               |
| ASS | CDK10     | + | chr16:89694568-89694788   | chr16:89694664-89694788   | 0.186 | 0.01220499947   | -0.026 | 0.02428250175   |
| ASS | NSUN5P1   | + | chr7:75415591-75415778    | chr7:75415591-75415770    | 0.186 | 0.02639140838   | -0.007 | 1               |
| ASS | PRKCSH    | + | chr19:11447692-11447789   | chr19:11447722-11447789   | 0.185 | 0.01102843369   | -0.013 | 1               |
| ASS | BRF1      | - | chr14:105219150-105219298 | chr14:105219150-105219232 | 0.185 | 0.001386479338  | 0.004  | 1               |
| ASS | RPP25L    | - | chr9:34611859-34612104    | chr9:34612063-34612104    | 0.183 | 0.008976958899  | -0.021 | 0.4656072724    |
| ASS | DPY19L3   | + | chr19:32467473-32468813   | chr19:32468730-32468813   | 0.183 | 0.02228411796   | -0.003 | 0.01410483595   |
| ASS | SETD5     | + | chr3:9434276-9434485      | chr3:9434333-9434485      | 0.181 | 0.002983828513  | 0.017  | 1               |
| ASS | FAM73B    | + | chr9:129067994-129068332  | chr9:129068197-129068332  | 0.18  | 0.003471603937  | 0.002  | 1               |
| ASS | STRN4     | - | chr19:46727451-46727567   | chr19:46727451-46727546   | 0.177 | 0.00157658726   | -0.085 | 1.23E-12        |
| ASS | TRIM33    | - | chr1:114397607-114397990  | chr1:114397607-114397860  | 0.173 | 0.0254485429    | 0.015  | 1               |
| ASS | MAPRE3    | + | chr2:27024095-27024297    | chr2:27024095-27024252    | 0.171 | 0.0008976924693 | 0.154  | 4.02E-12        |
| ASS | HAUS4     | - | chr14:22956745-22957094   | chr14:22956915-22957094   | 0.171 | 0.03020364092   | -0.028 | 0.0732778143    |
| ASS | C1orf112  | + | chr1:169804074-169804240  | chr1:169804111-169804240  | 0.17  | 0.003340729773  | -0.015 | 1               |
| ASS | KANK1     | + | chr9:732377-734835        | chr9:734747-734835        | 0.169 | 0.0005420927632 | 0.031  | 1               |
| ASS | FAM219B   | - | chr15:74904981-74905059   | chr15:74904981-74905039   | 0.169 | 0.01124910275   | 0.027  | 1               |
| ASS | APRT      | - | chr16:88809468-88809840   | chr16:88809468-88809706   | 0.167 | 1.57E-06        | 0.03   | 0.002294258572  |
| ASS | BICD1     | + | chr12:32337498-32337816   | chr12:32337498-32337706   | 0.166 | 0.04888897915   | -0.011 | 1               |
| ASS | WDR26     | - | chr1:224431476-224431581  | chr1:224431524-224431581  | 0.166 | 0.004296445586  | -0.029 | 0.4588527966    |
| ASS | SLC25A19  | - | chr17:75288497-75288591   | chr17:75288501-75288591   | 0.165 | 0.0007135351241 | -0.003 | 0.9595103662    |
| ASS | RNF216    | - | chr7:5739275-5739621      | chr7:5739275-5739352      | 0.164 | 2.09E-08        | -0.007 | 0.003577665493  |
| ASS | KIF2A     | + | chr5:62352587-62352710    | chr5:62352587-62352653    | 0.164 | 0.004282582856  | -0.039 | 0.6032882041    |
| ASS | USP33     | - | chr1:77721830-77721925    | chr1:77721830-77721901    | 0.164 | 0.03232140899   | 0.001  | 1               |
| ASS | ANK3      | - | chr10:60059339-60060006   | chr10:60059339-60059430   | 0.164 | 0.003617031386  | 0.24   | 7.50E-11        |
| ASS | NCOR2     | - | chr12:124327408-124327633 | chr12:124327546-124327633 | 0.164 | 0.02794282114   | -0.176 | 0               |
| ASS | SFSWAP    | + | chr12:131714070-131714240 | chr12:131714070-131714193 | 0.163 | 1.54E-07        | 0.007  | 1               |
| ASS | WHAMM     | + | chr15:82826387-82826496   | chr15:82826409-82826496   | 0.163 | 0.008521201378  | -0.016 | 1               |
| ASS | NUSAP1    | + | chr15:41350990-41351129   | chr15:41351032-41351129   | 0.162 | 0.0004781326667 | -0.005 | 1               |
| ASS | MSTO1     | + | chr1:155613656-155613766  | chr1:155613656-155613733  | 0.16  | 0.02717992751   | -0.057 | 0.3210570112    |

|     |            |   |                           |                           |       |                 |        |                 |
|-----|------------|---|---------------------------|---------------------------|-------|-----------------|--------|-----------------|
| ASS | IL17RC     | + | chr3:9923880-9924137      | chr3:9923880-9924020      | 0.159 | 0.01632096844   | -0.053 | 7.56E-09        |
| ASS | RP4-639F2C | + | chr1:94962924-94963270    | chr1:94962978-94963270    | 0.159 | 0.02193666938   | -0.018 | 1               |
| ASS | TJAP1      | + | chr6:43498922-43499100    | chr6:43498974-43499100    | 0.158 | 0.005932310734  | -0.025 | 0.1036896878    |
| ASS | SECISBP2   | + | chr9:89334521-89334730    | chr9:89334635-89334730    | 0.158 | 0.002486846193  | -0.014 | 1               |
| ASS | RAP1GAP    | - | chr1:21597960-21598064    | chr1:21597960-21598040    | 0.156 | 0.002071148324  | -0.018 | 1               |
| ASS | HECTD4     | - | chr12:112264083-112264212 | chr12:112264089-112264212 | 0.156 | 0.04804249068   | -0.051 | 1               |
| ASS | RBM6       | + | chr3:49967197-49968748    | chr3:49967469-49968748    | 0.154 | 0.02566195299   | 0.028  | 1               |
| ASS | HSF4       | + | chr16:67167460-67167599   | chr16:67167474-67167599   | 0.154 | 0.01065698785   | 0.002  | 1               |
| ASS | FOXRED1    | + | chr11:126273315-126273454 | chr11:126273338-126273454 | 0.153 | 0.02000335302   | -0.118 | 1               |
| ASS | ZSCAN26    | + | chr6:28271853-28272339    | chr6:28271853-28272336    | 0.153 | 0.004252062559  | -0.037 | 1               |
| ASS | CENPK      | - | chr5:65561462-65561564    | chr5:65561496-65561564    | 0.15  | 5.79E-06        | 0.002  | 1               |
| ASS | CYLD       | + | chr16:50749548-50750202   | chr16:50749575-50750202   | 0.149 | 0.001576710913  | -0.037 | 1               |
| ASS | MUTYH      | - | chr1:45332917-45333324    | chr1:45333284-45333324    | 0.149 | 0.03557564081   | 0.075  | 0               |
| ASS | DDIT3      | - | chr12:57517268-57517595   | chr12:57517268-57517424   | 0.149 | 0.0401411959    | -0.031 | 0.4700854447    |
| ASS | SMTN       | + | chr22:31088453-31088606   | chr22:31088512-31088606   | 0.149 | 0.00185771104   | -0.017 | 0.001441947888  |
| ASS | PROSER3    | + | chr19:35765033-35765176   | chr19:35765066-35765176   | 0.148 | 0.02479012398   | -0.042 | 1               |
| ASS | TMEM62     | + | chr15:43149028-43149151   | chr15:43149107-43149151   | 0.147 | 3.84E-05        | 0.004  | 1               |
| ASS | RMND1      | - | chr6:151436419-151436554  | chr6:151436445-151436554  | 0.147 | 0.009959142975  | -0.013 | 0.4403719306    |
| ASS | REPS1      | - | chr6:138926400-138930098  | chr6:138929976-138930098  | 0.146 | 2.51E-07        | -0.009 | 0               |
| ASS | ZDHHC4     | + | chr7:6577467-6577720      | chr7:6577467-6577498      | 0.146 | 0.007745721211  | 0.074  | 0.0006772200526 |
| ASS | SFT2D1     | - | chr6:166322856-166324595  | chr6:166322856-166322886  | 0.146 | 0.02088288316   | -0.007 | 1               |
| ASS | BPHL       | + | chr6:3138040-3140509      | chr6:3140385-3140509      | 0.145 | 0.004748089327  | -0.011 | 0.1581460708    |
| ASS | ANKRD10    | - | chr13:110900529-110900694 | chr13:110900529-110900661 | 0.144 | 0.0004438203268 | -0.049 | 1               |
| ASS | SDHAP1     | - | chr3:195965428-195965577  | chr3:195965428-195965542  | 0.143 | 0.00934947157   | -0.016 | 1               |
| ASS | SART3      | - | chr12:108544426-108544532 | chr12:108544426-108544478 | 0.142 | 0.000777512798  | -0.033 | 0.1930077518    |
| ASS | NDOR1      | + | chr9:137216066-137216188  | chr9:137216093-137216188  | 0.142 | 0.0008449208851 | -0.013 | 1               |
| ASS | PPP4R1L    | - | chr20:58240514-58240710   | chr20:58240514-58240610   | 0.14  | 0.04060591643   | -0.044 | 1               |
| ASS | TJAP1      | + | chr6:43498922-43499100    | chr6:43498977-43499100    | 0.139 | 0.0218019065    | -0.021 | 0.4092659801    |
| ASS | ZFAND2A    | - | chr7:1152906-1153241      | chr7:1152906-1153224      | 0.139 | 0.02999909818   | 0.001  | 1               |
| ASS | SNHG5      | - | chr6:85677794-85678032    | chr6:85677953-85678032    | 0.139 | 3.85E-07        | 0.158  | 2.28E-13        |
| ASS | ZNF76      | + | chr6:35290252-35290382    | chr6:35290265-35290382    | 0.138 | 0.002194122714  | -0.006 | 1               |
| ASS | MARK3      | + | chr14:103468032-103468186 | chr14:103468080-103468186 | 0.136 | 0.007114890212  | -0.042 | 0.02818569323   |
| ASS | FKBP10     | + | chr17:41819529-41820049   | chr17:41819529-41819675   | 0.136 | 0.003748982002  | -0.031 | 0               |
| ASS | DUXAP8     | + | chr22:15790660-15790798   | chr22:15790684-15790798   | 0.136 | 0.01002753622   | -0.095 | 1               |
| ASS | CNOT3      | + | chr19:54145541-54145817   | chr19:54145594-54145817   | 0.135 | 0.001111191173  | -0.038 | 0.0001534372107 |
| ASS | ATF6B      | - | chr6:32117036-32117130    | chr6:32117036-32117107    | 0.134 | 1.90E-05        | -0.019 | 4.89E-05        |
| ASS | C21orf2    | - | chr21:44334060-44335804   | chr21:44335757-44335804   | 0.133 | 0.025564861     | -0.022 | 0.0183057067    |
| ASS | CDK5RAP3   | + | chr17:47973518-47973693   | chr17:47973518-47973650   | 0.131 | 1.44E-06        | -0.03  | 0               |
| ASS | GALE       | - | chr1:23796508-23796782    | chr1:23796696-23796782    | 0.129 | 0.002262636209  | 0.186  | 0               |
| ASS | QKI        | + | chr6:163563419-163563719  | chr6:163563443-163563719  | 0.127 | 1.90E-05        | 0.02   | 0.01917737047   |
| ASS | UNC50      | + | chr2:98618145-98618515    | chr2:98618167-98618515    | 0.127 | 0.0003777090284 | -0.008 | 0.01434919428   |
| ASS | APBA2      | + | chr15:28921639-28921749   | chr15:28921639-28921718   | 0.126 | 0.001751023104  | 0.018  | 0.1786536796    |
| ASS | TECR       | + | chr19:14563140-14563257   | chr19:14563173-14563257   | 0.126 | 0.02150085512   | -0.006 | 1               |
| ASS | PAAF1      | + | chr11:73886928-73887099   | chr11:73887039-73887099   | 0.125 | 0.006867038563  | -0.045 | 1               |
| ASS | HSCB       | + | chr22:28743881-28743978   | chr22:28743881-28743923   | 0.124 | 0.0001921815736 | 0      | 1               |
| ASS | PABPC1L    | + | chr20:44938044-44938191   | chr20:44938060-44938191   | 0.124 | 0.009237124357  | 0.002  | 1               |
| ASS | C5orf45    | - | chr5:179853196-179853437  | chr5:179853377-179853437  | 0.124 | 0.001721902013  | -0.035 | 6.13E-10        |
| ASS | NUSAP1     | + | chr15:41350987-41351129   | chr15:41351032-41351129   | 0.123 | 0.000118969917  | -0.001 | 1               |
| ASS | NPHP3      | - | chr3:132692653-132693865  | chr3:132692653-132692818  | 0.122 | 3.53E-05        | 0.018  | 1               |
| ASS | TIMM17B    | - | chrX:48895351-48895501    | chrX:48895351-48895454    | 0.121 | 0.00750782119   | -0.001 | 1               |
| ASS | CCDC90B    | - | chr11:83273950-83274740   | chr11:83273950-83273992   | 0.12  | 0.005087330558  | 0.033  | 0.7861625944    |
| ASS | FUBP1      | - | chr1:77947452-77947552    | chr1:77947452-77947547    | 0.12  | 0.01033981784   | 0.011  | 1               |
| ASS | TPT1-AS1   | + | chr13:45390713-45390902   | chr13:45390757-45390902   | 0.12  | 1.61E-05        | 0.018  | 1               |
| ASS | ZNF664     | + | chr12:123973218-123973352 | chr12:123973218-123973303 | 0.12  | 0.0156075419    | 0.023  | 1               |
| ASS | IVD        | + | chr15:40407635-40407812   | chr15:40407635-40407725   | 0.119 | 0.00226146107   | -0.021 | 1.23E-14        |
| ASS | SLC37A3    | - | chr7:140352061-140352181  | chr7:140352061-140352146  | 0.119 | 0.001576710913  | -0.004 | 0.0001172081813 |
| ASS | BMP1       | + | chr8:22176923-22177139    | chr8:22176960-22177139    | 0.119 | 0.01003596905   | -0.076 | 5.14E-07        |
| ASS | CCS        | + | chr11:66605153-66605416   | chr11:66605338-66605416   | 0.119 | 0.03445710622   | -0.02  | 2.78E-07        |
| ASS | CLN6       | - | chr15:68211555-68211863   | chr15:68211674-68211863   | 0.117 | 0.0269999003    | -0.044 | 0               |
| ASS | NDUFAF7    | + | chr2:37241577-37241791    | chr2:37241577-37241637    | 0.116 | 0.00662797432   | -0.018 | 1               |
| ASS | CASC3      | + | chr17:40167370-40167612   | chr17:40167497-40167612   | 0.116 | 0.0001438215556 | 0.002  | 1               |
| ASS | RAB15      | - | chr14:64950578-64951151   | chr14:64951073-64951151   | 0.116 | 0.04917885074   | -0.006 | 0.1808345877    |
| ASS | PIGG       | + | chr4:521055-521273        | chr4:521055-521249        | 0.116 | 0.0004977651348 | -0.032 | 1               |

|     |          |   |                           |                           |        |                 |        |                 |
|-----|----------|---|---------------------------|---------------------------|--------|-----------------|--------|-----------------|
| ASS | SMC4     | + | chr3:160412325-160412849  | chr3:160412325-160412453  | 0.115  | 0               | -0.001 | 1               |
| ASS | CDK11A   | - | chr1:1722587-1722831      | chr1:1722707-1722831      | 0.114  | 0.006888488616  | -0.016 | 0.08616336822   |
| ASS | COX11    | - | chr17:54961118-54962915   | chr17:54961118-54961312   | 0.114  | 7.79E-06        | 0.11   | 0               |
| ASS | THOC2    | - | chrX:123610917-123610963  | chrX:123610917-123610957  | 0.113  | 0.002286623134  | 0.052  | 0.0007886757372 |
| ASS | C6orf48  | + | chr6:31836298-31836517    | chr6:31836423-31836517    | 0.113  | 0.03010599228   | -0.006 | 1               |
| ASS | JKAMP    | + | chr14:59486712-59486804   | chr14:59486730-59486804   | 0.112  | 0.0004772283099 | 0.038  | 0.06903160736   |
| ASS | ZNF655   | + | chr7:99561887-99562494    | chr7:99562367-99562494    | 0.111  | 0.02597407973   | -0.032 | 1               |
| ASS | C6orf48  | + | chr6:31836294-31836517    | chr6:31836423-31836517    | 0.111  | 0.02999909818   | -0.005 | 1               |
| ASS | ZNF596   | + | chr8:242886-243013        | chr8:242917-243013        | 0.109  | 0.02146154903   | -0.023 | 1               |
| ASS | IGSF8    | - | chr1:160091339-160091631  | chr1:160091339-160091608  | 0.108  | 0.01220499947   | -0.01  | 0.1785591081    |
| ASS | DNAJC17  | - | chr15:40776195-40776401   | chr15:40776195-40776292   | 0.106  | 4.68E-08        | -0.017 | 5.68E-07        |
| ASS | ENSA     | - | chr1:150627311-150627592  | chr1:150627466-150627592  | 0.106  | 0.02703202502   | 0.018  | 1               |
| ASS | PBRM1    | - | chr3:52587352-52587510    | chr3:52587352-52587435    | 0.106  | 0.007750127607  | 0.013  | 0.09767448422   |
| ASS | ZNF3     | - | chr7:100077228-100077433  | chr7:100077302-100077433  | 0.106  | 0.01848702629   | 0.014  | 1               |
| ASS | CACNB3   | + | chr12:48826244-48826518   | chr12:48826366-48826518   | 0.105  | 0.01216881001   | -0.02  | 3.16E-06        |
| ASS | KMT2C    | - | chr7:152156204-152156346  | chr7:152156204-152156274  | 0.104  | 0.001747876875  | -0.024 | 0.3652827441    |
| ASS | DNAJC10  | + | chr2:182739544-182740388  | chr2:182740298-182740388  | 0.104  | 0.0003718189421 | -0.04  | 4.59E-07        |
| ASS | ZBTB17   | - | chr1:15946153-15946316    | chr1:15946153-15946294    | 0.104  | 0.004732969007  | -0.007 | 1               |
| ASS | PEX1     | - | chr7:92501506-92502079    | chr7:92501506-92501673    | 0.104  | 0.0008732873205 | 0.036  | 1               |
| ASS | TAX1BP1  | + | chr7:27816348-27816520    | chr7:27816348-27816394    | 0.103  | 5.39E-05        | -0.017 | 0.05541473235   |
| ASS | MAP4K4   | + | chr2:101887087-101887261  | chr2:101887087-101887237  | -0.102 | 2.13E-07        | 0.031  | 1.16E-05        |
| ASS | TIMM17B  | - | chrX:48895351-48895972    | chrX:48895351-48895501    | -0.102 | 0.0463393071    | 0.005  | 1               |
| ASS | CENPK    | - | chr5:65554796-65554946    | chr5:65554796-65554898    | -0.103 | 0.004100974342  | -0.011 | 0.1356658922    |
| ASS | NUDT13   | + | chr10:73126634-73126827   | chr10:73126672-73126827   | -0.103 | 0.02810489556   | -0.113 | 1               |
| ASS | ST5      | - | chr11:8702571-8703611     | chr11:8702571-8702720     | -0.104 | 0.01220499947   | -0.005 | 1.01E-06        |
| ASS | FAM114A2 | - | chr5:154038292-154038434  | chr5:154038387-154038434  | -0.106 | 0.005638572567  | 0.024  | 1               |
| ASS | FZR1     | + | chr19:3534420-3534522     | chr19:3534420-3534513     | -0.106 | 0.006456856362  | 0.011  | 0.9931016041    |
| ASS | DCAF4    | + | chr14:72945883-72946027   | chr14:72945887-72946027   | -0.106 | 0.02566195299   | -0.01  | 1               |
| ASS | WHSC1    | + | chr4:1952751-1953524      | chr4:1953323-1953524      | -0.107 | 0.002824582625  | -0.007 | 0.1770369432    |
| ASS | RALGPS1  | + | chr9:127212943-127213049  | chr9:127212967-127213049  | -0.109 | 0.007750127607  | -0.008 | 1               |
| ASS | BPTF     | + | chr17:67945408-67946325   | chr17:67945408-67945896   | -0.11  | 0.00665733317   | 0.016  | 1               |
| ASS | RUSC1    | + | chr1:155326579-155327132  | chr1:155326897-155327132  | -0.112 | 0.01152357239   | -0.012 | 0.01001965199   |
| ASS | BDP1     | + | chr5:71541453-71541682    | chr5:71541456-71541682    | -0.113 | 0.01057437769   | 0.019  | 1               |
| ASS | FCHSD1   | - | chr5:141644858-141644942  | chr5:141644858-141644938  | -0.113 | 0.003195651006  | -0.013 | 1               |
| ASS | HNRNPH3  | + | chr10:68338502-68338687   | chr10:68338502-68338642   | -0.114 | 0.004040130954  | 0.002  | 1               |
| ASS | TRIM37   | - | chr17:59001597-59001741   | chr17:59001597-59001714   | -0.114 | 0.0003718189421 | -0.002 | 1               |
| ASS | SNHG8    | + | chr4:118278708-118279137  | chr4:118278708-118278792  | -0.114 | 0.0009901676837 | 0.045  | 0.8071787139    |
| ASS | ZC3H11A  | + | chr1:203796292-203796601  | chr1:203796292-203796496  | -0.116 | 0.03765181523   | 0.033  | 1               |
| ASS | MRRF     | + | chr9:122285168-122285946  | chr9:122285168-122285287  | -0.116 | 0.01403880967   | -0.002 | 0.253174273     |
| ASS | RECQL    | - | chr12:21501169-21501372   | chr12:21501169-21501215   | -0.117 | 0.02462972179   | 0.013  | 1               |
| ASS | RAP1GAP  | - | chr1:21602803-21603912    | chr1:21602803-21602913    | -0.117 | 7.66E-09        | -0.016 | 0.000110843787  |
| ASS | NAGK     | + | chr2:71072825-71073594    | chr2:71073481-71073594    | -0.117 | 0.0006627704568 | -0.025 | 0               |
| ASS | GUCD1    | - | chr22:24540437-24543100   | chr22:24540437-24543097   | -0.117 | 5.52E-06        | -0.005 | 0.9902235134    |
| ASS | SYVN1    | - | chr11:65132247-65132780   | chr11:65132731-65132780   | -0.118 | 0.02387795607   | 0.006  | 1               |
| ASS | XRN1     | - | chr3:142332374-142332531  | chr3:142332374-142332424  | -0.119 | 0.02871858636   | 0.012  | 1               |
| ASS | PXN      | - | chr12:120215102-120215417 | chr12:120215102-120215273 | -0.121 | 0.002194122714  | 0.093  | 0.09087061813   |
| ASS | RETSAT   | - | chr2:85345512-85346094    | chr2:85345974-85346094    | -0.122 | 0.001218214733  | -0.02  | 0               |
| ASS | GABPB1   | - | chr15:50301220-50301368   | chr15:50301256-50301368   | -0.122 | 0.02794282114   | 0.024  | 0.6345367851    |
| ASS | FAHD2A   | + | chr2:95410526-95411026    | chr2:95410526-95410586    | -0.122 | 0.04707260085   | 0.048  | 0.001080396776  |
| ASS | MTG1     | + | chr10:133401528-133402245 | chr10:133402148-133402245 | -0.122 | 0.01355011343   | -0.012 | 1               |
| ASS | PPP2R2D  | + | chr10:131943967-131944145 | chr10:131944094-131944145 | -0.123 | 0.0004132445768 | 0.022  | 0.002816004248  |
| ASS | DDX39B   | - | chr6:31540321-31540664    | chr6:31540321-31540534    | -0.123 | 0.000140885502  | -0.09  | 1.25E-06        |
| ASS | PARP14   | + | chr3:122720254-122721653  | chr3:122720254-122720388  | -0.124 | 0.009250039851  | -0.012 | 8.44E-09        |
| ASS | ZSCAN5A  | - | chr19:56314619-56314839   | chr19:56314680-56314839   | -0.126 | 0.02674759003   | -0.011 | 1               |
| ASS | MRPL55   | - | chr1:228108436-228109021  | chr1:228108954-228109021  | -0.126 | 0.001605495495  | -0.061 | 0.03088046436   |
| ASS | PSMD6    | - | chr3:64022642-64022801    | chr3:64022738-64022801    | -0.126 | 0.04120128176   | 0.005  | 1               |
| ASS | CASP8    | + | chr2:201266460-201266791  | chr2:201266486-201266791  | -0.127 | 0.002459197716  | -0.024 | 1               |
| ASS | SH3D19   | - | chr4:151176524-151176687  | chr4:151176533-151176687  | -0.127 | 0.001051640299  | 0.018  | 1               |
| ASS | TAF1D    | - | chr11:93736693-93737239   | chr11:93737063-93737239   | -0.127 | 1.32E-10        | 0.019  | 1               |
| ASS | ISG20    | + | chr15:88650234-88652310   | chr15:88652169-88652310   | -0.128 | 0.004538961798  | -0.111 | 0.2212579832    |
| ASS | HAUS8    | - | chr19:17059996-17060092   | chr19:17059996-17060089   | -0.131 | 0.04551241736   | -0.007 | 1               |
| ASS | RUSC1    | + | chr1:155326609-155327132  | chr1:155326897-155327132  | -0.131 | 0.01930354929   | -0.015 | 0.01418407996   |
| ASS | RYK      | - | chr3:134191848-134191983  | chr3:134191848-134191974  | -0.132 | 0.02228411796   | -0.021 | 1               |

|     |           |   |                           |                           |        |                 |        |                |   |
|-----|-----------|---|---------------------------|---------------------------|--------|-----------------|--------|----------------|---|
| ASS | CENPT     | - | chr16:67832227-67832545   | chr16:67832454-67832545   | -0.133 | 0.0002116162297 | 0.007  |                | 1 |
| ASS | SMARCA4   | + | chr19:11058254-11058363   | chr19:11058257-11058363   | -0.134 | 0.008425492765  | 0.027  | 0.1906372409   |   |
| ASS | BZW2      | + | chr7:16646130-16646304    | chr7:16646130-16646288    | -0.135 | 0.001551747794  | 0.024  |                | 1 |
| ASS | RREB1     | + | chr6:7181123-7181289      | chr6:7181123-7181246      | -0.136 | 0.005879821613  | 0.095  |                | 1 |
| ASS | IMPA2     | + | chr18:12012169-12012349   | chr18:12012169-12012215   | -0.136 | 0.02239688901   | -0.021 |                | 1 |
| ASS | PPT2-EGFL | + | chr6:32167086-32167257    | chr6:32167102-32167257    | -0.136 | 0.001225588831  | 0.032  | 1.85E-07       |   |
| ASS | ATG16L2   | + | chr11:72825301-72825407   | chr11:72825348-72825407   | -0.137 | 0.0003901111932 | -0.013 |                | 1 |
| ASS | PIDD1     | - | chr11:800984-801120       | chr11:801001-801120       | -0.139 | 0.01657875278   | -0.007 |                | 1 |
| ASS | UBE2D3    | - | chr4:102826484-102826844  | chr4:102826484-102826636  | -0.14  | 0.0326899352    | 0.027  | 0.4551225185   |   |
| ASS | RMND5B    | + | chr5:178138107-178138396  | chr5:178138107-178138258  | -0.141 | 0.03086650433   | -0.023 | 0.01044156558  |   |
| ASS | WDPCP     | - | chr2:63439756-63439871    | chr2:63439756-63439855    | -0.142 | 0.02937565073   | 0.047  |                | 1 |
| ASS | RPL7L1    | + | chr6:42880860-42881082    | chr6:42880860-42880966    | -0.144 | 0.0115195204    | 0      |                | 1 |
| ASS | HUWE1     | - | chrX:53543840-53543968    | chrX:53543885-53543968    | -0.145 | 0.04156987741   | -0.005 |                | 1 |
| ASS | CNOT8     | + | chr5:154858638-154858816  | chr5:154858638-154858768  | -0.145 | 0.004634626811  | -0.03  | 0.330382506    |   |
| ASS | RSRP1     | - | chr1:25243549-25244224    | chr1:25243549-25243633    | -0.146 | 0               | 0.025  |                | 1 |
| ASS | SLC22A17  | - | chr14:23347459-23347731   | chr14:23347513-23347731   | -0.149 | 0.00896509776   | -0.014 | 0.008337512171 |   |
| ASS | CPSF7     | - | chr11:61420469-61421608   | chr11:61421389-61421608   | -0.151 | 0.002518662501  | 0.039  | 7.21E-10       |   |
| ASS | SHKBP1    | + | chr19:40590729-40590853   | chr19:40590732-40590853   | -0.151 | 0.0151374011    | -0.001 |                | 1 |
| ASS | MSH5-SAPC | + | chr6:31761817-31761955    | chr6:31761817-31761865    | -0.151 | 4.80E-05        | -0.002 | 0.7085476287   |   |
| ASS | HMG3      | - | chr6:79202275-79202389    | chr6:79202316-79202389    | -0.153 | 4.51E-05        | -0.019 |                | 1 |
| ASS | ARHGEF1   | + | chr19:41892024-41892373   | chr19:41892330-41892373   | -0.155 | 0.006062200051  | 0.064  | 1.01E-08       |   |
| ASS | FAM208A   | - | chr3:56633043-56633966    | chr3:56633043-56633843    | -0.155 | 2.29E-06        | -0.007 |                | 1 |
| ASS | GPANK1    | - | chr6:31663852-31664580    | chr6:31663852-31664577    | -0.155 | 0.01713879478   | 0.039  | 0.3562912458   |   |
| ASS | NEDD1     | + | chr12:96907603-96907856   | chr12:96907603-96907624   | -0.158 | 0.0002711507675 | 0.047  |                | 1 |
| ASS | RAD51     | + | chr15:40695173-40695425   | chr15:40695173-40695321   | -0.159 | 0.0002455544809 | 0      |                | 1 |
| ASS | CEP78     | + | chr9:78251904-78252043    | chr9:78251907-78252043    | -0.161 | 0.02753281436   | -0.007 |                | 1 |
| ASS | FBNP1     | - | chr9:129923843-129923996  | chr9:129923843-129923939  | -0.161 | 0.007390962247  | -0.005 |                | 1 |
| ASS | MRPL43    | - | chr10:100983947-100984074 | chr10:100984033-100984074 | -0.163 | 0.005849655558  | -0.021 |                | 1 |
| ASS | PI4KAP1   | - | chr22:18547245-18547421   | chr22:18547245-18547373   | -0.163 | 0.01057437769   | 0.019  |                | 1 |
| ASS | ZCWPW1    | - | chr7:100415974-100416097  | chr7:100415974-100416094  | -0.165 | 0.04156779975   | 0.009  |                | 1 |
| ASS | PLEKHH3   | - | chr17:42670993-42671130   | chr17:42671002-42671130   | -0.166 | 0.0177309439    | -0.013 |                | 1 |
| ASS | PHF20L1   | + | chr8:132804611-132804740  | chr8:132804614-132804740  | -0.166 | 4.50E-06        | -0.017 |                | 1 |
| ASS | PRKCSH    | + | chr19:11447438-11447618   | chr19:11447438-11447597   | -0.166 | 0.03010377877   | -0.048 | 0.001154053307 |   |
| ASS | ANXA4     | + | chr2:69806384-69806498    | chr2:69806384-69806432    | -0.17  | 2.79E-05        | 0.005  |                | 1 |
| ASS | WSB1      | + | chr17:27307743-27309272   | chr17:27309099-27309272   | -0.171 | 0               | -0.089 | 0.002565534185 |   |
| ASS | KLC1      | + | chr14:103679383-103679545 | chr14:103679383-103679518 | -0.171 | 0.02000464033   | 0.046  | 0.08950478072  |   |
| ASS | ZNF596    | + | chr8:243721-243858        | chr8:243721-243805        | -0.172 | 0.001472187424  | 0.001  |                | 1 |
| ASS | INPP5B    | - | chr1:37931672-37932053    | chr1:37931912-37932053    | -0.173 | 3.09E-06        | -0.014 | 0.2820841183   |   |
| ASS | TCAIM     | + | chr3:44367455-44367708    | chr3:44367531-44367708    | -0.174 | 0.04017537365   | 0.007  |                | 1 |
| ASS | SGOL1     | - | chr3:20174248-20175055    | chr3:20175004-20175055    | -0.175 | 0.000404362015  | 0.034  | 0.1819771004   |   |
| ASS | PRPF38A   | + | chr1:52405679-52405839    | chr1:52405679-52405713    | -0.175 | 0.0001084941665 | 0.01   | 0.001810073749 |   |
| ASS | ZNF232    | - | chr17:5109393-5109868     | chr17:5109393-5109768     | -0.175 | 0.0004438203268 | 0.011  | 2.76E-05       |   |
| ASS | NOL8      | - | chr9:92324905-92325350    | chr9:92325305-92325350    | -0.176 | 1.63E-06        | -0.046 |                | 1 |
| ASS | CPEB2     | + | chr4:15007304-15007595    | chr4:15007304-15007586    | -0.18  | 0.0001514101156 | 0.014  |                | 1 |
| ASS | ZWINT     | - | chr10:56358804-56358947   | chr10:56358908-56358947   | -0.184 | 0.004634626811  | -0.013 |                | 1 |
| ASS | NPAS2     | + | chr2:100995399-100996055  | chr2:100995795-100996055  | -0.184 | 2.46E-05        | -0.038 | 0.2567807888   |   |
| ASS | DAP3      | + | chr1:155689090-155689243  | chr1:155689090-155689174  | -0.185 | 0               | 0.004  |                | 1 |
| ASS | TUBGCP4   | + | chr15:43403682-43403842   | chr15:43403682-43403799   | -0.187 | 7.91E-06        | -0.026 |                | 1 |
| ASS | CXorf38   | - | chrX:40639008-40640320    | chrX:40639008-40639128    | -0.188 | 0.000157290213  | -0.03  |                | 1 |
| ASS | TRIQQ     | - | chr8:92885319-92886735    | chr8:92885319-92886667    | -0.188 | 0.003596342349  | 0.044  | 0.08095202563  |   |
| ASS | NAA60     | + | chr16:3484698-3485083     | chr16:3484698-3485061     | -0.189 | 0.0002455544809 | 0.027  | 0.1856844325   |   |
| ASS | NAT9      | - | chr17:74773575-74773688   | chr17:74773575-74773685   | -0.19  | 0.00736127707   | 0.009  |                | 1 |
| ASS | DOCK1     | + | chr10:127012231-127012374 | chr10:127012294-127012374 | -0.194 | 6.31E-06        | -0.004 |                | 1 |
| ASS | MYO19     | - | chr17:36508896-36509135   | chr17:36509061-36509135   | -0.194 | 0.000193223543  | -0.034 | 0.001388486115 |   |
| ASS | COA1      | - | chr7:43650492-43650712    | chr7:43650611-43650712    | -0.196 | 0.007807705261  | -0.035 |                | 1 |
| ASS | SIPA1L1   | + | chr14:71704720-71705340   | chr14:71705221-71705340   | -0.198 | 1.76E-05        | 0.002  |                | 1 |
| ASS | FANCL     | - | chr2:58198578-58198662    | chr2:58198593-58198662    | -0.201 | 0.0001938388517 | 0.016  |                | 1 |
| ASS | KMT2A     | + | chr11:118471661-118474315 | chr11:118474178-118474315 | -0.201 | 3.34E-05        | -0.03  |                | 1 |
| ASS | CCHCR1    | - | chr6:31144628-31144788    | chr6:31144686-31144788    | -0.201 | 0.001143198533  | -0.005 |                | 1 |
| ASS | INTU      | + | chr4:127685441-127687867  | chr4:127687677-127687867  | -0.203 | 0.004053514847  | -0.119 | 0.0337448331   |   |
| ASS | ARID1A    | + | chr1:26772811-26772987    | chr1:26772814-26772987    | -0.205 | 0.0005909680069 | -0.003 |                | 1 |
| ASS | WDR31     | - | chr9:113330983-113331116  | chr9:113330983-113331113  | -0.206 | 0.02812554226   | -0.037 |                | 1 |
| ASS | MZF1      | - | chr19:58573054-58573575   | chr19:58573372-58573575   | -0.21  | 0.025564861     | -0.003 |                | 1 |



|     |            |   |                           |                           |        |                 |        |                |
|-----|------------|---|---------------------------|---------------------------|--------|-----------------|--------|----------------|
| ASS | ARPC1B     | + | chr7:99377337-99377455    | chr7:99377337-99377439    | -0.21  | 0.002309111532  | -0.015 | 1              |
| ASS | ADARB1     | + | chr21:45222017-45223577   | chr21:45222017-45222107   | -0.212 | 0.003150772569  | -0.032 | 1              |
| ASS | ZNF559     | + | chr19:9341616-9343843     | chr19:9341694-9343843     | -0.213 | 0.03031240378   | -0.048 | 0.2212579832   |
| ASS | NEO1       | + | chr15:73270009-73270233   | chr15:73270057-73270233   | -0.215 | 0.0001021511285 | -0.266 | 0              |
| ASS | CCDC66     | + | chr3:56566593-56566759    | chr3:56566593-56566740    | -0.215 | 0.001851714863  | 0.027  | 0.253174273    |
| ASS | RSRP1      | - | chr1:25244176-25245301    | chr1:25245149-25245301    | -0.218 | 0               | 0.029  | 1              |
| ASS | SLC52A2    | + | chr8:144358592-144359065  | chr8:144358592-144358900  | -0.218 | 0.003268335568  | 0.017  | 1              |
| ASS | KIAA0195   | + | chr17:75494626-75494808   | chr17:75494709-75494808   | -0.219 | 0.00121186621   | -0.016 | 1              |
| ASS | PRR13      | + | chr12:53443390-53443773   | chr12:53443540-53443773   | -0.219 | 3.86E-05        | -0.013 | 0.001193237389 |
| ASS | EFNA1      | + | chr1:155133502-155133780  | chr1:155133729-155133780  | -0.221 | 0.001140508688  | 0.036  | 1              |
| ASS | KLC1       | + | chr14:103679383-103679545 | chr14:103679383-103679518 | -0.222 | 0.002423306488  | 0.026  | 0.4847738017   |
| ASS | PRR13      | + | chr12:53443390-53443773   | chr12:53443486-53443773   | -0.223 | 8.78E-09        | -0.01  | 0.9902235134   |
| ASS | FAM208A    | - | chr3:56633043-56633966    | chr3:56633043-56633843    | -0.224 | 4.33E-06        | -0.001 | 1              |
| ASS | KB-1572G7. | - | chr22:23686830-23686995   | chr22:23686837-23686995   | -0.224 | 0.005345968046  | 0.008  | 1              |
| ASS | ISG20      | + | chr15:88650234-88652310   | chr15:88652109-88652310   | -0.225 | 0.0436367351    | -0.013 | 0              |
| ASS | PRR13      | + | chr12:53443486-53443773   | chr12:53443540-53443773   | -0.226 | 0.005572013596  | -0.029 | 0.06438414149  |
| ASS | SLC25A19   | - | chr17:75288387-75288591   | chr17:75288497-75288591   | -0.227 | 8.47E-05        | 0.009  | 0.7951186121   |
| ASS | TRIM69     | + | chr15:44758612-44758854   | chr15:44758620-44758854   | -0.228 | 0.0004772283099 | 0.02   | 1              |
| ASS | SENP6      | + | chr6:75640683-75640704    | chr6:75640686-75640704    | -0.229 | 0.03982276621   | 0.047  | 1              |
| ASS | TAZ        | + | chrX:154413206-154413358  | chrX:154413206-154413339  | -0.23  | 0.04391007992   | -0.036 | 1              |
| ASS | AURKA      | - | chr20:56392153-56392295   | chr20:56392167-56392295   | -0.231 | 0.02306657183   | 0.071  | 1              |
| ASS | BDH2       | - | chr4:103085348-103086540  | chr4:103086479-103086540  | -0.231 | 0.04209827853   | 0.024  | 0.3286128168   |
| ASS | Sep15      | - | chr1:86914027-86914424    | chr1:86914314-86914424    | -0.231 | 0               | 0.028  | 0              |
| ASS | NPHP1      | - | chr2:110164519-110164730  | chr2:110164687-110164730  | -0.238 | 0.0373288093    | -0.121 | 1              |
| ASS | SCAPER     | - | chr15:76771723-76771954   | chr15:76771741-76771954   | -0.241 | 0.006799172032  | -0.025 | 1              |
| ASS | BDH2       | - | chr4:103085698-103086540  | chr4:103086479-103086540  | -0.241 | 0               | 0.015  | 0.07530626706  |
| ASS | HACE1      | - | chr6:104777012-104777110  | chr6:104777012-104777097  | -0.242 | 0.01220499947   | 0.021  | 6.83E-08       |
| ASS | PACRGL     | + | chr4:20700457-20700747    | chr4:20700457-20700611    | -0.242 | 0.001751023104  | -0.066 | 0.009106652149 |
| ASS | FANCA      | - | chr16:89739128-89739289   | chr16:89739132-89739289   | -0.242 | 0.009715487683  | -0.003 | 1              |
| ASS | FAM122B    | - | chrX:134769566-134772283  | chrX:134769566-134771354  | -0.244 | 0               | -0.019 | 1              |
| ASS | ATG16L1    | + | chr2:233272965-233273777  | chr2:233272965-233273052  | -0.245 | 0.01938843415   | -0.046 | 0.00493616634  |
| ASS | C19orf66   | + | chr19:10091475-10091630   | chr19:10091583-10091630   | -0.246 | 0.006127776705  | -0.013 | 0.4633519523   |
| ASS | C9orf89    | + | chr9:93107673-93107827    | chr9:93107673-93107816    | -0.246 | 0.0003422060407 | -0.025 | 0.9166047911   |
| ASS | LAS1L      | - | chrX:65520701-65523707    | chrX:65523559-65523707    | -0.247 | 0               | -0.138 | 0              |
| ASS | DMAP1      | + | chr1:44213662-44213858    | chr1:44213708-44213858    | -0.247 | 0.003715223759  | -0.029 | 1              |
| ASS | CDK11A     | - | chr1:1719327-1719455      | chr1:1719357-1719455      | -0.248 | 0.0177309439    | -0.026 | 1              |
| ASS | BAHD1      | + | chr15:40465334-40465435   | chr15:40465343-40465435   | -0.252 | 0.000491510266  | 0.051  | 0.8460730171   |
| ASS | ARL6IP4    | + | chr12:122981570-122981879 | chr12:122981594-122981879 | -0.254 | 3.67E-10        | -0.021 | 0.3143760161   |
| ASS | R3HDM1     | + | chr2:135641535-135641790  | chr2:135641535-135641604  | -0.256 | 0.01629666727   | -0.04  | 0.5894882427   |
| ASS | NOP56      | + | chr20:2655933-2656214     | chr20:2655933-2656034     | -0.26  | 0               | -0.039 | 0.002273725252 |
| ASS | XRCC3      | - | chr14:103711465-103711661 | chr14:103711465-103711567 | -0.26  | 0.04859579048   | -0.014 | 1              |
| ASS | FNBP1      | - | chr9:129923843-129924026  | chr9:129923843-129923939  | -0.261 | 0.0001981096245 | -0.003 | 1              |
| ASS | VPS29      | - | chr12:110499456-110499546 | chr12:110499534-110499546 | -0.262 | 0.01416002077   | 0.02   | 1              |
| ASS | SLC35A2    | - | chrX:48904745-48905482    | chrX:48904745-48904892    | -0.268 | 0.003195651006  | -0.016 | 1              |
| ASS | CLPTM1L    | - | chr5:1331798-1331883      | chr5:1331802-1331883      | -0.269 | 8.36E-05        | 0.014  | 1              |
| ASS | AP4M1      | + | chr7:100101879-100102393  | chr7:100101879-100101968  | -0.269 | 0               | -0.015 | 1.56E-05       |
| ASS | ZNF711     | + | chrX:85246929-85247651    | chrX:85247546-85247651    | -0.271 | 7.29E-08        | -0.02  | 1              |
| ASS | ZNF641     | - | chr12:48347148-48347343   | chr12:48347251-48347343   | -0.276 | 0.03772791898   | 0.085  | 1              |
| ASS | RFC5       | + | chr12:118017689-118018053 | chr12:118017689-118017815 | -0.284 | 0.002352533445  | -0.077 | 0.5448320262   |
| ASS | ADCY6      | - | chr12:48773468-48774098   | chr12:48773468-48773647   | -0.286 | 0.002706536394  | 0.012  | 0.5681061732   |
| ASS | LIG1       | - | chr19:48120166-48121322   | chr19:48121169-48121322   | -0.288 | 0.02059523257   | -0.039 | 0.06844812466  |
| ASS | PNISR      | - | chr6:99403828-99404702    | chr6:99404602-99404702    | -0.289 | 8.34E-11        | 0.025  | 0.699386043    |
| ASS | C7orf50    | - | chr7:1138188-1138257      | chr7:1138217-1138257      | -0.289 | 1.25E-06        | 0.12   | 0.06516334069  |
| ASS | CDK13      | + | chr7:40092784-40093237    | chr7:40092964-40093237    | -0.292 | 4.03E-10        | 0.019  | 1              |
| ASS | B4GALT3    | - | chr1:161175807-161176095  | chr1:161175807-161176074  | -0.292 | 1.36E-05        | -0.167 | 0              |
| ASS | KIZ        | + | chr20:21205490-21205584   | chr20:21205490-21205530   | -0.295 | 0.01371813043   | 0.036  | 0.00973255938  |
| ASS | WDR83      | + | chr19:12670518-12670611   | chr19:12670562-12670611   | -0.299 | 0.04408854106   | -0.018 | 0.02042970593  |
| ASS | PARP2      | + | chr14:20344931-20345126   | chr14:20344931-20345087   | -0.299 | 1.33E-08        | -0.028 | 1              |
| ASS | PCBP1-AS1  | - | chr2:70083506-70083687    | chr2:70083537-70083687    | -0.299 | 0.004120571796  | -0.135 | 1              |
| ASS | NGLY1      | - | chr3:25736308-25737455    | chr3:25737333-25737455    | -0.3   | 0.00181880726   | 0.041  | 1              |
| ASS | ARHGEF40   | + | chr14:21075331-21075765   | chr14:21075331-21075499   | -0.301 | 0.001128835062  | 0.049  | 1.23E-14       |
| ASS | DPM1       | - | chr20:50941104-50941209   | chr20:50941128-50941209   | -0.303 | 0.01135523264   | -0.02  | 1              |
| ASS | ARL6IP4    | + | chr12:122981570-122981879 | chr12:122981594-122981879 | -0.303 | 5.86E-13        | -0.004 | 1              |

|     |           |   |                           |                           |        |                 |        |                 |
|-----|-----------|---|---------------------------|---------------------------|--------|-----------------|--------|-----------------|
| ASS | OPTN      | + | chr10:13109096-13109288   | chr10:13109111-13109288   | -0.305 | 0.02544833074   | -0.058 | 1               |
| ASS | PCID2     | - | chr13:113177610-113178008 | chr13:113177610-113177976 | -0.315 | 1.16E-07        | 0.027  | 0.5094209076    |
| ASS | TMEM214   | + | chr2:27037789-27037892    | chr2:27037814-27037892    | -0.32  | 0.0214154521    | -0.11  | 1               |
| ASS | NABP1     | + | chr2:191678135-191678705  | chr2:191678135-191678241  | -0.321 | 0.004867116873  | -0.001 | 1               |
| ASS | APTX      | - | chr9:32987543-32987846    | chr9:32987543-32987731    | -0.325 | 9.48E-06        | 0.002  | 1               |
| ASS | NDUFAF6   | + | chr8:95031994-95032098    | chr8:95031994-95032094    | -0.327 | 2.95E-05        | 0.015  | 1               |
| ASS | U2AF1L4   | - | chr19:35744322-35744981   | chr19:35744322-35744421   | -0.329 | 0.01277456951   | 0.102  | 0.01436035444   |
| ASS | RABL2B    | - | chr22:50782187-50782351   | chr22:50782187-50782347   | -0.333 | 0.02937565073   | 0.014  | 1               |
| ASS | TANGO2    | + | chr22:20021068-20021246   | chr22:20021068-20021134   | -0.336 | 0.002947582078  | 0.021  | 1               |
| ASS | PAM16     | - | chr16:4341367-4341672     | chr16:4341367-4341583     | -0.336 | 3.17E-05        | 0.048  | 0.0132344605    |
| ASS | BCS1L     | + | chr2:218660306-218660482  | chr2:218660306-218660421  | -0.338 | 0.009675218226  | 0.054  | 0.9201442443    |
| ASS | ADCY10P1  | + | chr6:41108948-41109904    | chr6:41109712-41109904    | -0.34  | 0.01505331047   | -0.042 | 1               |
| ASS | AURKB     | - | chr17:8207737-8207901     | chr17:8207737-8207840     | -0.343 | 0.007397341977  | -0.132 | 1               |
| ASS | U2AF1L4   | - | chr19:35744322-35744738   | chr19:35744322-35744421   | -0.35  | 0.004351922584  | 0.106  | 0.00613842183   |
| ASS | SUPT20H   | - | chr13:37022010-37023044   | chr13:37022010-37022317   | -0.36  | 2.00E-06        | -0.01  | 1               |
| ASS | PKMYT1    | - | chr16:2973137-2973253     | chr16:2973137-2973215     | -0.365 | 0.00200752727   | 0.074  | 0.0007379598445 |
| ASS | COMMD4    | + | chr15:75338061-75338420   | chr15:75338061-75338133   | -0.366 | 4.88E-11        | 0.041  | 0.01204700972   |
| ASS | RNF126    | - | chr19:651610-651855       | chr19:651691-651855       | -0.369 | 0.000119055682  | 0.062  | 0.0002124678132 |
| ASS | MSI2      | + | chr17:57674917-57675126   | chr17:57674971-57675126   | -0.372 | 0.009154824571  | -0.036 | 0.755732217     |
| ASS | MVD       | - | chr16:88656104-88656561   | chr16:88656104-88656304   | -0.376 | 0.01930354929   | -0.011 | 0.1256515688    |
| ASS | SH3BP2    | + | chr4:2831922-2832412      | chr4:2832330-2832412      | -0.38  | 0.01237140713   | 0.003  | 1               |
| ASS | RNF32     | + | chr7:156676294-156677130  | chr7:156676418-156677130  | -0.385 | 0.002902268724  | 0.184  | 1               |
| ASS | PKMYT1    | - | chr16:2973137-2973445     | chr16:2973137-2973215     | -0.386 | 4.25E-07        | 0.055  | 6.18E-06        |
| ASS | YPEL5     | + | chr2:30155814-30155910    | chr2:30155849-30155910    | -0.389 | 0.01033981784   | 0.012  | 1               |
| ASS | PRKAG1    | - | chr12:49005461-49005592   | chr12:49005461-49005543   | -0.39  | 0.01015531981   | 0.104  | 0.305961467     |
| ASS | LRRC75B   | - | chr22:24588213-24589393   | chr22:24588213-24588329   | -0.394 | 0.0009628756991 | 0.062  | 0.1959219425    |
| ASS | MINK1     | + | chr17:4890221-4890735     | chr17:4890516-4890735     | -0.395 | 0.004661268084  | -0.039 | 0.04915354714   |
| ASS | KAT6B     | + | chr10:74975398-74976330   | chr10:74975398-74975781   | -0.395 | 0.0009030718475 | 0.082  | 1               |
| ASS | ZNF286A   | + | chr17:15700047-15700366   | chr17:15700134-15700366   | -0.398 | 0.00692806339   | -0.06  | 1               |
| ASS | DDX51     | - | chr12:132141102-132141420 | chr12:132141274-132141420 | -0.411 | 2.38E-06        | -0.006 | 0.8632958686    |
| ASS | C19orf60  | + | chr19:18588994-18589683   | chr19:18588994-18589077   | -0.412 | 1.58E-07        | 0.013  | 0.1819771004    |
| ASS | IP6K2     | - | chr3:48715314-48715527    | chr3:48715388-48715527    | -0.414 | 0.03593330065   | 0.006  | 1               |
| ASS | DGKZ      | + | chr11:46368001-46368079   | chr11:46368004-46368079   | -0.423 | 0.0004772283099 | -0.012 | 1               |
| ASS | PLK3      | + | chr1:44804338-44804779    | chr1:44804338-44804501    | -0.426 | 0.0003250196594 | -0.002 | 1               |
| ASS | NDUFS5    | + | chr1:39026317-39026402    | chr1:39026317-39026398    | -0.427 | 0               | 0.034  | 0.2769346244    |
| ASS | CPM       | - | chr12:68933141-68933199   | chr12:68933169-68933199   | -0.431 | 0.01433723906   | -0.011 | 1               |
| ASS | NOL8      | - | chr9:92324905-92325350    | chr9:92325317-92325350    | -0.431 | 6.68E-05        | -0.076 | 1               |
| ASS | CPM       | - | chr12:68933141-68933202   | chr12:68933159-68933202   | -0.432 | 5.28E-05        | -0.003 | 1               |
| ASS | C9orf91   | + | chr9:114624135-114624459  | chr9:114624349-114624459  | -0.432 | 0.0004438203268 | -0.034 | 1               |
| ASS | MFF       | + | chr2:227328677-227328899  | chr2:227328677-227328789  | -0.434 | 2.24E-06        | 0.008  | 1               |
| ASS | PHB2      | - | chr12:6969955-6970068     | chr12:6969955-6970063     | -0.437 | 0.0001139561149 | -0.001 | 1               |
| ASS | TOP3B     | - | chr22:21975904-21976187   | chr22:21975980-21976187   | -0.44  | 0.001218214733  | -0.038 | 1               |
| ASS | CORO7-PAI | - | chr16:4341367-4341583     | chr16:4341367-4341504     | -0.44  | 3.17E-05        | -0.03  | 0.001056435653  |
| ASS | TAZ       | + | chrX:154419542-154419746  | chrX:154419542-154419623  | -0.441 | 3.46E-08        | 0.068  | 0.02235414444   |
| ASS | PBX4      | - | chr19:19570585-19570833   | chr19:19570686-19570833   | -0.442 | 0.02703202502   | -0.063 | 1               |
| ASS | FNBP1     | - | chr9:129923843-129924026  | chr9:129923843-129923996  | -0.447 | 0.0001222988585 | 0.006  | 1               |
| ASS | C18orf54  | + | chr18:54361642-54362431   | chr18:54361642-54361948   | -0.45  | 1.03E-08        | -0.002 | 1               |
| ASS | SLC25A14  | + | chrX:130340106-130340353  | chrX:130340106-130340344  | -0.453 | 0.0008521869982 | -0.067 | 1               |
| ASS | TLE2      | - | chr19:3019282-3019466     | chr19:3019282-3019463     | -0.457 | 0.002391964041  | -0.001 | 1               |
| ASS | EPB41     | + | chr1:28987430-28987905    | chr1:28987447-28987905    | -0.471 | 0.01505331047   | -0.249 | 1               |
| ASS | CLEC16A   | + | chr16:11003073-11003305   | chr16:11003073-11003257   | -0.473 | 4.65E-05        | 0.083  | 1               |
| ASS | C16orf93  | - | chr16:30759653-30759809   | chr16:30759653-30759724   | -0.478 | 0.02067176633   | -0.032 | 1               |
| ASS | CCDC24    | + | chr1:43993886-43993964    | chr1:43993889-43993964    | -0.492 | 0.02163235123   | 0.017  | 1               |
| ASS | NPHP1     | - | chr2:110163047-110163135  | chr2:110163047-110163132  | -0.498 | 0.003019796635  | 0.019  | 1               |
| ASS | TKT       | - | chr3:53237796-53237921    | chr3:53237796-53237820    | -0.501 | 1.07E-07        | 0.015  | 1               |
| ASS | HLA-A     | + | chr6:29944499-29944634    | chr6:29944499-29944616    | -0.528 | 0               | -0.009 | 0.663760545     |
| ASS | PAM16     | - | chr16:4341367-4341672     | chr16:4341367-4341504     | -0.529 | 6.69E-09        | -0.025 | 0.09247298319   |
| ASS | ZRANB2-AS | + | chr1:71237129-71237386    | chr1:71237129-71237195    | -0.531 | 0.0004010953459 | -0.109 | 1               |
| ASS | OSBPL3    | - | chr7:24834086-24834736    | chr7:24834485-24834736    | -0.543 | 5.35E-13        | 0.015  | 1               |
| ASS | NABP1     | + | chr2:191683289-191683804  | chr2:191683728-191683804  | -0.552 | 2.14E-10        | -0.097 | 1               |
| ASS | FOPNL     | - | chr16:15882948-15883048   | chr16:15882948-15883020   | -0.557 | 0.0005506993828 | -0.007 | 1               |
| ASS | QKI       | + | chr6:163565945-163566795  | chr6:163566720-163566795  | -0.573 | 0               | -0.041 | 0.2989539018    |
| ASS | AP4M1     | + | chr7:100101879-100102393  | chr7:100101879-100101989  | -0.585 | 3.09E-06        | -0.027 | 1               |

|     |            |   |                          |                          |        |                 |        |                 |
|-----|------------|---|--------------------------|--------------------------|--------|-----------------|--------|-----------------|
| ASS | PQBP1      | + | chrX:48897911-48898093   | chrX:48897911-48898082   | -0.587 | 1.43E-06        | -0.015 | 1               |
| ASS | SLC2A11    | + | chr22:23875084-23875241  | chr22:23875120-23875241  | -0.59  | 0.004351922584  | 0.008  | 1               |
| ASS | MGRN1      | + | chr16:4686258-4690974    | chr16:4688795-4690974    | -0.593 | 3.75E-10        | -0.042 | 8.72E-06        |
| ASS | ASIC1      | + | chr12:50076967-50077060  | chr12:50076967-50077049  | -0.594 | 0.0001836014068 | 0.127  | 1               |
| ASS | MTX1       | + | chr1:155210547-155212219 | chr1:155210547-155210627 | -0.6   | 0               | 0.121  | 3.06E-08        |
| ASS | C5orf42    | - | chr5:37139339-37142480   | chr5:37142309-37142480   | -0.611 | 9.22E-10        | 0.032  | 1               |
| ASS | C1orf159   | - | chr1:1090352-1091374     | chr1:1090352-1090428     | -0.65  | 0.01370844678   | 0.005  | 1               |
| ASS | NEK3       | - | chr13:52143914-52143987  | chr13:52143915-52143987  | -0.653 | 5.08E-05        | 0.222  | 1               |
| ASS | TANGO2     | + | chr22:20061529-20061706  | chr22:20061529-20061683  | -0.657 | 0.007874013691  | -0.024 | 0.8148565953    |
| ASS | NRM        | - | chr6:30690024-30690243   | chr6:30690046-30690243   | -0.66  | 7.95E-05        | -0.176 | 1               |
| ASS | CENPV      | - | chr17:16348615-16349333  | chr17:16348615-16348685  | -0.676 | 2.77E-12        | 0.058  | 0.5158640232    |
| ASS | SH3TC2     | - | chr5:149041415-149041617 | chr5:149041473-149041617 | -0.733 | 1.14E-08        | 0.06   | 1               |
| ASS | DZANK1     | - | chr20:18412645-18412853  | chr20:18412645-18412835  | -0.791 | 1.24E-12        | 0.025  | 1               |
| MXE | ARIH2      | + | chr3:48945135-48945181   | chr3:48961611-48961679   | 0.948  | 0               | 0.02   | 0.2684251991    |
| MXE | ATG13      | + | chr11:46630896-46630991  | chr11:46632322-46632459  | 0.851  | 2.25E-08        | -0.053 | 1               |
| MXE | ARIH2      | + | chr3:48922747-48922811   | chr3:48961611-48961679   | 0.828  | 0               | -0.01  | 1               |
| MXE | AGAP4      | - | chr10:45841652-45841687  | chr10:45844325-45844394  | 0.785  | 1.11E-09        | 0.034  | 1               |
| MXE | RP11-33B1  | + | chr4:119528739-119528789 | chr4:119550378-119550443 | 0.639  | 2.06E-07        | -0.037 | 0.8998473395    |
| MXE | NVL        | - | chr1:224232088-224232182 | chr1:224232894-224232972 | 0.615  | 0.000384726908  | -0.039 | 1               |
| MXE | SRGAP1     | + | chr12:64091275-64091378  | chr12:64091892-64091926  | 0.576  | 3.66E-10        | 0.247  | 1               |
| MXE | DOCK9      | - | chr13:98845328-98845372  | chr13:98845923-98845991  | 0.55   | 4.87E-08        | -0.002 | 1               |
| MXE | ANKRD36    | + | chr2:97198585-97198658   | chr2:97200452-97200525   | 0.529  | 2.35E-05        | 0.06   | 1               |
| MXE | FUZ        | - | chr19:49812250-49812335  | chr19:49812446-49812736  | 0.511  | 0.006041335787  | 0.014  | 1               |
| MXE | PCBP1-AS1  | - | chr2:70053730-70053792   | chr2:70055713-70055910   | 0.505  | 1.79E-07        | -0.072 | 0.7337601527    |
| MXE | OSBPL6     | + | chr2:178339671-178339764 | chr2:178344285-178344360 | 0.48   | 0.0001659601603 | 0.182  | 1               |
| MXE | SLC9B1     | - | chr4:102949256-102949427 | chr4:102989799-102989941 | 0.474  | 0.01001908489   | 0.108  | 1               |
| MXE | ERBB2IP    | + | chr5:66068876-66069020   | chr5:66072168-66072291   | 0.469  | 1.14E-05        | 0.032  | 1               |
| MXE | DOCK9      | - | chr13:98845328-98845372  | chr13:98845923-98846060  | 0.468  | 1.11E-09        | 0.004  | 1               |
| MXE | TNC        | - | chr9:115048259-115048532 | chr9:115059729-115060002 | 0.464  | 3.13E-05        | 0.026  | 0.4060670565    |
| MXE | DNM2       | + | chr19:10796060-10796199  | chr19:10797379-10797518  | 0.455  | 0               | 0.168  | 0               |
| MXE | RAPGEF1    | - | chr9:131604930-131605188 | chr9:131619050-131619209 | 0.455  | 2.38E-05        | 0.08   | 1               |
| MXE | ANXA2      | - | chr15:60390212-60390317  | chr15:60396150-60396427  | 0.449  | 0.04267432066   | 0.029  | 1               |
| MXE | WASF3      | + | chr13:26676548-26676724  | chr13:26680034-26680201  | 0.44   | 0               | -0.153 | 1.26E-05        |
| MXE | RP11-421L2 | + | chr1:101075394-101075716 | chr1:101077362-101077508 | 0.439  | 3.74E-08        | 0.105  | 7.02E-07        |
| MXE | NBPF26     | + | chr1:120834494-120834546 | chr1:120836516-120836568 | 0.438  | 0.03649123668   | 0.667  | 1               |
| MXE | AD000671.6 | - | chr19:35744625-35744738  | chr19:35745124-35745212  | 0.435  | 4.44E-14        | -0.083 | 0.002127710418  |
| MXE | TNC        | - | chr9:115048259-115048532 | chr9:115059729-115060002 | 0.416  | 5.63E-05        | 0.021  | 0.7244533484    |
| MXE | ADAP2      | + | chr17:30926826-30926918  | chr17:30931888-30931968  | 0.411  | 3.40E-05        | 0.007  | 1               |
| MXE | CNOT2      | + | chr12:70285399-70285586  | chr12:70294236-70294294  | 0.41   | 0.001318100309  | 0.017  | 1               |
| MXE | KLHDC1     | + | chr14:49725685-49725769  | chr14:49728925-49729009  | 0.409  | 0.001455592303  | 0.034  | 1               |
| MXE | PCBP1-AS1  | - | chr2:70053730-70053792   | chr2:70059642-70059680   | 0.407  | 4.02E-06        | 0.003  | 1               |
| MXE | ATAT1      | + | chr6:30642767-30643011   | chr6:30645894-30645974   | 0.4    | 0.0005709668944 | -0.143 | 0               |
| MXE | SLC26A11   | + | chr17:80220918-80221115  | chr17:80221547-80221794  | 0.399  | 0.0003818203054 | 0.015  | 0.9970477496    |
| MXE | PLEKHA4    | - | chr19:48839204-48839263  | chr19:48841148-48841310  | 0.396  | 0.01313028342   | -0.011 | 1               |
| MXE | MAP4K4     | + | chr2:101860824-101860986 | chr2:101863820-101864051 | 0.393  | 0               | 0.248  | 0               |
| MXE | PCBP1-AS1  | - | chr2:70053730-70053792   | chr2:70055655-70055910   | 0.392  | 5.67E-07        | -0.04  | 1               |
| MXE | POLE2      | - | chr14:49646569-49646694  | chr14:49646993-49647092  | 0.387  | 0.001174947873  | -0.116 | 1               |
| MXE | CCNYL1     | + | chr2:207733946-207734047 | chr2:207737410-207737446 | 0.386  | 4.44E-07        | 0.061  | 0.6835350824    |
| MXE | RP4-717I23 | - | chr1:93315148-93315269   | chr1:93318167-93318228   | 0.386  | 0.04922057688   | 0.035  | 1               |
| MXE | PCBP1-AS1  | - | chr2:70053730-70053792   | chr2:70055713-70055910   | 0.382  | 1.18E-06        | -0.056 | 1               |
| MXE | CPSF7      | - | chr11:61421053-61421127  | chr11:61421191-61421257  | 0.378  | 0.01173911421   | -0.014 | 1               |
| MXE | FAM228B    | + | chr2:24135118-24135187   | chr2:24167626-24167683   | 0.377  | 0.04707829882   | 0.018  | 1               |
| MXE | RPL9       | - | chr4:39456405-39456538   | chr4:39457585-39457681   | 0.37   | 0.007466712483  | 0.05   | 0.3088808078    |
| MXE | CRLS1      | + | chr20:6026170-6026238    | chr20:6028671-6028725    | 0.369  | 0.01002816107   | 0.056  | 1               |
| MXE | CAST       | + | chr5:96727488-96727530   | chr5:96729152-96729209   | 0.368  | 6.23E-14        | -0.003 | 1               |
| MXE | CCBL1      | - | chr9:128846679-128846859 | chr9:128847432-128847643 | 0.365  | 0.0009655421884 | 0.092  | 1               |
| MXE | TPM2       | - | chr9:35684731-35684807   | chr9:35685063-35685139   | 0.365  | 8.39E-13        | 0.005  | 1               |
| MXE | ZCWPW2     | + | chr3:28478813-28478931   | chr3:28492126-28492173   | 0.365  | 0.04454817012   | -0.019 | 1               |
| MXE | FBXO22     | + | chr15:75904490-75904629  | chr15:75913202-75913290  | 0.364  | 1.52E-09        | 0.01   | 1               |
| MXE | OGDH       | + | chr7:44647443-44647534   | chr7:44647656-44647759   | 0.363  | 0               | -0.046 | 1.20E-09        |
| MXE | OGDH       | + | chr7:44647443-44647534   | chr7:44647656-44647759   | 0.358  | 0               | -0.021 | 0.0001402925284 |
| MXE | PILRB      | + | chr7:100353372-100353483 | chr7:100353894-100354012 | 0.349  | 1.28E-10        | 0.034  | 0.7555031296    |
| MXE | IMMP1L     | - | chr11:31460625-31460714  | chr11:31473723-31473786  | 0.349  | 0.0002261884385 | -0.017 | 1               |

|     |            |   |                          |                          |       |                 |        |               |
|-----|------------|---|--------------------------|--------------------------|-------|-----------------|--------|---------------|
| MXE | ARIH2      | + | chr3:48927461-48927813   | chr3:48961611-48961679   | 0.349 | 0               | -0.005 | 1             |
| MXE | ARIH2      | + | chr3:48927461-48927813   | chr3:48961611-48961679   | 0.347 | 0               | -0.005 | 1             |
| MXE | TPM1       | + | chr15:63061197-63061273  | chr15:63061712-63061788  | 0.344 | 5.99E-12        | 0.08   | 1.35E-05      |
| MXE | FBXO22     | + | chr15:75904490-75904629  | chr15:75913202-75913290  | 0.343 | 4.51E-08        | 0.01   | 1             |
| MXE | HMG1       | - | chr21:39345829-39345958  | chr21:39347378-39347483  | 0.323 | 0               | 0.023  | 1             |
| MXE | CPSF7      | - | chr11:61421053-61421130  | chr11:61421191-61421257  | 0.32  | 0.0423514077    | -0.034 | 1             |
| MXE | PKD1P6     | - | chr16:15125690-15125807  | chr16:15127469-15127596  | 0.32  | 0.01727736852   | 0.003  | 1             |
| MXE | HMG1       | - | chr21:39345829-39345958  | chr21:39347378-39347478  | 0.316 | 0               | 0.01   | 1             |
| MXE | IFT88      | + | chr13:20625749-20625849  | chr13:20631015-20631102  | 0.315 | 2.93E-06        | -0.034 | 1             |
| MXE | ARIH2      | + | chr3:48927461-48927813   | chr3:48964918-48964982   | 0.314 | 0               | -0.007 | 1             |
| MXE | LINC01184  | - | chr5:127956803-127956921 | chr5:128061143-128061244 | 0.313 | 8.49E-05        | -0.032 | 0.291262272   |
| MXE | FAM228B    | + | chr2:24146929-24147086   | chr2:24167626-24167683   | 0.308 | 0.008954576075  | 0.007  | 1             |
| MXE | EPB41L2    | - | chr6:130870327-130870381 | chr6:130876673-130876775 | 0.306 | 0.002539822157  | 0.163  | 7.51E-11      |
| MXE | PIGP       | - | chr21:37069551-37069624  | chr21:37072144-37072310  | 0.304 | 6.45E-07        | 0.012  | 0.8697005245  |
| MXE | FAM208B    | + | chr10:5714134-5714207    | chr10:5717658-5717750    | 0.298 | 2.88E-06        | -0.034 | 1             |
| MXE | IKZF4      | + | chr12:56019317-56019415  | chr12:56023670-56023764  | 0.295 | 0.03038613536   | 0.106  | 1             |
| MXE | CDKL3      | - | chr5:134308573-134308727 | chr5:134312291-134312380 | 0.292 | 0.02648226135   | -0.01  | 0.9363930543  |
| MXE | CDKL3      | - | chr5:134308573-134308727 | chr5:134312291-134312380 | 0.291 | 0.02508081161   | -0.008 | 1             |
| MXE | MDM4       | + | chr1:204526359-204526434 | chr1:204537458-204537497 | 0.286 | 0.0001261302674 | -0.024 | 1             |
| MXE | PPIL3      | - | chr2:200882341-200882382 | chr2:200885261-200885343 | 0.286 | 0.004322405941  | -0.021 | 0.1276900912  |
| MXE | SPAST      | + | chr2:32098795-32098891   | chr2:32114637-32114825   | 0.281 | 5.89E-08        | 0.108  | 4.52E-10      |
| MXE | PICALM     | - | chr11:85983865-85983973  | chr11:85990249-85990399  | 0.281 | 0               | -0.014 | 0.00188858072 |
| MXE | RFWD2      | - | chr1:176136487-176136547 | chr1:176149005-176149074 | 0.28  | 0.005073756977  | 0.003  | 1             |
| MXE | ALG13      | + | chrX:111689086-111689197 | chrX:111708964-111709048 | 0.279 | 1.16E-05        | 0.041  | 1             |
| MXE | AC005154.6 | - | chr7:30576563-30576710   | chr7:30584710-30584808   | 0.278 | 0.02127345004   | 0.017  | 1             |
| MXE | NASP       | + | chr1:45594693-45594773   | chr1:45600384-45600457   | 0.277 | 0.03478906968   | -0.02  | 0.7249845197  |
| MXE | DAG1       | + | chr3:49470964-49471049   | chr3:49476848-49476905   | 0.277 | 0.03468750359   | 0.037  | 1             |
| MXE | PPIL3      | - | chr2:200882341-200882382 | chr2:200885261-200885367 | 0.277 | 0.03684497474   | -0.025 | 0.6695285476  |
| MXE | LSM14B     | + | chr20:62126225-62126439  | chr20:62127584-62127701  | 0.276 | 0.000694920693  | 0.096  | 1.02E-05      |
| MXE | SFI1       | + | chr22:31604308-31604404  | chr22:31604868-31604945  | 0.276 | 0.0008459114573 | -0.017 | 1             |
| MXE | SLC29A1    | + | chr6:44227262-44227342   | chr6:44229389-44229471   | 0.274 | 4.53E-11        | -0.03  | 1.01E-06      |
| MXE | GAS5       | - | chr1:173865509-173865547 | chr1:173865856-173866206 | 0.274 | 0               | -0.013 | 0.9066165008  |
| MXE | DCUN1D4    | + | chr4:51891759-51891851   | chr4:51899269-51899378   | 0.271 | 9.22E-05        | 0.008  | 1             |
| MXE | USP45      | - | chr6:99445796-99446463   | chr6:99464603-99464747   | 0.271 | 4.26E-07        | -0.023 | 1             |
| MXE | CTU2       | + | chr16:88707135-88707210  | chr16:88709937-88710016  | 0.271 | 0.005693884603  | -0.01  | 1             |
| MXE | FAM228B    | + | chr2:24146929-24147086   | chr2:24164197-24164335   | 0.271 | 0.01854545969   | 0.012  | 1             |
| MXE | FAM228B    | + | chr2:24146929-24147086   | chr2:24164197-24164335   | 0.263 | 0.01231089299   | 0.008  | 1             |
| MXE | ACTN4      | + | chr19:38710256-38710342  | chr19:38711275-38711361  | 0.262 | 4.35E-11        | 0.252  | 0             |
| MXE | TMEM241    | - | chr18:23368714-23368750  | chr18:23370215-23370261  | 0.262 | 0.0380235146    | -0.005 | 1             |
| MXE | FBXL2      | + | chr3:33297868-33297962   | chr3:33359282-33359357   | 0.262 | 0.01098908084   | -0.006 | 1             |
| MXE | ZMAT1      | - | chrX:101887197-101887304 | chrX:101895813-101895882 | 0.262 | 0.001875902704  | -0.058 | 1             |
| MXE | FAM228B    | + | chr2:24146929-24147086   | chr2:24167626-24167683   | 0.261 | 0.0408781115    | 0      | 1             |
| MXE | N4BP2      | + | chr4:40097226-40097569   | chr4:40100035-40100126   | 0.26  | 0.01590946898   | 0.164  | 1             |
| MXE | NFIC       | + | chr19:3381711-3382243    | chr19:3425105-3425177    | 0.258 | 0.0002641670792 | 0.011  | 1             |
| MXE | SUN1       | + | chr7:843340-843520       | chr7:848417-848615       | 0.258 | 0.0001492596994 | -0.075 | 8.72E-07      |
| MXE | SNHG17     | - | chr20:38422091-38422241  | chr20:38425934-38426052  | 0.256 | 5.21E-09        | 0.014  | 1             |
| MXE | ZNRD1-AS1  | - | chr6:30021666-30021761   | chr6:30034907-30035110   | 0.253 | 0.0004121135196 | 0.062  | 1             |
| MXE | SPAG9      | - | chr17:50975862-50975901  | chr17:50977107-50977221  | 0.251 | 0               | -0.001 | 1             |
| MXE | VEGFA      | + | chr6:43778459-43778536   | chr6:43782010-43782087   | 0.25  | 2.69E-06        | 0.022  | 0.854414688   |
| MXE | C2orf76    | - | chr2:119317465-119317503 | chr2:119321153-119321204 | 0.248 | 0.04224843685   | -0.043 | 0.2210888422  |
| MXE | GSN        | + | chr9:121281469-121281562 | chr9:121300055-121300126 | 0.247 | 2.72E-12        | 0.022  | 3.32E-06      |
| MXE | RABL2B     | - | chr22:50769454-50769552  | chr22:50775771-50775851  | 0.246 | 0.006656664683  | 0.005  | 1             |
| MXE | UBE3A      | - | chr15:25407066-25407137  | chr15:254008619-25408684 | 0.246 | 0.006838125131  | -0.011 | 1             |
| MXE | EIF4G3     | - | chr1:20997600-20997633   | chr1:21001198-21001312   | 0.242 | 1.39E-09        | 0.052  | 1             |
| MXE | PRDM2      | + | chr1:13773077-13773188   | chr1:13778417-13782831   | 0.242 | 3.35E-09        | 0.021  | 1             |
| MXE | ANKS3      | - | chr16:4726658-4726780    | chr16:4726978-4727177    | 0.242 | 0.04053130872   | -0.013 | 1             |
| MXE | SUZ12P1    | + | chr17:30743300-30743369  | chr17:30759490-30759539  | 0.242 | 8.81E-07        | 0.004  | 1             |
| MXE | AUP1       | - | chr2:74529131-74529282   | chr2:74529361-74529499   | 0.241 | 6.67E-09        | 0      | 1             |
| MXE | MSRB3      | + | chr12:65308528-65308655  | chr12:65326825-65326934  | 0.241 | 0.0416374328    | 0      | 1             |
| MXE | ACTN4      | + | chr19:38727945-38728026  | chr19:38728315-38728381  | 0.24  | 0               | 0.086  | 0             |
| MXE | TMEM161B   | - | chr5:88228444-88228528   | chr5:88240812-88240916   | 0.238 | 1.82E-06        | 0.001  | 1             |
| MXE | AUP1       | - | chr2:74529131-74529282   | chr2:74529361-74529499   | 0.237 | 1.56E-08        | -0.002 | 1             |
| MXE | C17orf62   | - | chr17:82447579-82447621  | chr17:82449173-82449292  | 0.236 | 0.003734037699  | 0.003  | 1             |

|     |            |   |                           |                           |       |                 |        |                 |
|-----|------------|---|---------------------------|---------------------------|-------|-----------------|--------|-----------------|
| MXE | HSCB       | + | chr22:28743881-28743923   | chr22:28751240-28751288   | 0.233 | 0.01546534984   | 0.029  | 0.859825515     |
| MXE | GAS5       | - | chr1:173865509-173865547  | chr1:173866176-173866206  | 0.233 | 0               | -0.008 | 1               |
| MXE | SEC24B     | + | chr4:109481676-109481781  | chr4:109491326-109491407  | 0.23  | 6.93E-08        | -0.058 | 0.0007635296406 |
| MXE | POP4       | + | chr19:29610408-29610457   | chr19:29611861-29611939   | 0.229 | 0.007333096958  | 0.015  | 0.9668803811    |
| MXE | PIGF       | - | chr2:46588074-46588179    | chr2:46591802-46591925    | 0.224 | 0.004271075024  | -0.094 | 6.72E-05        |
| MXE | LRP8       | - | chr1:53275630-53275753    | chr1:53280586-53280715    | 0.224 | 0.0304034326    | 0.032  | 0.8275904879    |
| MXE | TMEM161B   | + | chr5:88287435-88287622    | chr5:88410072-88410194    | 0.224 | 0.0129113373    | 0.101  | 0.0003093883312 |
| MXE | CENPO      | + | chr2:24793851-24793965    | chr2:24799674-24799844    | 0.222 | 3.30E-09        | 0.002  | 1               |
| MXE | DCTN6      | + | chr8:30164110-30164175    | chr8:30175084-30175190    | 0.221 | 0.01355535248   | 0.016  | 0.9854573988    |
| MXE | NBPF9      | - | chr1:149058924-149059097  | chr1:149062092-149062265  | 0.221 | 2.56E-05        | 0.02   | 0.3997409494    |
| MXE | MKKS       | - | chr20:10412529-10413931   | chr20:10420527-10420758   | 0.218 | 3.79E-12        | 0.027  | 0.01347495685   |
| MXE | ELOVL5     | - | chr6:53287861-53287942    | chr6:53290094-53290189    | 0.217 | 0.0009267743125 | -0.108 | 1               |
| MXE | PDE9A      | + | chr21:42731769-42731949   | chr21:42732069-42732124   | 0.216 | 0.004302566949  | 0.028  | 0.1385328075    |
| MXE | RP11-421L2 | + | chr1:101075394-101075716  | chr1:101083460-101083574  | 0.215 | 0.03685287948   | 0.014  | 1               |
| MXE | FBXL2      | + | chr3:33297868-33297962    | chr3:33364624-33364719    | 0.214 | 0.001031064798  | -0.014 | 1               |
| MXE | GAS5       | - | chr1:173865509-173865547  | chr1:173866527-173866567  | 0.214 | 6.74E-05        | -0.012 | 0.9763670398    |
| MXE | ZGRF1      | - | chr4:112589723-112589874  | chr4:112603523-112603697  | 0.213 | 0.0003964893019 | -0.05  | 1               |
| MXE | MTCL1      | + | chr18:8806892-8807060     | chr18:8812978-8813233     | 0.212 | 0.0002977314871 | 0.033  | 1               |
| MXE | ZGRF1      | - | chr4:112589723-112589874  | chr4:112603523-112603697  | 0.211 | 0.0006512876139 | -0.055 | 1               |
| MXE | ASPH       | - | chr8:61618977-61619019    | chr8:61633682-61633727    | 0.21  | 2.91E-07        | -0.055 | 0.000493692975  |
| MXE | ANKRD27    | - | chr19:32605834-32605954   | chr19:32607634-32607832   | 0.209 | 0.01128144421   | -0.017 | 1               |
| MXE | CKLF       | + | chr16:66558189-66558348   | chr16:66563121-66563217   | 0.209 | 1.40E-11        | 0.04   | 1.02E-05        |
| MXE | ZGRF1      | - | chr4:112589723-112589874  | chr4:112603523-112603697  | 0.206 | 0.0001070343972 | -0.064 | 1               |
| MXE | C11orf80   | + | chr11:66788159-66788269   | chr11:66796280-66796364   | 0.206 | 0.0005733001896 | -0.025 | 1               |
| MXE | GAS5       | - | chr1:173864674-173864704  | chr1:173865228-173865282  | 0.206 | 5.01E-11        | -0.009 | 1               |
| MXE | RPL21      | + | chr13:27253764-27253843   | chr13:27255241-27255354   | 0.205 | 0.006823004384  | 0.001  | 1               |
| MXE | RPL21      | + | chr13:27253764-27253843   | chr13:27255241-27255349   | 0.201 | 0.006700381109  | 0.007  | 1               |
| MXE | SLMAP      | + | chr3:57907883-57908006    | chr3:57909075-57909150    | 0.2   | 0.000440024471  | 0      | 1               |
| MXE | ZC3H11A    | + | chr1:203796450-203796601  | chr1:203801574-203801628  | 0.199 | 0.03537717391   | 0.089  | 1               |
| MXE | PGAP3      | - | chr17:39676613-39676755   | chr17:39684596-39684749   | 0.199 | 0.007333096958  | 0.008  | 0.02862868358   |
| MXE | COA1       | - | chr7:43656032-43656153    | chr7:43665657-43665722    | 0.198 | 1.72E-06        | -0.025 | 0.8598337163    |
| MXE | PCBP1-AS1  | - | chr2:70018014-70018131    | chr2:70051202-70051305    | 0.198 | 0.04071530613   | -0.019 | 1               |
| MXE | NBPF12     | + | chr1:146987953-146988126  | chr1:146989573-146989746  | 0.198 | 0.0001456783967 | 0      | 1               |
| MXE | PRKRIP1    | + | chr7:102395976-102396537  | chr7:102397619-102397698  | 0.196 | 0.0001029012069 | -0.018 | 0.1966846816    |
| MXE | RP11-73M1  | + | chr14:103574106-103574170 | chr14:103587273-103587364 | 0.194 | 4.96E-08        | 0.039  | 0.1026254872    |
| MXE | CFLAR      | + | chr2:201140356-201140439  | chr2:201145377-201145432  | 0.193 | 5.62E-06        | -0.007 | 1               |
| MXE | ZFAND5     | - | chr9:72359417-72359521    | chr9:72360109-72360221    | 0.191 | 1.68E-12        | -0.006 | 1               |
| MXE | KNSTRN     | + | chr15:40383227-40383322   | chr15:40386404-40386494   | 0.19  | 3.93E-05        | 0.003  | 1               |
| MXE | TNFSF12-TI | + | chr17:7559623-7559702     | chr17:7559845-7559893     | 0.19  | 0.006396217123  | -0.011 | 1               |
| MXE | MPHOSPH9   | - | chr12:123226287-123226351 | chr12:123227545-123227616 | 0.189 | 6.55E-07        | 0.039  | 1               |
| MXE | MPV17      | - | chr2:27312993-27313074    | chr2:27322447-27322522    | 0.188 | 3.87E-06        | -0.015 | 0.442229027     |
| MXE | CCDC15     | + | chr11:124993168-124993243 | chr11:125003866-125003959 | 0.188 | 0.0004781924829 | 0.007  | 1               |
| MXE | TNC        | - | chr9:115048259-115048532  | chr9:115064646-115064919  | 0.187 | 0.03274388609   | 0.042  | 0.2240421397    |
| MXE | XKR9       | + | chr8:70674817-70674899    | chr8:70680780-70681330    | 0.185 | 0.002440740444  | -0.053 | 1               |
| MXE | GIT2       | - | chr12:109947255-109947504 | chr12:109951211-109951316 | 0.184 | 0.0005428233416 | 0.004  | 1               |
| MXE | ACOX1      | - | chr17:75960214-75960375   | chr17:75973624-75973785   | 0.184 | 0.0006007034903 | -0.018 | 0.1839333804    |
| MXE | ZNF83      | - | chr19:52635065-52635153   | chr19:52655560-52655687   | 0.184 | 0.008711948191  | -0.046 | 0.238757624     |
| MXE | ARIH2      | + | chr3:48922747-48922811    | chr3:48945135-48945181    | 0.183 | 0.0001227177574 | -0.042 | 0.4385128411    |
| MXE | PCBP1-AS1  | - | chr2:70059642-70059680    | chr2:70083506-70083687    | 0.183 | 0.01562606437   | 0.016  | 1               |
| MXE | MFF        | + | chr2:227347225-227347384  | chr2:227352513-227352573  | 0.182 | 0.0003367841868 | 0.056  | 5.72E-05        |
| MXE | MPHOSPH9   | - | chr12:123226287-123226351 | chr12:123227462-123227572 | 0.18  | 1.39E-06        | 0.037  | 1               |
| MXE | GRB10      | - | chr7:50710874-50710990    | chr7:50755886-50756056    | 0.18  | 0.03407818423   | -0.003 | 1               |
| MXE | ACSL3      | + | chr2:222887829-222887888  | chr2:222900673-222900780  | 0.18  | 0.001419689146  | 0.043  | 1               |
| MXE | POP5       | - | chr12:120579513-120579597 | chr12:120581114-120581257 | 0.18  | 0.004097329756  | -0.003 | 1               |
| MXE | NUDT17     | + | chr1:145846012-145846196  | chr1:145846597-145846690  | 0.18  | 0.004181133627  | 0.034  | 1               |
| MXE | RNF19B     | - | chr1:32942251-32942459    | chr1:32944018-32944159    | 0.179 | 0.03033891155   | 0.005  | 1               |
| MXE | ABI1       | - | chr10:26755654-26755741   | chr10:26759061-26759235   | 0.179 | 0.001001354063  | 0.049  | 0.004433906038  |
| MXE | WNK1       | + | chr12:879572-880031       | chr12:880720-880999       | 0.178 | 3.96E-05        | -0.023 | 1               |
| MXE | SPAG1      | + | chr8:100213818-100213918  | chr8:100220278-100220431  | 0.178 | 0.03855224577   | -0.018 | 1               |
| MXE | ST7L       | - | chr1:112583971-112584126  | chr1:112591524-112591603  | 0.177 | 0.03649123668   | -0.005 | 1               |
| MXE | ALG13      | + | chrX:111689086-111689197  | chrX:111708026-111708393  | 0.177 | 2.24E-06        | 0.011  | 1               |
| MXE | NT5C3A     | - | chr7:33024038-33024108    | chr7:33026816-33026915    | 0.177 | 0.04140530147   | -0.01  | 1               |
| MXE | CAST       | + | chr5:96722638-96722698    | chr5:96729152-96729209    | 0.177 | 0.00121263946   | 0.035  | 0.4484738992    |

|     |            |   |                           |                           |       |                 |        |                 |
|-----|------------|---|---------------------------|---------------------------|-------|-----------------|--------|-----------------|
| MXE | ZGRF1      | - | chr4:112586444-112586583  | chr4:112603523-112603697  | 0.176 | 0.01943201436   | 0.022  | 1               |
| MXE | ANKRD39    | - | chr2:96848268-96848444    | chr2:96853400-96853604    | 0.176 | 0.03138932416   | -0.002 | 1               |
| MXE | RCL1       | + | chr9:4826857-4827033      | chr9:4833153-4833228      | 0.175 | 0.006396217123  | -0.019 | 1               |
| MXE | ACLY       | - | chr17:41896619-41896649   | chr17:41897748-41897839   | 0.174 | 2.86E-05        | -0.022 | 0.0470832219    |
| MXE | METTL6     | - | chr3:15414020-15414162    | chr3:15415497-15415583    | 0.174 | 0.02355341548   | -0.024 | 1               |
| MXE | FAM122B    | - | chrX:134781820-134781917  | chrX:134785885-134785947  | 0.173 | 0.003764948527  | -0.016 | 1               |
| MXE | COG7       | - | chr16:23418699-23418827   | chr16:23424748-23424947   | 0.173 | 0.04308153903   | 0      | 1               |
| MXE | DGUOK      | + | chr2:73946718-73946906    | chr2:73950584-73950732    | 0.172 | 0.0001474551712 | 0.057  | 2.75E-10        |
| MXE | MTHFD1L    | + | chr6:150887841-150887981  | chr6:150905649-150905761  | 0.172 | 0.001134691147  | 0.035  | 0.3570144628    |
| MXE | KIF21A     | - | chr12:39315931-39315970   | chr12:39318072-39318201   | 0.172 | 2.61E-06        | 0.125  | 2.28E-07        |
| MXE | AKIP1      | + | chr11:8911443-8911671     | chr11:8914825-8914930     | 0.172 | 0.0304034326    | 0.012  | 0.9920590038    |
| MXE | NUTM2A-AS1 | - | chr10:87246114-87246212   | chr10:87288441-87288495   | 0.172 | 1.51E-05        | -0.074 | 0.3277942775    |
| MXE | HAGH       | - | chr16:1819114-1819223     | chr16:1819896-1820014     | 0.171 | 1.72E-06        | 0.003  | 1               |
| MXE | DBR1       | - | chr3:138163777-138163858  | chr3:138167080-138167305  | 0.171 | 0.01047188361   | -0.048 | 0.1460140654    |
| MXE | GLS        | + | chr2:190913192-190913364  | chr2:190920214-190920248  | 0.17  | 0.0003834698295 | 0.058  | 1               |
| MXE | ABI1       | - | chr10:26755654-26755741   | chr10:26759061-26759238   | 0.17  | 0.0004781924829 | 0.05   | 0.0005222918194 |
| MXE | COMMD4     | + | chr15:75338061-75338133   | chr15:75338354-75338420   | 0.17  | 3.33E-07        | -0.017 | 0.0001138023157 |
| MXE | OGDH       | + | chr7:44645326-44645518    | chr7:44647656-44647759    | 0.168 | 0.002859687472  | -0.01  | 1               |
| MXE | ZNF655     | + | chr7:99561887-99561973    | chr7:99562367-99562494    | 0.168 | 0.01140485557   | 0.003  | 1               |
| MXE | HJURP      | - | chr2:233845727-233845820  | chr2:233847396-233847461  | 0.167 | 0.0009825921946 | 0.042  | 0.9535636341    |
| MXE | RELA       | - | chr11:65661686-65661835   | chr11:65661936-65662088   | 0.167 | 0.002859687472  | 0.006  | 1               |
| MXE | PGAP2      | + | chr11:3823612-3823740     | chr11:3823882-3824135     | 0.166 | 9.22E-05        | -0.018 | 4.55E-07        |
| MXE | ARIH2      | + | chr3:48924717-48924839    | chr3:48945135-48945181    | 0.166 | 1.09E-05        | -0.031 | 0.6250065823    |
| MXE | PCBP1-AS1  | - | chr2:70053730-70053792    | chr2:70083506-70083687    | 0.166 | 6.87E-06        | 0.009  | 1               |
| MXE | PCBP1-AS1  | - | chr2:70018014-70018131    | chr2:70051202-70051305    | 0.165 | 0.04040093942   | -0.022 | 1               |
| MXE | PPP4C      | + | chr16:30081258-30081310   | chr16:30082483-30082534   | 0.164 | 0.005808692927  | 0.029  | 0.001191643273  |
| MXE | CFLAR      | + | chr2:201140356-201140439  | chr2:201149002-201149052  | 0.163 | 2.56E-05        | -0.026 | 0.6534637752    |
| MXE | MYEF2      | - | chr15:48151472-48151571   | chr15:48151873-48151942   | 0.163 | 0.001055792768  | -0.024 | 0.8311654373    |
| MXE | DGUOK      | + | chr2:73946718-73946906    | chr2:73957124-73957240    | 0.163 | 3.19E-05        | 0.067  | 2.63E-14        |
| MXE | MBNL1      | + | chr3:152455541-152455577  | chr3:152456266-152456361  | 0.163 | 0.01194955016   | -0.004 | 1               |
| MXE | RANBP3     | - | chr19:5931418-5931531     | chr19:5932451-5932544     | 0.161 | 0.03047068983   | 0.002  | 1               |
| MXE | C5orf45    | - | chr5:179847977-179848066  | chr5:179853196-179853276  | 0.159 | 0.004780932254  | -0.003 | 0.443059214     |
| MXE | DGUOK      | + | chr2:73946718-73946906    | chr2:73957124-73957240    | 0.158 | 0.0002387901891 | 0.079  | 0               |
| MXE | BTF3L4     | + | chr1:52064824-52064938    | chr1:52083339-52083541    | 0.158 | 0.0002261884385 | 0.007  | 1               |
| MXE | DGUOK      | + | chr2:73938909-73939022    | chr2:73950584-73950732    | 0.157 | 0.00925802358   | 0.082  | 0               |
| MXE | NSMF       | - | chr9:137453055-137453180  | chr9:137453730-137453820  | 0.157 | 0.0007803381414 | 0.003  | 1               |
| MXE | TEX22      | + | chr14:105445417-105445511 | chr14:105449358-105449409 | 0.156 | 0.0001522249229 | -0.038 | 0.2537068609    |
| MXE | H2AFY      | - | chr5:135350822-135350913  | chr5:135352945-135353045  | 0.155 | 2.56E-09        | -0.054 | 0.1211480961    |
| MXE | PIGP       | - | chr21:37069551-37069624   | chr21:37072144-37072310   | 0.155 | 7.30E-07        | 0.008  | 0.3247655327    |
| MXE | LETMD1     | + | chr12:51052091-51052207   | chr12:51056143-51056245   | 0.154 | 0.03327346733   | 0.034  | 0.226484228     |
| MXE | UBE3A      | - | chr15:25407066-25407262   | chr15:25408619-25408684   | 0.154 | 0.01414466032   | -0.011 | 1               |
| MXE | GAS5       | - | chr1:173865509-173865547  | chr1:173865856-173865894  | 0.154 | 2.88E-11        | -0.01  | 1               |
| MXE | RP4-769N1  | + | chrX:102601879-102601977  | chrX:102639399-102639533  | 0.154 | 0.02227107106   | -0.011 | 1               |
| MXE | ACOT8      | - | chr20:45848449-45848675   | chr20:45855158-45855292   | 0.153 | 0.01128144421   | 0.023  | 0.03473123519   |
| MXE | CEP85L     | - | chr6:118491685-118491865  | chr6:118511297-118511415  | 0.153 | 0.04132591343   | 0.034  | 1               |
| MXE | STAU1      | - | chr20:49165996-49166285   | chr20:49174194-49174269   | 0.153 | 8.71E-08        | 0.047  | 0.00166323334   |
| MXE | PPIL3      | - | chr2:200882341-200882435  | chr2:200885261-200885367  | 0.153 | 1.17E-05        | -0.023 | 0.09285044144   |
| MXE | ATP2B1     | - | chr12:89627677-89627716   | chr12:89630504-89630645   | 0.152 | 0.007378547302  | 0.008  | 1               |
| MXE | DLG1       | - | chr3:197149742-197149796  | chr3:197161639-197161738  | 0.152 | 0.000188737718  | 0.008  | 1               |
| MXE | EED        | + | chr11:86257514-86257596   | chr11:86264171-86264263   | 0.151 | 0.003132359724  | 0.001  | 1               |
| MXE | FAM49B     | - | chr8:129904498-129904585  | chr8:129970942-129970995  | 0.151 | 0.001100968158  | 0.128  | 1.82E-10        |
| MXE | MPF        | + | chr2:227347225-227347384  | chr2:227352513-227352573  | 0.151 | 0.007663048107  | 0.048  | 0.0001226727659 |
| MXE | HMG1       | - | chr21:39348291-39348339   | chr21:39348421-39348577   | 0.151 | 0.03247308498   | -0.006 | 0.2194692576    |
| MXE | DLST       | + | chr14:74882590-74882624   | chr14:74885585-74885634   | 0.149 | 0.01029295253   | 0.02   | 1               |
| MXE | TTC13      | - | chr1:230936157-230936264  | chr1:230939385-230939496  | 0.149 | 4.98E-05        | -0.069 | 0.009095902606  |
| MXE | AP2A2      | + | chr11:977094-977224       | chr11:981197-981299       | 0.149 | 0.003517278317  | 0.005  | 1               |
| MXE | MAPT       | + | chr17:45971858-45971945   | chr17:45978374-45978440   | 0.149 | 0.0005296925756 | 0.056  | 2.63E-14        |
| MXE | BCL2L13    | + | chr22:17683213-17683321   | chr22:17702242-17702386   | 0.148 | 0.0002387901891 | -0.011 | 1               |
| MXE | PCBP1-AS1  | - | chr2:70053730-70053792    | chr2:70083537-70083687    | 0.148 | 5.92E-06        | 0.016  | 0.6302690865    |
| MXE | IRF3       | - | chr19:49660712-49660828   | chr19:49661947-49662328   | 0.146 | 0.02026289817   | 0.009  | 1               |
| MXE | SNX14      | - | chr6:85549722-85549879    | chr6:85557975-85558060    | 0.146 | 0.01475123239   | 0.006  | 1               |
| MXE | FAM49B     | - | chr8:129879596-129879789  | chr8:129896748-129896854  | 0.146 | 0.01128144421   | -0.042 | 1               |
| MXE | NSMF       | - | chr9:137452735-137452819  | chr9:137453055-137453180  | 0.146 | 4.68E-06        | 0.004  | 1               |

|     |          |   |                           |                           |       |                 |        |                 |
|-----|----------|---|---------------------------|---------------------------|-------|-----------------|--------|-----------------|
| MXE | PCNX     | + | chr14:70988566-70988699   | chr14:71009633-71009724   | 0.145 | 0.01152016078   | 0.002  | 1               |
| MXE | HJURP    | - | chr2:233844204-233844283  | chr2:233849762-233849859  | 0.145 | 0.0003822624243 | 0.005  | 1               |
| MXE | C6orf52  | - | chr6:10683186-10683232    | chr6:10686965-10687164    | 0.145 | 0.02470719013   | 0.014  | 1               |
| MXE | TMEM14B  | + | chr6:10749201-10749268    | chr6:10770076-10770204    | 0.143 | 0.04701157616   | 0.043  | 0.03497287862   |
| MXE | TMEM161A | - | chr19:19133129-19133210   | chr19:19134783-19134887   | 0.142 | 0.002295330497  | 0.003  | 1               |
| MXE | MTHFD1L  | + | chr6:150887844-150887981  | chr6:150905649-150905761  | 0.142 | 0.008350531521  | 0.027  | 0.7920307084    |
| MXE | DHTKD1   | + | chr10:12088985-12089255   | chr10:12091512-12091684   | 0.142 | 0.03547198855   | -0.001 | 1               |
| MXE | ATG10    | + | chr5:82164398-82164537    | chr5:82178489-82178587    | 0.141 | 0.04224761506   | 0.019  | 1               |
| MXE | PIGP     | - | chr21:37067261-37067380   | chr21:37072144-37072310   | 0.141 | 0.0001179796604 | 0.008  | 0.9584830328    |
| MXE | PHF7     | + | chr3:52422221-52422338    | chr3:52422759-52422881    | 0.14  | 0.00222168987   | 0.013  | 1               |
| MXE | ZRANB3   | - | chr2:135390801-135390820  | chr2:135504328-135504496  | 0.14  | 0.0369310243    | 0.015  | 1               |
| MXE | CAPN7    | + | chr3:15240753-15240853    | chr3:15245525-15245671    | 0.139 | 0.03674380634   | -0.021 | 0.7925114743    |
| MXE | POLL     | - | chr10:101582762-101582891 | chr10:101585861-101586156 | 0.139 | 0.03049002289   | 0.008  | 1               |
| MXE | PICALM   | - | chr11:85983865-85983973   | chr11:85990249-85990378   | 0.138 | 0               | -0.007 | 0.3621489362    |
| MXE | RAD1     | - | chr5:34911553-34911812    | chr5:34913469-34913578    | 0.137 | 8.28E-06        | 0.014  | 1               |
| MXE | LRRCC1   | + | chr8:85115374-85115584    | chr8:85124791-85124939    | 0.137 | 0.004174444603  | 0.038  | 0.8759998953    |
| MXE | CIZ1     | - | chr9:128187862-128187934  | chr9:128190328-128190444  | 0.137 | 0.0168551311    | 0.005  | 1               |
| MXE | EPS8     | - | chr12:15670855-15670923   | chr12:15681225-15681302   | 0.137 | 0.02834580514   | 0.02   | 1               |
| MXE | CRELD2   | + | chr22:49923233-49923317   | chr22:49924359-49924455   | 0.137 | 0.02184438566   | 0.005  | 1               |
| MXE | ARPC1B   | + | chr7:99376432-99376574    | chr7:99377357-99377455    | 0.136 | 0.001794772579  | -0.003 | 0.05702319254   |
| MXE | PMS2     | - | chr7:5978595-5978696      | chr7:5982823-5982991      | 0.135 | 0.03417749302   | -0.024 | 1               |
| MXE | LDLR     | + | chr19:11123173-11123344   | chr19:11128007-11128085   | 0.134 | 0.008448894889  | 0.009  | 1               |
| MXE | CASK     | - | chrX:41555599-41555635    | chrX:41557031-41557100    | 0.134 | 0.001407486282  | -0.043 | 0.0001035333759 |
| MXE | GRB10    | - | chr7:50732271-50732368    | chr7:50755886-50756056    | 0.133 | 0.003775870552  | 0.009  | 1               |
| MXE | DGUOK    | + | chr2:73938909-73939022    | chr2:73957124-73957240    | 0.133 | 0.00191291694   | 0.069  | 0               |
| MXE | THUMP2   | - | chr2:39768900-39769093    | chr2:39769709-39770119    | 0.133 | 2.96E-06        | 0.012  | 1               |
| MXE | SH3GLB2  | - | chr9:129010669-129010693  | chr9:129012235-129012298  | 0.133 | 0.02873734411   | 0.039  | 0.164683156     |
| MXE | RBM6     | + | chr3:50048244-50048319    | chr3:50054334-50054395    | 0.131 | 0.000205403459  | -0.011 | 1               |
| MXE | DYNC112  | + | chr2:171690146-171690263  | chr2:171692776-171692894  | 0.13  | 0.001121487013  | -0.02  | 0.3455800053    |
| MXE | MDC1     | - | chr6:30707565-30708357    | chr6:30711411-30711504    | 0.13  | 0.001143797693  | 0.015  | 0.946859693     |
| MXE | ACP1     | + | chr2:272036-272150        | chr2:272191-272305        | 0.13  | 0.01002816107   | -0.006 | 1               |
| MXE | KRIT1    | - | chr7:92235402-92236542    | chr7:92237666-92237759    | 0.128 | 0.006841950359  | -0.004 | 1               |
| MXE | MELK     | + | chr9:36589535-36589652    | chr9:36594627-36594771    | 0.128 | 0.004831103709  | -0.032 | 1               |
| MXE | STRN3    | - | chr14:30913523-30913657   | chr14:30929200-30929311   | 0.128 | 0.0001502871092 | -0.005 | 0.9587829415    |
| MXE | MELK     | + | chr9:36589535-36589652    | chr9:36594627-36594771    | 0.127 | 0.01013902407   | -0.038 | 1               |
| MXE | LETMD1   | + | chr12:51052091-51052207   | chr12:51055834-51056021   | 0.126 | 0.007378020695  | 0.034  | 0.04226380702   |
| MXE | ASCC3    | - | chr6:100848147-100848707  | chr6:100864063-100864214  | 0.126 | 0.01102991524   | 0.008  | 1               |
| MXE | P4HTM    | + | chr3:49004860-49005046    | chr3:49005776-49005867    | 0.126 | 0.03840447679   | -0.003 | 1               |
| MXE | POLL     | - | chr10:101582762-101582891 | chr10:101584601-101584919 | 0.125 | 0.02262017329   | 0.014  | 1               |
| MXE | P4HTM    | + | chr3:49004860-49005046    | chr3:49005717-49005867    | 0.125 | 0.03416242048   | 0.005  | 1               |
| MXE | QKI      | + | chr6:163534981-163535125  | chr6:163561981-163562069  | 0.124 | 2.92E-06        | 0.013  | 0.7253696346    |
| MXE | ESYT2    | - | chr7:158737047-158737179  | chr7:158739022-158739121  | 0.124 | 0.0006139817884 | -0.007 | 1               |
| MXE | DCTN6    | + | chr8:30164110-30164175    | chr8:30175084-30175190    | 0.123 | 2.03E-07        | 0.006  | 1               |
| MXE | MPDZ     | - | chr9:13113930-13114021    | chr9:13115247-13115334    | 0.123 | 0.04158436659   | 0.005  | 1               |
| MXE | SCP2     | + | chr1:52948008-52948080    | chr1:52950754-52950886    | 0.123 | 0.04701157616   | 0.002  | 1               |
| MXE | C6orf52  | - | chr6:10683186-10683232    | chr6:10686965-10687164    | 0.123 | 0.03336528488   | -0.015 | 1               |
| MXE | DCXR     | - | chr17:82036383-82036448   | chr17:82036543-82036643   | 0.123 | 0.007049774526  | -0.009 | 0.865728919     |
| MXE | DPY19L3  | + | chr19:32467473-32467626   | chr19:32468730-32468813   | 0.123 | 0.002975638097  | -0.009 | 0.01860732592   |
| MXE | GTSE1    | + | chr22:46326435-46326654   | chr22:46328687-46328889   | 0.122 | 0.006468149765  | -0.005 | 1               |
| MXE | HMGN1    | - | chr21:39347246-39347292   | chr21:39347378-39347478   | 0.122 | 0.02072749562   | -0.026 | 1               |
| MXE | POMGNT1  | - | chr1:46194552-46194651    | chr1:46194843-46194961    | 0.121 | 0.003915883207  | -0.022 | 0.0896573496    |
| MXE | TPM3     | - | chr1:154171412-154171488  | chr1:154172028-154172104  | 0.121 | 0               | 0.146  | 0               |
| MXE | DLG1     | - | chr3:197076585-197076685  | chr3:197081050-197081117  | 0.12  | 0.004195565611  | -0.032 | 0.6917497094    |
| MXE | XPO1     | - | chr2:61525491-61526521    | chr2:61533771-61533903    | 0.12  | 0               | -0.004 | 1               |
| MXE | KRTCAP2  | - | chr1:155169790-155169857  | chr1:155172564-155172892  | 0.12  | 6.32E-05        | 0.005  | 1               |
| MXE | MARK3    | + | chr14:103491776-103492034 | chr14:103498501-103498528 | 0.119 | 8.37E-10        | 0.031  | 0.0001760395163 |
| MXE | HMG20B   | + | chr19:3575539-3575660     | chr19:3576260-3576307     | 0.118 | 0.001067898129  | -0.003 | 1               |
| MXE | EED      | + | chr11:86250295-86250448   | chr11:86264171-86264263   | 0.118 | 4.38E-11        | -0.007 | 1               |
| MXE | C1orf50  | + | chr1:42767508-42767624    | chr1:42773562-42773649    | 0.118 | 0.0002590266131 | 0.029  | 0.2873861516    |
| MXE | MPHOSPH8 | - | chr12:123226287-123226351 | chr12:123227462-123227616 | 0.117 | 9.96E-07        | 0.021  | 1               |
| MXE | NOP56    | + | chr20:2655933-2656034     | chr20:2656400-2656549     | 0.117 | 1.38E-07        | 0.015  | 0.2786831776    |
| MXE | SLC6A8   | + | chrX:153693904-153694017  | chrX:153694203-153694267  | 0.117 | 0.04184520844   | 0.009  | 1               |
| MXE | POP5     | - | chr12:120579773-120579923 | chr12:120580995-120581257 | 0.117 | 3.96E-05        | -0.002 | 1               |

|     |           |   |                           |                           |        |                 |        |                 |
|-----|-----------|---|---------------------------|---------------------------|--------|-----------------|--------|-----------------|
| MXE | HLA-C     | - | chr6:31270209-31270485    | chr6:31271072-31271331    | 0.117  | 5.70E-06        | 0.019  | 1               |
| MXE | ALG13     | + | chrX:111708964-111709048  | chrX:111711674-111711725  | 0.116  | 0.03083217036   | -0.028 | 1               |
| MXE | PLAT      | - | chr8:42185080-42185158    | chr8:42187397-42187572    | 0.116  | 0.009587266545  | -0.002 | 1               |
| MXE | UBA2      | + | chr19:34430575-34430659   | chr19:34431860-34431931   | 0.116  | 0.0003332621248 | -0.03  | 0.01524426996   |
| MXE | RABEPK    | + | chr9:125220538-125220700  | chr9:125227909-125228059  | 0.116  | 0.004332221339  | 0.021  | 0.1005484389    |
| MXE | GUSB      | - | chr7:65976014-65976202    | chr7:65979833-65979911    | 0.116  | 0.02072749562   | 0.014  | 1               |
| MXE | ARPC1B    | + | chr7:99376432-99376574    | chr7:99377337-99377455    | 0.114  | 0.003775870552  | 0      | 0.06377427603   |
| MXE | CENPO     | + | chr2:24793851-24793965    | chr2:24799674-24799844    | 0.114  | 0.0008017307644 | -0.002 | 1               |
| MXE | HNRNPH1   | - | chr5:179620891-179621397  | chr5:179623036-179623164  | 0.114  | 2.46E-06        | -0.013 | 0.7854809476    |
| MXE | TALDO1    | + | chr11:755878-756002       | chr11:759008-759057       | 0.114  | 0.01128144421   | 0.005  | 1               |
| MXE | PMS2      | - | chr7:5982823-5982991      | chr7:5986758-5987620      | 0.113  | 0.0002590266131 | 0.003  | 1               |
| MXE | ETNK1     | + | chr12:22671271-22671355   | chr12:22673499-22673660   | 0.112  | 0.008574289804  | -0.001 | 1               |
| MXE | KIAA1429  | - | chr8:94530962-94531085    | chr8:94534838-94535007    | 0.112  | 0.02615574639   | -0.012 | 1               |
| MXE | CIB1      | - | chr15:90232218-90232327   | chr15:90233668-90233703   | 0.112  | 0.01287962329   | 0.017  | 0.3584000157    |
| MXE | TRAPPC3   | - | chr1:36139719-36139819    | chr1:36140068-36140166    | 0.111  | 0.01217057872   | -0.004 | 1               |
| MXE | KIAA1551  | + | chr12:31960776-31960871   | chr12:31980877-31985957   | 0.111  | 0.01001908489   | -0.023 | 1               |
| MXE | STAG3L5P1 | + | chr7:100338772-100338889  | chr7:100345864-100345968  | 0.111  | 0.00296195312   | 0.012  | 1               |
| MXE | RMDN3     | - | chr15:40738500-40738576   | chr15:40745119-40745259   | 0.11   | 0.007869364411  | -0.001 | 1               |
| MXE | ANAPC16   | + | chr10:72223887-72224056   | chr10:72230365-72230440   | 0.11   | 0.003363953235  | -0.007 | 1               |
| MXE | LUC7L3    | + | chr17:50737286-50737479   | chr17:50738136-50738199   | 0.109  | 5.64E-06        | -0.061 | 1               |
| MXE | AGPAT4    | - | chr6:161154148-161154310  | chr6:161165576-161165713  | 0.108  | 0.0006171062672 | -0.019 | 0.005268690489  |
| MXE | BCL2L13   | + | chr22:17688985-17689142   | chr22:17696140-17696210   | 0.108  | 0.001814591819  | 0.009  | 1               |
| MXE | CTSC      | - | chr11:88312387-88312554   | chr11:88334936-88335082   | 0.108  | 0.0247604586    | 0.021  | 0.771352608     |
| MXE | CHKA      | - | chr11:68074716-68074830   | chr11:68081403-68081457   | 0.108  | 0.02218226445   | -0.068 | 0.0005110467477 |
| MXE | RPS6KB2   | + | chr11:67431367-67431515   | chr11:67432355-67432492   | 0.108  | 0.0007294478413 | 0.058  | 0               |
| MXE | CUEDC2    | - | chr10:102423797-102423859 | chr10:102423995-102424178 | 0.107  | 0.001455705933  | 0.001  | 1               |
| MXE | ZGRF1     | - | chr4:112587279-112587929  | chr4:112603523-112603697  | 0.107  | 0.01126235261   | 0.026  | 1               |
| MXE | SOD1      | + | chr21:31663789-31663886   | chr21:31666448-31666518   | 0.107  | 0.000440024471  | 0.002  | 1               |
| MXE | TPT1-AS1  | + | chr13:45383090-45383235   | chr13:45389734-45389820   | 0.107  | 0.018188216     | -0.026 | 1               |
| MXE | RPS6KB2   | + | chr11:67431367-67431515   | chr11:67432352-67432492   | 0.107  | 0.0005752714278 | 0.057  | 0               |
| MXE | LUC7L3    | + | chr17:50737286-50737479   | chr17:50738140-50738199   | 0.106  | 4.40E-06        | -0.059 | 1               |
| MXE | FBXL4     | - | chr6:98917373-98917719    | chr6:98934761-98934879    | 0.106  | 0.001380734764  | -0.006 | 1               |
| MXE | B4GALT4   | - | chr3:119229846-119230244  | chr3:119236852-119237070  | 0.106  | 0.004953620754  | -0.008 | 1               |
| MXE | HNRNPH1   | - | chr5:179621241-179621397  | chr5:179623036-179623164  | 0.106  | 0.0002986804302 | -0.016 | 0.5513892917    |
| MXE | SLC38A9   | - | chr5:55656714-55656774    | chr5:55664692-55664863    | 0.106  | 0.02053550709   | 0.005  | 0.9214862729    |
| MXE | TLK1      | - | chr2:171028338-171028405  | chr2:171046173-171046362  | 0.105  | 0.01313028342   | 0.015  | 1               |
| MXE | DPH5      | - | chr1:100995109-100995149  | chr1:101001466-101001587  | 0.104  | 0.001814591819  | 0.003  | 1               |
| MXE | PPIL3     | - | chr2:200882341-200882435  | chr2:200885261-200885343  | 0.104  | 3.05E-06        | -0.016 | 0.001421949682  |
| MXE | CBWD1     | - | chr9:146101-146158        | chr9:151304-151427        | 0.103  | 0.02204786988   | -0.005 | 0.8649321474    |
| MXE | GSAP      | - | chr7:77329332-77329391    | chr7:77330238-77330367    | 0.103  | 0.0002698227188 | 0.022  | 1               |
| MXE | RABEPK    | + | chr9:125220538-125220700  | chr9:125227909-125228059  | 0.102  | 0.01742082734   | 0.01   | 1               |
| MXE | TFRC      | - | chr3:196075158-196075360  | chr3:196077063-196077122  | 0.101  | 0.001018090401  | -0.004 | 1               |
| MXE | ARNT      | - | chr1:150842423-150842468  | chr1:150846262-150846307  | 0.101  | 0.01126235261   | -0.043 | 0.3623723167    |
| MXE | C1orf43   | - | chr1:154213892-154213946  | chr1:154214456-154214574  | 0.101  | 0.001794772579  | 0.012  | 0.6985415487    |
| MXE | HMG2      | + | chr1:26473482-26473527    | chr1:26473702-26473817    | 0.101  | 5.39E-06        | 0.001  | 0.01181436369   |
| MXE | MRPL47    | - | chr3:179598674-179598771  | chr3:179601729-179601790  | -0.101 | 3.57E-10        | -0.005 | 1               |
| MXE | RPAIN     | + | chr17:5425970-5426299     | chr17:5428070-5428211     | -0.102 | 0.005830025374  | -0.016 | 1               |
| MXE | FIP1L1    | + | chr4:53399729-53399839    | chr4:53452919-53453133    | -0.103 | 0.0001310168527 | 0.007  | 1               |
| MXE | CCDC14    | - | chr3:123955842-123955965  | chr3:123956354-123956427  | -0.103 | 0.01001908489   | 0.044  | 0.6057130972    |
| MXE | LARP1     | + | chr5:154793594-154793723  | chr5:154793799-154794000  | -0.104 | 0.0001568303725 | -0.033 | 0.2190766925    |
| MXE | MVK       | + | chr12:109579801-109579946 | chr12:109581394-109581550 | -0.105 | 0.03891190073   | 0.006  | 1               |
| MXE | FAM92A1   | + | chr8:93709770-93709875    | chr8:93718674-93718788    | -0.105 | 0.006065508786  | -0.016 | 0.9582556869    |
| MXE | FAM221A   | + | chr7:23692182-23692253    | chr7:23698191-23698299    | -0.105 | 0.0006007034903 | -0.042 | 2.32E-06        |
| MXE | NSRP1     | + | chr17:30118079-30118173   | chr17:301363066-301363162 | -0.106 | 0.0001113518188 | 0.011  | 0.8547258525    |
| MXE | ACTR10    | + | chr14:58215204-58215284   | chr14:58219693-58219729   | -0.106 | 0.002706536064  | -0.007 | 1               |
| MXE | IGF2BP3   | - | chr7:23319137-23319254    | chr7:23342063-23342189    | -0.106 | 0.00699945538   | -0.029 | 1               |
| MXE | MOK       | - | chr14:102263545-102263616 | chr14:102278605-102278694 | -0.108 | 0.01710508937   | 0.025  | 1               |
| MXE | ARL14EP   | + | chr11:30330885-30331374   | chr11:30332865-30332993   | -0.109 | 0.03819192811   | -0.033 | 0.04351879584   |
| MXE | NDUFAF6   | + | chr8:95036370-95036494    | chr8:95040705-95040927    | -0.109 | 0.04341779919   | 0.047  | 0.01612042262   |
| MXE | CCDC66    | + | chr3:56563683-56564125    | chr3:56566593-56566740    | -0.109 | 0.0372602753    | 0.021  | 1               |
| MXE | STRADA    | - | chr17:63714005-63714108   | chr17:63726637-63726695   | -0.109 | 1.34E-05        | -0.047 | 2.28E-05        |
| MXE | CHEK2     | - | chr22:28695709-28695873   | chr22:28696900-28696987   | -0.111 | 0.008687271641  | 0.015  | 1               |
| MXE | USP53     | + | chr4:119235289-119235411  | chr4:119239217-119239903  | -0.112 | 0.02547112692   | 0.051  | 0.112898373     |



|     |            |   |                           |                           |        |                 |        |                |
|-----|------------|---|---------------------------|---------------------------|--------|-----------------|--------|----------------|
| MXE | SHMT1      | - | chr17:18333165-18333288   | chr17:18335558-18335675   | -0.112 | 0.0274075858    | -0.001 | 1              |
| MXE | SH3GLB2    | - | chr9:129012235-129012298  | chr9:129014410-129014503  | -0.113 | 5.31E-05        | -0.002 | 0.9066802714   |
| MXE | SLCO4A1-A  | - | chr20:62664923-62665497   | chr20:62665859-62666010   | -0.113 | 7.86E-06        | -0.042 | 5.69E-06       |
| MXE | HNRNPAB    | + | chr5:178209329-178209432  | chr5:178210131-178210272  | -0.114 | 1.43E-06        | -0.017 | 0.08268356326  |
| MXE | TACC3      | + | chr4:1723727-1723870      | chr4:1727707-1728787      | -0.115 | 0.001047468692  | -0.018 | 0.5328406679   |
| MXE | PSMA4      | + | chr15:78542176-78542219   | chr15:78542482-78542645   | -0.115 | 0.0002604984889 | -0.008 | 1              |
| MXE | GPD2       | + | chr2:156476097-156476207  | chr2:156496043-156496215  | -0.115 | 0.01261593438   | -0.029 | 1              |
| MXE | RP4-777O2' | - | chr7:30500535-30500681    | chr7:30524366-30524486    | -0.115 | 0               | -0.065 | 7.85E-08       |
| MXE | STX2       | - | chr12:130806981-130807090 | chr12:130808630-130808704 | -0.116 | 0.03649123668   | -0.027 | 1              |
| MXE | C17orf80   | + | chr17:73233219-73233325   | chr17:73235475-73236995   | -0.116 | 8.46E-06        | 0.014  | 1              |
| MXE | TPT1-AS1   | + | chr13:45379898-45380001   | chr13:45383090-45383235   | -0.116 | 0.03030437867   | 0      | 1              |
| MXE | PTTG1IP    | - | chr21:44856192-44856364   | chr21:44861162-44861271   | -0.116 | 0.0003146550775 | -0.004 | 1              |
| MXE | TBC1D5     | - | chr3:17508473-17508605    | chr3:17623848-17623913    | -0.117 | 0.03804740112   | -0.021 | 1              |
| MXE | SENPF      | - | chr3:101398860-101399055  | chr3:101417592-101417790  | -0.117 | 0.009790410867  | 0.011  | 1              |
| MXE | HNRNPAB    | + | chr5:178209329-178209447  | chr5:178210131-178210272  | -0.117 | 1.08E-07        | -0.017 | 0.03188244244  |
| MXE | SEC24C     | + | chr10:73751107-73751243   | chr10:73759621-73759794   | -0.118 | 0.03147663073   | 0.005  | 1              |
| MXE | THAP9-AS1  | - | chr4:82895691-82895724    | chr4:82897988-82898062    | -0.118 | 0.01323461605   | -0.054 | 0.8140679126   |
| MXE | SUMF2      | + | chr7:56074173-56074218    | chr7:56074585-56074736    | -0.12  | 4.97E-05        | -0.028 | 0.07792216463  |
| MXE | ZUFSP      | - | chr6:116660735-116660846  | chr6:116666633-116666912  | -0.12  | 0.03791778075   | 0.037  | 0.5922684338   |
| MXE | DPY19L4    | + | chr8:94756035-94756159    | chr8:94761699-94761834    | -0.12  | 0.01971974686   | 0.03   | 0.8433385351   |
| MXE | MTA1       | + | chr14:105445666-105445852 | chr14:105449358-105449409 | -0.12  | 9.90E-07        | -0.004 | 0.5868038912   |
| MXE | DIABLO     | - | chr12:122224511-122224644 | chr12:122224644-122224748 | -0.12  | 3.44E-11        | -0.009 | 0.6105059873   |
| MXE | FASTK      | - | chr7:151076912-151077027  | chr7:151077100-151077236  | -0.121 | 0.01029295253   | 0.004  | 1              |
| MXE | CCDC14     | - | chr3:123955842-123955965  | chr3:123956045-123956115  | -0.121 | 0.02785913751   | 0.003  | 1              |
| MXE | SIPA1L3    | + | chr19:38119305-38119882   | chr19:38130497-38130772   | -0.122 | 0.008360219703  | 0.007  | 1              |
| MXE | DONSON     | - | chr21:33583487-33583666   | chr21:33584589-33584768   | -0.122 | 0.0002959732077 | 0.033  | 0.1163465324   |
| MXE | PGAP2      | + | chr11:3811249-3811424     | chr11:3823612-3823740     | -0.123 | 0.004195565611  | 0.039  | 1.89E-05       |
| MXE | ERCC1      | - | chr19:45421177-45421393   | chr19:45423269-45423381   | -0.124 | 0.0008495928534 | -0.026 | 0.005620356807 |
| MXE | NDE1       | + | chr16:15651468-15651584   | chr16:15651930-15652050   | -0.124 | 0.03549421484   | 0.004  | 1              |
| MXE | AGTPBP1    | - | chr9:85681267-85681335    | chr9:85692688-85692813    | -0.124 | 0.0003822624243 | 0.032  | 1              |
| MXE | GBA        | - | chr1:155240629-155240717  | chr1:155241085-155241180  | -0.124 | 0.002845465673  | -0.008 | 0.9785565686   |
| MXE | CALU       | + | chr7:128754261-128754455  | chr7:128754528-128754722  | -0.125 | 0.0002985715716 | -0.036 | 3.80E-13       |
| MXE | AURKA      | - | chr20:56388311-56388506   | chr20:56388686-56388784   | -0.126 | 0.008758570512  | 0.01   | 1              |
| MXE | CCDC176    | + | chr14:74046059-74046130   | chr14:74047929-74048074   | -0.127 | 0.01977590355   | -0.093 | 1              |
| MXE | SDCCAG3    | - | chr9:136405117-136405202  | chr9:136405904-136405978  | -0.127 | 1.74E-05        | 0.01   | 0.8346712181   |
| MXE | FASTKD1    | - | chr2:169538012-169538141  | chr2:169540050-169540179  | -0.128 | 0.003836887588  | 0.003  | 1              |
| MXE | NCK2       | + | chr2:105855047-105855289  | chr2:105881327-105882049  | -0.129 | 0.0008495928534 | 0.004  | 1              |
| MXE | PMF1-BGLA  | + | chr1:156233627-156233728  | chr1:156236287-156236483  | -0.129 | 0.001301445097  | 0.004  | 1              |
| MXE | NDUFAF6    | + | chr8:95036301-95036494    | chr8:95040705-95040927    | -0.13  | 0.03547198855   | 0.036  | 0.04183150021  |
| MXE | TFDP1      | + | chr13:113610995-113611062 | chr13:113631622-113631744 | -0.13  | 0.0007625425829 | -0.02  | 0.03652199859  |
| MXE | CARD8      | - | chr19:48249522-48249633   | chr19:48249750-48249847   | -0.132 | 0.01479498131   | 0.009  | 1              |
| MXE | TRIQQ      | - | chr8:92921502-92921660    | chr8:92954405-92954564    | -0.132 | 1.64E-09        | -0.015 | 0.4796691057   |
| MXE | FAM228B    | + | chr2:24135118-24135187    | chr2:24164197-24164335    | -0.133 | 0.02193360829   | -0.007 | 1              |
| MXE | HDAC8      | - | chrX:72488932-72489041    | chrX:72495155-72495268    | -0.134 | 0.0247604586    | -0.012 | 1              |
| MXE | SAP30BP    | + | chr17:75703310-75703371   | chr17:75703807-75703859   | -0.134 | 0.01563724167   | 0      | 1              |
| MXE | MFF        | + | chr2:227342744-227342819  | chr2:227347225-227347384  | -0.134 | 2.19E-05        | -0.014 | 0.3929611123   |
| MXE | MOK        | - | chr14:102265822-102265912 | chr14:102278605-102278694 | -0.135 | 0.04446147507   | 0.034  | 1              |
| MXE | SH3D19     | - | chr4:151147921-151148186  | chr4:151149499-151149561  | -0.136 | 0.01943201436   | 0.025  | 1              |
| MXE | ELP2       | + | chr18:36138794-36138872   | chr18:36141136-36141201   | -0.137 | 8.74E-05        | 0.034  | 1.76E-11       |
| MXE | IFI27L1    | + | chr14:94100738-94100771   | chr14:94101813-94102059   | -0.137 | 0.02602007324   | -0.006 | 1              |
| MXE | PVT1       | + | chr8:127939507-127939676  | chr8:127983903-127984204  | -0.137 | 0.0001007016067 | -0.01  | 1              |
| MXE | OFD1       | + | chrX:13763744-13763855    | chrX:13767126-13767284    | -0.138 | 0.0004426164455 | 0.004  | 1              |
| MXE | FAM3A      | - | chrX:154511847-154511871  | chrX:154512822-154512936  | -0.138 | 0.0001121731905 | -0.007 | 1              |
| MXE | LPHN3      | + | chr4:61676825-61676935    | chr4:61732753-61733554    | -0.138 | 0.008473719203  | 0.016  | 1              |
| MXE | MARK2      | + | chr11:63903060-63903158   | chr11:63903985-63904147   | -0.139 | 0.04895904011   | 0.055  | 5.31E-07       |
| MXE | ZMYND8     | - | chr20:47236325-47236516   | chr20:47249286-47249439   | -0.139 | 0.005434224012  | 0.007  | 1              |
| MXE | RPAIN      | + | chr17:5426235-5426299     | chr17:5428070-5428211     | -0.139 | 2.66E-06        | -0.003 | 1              |
| MXE | SCAI       | - | chr9:124974174-124974276  | chr9:124975246-124975389  | -0.139 | 0.01228392512   | 0.036  | 1              |
| MXE | HPS5       | - | chr11:18311913-18312024   | chr11:18317750-18317907   | -0.14  | 0.03038613536   | -0.047 | 0.7408635736   |
| MXE | MSRA       | + | chr8:10207832-10207901    | chr8:10245103-10245223    | -0.14  | 5.58E-06        | -0.053 | 0              |
| MXE | RGL1       | + | chr1:183806374-183806485  | chr1:183847565-183847774  | -0.141 | 0.02946769912   | 0.021  | 0.9019539908   |
| MXE | RWDD3      | + | chr1:95244210-95244698    | chr1:95246541-95246657    | -0.142 | 0.006065508786  | -0.027 | 0.6016057985   |
| MXE | SEC24B     | + | chr4:109473003-109473186  | chr4:109481676-109481781  | -0.145 | 2.50E-06        | 0.042  | 0.01875358126  |

|     |            |   |                           |                           |        |                 |        |               |
|-----|------------|---|---------------------------|---------------------------|--------|-----------------|--------|---------------|
| MXE | FOXM1      | - | chr12:2865354-2865399     | chr12:2866392-2866521     | -0.146 | 7.70E-05        | -0.128 | 0             |
| MXE | TRPC1      | + | chr3:142736378-142736533  | chr3:142743484-142743586  | -0.146 | 0.006802253715  | 0.038  | 1             |
| MXE | PAQR3      | - | chr4:78920533-78920681    | chr4:78923856-78923947    | -0.147 | 0.03575113456   | 0.018  | 1             |
| MXE | PXN        | - | chr12:120215559-120215661 | chr12:120216272-120217116 | -0.148 | 0.002279950226  | 0.015  | 1             |
| MXE | LRP8       | - | chr1:53271027-53271153    | chr1:53271226-53271346    | -0.148 | 0.006052763706  | -0.019 | 1             |
| MXE | ANKRD11    | - | chr16:89305205-89305344   | chr16:89316932-89317078   | -0.148 | 0.0003367841868 | 0.024  | 0.6690858706  |
| MXE | CARF       | + | chr2:202924356-202924415  | chr2:202941859-202941980  | -0.149 | 0.004239967383  | 0.05   | 0.9952485255  |
| MXE | CENPU      | - | chr4:184697646-184697803  | chr4:184700819-184700881  | -0.15  | 1.65E-07        | 0.033  | 0.7284504163  |
| MXE | MSRA       | + | chr8:10207832-10207901    | chr8:10245103-10245223    | -0.15  | 2.77E-06        | -0.047 | 0             |
| MXE | GALNT7     | + | chr4:173297794-173297977  | chr4:173298114-173298297  | -0.152 | 0.008807758448  | -0.055 | 0.2018823108  |
| MXE | ZC3H18     | + | chr16:88608933-88609051   | chr16:88611267-88611536   | -0.152 | 0.00231520176   | -0.027 | 0.69030266    |
| MXE | GTPBP10    | + | chr7:90355085-90355230    | chr7:90372154-90372228    | -0.153 | 0.01403485768   | -0.001 | 1             |
| MXE | ENO2       | + | chr12:6917037-6917107     | chr12:6917580-6917714     | -0.153 | 6.05E-07        | -0.002 | 1             |
| MXE | SH3D19     | - | chr4:151147921-151148186  | chr4:151149499-151149561  | -0.154 | 0.0002641670792 | 0.021  | 1             |
| MXE | OSBPL1A    | - | chr18:24341546-24341658   | chr18:24366891-24366966   | -0.154 | 0.004423317853  | 0.03   | 1             |
| MXE | FYN        | - | chr6:111696276-111696456  | chr6:111700103-111700268  | -0.155 | 1.01E-06        | -0.018 | 0.05560903508 |
| MXE | CAPRIN2    | - | chr12:30719078-30719225   | chr12:30720810-30720915   | -0.157 | 0.009621429537  | -0.007 | 1             |
| MXE | FAM135A    | + | chr6:70426438-70426532    | chr6:70426569-70426709    | -0.159 | 0.03932366509   | 0.032  | 1             |
| MXE | GARNL3     | + | chr9:127264951-127265021  | chr9:127291167-127291242  | -0.161 | 0.04806034241   | -0.014 | 1             |
| MXE | DLG1       | - | chr3:197075836-197075870  | chr3:197076585-197076685  | -0.165 | 0.003356174234  | 0.051  | 0.2483918727  |
| MXE | RWDD3      | + | chr1:95244210-95244698    | chr1:95246541-95246657    | -0.166 | 0.003664600071  | -0.035 | 0.2305103564  |
| MXE | TTC28-AS1  | + | chr22:27935150-27935230   | chr22:27993123-27993535   | -0.166 | 0.007663048107  | 0.003  | 1             |
| MXE | ATP9B      | + | chr18:79154503-79154555   | chr18:79176812-79176907   | -0.167 | 0.001097782761  | -0.066 | 1             |
| MXE | QKI        | + | chr6:163455278-163455421  | chr6:163534981-163535125  | -0.168 | 3.05E-05        | 0.004  | 1             |
| MXE | USP15      | + | chr12:62325871-62325933   | chr12:62349220-62349307   | -0.168 | 0.002700201888  | -0.03  | 1             |
| MXE | MEF2A      | + | chr15:99671322-99671454   | chr15:99671519-99671657   | -0.169 | 0.002084043817  | 0.005  | 1             |
| MXE | MEF2A      | + | chr15:99671322-99671454   | chr15:99671519-99671657   | -0.174 | 0.0005770143277 | -0.004 | 1             |
| MXE | FOXK2      | + | chr17:82582740-82582934   | chr17:82584012-82584188   | -0.175 | 3.95E-05        | -0.011 | 1             |
| MXE | CAMK2G     | - | chr10:73824039-73824084   | chr10:73825278-73825347   | -0.176 | 0.009092240333  | -0.018 | 1             |
| MXE | ZNF562     | - | chr19:9656546-9656653     | chr19:9660719-9660874     | -0.177 | 0.01002915357   | 0.007  | 1             |
| MXE | DOPEY1     | + | chr6:83147235-83147291    | chr6:83148758-83148863    | -0.179 | 0.01456348202   | -0.015 | 1             |
| MXE | SRBD1      | - | chr2:45476992-45477075    | chr2:45488239-45488331    | -0.18  | 0.02536826635   | -0.011 | 1             |
| MXE | ANKMY1     | - | chr2:240507559-240507691  | chr2:240511860-240512001  | -0.18  | 0.009147376957  | 0.002  | 1             |
| MXE | RASSF4     | + | chr10:44982520-44982663   | chr10:44984021-44984113   | -0.181 | 0.006290006577  | 0.01   | 0.7969899087  |
| MXE | B3GNTL1    | - | chr17:82965650-82965746   | chr17:83005114-83005210   | -0.181 | 0.000398856445  | -0.004 | 1             |
| MXE | FAM118B    | + | chr11:126234994-126235087 | chr11:126240791-126241044 | -0.182 | 7.70E-05        | 0.017  | 1             |
| MXE | SF11       | + | chr22:31556941-31557059   | chr22:31561289-31561392   | -0.182 | 0.01122483829   | -0.009 | 1             |
| MXE | MRPS18C    | + | chr4:83458345-83458429    | chr4:83459739-83459797    | -0.184 | 1.82E-11        | 0.002  | 1             |
| MXE | GTPBP10    | + | chr7:90355085-90355230    | chr7:90372154-90372228    | -0.185 | 0.001463632539  | 0.008  | 1             |
| MXE | GALNT7     | + | chr4:173297794-173297977  | chr4:173298114-173298297  | -0.185 | 0.0004884841784 | -0.061 | 0.2428842518  |
| MXE | ZGRF1      | - | chr4:112603523-112603697  | chr4:112606007-112606091  | -0.186 | 0.005366809164  | -0.045 | 1             |
| MXE | RCC1       | + | chr1:28508829-28508901    | chr1:28516724-28516867    | -0.187 | 0.0002881438691 | 0.002  | 1             |
| MXE | MLLT10     | + | chr10:21586293-21586348   | chr10:21595330-21595440   | -0.189 | 1.95E-06        | -0.048 | 0.5245300014  |
| MXE | SH3D19     | - | chr4:151149499-151149561  | chr4:151159239-151159352  | -0.189 | 0.0144354842    | 0.041  | 1             |
| MXE | KIF13A     | - | chr6:17873376-17873437    | chr6:17898167-17898180    | -0.19  | 0.02565955525   | -0.012 | 1             |
| MXE | PQLC3      | + | chr2:11164203-11164261    | chr2:11171924-11172045    | -0.19  | 0.0108490355    | -0.022 | 1             |
| MXE | TMEM63B    | + | chr6:44150563-44150629    | chr6:44151845-44152008    | -0.191 | 0.002658984414  | -0.023 | 1             |
| MXE | RABGEF1    | + | chr7:66739995-66740792    | chr7:66771882-66772078    | -0.192 | 7.65E-05        | -0.04  | 0.3079977626  |
| MXE | ZGRF1      | - | chr4:112603523-112603697  | chr4:112606007-112606091  | -0.193 | 0.003456374552  | -0.049 | 1             |
| MXE | GAS5       | - | chr1:173865470-173865547  | chr1:173866527-173866567  | -0.194 | 8.27E-05        | -0.004 | 1             |
| MXE | TXLNA      | + | chr1:32184524-32184616    | chr1:32187953-32188124    | -0.196 | 0.001031064798  | 0.003  | 1             |
| MXE | MOK        | - | chr14:102263545-102263616 | chr14:102265822-102265912 | -0.197 | 0.02719533086   | -0.028 | 1             |
| MXE | RP11-421L2 | + | chr1:101075275-101075394  | chr1:101075394-101075716  | -0.198 | 0.0003131589947 | -0.042 | 0.4348041261  |
| MXE | SYTL2      | - | chr11:85714412-85714507   | chr11:85717482-85717530   | -0.199 | 0.008014771864  | 0.038  | 1             |
| MXE | DCUN1D4    | + | chr4:51891759-51891851    | chr4:51911069-51911174    | -0.2   | 1.55E-06        | 0.015  | 1             |
| MXE | MFF        | + | chr2:227342744-227342819  | chr2:227347225-227347384  | -0.2   | 2.28E-05        | -0.015 | 0.8673176874  |
| MXE | TFPI       | - | chr2:187513615-187513646  | chr2:187529363-187529485  | -0.201 | 0.002783607971  | -0.008 | 1             |
| MXE | HSF4       | + | chr16:67167474-67167599   | chr16:67167823-67167947   | -0.201 | 0.004540987033  | 0.008  | 1             |
| MXE | ABHD14A    | + | chr3:51978258-51978374    | chr3:51980392-51980628    | -0.203 | 0.0318128299    | -0.014 | 1             |
| MXE | UGGT2      | - | chr13:95856157-95856340   | chr13:95859590-95859675   | -0.204 | 0.001400276335  | 0.026  | 0.2681968531  |
| MXE | TRIM5      | - | chr11:5665980-5666081     | chr11:5667688-5667711     | -0.204 | 0.005212261631  | -0.008 | 1             |
| MXE | CLIP1      | - | chr12:122347374-122347479 | chr12:122351110-122351143 | -0.208 | 0.0009627121469 | 0.038  | 1             |
| MXE | ANKRD27    | - | chr19:32607634-32607832   | chr19:32615657-32615780   | -0.209 | 0.004476786939  | 0.019  | 1             |

|     |            |   |                           |                           |        |                 |        |                 |   |
|-----|------------|---|---------------------------|---------------------------|--------|-----------------|--------|-----------------|---|
| MXE | ACER3      | + | chr11:76985642-76985724   | chr11:76990538-76990574   | -0.21  | 0.006065508786  | -0.036 |                 | 1 |
| MXE | DLG1       | - | chr3:197075836-197075870  | chr3:197076585-197076682  | -0.212 | 0.003045392827  | 0.06   | 0.2112286043    |   |
| MXE | ACAA1      | - | chr3:38131925-38132005    | chr3:38133951-38134009    | -0.213 | 0.006804735893  | 0.037  | 0.007783566267  |   |
| MXE | SDHC       | + | chr1:161323613-161323670  | chr1:161328395-161328497  | -0.213 | 0.001810025378  | 0.006  |                 | 1 |
| MXE | SUZ12P1    | + | chr17:30734896-30734943   | chr17:30743300-30743369   | -0.214 | 6.63E-06        | 0.016  |                 | 1 |
| MXE | TTC25      | + | chr17:41935470-41935543   | chr17:41935598-41935749   | -0.215 | 0.03441493153   | -0.073 |                 | 1 |
| MXE | MPPE1      | - | chr18:11897525-11897620   | chr18:11905737-11905953   | -0.218 | 0.0011580361    | -0.004 |                 | 1 |
| MXE | CTNND1     | + | chr11:57789036-57789155   | chr11:57791384-57791673   | -0.219 | 0.004696136325  | -0.002 |                 | 1 |
| MXE | SFI1       | + | chr22:31556941-31557059   | chr22:31561289-31561392   | -0.221 | 0.04505429643   | -0.042 |                 | 1 |
| MXE | CD27-AS1   | - | chr12:6448639-6448737     | chr12:6450340-6450980     | -0.223 | 0.0003131589947 | 0.011  |                 | 1 |
| MXE | ARNTL2     | + | chr12:27370128-27370230   | chr12:27376345-27376387   | -0.224 | 0.002977500621  | -0.017 |                 | 1 |
| MXE | GAS5       | - | chr1:173864674-173864704  | chr1:173865228-173865282  | -0.224 | 0               | -0.004 |                 | 1 |
| MXE | WDR27      | - | chr6:169665485-169665556  | chr6:169670568-169670693  | -0.225 | 0.01847367209   | 0.026  |                 | 1 |
| MXE | FAM86C1    | + | chr11:71791735-71791819   | chr11:71793379-71793481   | -0.231 | 0.01960597291   | -0.004 |                 | 1 |
| MXE | SUN1       | + | chr7:848417-848615        | chr7:849922-850033        | -0.231 | 1.08E-07        | 0.017  | 0.8312730181    |   |
| MXE | KIF13A     | - | chr6:17789871-17789910    | chr6:17794248-17794395    | -0.232 | 0.01033725682   | -0.045 |                 | 1 |
| MXE | RP11-421L2 | + | chr1:101077362-101077508  | chr1:101083460-101083574  | -0.235 | 0.04252502176   | -0.1   | 2.15E-06        |   |
| MXE | MSL1       | + | chr17:40129244-40129627   | chr17:40132033-40132098   | -0.237 | 0               | 0.051  | 8.80E-07        |   |
| MXE | CTNND1     | + | chr11:57789036-57789155   | chr11:57791493-57791673   | -0.237 | 0.007137831095  | -0.012 |                 | 1 |
| MXE | FLCN       | - | chr17:17222500-17222661   | chr17:17223921-17224143   | -0.238 | 0.00723383536   | -0.006 |                 | 1 |
| MXE | CTNND1     | + | chr11:57789036-57789155   | chr11:57791491-57791673   | -0.238 | 0.007189633564  | -0.013 |                 | 1 |
| MXE | SYTL2      | - | chr11:85714412-85714507   | chr11:85717482-85717726   | -0.242 | 3.60E-07        | 0.005  |                 | 1 |
| MXE | PCBP1-AS1  | - | chr2:70055713-70055910    | chr2:70059642-70059680    | -0.246 | 0.01388670621   | 0.088  | 0.4140041386    |   |
| MXE | PCBP1-AS1  | - | chr2:70055713-70055910    | chr2:70059642-70059680    | -0.246 | 0.01388670621   | 0.099  | 0.1388438884    |   |
| MXE | SCHIP1     | + | chr3:159866162-159866281  | chr3:159886206-159886324  | -0.247 | 0               | -0.017 | 0.6671294199    |   |
| MXE | ARHGEF40   | + | chr14:21087000-21087105   | chr14:21087319-21087463   | -0.249 | 6.58E-05        | -0.095 | 8.37E-13        |   |
| MXE | RUFY3      | + | chr4:70789494-70789592    | chr4:70793764-70793904    | -0.252 | 0.005649545712  | -0.195 | 0               |   |
| MXE | UGGT2      | - | chr13:95859590-95859675   | chr13:95860787-95860883   | -0.253 | 0.0001298389853 | 0.039  | 0.8375223012    |   |
| MXE | SPOP       | - | chr17:49636758-49636809   | chr17:49668026-49668078   | -0.254 | 0.009456335949  | -0.035 | 0.5066287568    |   |
| MXE | PCNT       | + | chr21:46421969-46422124   | chr21:46425830-46425971   | -0.26  | 0.01452950685   | -0.016 | 0.9719564839    |   |
| MXE | SUN1       | + | chr7:849519-849603        | chr7:849922-850033        | -0.266 | 1.97E-10        | 0.041  | 0.1766295962    |   |
| MXE | PCBP1-AS1  | - | chr2:70055655-70055910    | chr2:70059642-70059680    | -0.27  | 0.01020578741   | 0.056  | 0.9571047309    |   |
| MXE | CTNND1     | + | chr11:57789036-57789155   | chr11:57794009-57794081   | -0.274 | 1.02E-13        | -0.038 | 0.4669800982    |   |
| MXE | SNX14      | - | chr6:85541984-85542043    | chr6:85543181-85543306    | -0.275 | 9.64E-12        | -0.031 | 0.02285440182   |   |
| MXE | PPRC1      | + | chr10:102144249-102144307 | chr10:102146671-102147392 | -0.277 | 2.09E-07        | 0.039  | 0.2473813842    |   |
| MXE | DGKZ       | + | chr11:46368001-46368079   | chr11:46369493-46369550   | -0.279 | 0.004410053941  | 0.003  |                 | 1 |
| MXE | FAM228B    | + | chr2:24139369-24139450    | chr2:24146929-24147086    | -0.281 | 0.00294268215   | -0.013 |                 | 1 |
| MXE | RNF146     | + | chr6:127280515-127280604  | chr6:127285207-127285348  | -0.284 | 0.0001091448679 | -0.077 | 0.0004303877121 |   |
| MXE | GUSBP11    | - | chr22:23695172-23695517   | chr22:23700725-23700845   | -0.284 | 0.0001265450782 | -0.018 |                 | 1 |
| MXE | TNC        | - | chr9:115046409-115046682  | chr9:115048259-115048532  | -0.285 | 0.04224761506   | -0.045 | 3.59E-07        |   |
| MXE | SLCO5A1    | - | chr8:69738039-69738204    | chr8:69755423-69755641    | -0.288 | 0.000307498296  | -0.05  |                 | 1 |
| MXE | SLC29A1    | + | chr6:44227262-44227342    | chr6:44229389-44229471    | -0.303 | 0               | 0.044  | 0.001575429063  |   |
| MXE | DHRS4L2    | + | chr14:23995031-23995133   | chr14:24001383-24001517   | -0.307 | 0.02072749562   | 0.052  | 0.07792216463   |   |
| MXE | TPT1-AS1   | + | chr13:45379925-45380001   | chr13:45383090-45383235   | -0.308 | 9.27E-05        | -0.012 |                 | 1 |
| MXE | EMILIN2    | + | chr18:2884963-2885139     | chr18:2890560-2892486     | -0.309 | 9.76E-05        | 0.017  |                 | 1 |
| MXE | C1QTNF6    | - | chr22:37191671-37191737   | chr22:37195380-37195458   | -0.314 | 0.01470907625   | -0.001 |                 | 1 |
| MXE | ELOVL5     | - | chr6:53290094-53290189    | chr6:53290400-53290535    | -0.319 | 0.0004536946538 | -0.06  |                 | 1 |
| MXE | CCNJL      | - | chr5:160269462-160269544  | chr5:160276268-160276412  | -0.321 | 0.004337264385  | -0.018 |                 | 1 |
| MXE | FAM45A     | + | chr10:119123468-119123569 | chr10:119129514-119129622 | -0.327 | 8.86E-05        | -0.01  |                 | 1 |
| MXE | SEC31A     | - | chr4:82861630-82861708    | chr4:82862533-82862572    | -0.328 | 1.11E-09        | -0.01  |                 | 1 |
| MXE | U2AF1      | - | chr21:6492130-6492197     | chr21:6493043-6493110     | -0.334 | 0.04701157616   | -0.078 |                 | 1 |
| MXE | RFWD2      | - | chr1:176149005-176149074  | chr1:176184632-176184692  | -0.34  | 0.01289228184   | -0.014 |                 | 1 |
| MXE | YY1AP1     | - | chr1:155679927-155680008  | chr1:155680381-155680456  | -0.342 | 3.79E-05        | 0.004  |                 | 1 |
| MXE | FANCI      | + | chr15:89245194-89245311   | chr15:89245755-89245839   | -0.348 | 1.65E-07        | -0.007 |                 | 1 |
| MXE | FYN        | - | chr6:111699514-111699670  | chr6:111700103-111700268  | -0.349 | 0               | -0.056 |                 | 0 |
| MXE | TADA2A     | + | chr17:37426949-37427009   | chr17:37437737-37437922   | -0.353 | 0.0007720291368 | 0.06   | 0.9317169586    |   |
| MXE | CBWD1      | - | chr9:147900-148040        | chr9:151304-151427        | -0.365 | 0.01047188361   | -0.039 |                 | 1 |
| MXE | ETFA       | - | chr15:76284364-76284460   | chr15:76284804-76284927   | -0.367 | 2.24E-05        | -0.008 |                 | 1 |
| MXE | CTNND1     | + | chr11:57789036-57789155   | chr11:57794009-57794081   | -0.371 | 0               | -0.045 | 0.2954947816    |   |
| MXE | PCBP1-AS1  | - | chr2:70055713-70055910    | chr2:70059642-70059680    | -0.379 | 0.0002725051906 | 0.095  |                 | 1 |
| MXE | RNF146     | + | chr6:127280515-127280604  | chr6:127282286-127282395  | -0.382 | 0.01094845149   | -0.174 | 1.52E-11        |   |
| MXE | HDAC11     | + | chr3:13498512-13498555    | chr3:13500712-13500789    | -0.384 | 0.0001997038677 | 0.023  |                 | 1 |
| MXE | PGAP2      | + | chr11:3811249-3811424     | chr11:3822908-3822993     | -0.385 | 4.38E-11        | 0.01   | 0.01935677844   |   |

|     |            |   |                           |                           |        |                 |        |                 |   |
|-----|------------|---|---------------------------|---------------------------|--------|-----------------|--------|-----------------|---|
| MXE | MTMR2      | - | chr11:95882373-95882496   | chr11:95887611-95887684   | -0.388 | 0.01313028342   | -0.067 |                 | 1 |
| MXE | NQO1       | - | chr16:69713027-69713129   | chr16:69714963-69715077   | -0.394 | 0               | 0.016  |                 | 1 |
| MXE | FAM86C1    | + | chr11:71791738-71791819   | chr11:71793379-71793481   | -0.395 | 0.00664473448   | 0.04   |                 | 1 |
| MXE | SUN1       | + | chr7:849519-849603        | chr7:849922-850033        | -0.397 | 5.58E-12        | -0.011 |                 | 1 |
| MXE | TANGO2     | + | chr22:20055942-20056013   | chr22:20063337-20063442   | -0.397 | 0.00308776571   | 0.022  | 0.547983957     | 1 |
| MXE | LINC00894  | + | chrX:149941789-149941847  | chrX:149943650-149943762  | -0.4   | 0.002052545047  | 0.063  |                 | 1 |
| MXE | SEPT2      | + | chr2:241317498-241317599  | chr2:241324408-241324662  | -0.404 | 1.58E-05        | 0.052  |                 | 1 |
| MXE | ZHX3       | - | chr20:41213733-41213899   | chr20:41267462-41267612   | -0.408 | 0.01738238435   | -0.087 |                 | 1 |
| MXE | RP11-507M: | + | chr2:24139369-24139450    | chr2:24146929-24147086    | -0.408 | 0.004156507974  | 0.017  |                 | 1 |
| MXE | LINC00630  | + | chrX:102816991-102817082  | chrX:102825992-102826169  | -0.413 | 0.002188454797  | -0.126 |                 | 1 |
| MXE | SS18       | - | chr18:26080304-26080423   | chr18:26082362-26082528   | -0.419 | 0.0001659601603 | 0.244  |                 | 1 |
| MXE | MX1        | + | chr21:41449136-41449295   | chr21:41451166-41451243   | -0.419 | 0.04197901362   | 0.008  |                 | 1 |
| MXE | PCBP1-AS1  | - | chr2:70055713-70055910    | chr2:70059642-70059680    | -0.431 | 0.03469929876   | 0.11   | 0.1021250984    | 1 |
| MXE | DNM1       | + | chr9:128224250-128224389  | chr9:128226034-128226173  | -0.438 | 2.11E-05        | 0.155  | 3.08E-07        | 1 |
| MXE | TMBIM6     | + | chr12:49741956-49742280   | chr12:49743416-49743565   | -0.442 | 0.001459892005  | 0.072  | 0.1378272727    | 1 |
| MXE | LINC00894  | + | chrX:149942183-149942329  | chrX:149943650-149943762  | -0.445 | 0.0005601986855 | 0.13   |                 | 1 |
| MXE | DAK        | + | chr11:61335839-61335937   | chr11:61336203-61336390   | -0.446 | 0.0003061337011 | 0.036  |                 | 1 |
| MXE | ISYNA1     | - | chr19:18436972-18437105   | chr19:18437598-18437760   | -0.472 | 3.96E-05        | -0.001 |                 | 1 |
| MXE | TRMT2B     | - | chrX:101051250-101051366  | chrX:101051643-101051733  | -0.474 | 0.004271075024  | 0.044  |                 | 1 |
| MXE | TNFSF13    | + | chr17:7559623-7559702     | chr17:7559850-7559893     | -0.476 | 3.35E-06        | 0.011  |                 | 1 |
| MXE | ANKMY1     | - | chr2:240509347-240509455  | chr2:240511860-240512001  | -0.477 | 0.005009216857  | 0.046  |                 | 1 |
| MXE | RP11-175P1 | - | chr12:100177042-100177120 | chr12:100180552-100180716 | -0.478 | 0.0002414008361 | -0.073 |                 | 1 |
| MXE | KIAA1468   | + | chr18:62279773-62279856   | chr18:62280359-62280442   | -0.495 | 1.61E-13        | -0.055 | 0.01431104557   | 1 |
| MXE | SYTL2      | - | chr11:85714412-85714507   | chr11:85717482-85717530   | -0.512 | 0               | -0.016 |                 | 1 |
| MXE | DLEU1      | + | chr13:50433412-50433550   | chr13:50527865-50528064   | -0.517 | 0.0001288175153 | -0.168 |                 | 1 |
| MXE | ZCWPW2     | + | chr3:28492126-28492173    | chr3:28514063-28514122    | -0.527 | 0.0004781924829 | 0.044  |                 | 1 |
| MXE | CNTLN      | + | chr9:17273732-17273866    | chr9:17298189-17298352    | -0.54  | 6.62E-10        | 0.022  |                 | 1 |
| MXE | HSD11B1L   | + | chr19:5684818-5684905     | chr19:5684964-5685119     | -0.541 | 0.01372157933   | -0.02  | 0.790753828     | 1 |
| MXE | SS18       | - | chr18:26080304-26080423   | chr18:26084051-26084175   | -0.557 | 9.01E-05        | 0.142  |                 | 1 |
| MXE | HSD11B1L   | + | chr19:5684818-5684905     | chr19:5684964-5685119     | -0.557 | 0.007513422672  | -0.03  | 0.3387484737    | 1 |
| MXE | NAT1       | + | chr8:18212390-18212774    | chr8:18216876-18216994    | -0.582 | 0.0002815207596 | -0.008 |                 | 1 |
| MXE | HDHD1      | - | chrX:7077219-7077449      | chrX:7105619-7105838      | -0.583 | 0               | 0      |                 | 1 |
| MXE | SYTL2      | - | chr11:85711112-85711232   | chr11:85714412-85714507   | -0.625 | 0               | -0.022 |                 | 1 |
| MXE | NQO2       | + | chr6:3003668-3003789      | chr6:3004494-3004651      | -0.629 | 0.0003073158693 | -0.037 |                 | 1 |
| MXE | NOTCH2NL   | - | chr1:146136352-146136455  | chr1:146142649-146142752  | -0.66  | 4.61E-07        | 0.096  |                 | 1 |
| MXE | TCF7L2     | + | chr10:113159919-113159992 | chr10:113160618-113160691 | -0.684 | 0.0007076008699 | -0.061 |                 | 1 |
| MXE | FAM122C    | + | chrX:134847882-134847971  | chrX:134849166-134849228  | -0.69  | 0.0008449722938 | 0.015  |                 | 1 |
| MXE | TXNRD1     | + | chr12:104290992-104291104 | chr12:104309758-104309950 | -0.697 | 4.20E-05        | 0.135  |                 | 1 |
| MXE | TVP23C-CD  | - | chr17:15503097-15503232   | chr17:15540432-15540561   | -0.827 | 0               | -0.06  | 0.6267284598    | 1 |
| RI  | HLA-A      | + | chr6:29944499-29945091    | NA                        | 0.911  | 0               | 0.041  | 0.5203650265    | 1 |
| RI  | NID2       | - | chr14:52005736-52006660   | NA                        | 0.884  | 1.29E-06        | -0.022 | 4.39E-08        | 1 |
| RI  | ZNF582-AS  | + | chr19:56398276-56399168   | NA                        | 0.809  | 0               | -0.003 | 8.31E-05        | 1 |
| RI  | TPT1       | - | chr13:45340711-45341158   | NA                        | 0.802  | 4.16E-13        | -0.045 | 0.009230892338  | 1 |
| RI  | WDR90      | + | chr16:655057-655468       | NA                        | 0.76   | 0.0002730825593 | -0.015 |                 | 1 |
| RI  | TCF4       | - | chr18:55228846-55232671   | NA                        | 0.753  | 7.37E-05        | -0.018 | 0.0002409891459 | 1 |
| RI  | PLXNB1     | - | chr3:48410454-48411036    | NA                        | 0.641  | 0.01297814223   | -0.015 |                 | 0 |
| RI  | QKI        | + | chr6:163563419-163570145  | NA                        | 0.602  | 3.34E-14        | -0.026 | 1.78E-06        | 1 |
| RI  | AP1G2      | - | chr14:23563583-23563856   | NA                        | 0.577  | 6.09E-10        | -0.009 | 0.5361133281    | 1 |
| RI  | NPR2       | + | chr9:35808508-35808853    | NA                        | 0.544  | 0.001284150908  | -0.042 | 0.006974750714  | 1 |
| RI  | ZNF517     | + | chr8:144802869-144804238  | NA                        | 0.542  | 8.14E-05        | -0.005 |                 | 1 |
| RI  | ABCB6      | - | chr2:219210380-219210823  | NA                        | 0.538  | 0.001910688849  | -0.03  |                 | 0 |
| RI  | AP1G2      | - | chr14:23563379-23563638   | NA                        | 0.518  | 9.00E-08        | -0.052 |                 | 1 |
| RI  | PPIL2      | + | chr22:21694936-21695496   | NA                        | 0.507  | 0.000377647128  | -0.031 |                 | 1 |
| RI  | FNBP1L     | + | chr1:93550946-93554659    | NA                        | 0.47   | 0               | 0.113  | 1.85E-13        | 1 |
| RI  | GAS5       | - | chr1:173865228-173865547  | NA                        | 0.436  | 0               | -0.012 | 0.002626283484  | 1 |
| RI  | PI4KAP2    | - | chr22:21475210-21476764   | NA                        | 0.423  | 0.0002582586347 | 0.142  |                 | 1 |
| RI  | AP1G2      | - | chr14:23563715-23564221   | NA                        | 0.412  | 3.17E-07        | -0.088 | 0.002836188205  | 1 |
| RI  | QKI        | + | chr6:163563419-163570145  | NA                        | 0.403  | 4.78E-07        | 0.008  |                 | 1 |
| RI  | ARL6IP4    | + | chr12:122981128-122981879 | NA                        | 0.401  | 1.61E-08        | -0.042 | 0.007097848044  | 1 |
| RI  | U2AF1L4    | - | chr19:35744322-35744738   | NA                        | 0.397  | 9.78E-05        | -0.004 | 0.9339013671    | 1 |
| RI  | OBSL1      | - | chr2:219550728-219551798  | NA                        | 0.388  | 0.03714903893   | -0.067 | 3.75E-06        | 1 |
| RI  | BBS1       | + | chr11:66531655-66532219   | NA                        | 0.388  | 0.0009446880095 | -0.029 | 2.07E-11        | 1 |
| RI  | ATHL1      | + | chr11:290677-292095       | NA                        | 0.381  | 3.71E-07        | -0.051 | 0.2222305185    | 1 |

|    |           |   |                           |    |       |                 |        |                 |
|----|-----------|---|---------------------------|----|-------|-----------------|--------|-----------------|
| RI | HLA-F     | + | chr6:29726010-29726526    | NA | 0.379 | 0.0001249613788 | -0.023 | 1.84E-09        |
| RI | TTC28-AS1 | + | chr22:27997410-27998838   | NA | 0.378 | 9.64E-07        | 0.013  | 0.9865056133    |
| RI | POMT1     | + | chr9:131509902-131510415  | NA | 0.364 | 5.98E-08        | -0.062 | 1.81E-07        |
| RI | KIAA0195  | + | chr17:75492928-75493593   | NA | 0.355 | 4.12E-08        | -0.024 | 4.79E-05        |
| RI | SERHL2    | + | chr22:42555663-42556083   | NA | 0.355 | 8.44E-05        | -0.049 | 1               |
| RI | ENO2      | + | chr12:6916670-6917107     | NA | 0.353 | 0               | -0.003 | 0               |
| RI | KIAA1217  | + | chr10:24544980-24547843   | NA | 0.335 | 0.02220739931   | -0.008 | 1               |
| RI | FBXL6     | - | chr8:144356299-144356713  | NA | 0.333 | 0.00642391228   | -0.021 | 0.1849841908    |
| RI | CELSR3    | - | chr3:48641850-48642467    | NA | 0.33  | 0.04364710769   | 0.001  | 1               |
| RI | ATP5D     | + | chr19:1244314-1244825     | NA | 0.328 | 7.42E-07        | -0.035 | 0.01190386311   |
| RI | MFSD10    | - | chr4:2931374-2931936      | NA | 0.328 | 5.32E-07        | 0.073  | 0.007813240274  |
| RI | PNISR     | - | chr6:99403828-99404702    | NA | 0.328 | 6.32E-09        | 0.003  | 1               |
| RI | ARHGAP33  | + | chr19:35787167-35788822   | NA | 0.324 | 0.0001837228863 | -0.015 | 1               |
| RI | SYVN1     | - | chr11:65130001-65130379   | NA | 0.323 | 0.01538941007   | -0.02  | 0.1608661574    |
| RI | ELMOD3    | + | chr2:85355075-85357252    | NA | 0.322 | 0.002439817932  | -0.01  | 1               |
| RI | GOLGA2    | - | chr9:128262562-128263092  | NA | 0.313 | 2.48E-07        | -0.013 | 2.35E-08        |
| RI | BTN3A2    | + | chr6:26367989-26368267    | NA | 0.308 | 0.001170885484  | -0.009 | 0.7901193723    |
| RI | MAGED4    | + | chrX:52186396-52187845    | NA | 0.307 | 0.01903661337   | 0.087  | 1               |
| RI | AP1G2     | - | chr14:23565605-23566160   | NA | 0.306 | 0.000143996723  | -0.014 | 1               |
| RI | SNHG17    | - | chr20:38421005-38422241   | NA | 0.299 | 0.004901189048  | -0.03  | 1               |
| RI | MUS81     | + | chr11:65864719-65865145   | NA | 0.292 | 7.45E-05        | -0.032 | 0.004995050927  |
| RI | ADD1      | + | chr4:2908514-2909431      | NA | 0.284 | 0.01160406502   | 0.007  | 1               |
| RI | ZSWIM8    | + | chr10:73794146-73794639   | NA | 0.284 | 0.002500567157  | 0.01   | 1               |
| RI | U2AF1L4   | - | chr19:35744322-35745187   | NA | 0.282 | 0.005964038928  | 0.018  | 1               |
| RI | TTL3      | + | chr3:9817644-9820741      | NA | 0.276 | 0.0001504685719 | -0.032 | 0.4762847514    |
| RI | ATAT1     | + | chr6:30642767-30644679    | NA | 0.271 | 2.34E-08        | 0.125  | 0               |
| RI | AP1G2     | - | chr14:23562503-23563638   | NA | 0.27  | 0.000308896551  | -0.01  | 1               |
| RI | WBP1      | + | chr2:74459437-74459745    | NA | 0.268 | 5.64E-05        | 0.04   | 0.3367828665    |
| RI | ACADVL    | + | chr17:7224320-7224552     | NA | 0.266 | 0.03643105134   | -0.006 | 1               |
| RI | NAT9      | - | chr17:74771959-74772277   | NA | 0.266 | 0.0003929852813 | -0.11  | 5.20E-08        |
| RI | HCN3      | + | chr1:155283973-155284757  | NA | 0.266 | 0.001850082181  | -0.031 | 0.5948979623    |
| RI | AP1G2     | - | chr14:23561511-23562415   | NA | 0.266 | 0.01014875315   | 0.032  | 0.05209917345   |
| RI | PSME1     | + | chr14:24136984-24137431   | NA | 0.265 | 0.04795993741   | 0.059  | 0.3903378356    |
| RI | C21orf58  | - | chr21:46301129-46302154   | NA | 0.265 | 3.09E-06        | -0.064 | 0.05204595944   |
| RI | NICN1     | - | chr3:49424948-49425438    | NA | 0.264 | 0.02849421127   | -0.042 | 0.00314863413   |
| RI | C11orf49  | + | chr11:47161126-47162247   | NA | 0.261 | 0.0006560085309 | -0.034 | 0.147638566     |
| RI | POMZP3    | - | chr7:76618182-76618615    | NA | 0.259 | 0.01055453037   | -0.061 | 0.15525877      |
| RI | ATP5G1    | + | chr17:48893408-48895334   | NA | 0.256 | 0.0005832107347 | 0.039  | 1               |
| RI | MIB2      | + | chr1:1628018-1628399      | NA | 0.252 | 0.002590851266  | -0.012 | 0.003114513445  |
| RI | PLCD4     | + | chr2:218633604-218634221  | NA | 0.245 | 8.18E-06        | -0.019 | 1               |
| RI | WDR6      | + | chr3:49011634-49014293    | NA | 0.245 | 9.44E-07        | -0.005 | 1               |
| RI | TMEM175   | + | chr4:948115-948615        | NA | 0.244 | 0.001050415336  | -0.03  | 1               |
| RI | MUS81     | + | chr11:65865810-65866439   | NA | 0.242 | 2.06E-09        | -0.033 | 0.0001614240489 |
| RI | TMEM80    | + | chr11:698868-700235       | NA | 0.241 | 9.73E-06        | -0.016 | 0.03065871459   |
| RI | LIN37     | + | chr19:35754245-35754519   | NA | 0.239 | 0.00873127551   | -0.003 | 1               |
| RI | DHRS1     | - | chr14:24292183-24292784   | NA | 0.237 | 0.002376863758  | -0.052 | 0.0008685476598 |
| RI | TRIM22    | + | chr11:5697247-5698545     | NA | 0.236 | 0.03643105134   | -0.003 | 0.4342450058    |
| RI | BAX       | + | chr19:48960809-48961798   | NA | 0.233 | 0               | -0.028 | 2.03E-05        |
| RI | C16orf93  | - | chr16:30759341-30759724   | NA | 0.231 | 0.04587055951   | -0.103 | 0.02202247675   |
| RI | ARL6IP4   | + | chr12:122981128-122981879 | NA | 0.229 | 0.00421474628   | -0.031 | 0.4367982126    |
| RI | WBP1      | + | chr2:74459437-74459745    | NA | 0.226 | 0.0007736868659 | 0.037  | 0.1526846262    |
| RI | TUBGCP6   | - | chr22:50219287-50219791   | NA | 0.225 | 0.007846724902  | 0      | 0.0007867004752 |
| RI | BDH2      | - | chr4:103085348-103086540  | NA | 0.223 | 8.25E-05        | -0.106 | 0.0006568547472 |
| RI | TJAP1     | + | chr6:43503622-43506553    | NA | 0.22  | 7.65E-05        | -0.008 | 0.003719528183  |
| RI | NRBP2     | - | chr8:143839508-143840030  | NA | 0.219 | 1.41E-12        | -0.008 | 1.90E-06        |
| RI | RBM5      | + | chr3:50100531-50103166    | NA | 0.214 | 0.0005495594221 | -0.012 | 1               |
| RI | MAU2      | + | chr19:19344848-19345369   | NA | 0.213 | 0.000191588729  | -0.015 | 1.42E-05        |
| RI | DDX11     | + | chr12:31103576-31104791   | NA | 0.21  | 0.01676346818   | -0.051 | 0.004456518969  |
| RI | ZNF7      | + | chr8:144829042-144829604  | NA | 0.209 | 0.01867064045   | -0.057 | 0.06075179784   |
| RI | CDK11A    | - | chr1:1703475-1703940      | NA | 0.208 | 0.0007969360077 | -0.041 | 1.45E-07        |
| RI | CCDC159   | + | chr19:11354579-11354943   | NA | 0.208 | 0.01046368681   | -0.002 | 1               |
| RI | RBM8A     | - | chr1:145926808-145927077  | NA | 0.208 | 0.007696141702  | -0.03  | 0.2455024824    |
| RI | GAS5      | - | chr1:173864483-173864704  | NA | 0.206 | 4.03E-10        | -0.017 | 4.93E-08        |

|    |            |   |                           |    |       |                 |        |                 |
|----|------------|---|---------------------------|----|-------|-----------------|--------|-----------------|
| RI | CUL9       | + | chr6:43196068-43196862    | NA | 0.205 | 0.009992530522  | -0.036 | 5.12E-05        |
| RI | PRMT2      | + | chr21:46660832-46661936   | NA | 0.205 | 0.006535676432  | -0.007 | 4.34E-05        |
| RI | C21orf59   | - | chr21:32601666-32603292   | NA | 0.204 | 0.007746832051  | 0.072  | 0.01577654258   |
| RI | CTC1       | - | chr17:8229890-8230468     | NA | 0.204 | 0.001464590268  | -0.057 | 1.81E-06        |
| RI | CC2D1B     | - | chr1:52360423-52361132    | NA | 0.202 | 1.15E-07        | -0.023 | 8.67E-14        |
| RI | MUS81      | + | chr11:65864719-65865323   | NA | 0.2   | 4.10E-08        | -0.007 | 0.2614932913    |
| RI | CDK5RAP3   | + | chr17:47974399-47975337   | NA | 0.199 | 6.86E-10        | -0.025 | 0.3129948839    |
| RI | PCSK7      | - | chr11:117223207-117224216 | NA | 0.199 | 0.02272113874   | 0.002  | 0.1947017111    |
| RI | CENPT      | - | chr16:67829764-67830548   | NA | 0.195 | 8.95E-05        | -0.06  | 0.06005234483   |
| RI | PCYT2      | - | chr17:81906099-81906546   | NA | 0.195 | 0               | -0.015 | 3.27E-12        |
| RI | HSF4       | + | chr16:67165521-67165846   | NA | 0.187 | 0.0009475934077 | -0.014 | 1               |
| RI | PAN2       | - | chr12:56319087-56319487   | NA | 0.186 | 0.008317953933  | -0.045 | 0.03870315637   |
| RI | FADS3      | - | chr11:61876358-61876963   | NA | 0.185 | 0.009886221094  | -0.085 | 1.03E-07        |
| RI | ING4       | - | chr12:6652270-6652770     | NA | 0.184 | 0.001649350636  | 0      | 1               |
| RI | DPM2       | - | chr9:127936552-127937523  | NA | 0.183 | 9.37E-07        | -0.054 | 0               |
| RI | EWSR1      | + | chr22:29298732-29299851   | NA | 0.181 | 0.009886221094  | -0.027 | 0.1021827972    |
| RI | IL17RC     | + | chr3:9923880-9924291      | NA | 0.18  | 0.007244724238  | -0.054 | 2.35E-08        |
| RI | TNFRSF25   | - | chr1:6462862-6463127      | NA | 0.18  | 0.004890547527  | -0.072 | 0.3375541643    |
| RI | RPL12      | - | chr9:127449609-127451405  | NA | 0.177 | 0.0001196031007 | -0.003 | 1               |
| RI | C16orf93   | - | chr16:30759011-30759247   | NA | 0.176 | 0.03403927258   | -0.063 | 1               |
| RI | TIAL1      | - | chr10:119576610-119577203 | NA | 0.175 | 0.0004445519329 | -0.01  | 0.0007022138268 |
| RI | CAPRIN2    | - | chr12:30714958-30716676   | NA | 0.173 | 0.04460971474   | -0.078 | 0.0002060574012 |
| RI | EFHC1      | + | chr6:52452687-52454287    | NA | 0.172 | 0.006772555752  | -0.016 | 0.5857241083    |
| RI | MAGED2     | + | chrX:54815247-54816007    | NA | 0.171 | 3.60E-08        | -0.037 | 0               |
| RI | GAS5       | - | chr1:173864256-173864506  | NA | 0.171 | 1.09E-08        | -0.015 | 1.05E-13        |
| RI | STX10      | - | chr19:13144061-13144671   | NA | 0.17  | 0               | -0.021 | 2.70E-10        |
| RI | TMEM234    | - | chr1:32216196-32217351    | NA | 0.169 | 0.01538941007   | -0.035 | 3.41E-08        |
| RI | BRF1       | - | chr14:105211121-105212164 | NA | 0.167 | 0.0236309712    | -0.014 | 0               |
| RI | ARL16      | - | chr17:81682033-81682675   | NA | 0.167 | 8.83E-05        | 0.014  | 1               |
| RI | CCNK       | + | chr14:99500765-99502376   | NA | 0.166 | 0.0009695331436 | -0.049 | 0.4311923144    |
| RI | FAM50A     | + | chrX:154449680-154449931  | NA | 0.165 | 1.14E-05        | -0.012 | 1.14E-12        |
| RI | DXO        | - | chr6:31970605-31971147    | NA | 0.165 | 0.02210643183   | -0.035 | 0.06841266514   |
| RI | ZFYVE19    | + | chr15:40813942-40814569   | NA | 0.164 | 0.03791551547   | 0.002  | 1               |
| RI | USP21      | + | chr1:161164533-161164942  | NA | 0.162 | 0.01262240708   | -0.073 | 0.0002098949126 |
| RI | PDZD7      | - | chr10:101021797-101022385 | NA | 0.162 | 0.002698189981  | -0.049 | 1               |
| RI | RP11-252A2 | - | chr16:74352039-74352378   | NA | 0.16  | 0.009084561186  | 0.045  | 1               |
| RI | TPRN       | - | chr9:137191616-137192365  | NA | 0.157 | 2.31E-05        | -0.002 | 0.3809034212    |
| RI | ACAA1      | - | chr3:38126161-38126700    | NA | 0.156 | 8.83E-05        | -0.028 | 6.65E-13        |
| RI | TMEM218    | - | chr11:125102131-125102809 | NA | 0.156 | 0.02020371516   | -0.062 | 7.28E-05        |
| RI | CCDC150    | + | chr2:196729192-196729861  | NA | 0.155 | 0.00999475111   | 0.082  | 1               |
| RI | DSN1       | - | chr20:36770872-36771473   | NA | 0.155 | 0.01437449705   | -0.032 | 1               |
| RI | EIF4A2     | + | chr3:186784563-186786051  | NA | 0.153 | 4.57E-06        | 0.015  | 0.1015092422    |
| RI | RNF215     | - | chr22:30379481-30379780   | NA | 0.152 | 0.003341924059  | -0.015 | 0.1179909992    |
| RI | HSF4       | + | chr16:67169278-67169945   | NA | 0.151 | 0.01288428282   | -0.049 | 1               |
| RI | MUTYH      | - | chr1:45332762-45333324    | NA | 0.151 | 0.01473339108   | 0.093  | 0               |
| RI | WDR24      | - | chr16:685868-686186       | NA | 0.15  | 0.02211554839   | -0.036 | 6.14E-06        |
| RI | MEN1       | - | chr11:64805634-64806368   | NA | 0.15  | 0.0002725309832 | -0.014 | 0.003925373802  |
| RI | GAS5       | - | chr1:173864256-173865282  | NA | 0.15  | 0               | -0.012 | 0               |
| RI | NR2C2      | + | chr3:15037999-15039227    | NA | 0.148 | 0.01160759958   | -0.005 | 0.1156182394    |
| RI | DDIT3      | - | chr12:57517268-57517753   | NA | 0.147 | 0.00342269305   | -0.036 | 0.08978042819   |
| RI | ZSWIM8     | + | chr10:73794146-73794639   | NA | 0.147 | 0.007527884364  | -0.003 | 0.4762847514    |
| RI | JMJD8      | - | chr16:683321-683598       | NA | 0.146 | 0.004143798929  | -0.1   | 0               |
| RI | CIRBP      | + | chr19:1271980-1273172     | NA | 0.145 | 7.01E-05        | -0.001 | 1               |
| RI | MOV10      | + | chr1:112698286-112699810  | NA | 0.143 | 0.001314429458  | -0.028 | 6.57E-05        |
| RI | ING4       | - | chr12:6652661-6653050     | NA | 0.142 | 0.004201701249  | -0.009 | 0.002957063449  |
| RI | ERCC3      | - | chr2:127289336-127289824  | NA | 0.142 | 8.44E-05        | -0.015 | 6.33E-06        |
| RI | TPM3       | - | chr1:154170648-154172978  | NA | 0.14  | 1.13E-05        | 0.093  | 0.04270665674   |
| RI | DVL3       | + | chr3:184164795-184165206  | NA | 0.14  | 1.86E-06        | -0.001 | 0.7797013353    |
| RI | ATP13A1    | - | chr19:19656659-19656916   | NA | 0.138 | 0.006156541073  | -0.036 | 0.00349910865   |
| RI | SAT2       | - | chr17:7627142-7627414     | NA | 0.136 | 0.0002695271887 | -0.037 | 0               |
| RI | EFNA1      | + | chr1:155133502-155133780  | NA | 0.136 | 0.01309155262   | -0.033 | 8.54E-09        |
| RI | FBXO9      | + | chr6:53092733-53093561    | NA | 0.135 | 0.01685875146   | -0.016 | 0.005485746792  |
| RI | EFEMP2     | - | chr11:65870120-65870658   | NA | 0.135 | 3.56E-06        | -0.005 | 0.0003296405564 |

|    |          |   |                           |    |        |                 |        |                 |
|----|----------|---|---------------------------|----|--------|-----------------|--------|-----------------|
| RI | CDK11A   | - | chr1:1704222-1704655      | NA | 0.134  | 0.004818730187  | -0.041 | 0.01994143287   |
| RI | RHOT2    | + | chr16:672253-672825       | NA | 0.134  | 1.09E-08        | -0.019 | 0.02641073325   |
| RI | MOV10    | + | chr1:112698286-112698789  | NA | 0.132  | 0.02573388838   | -0.05  | 1.32E-05        |
| RI | CRELD1   | + | chr3:9943076-9943515      | NA | 0.132  | 9.79E-07        | -0.034 | 1.96E-13        |
| RI | PRPF31   | + | chr19:54129056-54129370   | NA | 0.131  | 0.0001267919825 | -0.006 | 3.97E-05        |
| RI | LDLRAP1  | + | chr1:25563660-25565207    | NA | 0.131  | 0.01068294572   | -0.013 | 1               |
| RI | HTRA2    | + | chr2:74531338-74531702    | NA | 0.13   | 0.001981135288  | -0.122 | 0.001332338633  |
| RI | CDK10    | + | chr16:89693273-89693467   | NA | 0.13   | 0.03804967276   | -0.076 | 0.0139818314    |
| RI | RNF213   | + | chr17:80388611-80389367   | NA | 0.128  | 0.0002137736042 | -0.016 | 2.21E-08        |
| RI | SAT2     | - | chr17:7627362-7627802     | NA | 0.127  | 0.007818289167  | -0.024 | 0               |
| RI | COMMD7   | - | chr20:32702702-32704071   | NA | 0.127  | 2.13E-07        | -0.013 | 5.23E-14        |
| RI | RELT     | + | chr11:73394235-73394734   | NA | 0.126  | 0.001605230086  | 0.001  | 1               |
| RI | CENPT    | - | chr16:67829764-67831358   | NA | 0.126  | 0.03113327069   | -0.02  | 0.007089067466  |
| RI | ASPSCR1  | + | chr17:82016799-82017113   | NA | 0.125  | 0.002774257415  | -0.029 | 2.69E-06        |
| RI | SAT2     | - | chr17:7627362-7627805     | NA | 0.124  | 0.04004330286   | -0.034 | 0.0265299928    |
| RI | ZNF76    | + | chr6:35286127-35286399    | NA | 0.123  | 0.001893949787  | -0.006 | 0.001043272011  |
| RI | BEST1    | + | chr11:61958145-61959578   | NA | 0.12   | 0.0001484207919 | -0.037 | 1               |
| RI | DDIT3    | - | chr12:57517268-57517753   | NA | 0.12   | 0.04122650279   | -0.004 | 0.03653090247   |
| RI | PRPF4B   | + | chr6:4056320-4057187      | NA | 0.118  | 0.0001702677729 | -0.024 | 1.40E-14        |
| RI | EMD      | + | chrX:154379941-154380367  | NA | 0.117  | 2.22E-13        | -0.025 | 0               |
| RI | TTC31    | + | chr2:74490024-74490473    | NA | 0.117  | 0.02129946588   | -0.033 | 0.3483858373    |
| RI | CDK11A   | - | chr1:1704038-1704344      | NA | 0.116  | 0.00555582277   | -0.008 | 0.6643929134    |
| RI | XPNPEP1  | - | chr10:109875527-109877867 | NA | 0.116  | 0.001120005346  | -0.006 | 0.03012675355   |
| RI | UBXN1    | - | chr11:62676497-62677005   | NA | 0.114  | 5.34E-05        | -0.008 | 2.69E-06        |
| RI | C1orf35  | - | chr1:228102079-228102382  | NA | 0.111  | 0.007696141702  | -0.057 | 4.08E-09        |
| RI | C5orf42  | - | chr5:37139339-37142480    | NA | 0.11   | 3.58E-13        | -0.009 | 0.004241921815  |
| RI | NOP56    | + | chr20:2657080-2658393     | NA | 0.109  | 0.001723300719  | -0.009 | 0.000914828258  |
| RI | ULK3     | - | chr15:74842074-74842420   | NA | 0.109  | 0.0146694743    | -0.038 | 4.93E-08        |
| RI | SYVN1    | - | chr11:65132247-65132780   | NA | 0.109  | 3.46E-07        | -0.016 | 6.51E-12        |
| RI | FAM219B  | - | chr15:74899991-74902786   | NA | 0.109  | 0.02030767124   | 0.027  | 0.03057139956   |
| RI | CDK5RAP3 | + | chr17:47973518-47974031   | NA | 0.107  | 6.43E-06        | -0.009 | 1.28E-11        |
| RI | PIAS3    | - | chr1:145848521-145850269  | NA | 0.106  | 0.0095896582    | 0.001  | 1               |
| RI | MED22    | - | chr9:133340904-133344333  | NA | 0.106  | 2.59E-06        | 0.214  | 0               |
| RI | BBS1     | + | chr11:66515692-66515933   | NA | 0.106  | 0.02792705927   | -0.019 | 5.27E-09        |
| RI | MOSPD3   | + | chr7:100612729-100613269  | NA | 0.105  | 0.005192877926  | -0.003 | 0.0038948208    |
| RI | SLC12A4  | - | chr16:67945086-67945553   | NA | 0.105  | 0.03906439299   | -0.014 | 2.48E-15        |
| RI | EIF2B5   | + | chr3:184143051-184143565  | NA | 0.105  | 0.01970885861   | -0.041 | 7.77E-05        |
| RI | RGL2     | - | chr6:33293794-33294066    | NA | 0.105  | 0.000485827391  | -0.045 | 0               |
| RI | OGT      | + | chrX:71544566-71548023    | NA | 0.104  | 1.60E-05        | -0.005 | 1               |
| RI | DGKA     | + | chr12:55940081-55940722   | NA | 0.103  | 0.001744039268  | -0.059 | 0               |
| RI | SPAG5    | - | chr17:28579750-28580120   | NA | -0.101 | 2.69E-09        | -0.024 | 2.62E-06        |
| RI | BTN3A2   | + | chr6:26373275-26373413    | NA | -0.101 | 0.001925892701  | -0.005 | 1               |
| RI | RBM25    | + | chr14:73110830-73111802   | NA | -0.103 | 0.01817881467   | -0.01  | 0.08530603406   |
| RI | C3orf17  | - | chr3:113012733-113013403  | NA | -0.103 | 0.0006844104956 | -0.007 | 0.04836579501   |
| RI | TIMM21   | + | chr18:74155144-74155403   | NA | -0.104 | 0.0006993832697 | 0.001  | 0.1088174894    |
| RI | RBM41    | - | chrX:107088435-107088839  | NA | -0.104 | 0.0003658835225 | 0      | 1               |
| RI | ARL6IP4  | + | chr12:122981128-122981879 | NA | -0.104 | 0.001961330751  | -0.033 | 6.01E-08        |
| RI | RNH1     | - | chr11:499014-499999       | NA | -0.105 | 0.0006770723973 | -0.01  | 0               |
| RI | DDX46    | + | chr5:134816429-134817714  | NA | -0.105 | 0.0003968948543 | 0.007  | 1               |
| RI | EXOSC8   | + | chr13:37002933-37004561   | NA | -0.106 | 7.73E-06        | -0.002 | 1               |
| RI | RPAIN    | + | chr17:5425970-5428211     | NA | -0.106 | 0.002482770348  | -0.027 | 0               |
| RI | POP5     | - | chr12:120579513-120579923 | NA | -0.106 | 0.002482369946  | -0.025 | 4.93E-12        |
| RI | NIT2     | + | chr3:100345584-100346255  | NA | -0.108 | 0.0002330445727 | -0.005 | 0.7014034958    |
| RI | TAMM41   | - | chr3:11807832-11809682    | NA | -0.108 | 6.68E-13        | -0.042 | 0               |
| RI | MCM7     | - | chr7:100099022-100099753  | NA | -0.108 | 0               | -0.002 | 0.1176138885    |
| RI | ARAP1    | - | chr11:72712437-72713243   | NA | -0.108 | 0.008307631995  | -0.042 | 0               |
| RI | GALE     | - | chr1:23798116-23798730    | NA | -0.109 | 0.0001267152438 | -0.022 | 6.08E-07        |
| RI | C11orf57 | + | chr11:112074315-112074916 | NA | -0.109 | 0.04557377175   | -0.009 | 0.5437975795    |
| RI | TMEM208  | + | chr16:67228796-67229278   | NA | -0.109 | 0.0002668533231 | 0.008  | 0.4610517445    |
| RI | PRPF4B   | + | chr6:4060412-4061147      | NA | -0.11  | 4.91E-05        | 0.023  | 0.0002323265305 |
| RI | ACAD11   | - | chr3:132578795-132579558  | NA | -0.11  | 0.00157883001   | -0.055 | 0.003829939189  |
| RI | GALE     | - | chr1:23796508-23796782    | NA | -0.111 | 0.01001845849   | -0.044 | 3.88E-08        |
| RI | YBX3     | - | chr12:10709907-10713333   | NA | -0.112 | 1.32E-07        | -0.003 | 0.024518083     |

|    |          |   |                           |    |        |                 |        |                 |
|----|----------|---|---------------------------|----|--------|-----------------|--------|-----------------|
| RI | NEK8     | + | chr17:28737305-28737736   | NA | -0.113 | 0.0180385365    | -0.145 | 1               |
| RI | ELP5     | + | chr17:7258587-7259940     | NA | -0.113 | 0.0002144640796 | 0.007  | 0.001423666323  |
| RI | SPATA7   | + | chr14:88427629-88429463   | NA | -0.114 | 0.01608781478   | -0.007 | 0.2948560283    |
| RI | PILRB    | + | chr7:100353372-100354012  | NA | -0.115 | 0.04986683364   | -0.014 | 0.1987536026    |
| RI | CAPRIN2  | - | chr12:30719078-30720915   | NA | -0.116 | 0.02160256185   | -0.022 | 0.001718528215  |
| RI | COMMD3   | + | chr10:22318271-22318713   | NA | -0.116 | 0.0002480556874 | -0.014 | 1.37E-10        |
| RI | PTGES2   | - | chr9:128122361-128123134  | NA | -0.117 | 0.02567180123   | 0.016  | 0.669622968     |
| RI | DERL2    | - | chr17:5481100-5481389     | NA | -0.118 | 0.01314365759   | 0.017  | 1               |
| RI | MTX1     | + | chr1:155210547-155212219  | NA | -0.118 | 0.0001735682727 | -0.036 | 1.61E-14        |
| RI | RPP21    | + | chr6:30345297-30346557    | NA | -0.118 | 1.90E-06        | -0.002 | 0.06402147554   |
| RI | DDX39A   | - | chr19:14409741-14410334   | NA | -0.119 | 0.002219711602  | -0.004 | 0.9200018801    |
| RI | NKTR     | + | chr3:42619019-42619708    | NA | -0.12  | 0.02667604946   | 0.003  | 1               |
| RI | WDR45    | - | chrX:49076644-49077911    | NA | -0.12  | 0.01992583731   | 0.012  | 0.5739021329    |
| RI | LRRC41   | - | chr1:46279181-46279614    | NA | -0.122 | 0.0001182452421 | -0.007 | 0.004490061065  |
| RI | MIF4GD   | - | chr17:75267745-75268192   | NA | -0.123 | 0.001166852681  | -0.031 | 4.23E-10        |
| RI | SLC25A3  | + | chr12:98593974-98595848   | NA | -0.124 | 3.27E-10        | -0.004 | 6.96E-07        |
| RI | EXOSC9   | + | chr4:121813865-121816447  | NA | -0.124 | 9.95E-08        | -0.007 | 0.01466038292   |
| RI | TJAP1    | + | chr6:43500743-43501687    | NA | -0.124 | 0.005092959178  | -0.018 | 0.01770379103   |
| RI | NAGK     | + | chr2:71072640-71073594    | NA | -0.128 | 0.000164408632  | -0.028 | 0               |
| RI | STAT2    | - | chr12:56354777-56355351   | NA | -0.129 | 0.01748877641   | -0.125 | 8.90E-06        |
| RI | DRG2     | + | chr17:18099016-18100435   | NA | -0.13  | 6.99E-07        | 0      | 0.2576807227    |
| RI | IKBKB    | + | chr8:42319269-42320844    | NA | -0.132 | 0.01928890763   | 0.078  | 2.48E-15        |
| RI | PIDD1    | - | chr11:800761-801120       | NA | -0.135 | 0.007244724238  | -0.001 | 1               |
| RI | ETV4     | - | chr17:43545273-43545668   | NA | -0.136 | 2.47E-06        | -0.029 | 1               |
| RI | TCF4     | - | chr18:55228846-55232671   | NA | -0.136 | 0.000666479782  | -0.013 | 1.46E-08        |
| RI | E2F4     | + | chr16:67192760-67193170   | NA | -0.136 | 9.34E-06        | -0.042 | 2.32E-05        |
| RI | HDLBP    | - | chr2:241268953-241269295  | NA | -0.137 | 0.04657411543   | 0.12   | 1               |
| RI | MFN1     | + | chr3:179378340-179378814  | NA | -0.137 | 4.80E-10        | -0.005 | 0.1793576111    |
| RI | POLR1C   | + | chr6:43519705-43520185    | NA | -0.137 | 0.006280059241  | -0.027 | 5.93E-05        |
| RI | SRSF7    | - | chr2:38748578-38749705    | NA | -0.138 | 2.58E-05        | 0.007  | 0.9650266323    |
| RI | QTRT1    | + | chr19:10701949-10702254   | NA | -0.138 | 0.001162103423  | -0.025 | 0               |
| RI | NELFE    | - | chr6:31954554-31955096    | NA | -0.139 | 0.01266779508   | 0.026  | 0.2484620488    |
| RI | KRIT1    | - | chr7:92235402-92236542    | NA | -0.14  | 9.18E-06        | -0.005 | 0.6493889757    |
| RI | C2orf49  | + | chr2:105342847-105343223  | NA | -0.14  | 0.001365874141  | 0.01   | 1               |
| RI | TPM1     | + | chr15:63061197-63062277   | NA | -0.14  | 1.57E-11        | -0.024 | 0               |
| RI | FUS      | + | chr16:31184938-31188357   | NA | -0.141 | 6.33E-13        | 0.008  | 1               |
| RI | PNKP     | - | chr19:49864178-49864403   | NA | -0.142 | 0.0095896582    | -0.039 | 7.98E-05        |
| RI | CIRBP    | + | chr19:1271980-1274440     | NA | -0.142 | 5.48E-11        | 0.001  | 1               |
| RI | ZNF232   | - | chr17:5108925-5109868     | NA | -0.142 | 0.02997087908   | -0.117 | 6.68E-07        |
| RI | ILF3     | + | chr19:10681218-10682192   | NA | -0.143 | 1.78E-07        | -0.016 | 0.09343721961   |
| RI | FAM200B  | + | chr4:15686235-15687148    | NA | -0.143 | 0.02854546606   | 0.018  | 1               |
| RI | ANAPC5   | - | chr12:121327095-121328497 | NA | -0.144 | 0               | 0.006  | 0.05237580454   |
| RI | ANAPC5   | - | chr12:121345838-121347005 | NA | -0.144 | 0               | 0.013  | 1.05E-08        |
| RI | C18orf8  | + | chr18:23530228-23530612   | NA | -0.144 | 0.004901189048  | 0      | 1               |
| RI | NELFE    | - | chr6:31953728-31954134    | NA | -0.144 | 1.11E-09        | -0.013 | 0.0002534816591 |
| RI | BTN3A1   | + | chr6:26409893-26410032    | NA | -0.15  | 5.62E-08        | -0.038 | 5.81E-06        |
| RI | SCYL1    | + | chr11:65538269-65538704   | NA | -0.15  | 0.005191038741  | -0.045 | 0.07108288609   |
| RI | CLK3     | + | chr15:74622119-74622560   | NA | -0.15  | 1.92E-06        | -0.007 | 0.2069400463    |
| RI | BAZ2A    | - | chr12:56615013-56615607   | NA | -0.151 | 1.89E-10        | -0.003 | 1               |
| RI | LMNA     | + | chr1:156137653-156138757  | NA | -0.152 | 0.001867343234  | -0.045 | 0.0001998731416 |
| RI | WDR46    | - | chr6:33280427-33280987    | NA | -0.152 | 6.22E-06        | 0.005  | 1               |
| RI | ATG16L1  | + | chr2:233289853-233290353  | NA | -0.153 | 0.03527976138   | -0.02  | 0.08041337484   |
| RI | TTC8     | + | chr14:88841036-88841514   | NA | -0.153 | 0.002168953809  | 0.005  | 1               |
| RI | B4GALNT1 | - | chr12:57631199-57631364   | NA | -0.155 | 0.000336563563  | 0.024  | 5.47E-12        |
| RI | PCNXL2   | - | chr1:232984135-232986540  | NA | -0.155 | 0.006928555429  | -0.084 | 1.63E-09        |
| RI | HAUS7    | - | chrX:153454393-153455766  | NA | -0.157 | 1.59E-09        | -0.002 | 0.7311315753    |
| RI | HDAC6    | + | chrX:48814961-48815490    | NA | -0.158 | 0.04960482811   | -0.048 | 0.01542143747   |
| RI | RBM33    | + | chr7:155738059-155740026  | NA | -0.159 | 0.003244746418  | -0.008 | 1               |
| RI | CDCA7    | + | chr2:173363817-173364989  | NA | -0.16  | 0.01251638125   | -0.014 | 0.01265986631   |
| RI | HNRNPM   | + | chr19:8465323-8465515     | NA | -0.161 | 7.93E-08        | -0.006 | 1               |
| RI | NAGK     | + | chr2:71075554-71076701    | NA | -0.162 | 0.006239792161  | -0.007 | 2.75E-06        |
| RI | EOGT     | - | chr3:68988505-68989017    | NA | -0.162 | 0.04266975874   | -0.058 | 0.3511442743    |
| RI | C5orf45  | - | chr5:179837275-179840959  | NA | -0.163 | 0.005154888944  | 0.015  | 1               |



|    |           |   |                           |    |        |                 |        |                 |
|----|-----------|---|---------------------------|----|--------|-----------------|--------|-----------------|
| RI | NKIRAS2   | + | chr17:42022398-42022640   | NA | -0.163 | 5.64E-05        | -0.007 | 0.2847463068    |
| RI | RPS27     | + | chr1:153990762-153991034  | NA | -0.166 | 2.22E-10        | -0.016 | 0.007689539258  |
| RI | ORC2      | - | chr2:200913294-200913992  | NA | -0.167 | 0.01229678921   | -0.011 | 0.7308035463    |
| RI | CD274     | + | chr9:5462833-5463121      | NA | -0.167 | 0.0004473236184 | -0.003 | 1               |
| RI | RSRP1     | - | chr1:25243549-25245301    | NA | -0.168 | 0               | 0.027  | 0.9699067261    |
| RI | ORMDL1    | - | chr2:189782421-189783123  | NA | -0.168 | 0.002200528562  | -0.017 | 0.8767054258    |
| RI | UBXN4     | + | chr2:135753538-135754277  | NA | -0.168 | 8.43E-07        | -0.023 | 2.57E-09        |
| RI | TSEN2     | + | chr3:12529761-12531659    | NA | -0.169 | 0               | 0.026  | 0.008442343124  |
| RI | CCAR2     | + | chr8:22619149-22620468    | NA | -0.169 | 0.001791555223  | -0.013 | 4.85E-09        |
| RI | CAD       | + | chr2:27233311-27233808    | NA | -0.17  | 0.005154888944  | -0.071 | 2.10E-10        |
| RI | THAP7     | - | chr22:21000646-21001411   | NA | -0.17  | 5.29E-05        | -0.094 | 0               |
| RI | AKNA      | - | chr9:114343707-114346009  | NA | -0.174 | 0.005410896005  | -0.006 | 0.08557171304   |
| RI | NSD1      | + | chr5:177135086-177136030  | NA | -0.175 | 0.0001641005066 | 0.022  | 1               |
| RI | DECR2     | + | chr16:406684-406952       | NA | -0.175 | 0.03089148023   | -0.029 | 1               |
| RI | CHKB      | - | chr22:50580189-50580416   | NA | -0.177 | 0.0007579141903 | -0.068 | 4.74E-05        |
| RI | BRAT1     | - | chr7:2539785-2541052      | NA | -0.181 | 0.02743375478   | -0.037 | 2.72E-08        |
| RI | SNX15     | + | chr11:65035519-65038829   | NA | -0.182 | 2.03E-05        | 0      | 0.4979325872    |
| RI | TANC1     | + | chr2:159219237-159219867  | NA | -0.182 | 0.01003146764   | -0.033 | 0.07769260489   |
| RI | NOC3L     | - | chr10:94357173-94358215   | NA | -0.182 | 0               | -0.007 | 1               |
| RI | PACS2     | + | chr14:105383358-105384463 | NA | -0.184 | 1.17E-07        | -0.001 | 1               |
| RI | TMEM138   | + | chr11:61364249-61364518   | NA | -0.186 | 0.0003481439514 | -0.006 | 0.5105583676    |
| RI | WDR55     | + | chr5:140668233-140668502  | NA | -0.188 | 3.74E-07        | -0.079 | 1.39E-07        |
| RI | BBS2      | - | chr16:56502316-56502808   | NA | -0.191 | 0               | -0.014 | 1.84E-06        |
| RI | ZSWIM7    | - | chr17:15977578-15977913   | NA | -0.191 | 0.02434367906   | 0.019  | 0.9015479658    |
| RI | FAM3A     | - | chrX:154515759-154516242  | NA | -0.192 | 0.00491760265   | -0.026 | 0.2187702092    |
| RI | COG4      | - | chr16:70508405-70509388   | NA | -0.192 | 1.14E-14        | 0.026  | 0.2730210341    |
| RI | TEN1-CDK3 | + | chr17:76002510-76003398   | NA | -0.193 | 0.01292108692   | 0.026  | 1               |
| RI | RPP30     | + | chr10:90894774-90895483   | NA | -0.194 | 0.0002573288381 | -0.009 | 7.68E-05        |
| RI | PEX1      | - | chr7:92501506-92502079    | NA | -0.198 | 9.31E-05        | -0.034 | 0.03800830747   |
| RI | BPHL      | + | chr6:3138040-3140509      | NA | -0.198 | 0.01313973159   | 0.074  | 0.1329040777    |
| RI | MLST8     | + | chr16:2206357-2206659     | NA | -0.198 | 5.59E-08        | 0.011  | 0.01410214697   |
| RI | RBM8A     | - | chr1:145926481-145927077  | NA | -0.199 | 3.44E-05        | -0.002 | 1               |
| RI | KANSL2    | - | chr12:48681381-48682225   | NA | -0.201 | 4.32E-05        | 0.014  | 8.74E-06        |
| RI | ARHGAP32  | - | chr11:128972452-128975002 | NA | -0.203 | 4.53E-08        | 0.01   | 0.2827202429    |
| RI | CC2D1B    | - | chr1:52357780-52358461    | NA | -0.203 | 0.01047160473   | -0.034 | 5.67E-05        |
| RI | MOK       | - | chr14:102232534-102233789 | NA | -0.205 | 0.0006345139613 | -0.062 | 0.002836188205  |
| RI | N6AMT1    | - | chr21:28872190-28876491   | NA | -0.205 | 0.01873364361   | 0.005  | 1               |
| RI | DUS1L     | - | chr17:82061208-82061721   | NA | -0.208 | 0.002439817932  | -0.018 | 2.92E-14        |
| RI | ADARB1    | + | chr21:45222017-45226560   | NA | -0.208 | 0.002219711602  | -0.04  | 0.4312666656    |
| RI | PEX1      | - | chr7:92492952-92494396    | NA | -0.21  | 2.53E-05        | -0.066 | 0.0003051041912 |
| RI | RPGR      | - | chrX:38287093-38288041    | NA | -0.212 | 1.39E-05        | -0.003 | 1               |
| RI | DET1      | - | chr15:88530622-88531715   | NA | -0.216 | 0.007987937871  | 0.012  | 0.2614932913    |
| RI | WRAP73    | - | chr1:3630766-3631657      | NA | -0.219 | 0.0189131366    | -0.079 | 6.18E-11        |
| RI | FBF1      | - | chr17:75914121-75914932   | NA | -0.219 | 0.01867064045   | -0.04  | 0.0001056579432 |
| RI | NECAB3    | - | chr20:33659884-33660395   | NA | -0.22  | 0.01873719104   | 0.061  | 1               |
| RI | RUSC1     | + | chr1:155325863-155327132  | NA | -0.221 | 0.005394362141  | -0.03  | 0.03198465532   |
| RI | DENND4C   | + | chr9:19336269-19336832    | NA | -0.222 | 9.18E-06        | -0.055 | 1               |
| RI | SREBF1    | - | chr17:17817547-17817916   | NA | -0.223 | 0.01127882976   | -0.032 | 1               |
| RI | HMBS      | + | chr11:119092124-119092523 | NA | -0.227 | 0.03751352006   | -0.071 | 1.69E-05        |
| RI | MPP2      | - | chr17:43882902-43883355   | NA | -0.23  | 8.14E-05        | 0.035  | 1               |
| RI | PINK1     | + | chr1:20648504-20649231    | NA | -0.23  | 2.52E-05        | -0.005 | 0.0003067980742 |
| RI | RPS9      | + | chr19:54206275-54206724   | NA | -0.234 | 0.001162103423  | -0.04  | 0.04059299619   |
| RI | DALRD3    | - | chr3:49015972-49016340    | NA | -0.234 | 0.03426009204   | -0.077 | 2.81E-08        |
| RI | HARS2     | + | chr5:140693490-140693665  | NA | -0.235 | 0.001275168466  | -0.004 | 1               |
| RI | IDH3A     | + | chr15:78156907-78157631   | NA | -0.239 | 0.0001490791649 | -0.053 | 1               |
| RI | C19orf66  | + | chr19:10091249-10091630   | NA | -0.243 | 0.002219711602  | -0.027 | 0.0314046826    |
| RI | NSUN5     | - | chr7:73307582-73308553    | NA | -0.246 | 0.002672952032  | -0.018 | 1               |
| RI | March6    | + | chr5:10400783-10402139    | NA | -0.253 | 4.85E-09        | 0.004  | 1               |
| RI | BDH2      | - | chr4:103085348-103086540  | NA | -0.253 | 0               | 0.013  | 0.4026289619    |
| RI | ISCU      | + | chr12:108564059-108564392 | NA | -0.255 | 3.67E-05        | -0.081 | 0.03298130095   |
| RI | GNRHR2    | + | chr1:145919343-145919900  | NA | -0.257 | 0.002073595908  | -0.002 | 1               |
| RI | CDK20     | - | chr9:87969193-87970897    | NA | -0.259 | 0.0002155787581 | -0.002 | 1               |
| RI | ABTB1     | + | chr3:127676535-127677286  | NA | -0.262 | 0.002857952109  | -0.021 | 9.27E-14        |

|    |          |   |                           |    |        |                 |        |                 |
|----|----------|---|---------------------------|----|--------|-----------------|--------|-----------------|
| RI | AFTPH    | + | chr2:64579485-64581273    | NA | -0.262 | 0.009886221094  | -0.015 | 0.8648963937    |
| RI | MTF2     | + | chr1:93110229-93110428    | NA | -0.264 | 1.02E-07        | -0.007 | 1               |
| RI | POLD1    | + | chr19:50415723-50416528   | NA | -0.266 | 0.005472713134  | -0.069 | 2.48E-15        |
| RI | ENDOV    | + | chr17:80429772-80430343   | NA | -0.266 | 2.91E-05        | -0.03  | 1               |
| RI | NPHP1    | - | chr2:110163047-110164730  | NA | -0.268 | 0.01528618861   | -0.134 | 0.05663681961   |
| RI | DCXR     | - | chr17:82036858-82037547   | NA | -0.268 | 0.04849882675   | 0.022  | 0.0003818895414 |
| RI | TUBGCP4  | + | chr15:43401715-43403799   | NA | -0.278 | 7.93E-08        | -0.018 | 0.8599833433    |
| RI | PLSCR1   | - | chr3:146521543-146522053  | NA | -0.279 | 1.65E-09        | -0.005 | 1               |
| RI | ATP5SL   | - | chr19:41431318-41433434   | NA | -0.28  | 0.0007734376691 | -0.015 | 0.01736526612   |
| RI | BRAT1    | - | chr7:2543203-2543962      | NA | -0.283 | 9.46E-05        | -0.034 | 3.24E-11        |
| RI | DALRD3   | - | chr3:49015818-49016086    | NA | -0.283 | 0.0001551860719 | -0.102 | 3.08E-09        |
| RI | ABHD11   | - | chr7:73737220-73737735    | NA | -0.285 | 0.0236309712    | -0.141 | 4.76E-09        |
| RI | RPL3     | - | chr22:39313190-39314208   | NA | -0.286 | 0.0007965341189 | 0.033  | 2.47E-10        |
| RI | CEP192   | + | chr18:13057584-13059312   | NA | -0.287 | 0               | 0.009  | 0.09509219872   |
| RI | B4GALT3  | - | chr1:161176433-161177106  | NA | -0.298 | 0.0007328348363 | -0.055 | 1               |
| RI | ARRDC1   | + | chr9:137612895-137613510  | NA | -0.299 | 1.29E-06        | -0.098 | 1.42E-06        |
| RI | C9orf89  | + | chr9:93110567-93112289    | NA | -0.301 | 3.15E-07        | -0.003 | 1               |
| RI | RRNAD1   | + | chr1:156731990-156732473  | NA | -0.303 | 0.000167746949  | -0.098 | 7.76E-10        |
| RI | LIN37    | + | chr19:35753086-35754157   | NA | -0.312 | 0.0007935197621 | -0.014 | 0.002626283484  |
| RI | PIDD1    | - | chr11:802681-803647       | NA | -0.317 | 0.001045349009  | -0.016 | 1               |
| RI | NDUFAF7  | + | chr2:37241577-37242693    | NA | -0.318 | 2.72E-05        | -0.044 | 0.1580231666    |
| RI | RPS9     | + | chr19:54206552-54207647   | NA | -0.319 | 6.28E-05        | -0.042 | 0.04129831848   |
| RI | SUGP2    | - | chr19:18994365-18995280   | NA | -0.322 | 1.97E-13        | 0.02   | 0.2272518209    |
| RI | MAEA     | + | chr4:1336860-1338617      | NA | -0.323 | 0.01580040133   | 0.021  | 0.2669472176    |
| RI | RPL17    | - | chr18:49491531-49491833   | NA | -0.324 | 0               | 0.016  | 0.0002667903333 |
| RI | CLK4     | - | chr5:178616881-178618778  | NA | -0.325 | 0.00639004427   | 0.011  | 1               |
| RI | SLC9A5   | + | chr16:67255392-67255930   | NA | -0.326 | 0.0072366921    | 0.07   | 1               |
| RI | PLEKHH2  | + | chr2:43710488-43712383    | NA | -0.327 | 0.0005898240881 | -0.013 | 1               |
| RI | MIIP     | + | chr1:12029222-12030124    | NA | -0.328 | 0.008465546508  | -0.024 | 1.32E-08        |
| RI | HMG1     | - | chr21:39345145-39348339   | NA | -0.329 | 1.73E-12        | -0.028 | 0               |
| RI | NAPRT    | - | chr8:143576077-143576572  | NA | -0.331 | 0.03947238461   | -0.012 | 5.15E-05        |
| RI | U2AF1L4  | - | chr19:35744322-35745187   | NA | -0.332 | 0.0095896582    | 0.107  | 0.001914407062  |
| RI | CLK4     | - | chr5:178617343-178618778  | NA | -0.336 | 9.82E-08        | 0.046  | 0.002583436711  |
| RI | MAN2C1   | - | chr15:75358461-75358808   | NA | -0.337 | 1.41E-12        | -0.015 | 0.1499871015    |
| RI | WDR45    | - | chrX:49076644-49077911    | NA | -0.337 | 0.0006389898037 | 0.034  | 0.7736195789    |
| RI | KCNAB3   | - | chr17:7923967-7924265     | NA | -0.341 | 0.002842735607  | 0.072  | 1               |
| RI | RBM6     | + | chr3:50061461-50062108    | NA | -0.347 | 1.98E-07        | 0.014  | 1               |
| RI | MAMDC4   | + | chr9:136856463-136856826  | NA | -0.348 | 0.0271123135    | -0.044 | 1               |
| RI | EWSR1    | + | chr22:29298732-29299280   | NA | -0.354 | 9.93E-05        | -0.018 | 1               |
| RI | PRPF40B  | + | chr12:49631859-49632880   | NA | -0.355 | 4.01E-05        | 0.112  | 0.0003839233133 |
| RI | COMMD4   | + | chr15:75338984-75339878   | NA | -0.366 | 6.58E-07        | 0.025  | 0.003388821628  |
| RI | NAPEPLD  | - | chr7:103099775-103103554  | NA | -0.376 | 0.002761239845  | 0.026  | 1.53E-05        |
| RI | ZNF10    | + | chr12:133130610-133131014 | NA | -0.378 | 0.02210096143   | 0.074  | 1               |
| RI | CLK1     | - | chr2:200859679-200861466  | NA | -0.38  | 5.85E-11        | -0.049 | 0.3040324742    |
| RI | AMBRA1   | - | chr11:46541944-46543398   | NA | -0.38  | 8.95E-05        | -0.008 | 1               |
| RI | CYB5R2   | - | chr11:7668477-7672523     | NA | -0.382 | 0.003244746418  | 0.051  | 1               |
| RI | ALDH3B1  | + | chr11:68015296-68018637   | NA | -0.385 | 0.01778902412   | -0.003 | 1               |
| RI | MED23    | - | chr6:131592387-131593171  | NA | -0.386 | 0.0008916825081 | -0.017 | 0.0111019012    |
| RI | SH3TC2   | - | chr5:149026859-149028718  | NA | -0.387 | 8.54E-05        | 0.117  | 1               |
| RI | MATR3    | + | chr5:139314674-139316188  | NA | -0.388 | 8.68E-14        | -0.028 | 1               |
| RI | NUDT17   | + | chr1:145846432-145846690  | NA | -0.388 | 0.0002993961125 | -0.051 | 0.1983694294    |
| RI | SIRT7    | - | chr17:81914293-81915512   | NA | -0.388 | 8.29E-05        | -0.041 | 6.14E-06        |
| RI | CCHCR1   | - | chr6:31144686-31145073    | NA | -0.388 | 2.14E-05        | -0.019 | 0.5164150801    |
| RI | LLGL1    | + | chr17:18235469-18236760   | NA | -0.389 | 0.01561183787   | 0.001  | 1               |
| RI | DPH1     | + | chr17:2041767-2043424     | NA | -0.39  | 0.0004699056745 | -0.013 | 0.709521158     |
| RI | ARHGEF40 | + | chr14:21087000-21087463   | NA | -0.404 | 0.0005943848687 | -0.085 | 4.06E-12        |
| RI | TRABD    | + | chr22:50197822-50198186   | NA | -0.409 | 0.000651342608  | -0.102 | 1.24E-05        |
| RI | SAMD4A   | + | chr14:54784339-54784620   | NA | -0.417 | 0.002500459043  | -0.035 | 1               |
| RI | MTMR11   | - | chr1:149930364-149930965  | NA | -0.421 | 0.000164408632  | -0.048 | 0.02194223989   |
| RI | CENPT    | - | chr16:67832011-67832545   | NA | -0.428 | 8.43E-08        | 0.028  | 9.59E-08        |
| RI | CENPT    | - | chr16:67832011-67832545   | NA | -0.43  | 0.0004376056157 | -0.076 | 1               |
| RI | MINK1    | + | chr17:4889646-4890735     | NA | -0.431 | 0.001258786667  | -0.03  | 0.007493007502  |
| RI | CCDC136  | + | chr7:128806236-128806858  | NA | -0.455 | 1.38E-05        | -0.008 | 1               |

|    |           |   |                           |    |        |                 |        |                |
|----|-----------|---|---------------------------|----|--------|-----------------|--------|----------------|
| RI | CPSF3L    | - | chr1:1312225-1312700      | NA | -0.462 | 0.01464113754   | 0.069  | 0.04946945316  |
| RI | BCKDK     | + | chr16:31110400-31111219   | NA | -0.469 | 3.95E-07        | 0.093  | 0.05338492089  |
| RI | RP11-295P | + | chr10:13654352-13655482   | NA | -0.475 | 0.0001735682727 | -0.027 | 1              |
| RI | CD46      | + | chr1:207767012-207770362  | NA | -0.477 | 0               | -0.142 | 3.34E-09       |
| RI | CLK4      | - | chr5:178616881-178618778  | NA | -0.481 | 1.16E-13        | 0.042  | 0.09158095123  |
| RI | RCHY1     | - | chr4:75490580-75491782    | NA | -0.482 | 0.003299762828  | -0.007 | 1              |
| RI | CTC-308K2 | - | chr5:172957153-172958257  | NA | -0.484 | 1.27E-07        | 0.013  | 0.6521013934   |
| RI | RABGGTA   | - | chr14:24270836-24271169   | NA | -0.487 | 0.004579326249  | -0.048 | 1              |
| RI | DDX51     | - | chr12:132140830-132141420 | NA | -0.49  | 7.41E-06        | 0.002  | 0.6720834607   |
| RI | NUDT8     | - | chr11:67628918-67629921   | NA | -0.504 | 0.000634117199  | -0.013 | 1              |
| RI | POLD1     | + | chr19:50401998-50402373   | NA | -0.509 | 0.003199637451  | -0.022 | 0.005934433671 |
| RI | PHF7      | + | chr3:52421647-52422881    | NA | -0.515 | 0.0004977363804 | -0.087 | 1              |
| RI | TERF2     | - | chr16:69368375-69368595   | NA | -0.523 | 1.08E-05        | -0.018 | 1              |
| RI | FAH       | + | chr15:80152793-80153135   | NA | -0.544 | 3.92E-08        | -0.093 | 0.7285943532   |
| RI | TLE2      | - | chr19:3019282-3019773     | NA | -0.546 | 1.93E-05        | -0.039 | 1              |
| RI | BCL3      | + | chr19:44758245-44758841   | NA | -0.546 | 0.0007097597659 | -0.014 | 1.07E-05       |
| RI | A1BG-AS1  | + | chr19:58353713-58355183   | NA | -0.563 | 1.09E-06        | -0.04  | 0.3358816376   |
| RI | GNG5      | - | chr1:84506010-84506565    | NA | -0.566 | 0.0005832107347 | -0.021 | 1              |
| RI | EPS8L2    | + | chr11:709552-710486       | NA | -0.571 | 1.48E-06        | -0.059 | 1              |
| RI | WDR83     | + | chr19:12669754-12670080   | NA | -0.576 | 5.75E-06        | -0.017 | 0.9366484804   |
| RI | NAGS      | + | chr17:44006528-44007494   | NA | -0.583 | 2.47E-09        | 0.099  | 0.03185542832  |
| RI | CROCCP3   | - | chr1:16476929-16478437    | NA | -0.584 | 3.92E-05        | 0.04   | 1              |
| RI | IMP4      | + | chr2:130342893-130343194  | NA | -0.588 | 0.004901189048  | -0.062 | 0.1505246326   |
| RI | CCDC57    | - | chr17:82193755-82194139   | NA | -0.603 | 0.001120005346  | -0.052 | 1              |
| RI | DNHD1     | + | chr11:6497584-6498961     | NA | -0.604 | 1.49E-08        | 0.005  | 1              |
| RI | MYO15B    | + | chr17:75590906-75591246   | NA | -0.606 | 0.0004401943641 | 0.024  | 1              |
| RI | TPM2      | - | chr9:35684487-35685139    | NA | -0.633 | 3.04E-07        | -0.018 | 1              |
| RI | THOP1     | + | chr19:2807441-2808444     | NA | -0.64  | 0.0001902823536 | -0.023 | 3.65E-06       |
| RI | MLST8     | + | chr16:2206357-2206659     | NA | -0.766 | 1.14E-14        | 0.026  | 0.4706446529   |
| SE | HDHD1     | - | chrX:7105748-7105838      | NA | 1      | 0               | 0.003  | 1              |
| SE | PIP5K1C   | - | chr19:3633436-3633520     | NA | 0.96   | 3.34E-13        | 0.136  | 7.35E-10       |
| SE | SORBS1    | - | chr10:95434621-95434717   | NA | 0.934  | 3.34E-13        | 0.047  | 0.3523006826   |
| SE | USP3-AS1  | - | chr15:63593748-63593877   | NA | 0.925  | 4.00E-12        | 0.25   | 1              |
| SE | CLIP1     | - | chr12:122351110-122351143 | NA | 0.924  | 2.89E-14        | 0.03   | 1              |
| SE | ANKAR     | + | chr2:189693073-189693177  | NA | 0.91   | 1.34E-13        | 0.004  | 1              |
| SE | SRGAP1    | + | chr12:64091892-64091926   | NA | 0.904  | 2.23E-09        | 0.001  | 1              |
| SE | BTN3A3    | + | chr6:26443366-26443442    | NA | 0.881  | 5.48E-12        | 0.061  | 1              |
| SE | RPS24     | + | chr10:78040203-78040225   | NA | 0.876  | 0               | 0.028  | 0              |
| SE | ANKRD36   | + | chr2:97209680-97209709    | NA | 0.869  | 1.65E-11        | 0.007  | 1              |
| SE | RP4-798P1 | - | chr1:177984205-177984418  | NA | 0.86   | 9.70E-11        | 0.02   | 1              |
| SE | SYTL2     | - | chr11:85717482-85717726   | NA | 0.857  | 0               | -0.047 | 1              |
| SE | PCBP1-AS1 | - | chr2:70053730-70053815    | NA | 0.84   | 2.34E-11        | 0      | 1              |
| SE | ZNF83     | - | chr19:52617245-52617335   | NA | 0.838  | 6.02E-06        | 0.159  | 1              |
| SE | DST       | - | chr6:56468981-56468999    | NA | 0.827  | 0               | 0.001  | 0.01236024759  |
| SE | RAPGEF2   | + | chr4:159344035-159344059  | NA | 0.824  | 0               | 0.052  | 1              |
| SE | ATP2A1    | + | chr16:28894504-28894607   | NA | 0.824  | 1.09E-07        | -0.085 | 1              |
| SE | VPS9D1    | - | chr16:89708426-89708531   | NA | 0.817  | 0.002386013963  | -0.011 | 1              |
| SE | CLASP2    | - | chr3:33596710-33596734    | NA | 0.815  | 4.89E-12        | 0.076  | 1              |
| SE | FUBP1     | - | chr1:77947452-77947547    | NA | 0.814  | 7.18E-09        | 0      | 1              |
| SE | PLEKHA1   | + | chr10:122428275-122428420 | NA | 0.806  | 0               | 0.018  | 1              |
| SE | SBF1      | - | chr22:50457033-50457111   | NA | 0.784  | 2.68E-09        | 0.013  | 1              |
| SE | PLEKHA1   | + | chr10:122428275-122428316 | NA | 0.778  | 0               | -0.002 | 1              |
| SE | SORBS1    | - | chr10:95414493-95414655   | NA | 0.777  | 9.52E-08        | -0.107 | 1              |
| SE | PPFIBP1   | + | chr12:27658815-27658848   | NA | 0.773  | 0               | 0.101  | 1              |
| SE | SLC9A5    | + | chr16:67262211-67262289   | NA | 0.773  | 3.90E-10        | -0.088 | 1              |
| SE | TLE2      | - | chr19:3017839-3017859     | NA | 0.769  | 3.07E-10        | -0.033 | 0.1059516518   |
| SE | KIF21A    | - | chr12:39330241-39330262   | NA | 0.766  | 0               | 0.223  | 1              |
| SE | SYTL2     | - | chr11:85717482-85717530   | NA | 0.76   | 0               | -0.014 | 0.4684459028   |
| SE | SPTAN1    | + | chr9:128609650-128609665  | NA | 0.759  | 0               | 0.102  | 3.38E-08       |
| SE | WDFY3     | - | chr4:84726860-84726911    | NA | 0.733  | 0               | -0.011 | 1              |
| SE | SPAG9     | - | chr17:50975862-50975901   | NA | 0.73   | 0               | -0.003 | 1              |
| SE | PRMT2     | + | chr21:46636438-46636547   | NA | 0.729  | 0               | 0.067  | 0.2319464078   |
| SE | XRR1      | - | chr11:74940784-74940882   | NA | 0.728  | 5.96E-06        | 0.119  | 1              |

|    |            |   |                           |    |       |                 |        |                 |   |
|----|------------|---|---------------------------|----|-------|-----------------|--------|-----------------|---|
| SE | ZNF706     | - | chr8:101204649-101204693  | NA | 0.718 | 1.02E-09        | 0.046  |                 | 1 |
| SE | MRPL43     | - | chr10:100983947-100984074 | NA | 0.71  | 6.77E-07        | -0.039 |                 | 1 |
| SE | ZNF391     | + | chr6:27395016-27395095    | NA | 0.698 | 7.31E-07        | -0.199 |                 | 1 |
| SE | CAST       | + | chr5:96726793-96726859    | NA | 0.698 | 0               | 0.031  |                 | 1 |
| SE | SUZ12P1    | + | chr17:30734896-30734943   | NA | 0.696 | 5.79E-08        | 0.022  |                 | 1 |
| SE | MED24      | - | chr17:40020527-40020619   | NA | 0.695 | 1.34E-05        | 0.043  |                 | 1 |
| SE | MICAL3     | - | chr22:17803810-17803861   | NA | 0.695 | 9.30E-11        | 0.081  | 0.9403152009    |   |
| SE | NEXN       | + | chr1:77925187-77925229    | NA | 0.687 | 4.41E-07        | -0.062 |                 | 1 |
| SE | CENPV      | - | chr17:16349139-16349333   | NA | 0.682 | 5.11E-08        | -0.063 | 0.9854954385    |   |
| SE | RP11-274B2 | + | chr7:128577963-128578033  | NA | 0.682 | 1.63E-09        | 0.03   |                 | 1 |
| SE | SORBS1     | - | chr10:95414493-95414862   | NA | 0.681 | 1.03E-06        | -0.112 |                 | 1 |
| SE | HLA-L      | + | chr6:30262294-30262342    | NA | 0.674 | 0.0001824986839 | -0.02  |                 | 1 |
| SE | MAP3K6     | - | chr1:27364660-27364684    | NA | 0.66  | 0.0001833146153 | 0.005  |                 | 1 |
| SE | FHL2       | - | chr2:105396646-105396697  | NA | 0.659 | 1.87E-07        | -0.054 |                 | 1 |
| SE | MYO18A     | - | chr17:29085603-29085648   | NA | 0.652 | 0               | 0.031  |                 | 1 |
| SE | PLD3       | + | chr19:40365552-40365585   | NA | 0.65  | 3.15E-06        | 0.038  |                 | 1 |
| SE | CACNB4     | - | chr2:151869176-151869235  | NA | 0.65  | 7.65E-06        | -0.057 |                 | 1 |
| SE | GPM6A      | - | chr4:175812190-175812249  | NA | 0.649 | 2.67E-10        | 0.168  | 2.56E-10        |   |
| SE | C19orf60   | + | chr19:18589478-18589683   | NA | 0.647 | 1.65E-09        | -0.02  | 0.02956170982   |   |
| SE | NQO1       | - | chr16:69714963-69715077   | NA | 0.647 | 0               | -0.019 | 0.3824801379    |   |
| SE | ABI1       | - | chr10:26771074-26771089   | NA | 0.644 | 0               | 0.038  | 0.8846931441    |   |
| SE | RSRP1      | - | chr1:25244453-25244498    | NA | 0.639 | 0               | -0.024 |                 | 1 |
| SE | SYNJ1      | - | chr21:32634860-32634884   | NA | 0.634 | 4.13E-11        | 0.12   | 3.29E-05        |   |
| SE | EFCAB13    | + | chr17:47347807-47347951   | NA | 0.634 | 3.12E-05        | 0.039  |                 | 1 |
| SE | PNISR      | - | chr6:99403828-99403882    | NA | 0.633 | 0               | -0.005 | 0.8137340216    |   |
| SE | VLDLR      | + | chr9:2651414-2651498      | NA | 0.626 | 0               | 0.005  |                 | 1 |
| SE | DNAJC7     | - | chr17:42003358-42003557   | NA | 0.624 | 2.54E-07        | 0.03   |                 | 1 |
| SE | UBA3       | - | chr3:69071534-69071617    | NA | 0.622 | 0.001965233616  | -0.054 | 1.51E-07        |   |
| SE | DGKH       | + | chr13:42221263-42221394   | NA | 0.615 | 4.55E-07        | 0.211  |                 | 1 |
| SE | CTD-2341M  | + | chr14:86128664-86128773   | NA | 0.612 | 5.70E-05        | -0.013 |                 | 1 |
| SE | PAQR3      | - | chr4:78935120-78935176    | NA | 0.61  | 2.01E-05        | -0.076 | 0.0001321555703 |   |
| SE | CASK       | - | chrX:41557031-41557100    | NA | 0.608 | 4.65E-08        | 0.034  |                 | 1 |
| SE | GUSBP11    | - | chr22:23700725-23700845   | NA | 0.608 | 8.54E-06        | 0.005  |                 | 1 |
| SE | FUBP1      | - | chr1:77947452-77947552    | NA | 0.606 | 5.11E-05        | -0.001 |                 | 1 |
| SE | BCAS4      | + | chr20:50840536-50840930   | NA | 0.605 | 0               | -0.124 | 0.0005746395579 |   |
| SE | TNIK       | - | chr3:171139469-171139556  | NA | 0.604 | 3.94E-11        | 0.077  |                 | 1 |
| SE | FNBP1      | - | chr9:129923843-129924026  | NA | 0.604 | 0               | 0.071  | 0.0002937363512 |   |
| SE | ULK3       | - | chr15:74838151-74838173   | NA | 0.603 | 0.02679711654   | -0.039 | 0.1239974608    |   |
| SE | TMEM161A   | - | chr19:19134783-19134916   | NA | 0.602 | 4.20E-05        | -0.014 |                 | 1 |
| SE | ARL4A      | + | chr7:12687634-12687728    | NA | 0.602 | 0               | 0.047  |                 | 1 |
| SE | ZCWPW2     | + | chr3:28492126-28492173    | NA | 0.602 | 4.72E-09        | -0.008 |                 | 1 |
| SE | TNC        | - | chr9:115048259-115048532  | NA | 0.601 | 0.0005415202019 | 0.124  | 0.006188894532  |   |
| SE | ANKRD12    | + | chr18:9204475-9204544     | NA | 0.597 | 0               | 0.183  |                 | 1 |
| SE | SYTL2      | - | chr11:85717482-85717530   | NA | 0.596 | 0.0001661427625 | 0.035  |                 | 1 |
| SE | RALGAPA1   | - | chr14:35548507-35548538   | NA | 0.594 | 8.12E-08        | 0.041  |                 | 1 |
| SE | RPRD2      | + | chr1:150441880-150441958  | NA | 0.591 | 0               | -0.09  | 0.0888300337    |   |
| SE | NME4       | + | chr16:406684-406777       | NA | 0.59  | 0.0002851559216 | 0.003  |                 | 1 |
| SE | FHL2       | - | chr2:105396646-105396697  | NA | 0.59  | 0.02228946003   | 0.016  |                 | 1 |
| SE | ZNF584     | + | chr19:58409964-58410091   | NA | 0.59  | 5.49E-08        | -0.002 |                 | 1 |
| SE | TEAD4      | + | chr12:2959947-2960353     | NA | 0.59  | 7.68E-06        | -0.125 |                 | 1 |
| SE | ZNF584     | + | chr19:58410005-58410091   | NA | 0.589 | 6.35E-08        | -0.01  |                 | 1 |
| SE | EMC3-AS1   | + | chr3:9987905-9988007      | NA | 0.589 | 0.003046176652  | 0.002  |                 | 1 |
| SE | SUZ12P1    | + | chr17:30734896-30734943   | NA | 0.583 | 1.11E-06        | 0.02   |                 | 1 |
| SE | NSFL1C     | - | chr20:1455713-1455719     | NA | 0.582 | 0               | 0.031  | 0.01245407629   |   |
| SE | MGRN1      | + | chr16:4686258-4686303     | NA | 0.582 | 1.44E-07        | 0.08   | 0.001210876276  |   |
| SE | NIN        | - | chr14:50756491-50758630   | NA | 0.581 | 0               | 0.004  |                 | 1 |
| SE | FGFR1OP2   | + | chr12:26960514-26960628   | NA | 0.58  | 0               | -0.019 |                 | 1 |
| SE | ZNF195     | - | chr11:3373576-3373656     | NA | 0.579 | 0.006463478574  | -0.055 |                 | 1 |
| SE | MLLT4      | + | chr6:167913402-167913423  | NA | 0.579 | 4.69E-10        | -0.104 |                 | 1 |
| SE | ZNF584     | + | chr19:58409940-58410091   | NA | 0.579 | 3.95E-08        | -0.006 |                 | 1 |
| SE | CTNND1     | + | chr11:57789036-57789155   | NA | 0.578 | 0               | 0.05   | 1.32E-06        |   |
| SE | FIRRE      | - | chrX:131795808-131796331  | NA | 0.578 | 0.03072258172   | -0.083 |                 | 1 |
| SE | PPIP5K2    | + | chr5:103135992-103136114  | NA | 0.577 | 0.001101883147  | -0.059 |                 | 1 |

|    |            |   |                           |    |       |                  |        |                 |
|----|------------|---|---------------------------|----|-------|------------------|--------|-----------------|
| SE | EPB41L2    | - | chr6:130870327-130870381  | NA | 0.576 | 5.39E-12         | 0.247  | 0               |
| SE | TOX2       | + | chr20:44065711-44066107   | NA | 0.576 | 0.02126672239    | -0.051 | 1               |
| SE | PER3       | + | chr1:7787197-7787246      | NA | 0.575 | 0.003807338828   | 0.149  | 1               |
| SE | C9orf3     | + | chr9:94928424-94928531    | NA | 0.575 | 0.0007666247027  | -0.073 | 1               |
| SE | MCTP1      | - | chr5:94917895-94917973    | NA | 0.575 | 1.56E-08         | 0.068  | 1               |
| SE | WARS       | - | chr14:100375282-100375350 | NA | 0.573 | 9.26E-05         | -0.014 | 1               |
| SE | TTC28      | - | chr22:27990788-27990812   | NA | 0.572 | 6.78E-07         | 0.082  | 1               |
| SE | ELF2       | - | chr4:139116648-139116807  | NA | 0.572 | 0.001701782054   | 0.14   | 0.4389218514    |
| SE | RPS24      | + | chr10:78040200-78040225   | NA | 0.57  | 5.37E-11         | 0.104  | 0               |
| SE | STAG3L3    | - | chr7:73000357-73000481    | NA | 0.569 | 0.0004383795297  | -0.004 | 1               |
| SE | NUP214     | + | chr9:131189052-131189131  | NA | 0.564 | 0.006949996165   | -0.019 | 1               |
| SE | CCDC88A    | - | chr2:55303068-55303152    | NA | 0.561 | 0                | 0.064  | 0.05755593527   |
| SE | CAST       | + | chr5:96726753-96726859    | NA | 0.557 | 0                | 0.032  | 1               |
| SE | AP1G1      | - | chr16:71767876-71767885   | NA | 0.557 | 0                | 0.148  | 0.0005668235355 |
| SE | WASH2P     | + | chr2:113595062-113595161  | NA | 0.555 | 0.000350375615   | -0.084 | 0.02421113543   |
| SE | LIMCH1     | + | chr4:41638931-41638967    | NA | 0.554 | 1.32E-12         | -0.006 | 1               |
| SE | PIN4       | + | chrX:72186233-72186534    | NA | 0.554 | 0                | -0.029 | 1               |
| SE | AMPD2      | + | chr1:109622184-109622353  | NA | 0.554 | 0.0002935232439  | 0.007  | 1               |
| SE | SNX14      | - | chr6:85538837-85538864    | NA | 0.554 | 0                | 0.052  | 0.0002910068944 |
| SE | ZCWPW1     | - | chr7:100407227-100407303  | NA | 0.552 | 3.10E-05         | -0.048 | 1               |
| SE | ZNF484     | - | chr9:92875014-92875059    | NA | 0.552 | 3.08E-05         | -0.017 | 1               |
| SE | C14orf166  | + | chr14:52004239-52004242   | NA | 0.55  | 0.00014487575793 | 0.005  | 0.005065734623  |
| SE | EPB41L2    | - | chr6:130870327-130870381  | NA | 0.548 | 4.47E-06         | 0.244  | 0               |
| SE | C19orf60   | + | chr19:18589412-18589683   | NA | 0.546 | 1.17E-08         | -0.016 | 0.03770047692   |
| SE | ITGB3BP    | - | chr1:63447564-63447614    | NA | 0.545 | 0                | 0.156  | 1.01E-12        |
| SE | KIAA1191   | - | chr5:176359480-176359567  | NA | 0.544 | 0.0001530389937  | 0      | 1               |
| SE | PPM1K      | - | chr4:88278535-88278642    | NA | 0.544 | 0.0009616700701  | 0.114  | 0.01644211319   |
| SE | CAST       | + | chr5:96726793-96726859    | NA | 0.543 | 0.0001035888519  | -0.001 | 1               |
| SE | SLC7A11    | - | chr4:138185120-138185244  | NA | 0.542 | 9.09E-08         | -0.011 | 1               |
| SE | ZCWPW1     | - | chr7:100402515-100402576  | NA | 0.541 | 0.0008828287501  | -0.087 | 7.43E-08        |
| SE | FNBP1      | - | chr9:129923843-129923996  | NA | 0.541 | 0                | 0.081  | 0.0009275162984 |
| SE | ASAP2      | + | chr2:9391061-9391196      | NA | 0.539 | 6.77E-06         | 0.072  | 1               |
| SE | CEP72      | + | chr5:665940-666099        | NA | 0.538 | 1.80E-07         | 0.045  | 1               |
| SE | RNF146     | + | chr6:127280515-127280604  | NA | 0.538 | 2.89E-08         | 0.118  | 8.93E-12        |
| SE | TSSC4      | + | chr11:2401838-2402147     | NA | 0.535 | 0                | 0.007  | 1               |
| SE | WASF3      | + | chr13:26680034-26680201   | NA | 0.534 | 6.92E-10         | 0.007  | 1               |
| SE | FNBP1      | - | chr9:129923843-129923939  | NA | 0.534 | 3.18E-05         | -0.021 | 1               |
| SE | MARK3      | + | chr14:103498501-103498528 | NA | 0.529 | 0.0004916542622  | -0.055 | 1               |
| SE | RAB3GAP1   | + | chr2:135169733-135169848  | NA | 0.527 | 5.95E-05         | 0      | 1               |
| SE | CCDC14     | - | chr3:123956354-123956427  | NA | 0.525 | 0.002598953941   | -0.005 | 1               |
| SE | PPIL3      | - | chr2:200882341-200882382  | NA | 0.525 | 1.32E-06         | -0.041 | 0.1038708471    |
| SE | PIGQ       | + | chr16:581198-581341       | NA | 0.524 | 0.0002419316532  | 0.001  | 1               |
| SE | RP11-58011 | - | chr17:47626546-47626627   | NA | 0.524 | 0.006170354981   | -0.014 | 1               |
| SE | MVD        | - | chr16:88657145-88657247   | NA | 0.523 | 0.0001426700148  | 0.013  | 1               |
| SE | FAM13B     | - | chr5:138018954-138019146  | NA | 0.522 | 3.97E-08         | -0.026 | 1               |
| SE | NFYA       | + | chr6:41080810-41080897    | NA | 0.521 | 5.31E-07         | 0.012  | 1               |
| SE | LRCH3      | + | chr3:197858833-197858905  | NA | 0.521 | 5.20E-11         | 0.132  | 1.39E-09        |
| SE | FAM188A    | - | chr10:15838227-15838279   | NA | 0.52  | 2.85E-13         | 0      | 1               |
| SE | SEPT9      | + | chr17:77402336-77402495   | NA | 0.519 | 4.46E-08         | 0      | 1               |
| SE | CLSTN1     | - | chr1:9756480-9756510      | NA | 0.516 | 0                | 0.04   | 0.1189545023    |
| SE | FAM24B     | - | chr10:122850423-122850520 | NA | 0.515 | 1.61E-09         | -0.013 | 1               |
| SE | SNRPN      | + | chr15:24974641-24974957   | NA | 0.514 | 5.03E-05         | 0.028  | 1               |
| SE | XPO6       | - | chr16:28155701-28155771   | NA | 0.514 | 1.03E-05         | 0.029  | 1               |
| SE | TTC28-AS1  | + | chr22:27989881-27990026   | NA | 0.514 | 0.001921405105   | 0.011  | 1               |
| SE | EEF1D      | - | chr8:143592646-143592797  | NA | 0.512 | 4.25E-06         | 0.046  | 1               |
| SE | EEF1D      | - | chr8:143590607-143590729  | NA | 0.51  | 1.39E-05         | -0.009 | 1               |
| SE | TNFSF12-TI | + | chr17:7559623-7559702     | NA | 0.503 | 3.25E-06         | -0.022 | 1               |
| SE | INADL      | + | chr1:62100318-62100408    | NA | 0.5   | 0.01919460471    | -0.013 | 1               |
| SE | MAGI1      | - | chr3:65387142-65387226    | NA | 0.5   | 4.47E-07         | 0.237  | 3.26E-11        |
| SE | MICAL3     | - | chr22:17826453-17826516   | NA | 0.5   | 1.06E-09         | -0.146 | 1               |
| SE | ARL4A      | + | chr7:12687634-12687728    | NA | 0.499 | 7.00E-10         | 0.109  | 0.2419974143    |
| SE | EEF1D      | - | chr8:143592646-143592942  | NA | 0.497 | 1.12E-11         | 0.038  | 1               |
| SE | ZNF277     | + | chr7:112286876-112287074  | NA | 0.497 | 0                | 0.002  | 1               |

|    |             |   |                           |    |       |                 |        |                 |
|----|-------------|---|---------------------------|----|-------|-----------------|--------|-----------------|
| SE | CTNND1      | + | chr11:57789036-57789155   | NA | 0.495 | 1.21E-11        | 0.021  | 1               |
| SE | MDM4        | + | chr1:204537429-204537497  | NA | 0.494 | 4.14E-05        | -0.063 | 1               |
| SE | KIF3A       | - | chr5:132706450-132706459  | NA | 0.49  | 2.45E-09        | 0.152  | 1               |
| SE | RIF1        | + | chr2:151480097-151480227  | NA | 0.489 | 0.002957482326  | -0.051 | 1               |
| SE | SUN1        | + | chr7:849519-849603        | NA | 0.489 | 1.12E-05        | -0.129 | 0.0748433781    |
| SE | AIFM1       | - | chrX:130155155-130155286  | NA | 0.488 | 0.003549029187  | 0.02   | 1               |
| SE | GOLGA4      | + | chr3:37266841-37266940    | NA | 0.487 | 0               | -0.063 | 1               |
| SE | TPK1        | - | chr7:144681806-144681864  | NA | 0.484 | 0.01202735009   | 0.081  | 1               |
| SE | TMEM25      | + | chr11:118533419-118533551 | NA | 0.48  | 0.002210906602  | -0.136 | 3.15E-14        |
| SE | PMS2CL      | + | chr7:6733398-6733527      | NA | 0.48  | 1.31E-10        | 0.153  | 0               |
| SE | EEF1D       | - | chr8:143590644-143590735  | NA | 0.479 | 0.001367554607  | 0.011  | 1               |
| SE | DPM1        | - | chr20:50941104-50941209   | NA | 0.474 | 0.0003324026152 | -0.027 | 1               |
| SE | EPB41L2     | - | chr6:130870327-130870381  | NA | 0.474 | 3.36E-07        | 0.076  | 1               |
| SE | DGKA        | + | chr12:55932560-55932909   | NA | 0.472 | 0.002122617065  | 0.206  | 1               |
| SE | NR4A1       | + | chr12:52052473-52052645   | NA | 0.472 | 0.01007221058   | 0.044  | 1               |
| SE | DGKH        | + | chr13:42221161-42221394   | NA | 0.471 | 2.68E-05        | 0.235  | 1               |
| SE | MRPS15      | - | chr1:36461263-36461312    | NA | 0.47  | 0.003230017772  | 0.013  | 1               |
| SE | LRRRC27     | + | chr10:132342212-132342271 | NA | 0.468 | 0.003432257142  | -0.017 | 1               |
| SE | CATSPER2    | - | chr15:43647049-43647118   | NA | 0.467 | 0.002544829601  | 0.044  | 1               |
| SE | CUL5        | + | chr11:108104189-108104902 | NA | 0.466 | 0               | -0.001 | 1               |
| SE | TIA1        | - | chr2:70228343-70228462    | NA | 0.465 | 4.53E-11        | 0.015  | 1               |
| SE | UGGT2       | - | chr13:95860787-95860883   | NA | 0.462 | 1.74E-10        | 0.001  | 1               |
| SE | DNAJB6      | + | chr7:157409794-157415529  | NA | 0.461 | 0.0002552904057 | -0.014 | 1               |
| SE | GPCPD1      | - | chr20:5586193-5586269     | NA | 0.46  | 0.003724555554  | -0.053 | 0.0005656385185 |
| SE | ANKRD10     | - | chr13:110894284-110894393 | NA | 0.459 | 0.01041046655   | 0.049  | 1               |
| SE | GUK1        | + | chr1:228141123-228141507  | NA | 0.459 | 8.84E-08        | 0.028  | 0.04222877495   |
| SE | C7orf55-LUC | + | chr7:139375508-139375583  | NA | 0.459 | 0.003536476151  | -0.022 | 1               |
| SE | MCTP1       | - | chr5:94917895-94917973    | NA | 0.457 | 5.72E-11        | -0.056 | 1               |
| SE | CIRBP       | + | chr19:1273600-1273715     | NA | 0.456 | 1.72E-06        | 0.02   | 1               |
| SE | USP45       | - | chr6:99445796-99446463    | NA | 0.455 | 7.84E-09        | -0.082 | 1               |
| SE | PPIL3       | - | chr2:200882341-200882435  | NA | 0.454 | 5.63E-11        | -0.03  | 0.002990973779  |
| SE | PFDN5       | + | chr12:53296429-53296551   | NA | 0.453 | 0.0007066383201 | -0.069 | 0.09450408021   |
| SE | FAM221A     | + | chr7:23692182-23694913    | NA | 0.453 | 0               | 0.037  | 1               |
| SE | APLP1       | + | chr19:35878081-35878108   | NA | 0.448 | 3.77E-07        | 0.027  | 6.52E-13        |
| SE | FNIP2       | + | chr4:158833800-158833890  | NA | 0.447 | 0.0001145993843 | -0.039 | 1               |
| SE | SEPT2       | + | chr2:241316421-241316540  | NA | 0.447 | 0.001538786731  | 0.028  | 1               |
| SE | DNAJC4      | + | chr11:64231031-64231147   | NA | 0.445 | 0.03833779699   | 0.01   | 1               |
| SE | CLASP1      | - | chr2:121409023-121409047  | NA | 0.444 | 9.89E-07        | 0.166  | 5.97E-05        |
| SE | CACTIN      | - | chr19:3611228-3611364     | NA | 0.444 | 2.72E-05        | 0.006  | 1               |
| SE | TEX22       | + | chr14:105449358-105449409 | NA | 0.444 | 5.32E-13        | -0.065 | 8.91E-05        |
| SE | NADSYN1     | + | chr11:71476032-71477438   | NA | 0.443 | 2.65E-05        | 0.064  | 4.34E-07        |
| SE | FAM135A     | + | chr6:70486166-70486244    | NA | 0.442 | 1.50E-07        | -0.03  | 1               |
| SE | MAP4K4      | + | chr2:101868028-101868037  | NA | 0.441 | 0               | 0.268  | 0               |
| SE | VPS13B      | + | chr8:99507769-99507911    | NA | 0.44  | 0.00206399437   | -0.009 | 1               |
| SE | ERBB2IP     | + | chr5:66072168-66072291    | NA | 0.439 | 0.005843897436  | 0.137  | 0.02706632387   |
| SE | FBRS        | + | chr16:30661303-30661333   | NA | 0.439 | 8.18E-06        | -0.027 | 0.4139295319    |
| SE | WDR27       | - | chr6:169665485-169665556  | NA | 0.439 | 6.79E-07        | -0.009 | 1               |
| SE | XRRA1       | - | chr11:74945017-74945085   | NA | 0.438 | 0.0001331087106 | 0.079  | 1               |
| SE | LRRRC75B    | - | chr22:24588678-24589265   | NA | 0.438 | 0.0004754203316 | -0.078 | 0.2099330039    |
| SE | LETM2       | + | chr8:38406945-38407038    | NA | 0.437 | 1.41E-06        | 0.028  | 1               |
| SE | MED23       | - | chr6:131615323-131615341  | NA | 0.436 | 3.90E-07        | 0.144  | 1               |
| SE | ABHD14B     | - | chr3:51971811-51971892    | NA | 0.435 | 4.64E-06        | 0.033  | 0.5163550836    |
| SE | PUF60       | - | chr8:143820665-143820716  | NA | 0.435 | 2.28E-10        | 0.041  | 0.0002170931953 |
| SE | RALGAPA1    | - | chr14:35700161-35700302   | NA | 0.434 | 0.003894370242  | 0.301  | 1               |
| SE | CTNND1      | + | chr11:57791491-57791673   | NA | 0.434 | 2.44E-08        | 0.043  | 1               |
| SE | CTNND1      | + | chr11:57791493-57791673   | NA | 0.434 | 2.12E-08        | 0.043  | 1               |
| SE | TTC7A       | + | chr2:46958494-46958552    | NA | 0.432 | 0.004065365915  | 0.005  | 1               |
| SE | WARS        | - | chr14:100375282-100375406 | NA | 0.432 | 0.001631060496  | -0.014 | 1               |
| SE | PSMA3-AS1   | - | chr14:58288717-58288813   | NA | 0.432 | 7.31E-06        | -0.008 | 1               |
| SE | NOD1        | - | chr7:30463608-30463698    | NA | 0.431 | 0.0004537657274 | 0.097  | 1               |
| SE | HPS1        | - | chr10:98431130-98431291   | NA | 0.43  | 1.28E-05        | -0.008 | 1               |
| SE | TSSC4       | + | chr11:2401975-2402147     | NA | 0.429 | 1.03E-08        | 0.003  | 1               |
| SE | C4orf36     | - | chr4:86932221-86932319    | NA | 0.427 | 0.002784788117  | -0.044 | 1               |

|    |             |   |                           |    |       |                 |        |                 |
|----|-------------|---|---------------------------|----|-------|-----------------|--------|-----------------|
| SE | GOLGB1      | - | chr3:121719645-121719753  | NA | 0.427 | 0.04360660297   | 0.092  | 1               |
| SE | CEP57L1     | + | chr6:109106034-109106090  | NA | 0.427 | 0.0007319614165 | 0.009  | 1               |
| SE | ZFAND5      | - | chr9:72363469-72363606    | NA | 0.426 | 0               | 0.023  | 0.5651198145    |
| SE | DBR1        | - | chr3:138163777-138163858  | NA | 0.426 | 0               | -0.017 | 1               |
| SE | IMMP1L      | - | chr11:31460625-31460714   | NA | 0.426 | 0.00831961416   | -0.017 | 1               |
| SE | OFD1        | + | chrX:13763744-13763855    | NA | 0.423 | 0               | -0.022 | 0.6703107187    |
| SE | GOLGB1      | - | chr3:121719645-121719768  | NA | 0.423 | 0.01706419273   | 0.084  | 1               |
| SE | AC024560.3  | - | chr3:197624471-197624720  | NA | 0.423 | 4.05E-12        | 0.029  | 1               |
| SE | NAGK        | + | chr2:71070740-71070839    | NA | 0.422 | 0.003548756426  | -0.047 | 1               |
| SE | ORMDL1      | - | chr2:189783013-189783123  | NA | 0.422 | 0               | -0.041 | 0.9341657548    |
| SE | MON2        | + | chr12:62566013-62566031   | NA | 0.421 | 0.0009638969816 | 0.045  | 1               |
| SE | RALGAPA2    | - | chr20:20396694-20396734   | NA | 0.421 | 0.0255521065    | -0.094 | 3.15E-14        |
| SE | SEMA4F      | + | chr2:74662731-74662825    | NA | 0.419 | 0.0004418183214 | 0.036  | 1               |
| SE | RAB34       | - | chr17:28717212-28717291   | NA | 0.418 | 4.03E-06        | 0.012  | 1               |
| SE | C1orf86     | - | chr1:2192844-2192975      | NA | 0.417 | 6.06E-08        | -0.005 | 1               |
| SE | ELFN2       | - | chr22:37417768-37417919   | NA | 0.417 | 0.001125297341  | -0.007 | 1               |
| SE | HMG1        | - | chr21:39345829-39345958   | NA | 0.417 | 0               | 0.033  | 1               |
| SE | PKIG        | + | chr20:44582584-44582731   | NA | 0.416 | 0               | -0.101 | 3.41E-05        |
| SE | MBD1        | - | chr18:50271468-50271540   | NA | 0.415 | 0.0009073322787 | -0.06  | 0.04015298357   |
| SE | FBXO24      | + | chr7:100595101-100595223  | NA | 0.414 | 6.11E-06        | 0.03   | 1               |
| SE | SERPINB6    | - | chr6:2968778-2968913      | NA | 0.414 | 0.0003879148638 | 0.021  | 1               |
| SE | MLLT6       | + | chr17:38721877-38722227   | NA | 0.413 | 3.20E-06        | -0.089 | 1               |
| SE | GPR157      | - | chr1:9105485-9105680      | NA | 0.412 | 0.00512657653   | 0.078  | 1               |
| SE | HMG1        | - | chr21:39345829-39345958   | NA | 0.412 | 7.73E-13        | 0.047  | 0               |
| SE | SLC35B1     | - | chr17:49707342-49707444   | NA | 0.41  | 0.0006971692881 | 0.01   | 1               |
| SE | PILRB       | + | chr7:100353894-100354012  | NA | 0.41  | 9.00E-11        | 0.032  | 0.2268086619    |
| SE | MPRIP       | + | chr17:17180606-17180669   | NA | 0.41  | 0.00173447688   | -0.075 | 0.02200380162   |
| SE | NFASC       | + | chr1:204962107-204962158  | NA | 0.41  | 2.42E-06        | 0.178  | 8.88E-09        |
| SE | KIAA1109    | + | chr4:122275971-122276022  | NA | 0.408 | 1.95E-08        | 0.153  | 1               |
| SE | C17orf62    | - | chr17:82447579-82447621   | NA | 0.405 | 4.76E-07        | -0.007 | 1               |
| SE | CDK5RAP2    | - | chr9:120460571-120460747  | NA | 0.404 | 7.74E-05        | -0.019 | 1               |
| SE | THAP6       | + | chr4:75542408-75542486    | NA | 0.404 | 0.001289105061  | -0.1   | 1               |
| SE | MDM4        | + | chr1:204537458-204537497  | NA | 0.403 | 4.41E-05        | -0.058 | 1               |
| SE | HNRNPA2B    | - | chr7:26190992-26191128    | NA | 0.402 | 0               | -0.001 | 1               |
| SE | TEX30       | - | chr13:102770011-102770086 | NA | 0.4   | 4.43E-06        | -0.002 | 0.6358331318    |
| SE | UBA2        | + | chr19:34430092-34430186   | NA | 0.399 | 5.38E-06        | -0.018 | 1               |
| SE | PPP1R3E     | - | chr14:23300106-23300325   | NA | 0.399 | 0.0001503356103 | 0.009  | 1               |
| SE | ZFYVE27     | + | chr10:97743093-97743164   | NA | 0.398 | 5.08E-07        | -0.01  | 1               |
| SE | IFT122      | + | chr3:129461227-129461304  | NA | 0.398 | 0.005789128017  | -0.073 | 1               |
| SE | PLEKHA8     | + | chr7:30050433-30050474    | NA | 0.397 | 4.16E-05        | -0.004 | 1               |
| SE | ZNF142      | - | chr2:218651700-218651822  | NA | 0.397 | 0.01252426593   | 0.089  | 1               |
| SE | ATXN2       | - | chr12:111464661-111464715 | NA | 0.397 | 5.72E-05        | 0.005  | 1               |
| SE | ELOVL5      | - | chr6:53290400-53290535    | NA | 0.395 | 0.003902246943  | -0.129 | 1               |
| SE | GLS         | + | chr2:190920214-190920248  | NA | 0.395 | 0.0002389327734 | -0.044 | 1               |
| SE | GUK1        | + | chr1:228141123-228141288  | NA | 0.395 | 1.21E-08        | 0.032  | 1               |
| SE | BCL2L2      | + | chr14:23308815-23308932   | NA | 0.394 | 1.28E-06        | -0.002 | 1               |
| SE | SYTL4       | - | chrX:100703092-100703185  | NA | 0.392 | 2.13E-05        | 0.038  | 1               |
| SE | ZNF383      | + | chr19:37219598-37219749   | NA | 0.392 | 0.007705740173  | -0.042 | 1               |
| SE | DUSP12      | + | chr1:161751131-161751377  | NA | 0.39  | 0.001440110946  | -0.062 | 1               |
| SE | MYO9A       | - | chr15:71892964-71893177   | NA | 0.389 | 0.001802867873  | -0.135 | 1               |
| SE | SNX25       | + | chr4:185351444-185351609  | NA | 0.389 | 5.65E-12        | -0.003 | 1               |
| SE | OXR1        | + | chr8:106737519-106737600  | NA | 0.389 | 1.25E-11        | 0.169  | 3.60E-09        |
| SE | TIAM1       | - | chr21:31276731-31276908   | NA | 0.388 | 0.02905195337   | 0.014  | 1               |
| SE | EPB41L2     | - | chr6:130876673-130876775  | NA | 0.387 | 1.18E-05        | 0.1    | 0.2015795536    |
| SE | C1orf86     | - | chr1:2192646-2192975      | NA | 0.387 | 9.33E-08        | 0.008  | 0.001859775651  |
| SE | EXOC7       | - | chr17:76091142-76091235   | NA | 0.387 | 0               | 0.128  | 0.0001621404627 |
| SE | SNHG17      | - | chr20:38422091-38422241   | NA | 0.386 | 7.64E-10        | -0.025 | 1               |
| SE | CDKL3       | - | chr5:134359896-134360091  | NA | 0.385 | 0.04552554741   | -0.095 | 1               |
| SE | C21orf62-A5 | + | chr21:32788611-32788701   | NA | 0.385 | 0.01673793337   | -0.091 | 1               |
| SE | CTAGE5      | + | chr14:39320927-39321056   | NA | 0.384 | 9.02E-05        | 0.038  | 0.2046867693    |
| SE | ST3GAL6-A   | - | chr3:98718423-98718521    | NA | 0.384 | 0.01134847022   | 0.016  | 1               |
| SE | USP36       | - | chr17:78797785-78797879   | NA | 0.382 | 2.27E-05        | 0.033  | 1               |
| SE | STIM1       | + | chr11:4084672-4084765     | NA | 0.381 | 6.19E-06        | -0.006 | 1               |

|    |          |   |                           |    |       |                 |        |               |   |
|----|----------|---|---------------------------|----|-------|-----------------|--------|---------------|---|
| SE | ZCWPW2   | + | chr3:28478813-28478931    | NA | 0.377 | 4.60E-06        | 0.007  |               | 1 |
| SE | SVIL     | - | chr10:29532001-29532172   | NA | 0.376 | 2.63E-06        | -0.058 |               | 1 |
| SE | HMG1     | - | chr21:39347246-39347292   | NA | 0.375 | 7.19E-11        | 0.041  |               | 1 |
| SE | ZNF519   | - | chr18:14080188-14080266   | NA | 0.373 | 2.79E-06        | -0.051 |               | 1 |
| SE | CIRBP    | + | chr19:1273493-1273715     | NA | 0.369 | 9.30E-07        | 0.015  |               | 1 |
| SE | ARMC4    | - | chr10:27968922-27969018   | NA | 0.369 | 0.01357652802   | 0.072  |               | 1 |
| SE | PCBP4    | - | chr3:51961748-51961894    | NA | 0.367 | 0.01272273568   | 0.008  | 0.05908775887 |   |
| SE | ARHGAP21 | - | chr10:24622732-24622762   | NA | 0.367 | 1.48E-07        | 0.028  |               | 1 |
| SE | DCAF8    | - | chr1:160261284-160261350  | NA | 0.367 | 3.58E-07        | 0.043  | 0.3245857962  |   |
| SE | SH3GLB2  | - | chr9:129010669-129010693  | NA | 0.367 | 0.0009146336722 | -0.014 |               | 1 |
| SE | NUDT22   | + | chr11:64227567-64227666   | NA | 0.367 | 3.01E-09        | -0.046 | 6.37E-07      |   |
| SE | GAA      | + | chr17:80101810-80101890   | NA | 0.367 | 8.37E-06        | -0.036 |               | 1 |
| SE | LAS1L    | - | chrX:65524563-65524614    | NA | 0.365 | 2.58E-06        | 0.054  | 0.2567188962  |   |
| SE | MCTP1    | - | chr5:94799012-94799132    | NA | 0.365 | 1.48E-08        | 0.06   |               | 1 |
| SE | DPY19L2  | - | chr12:63590998-63591127   | NA | 0.364 | 0.001505065008  | -0.02  |               | 1 |
| SE | STRADA   | - | chr17:63726637-63726695   | NA | 0.364 | 9.33E-06        | 0.015  |               | 1 |
| SE | RIN3     | + | chr14:92615406-92615479   | NA | 0.363 | 9.41E-05        | -0.022 |               | 1 |
| SE | SP140L   | + | chr2:230328756-230328831  | NA | 0.363 | 0.0001674844062 | 0.006  |               | 1 |
| SE | KLHDC1   | + | chr14:49728925-49729009   | NA | 0.363 | 0.04492330258   | 0.006  |               | 1 |
| SE | PDPR     | + | chr16:70114820-70114930   | NA | 0.362 | 0.01384958618   | -0.086 |               | 1 |
| SE | MYO5A    | - | chr15:52337809-52337884   | NA | 0.362 | 0               | -0.191 |               | 1 |
| SE | PICALM   | - | chr11:85978069-85978093   | NA | 0.361 | 0               | -0.134 | 1.09E-12      |   |
| SE | BORA     | + | chr13:72734959-72735005   | NA | 0.361 | 0.0002217088096 | -0.043 |               | 1 |
| SE | FAM24B   | - | chr10:122850423-122850550 | NA | 0.361 | 1.17E-08        | -0.007 |               | 1 |
| SE | NHLRC3   | + | chr13:39042104-39042305   | NA | 0.36  | 5.79E-08        | 0.05   | 0.8245268707  |   |
| SE | EED      | + | chr11:86264171-86264263   | NA | 0.359 | 0.02081308966   | -0.052 |               | 1 |
| SE | ASAH2B   | + | chr10:50745127-50745274   | NA | 0.359 | 0.000381490862  | -0.038 |               | 1 |
| SE | FAM195A  | + | chr16:646471-646608       | NA | 0.358 | 0.003349315801  | 0.022  |               | 1 |
| SE | ZFX      | + | chrX:24161714-24161842    | NA | 0.357 | 0.03417336386   | 0.161  |               | 1 |
| SE | TEX15    | - | chr8:30874936-30875102    | NA | 0.357 | 2.61E-05        | -0.077 |               | 1 |
| SE | TTLL3    | + | chr3:9818821-9818920      | NA | 0.357 | 0.0009150251426 | -0.02  |               | 1 |
| SE | KIF23    | + | chr15:69425281-69425323   | NA | 0.356 | 4.47E-13        | -0.081 | 0.01190529972 |   |
| SE | NBEAL1   | + | chr2:203115984-203116070  | NA | 0.355 | 0.0002383144115 | -0.046 |               | 1 |
| SE | KLHL24   | + | chr3:183636220-183636311  | NA | 0.354 | 7.54E-08        | 0.031  |               | 1 |
| SE | SAMD4B   | + | chr19:39351816-39352374   | NA | 0.354 | 0.01422507111   | 0.042  |               | 1 |
| SE | ZNF786   | - | chr7:149080590-149080717  | NA | 0.354 | 0.04214164797   | -0.03  |               | 1 |
| SE | C16orf13 | - | chr16:635517-635774       | NA | 0.353 | 0.0004141608316 | -0.024 |               | 1 |
| SE | BROX     | + | chr1:222715144-222715269  | NA | 0.353 | 0.00330261625   | 0.055  |               | 1 |
| SE | SREBF2   | + | chr22:41904534-41904732   | NA | 0.353 | 0.02530794582   | 0.002  | 4.37E-07      |   |
| SE | ARHGEF11 | - | chr1:156938417-156938513  | NA | 0.352 | 5.07E-07        | 0.013  |               | 1 |
| SE | ITPR1    | + | chr3:4653841-4653886      | NA | 0.351 | 0.008916593862  | -0.112 |               | 1 |
| SE | TOP1MT   | - | chr8:143334107-143334285  | NA | 0.35  | 1.38E-06        | 0.021  |               | 1 |
| SE | TIA1     | - | chr2:70229058-70229091    | NA | 0.349 | 1.08E-13        | -0.024 |               | 1 |
| SE | TANC2    | + | chr17:63412679-63412709   | NA | 0.348 | 1.26E-07        | 0.311  |               | 1 |
| SE | C17orf62 | - | chr17:82446622-82446692   | NA | 0.348 | 5.97E-10        | -0.007 |               | 1 |
| SE | MOK      | - | chr14:102265822-102265912 | NA | 0.346 | 0.0005890502783 | -0.022 |               | 1 |
| SE | IFT122   | + | chr3:129458598-129458677  | NA | 0.346 | 0.03306288922   | -0.086 | 0.341561334   |   |
| SE | KIF1B    | + | chr1:10326110-10326359    | NA | 0.345 | 0.001701782054  | 0.184  | 3.19E-09      |   |
| SE | POLE2    | - | chr14:49674349-49674427   | NA | 0.345 | 4.09E-07        | -0.001 | 0.537773333   |   |
| SE | FAM161A  | - | chr2:61836582-61836872    | NA | 0.345 | 5.12E-05        | 0.056  |               | 1 |
| SE | SYNE1    | - | chr6:152145486-152145555  | NA | 0.343 | 0.02105099548   | -0.205 | 8.16E-11      |   |
| SE | TMEM218  | - | chr11:125102131-125102302 | NA | 0.343 | 0.03972173331   | 0.001  |               | 1 |
| SE | MCM9     | - | chr6:118856370-118856545  | NA | 0.342 | 0.002662136025  | 0.033  |               | 1 |
| SE | MRPS18C  | + | chr4:83458345-83458429    | NA | 0.342 | 3.58E-13        | -0.007 |               | 1 |
| SE | TNRC18   | - | chr7:5329936-5329969      | NA | 0.341 | 0.03499961163   | -0.086 | 0.07802427692 |   |
| SE | GOLGA6L9 | + | chr15:82432571-82432631   | NA | 0.341 | 0.009416548364  | -0.139 |               | 1 |
| SE | NPHP3    | - | chr3:132696730-132696813  | NA | 0.34  | 1.09E-05        | 0.034  |               | 1 |
| SE | TPCN2    | + | chr11:69067502-69067605   | NA | 0.34  | 6.03E-05        | -0.052 |               | 1 |
| SE | FAM13B   | - | chr5:137946227-137946311  | NA | 0.339 | 3.76E-05        | -0.061 | 0.00986286595 |   |
| SE | SCML1    | + | chrX:17744070-17744219    | NA | 0.339 | 0.001379584947  | -0.062 |               | 1 |
| SE | MFSD12   | - | chr19:3542775-3542977     | NA | 0.339 | 4.34E-05        | 0.04   |               | 1 |
| SE | PPIL3    | - | chr2:200885261-200885367  | NA | 0.339 | 1.93E-05        | -0.034 |               | 1 |
| SE | HMMR     | + | chr5:163467700-163467748  | NA | 0.338 | 1.27E-11        | -0.051 |               | 1 |



|    |            |   |                           |    |       |                 |        |                 |
|----|------------|---|---------------------------|----|-------|-----------------|--------|-----------------|
| SE | NF1        | + | chr17:31252937-31253000   | NA | 0.338 | 2.85E-05        | -0.015 | 1               |
| SE | CD27-AS1   | - | chr12:6450892-6450980     | NA | 0.337 | 0.02475961249   | 0.024  | 1               |
| SE | SUV420H2   | + | chr19:55343977-55343997   | NA | 0.336 | 0.001968293186  | -0.035 | 1               |
| SE | YIPF1      | - | chr1:53855000-53855051    | NA | 0.335 | 0.0006432768657 | 0.023  | 1               |
| SE | N4BP2      | + | chr4:40100035-40100126    | NA | 0.335 | 0.03898426062   | 0.172  | 1               |
| SE | March2     | + | chr19:8418741-8418807     | NA | 0.335 | 6.70E-05        | -0.03  | 1               |
| SE | RAD51AP1   | + | chr12:4545781-4545832     | NA | 0.335 | 4.54E-05        | -0.086 | 1               |
| SE | TOM1L2     | - | chr17:17857768-17857855   | NA | 0.335 | 6.07E-07        | 0.04   | 1               |
| SE | ZDHHC15    | - | chrX:75429077-75429198    | NA | 0.334 | 0.01080928689   | -0.012 | 1               |
| SE | PCOLCE     | + | chr7:100605504-100605812  | NA | 0.334 | 0.000261928969  | -0.017 | 0.4364746126    |
| SE | PCBP1-AS1  | - | chr2:70059642-70059680    | NA | 0.334 | 0.003387004345  | 0.025  | 1               |
| SE | MRPS28     | - | chr8:80028694-80028796    | NA | 0.333 | 0.00106274245   | 0.081  | 1               |
| SE | RCN1       | + | chr11:32103003-32103202   | NA | 0.332 | 0.04655359236   | 0.005  | 1               |
| SE | ANO6       | + | chr12:45228167-45228273   | NA | 0.332 | 0.04369154184   | -0.007 | 1               |
| SE | AGRN       | + | chr1:1051031-1051043      | NA | 0.332 | 1.00E-04        | 0.256  | 0               |
| SE | FHOD3      | + | chr18:36687127-36687178   | NA | 0.331 | 0.0391410956    | 0.056  | 1               |
| SE | ENTHD2     | - | chr17:81232314-81232518   | NA | 0.331 | 0.0001166155859 | -0.065 | 0.02667018268   |
| SE | PCOLCE     | + | chr7:100605675-100605812  | NA | 0.33  | 5.14E-05        | -0.01  | 1               |
| SE | AURKB      | - | chr17:8210176-8210225     | NA | 0.33  | 1.60E-09        | 0.156  | 7.96E-09        |
| SE | RP11-295P  | + | chr10:13654088-13654258   | NA | 0.33  | 0.003522034591  | 0.012  | 1               |
| SE | PRPF40B    | + | chr12:49632595-49632623   | NA | 0.329 | 0.001138009614  | -0.077 | 0.07353316925   |
| SE | ERMARD     | + | chr6:169753037-169753181  | NA | 0.329 | 0.0001454345137 | 0.035  | 1               |
| SE | DCAF8      | - | chr1:160261284-160261325  | NA | 0.329 | 9.41E-05        | 0.019  | 1               |
| SE | WIBG       | - | chr12:55927075-55927267   | NA | 0.329 | 0.003959039809  | 0.088  | 1               |
| SE | ACTR3B     | + | chr7:152811696-152811733  | NA | 0.328 | 1.08E-13        | -0.062 | 0.06486921955   |
| SE | ZMYM1      | + | chr1:35093319-35093441    | NA | 0.328 | 0.004503457102  | 0.114  | 1               |
| SE | CCHCR1     | - | chr6:31157384-31157500    | NA | 0.328 | 1.20E-06        | 0.035  | 1               |
| SE | MTIF3      | - | chr13:27441016-27441077   | NA | 0.327 | 0.0001959215647 | 0.084  | 1               |
| SE | AHI1       | - | chr6:135302711-135302817  | NA | 0.327 | 0.01187945836   | 0.069  | 0.2343642136    |
| SE | C1orf162   | + | chr1:111477650-111477775  | NA | 0.327 | 0.007797388202  | -0.035 | 1               |
| SE | SREK1      | + | chr5:66156064-66158932    | NA | 0.327 | 1.42E-06        | 0.009  | 1               |
| SE | SLC25A36   | + | chr3:140966933-140967036  | NA | 0.326 | 1.18E-10        | -0.019 | 1               |
| SE | ELMOD3     | + | chr2:85371439-85371562    | NA | 0.326 | 0.02558045263   | -0.018 | 1               |
| SE | SEPT7      | + | chr7:35831491-35832034    | NA | 0.326 | 0               | 0.096  | 0.003911619295  |
| SE | MSH5-SAPC  | + | chr6:31762789-31763168    | NA | 0.326 | 3.62E-07        | -0.06  | 0.06333810809   |
| SE | GORAB      | + | chr1:170536309-170536421  | NA | 0.325 | 0.02241166849   | 0.006  | 1               |
| SE | PCMTD1     | - | chr8:51839446-51839638    | NA | 0.325 | 1.42E-06        | 0.04   | 3.17E-07        |
| SE | RFX2       | - | chr19:6026162-6026237     | NA | 0.324 | 0.0003095361672 | -0.076 | 1               |
| SE | ARHGEF10   | + | chr8:1880047-1880164      | NA | 0.324 | 0.000880675005  | 0.082  | 1               |
| SE | ILF3       | + | chr19:10684415-10684476   | NA | 0.323 | 1.34E-11        | 0.002  | 1               |
| SE | INCENP     | + | chr11:62141499-62141511   | NA | 0.323 | 0.02376597087   | -0.121 | 0.0004036382164 |
| SE | NLRX1      | + | chr11:119172355-119172425 | NA | 0.323 | 8.79E-05        | -0.011 | 1               |
| SE | NDEL1      | + | chr17:8463319-8463354     | NA | 0.323 | 0.001234956404  | -0.03  | 0.4336648067    |
| SE | HMGN1      | - | chr21:39345829-39347292   | NA | 0.323 | 0               | 0.039  | 1               |
| SE | MPHOSPH9   | - | chr12:123226287-123226351 | NA | 0.322 | 8.53E-11        | 0.094  | 1               |
| SE | KLHL24     | + | chr3:183636220-183636311  | NA | 0.322 | 0.0001503356103 | 0.018  | 1               |
| SE | PPIP5K2    | + | chr5:103186319-103186439  | NA | 0.322 | 0.0002061758732 | 0.035  | 1               |
| SE | ZNF772     | - | chr19:57475659-57475786   | NA | 0.322 | 0.008723427672  | 0.14   | 1               |
| SE | SPATA4     | - | chr4:176192957-176193076  | NA | 0.321 | 0.00010612589   | 0.027  | 1               |
| SE | TMEM39A    | - | chr3:119435754-119435935  | NA | 0.321 | 2.44E-10        | 0.155  | 1               |
| SE | PEX7       | + | chr6:136869889-136870003  | NA | 0.32  | 0.002238644159  | -0.017 | 1               |
| SE | ZNF711     | + | chrX:85246929-85247183    | NA | 0.32  | 7.32E-08        | 0.024  | 1               |
| SE | SPEF2      | + | chr5:35644354-35644525    | NA | 0.32  | 9.18E-05        | -0.102 | 1               |
| SE | BAZ1A      | - | chr14:34786125-34786221   | NA | 0.32  | 0.001379584947  | -0.027 | 1               |
| SE | SLC2A11    | + | chr22:23877384-23877869   | NA | 0.319 | 9.42E-06        | -0.002 | 0.6223901432    |
| SE | TSSC4      | + | chr11:2401838-2401979     | NA | 0.319 | 5.66E-06        | -0.001 | 1               |
| SE | TRIM16     | - | chr17:15651090-15651946   | NA | 0.319 | 0.0007828582725 | -0.066 | 0.005247877485  |
| SE | TOP1MT     | - | chr8:143332486-143332657  | NA | 0.317 | 1.32E-09        | 0.052  | 0.08678612438   |
| SE | TRAF3IP2-A | + | chr6:111574620-111574658  | NA | 0.317 | 0.01210955425   | -0.03  | 1               |
| SE | AAK1       | - | chr2:69495984-69496080    | NA | 0.316 | 0.006955259997  | 0.164  | 1               |
| SE | USP8       | + | chr15:50484274-50484361   | NA | 0.316 | 7.79E-08        | -0.012 | 1               |
| SE | CCP110     | + | chr16:19524779-19525019   | NA | 0.315 | 0.002784788117  | -0.075 | 1               |
| SE | GOLT1B     | + | chr12:21507943-21508109   | NA | 0.315 | 5.26E-07        | 0.16   | 1               |

|    |            |   |                           |    |       |                 |        |                 |
|----|------------|---|---------------------------|----|-------|-----------------|--------|-----------------|
| SE | SUMF2      | + | chr7:56074113-56074218    | NA | 0.315 | 0               | -0.024 | 0.03608106686   |
| SE | TCEA1      | - | chr8:54002891-54002940    | NA | 0.315 | 0.01533786035   | 0.01   | 0.05019875989   |
| SE | MYO6       | + | chr6:75911671-75911698    | NA | 0.315 | 3.49E-11        | 0.034  | 1               |
| SE | SENP7      | - | chr3:101417592-101417790  | NA | 0.314 | 1.18E-10        | 0.012  | 1               |
| SE | PPIP5K2    | + | chr5:103187313-103187376  | NA | 0.314 | 2.71E-06        | 0.043  | 0.2318864067    |
| SE | BPTF       | + | chr17:67875555-67875744   | NA | 0.314 | 9.73E-12        | 0.016  | 1               |
| SE | RBM6       | + | chr3:49975322-49975392    | NA | 0.313 | 2.49E-06        | -0.019 | 1               |
| SE | C14orf79   | + | chr14:104989631-104989707 | NA | 0.313 | 0.03336016912   | -0.064 | 1               |
| SE | NUDT13     | + | chr10:73124213-73124320   | NA | 0.313 | 0.0005127634016 | -0.006 | 1               |
| SE | GATAD2A    | + | chr19:19436130-19436219   | NA | 0.313 | 0.00140484798   | -0.062 | 1               |
| SE | RGS19      | - | chr20:64076856-64076954   | NA | 0.313 | 0.003517135917  | -0.015 | 1               |
| SE | MEIG1      | + | chr10:14970247-14970546   | NA | 0.313 | 0.03122985027   | 0.076  | 1               |
| SE | CD27-AS1   | - | chr12:6450869-6450980     | NA | 0.313 | 0.01675843214   | 0.003  | 1               |
| SE | SLC29A1    | + | chr6:44226060-44226167    | NA | 0.312 | 1.18E-05        | -0.047 | 1               |
| SE | PDPR       | + | chr16:70114869-70114930   | NA | 0.311 | 0.0008000210449 | -0.086 | 1               |
| SE | EEF1D      | - | chr8:143590644-143590738  | NA | 0.311 | 0.0007911413037 | -0.013 | 1               |
| SE | SLC9B1     | - | chr4:102949256-102949427  | NA | 0.311 | 0.006378477914  | 0.17   | 1               |
| SE | ARNTL2     | + | chr12:27370128-27370230   | NA | 0.309 | 0.02166060778   | 0.007  | 1               |
| SE | KIAA1468   | + | chr18:62279773-62279856   | NA | 0.309 | 0.03090604922   | 0.109  | 2.86E-13        |
| SE | DST        | - | chr6:56463045-56463156    | NA | 0.309 | 0               | -0.009 | 0.0004247547399 |
| SE | ZDHHC16    | + | chr10:97448189-97448350   | NA | 0.309 | 0.006465468267  | 0.003  | 1               |
| SE | C17orf62   | - | chr17:82449173-82449292   | NA | 0.309 | 1.37E-07        | -0.014 | 1               |
| SE | PRPF40A    | - | chr2:152679055-152679109  | NA | 0.309 | 0               | 0.017  | 1               |
| SE | DHX34      | + | chr19:47376914-47376989   | NA | 0.308 | 0.008437561811  | -0.001 | 1               |
| SE | TCEA1      | - | chr8:54002891-54003092    | NA | 0.308 | 0.0009906262505 | 0.006  | 0.002119978404  |
| SE | JKAMP      | + | chr14:59486680-59486804   | NA | 0.307 | 2.33E-12        | 0.003  | 1               |
| SE | UBXN2B     | + | chr8:58413298-58413371    | NA | 0.307 | 0.0001467205675 | 0.006  | 1               |
| SE | BORA       | + | chr13:72731280-72731387   | NA | 0.306 | 2.29E-05        | -0.032 | 2.61E-06        |
| SE | TMEM218    | - | chr11:125102131-125102317 | NA | 0.306 | 0.009312346136  | -0.001 | 1               |
| SE | JKAMP      | + | chr14:59486730-59486804   | NA | 0.305 | 1.06E-12        | 0.002  | 1               |
| SE | ZNF133     | + | chr20:18289898-18290074   | NA | 0.305 | 0.01781677028   | -0.051 | 1               |
| SE | RP11-452F1 | + | chr1:222823855-222823945  | NA | 0.305 | 2.24E-05        | 0.053  | 1               |
| SE | SCML1      | + | chrX:17744070-17744219    | NA | 0.304 | 5.26E-08        | 0.079  | 1               |
| SE | FECH       | - | chr18:57585863-57585973   | NA | 0.304 | 0.02354481015   | -0.01  | 1               |
| SE | THRB       | - | chr3:24297225-24297371    | NA | 0.304 | 0.005335128453  | -0.153 | 1               |
| SE | C17orf62   | - | chr17:82447579-82447646   | NA | 0.304 | 0.01212190181   | -0.058 | 5.68E-07        |
| SE | RIPK2      | + | chr8:89762828-89762982    | NA | 0.303 | 0.007952215332  | -0.015 | 1               |
| SE | METTL25    | + | chr12:82456726-82456820   | NA | 0.303 | 0.02240571123   | 0.006  | 1               |
| SE | SPEG       | + | chr2:219444029-219444059  | NA | 0.302 | 0.002168602909  | -0.005 | 1               |
| SE | CCDC176    | + | chr14:74046059-74046130   | NA | 0.302 | 0.01050857481   | 0.054  | 1               |
| SE | FBXO44     | + | chr1:11655327-11655699    | NA | 0.302 | 0.001244028305  | -0.007 | 1               |
| SE | TPCN2      | + | chr11:69079833-69079883   | NA | 0.302 | 0.004265354996  | -0.156 | 8.11E-05        |
| SE | RBM6       | + | chr3:49972058-49972148    | NA | 0.301 | 1.54E-10        | -0.019 | 1               |
| SE | ULK4       | - | chr3:41819422-41819506    | NA | 0.301 | 8.15E-05        | -0.019 | 1               |
| SE | SBNO2      | - | chr19:1147308-1147420     | NA | 0.3   | 0.001484505828  | -0.001 | 1               |
| SE | TCF7       | + | chr5:134144796-134144869  | NA | 0.3   | 0.003218971638  | 0.242  | 2.65E-09        |
| SE | NPHP3      | - | chr3:132717954-132718117  | NA | 0.3   | 0.0001161877562 | 0.042  | 1               |
| SE | PRIMPOL    | + | chr4:184682247-184682336  | NA | 0.3   | 0.001312112384  | -0.063 | 1               |
| SE | COA1       | - | chr7:43665657-43665722    | NA | 0.299 | 5.25E-12        | 0.171  | 3.71E-07        |
| SE | FBXL4      | - | chr6:98880552-98880624    | NA | 0.299 | 0.0008985289339 | -0.029 | 0.06462676519   |
| SE | PTK2       | - | chr8:140925660-140925749  | NA | 0.299 | 1.81E-10        | -0.015 | 1               |
| SE | UBE2G2     | - | chr21:44774566-44774741   | NA | 0.299 | 1.20E-05        | 0.01   | 1               |
| SE | NPHP3      | - | chr3:132699352-132699450  | NA | 0.298 | 0.002000095534  | -0.089 | 0.6590073355    |
| SE | SEC31A     | - | chr4:82862533-82862572    | NA | 0.298 | 6.25E-12        | -0.015 | 1               |
| SE | SLC25A22   | - | chr11:796042-796367       | NA | 0.298 | 0.0003906458635 | -0.071 | 1               |
| SE | WDR27      | - | chr6:169670568-169670693  | NA | 0.297 | 2.79E-06        | 0.007  | 1               |
| SE | ADAMTS6    | - | chr5:65470777-65471142    | NA | 0.295 | 6.69E-05        | -0.013 | 1               |
| SE | WDR35      | - | chr2:19960553-19960614    | NA | 0.295 | 3.39E-07        | -0.011 | 1               |
| SE | SGCE       | - | chr7:94644605-94644667    | NA | 0.295 | 0.002784788117  | 0.061  | 1               |
| SE | ENOSF1     | - | chr18:691203-691276       | NA | 0.295 | 0.0006544003966 | -0.093 | 1               |
| SE | ANKMY1     | - | chr2:240557189-240557352  | NA | 0.295 | 0.009947313719  | -0.203 | 1               |
| SE | MTCL1      | + | chr18:8809447-8809561     | NA | 0.295 | 3.95E-10        | -0.035 | 1               |
| SE | FAM118B    | + | chr11:126229224-126229336 | NA | 0.294 | 0.006913625577  | -0.064 | 1               |

|    |            |   |                           |    |       |                 |        |                 |
|----|------------|---|---------------------------|----|-------|-----------------|--------|-----------------|
| SE | EPB41L1    | + | chr20:36195328-36195364   | NA | 0.293 | 0.001588997599  | 0.136  | 7.06E-06        |
| SE | MTA1       | + | chr14:105445666-105445852 | NA | 0.292 | 0               | -0.047 | 1               |
| SE | ZMYM1      | + | chr1:35093393-35093441    | NA | 0.292 | 0.0004387441602 | 0.15   | 1               |
| SE | AP4M1      | + | chr7:100102245-100102393  | NA | 0.292 | 1.62E-12        | 0.016  | 0.01138816182   |
| SE | ZNF83      | - | chr19:52616717-52616815   | NA | 0.291 | 1.25E-05        | 0.035  | 1               |
| SE | CD320      | - | chr19:8305030-8305805     | NA | 0.291 | 0.02730924673   | -0.073 | 0.05327408743   |
| SE | KIAA1109   | + | chr4:122226706-122226835  | NA | 0.29  | 0.005433588589  | 0.055  | 1               |
| SE | RFWD2      | - | chr1:176136487-176136547  | NA | 0.29  | 2.21E-05        | 0.009  | 1               |
| SE | TMEM143    | - | chr19:48360071-48360176   | NA | 0.29  | 0.04513725149   | -0.053 | 1               |
| SE | ARAP1      | - | chr11:72732514-72732597   | NA | 0.29  | 0.002607277755  | -0.012 | 1               |
| SE | MRPL22     | + | chr5:154950802-154950938  | NA | 0.289 | 1.18E-07        | -0.09  | 1.19E-13        |
| SE | PRDM2      | + | chr1:13778417-13782831    | NA | 0.289 | 2.58E-09        | 0.016  | 1               |
| SE | TYSND1     | - | chr10:70143841-70143972   | NA | 0.289 | 0.000311701948  | 0.001  | 1               |
| SE | SYNJ1      | - | chr21:32634860-32634881   | NA | 0.289 | 6.83E-05        | 0.129  | 1               |
| SE | PKIG       | + | chr20:44585099-44585204   | NA | 0.289 | 0.002174269931  | -0.012 | 2.33E-10        |
| SE | ARPP19     | - | chr15:52564189-52564246   | NA | 0.288 | 3.04E-05        | -0.018 | 1               |
| SE | CLSTN1     | - | chr1:9737497-9737554      | NA | 0.288 | 0               | 0.088  | 0               |
| SE | NAGPA      | - | chr16:5028296-5028398     | NA | 0.287 | 0.00234344699   | 0.026  | 0.1222207181    |
| SE | CAPN7      | + | chr3:15245525-15245671    | NA | 0.287 | 0.001480159749  | -0.027 | 1.99E-08        |
| SE | FANCA      | - | chr16:89762637-89762793   | NA | 0.287 | 5.88E-11        | 0.013  | 1               |
| SE | TMEM117    | + | chr12:44143524-44143624   | NA | 0.285 | 0.006170354981  | -0.014 | 1               |
| SE | PILRB      | + | chr7:100353894-100354012  | NA | 0.284 | 7.18E-05        | 0.056  | 0.05251272139   |
| SE | PQLC3      | + | chr2:11172750-11172824    | NA | 0.284 | 0.005969129601  | 0.138  | 1               |
| SE | PTPRD      | - | chr9:8437197-8437239      | NA | 0.283 | 6.82E-05        | 0.04   | 1               |
| SE | ATP5H      | - | chr17:75039871-75040041   | NA | 0.283 | 0.01033447427   | -0.118 | 1               |
| SE | BAZ2B      | - | chr2:159430862-159431156  | NA | 0.282 | 0.02202842779   | 0.033  | 1               |
| SE | FNBP1      | - | chr9:129923843-129924026  | NA | 0.282 | 0.004212179557  | -0.012 | 1               |
| SE | SPEG       | + | chr2:219444024-219444059  | NA | 0.281 | 0.001400638034  | 0      | 1               |
| SE | AC024560.3 | - | chr3:197622186-197622330  | NA | 0.281 | 3.78E-07        | -0.124 | 2.03E-05        |
| SE | TCF20      | - | chr22:42168608-42168736   | NA | 0.28  | 0.04608462819   | 0.218  | 0               |
| SE | CDK16      | + | chrX:47222260-47222380    | NA | 0.28  | 0.004926977751  | 0.032  | 0.9951118393    |
| SE | NME4       | + | chr16:398207-398385       | NA | 0.28  | 0.0349971465    | 0.01   | 1               |
| SE | MAST1      | + | chr19:12865315-12865481   | NA | 0.28  | 0.03825624706   | 0.001  | 1               |
| SE | SPATS2     | + | chr12:49371227-49371290   | NA | 0.28  | 1.33E-05        | 0.122  | 0.002406835435  |
| SE | IKZF4      | + | chr12:56024661-56024905   | NA | 0.279 | 0.004728450157  | 0.158  | 1               |
| SE | FOXD3-AS1  | - | chr1:63321664-63322080    | NA | 0.279 | 0.002721675563  | 0.068  | 0.04617524532   |
| SE | APAF1      | + | chr12:98703370-98703499   | NA | 0.278 | 0.001135475143  | -0.039 | 0.9007699827    |
| SE | CASK       | - | chrX:41555599-41555635    | NA | 0.278 | 1.34E-11        | 0.011  | 1               |
| SE | C9orf89    | + | chr9:93111878-93111938    | NA | 0.278 | 1.56E-08        | -0.073 | 3.47E-06        |
| SE | SUZ12P1    | + | chr17:30743300-30743369   | NA | 0.278 | 0.0002914239142 | 0.008  | 1               |
| SE | CAMTA2     | - | chr17:4982088-4982227     | NA | 0.274 | 0.002049001138  | 0.018  | 1               |
| SE | LUC7L3     | + | chr17:50738136-50738199   | NA | 0.274 | 3.31E-09        | -0.171 | 1               |
| SE | ITGB3BP    | - | chr1:63446805-63446856    | NA | 0.274 | 0               | -0.009 | 1               |
| SE | TBC1D8B    | + | chrX:106839325-106839457  | NA | 0.271 | 4.34E-05        | -0.054 | 1               |
| SE | CDK5RAP2   | - | chr9:120460571-120460667  | NA | 0.271 | 3.89E-05        | -0.023 | 1               |
| SE | ALKBH8     | - | chr11:107549752-107549823 | NA | 0.271 | 0.0001857822036 | -0.059 | 1               |
| SE | WDR35      | - | chr2:19932382-19932447    | NA | 0.27  | 8.36E-07        | -0.002 | 1               |
| SE | KIAA1109   | + | chr4:122325854-122325917  | NA | 0.27  | 0.01494049834   | -0.056 | 0.0001767220318 |
| SE | CD27-AS1   | - | chr12:6450340-6450980     | NA | 0.27  | 0.01669192307   | 0.009  | 1               |
| SE | RFX3       | - | chr9:3301545-3301620      | NA | 0.269 | 3.88E-05        | 0.042  | 0.0003000116087 |
| SE | SLC25A10   | + | chr17:81713261-81713506   | NA | 0.269 | 0.001237237216  | -0.015 | 1               |
| SE | SEC31A     | - | chr4:82862533-82862572    | NA | 0.268 | 7.13E-06        | 0.022  | 1               |
| SE | TPM1       | + | chr15:63061712-63061788   | NA | 0.268 | 6.41E-13        | 0.07   | 5.59E-09        |
| SE | DLEU1      | + | chr13:50083141-50083194   | NA | 0.268 | 8.10E-07        | -0.098 | 0.003387663196  |
| SE | BCOR       | - | chrX:40071636-40071690    | NA | 0.268 | 0.002441790178  | 0.064  | 1               |
| SE | NAGLU      | + | chr17:42537397-42537545   | NA | 0.267 | 0.002270954097  | -0.064 | 4.33E-07        |
| SE | MCCC2      | + | chr5:71626639-71626753    | NA | 0.267 | 2.16E-05        | -0.016 | 1               |
| SE | PPIP5K2    | + | chr5:103187313-103187376  | NA | 0.267 | 0.02576515749   | 0.085  | 0.08718094723   |
| SE | NBN        | - | chr8:89981952-89982002    | NA | 0.266 | 0.02189479798   | -0.016 | 1               |
| SE | CTNND1     | + | chr11:57806460-57806478   | NA | 0.266 | 4.23E-10        | 0.196  | 0               |
| SE | FAM13B     | - | chr5:137956476-137956542  | NA | 0.265 | 0.002442117802  | -0.064 | 0.9867544371    |
| SE | R3HDM1     | + | chr2:135616151-135616193  | NA | 0.265 | 0.01888167559   | -0.014 | 1               |
| SE | CAMTA2     | - | chr17:4982088-4982175     | NA | 0.265 | 0.003568838564  | 0.013  | 1               |

|    |            |   |                           |    |       |                 |        |                 |
|----|------------|---|---------------------------|----|-------|-----------------|--------|-----------------|
| SE | LRRFIP1    | + | chr2:237751199-237751271  | NA | 0.265 | 0               | 0.059  | 0               |
| SE | ATAT1      | + | chr6:30640534-30640603    | NA | 0.265 | 0.02320561358   | -0.094 | 1.11E-12        |
| SE | RHOQ       | + | chr2:46543753-46543812    | NA | 0.264 | 0.005789128017  | -0.002 | 1               |
| SE | FAM122B    | - | chrX:134772142-134772283  | NA | 0.264 | 2.18E-10        | 0.016  | 1               |
| SE | ARHGEF3    | - | chr3:57007181-57007336    | NA | 0.264 | 0.001289105061  | -0.045 | 1               |
| SE | PRR3       | + | chr6:30561327-30561508    | NA | 0.264 | 0.01244086474   | -0.031 | 0.3827413428    |
| SE | POLDIP3    | - | chr22:42601969-42602107   | NA | 0.263 | 0.007773580358  | -0.067 | 0.07531317234   |
| SE | PARD3      | - | chr10:34372497-34372536   | NA | 0.263 | 8.40E-06        | 0.039  | 0.2716532777    |
| SE | SON        | + | chr21:33572550-33572630   | NA | 0.263 | 0               | -0.024 | 1               |
| SE | RP11-1212A | - | chr16:18372577-18372854   | NA | 0.263 | 0.03838602055   | -0.072 | 1               |
| SE | BRD8       | - | chr5:138159554-138159599  | NA | 0.262 | 0.0001421619531 | 0.046  | 6.12E-06        |
| SE | MFSD6      | + | chr2:190415291-190415413  | NA | 0.262 | 0.01422507111   | 0.016  | 1               |
| SE | TCEA1      | - | chr8:54002891-54003086    | NA | 0.261 | 0.0075854768    | 0.005  | 0.4694765891    |
| SE | FAM118B    | + | chr11:126229224-126229293 | NA | 0.261 | 0.003200271846  | -0.031 | 1               |
| SE | TRIM35     | - | chr8:27290155-27290178    | NA | 0.26  | 0.0007441076698 | -0.052 | 1               |
| SE | ZBTB14     | - | chr18:5293971-5294001     | NA | 0.26  | 0.002715613574  | -0.021 | 1               |
| SE | PTPRS      | - | chr19:5218786-5218798     | NA | 0.259 | 0.005967428301  | -0.049 | 1.09E-05        |
| SE | UHRF2      | + | chr9:6495584-6497103      | NA | 0.259 | 3.07E-05        | 0.011  | 0.0004981566378 |
| SE | SMTN       | + | chr22:31080449-31080754   | NA | 0.259 | 0.002442197371  | -0.008 | 1               |
| SE | PRKD1      | - | chr14:29656475-29656499   | NA | 0.259 | 1.68E-07        | 0.131  | 1.22E-06        |
| SE | RP11-295P  | + | chr10:13652845-13653148   | NA | 0.259 | 0.0255521065    | 0.011  | 1               |
| SE | RAD51AP1   | + | chr12:4545218-4545312     | NA | 0.258 | 1.28E-05        | 0.026  | 1               |
| SE | NASP       | + | chr1:45607320-45608337    | NA | 0.258 | 0.01542938513   | 0.122  | 0.0001609554291 |
| SE | PCGF3      | + | chr4:732399-732498        | NA | 0.258 | 0.03122303962   | -0.024 | 1               |
| SE | UBE2Q2P2   | + | chr15:82415527-82415675   | NA | 0.258 | 0.002987989726  | -0.074 | 1               |
| SE | ISYNA1     | - | chr19:18437598-18437760   | NA | 0.257 | 0.01175358981   | -0.029 | 1               |
| SE | MTMR4      | - | chr17:58514991-58515083   | NA | 0.257 | 0.0005045853247 | -0.007 | 1               |
| SE | RIC8B      | + | chr12:106874480-106874567 | NA | 0.257 | 0.001966429415  | -0.019 | 1               |
| SE | LPHN2      | + | chr1:81987288-81987341    | NA | 0.256 | 1.66E-05        | -0.047 | 0.2525992523    |
| SE | LRRRC23    | + | chr12:6909889-6910026     | NA | 0.254 | 0.0001253084563 | -0.056 | 1.94E-06        |
| SE | TNRC6A     | + | chr16:24793472-24793649   | NA | 0.254 | 1.07E-06        | 0.191  | 1.41E-06        |
| SE | CENPA      | + | chr2:26792501-26792833    | NA | 0.254 | 0.0005141992172 | -0.009 | 1               |
| SE | SRRM1      | + | chr1:24663182-24663224    | NA | 0.254 | 5.46E-06        | 0.061  | 0.05116587074   |
| SE | APLP1      | + | chr19:35878084-35878108   | NA | 0.253 | 4.07E-05        | 0.02   | 0               |
| SE | EVI5L      | + | chr19:7857091-7857124     | NA | 0.253 | 0.009226021974  | 0.165  | 1.47E-10        |
| SE | LUZP1      | - | chr1:23109584-23109650    | NA | 0.253 | 0.017863027     | -0.144 | 1               |
| SE | BTF3L4     | + | chr1:52083339-52083541    | NA | 0.252 | 2.12E-09        | 0.007  | 1               |
| SE | HDAC11     | + | chr3:13496735-13496852    | NA | 0.252 | 0.006200467481  | -0.002 | 1               |
| SE | TIAL1      | - | chr10:119580470-119580846 | NA | 0.251 | 0.008171877175  | 0.012  | 0.0005019871937 |
| SE | CACNB4     | - | chr2:151860710-151860820  | NA | 0.251 | 0.005673378401  | -0.068 | 1               |
| SE | IQGAP3     | - | chr1:156554234-156554392  | NA | 0.251 | 0.001556186387  | -0.05  | 1               |
| SE | ZMYND8     | - | chr20:47212641-47212725   | NA | 0.25  | 0.0003587716172 | -0.105 | 4.56E-06        |
| SE | MTSS1L     | - | chr16:70665465-70665540   | NA | 0.25  | 0.001167925376  | 0.007  | 1               |
| SE | CHEK2      | - | chr22:28696900-28696987   | NA | 0.25  | 1.08E-13        | -0.001 | 1               |
| SE | FAM86EP    | - | chr4:3954959-3955033      | NA | 0.25  | 0.00443138389   | -0.024 | 1               |
| SE | SEMA6C     | - | chr1:151138315-151138406  | NA | 0.248 | 0.02759566031   | -0.044 | 0.002697885149  |
| SE | ARHGEF40   | + | chr14:21075622-21075765   | NA | 0.248 | 0.0008843185609 | -0.034 | 0               |
| SE | RBM5       | + | chr3:50110378-50110463    | NA | 0.247 | 0               | -0.036 | 0               |
| SE | FUK        | + | chr16:70469151-70469323   | NA | 0.247 | 0.002737544214  | -0.038 | 0.00249957137   |
| SE | TMEM9B     | - | chr11:8962091-8962183     | NA | 0.247 | 1.02E-08        | -0.014 | 0.01444928176   |
| SE | WHSC1      | + | chr4:1942338-1942565      | NA | 0.246 | 0.0001438727222 | 0.062  | 0.2939917334    |
| SE | CD46       | + | chr1:207767778-207767823  | NA | 0.246 | 2.53E-05        | -0.029 | 1               |
| SE | GPR155     | - | chr2:174482872-174482918  | NA | 0.246 | 8.71E-05        | 0.034  | 1               |
| SE | XRRA1      | - | chr11:74930299-74930372   | NA | 0.246 | 0.01359356348   | -0.011 | 1               |
| SE | METTL4     | - | chr18:2544652-2544759     | NA | 0.245 | 4.20E-07        | 0.02   | 1               |
| SE | CDK16      | + | chrX:47222260-47222342    | NA | 0.245 | 0.01326260223   | 0.01   | 1               |
| SE | STAMPB     | + | chr2:73829404-73829510    | NA | 0.245 | 1.54E-05        | 0.096  | 0.00306661764   |
| SE | ZNF83      | - | chr19:52616717-52616875   | NA | 0.245 | 1.38E-05        | 0.054  | 0.9530455421    |
| SE | MYLK       | - | chr3:123732895-123733102  | NA | 0.244 | 0.0001112824625 | 0.131  | 1               |
| SE | TMEM62     | + | chr15:43178606-43178711   | NA | 0.244 | 3.47E-05        | -0.033 | 1               |
| SE | CNNM3      | + | chr2:96831968-96832068    | NA | 0.242 | 3.12E-05        | 0.14   | 1.16E-12        |
| SE | ZNF615     | - | chr19:52007292-52007330   | NA | 0.242 | 0.006828710607  | -0.026 | 1               |
| SE | March7     | + | chr2:159715680-159715766  | NA | 0.241 | 0.01974476361   | -0.119 | 1               |

|    |          |   |                           |    |       |                 |        |                 |
|----|----------|---|---------------------------|----|-------|-----------------|--------|-----------------|
| SE | DRAM2    | - | chr1:111122615-111122643  | NA | 0.241 | 0.006855151817  | -0.025 | 1               |
| SE | PPIP5K2  | + | chr5:103176865-103176910  | NA | 0.24  | 7.34E-12        | 0      | 1               |
| SE | FAM189B  | - | chr1:155253858-155253978  | NA | 0.24  | 0.008470168692  | -0.031 | 1               |
| SE | HYI      | - | chr1:43452902-43453004    | NA | 0.24  | 0.02445759739   | 0.001  | 1               |
| SE | CAMTA2   | - | chr17:4982088-4982160     | NA | 0.239 | 0.0003906458635 | 0.005  | 1               |
| SE | NSRP1    | + | chr17:30118079-30118173   | NA | 0.239 | 0.002111221232  | 0.026  | 1               |
| SE | ARL14EP  | + | chr11:30330885-30331374   | NA | 0.239 | 4.00E-13        | 0.032  | 5.08E-07        |
| SE | ZFYVE19  | + | chr15:40809155-40809240   | NA | 0.239 | 1.17E-08        | -0.016 | 1               |
| SE | LTB4R2   | + | chr14:24310170-24310255   | NA | 0.239 | 0.007647461604  | -0.148 | 1               |
| SE | TJP1     | - | chr15:29719776-29720016   | NA | 0.238 | 2.38E-05        | -0.019 | 1               |
| SE | TTYH3    | + | chr7:2647958-2648054      | NA | 0.238 | 8.35E-09        | 0      | 1               |
| SE | FAM168A  | - | chr11:73425021-73425048   | NA | 0.237 | 5.74E-10        | 0.122  | 1               |
| SE | CBWD5    | + | chr9:65732946-65733122    | NA | 0.237 | 0.000307827365  | -0.009 | 1               |
| SE | CELF1    | - | chr11:47500860-47500932   | NA | 0.237 | 0.02326580329   | -0.048 | 1               |
| SE | PLA2G6   | - | chr22:38125638-38125691   | NA | 0.237 | 0.03472346189   | -0.14  | 9.74E-12        |
| SE | LTBP4    | + | chr19:40622949-40623021   | NA | 0.236 | 1.52E-05        | -0.084 | 3.01E-05        |
| SE | PTPRS    | - | chr19:5216719-5216767     | NA | 0.236 | 3.60E-08        | 0.06   | 0.3354210696    |
| SE | BAZ2B    | - | chr2:159397073-159397100  | NA | 0.236 | 0.0006556996521 | -0.048 | 1               |
| SE | PSMG1    | - | chr21:39179923-39179986   | NA | 0.236 | 2.86E-10        | -0.001 | 1               |
| SE | MPHOSPH9 | - | chr12:123226287-123226351 | NA | 0.235 | 5.93E-06        | 0.125  | 1               |
| SE | SLC26A6  | - | chr3:48632244-48632337    | NA | 0.235 | 0.01192185245   | -0.04  | 1               |
| SE | ARFIP1   | + | chr4:152870752-152870848  | NA | 0.234 | 2.20E-11        | -0.077 | 0.1913637849    |
| SE | JKAMP    | + | chr14:59486712-59486804   | NA | 0.233 | 2.89E-14        | 0.001  | 1               |
| SE | ACIN1    | - | chr14:23089981-23090101   | NA | 0.233 | 0.02847082484   | -0.092 | 0.1548117789    |
| SE | WARS     | - | chr14:100375282-100375403 | NA | 0.232 | 1.37E-10        | -0.081 | 0.02690079185   |
| SE | HGSNAT   | + | chr8:43173712-43173743    | NA | 0.232 | 0.002089000179  | -0.022 | 1               |
| SE | TOP1MT   | - | chr8:143332486-143332601  | NA | 0.232 | 8.45E-05        | 0.065  | 0.05902137746   |
| SE | IFT88    | + | chr13:20615792-20615879   | NA | 0.231 | 0.0002900265419 | -0.005 | 0.004249519972  |
| SE | RTN4     | - | chr2:55025085-55027485    | NA | 0.231 | 0.0003550262261 | 0.333  | 0               |
| SE | SGOL1    | - | chr3:20174248-20175055    | NA | 0.231 | 0.002075918316  | 0.004  | 1               |
| SE | GPR155   | - | chr2:174482872-174482918  | NA | 0.231 | 0.0001494592795 | -0.13  | 1               |
| SE | FLYWCH1  | + | chr16:2913005-2913250     | NA | 0.23  | 0.003866750586  | -0.029 | 0.11362415      |
| SE | NEDD1    | + | chr12:96907701-96907856   | NA | 0.23  | 0.001184309423  | -0.05  | 1               |
| SE | ZNF440   | + | chr19:11830273-11830409   | NA | 0.23  | 0.00448074171   | -0.009 | 1               |
| SE | WDR45    | - | chrX:49077642-49077747    | NA | 0.23  | 0.002782540749  | -0.023 | 2.85E-05        |
| SE | LTBP4    | + | chr19:40622949-40623021   | NA | 0.229 | 4.13E-11        | -0.039 | 0               |
| SE | POLDIP3  | - | chr22:42601969-42602056   | NA | 0.229 | 0.005634242534  | -0.038 | 0.005666031768  |
| SE | SYTL2    | - | chr11:85704857-85705028   | NA | 0.229 | 2.15E-05        | -0.006 | 1               |
| SE | THUMPD2  | - | chr2:39768900-39769093    | NA | 0.229 | 0.0009046763203 | 0.027  | 1               |
| SE | FANCD2   | + | chr3:10064355-10064429    | NA | 0.229 | 6.59E-06        | -0.008 | 1               |
| SE | ZBTB43   | + | chr9:126808792-126808915  | NA | 0.229 | 0.006518544222  | 0.001  | 1               |
| SE | FAM66C   | + | chr12:8187731-8188225     | NA | 0.229 | 0.03557962837   | -0.021 | 1               |
| SE | RBM23    | - | chr14:22908332-22908380   | NA | 0.228 | 1.15E-05        | -0.041 | 0.01356018259   |
| SE | SLC29A1  | + | chr6:44225972-44226167    | NA | 0.228 | 3.37E-06        | -0.113 | 1               |
| SE | KLC1     | + | chr14:103692358-103692425 | NA | 0.228 | 0.003905473379  | -0.031 | 0.03628582128   |
| SE | RPS6KB2  | + | chr11:67432355-67432492   | NA | 0.228 | 0.003857761711  | 0.094  | 1.96E-10        |
| SE | PUF60    | - | chr8:143824312-143824396  | NA | 0.228 | 0.008185219315  | -0.04  | 0.0002717723216 |
| SE | DYNC2H1  | + | chr11:103287532-103287605 | NA | 0.228 | 1.53E-05        | -0.004 | 1               |
| SE | UPRT     | + | chrX:75294562-75294620    | NA | 0.227 | 0.0002487257324 | 0.023  | 1               |
| SE | RHEB     | - | chr7:151498088-151498180  | NA | 0.227 | 0.001382000474  | 0      | 1               |
| SE | ZNF815P  | + | chr7:5833526-5833568      | NA | 0.226 | 0.016092165     | -0.008 | 1               |
| SE | MAPK8IP3 | + | chr16:1758147-1758159     | NA | 0.225 | 2.71E-05        | 0      | 1               |
| SE | ZNF83    | - | chr19:52616717-52616841   | NA | 0.225 | 7.13E-05        | 0.036  | 1               |
| SE | MIS12    | + | chr17:5487556-5487694     | NA | 0.225 | 1.66E-10        | 0.046  | 1               |
| SE | PSMG4    | + | chr6:3264208-3264325      | NA | 0.225 | 0               | 0      | 1               |
| SE | WNK1     | + | chr12:880720-880999       | NA | 0.224 | 0.0001029798356 | 0.018  | 1               |
| SE | ZFAND1   | - | chr8:81717248-81717288    | NA | 0.224 | 0.04922594537   | 0.012  | 1               |
| SE | KDM4C    | + | chr9:7105401-7105500      | NA | 0.224 | 0.03074448238   | 0.042  | 0.06438158474   |
| SE | LPHN3    | + | chr4:61730621-61730636    | NA | 0.224 | 0.001796423469  | 0.049  | 1               |
| SE | MIOS     | + | chr7:7567606-7567688      | NA | 0.224 | 0.02561488547   | 0.079  | 1               |
| SE | GAS5     | - | chr1:173864674-173864704  | NA | 0.223 | 0.0005287084667 | 0.131  | 1               |
| SE | MRPL22   | + | chr5:154950820-154950938  | NA | 0.222 | 3.60E-08        | -0.07  | 0               |
| SE | KIF21A   | - | chr12:39315931-39315970   | NA | 0.222 | 7.86E-05        | 0.229  | 1               |

|    |           |   |                           |    |       |                 |        |                 |   |
|----|-----------|---|---------------------------|----|-------|-----------------|--------|-----------------|---|
| SE | EIF4A2    | + | chr3:186788309-186788420  | NA | 0.222 | 0.00365172218   | -0.009 |                 | 1 |
| SE | RPS6KB2   | + | chr11:67432352-67432492   | NA | 0.222 | 0.00513160654   | 0.094  | 1.32E-10        |   |
| SE | TBL2      | - | chr7:73576540-73576701    | NA | 0.221 | 0.006525933172  | 0.014  | 0.3044475248    |   |
| SE | EEF2KMT   | - | chr16:5097279-5097353     | NA | 0.221 | 0.006146579901  | 0.019  |                 | 1 |
| SE | CAMK2G    | - | chr10:73818208-73818895   | NA | 0.221 | 0.01243956146   | 0.008  |                 | 1 |
| SE | FLVCR1    | + | chr1:212863724-212863869  | NA | 0.221 | 2.23E-05        | -0.041 |                 | 1 |
| SE | ADAM22    | + | chr7:88186614-88186701    | NA | 0.22  | 4.44E-07        | 0.098  | 8.84E-06        |   |
| SE | DNM1      | + | chr9:128240986-128241047  | NA | 0.22  | 0.04612861764   | -0.016 |                 | 1 |
| SE | SLC29A1   | + | chr6:44226060-44226167    | NA | 0.22  | 0.003873995416  | -0.112 |                 | 1 |
| SE | TICRR     | + | chr15:89592046-89592176   | NA | 0.22  | 1.65E-05        | -0.005 |                 | 1 |
| SE | BEND6     | + | chr6:57018420-57018557    | NA | 0.22  | 0.02050644615   | 0.002  |                 | 1 |
| SE | RIF1      | + | chr2:151468473-151468551  | NA | 0.219 | 0.001720428133  | 0.044  |                 | 1 |
| SE | PLK3      | + | chr1:44804649-44804779    | NA | 0.219 | 0.01310929813   | -0.009 |                 | 1 |
| SE | THRAP3    | + | chr1:36225411-36225463    | NA | 0.218 | 0.01278202333   | -0.001 |                 | 1 |
| SE | THOC5     | - | chr22:29550727-29550843   | NA | 0.218 | 2.53E-08        | -0.011 |                 | 1 |
| SE | BRD8      | - | chr5:138157641-138157894  | NA | 0.218 | 0.001234249565  | 0.16   | 5.27E-06        |   |
| SE | INTS3     | + | chr1:153753700-153753818  | NA | 0.218 | 0.01176581464   | 0.095  |                 | 1 |
| SE | LRRC75A-A | + | chr17:16460892-16461245   | NA | 0.218 | 0.04305333938   | -0.12  |                 | 1 |
| SE | RBMS1     | - | chr2:160282256-160282304  | NA | 0.217 | 0.02751345708   | -0.031 |                 | 1 |
| SE | UPF3A     | + | chr13:114286301-114286400 | NA | 0.217 | 0.0008678622588 | 0.02   |                 | 1 |
| SE | ICA1      | - | chr7:8138984-8139047      | NA | 0.216 | 5.39E-06        | -0.003 |                 | 1 |
| SE | EPS15     | - | chr1:51459040-51459148    | NA | 0.216 | 0.04158645599   | 0.064  |                 | 1 |
| SE | FXR1      | + | chr3:180971074-180971155  | NA | 0.216 | 0               | 0.049  | 0.0001362988217 |   |
| SE | SMG7      | + | chr1:183547102-183547252  | NA | 0.216 | 0.0002682286217 | -0.004 |                 | 1 |
| SE | CEP164    | + | chr11:117363428-117363506 | NA | 0.215 | 0.01185604305   | 0.037  |                 | 1 |
| SE | DCAF10    | + | chr9:37857240-37857351    | NA | 0.214 | 0.02641179415   | -0.03  |                 | 1 |
| SE | SNAPIN    | + | chr1:153659137-153659184  | NA | 0.214 | 7.04E-09        | -0.048 |                 | 0 |
| SE | CBWD5     | + | chr9:65732992-65733122    | NA | 0.214 | 0.0003888102782 | -0.009 |                 | 1 |
| SE | ZNF507    | + | chr19:32347244-32347338   | NA | 0.214 | 0.004718480332  | 0.016  |                 | 1 |
| SE | CTC-444N2 | - | chr19:57278115-57278182   | NA | 0.214 | 0.02156029198   | 0.021  |                 | 1 |
| SE | UBE3A     | - | chr15:25407066-25407137   | NA | 0.213 | 0.0001454345137 | 0.007  |                 | 1 |
| SE | LSM14B    | + | chr20:62127584-62127701   | NA | 0.213 | 0.00694961065   | 0.129  | 1.21E-05        |   |
| SE | SACS      | - | chr13:23341444-23341690   | NA | 0.213 | 1.17E-10        | -0.08  |                 | 1 |
| SE | MYT1      | + | chr20:64223290-64223359   | NA | 0.213 | 0.008775297312  | 0.156  |                 | 1 |
| SE | DHRS4-AS1 | - | chr14:23953773-23954033   | NA | 0.213 | 0.004865530267  | 0.007  |                 | 1 |
| SE | VPS53     | - | chr17:661808-661895       | NA | 0.212 | 0.0001833798291 | -0.009 |                 | 1 |
| SE | SREK1     | + | chr5:66158808-66158932    | NA | 0.212 | 0.01430870942   | 0.02   |                 | 1 |
| SE | PCBP4     | - | chr3:51961748-51962088    | NA | 0.211 | 0.01378706426   | -0.014 |                 | 1 |
| SE | SEC22C    | - | chr3:42563764-42563980    | NA | 0.211 | 0               | -0.011 | 0.01905582287   |   |
| SE | FLT3LG    | + | chr19:49480297-49480476   | NA | 0.21  | 0.009473724616  | 0.004  |                 | 1 |
| SE | ECHDC2    | - | chr1:52905033-52906611    | NA | 0.209 | 0.0008643964118 | 0.013  |                 | 1 |
| SE | NUMB      | - | chr14:73316389-73316422   | NA | 0.209 | 1.27E-06        | 0.032  |                 | 1 |
| SE | DEPDC5    | + | chr22:31861367-31861433   | NA | 0.208 | 0.0009982071298 | 0.311  |                 | 0 |
| SE | FAM219B   | - | chr15:74904981-74905059   | NA | 0.208 | 7.91E-05        | -0.009 |                 | 1 |
| SE | BCL2L13   | + | chr22:17696140-17696210   | NA | 0.207 | 4.22E-06        | -0.004 |                 | 1 |
| SE | PHKB      | + | chr16:47463881-47463993   | NA | 0.207 | 0.002682815417  | 0.065  |                 | 1 |
| SE | POLG      | - | chr15:89332217-89332374   | NA | 0.207 | 0.002540358248  | -0.007 |                 | 1 |
| SE | NPRL3     | - | chr16:117300-117375       | NA | 0.206 | 0.005136856933  | -0.035 | 0.09544121561   |   |
| SE | RPL13A    | + | chr19:49489849-49490090   | NA | 0.206 | 2.84E-05        | 0      |                 | 1 |
| SE | H2AFY     | - | chr5:135350822-135350913  | NA | 0.205 | 0               | -0.006 | 0.08520446241   |   |
| SE | WARS      | - | chr14:100375282-100375350 | NA | 0.205 | 7.15E-10        | -0.097 | 0.011127145     |   |
| SE | MRPS28    | - | chr8:80028694-80028796    | NA | 0.205 | 0.01136970053   | 0.061  |                 | 1 |
| SE | IL17RC    | + | chr3:9930399-9930459      | NA | 0.205 | 0.003957427051  | -0.025 | 0.07451454225   |   |
| SE | PRKAG1    | - | chr12:49005742-49005881   | NA | 0.205 | 2.77E-08        | -0.059 | 1.54E-07        |   |
| SE | LPHN1     | - | chr19:14167015-14167030   | NA | 0.204 | 0.002071693895  | 0.138  | 0.0002093392385 |   |
| SE | PHKB      | + | chr16:47463898-47463993   | NA | 0.204 | 0.0007058046358 | 0.047  |                 | 1 |
| SE | DGUOK     | + | chr2:73957124-73957240    | NA | 0.204 | 0.002786142805  | 0.146  |                 | 0 |
| SE | CCDC15    | + | chr11:125003866-125003959 | NA | 0.204 | 0.0007539629551 | -0.004 |                 | 1 |
| SE | SUN1      | + | chr7:849519-849603        | NA | 0.204 | 0.01249196002   | -0.094 |                 | 1 |
| SE | PCGF3     | + | chr4:732443-732498        | NA | 0.204 | 0.04316493501   | -0.023 |                 | 1 |
| SE | PGAP1     | - | chr2:196892345-196892401  | NA | 0.204 | 0.02951502951   | -0.002 |                 | 1 |
| SE | AGTPBP1   | - | chr9:85660935-85660973    | NA | 0.203 | 0.002196361706  | -0.006 |                 | 1 |
| SE | TANC2     | + | chr17:63151269-63151380   | NA | 0.203 | 0.0003699647386 | 0.104  |                 | 1 |

|    |             |   |                           |    |       |                 |        |                 |   |
|----|-------------|---|---------------------------|----|-------|-----------------|--------|-----------------|---|
| SE | FAM107B     | - | chr10:14553321-14553387   | NA | 0.202 | 0.01165258035   | -0.092 |                 | 1 |
| SE | PPP6R2      | + | chr22:50436987-50437068   | NA | 0.202 | 0.0006841654985 | -0.039 | 0.8502105905    |   |
| SE | CMC2        | - | chr16:81001247-81001334   | NA | 0.202 | 0               | 0.046  | 0.05756834268   |   |
| SE | NEDD1       | + | chr12:96924832-96924942   | NA | 0.202 | 0.001854735332  | 0.021  |                 | 1 |
| SE | SVIL        | - | chr10:29526960-29527056   | NA | 0.202 | 7.64E-06        | 0.097  |                 | 1 |
| SE | SVIL        | - | chr10:29535988-29536069   | NA | 0.202 | 0.04292658489   | 0.007  |                 | 1 |
| SE | METTL4      | - | chr18:2544194-2544286     | NA | 0.201 | 1.41E-06        | 0.014  |                 | 1 |
| SE | SLC29A1     | + | chr6:44226060-44226167    | NA | 0.201 | 0.01275158129   | -0.013 |                 | 1 |
| SE | SENP5       | + | chr3:196927795-196927879  | NA | 0.201 | 0.003991670538  | -0.019 | 0.1202433306    |   |
| SE | SH3GLB2     | - | chr9:129010669-129010693  | NA | 0.201 | 6.34E-07        | 0      |                 | 1 |
| SE | FEZ2        | - | chr2:36560784-36560865    | NA | 0.201 | 0.0002096174479 | 0.001  |                 | 1 |
| SE | THAP9-AS1   | - | chr4:82897988-82898062    | NA | 0.201 | 0.03668129886   | 0.036  |                 | 1 |
| SE | WDR54       | + | chr2:74422119-74422375    | NA | 0.2   | 0.04089304347   | 0.058  | 0.04076956037   |   |
| SE | RBM27       | + | chr5:146251710-146251875  | NA | 0.2   | 0.003498229501  | 0.002  |                 | 1 |
| SE | POLG        | - | chr15:89317938-89318037   | NA | 0.2   | 0               | 0.047  | 5.09E-06        |   |
| SE | ATP9B       | + | chr18:79375393-79375426   | NA | 0.2   | 0.0001362768567 | 0.16   | 8.67E-11        |   |
| SE | TMEM45A     | + | chr3:100519461-100519608  | NA | 0.2   | 0.004619682531  | -0.007 |                 | 1 |
| SE | MYO19       | - | chr17:36501851-36501961   | NA | 0.2   | 5.91E-07        | 0.219  | 2.54E-11        |   |
| SE | HMMR        | + | chr5:163467703-163467748  | NA | 0.199 | 1.66E-09        | -0.062 |                 | 1 |
| SE | SH3D19      | - | chr4:151144219-151144288  | NA | 0.199 | 0.0001322429857 | 0.029  |                 | 1 |
| SE | RWDD1       | + | chr6:116574057-116574171  | NA | 0.198 | 4.92E-07        | -0.009 |                 | 1 |
| SE | CHEK1       | + | chr11:125637448-125637544 | NA | 0.198 | 8.61E-13        | -0.006 |                 | 1 |
| SE | LIN9        | - | chr1:226295841-226295946  | NA | 0.198 | 0.001604315093  | -0.081 |                 | 1 |
| SE | RP5-1021I2I | + | chr14:73922065-73922206   | NA | 0.198 | 0.001649349498  | 0.036  | 0.02743546281   |   |
| SE | CTD-2583A'  | + | chr19:57820493-57820549   | NA | 0.198 | 0.004759894371  | -0.022 |                 | 1 |
| SE | MEF2BNB-M   | - | chr19:19180685-19180761   | NA | 0.197 | 0.001347769055  | -0.012 | 0.1330025421    |   |
| SE | CCDC91      | + | chr12:28225794-28225861   | NA | 0.197 | 0.02611709641   | 0.029  |                 | 1 |
| SE | AGTPBP1     | - | chr9:85678334-85678398    | NA | 0.197 | 3.06E-06        | -0.026 | 0.07907275112   |   |
| SE | GOLGA2      | - | chr9:128272784-128272865  | NA | 0.197 | 0.04068278322   | -0.099 | 0.002359423705  |   |
| SE | SHMT1       | - | chr17:18335558-18335675   | NA | 0.197 | 0.0005294509158 | -0.031 | 0.4412670492    |   |
| SE | GGCX        | - | chr2:85552415-85552567    | NA | 0.196 | 1.86E-06        | -0.03  | 3.43E-05        |   |
| SE | ZNF384      | - | chr12:6678662-6678710     | NA | 0.196 | 0.0003506228985 | -0.062 | 1.87E-05        |   |
| SE | CSNK1D      | - | chr17:82249697-82250179   | NA | 0.196 | 0               | 0.014  | 0               |   |
| SE | MTX1        | + | chr1:155212126-155212219  | NA | 0.196 | 0               | -0.035 | 0               |   |
| SE | HSPA14      | + | chr10:14851218-14851323   | NA | 0.196 | 2.58E-09        | -0.005 |                 | 1 |
| SE | EIF3E       | - | chr8:108242111-108242346  | NA | 0.195 | 0.0001580415189 | -0.046 |                 | 1 |
| SE | PARP6       | - | chr15:72250844-72250957   | NA | 0.195 | 0.002626254247  | 0.04   | 0.6378306673    |   |
| SE | EIF4A2      | + | chr3:186788309-186788416  | NA | 0.195 | 0.0009928791088 | -0.01  | 0.5902580187    |   |
| SE | AMACR       | - | chr5:34004573-34004734    | NA | 0.195 | 0.0008221747762 | -0.039 |                 | 1 |
| SE | CDKL3       | - | chr5:134359896-134360091  | NA | 0.194 | 0.03199306257   | -0.036 |                 | 1 |
| SE | ACIN1       | - | chr14:23071124-23071186   | NA | 0.194 | 0.04533534914   | -0.069 | 0.04489001631   |   |
| SE | COA1        | - | chr7:43656032-43656153    | NA | 0.194 | 8.02E-05        | -0.021 |                 | 1 |
| SE | ATAD5       | + | chr17:30879422-30879487   | NA | 0.194 | 1.38E-05        | 0.002  |                 | 1 |
| SE | SLC35A3     | + | chr1:99999260-99999415    | NA | 0.193 | 0.02279519203   | -0.025 |                 | 1 |
| SE | TBC1D8B     | + | chrX:106839307-106839457  | NA | 0.193 | 0.0002577584141 | -0.047 |                 | 1 |
| SE | INIP        | - | chr9:112689526-112689617  | NA | 0.193 | 0.0008535483712 | -0.011 |                 | 1 |
| SE | NUDT2       | + | chr9:34336228-34336341    | NA | 0.193 | 0               | -0.036 | 0.9487342534    |   |
| SE | TARBP1      | - | chr1:234400852-234400948  | NA | 0.192 | 0.03775197242   | 0.105  | 0.0002920998039 |   |
| SE | RECQL5      | - | chr17:75650516-75650718   | NA | 0.192 | 4.71E-05        | -0.019 |                 | 1 |
| SE | BAI2        | - | chr1:31736572-31736723    | NA | 0.192 | 0.005745634186  | -0.003 |                 | 1 |
| SE | MDC1        | - | chr6:30707565-30708357    | NA | 0.192 | 0.0001681652016 | 0.026  |                 | 1 |
| SE | HDHD2       | - | chr18:47137234-47137338   | NA | 0.192 | 0.0001146885166 | 0.037  | 1.49E-13        |   |
| SE | MFF         | + | chr2:227342744-227342819  | NA | 0.192 | 0.000146113945  | -0.006 |                 | 1 |
| SE | MYO9A       | - | chr15:71902940-71903063   | NA | 0.191 | 0.0001969559049 | -0.004 |                 | 1 |
| SE | SMARCC2     | - | chr12:56172936-56173029   | NA | 0.191 | 2.01E-05        | 0.102  | 7.48E-05        |   |
| SE | FAM219B     | - | chr15:74904981-74905039   | NA | 0.191 | 0.0003588759518 | -0.005 |                 | 1 |
| SE | GPBP1       | + | chr5:57237112-57237172    | NA | 0.19  | 1.14E-08        | 0.025  |                 | 1 |
| SE | UBE2W       | - | chr8:73870268-73870301    | NA | 0.19  | 4.28E-08        | 0.026  |                 | 1 |
| SE | P4HA1       | - | chr10:73044980-73045051   | NA | 0.19  | 3.13E-05        | -0.015 | 0.02562999478   |   |
| SE | PDCD2L      | + | chr19:34404648-34404990   | NA | 0.19  | 0.01204751673   | -0.054 | 0               |   |
| SE | AGAP3       | + | chr7:151120519-151120745  | NA | 0.19  | 0.01944727044   | 0.083  | 0.0009914770566 |   |
| SE | NSUN2       | - | chr5:6631872-6631977      | NA | 0.189 | 1.23E-10        | 0.006  |                 | 1 |
| SE | SEC61A2     | + | chr10:12155777-12155931   | NA | 0.189 | 0.02675707532   | 0.047  | 9.76E-05        |   |

|    |          |   |                           |    |       |                 |        |                |
|----|----------|---|---------------------------|----|-------|-----------------|--------|----------------|
| SE | NBN      | - | chr8:89981952-89982002    | NA | 0.189 | 2.01E-05        | -0.034 | 1              |
| SE | DMPK     | - | chr19:45780322-45780381   | NA | 0.189 | 0.001052296447  | 0.015  | 1              |
| SE | CLTC     | + | chr17:59687000-59687021   | NA | 0.189 | 0               | 0.154  | 0              |
| SE | DCAF8    | - | chr1:160261284-160261358  | NA | 0.188 | 9.23E-05        | 0.008  | 1              |
| SE | GUSB     | - | chr7:65974918-65975071    | NA | 0.188 | 1.27E-05        | -0.042 | 0.06188305526  |
| SE | PAAF1    | + | chr11:73887030-73887099   | NA | 0.188 | 4.40E-11        | 0.124  | 3.37E-05       |
| SE | SLC25A42 | + | chr19:19104912-19104938   | NA | 0.188 | 0.00274477048   | -0.001 | 1              |
| SE | CCDC125  | - | chr5:69294792-69294900    | NA | 0.188 | 0.004507877005  | 0.003  | 1              |
| SE | NBPF1    | - | chr1:16594930-16595009    | NA | 0.188 | 0.02406623634   | -0.028 | 1              |
| SE | SPAG9    | - | chr17:50975862-50975901   | NA | 0.187 | 8.78E-05        | 0      | 1              |
| SE | TTC23    | - | chr15:99245388-99245510   | NA | 0.187 | 0.03499961163   | 0.008  | 1              |
| SE | GUK1     | + | chr1:228148370-228148539  | NA | 0.187 | 1.39E-05        | -0.011 | 1              |
| SE | AP2A2    | + | chr11:1000431-1000598     | NA | 0.186 | 0.02196082209   | -0.027 | 2.03E-07       |
| SE | SPTAN1   | + | chr9:128627924-128627942  | NA | 0.186 | 0               | 0.018  | 0              |
| SE | NOL8     | - | chr9:92311145-92311259    | NA | 0.186 | 1.93E-09        | -0.008 | 1              |
| SE | UFD1L    | - | chr22:19475495-19475602   | NA | 0.185 | 0.0002027578632 | 0.059  | 7.80E-13       |
| SE | ZFYVE21  | + | chr14:103729792-103729846 | NA | 0.185 | 0.001742917457  | 0.166  | 0              |
| SE | ZC2HC1A  | + | chr8:78711989-78712106    | NA | 0.185 | 0.0001857822036 | -0.015 | 1              |
| SE | NADK2    | - | chr5:36208624-36208690    | NA | 0.185 | 1.16E-07        | 0.002  | 1              |
| SE | ARHGAP23 | + | chr17:38498413-38498510   | NA | 0.185 | 0.03589513837   | 0.007  | 1              |
| SE | MTMR11   | - | chr1:149931259-149931426  | NA | 0.184 | 0.0223742272    | -0.001 | 1              |
| SE | FAT1     | - | chr4:186590367-186590403  | NA | 0.184 | 8.32E-08        | -0.05  | 0.005454289519 |
| SE | MRPL55   | - | chr1:228108436-228108474  | NA | 0.184 | 0.03254129005   | -0.044 | 0.03034242192  |
| SE | FRS2     | + | chr12:69486201-69486297   | NA | 0.184 | 0.005841165759  | -0.025 | 1              |
| SE | C17orf62 | - | chr17:82447579-82447621   | NA | 0.184 | 0.006498475566  | -0.028 | 2.15E-11       |
| SE | HAGH     | - | chr16:1819114-1819223     | NA | 0.183 | 2.21E-10        | 0.007  | 1              |
| SE | VTI1B    | - | chr14:67663028-67663190   | NA | 0.183 | 1.67E-10        | -0.004 | 0.5757117115   |
| SE | SAP30BP  | + | chr17:75671815-75671863   | NA | 0.183 | 0               | -0.003 | 0.05352239286  |
| SE | SDCCAG3  | - | chr9:136408998-136409067  | NA | 0.183 | 0.0474914878    | 0.018  | 1              |
| SE | CAMK2G   | - | chr10:73819531-73819645   | NA | 0.182 | 2.25E-06        | 0.011  | 1              |
| SE | KMT2D    | - | chr12:49024052-49024100   | NA | 0.182 | 5.73E-08        | -0.019 | 0.05994834723  |
| SE | ADCY6    | - | chr12:48773939-48774098   | NA | 0.182 | 0.001421550924  | -0.002 | 1              |
| SE | INTS6    | - | chr13:51423029-51423090   | NA | 0.181 | 0.04127709796   | 0.066  | 1              |
| SE | GTPBP10  | + | chr7:90355085-90355230    | NA | 0.181 | 9.97E-05        | -0.019 | 1              |
| SE | SCAMP3   | - | chr1:155261656-155261734  | NA | 0.181 | 2.09E-06        | -0.03  | 0.002395562845 |
| SE | OSBPL3   | - | chr7:24863199-24863292    | NA | 0.18  | 0.0004067926128 | 0.012  | 1              |
| SE | DDHD1    | - | chr14:53093315-53093444   | NA | 0.18  | 0.01034250695   | 0.017  | 1              |
| SE | PARP6    | - | chr15:72250844-72250954   | NA | 0.18  | 0.000680065943  | 0.036  | 0.6407210674   |
| SE | DEF8     | + | chr16:89952561-89952682   | NA | 0.18  | 0.00897994775   | 0.002  | 1              |
| SE | PLOD2    | - | chr3:146077861-146077924  | NA | 0.18  | 0.007990153349  | 0.008  | 1              |
| SE | RHOC     | - | chr1:112705099-112705201  | NA | 0.18  | 0.002921158496  | -0.027 | 0.5802092128   |
| SE | AGAP1    | + | chr2:235750353-235750488  | NA | 0.18  | 3.67E-06        | -0.012 | 1              |
| SE | FAM189B  | - | chr1:155250275-155250929  | NA | 0.18  | 0.001414702212  | -0.003 | 1              |
| SE | NLE1     | - | chr17:35134942-35135059   | NA | 0.179 | 0.002462945607  | -0.009 | 1              |
| SE | WHSC1    | + | chr4:1942338-1942432      | NA | 0.179 | 7.24E-05        | 0.058  | 0.409967346    |
| SE | VEGFA    | + | chr6:43781955-43782052    | NA | 0.179 | 0.000117787783  | 0.089  | 1.24E-07       |
| SE | CCDC18   | + | chr1:93183359-93183495    | NA | 0.179 | 0.01918166239   | 0.017  | 1              |
| SE | ERMARD   | + | chr6:169753286-169753372  | NA | 0.179 | 0.03259045842   | 0.024  | 1              |
| SE | IL11RA   | + | chr9:34660803-34660936    | NA | 0.179 | 0.00233625466   | -0.016 | 1              |
| SE | THAP9    | + | chr4:82905860-82905926    | NA | 0.179 | 0.003447264686  | 0.044  | 1              |
| SE | MBTD1    | - | chr17:51202021-51202077   | NA | 0.178 | 0.008345359488  | 0.03   | 1              |
| SE | IFNGR2   | + | chr21:33410840-33410892   | NA | 0.178 | 0.000258114977  | 0.001  | 1              |
| SE | TMEM230  | - | chr20:5111499-5111605     | NA | 0.177 | 0.0001350148226 | 0.016  | 1              |
| SE | CRBN     | - | chr3:3153959-3154075      | NA | 0.177 | 2.26E-06        | 0.003  | 1              |
| SE | LMBR1L   | - | chr12:49106653-49106746   | NA | 0.177 | 4.77E-07        | 0.001  | 1              |
| SE | DEF8     | + | chr16:89952557-89952682   | NA | 0.177 | 0.009482340098  | 0.001  | 1              |
| SE | FAM131A  | + | chr3:184337310-184337371  | NA | 0.177 | 0.001823831485  | -0.016 | 1              |
| SE | CEBPZOS  | + | chr2:37198493-37198672    | NA | 0.177 | 0.02655662668   | 0.047  | 1              |
| SE | FHL1     | + | chrX:136209242-136209442  | NA | 0.176 | 0               | 0.011  | 0.7426068118   |
| SE | ZCCHC8   | - | chr12:122490461-122490567 | NA | 0.176 | 1.79E-06        | 0.002  | 1              |
| SE | CHD9     | + | chr16:53319812-53319951   | NA | 0.176 | 0.01436473974   | 0.001  | 0.1433774672   |
| SE | SSH1     | - | chr12:108802321-108802368 | NA | 0.175 | 0.0250286001    | 0.026  | 1              |
| SE | HARS2    | + | chr5:140696102-140696201  | NA | 0.175 | 1.39E-10        | -0.023 | 1              |



|    |           |   |                           |    |       |                 |        |                 |
|----|-----------|---|---------------------------|----|-------|-----------------|--------|-----------------|
| SE | PFDN5     | + | chr12:53296429-53296551   | NA | 0.175 | 7.32E-07        | 0.05   | 2.75E-11        |
| SE | VPS13B    | + | chr8:99507136-99507203    | NA | 0.175 | 0.01780311254   | -0.044 | 1               |
| SE | LMBR1L    | - | chr12:49106544-49106746   | NA | 0.175 | 0.02376495083   | -0.001 | 1               |
| SE | C16orf13  | - | chr16:634888-635063       | NA | 0.174 | 0.001291710649  | 0.003  | 1               |
| SE | TBC1D32   | - | chr6:121255327-121255410  | NA | 0.174 | 0.0009385159804 | 0.026  | 1               |
| SE | IFNGR2    | + | chr21:33410835-33410892   | NA | 0.174 | 0.0005294509158 | -0.002 | 1               |
| SE | SLC4A1AP  | + | chr2:27688699-27688767    | NA | 0.174 | 0.01068668249   | -0.002 | 1               |
| SE | BPTF      | + | chr17:67875555-67875744   | NA | 0.174 | 2.33E-06        | -0.001 | 1               |
| SE | ARNTL2    | + | chr12:27370128-27370230   | NA | 0.173 | 0.0002979307257 | -0.057 | 1               |
| SE | C17orf53  | + | chr17:44150960-44151044   | NA | 0.173 | 0.03360945903   | -0.057 | 1               |
| SE | TSEN2     | + | chr3:12516610-12516661    | NA | 0.173 | 0.007851399504  | -0.013 | 1               |
| SE | ZNF326    | + | chr1:90007611-90007750    | NA | 0.173 | 5.06E-06        | 0.006  | 1               |
| SE | PAAF1     | + | chr11:73886928-73887099   | NA | 0.173 | 2.20E-10        | 0.127  | 8.56E-07        |
| SE | SNHG14    | + | chr15:25111764-25111894   | NA | 0.173 | 0.02967749663   | 0.001  | 1               |
| SE | SDCCAG8   | + | chr1:243293398-243293494  | NA | 0.172 | 0.007959369707  | -0.02  | 1               |
| SE | MTMR2     | - | chr11:95887611-95887684   | NA | 0.172 | 6.89E-05        | 0.007  | 1               |
| SE | ABCD4     | - | chr14:74288206-74288259   | NA | 0.172 | 0.01087266728   | -0.013 | 0.08165659186   |
| SE | PDLIM5    | + | chr4:94584985-94585003    | NA | 0.172 | 2.58E-07        | 0.076  | 0.0002059159903 |
| SE | GAPVD1    | + | chr9:125342218-125342299  | NA | 0.172 | 1.64E-10        | -0.019 | 0.02188844353   |
| SE | STRA13    | - | chr17:82019509-82019694   | NA | 0.172 | 0.002280843257  | -0.006 | 1               |
| SE | AK2       | - | chr1:33031543-33031661    | NA | 0.171 | 0               | 0.032  | 5.97E-11        |
| SE | MADD      | + | chr11:47326737-47326807   | NA | 0.171 | 2.26E-05        | -0.034 | 0.2160637101    |
| SE | CCHCR1    | - | chr6:31157357-31157500    | NA | 0.171 | 0.01760896452   | 0.057  | 1               |
| SE | RRP12     | - | chr10:97424800-97424893   | NA | 0.17  | 0.02624280943   | -0.113 | 1               |
| SE | PHF14     | + | chr7:11061790-11061841    | NA | 0.17  | 0               | -0.002 | 1               |
| SE | CLK4      | - | chr5:178619837-178619896  | NA | 0.17  | 0.0004320131833 | -0.003 | 1               |
| SE | TIAL1     | - | chr10:119580470-119580538 | NA | 0.17  | 0.02493720771   | 0.022  | 2.51E-05        |
| SE | C20orf194 | - | chr20:3343675-3343731     | NA | 0.169 | 0.0087482388    | -0.019 | 1               |
| SE | PCBP4     | - | chr3:51962809-51962892    | NA | 0.169 | 0.01989487174   | 0.022  | 1               |
| SE | ATP6V0B   | + | chr1:43975664-43975848    | NA | 0.169 | 0.01015259463   | -0.014 | 1               |
| SE | CITED1    | - | chrX:72305301-72305422    | NA | 0.169 | 0.00029790281   | -0.027 | 1               |
| SE | ARHGEF39  | - | chr9:35662945-35663074    | NA | 0.169 | 0.001596040472  | 0.061  | 1               |
| SE | ARHGEF40  | + | chr14:21075644-21075765   | NA | 0.169 | 0.000780430881  | -0.022 | 1               |
| SE | PER3      | + | chr1:7787197-7787246      | NA | 0.168 | 0.00357297092   | 0.016  | 1               |
| SE | DGUOK     | + | chr2:73950600-73950732    | NA | 0.168 | 0.0001134949235 | 0.148  | 0               |
| SE | CDCA7     | + | chr2:173359254-173359491  | NA | 0.168 | 1.93E-05        | 0.121  | 1.81E-06        |
| SE | RHOT1     | + | chr17:32172936-32173060   | NA | 0.167 | 0.02106816711   | -0.006 | 1               |
| SE | SYVN1     | - | chr11:65132247-65132308   | NA | 0.167 | 0.009427282182  | -0.005 | 1               |
| SE | OMA1      | - | chr1:58530600-58530729    | NA | 0.167 | 3.05E-06        | -0.014 | 1               |
| SE | PTK2      | - | chr8:140803542-140803650  | NA | 0.167 | 0               | -0.004 | 1               |
| SE | MPHOSPH8  | - | chr12:123162114-123162218 | NA | 0.166 | 1.93E-05        | -0.001 | 1               |
| SE | MAEA      | + | chr4:1322380-1322503      | NA | 0.166 | 6.91E-05        | -0.034 | 1               |
| SE | VRK3      | - | chr19:50009235-50009385   | NA | 0.166 | 0.003445306513  | -0.041 | 3.53E-10        |
| SE | COA1      | - | chr7:43656032-43656153    | NA | 0.166 | 6.41E-13        | 0.001  | 1               |
| SE | HMGS1     | - | chr5:43307765-43307824    | NA | 0.166 | 5.14E-13        | 0.015  | 1               |
| SE | SLC25A36  | + | chr3:140966999-140967036  | NA | 0.166 | 0.01612752722   | -0.01  | 1               |
| SE | C11orf1   | + | chr11:111883135-111883202 | NA | 0.166 | 0.0003246175549 | 0.001  | 0.8240834163    |
| SE | RPL13A    | + | chr19:49489849-49489912   | NA | 0.166 | 9.38E-05        | 0      | 1               |
| SE | FNBP4     | - | chr11:47725736-47725836   | NA | 0.165 | 9.68E-05        | 0.032  | 1               |
| SE | PKP4      | + | chr2:158676738-158676867  | NA | 0.165 | 3.10E-06        | 0.163  | 5.75E-13        |
| SE | MFF       | + | chr2:227352513-227352573  | NA | 0.165 | 1.13E-05        | 0.006  | 0.2366737735    |
| SE | ZNF440    | + | chr19:11830282-11830409   | NA | 0.165 | 0.02119091855   | 0      | 1               |
| SE | CCNE1     | + | chr19:29821995-29822130   | NA | 0.164 | 1.69E-05        | -0.021 | 1               |
| SE | FTSJ2     | - | chr7:2238014-2238937      | NA | 0.164 | 0.008753276415  | 0.012  | 1               |
| SE | SIN3B     | + | chr19:16862883-16862979   | NA | 0.164 | 0.008586619979  | 0.047  | 0.02216388922   |
| SE | SUN1      | + | chr7:832504-832601        | NA | 0.164 | 4.30E-07        | -0.017 | 0.01627928816   |
| SE | R3HDM4    | - | chr19:901419-901546       | NA | 0.164 | 0.009304957146  | 0.002  | 1               |
| SE | AP2B1     | + | chr17:35670856-35670898   | NA | 0.163 | 8.61E-05        | 0.07   | 0.0001450373156 |
| SE | GTPBP10   | + | chr7:90354457-90354549    | NA | 0.163 | 0.001003586949  | -0.022 | 1               |
| SE | PRPF4B    | + | chr6:4062556-4062760      | NA | 0.163 | 0.0001935444919 | 0.029  | 1               |
| SE | CEP78     | + | chr9:78246668-78246782    | NA | 0.163 | 1.69E-10        | -0.012 | 1               |
| SE | SLC7A11   | - | chr4:138223198-138223324  | NA | 0.163 | 0.0001997450176 | 0.005  | 1               |
| SE | RNMT      | + | chr18:13759941-13760208   | NA | 0.162 | 0.0004093805217 | -0.005 | 1               |

|    |            |   |                           |    |       |                 |        |                 |
|----|------------|---|---------------------------|----|-------|-----------------|--------|-----------------|
| SE | ARHGEF7    | + | chr13:111288353-111288443 | NA | 0.162 | 8.37E-06        | -0.007 | 0.1515690427    |
| SE | PPP1R12C   | - | chr19:55096261-55096335   | NA | 0.162 | 3.49E-05        | -0.008 | 1               |
| SE | RIN2       | + | chr20:19964951-19965024   | NA | 0.162 | 0.001397451056  | -0.028 | 1               |
| SE | EMC10      | + | chr19:50481860-50481947   | NA | 0.162 | 0               | -0.031 | 5.89E-05        |
| SE | ZNF444     | + | chr19:56142275-56142386   | NA | 0.162 | 0.02259035035   | -0.018 | 1               |
| SE | ARRB1      | - | chr11:75271700-75271724   | NA | 0.161 | 0.005673378401  | 0.123  | 0.0005740650471 |
| SE | SMARCAL1   | + | chr2:216438419-216438485  | NA | 0.161 | 0.0002091071405 | -0.004 | 1               |
| SE | ETNK2      | - | chr1:204134514-204134694  | NA | 0.161 | 0.03472346189   | -0.015 | 1               |
| SE | TBC1D32    | - | chr6:121299445-121299505  | NA | 0.161 | 0.0005716012452 | -0.032 | 1               |
| SE | SNHG11     | + | chr20:38447929-38448093   | NA | 0.161 | 0.02738999534   | 0.021  | 1               |
| SE | CCDC92     | - | chr12:123944271-123944364 | NA | 0.16  | 0.008185219315  | -0.015 | 1               |
| SE | PAK4       | + | chr19:39168229-39168302   | NA | 0.16  | 0.0002900265419 | -0.012 | 1               |
| SE | SETD5      | + | chr3:9429826-9430051      | NA | 0.16  | 0.0119410651    | 0.067  | 0.06221824574   |
| SE | PXMP2      | + | chr12:132695883-132696046 | NA | 0.16  | 0.03033077178   | -0.005 | 0.4102931695    |
| SE | RP11-319G6 | + | chr3:139419556-139419680  | NA | 0.16  | 0.0005716012452 | 0.038  | 1               |
| SE | ACO1       | + | chr9:32386370-32386438    | NA | 0.159 | 9.98E-07        | -0.029 | 0.1239584912    |
| SE | RMND1      | - | chr6:151422540-151422605  | NA | 0.159 | 5.32E-05        | -0.006 | 1               |
| SE | TAPT1      | - | chr4:16170652-16170729    | NA | 0.159 | 0.01024382028   | -0.007 | 1               |
| SE | NQO2       | + | chr6:3015529-3015643      | NA | 0.158 | 0.01432424694   | -0.05  | 1.17E-06        |
| SE | TBC1D9B    | - | chr5:179867444-179867495  | NA | 0.158 | 0               | 0.124  | 0               |
| SE | GABBR1     | - | chr6:29627485-29627646    | NA | 0.158 | 0.0415224856    | 0.002  | 1               |
| SE | PPP2R3C    | - | chr14:35109818-35109847   | NA | 0.157 | 0.01371870462   | -0.007 | 1               |
| SE | RSRC2      | - | chr12:122520503-122520581 | NA | 0.157 | 0.000549099964  | -0.043 | 1               |
| SE | TOM1L1     | + | chr17:54905488-54905567   | NA | 0.157 | 8.32E-05        | 0.03   | 1               |
| SE | LSM14B     | + | chr20:62127584-62127701   | NA | 0.157 | 0.008345604047  | -0.009 | 1               |
| SE | HIVEP2     | - | chr6:142769551-142775125  | NA | 0.156 | 0.0007818481423 | -0.013 | 1               |
| SE | PIBF1      | + | chr13:72783422-72783721   | NA | 0.156 | 9.12E-07        | -0.027 | 1               |
| SE | HNRNPL     | - | chr19:38841612-38841682   | NA | 0.156 | 0.03764037285   | 0.002  | 1               |
| SE | MRPL18     | + | chr6:159790667-159790787  | NA | 0.156 | 7.43E-06        | 0.015  | 0.02825197921   |
| SE | PPOX       | + | chr1:161167370-161167486  | NA | 0.156 | 0.04131087203   | 0      | 1               |
| SE | IMMP1L     | - | chr11:31456259-31456386   | NA | 0.156 | 0.03497307275   | 0.01   | 1               |
| SE | SH3YL1     | - | chr2:260084-260702        | NA | 0.155 | 0.0307508689    | -0.021 | 1               |
| SE | FERMT2     | - | chr14:52861013-52861034   | NA | 0.155 | 0               | 0.071  | 2.63E-07        |
| SE | ZFAND6     | + | chr15:80073265-80073330   | NA | 0.155 | 0.0006650621728 | 0.008  | 0.3473770622    |
| SE | GPATCH2    | - | chr1:217495014-217495075  | NA | 0.155 | 0.01558075653   | -0.004 | 1               |
| SE | POLA1      | + | chrX:24725980-24726055    | NA | 0.155 | 6.82E-06        | -0.007 | 1               |
| SE | RALGPS1    | + | chr9:126977694-126977745  | NA | 0.155 | 0.00469384981   | -0.008 | 1               |
| SE | UGP2       | + | chr2:63842538-63842599    | NA | 0.155 | 1.39E-05        | 0.078  | 0.002278911379  |
| SE | UPP1       | + | chr7:48103296-48103411    | NA | 0.155 | 0.001796423469  | -0.003 | 1               |
| SE | PORCN      | + | chrX:48512834-48512852    | NA | 0.154 | 0.04729117939   | 0.075  | 0.0009153999046 |
| SE | SSX2IP     | - | chr1:84671188-84671308    | NA | 0.154 | 0.02654969046   | 0.046  | 1               |
| SE | RBM39      | - | chr20:35740524-35740597   | NA | 0.154 | 0.003153225159  | 0.01   | 1               |
| SE | DCTD       | - | chr4:182916418-182916539  | NA | 0.153 | 0.0464612947    | 0.01   | 1               |
| SE | IFT88      | + | chr13:20631015-20631102   | NA | 0.152 | 0.002607315509  | 0.001  | 1               |
| SE | NQO2       | + | chr6:3002049-3002286      | NA | 0.152 | 0.01579734626   | -0.018 | 1               |
| SE | TMEM87B    | + | chr2:112074911-112074962  | NA | 0.152 | 0.004874200486  | -0.014 | 1               |
| SE | MTA1       | + | chr14:105445666-105445852 | NA | 0.152 | 9.06E-08        | 0.003  | 1               |
| SE | FAM134C    | - | chr17:42587833-42587864   | NA | 0.151 | 0.002611775813  | 0.03   | 1               |
| SE | SNHG6      | - | chr8:66922613-66922725    | NA | 0.151 | 0               | 0.023  | 0               |
| SE | VPRBP      | - | chr3:51466805-51466876    | NA | 0.15  | 0.03019391919   | 0.006  | 1               |
| SE | BPTF       | + | chr17:67886127-67886316   | NA | 0.15  | 0.0001037401653 | 0.011  | 1               |
| SE | FAM192A    | - | chr16:57178501-57178852   | NA | 0.15  | 0.01213319028   | -0.007 | 1               |
| SE | TARBP1     | - | chr1:234427316-234427388  | NA | 0.149 | 2.67E-05        | 0.034  | 0.01321933004   |
| SE | DOCK9      | - | chr13:98825871-98825940   | NA | 0.149 | 0.04570926204   | -0.013 | 1               |
| SE | EFCAB14    | - | chr1:46688352-46688544    | NA | 0.149 | 0.01675843214   | 0.07   | 0.00251862826   |
| SE | JMJD1C     | - | chr10:63215552-63215617   | NA | 0.149 | 0.0001826002476 | -0.01  | 1               |
| SE | WDR27      | - | chr6:169664165-169664286  | NA | 0.149 | 0.02319335102   | -0.024 | 1               |
| SE | DNM3       | + | chr1:172093695-172093725  | NA | 0.149 | 0.001174848614  | -0.025 | 1               |
| SE | WAC-AS1    | - | chr10:28525947-28526008   | NA | 0.149 | 0.001169338867  | 0.026  | 1               |
| SE | ZNF561-AS1 | + | chr19:9627715-9627806     | NA | 0.149 | 0.02302160623   | 0.061  | 0.6809108068    |
| SE | BBX        | + | chr3:107789786-107789876  | NA | 0.148 | 0.03881092694   | -0.046 | 1               |
| SE | SLC23A2    | - | chr20:4885820-4885909     | NA | 0.147 | 0.01214445282   | -0.012 | 0.02707584673   |
| SE | CCAR2      | + | chr8:22613016-22613136    | NA | 0.147 | 8.25E-14        | -0.001 | 1               |

|    |           |   |                           |    |       |                 |        |                 |   |
|----|-----------|---|---------------------------|----|-------|-----------------|--------|-----------------|---|
| SE | PSMG4     | + | chr6:3264173-3264325      | NA | 0.147 | 2.71E-09        | 0.002  |                 | 1 |
| SE | NBPF1     | - | chr1:16594930-16595013    | NA | 0.147 | 0.04422144556   | -0.017 |                 | 1 |
| SE | ZDHHC6    | - | chr10:112440533-112440695 | NA | 0.146 | 2.19E-06        | -0.016 |                 | 1 |
| SE | PEX3      | + | chr6:143472159-143472328  | NA | 0.146 | 1.34E-05        | -0.011 |                 | 1 |
| SE | POLB      | + | chr8:42352518-42352568    | NA | 0.146 | 0.0001215527779 | -0.026 | 5.91E-10        |   |
| SE | COL4A3BP  | - | chr5:75399309-75399387    | NA | 0.146 | 2.38E-05        | 0.121  | 3.64E-06        |   |
| SE | NGLY1     | - | chr3:25732318-25732483    | NA | 0.146 | 2.13E-09        | 0.044  | 4.43E-13        |   |
| SE | ACSS1     | - | chr20:25015137-25015230   | NA | 0.146 | 0.02664983959   | 0.001  |                 | 1 |
| SE | ALG13     | + | chrX:111721602-111721711  | NA | 0.145 | 6.15E-05        | -0.015 |                 | 1 |
| SE | BCL2L12   | + | chr19:49667021-49667161   | NA | 0.145 | 0.02383511682   | -0.028 |                 | 1 |
| SE | MFF       | + | chr2:227352513-227352573  | NA | 0.145 | 5.60E-06        | 0.005  |                 | 1 |
| SE | N4BP2L2   | - | chr13:32538617-32538684   | NA | 0.145 | 3.80E-06        | 0.009  |                 | 1 |
| SE | TNFRSF12A | + | chr16:3021188-3021319     | NA | 0.144 | 0.001101883147  | 0.002  |                 | 1 |
| SE | TFIP11    | - | chr22:26511118-26511195   | NA | 0.144 | 0.04611867135   | 0.012  |                 | 1 |
| SE | LPHN2     | + | chr1:81987259-81987341    | NA | 0.144 | 0.0439700115    | -0.032 | 0.5058044519    |   |
| SE | KTN1      | + | chr14:55673171-55673255   | NA | 0.144 | 0.0006166132953 | -0.105 |                 | 0 |
| SE | MLLT10    | + | chr10:21557620-21557824   | NA | 0.143 | 0.00041663617   | 0.095  |                 | 1 |
| SE | SLC35C2   | - | chr20:46355801-46355874   | NA | 0.143 | 6.22E-08        | -0.003 |                 | 1 |
| SE | NENF      | + | chr1:212442545-212442625  | NA | 0.143 | 9.57E-05        | -0.028 | 0.0001670778283 |   |
| SE | SLC35B3   | - | chr6:8419579-8419677      | NA | 0.143 | 0.001346225949  | -0.018 |                 | 1 |
| SE | ARPP19    | - | chr15:52568847-52568900   | NA | 0.143 | 0.0007495632856 | -0.003 |                 | 1 |
| SE | SSBP4     | + | chr19:18425908-18426083   | NA | 0.143 | 0.01287323078   | 0.001  |                 | 1 |
| SE | TMBIM6    | + | chr12:49742437-49742607   | NA | 0.143 | 0.009482340098  | 0.01   |                 | 1 |
| SE | TSC1      | - | chr9:132921362-132921436  | NA | 0.143 | 0.001322173813  | -0.016 |                 | 1 |
| SE | FAM21C    | + | chr10:45751481-45751553   | NA | 0.143 | 1.48E-05        | 0.014  |                 | 1 |
| SE | ZNF195    | - | chr11:3361975-3362032     | NA | 0.142 | 0.01403856436   | 0.037  |                 | 1 |
| SE | ZNF195    | - | chr11:3362545-3362602     | NA | 0.142 | 0.02225064706   | 0.03   |                 | 1 |
| SE | ZBTB25    | - | chr14:64487113-64487196   | NA | 0.142 | 0.007295871206  | -0.04  |                 | 1 |
| SE | UBE2D3    | - | chr4:102825238-102825317  | NA | 0.142 | 0.02414968727   | -0.02  |                 | 1 |
| SE | PRDM5     | - | chr4:120754552-120754638  | NA | 0.142 | 0.03926733927   | -0.01  |                 | 1 |
| SE | MELK      | + | chr9:36594627-36594771    | NA | 0.142 | 0.008988988263  | -0.04  |                 | 1 |
| SE | FAM21A    | + | chr10:50092161-50092233   | NA | 0.141 | 0.002623125021  | -0.012 | 0.09679735232   |   |
| SE | MAPK3     | - | chr16:30117136-30117285   | NA | 0.141 | 1.99E-10        | 0.003  | 0.5815311423    |   |
| SE | SNRNP70   | + | chr19:49102113-49103587   | NA | 0.141 | 0               | 0.033  | 0.8188259869    |   |
| SE | FAM120B   | + | chr6:170358225-170358318  | NA | 0.141 | 0.003756883991  | -0.009 |                 | 1 |
| SE | RCL1      | + | chr9:4833153-4833228      | NA | 0.141 | 8.10E-07        | 0.005  |                 | 1 |
| SE | RECQL     | - | chr12:21501169-21501215   | NA | 0.14  | 0.03400412644   | -0.036 |                 | 1 |
| SE | TARS2     | + | chr1:150504631-150504733  | NA | 0.14  | 0.0001016278257 | -0.038 | 3.19E-11        |   |
| SE | CSNK1G3   | + | chr5:123595038-123595134  | NA | 0.14  | 0.0001322429857 | 0.122  | 2.21E-11        |   |
| SE | EPB41     | + | chr1:29060421-29060484    | NA | 0.14  | 0.006560213909  | 0.007  |                 | 1 |
| SE | GABBR1    | - | chr6:29609228-29609379    | NA | 0.14  | 4.05E-08        | 0.21   | 2.71E-10        |   |
| SE | IFT88     | + | chr13:20589810-20589867   | NA | 0.139 | 0.02953166679   | -0.07  | 0.1152574686    |   |
| SE | RCBTB2    | - | chr13:48524658-48524757   | NA | 0.139 | 0.007914741791  | 0.008  |                 | 1 |
| SE | CPEB2     | + | chr4:15040463-15040487    | NA | 0.139 | 0.002054465018  | 0.148  | 0.01776847332   |   |
| SE | TLK2      | + | chr17:62523133-62523177   | NA | 0.139 | 0.01462858414   | -0.011 |                 | 1 |
| SE | EPB41     | + | chr1:29058810-29058852    | NA | 0.139 | 0.003539628202  | 0.013  |                 | 1 |
| SE | SLC26A6   | - | chr3:48632244-48632396    | NA | 0.139 | 0.004427904581  | -0.034 |                 | 1 |
| SE | MYCBP2    | - | chr13:77103208-77103310   | NA | 0.138 | 0.007740262278  | 0.018  |                 | 1 |
| SE | ARHGEF10  | + | chr8:1926376-1926463      | NA | 0.138 | 1.97E-05        | -0.012 |                 | 1 |
| SE | CRYZ      | - | chr1:74707102-74707204    | NA | 0.138 | 2.18E-05        | -0.015 | 0.02631510705   |   |
| SE | STX16     | + | chr20:58659622-58659634   | NA | 0.138 | 0.0008643964118 | 0.102  | 0.0003486423568 |   |
| SE | CHN1      | - | chr2:174945169-174945261  | NA | 0.138 | 0.009304957146  | 0.005  | 4.23E-06        |   |
| SE | ARFGAP2   | - | chr11:47172280-47172333   | NA | 0.138 | 0.00357102587   | -0.006 |                 | 1 |
| SE | GPX4      | + | chr19:1106180-1106266     | NA | 0.138 | 8.15E-08        | -0.022 | 3.15E-14        |   |
| SE | CTNND1    | + | chr11:57794009-57794081   | NA | 0.138 | 0.04953027008   | 0.01   |                 | 1 |
| SE | PVT1      | + | chr8:128070159-128070272  | NA | 0.138 | 0.003876184563  | -0.004 |                 | 1 |
| SE | CDKL3     | - | chr5:134319357-134319497  | NA | 0.137 | 0.03403990512   | -0.018 | 0.7335603905    |   |
| SE | DTWD1     | + | chr15:49631000-49631058   | NA | 0.137 | 6.02E-06        | -0.013 | 0.7843853241    |   |
| SE | CHAF1A    | + | chr19:4418019-4418076     | NA | 0.137 | 3.24E-08        | -0.023 |                 | 1 |
| SE | EXOSC10   | - | chr1:11080498-11080514    | NA | 0.137 | 0.01358618517   | -0.045 | 7.07E-09        |   |
| SE | SEPT10    | - | chr2:109545384-109545542  | NA | 0.137 | 9.50E-12        | 0.069  | 4.54E-07        |   |
| SE | HMG5      | - | chrX:81197705-81197778    | NA | 0.137 | 0.02630321839   | 0.001  |                 | 1 |
| SE | PPM1A     | + | chr14:60250379-60250481   | NA | 0.136 | 0.002092126104  | 0.003  |                 | 1 |

|    |           |   |                           |    |       |                 |        |                 |
|----|-----------|---|---------------------------|----|-------|-----------------|--------|-----------------|
| SE | PDCD10    | - | chr3:167725400-167725473  | NA | 0.136 | 0.002643161609  | 0.024  | 1               |
| SE | TJAP1     | + | chr6:43478658-43478718    | NA | 0.136 | 6.56E-08        | 0.004  | 1               |
| SE | TMEM259   | - | chr19:1011095-1011195     | NA | 0.136 | 1.43E-11        | -0.003 | 1               |
| SE | GPATCH8   | - | chr17:44467096-44467114   | NA | 0.136 | 0.01205057511   | -0.023 | 1               |
| SE | TRMT1     | - | chr19:13109914-13110001   | NA | 0.135 | 0.02576294352   | -0.08  | 0.001079766575  |
| SE | SEMA3D    | - | chr7:85097804-85097965    | NA | 0.135 | 0.03294531518   | 0.002  | 1               |
| SE | TSEN2     | + | chr3:12505153-12505231    | NA | 0.135 | 0.02398359823   | -0.015 | 1               |
| SE | TOP3B     | - | chr22:21975904-21976187   | NA | 0.134 | 0.0003277096277 | -0.02  | 1               |
| SE | SP110     | - | chr2:230216780-230216821  | NA | 0.134 | 0.04267665388   | -0.019 | 1               |
| SE | VKORC1    | - | chr16:31093311-31093482   | NA | 0.134 | 0.0001852608114 | -0.058 | 3.77E-12        |
| SE | IP6K2     | - | chr3:48694458-48694525    | NA | 0.133 | 0.003363630737  | 0.013  | 1               |
| SE | MTMR3     | + | chr22:29970975-29971062   | NA | 0.133 | 0.01356089458   | -0.007 | 1               |
| SE | COL12A1   | - | chr6:75138319-75138340    | NA | 0.133 | 0.006341438047  | 0.017  | 1               |
| SE | STAU1     | - | chr20:49165996-49166285   | NA | 0.133 | 1.66E-05        | 0.053  | 0.005303244308  |
| SE | C16orf13  | - | chr16:634888-634956       | NA | 0.133 | 0.0006246456998 | -0.022 | 1               |
| SE | FAM189B   | - | chr1:155250275-155250821  | NA | 0.133 | 0.004324272947  | -0.002 | 1               |
| SE | TBC1D23   | + | chr3:100311832-100311877  | NA | 0.132 | 0.0001948670864 | 0.026  | 1.62E-07        |
| SE | CCNT2     | + | chr2:134945786-134945982  | NA | 0.132 | 0.02298175873   | 0.056  | 6.14E-05        |
| SE | CREM      | + | chr10:35201450-35201486   | NA | 0.132 | 0.003127472154  | -0.069 | 0.001607562557  |
| SE | OCIAD1    | + | chr4:48831226-48831496    | NA | 0.132 | 0.02831425901   | 0.019  | 0.08659141384   |
| SE | FXR1      | + | chr3:180971074-180971155  | NA | 0.132 | 0               | 0.014  | 0.0009531020857 |
| SE | TRIM41    | + | chr5:181233412-181233435  | NA | 0.132 | 0.00683098948   | 0.019  | 1               |
| SE | UAP1L1    | + | chr9:137078049-137078254  | NA | 0.132 | 0.02820264394   | 0.015  | 1               |
| SE | PET100    | + | chr19:7631231-7631321     | NA | 0.132 | 0               | -0.005 | 0.4987957518    |
| SE | ADRM1     | + | chr20:62304460-62304577   | NA | 0.131 | 0               | 0.003  | 1               |
| SE | GAK       | - | chr4:851749-851974        | NA | 0.131 | 0.002471213769  | 0      | 1               |
| SE | DNAJC13   | + | chr3:132462466-132462523  | NA | 0.13  | 0.003988133396  | -0.001 | 1               |
| SE | SENP3     | + | chr17:7565694-7565764     | NA | 0.13  | 0.0008458178938 | -0.041 | 0.0001097197167 |
| SE | MTX3      | - | chr5:79990593-79990663    | NA | 0.13  | 0.0006469923546 | -0.012 | 1               |
| SE | ABI1      | - | chr10:26755654-26755741   | NA | 0.129 | 0.0001864371792 | 0.096  | 1.45E-05        |
| SE | TMEM219   | + | chr16:29972041-29972140   | NA | 0.129 | 1.05E-05        | 0.007  | 1               |
| SE | RCHY1     | - | chr4:75491582-75491637    | NA | 0.129 | 0.04831464141   | -0.039 | 0.9821681081    |
| SE | HNRNPH1   | - | chr5:179619268-179619360  | NA | 0.129 | 5.52E-09        | 0.023  | 0.1229639939    |
| SE | ZNF569    | - | chr19:37454833-37455073   | NA | 0.129 | 0.003350576238  | 0.017  | 1               |
| SE | USP36     | - | chr17:78796316-78796494   | NA | 0.128 | 0.001449853653  | 0.026  | 1               |
| SE | TGFB3     | - | chr14:75960268-75960386   | NA | 0.128 | 0.009293494939  | 0.008  | 0.1390942615    |
| SE | SCPEP1    | + | chr17:56998373-56998498   | NA | 0.128 | 0.01954785441   | -0.004 | 1               |
| SE | UBA1      | + | chrX:47198166-47198355    | NA | 0.128 | 1.49E-10        | 0.015  | 0.0002299308617 |
| SE | PUF60     | - | chr8:143827384-143827536  | NA | 0.128 | 0.000780430881  | -0.007 | 0.001798425144  |
| SE | SH3YL1    | - | chr2:242797-242871        | NA | 0.127 | 6.59E-08        | 0.033  | 0.01598709411   |
| SE | TFIP11    | - | chr22:26511118-26511317   | NA | 0.127 | 0.0127859952    | 0.015  | 1               |
| SE | CEP152    | - | chr15:48748442-48748610   | NA | 0.127 | 0.002066660603  | -0.087 | 1               |
| SE | GNPDA1    | - | chr5:142012287-142012339  | NA | 0.127 | 0.0001952559675 | -0.077 | 5.36E-11        |
| SE | AHI1      | - | chr6:135297431-135297492  | NA | 0.127 | 0.02667616491   | 0.015  | 1               |
| SE | GNE       | - | chr9:36236831-36236984    | NA | 0.127 | 0.003266110278  | -0.063 | 0               |
| SE | R3HDM2    | - | chr12:57297327-57297387   | NA | 0.127 | 0.0003145254367 | -0.027 | 0               |
| SE | ARHGEF1   | + | chr19:41892024-41892123   | NA | 0.126 | 0.008891331548  | -0.029 | 6.36E-10        |
| SE | RAB34     | - | chr17:28717212-28717647   | NA | 0.126 | 0.01139775805   | 0.004  | 1               |
| SE | DHRS1     | - | chr14:24291555-24291625   | NA | 0.126 | 0.04221843917   | 0.008  | 1               |
| SE | PCBP4     | - | chr3:51961940-51962088    | NA | 0.125 | 0.02326580329   | -0.038 | 1               |
| SE | PFDN5     | + | chr12:53296453-53296551   | NA | 0.125 | 0.006837178035  | 0.049  | 1.20E-11        |
| SE | ARHGAP32  | - | chr11:129040927-129041009 | NA | 0.125 | 0.0008706042036 | -0.031 | 1               |
| SE | KIAA2026  | - | chr9:5933750-5933881      | NA | 0.125 | 0.005769454447  | -0.062 | 1               |
| SE | SLK       | + | chr10:104002171-104003527 | NA | 0.124 | 2.43E-08        | 0.008  | 1               |
| SE | ARVCF     | - | chr22:19972357-19972411   | NA | 0.124 | 0.003171110219  | -0.015 | 1               |
| SE | UBE2E1    | + | chr3:23811459-23811510    | NA | 0.124 | 0               | 0.004  | 1               |
| SE | RPS28     | + | chr19:8321655-8321703     | NA | 0.124 | 0.01756076189   | 0      | 1               |
| SE | TNFRSF12A | + | chr16:3021214-3021319     | NA | 0.123 | 0.001898049618  | 0.001  | 1               |
| SE | LRRC23    | + | chr12:6907314-6907445     | NA | 0.123 | 0.0002615336253 | -0.023 | 6.91E-09        |
| SE | ASPM      | - | chr1:197100430-197105185  | NA | 0.123 | 0.009515144024  | -0.006 | 0.05706057739   |
| SE | FANCI     | + | chr15:89245194-89245311   | NA | 0.123 | 8.00E-09        | -0.012 | 1               |
| SE | ARNT      | - | chr1:150842423-150842468  | NA | 0.123 | 0.0001999884726 | -0.046 | 0.1877618683    |
| SE | GATC      | + | chr12:120454932-120455030 | NA | 0.123 | 8.48E-06        | 0.012  | 1               |

|    |           |   |                           |    |       |                 |        |                 |
|----|-----------|---|---------------------------|----|-------|-----------------|--------|-----------------|
| SE | SNX11     | + | chr17:48110707-48110767   | NA | 0.122 | 4.93E-05        | -0.026 | 0.0522783913    |
| SE | NDUFC1    | - | chr4:139297384-139297443  | NA | 0.122 | 0.02506932821   | -0.057 | 0.0002301436447 |
| SE | HYKK      | + | chr15:78513083-78513425   | NA | 0.122 | 0.01097352416   | 0.001  | 1               |
| SE | GLMP      | - | chr1:156293319-156293429  | NA | 0.122 | 0.007592639129  | -0.03  | 0.0004217889346 |
| SE | THAP9-AS1 | - | chr4:82897988-82898062    | NA | 0.122 | 0.02355317783   | 0.048  | 1               |
| SE | GRAMD4    | + | chr22:46676599-46676668   | NA | 0.121 | 0.0341951532    | -0.026 | 1.83E-10        |
| SE | PPP6R2    | + | chr22:50391866-50392015   | NA | 0.121 | 0.01437782339   | -0.073 | 1               |
| SE | TMEM87B   | + | chr2:112077191-112077282  | NA | 0.121 | 0.007276760501  | -0.012 | 1               |
| SE | KNTC1     | + | chr12:122601535-122601625 | NA | 0.121 | 0.002873453659  | 0.008  | 1               |
| SE | DDX42     | + | chr17:63799588-63799625   | NA | 0.121 | 6.10E-06        | -0.022 | 0.0004885254591 |
| SE | LINC01021 | + | chr5:27477638-27477801    | NA | 0.121 | 0.03820251916   | 0.1    | 1               |
| SE | CHORDC1   | - | chr11:90206747-90206810   | NA | 0.12  | 3.29E-05        | 0.068  | 9.72E-06        |
| SE | CENPA     | + | chr2:26792755-26792833    | NA | 0.12  | 5.47E-05        | -0.003 | 1               |
| SE | C9orf156  | - | chr9:97912872-97912975    | NA | 0.12  | 0.01516291276   | -0.01  | 1               |
| SE | PRR4      | - | chr12:11121009-11121180   | NA | 0.119 | 0.0009347379716 | -0.038 | 0.9228271422    |
| SE | GLS       | + | chr2:190913192-190913364  | NA | 0.119 | 2.51E-07        | 0.002  | 1               |
| SE | YLPM1     | + | chr14:74824255-74824307   | NA | 0.119 | 0.0005060879067 | 0.005  | 1               |
| SE | SPOP      | - | chr17:49636758-49636809   | NA | 0.119 | 0.004939913488  | 0.001  | 1               |
| SE | TMEM62    | + | chr15:43138573-43138619   | NA | 0.119 | 0.02228420277   | -0.089 | 1               |
| SE | TPCN2     | + | chr11:69067502-69067605   | NA | 0.119 | 0.03637629393   | 0      | 1               |
| SE | RAB34     | - | chr17:28717212-28717593   | NA | 0.118 | 0.005954277431  | 0      | 1               |
| SE | SRSF7     | - | chr2:38748897-38749346    | NA | 0.118 | 8.21E-09        | -0.002 | 1               |
| SE | ESCO2     | + | chr8:27783999-27784057    | NA | 0.118 | 0.04261741669   | 0.01   | 1               |
| SE | MLF1      | + | chr3:158588851-158588924  | NA | 0.118 | 8.38E-08        | 0.011  | 1               |
| SE | PRKDC     | - | chr8:47782161-47782254    | NA | 0.118 | 1.08E-13        | 0.066  | 0.001044918815  |
| SE | ZNF195    | - | chr11:3361975-3362073     | NA | 0.117 | 0.004491791827  | 0.037  | 0.2244350862    |
| SE | PPP5C     | + | chr19:46383410-46383476   | NA | 0.117 | 4.00E-13        | -0.053 | 1.26E-05        |
| SE | UBE3A     | - | chr15:25407066-25407262   | NA | 0.117 | 0.002354815036  | 0.006  | 1               |
| SE | C16orf13  | - | chr16:634888-635063       | NA | 0.117 | 0.0001053612437 | -0.01  | 1               |
| SE | DENND5A   | - | chr11:9142721-9143485     | NA | 0.117 | 0.02602112914   | -0.033 | 1.83E-08        |
| SE | NOMO2     | - | chr16:18528012-18528071   | NA | 0.117 | 0.01502360744   | 0.096  | 1               |
| SE | CORO7     | - | chr16:4415714-4415852     | NA | 0.117 | 2.30E-05        | -0.005 | 1               |
| SE | IFT88     | + | chr13:20663262-20663386   | NA | 0.116 | 2.64E-05        | -0.013 | 1               |
| SE | USP33     | - | chr1:77715741-77715868    | NA | 0.116 | 0.01924510814   | -0.023 | 1               |
| SE | ITGAE     | - | chr17:3723287-3723383     | NA | 0.116 | 0               | 0.011  | 1               |
| SE | COQ5      | - | chr12:120526456-120526546 | NA | 0.116 | 8.30E-07        | 0.108  | 4.46E-09        |
| SE | ZNF133    | + | chr20:18297984-18298062   | NA | 0.116 | 0.04998063542   | -0.059 | 1               |
| SE | SGCE      | - | chr7:94639340-94639448    | NA | 0.116 | 0.002822164336  | 0.032  | 1               |
| SE | PCGF6     | - | chr10:103347237-103347297 | NA | 0.116 | 0.01001026167   | -0.102 | 0.0002471633823 |
| SE | CEP57L1   | + | chr6:109155790-109155877  | NA | 0.116 | 0.001692970305  | 0.004  | 1               |
| SE | DZIP3     | + | chr3:108605334-108605438  | NA | 0.116 | 0.002236110888  | -0.045 | 1               |
| SE | RAB34     | - | chr17:28717212-28717620   | NA | 0.115 | 0.006132731773  | 0      | 1               |
| SE | NENF      | + | chr1:212442564-212442625  | NA | 0.115 | 0.0001526398926 | -0.018 | 9.75E-06        |
| SE | RAB34     | - | chr17:28717212-28717647   | NA | 0.114 | 0.006207750042  | 0      | 1               |
| SE | NDUFS8    | + | chr11:68035627-68035788   | NA | 0.114 | 1.32E-06        | 0.003  | 1               |
| SE | MED6      | - | chr14:70585755-70585783   | NA | 0.114 | 1.29E-09        | 0.003  | 1               |
| SE | UGGT1     | + | chr2:128156391-128156415  | NA | 0.114 | 0.002140032246  | 0.042  | 1               |
| SE | CD320     | - | chr19:8303854-8304088     | NA | 0.114 | 0.0006458606726 | -0.025 | 2.09E-09        |
| SE | AK2       | - | chr1:33012073-33012122    | NA | 0.113 | 2.89E-14        | 0.032  | 2.68E-06        |
| SE | RECQL     | - | chr12:21501169-21501372   | NA | 0.113 | 0.002987512401  | -0.03  | 1               |
| SE | DLGAP4    | + | chr20:36465264-36465367   | NA | 0.113 | 0.006207750042  | 0.011  | 1               |
| SE | DGUOK     | + | chr2:73950626-73950732    | NA | 0.113 | 1.12E-08        | 0.138  | 0               |
| SE | SGK494    | - | chr17:28612261-28612366   | NA | 0.113 | 0.03885696071   | -0.029 | 1               |
| SE | SH2B1     | + | chr16:28866011-28867033   | NA | 0.113 | 0.005860391112  | 0.002  | 1               |
| SE | PPP2R3C   | - | chr14:35109818-35109901   | NA | 0.112 | 0.01192661118   | -0.004 | 1               |
| SE | TOP3B     | - | chr22:21975980-21976187   | NA | 0.112 | 0.0164236481    | -0.031 | 1               |
| SE | RARS2     | - | chr6:87545615-87545699    | NA | 0.112 | 0.004068455867  | -0.025 | 1               |
| SE | PAPD4     | + | chr5:79615074-79615163    | NA | 0.112 | 0.003439201947  | -0.004 | 1               |
| SE | MFF       | + | chr2:227342744-227342819  | NA | 0.112 | 2.01E-08        | -0.018 | 0.3763213742    |
| SE | ENTPD5    | - | chr14:73972883-73973024   | NA | 0.112 | 0.005732405631  | 0      | 1               |
| SE | TMEM63A   | - | chr1:225866573-225866682  | NA | 0.112 | 0.006984479321  | 0.001  | 1               |
| SE | ATP11C    | - | chrX:139737730-139737796  | NA | 0.111 | 0.01111677213   | 0.18   | 1               |
| SE | SPAG1     | + | chr8:100220278-100220431  | NA | 0.111 | 0.003664403339  | -0.012 | 1               |

|    |            |   |                           |    |       |                 |        |                 |   |
|----|------------|---|---------------------------|----|-------|-----------------|--------|-----------------|---|
| SE | CARD8      | - | chr19:48223718-48223868   | NA | 0.111 | 0.02523536706   | -0.019 |                 | 1 |
| SE | CLIP1      | - | chr12:122351110-122351143 | NA | 0.111 | 0.003673171316  | 0.078  |                 | 1 |
| SE | CPSF7      | - | chr11:61420469-61420530   | NA | 0.111 | 0.002471171293  | -0.016 | 5.46E-05        |   |
| SE | GSAP       | - | chr7:77353571-77353641    | NA | 0.111 | 0.01348537548   | 0.014  |                 | 1 |
| SE | SUSD1      | - | chr9:112042100-112042165  | NA | 0.11  | 0.01062440517   | -0.002 |                 | 1 |
| SE | SRSF6      | + | chr20:43459152-43459420   | NA | 0.11  | 0.0009388080305 | 0.069  | 0.08187010603   |   |
| SE | ECSIT      | - | chr19:11519074-11519193   | NA | 0.11  | 0.001119481664  | -0.054 | 2.61E-07        |   |
| SE | STXBP1     | + | chr9:127684367-127684493  | NA | 0.11  | 1.02E-06        | 0.024  | 4.37E-10        |   |
| SE | APLP2      | + | chr11:130123611-130123779 | NA | 0.109 | 0.02102855911   | -0.054 | 0.06573600478   |   |
| SE | AP3B1      | - | chr5:78175625-78175697    | NA | 0.109 | 2.62E-06        | 0.006  |                 | 1 |
| SE | WARS       | - | chr14:100375282-100375350 | NA | 0.109 | 0.003593871272  | -0.127 | 0.009775879358  |   |
| SE | DAK        | + | chr11:61343341-61343458   | NA | 0.109 | 0.002348355715  | -0.017 | 0.009262246572  |   |
| SE | PRKAG1     | - | chr12:49005742-49005852   | NA | 0.109 | 1.93E-09        | -0.038 | 3.69E-11        |   |
| SE | CKLF       | + | chr16:66563121-66563217   | NA | 0.109 | 2.44E-06        | -0.007 | 0.4918071069    |   |
| SE | TMEM260    | + | chr14:56593114-56593317   | NA | 0.108 | 0.02900749021   | 0.019  |                 | 1 |
| SE | SEC22C     | - | chr3:42563764-42563880    | NA | 0.108 | 5.82E-12        | -0.01  | 0.03225444425   |   |
| SE | CENPT      | - | chr16:67832227-67832350   | NA | 0.108 | 0.000723793159  | -0.005 |                 | 1 |
| SE | PEX7       | + | chr6:136866626-136866733  | NA | 0.108 | 0.01676038414   | -0.007 |                 | 1 |
| SE | FAM120B    | + | chr6:170348150-170348323  | NA | 0.108 | 0.006986795451  | -0.008 |                 | 1 |
| SE | SPIRE1     | - | chr18:12459754-12459928   | NA | 0.108 | 0.001432568516  | -0.043 |                 | 1 |
| SE | KIF16B     | - | chr20:16335925-16336015   | NA | 0.107 | 0.016488075     | 0.013  |                 | 1 |
| SE | CENPT      | - | chr16:67832227-67832354   | NA | 0.107 | 0.0006888228651 | -0.006 |                 | 1 |
| SE | ZNF326     | + | chr1:90007344-90007750    | NA | 0.107 | 6.21E-05        | 0.003  |                 | 1 |
| SE | SUN1       | + | chr7:849519-849603        | NA | 0.107 | 1.48E-09        | -0.009 | 0.1970997238    |   |
| SE | LRTOMT     | + | chr11:72089416-72089596   | NA | 0.107 | 0.02085996974   | -0.022 | 0.01970884038   |   |
| SE | SYNRG      | - | chr17:37577379-37577613   | NA | 0.107 | 0.009170669219  | -0.053 | 2.99E-11        |   |
| SE | MYO19      | - | chr17:36501851-36501901   | NA | 0.107 | 0.00682352165   | 0.196  | 1.40E-11        |   |
| SE | ATP6V0A1   | + | chr17:42507519-42507627   | NA | 0.106 | 7.40E-05        | -0.003 |                 | 1 |
| SE | DDX58      | - | chr9:32492390-32492538    | NA | 0.106 | 0.002559520408  | -0.012 |                 | 1 |
| SE | DDX50      | + | chr10:68906225-68906337   | NA | 0.106 | 1.74E-06        | 0.021  |                 | 1 |
| SE | RTN4       | - | chr2:55028163-55028220    | NA | 0.106 | 4.37E-06        | 0.032  | 4.56E-09        |   |
| SE | CDCA7      | + | chr2:173359342-173359491  | NA | 0.106 | 0.0004100811703 | 0.101  | 7.40E-06        |   |
| SE | CENPJ      | - | chr13:24886233-24886385   | NA | 0.106 | 0.02450060409   | 0.02   | 0.2310102641    |   |
| SE | MIA3       | + | chr1:222662887-222663031  | NA | 0.106 | 0.02231683261   | -0.004 |                 | 1 |
| SE | FAM208A    | - | chr3:56638705-56638765    | NA | 0.106 | 0.0001130893075 | 0.003  |                 | 1 |
| SE | CTBP2      | - | chr10:125110989-125111093 | NA | 0.106 | 0.04007048318   | -0.008 |                 | 1 |
| SE | BCL2L12    | + | chr19:49667018-49667161   | NA | 0.105 | 0.01389440019   | -0.024 | 0.4661532477    |   |
| SE | ZGRF1      | - | chr4:112589723-112589874  | NA | 0.105 | 0.01226428593   | -0.026 |                 | 1 |
| SE | ESCO2      | + | chr8:27780173-27780267    | NA | 0.105 | 0.04297087789   | 0.004  |                 | 1 |
| SE | TMEM230    | - | chr20:5111763-5111808     | NA | 0.104 | 0.002611775813  | 0.01   |                 | 1 |
| SE | DHPS       | - | chr19:12677107-12677211   | NA | 0.104 | 2.35E-13        | -0.02  | 1.13E-06        |   |
| SE | CEP192     | + | chr18:13058293-13058435   | NA | 0.104 | 1.04E-05        | 0.007  |                 | 1 |
| SE | PAPD7      | + | chr5:6743711-6743840      | NA | 0.104 | 2.72E-05        | -0.004 |                 | 1 |
| SE | ENOSF1     | - | chr18:677344-677444       | NA | 0.104 | 0.001190248648  | -0.009 |                 | 1 |
| SE | SLC38A6    | + | chr14:61034018-61034113   | NA | 0.104 | 0.001528473657  | 0.018  |                 | 1 |
| SE | FAM227B    | - | chr15:49611214-49611268   | NA | 0.104 | 0.02259035035   | 0.005  |                 | 1 |
| SE | SERPINB6   | - | chr6:2968778-2968913      | NA | 0.103 | 2.38E-05        | 0.007  |                 | 1 |
| SE | GNPDA1     | - | chr5:142012287-142012377  | NA | 0.102 | 3.27E-05        | -0.065 | 3.15E-14        |   |
| SE | CDCA7      | + | chr2:173363999-173364161  | NA | 0.102 | 0.003022493822  | 0.021  | 0.01067769121   |   |
| SE | SIDT2      | + | chr11:117186989-117187001 | NA | 0.102 | 0.001234249565  | 0.102  | 2.31E-05        |   |
| SE | CENPJ      | - | chr13:24886234-24886385   | NA | 0.102 | 0.02219822181   | 0.027  | 0.06661899907   |   |
| SE | FRS2       | + | chr12:69537915-69537983   | NA | 0.102 | 0.007194573322  | 0.024  |                 | 1 |
| SE | RNF10      | + | chr12:120539367-120539468 | NA | 0.101 | 0.0004537657274 | 0.019  | 0.0003902832663 |   |
| SE | TEAD2      | - | chr19:49359843-49360081   | NA | 0.101 | 0.0003628054664 | 0.003  |                 | 1 |
| SE | DTWD1      | + | chr15:49630955-49631058   | NA | 0.101 | 2.38E-08        | -0.012 | 0.1724486627    |   |
| SE | RAB34      | - | chr17:28717212-28717398   | NA | 0.101 | 0.007840343391  | -0.001 |                 | 1 |
| SE | GOLT1B     | + | chr12:21508382-21508561   | NA | 0.101 | 6.35E-09        | 0.011  |                 | 1 |
| SE | DGUOK      | + | chr2:73950584-73950732    | NA | 0.101 | 0.007035617093  | 0.019  | 0.04222875936   |   |
| SE | RARS2      | - | chr6:87548590-87548646    | NA | 0.101 | 0.004302882599  | -0.029 | 1.49E-13        |   |
| SE | TBC1D31    | + | chr8:123082701-123082817  | NA | 0.101 | 0.0004520812027 | -0.055 |                 | 1 |
| SE | RPUSD4     | - | chr11:126206253-126206553 | NA | 0.101 | 0.0003073383043 | 0.004  | 0.3340085523    |   |
| SE | KPNA5      | + | chr6:116692054-116692156  | NA | 0.101 | 0.005599612143  | 0.004  |                 | 1 |
| SE | AC007040.1 | - | chr2:70991829-70991983    | NA | 0.101 | 0.01868342172   | -0.044 | 3.91E-13        |   |

|    |           |   |                           |    |        |                 |        |               |   |
|----|-----------|---|---------------------------|----|--------|-----------------|--------|---------------|---|
| SE | CWF19L1   | - | chr10:100250247-100250332 | NA | -0.101 | 0.00170288151   | -0.005 |               | 1 |
| SE | CABIN1    | + | chr22:24041138-24041273   | NA | -0.101 | 0.03112960624   | -0.035 |               | 1 |
| SE | NHP2L1    | - | chr22:41682355-41682587   | NA | -0.101 | 1.11E-11        | 0.02   | 3.20E-08      |   |
| SE | CARF      | + | chr2:202974333-202974496  | NA | -0.101 | 0.003230019984  | -0.027 |               | 1 |
| SE | CENPE     | - | chr4:103143247-103143406  | NA | -0.101 | 3.31E-05        | -0.022 |               | 1 |
| SE | DOLPP1    | + | chr9:129086138-129086267  | NA | -0.101 | 0.01074850663   | -0.004 |               | 1 |
| SE | BAG6      | - | chr6:31644306-31644414    | NA | -0.101 | 0.03174855014   | -0.102 |               | 0 |
| SE | CHMP2B    | + | chr3:87240322-87240453    | NA | -0.102 | 0.04720535292   | -0.005 | 0.267483413   |   |
| SE | UBE2Q2    | + | chr15:75890434-75890483   | NA | -0.102 | 0.004301470106  | -0.009 |               | 1 |
| SE | GFM2      | - | chr5:74738501-74738642    | NA | -0.102 | 0.01693677111   | -0.043 | 6.60E-06      |   |
| SE | KIAA0430  | - | chr16:15624768-15624927   | NA | -0.102 | 0.002706069451  | 0.004  |               | 1 |
| SE | PSMA3-AS1 | - | chr14:58293313-58293544   | NA | -0.102 | 0.005554562012  | 0.001  |               | 1 |
| SE | TOP3B     | - | chr22:21970209-21970406   | NA | -0.103 | 0.02168639396   | 0.003  |               | 1 |
| SE | PHF3      | + | chr6:63678827-63679020    | NA | -0.103 | 7.80E-07        | 0.033  |               | 1 |
| SE | ZNF692    | - | chr1:248856372-248856422  | NA | -0.103 | 0.001282264471  | -0.019 |               | 1 |
| SE | ZNF562    | - | chr19:9658008-9658135     | NA | -0.103 | 0.03489005793   | 0.004  |               | 1 |
| SE | UBTF      | - | chr17:44208618-44209001   | NA | -0.104 | 6.26E-08        | -0.003 |               | 1 |
| SE | POT1      | - | chr7:124870910-124871041  | NA | -0.104 | 0.01884693048   | -0.005 |               | 1 |
| SE | UBR3      | + | chr2:169877493-169877637  | NA | -0.104 | 0.002544829601  | 0.021  |               | 1 |
| SE | NMT2      | - | chr10:15130141-15130312   | NA | -0.104 | 0.001857369881  | -0.003 |               | 1 |
| SE | ZBTB8OS   | - | chr1:32633261-32633354    | NA | -0.104 | 0.005563206351  | 0.008  |               | 1 |
| SE | PSTK      | + | chr10:122986299-122986375 | NA | -0.104 | 0.04261741669   | -0.051 | 1.21E-07      |   |
| SE | RB1CC1    | - | chr8:52685936-52686156    | NA | -0.105 | 0.0001409018816 | 0.037  |               | 1 |
| SE | TNRC6A    | + | chr16:24776932-24777358   | NA | -0.105 | 0.006129789789  | -0.01  |               | 1 |
| SE | SMC4      | + | chr3:160412529-160412849  | NA | -0.105 | 1.36E-12        | 0      |               | 1 |
| SE | METTL14   | + | chr4:118705610-118705821  | NA | -0.105 | 5.49E-05        | -0.016 |               | 1 |
| SE | RPRD2     | + | chr1:150464526-150464727  | NA | -0.105 | 0.001107474483  | -0.019 |               | 1 |
| SE | ZNF561    | - | chr19:9617620-9617768     | NA | -0.105 | 0.006032195647  | -0.002 |               | 1 |
| SE | GABBR1    | - | chr6:29608600-29608733    | NA | -0.105 | 0.0005418065682 | -0.016 |               | 1 |
| SE | HRSP12    | - | chr8:98108645-98108713    | NA | -0.106 | 0.00140484798   | -0.013 | 0.09155746834 |   |
| SE | ANAPC11   | + | chr17:81899241-81899542   | NA | -0.106 | 0               | 0      |               | 1 |
| SE | PAM       | + | chr5:103025130-103025334  | NA | -0.106 | 0.001547919879  | 0.005  |               | 1 |
| SE | SFXN2     | + | chr10:102729318-102729394 | NA | -0.106 | 0.04627864623   | -0.153 | 5.96E-10      |   |
| SE | NAA16     | + | chr13:41355143-41355216   | NA | -0.106 | 0.009473724616  | 0.015  |               | 1 |
| SE | SEC24C    | + | chr10:73746629-73746716   | NA | -0.106 | 8.85E-06        | -0.008 |               | 1 |
| SE | SNHG5     | - | chr6:85677790-85677875    | NA | -0.106 | 4.04E-11        | -0.135 | 3.15E-14      |   |
| SE | KATNAL1   | - | chr13:30255446-30255615   | NA | -0.107 | 0.0002645918642 | -0.019 |               | 1 |
| SE | COQ3      | - | chr6:99383007-99383130    | NA | -0.107 | 0.009287960857  | 0.009  |               | 1 |
| SE | FAM175A   | - | chr4:83470202-83470396    | NA | -0.107 | 0.03069639954   | -0.004 |               | 1 |
| SE | NUP50     | + | chr22:45170987-45171152   | NA | -0.108 | 0.0205273931    | 0.018  | 0.2460414665  |   |
| SE | MFSD10    | - | chr4:2931554-2931663      | NA | -0.108 | 0.0007475297347 | -0.065 | 3.15E-14      |   |
| SE | ACAD10    | + | chr12:111729805-111729956 | NA | -0.108 | 0.01123275744   | -0.056 |               | 1 |
| SE | GABPB2    | + | chr1:151073038-151073157  | NA | -0.108 | 0.03900299778   | 0.001  |               | 1 |
| SE | C5orf45   | - | chr5:179851242-179851337  | NA | -0.108 | 0.009537224812  | 0      |               | 1 |
| SE | RP11-33B1 | + | chr4:119488644-119488717  | NA | -0.108 | 0.002384550275  | -0.01  |               | 1 |
| SE | RBM6      | + | chr3:49967197-49968748    | NA | -0.109 | 2.69E-05        | -0.006 |               | 1 |
| SE | DCUN1D4   | + | chr4:51905188-51905320    | NA | -0.109 | 2.74E-06        | 0.015  |               | 1 |
| SE | TIMM8B    | - | chr11:112085966-112086310 | NA | -0.109 | 0.0008728679574 | -0.003 |               | 1 |
| SE | CHURC1    | + | chr14:64926009-64926080   | NA | -0.109 | 9.60E-08        | 0      |               | 1 |
| SE | VPS41     | - | chr7:38796414-38796526    | NA | -0.11  | 1.23E-08        | 0.001  |               | 1 |
| SE | TUBD1     | - | chr17:59886082-59886230   | NA | -0.11  | 0.03243601941   | -0.046 |               | 1 |
| SE | WHSC1     | + | chr4:1954536-1954685      | NA | -0.11  | 2.54E-05        | 0.004  |               | 1 |
| SE | BCHE      | - | chr3:165777716-165777795  | NA | -0.11  | 1.52E-06        | 0.006  | 7.54E-09      |   |
| SE | TMEM45A   | + | chr3:100519076-100519316  | NA | -0.11  | 6.71E-06        | 0.005  |               | 1 |
| SE | ARID4B    | - | chr1:235213768-235214026  | NA | -0.111 | 0.002459905923  | 0.036  |               | 1 |
| SE | HNRNPUL1  | + | chr19:41305831-41305867   | NA | -0.111 | 0.000558909809  | -0.011 | 0.5809769352  |   |
| SE | HACL1     | - | chr3:15574976-15575082    | NA | -0.111 | 0.0003159746893 | -0.045 |               | 1 |
| SE | BCL2L11   | + | chr2:111123732-111123869  | NA | -0.111 | 0.01404100243   | 0.046  |               | 1 |
| SE | SLC37A3   | - | chr7:140345868-140345970  | NA | -0.111 | 0.01020257768   | -0.035 |               | 1 |
| SE | EDC3      | - | chr15:74687090-74687179   | NA | -0.111 | 0.0231839421    | -0.005 |               | 1 |
| SE | PMS2CL    | + | chr7:6737075-6737936      | NA | -0.111 | 0.0004879258515 | 0.033  |               | 1 |
| SE | GTF2IP1   | - | chr7:75202541-75202613    | NA | -0.111 | 0.0239620042    | 0.016  |               | 1 |
| SE | RABGAP1   | + | chr9:122945331-122945432  | NA | -0.112 | 0.001312112384  | -0.011 |               | 1 |

|    |          |   |                           |    |        |                 |        |                 |
|----|----------|---|---------------------------|----|--------|-----------------|--------|-----------------|
| SE | RPLP0    | - | chr12:120198553-120198739 | NA | -0.112 | 0               | -0.009 | 0               |
| SE | TOM1     | + | chr22:35321958-35322019   | NA | -0.112 | 0.02259035035   | -0.042 | 0.00244859248   |
| SE | HMGCR    | + | chr5:75355055-75355214    | NA | -0.112 | 0               | 0.012  | 1               |
| SE | B4GALT3  | - | chr1:161176911-161177106  | NA | -0.112 | 2.40E-08        | 0.002  | 0.3906935861    |
| SE | TMEM194A | - | chr12:57069233-57069306   | NA | -0.112 | 0.043757897     | -0.018 | 1               |
| SE | ZFAS1    | + | chr20:49280484-49280570   | NA | -0.112 | 5.59E-14        | -0.074 | 0               |
| SE | ASPH     | - | chr8:61646749-61646878    | NA | -0.112 | 0               | -0.002 | 1               |
| SE | TADA2A   | + | chr17:37423508-37423615   | NA | -0.112 | 0.007108285273  | 0.012  | 1               |
| SE | CHFR     | - | chr12:132870723-132870783 | NA | -0.113 | 0.009067303247  | -0.033 | 1               |
| SE | MVK      | + | chr12:109579801-109579946 | NA | -0.113 | 0.019011357     | -0.089 | 0.0005025009757 |
| SE | B3GALNT1 | - | chr3:161089959-161090062  | NA | -0.113 | 0.01458009455   | 0.058  | 4.50E-12        |
| SE | FUT8     | + | chr14:65430215-65430309   | NA | -0.114 | 0.02578183739   | 0.006  | 1               |
| SE | EPB41L2  | - | chr6:130878103-130878250  | NA | -0.114 | 1.20E-05        | -0.222 | 2.05E-13        |
| SE | MYL6     | + | chr12:56159586-56159622   | NA | -0.114 | 0.003043669782  | -0.013 | 0               |
| SE | ZNF317   | + | chr19:9157979-9158075     | NA | -0.114 | 0.01281397378   | -0.031 | 1               |
| SE | CDK7     | + | chr5:69254601-69254669    | NA | -0.114 | 0.01973663004   | -0.014 | 1               |
| SE | BORA     | + | chr13:72734959-72735005   | NA | -0.114 | 0.02872793168   | -0.105 | 0               |
| SE | FAM188A  | - | chr10:15816834-15816915   | NA | -0.114 | 0.03671992905   | -0.026 | 0.4593155239    |
| SE | TMEM67   | + | chr8:93791881-93792004    | NA | -0.114 | 0.02775592997   | 0.005  | 1               |
| SE | BRD7     | - | chr16:50326283-50326391   | NA | -0.114 | 6.79E-10        | 0.001  | 1               |
| SE | L3MBTL3  | + | chr6:130049650-130049830  | NA | -0.114 | 0.03879465813   | 0.039  | 1               |
| SE | MYO19    | - | chr17:36512657-36512779   | NA | -0.114 | 0.008854836282  | 0.062  | 0.2365470521    |
| SE | GLS      | + | chr2:190913192-190913364  | NA | -0.115 | 0.001084209801  | -0.053 | 1               |
| SE | INIP     | - | chr9:112701787-112701880  | NA | -0.115 | 0.0001351758142 | -0.007 | 1               |
| SE | ANO10    | - | chr3:43551471-43551588    | NA | -0.115 | 2.25E-05        | 0.005  | 0.9816504588    |
| SE | FBXO22   | + | chr15:75913202-75913290   | NA | -0.115 | 0.02857103996   | -0.004 | 1               |
| SE | GTF2E2   | - | chr8:30612298-30612481    | NA | -0.115 | 3.77E-11        | 0.013  | 1               |
| SE | NFATC3   | + | chr16:68221195-68221284   | NA | -0.116 | 0.0364768483    | -0.006 | 1               |
| SE | CDCA3    | - | chr12:6849322-6849413     | NA | -0.116 | 3.55E-08        | -0.103 | 0.004971439658  |
| SE | DLG4     | - | chr17:7191892-7192002     | NA | -0.116 | 0.004221254915  | -0.007 | 1               |
| SE | CARS2    | - | chr13:110648317-110649297 | NA | -0.116 | 1.25E-08        | 0.003  | 1               |
| SE | UBQLN1   | - | chr9:83666349-83666394    | NA | -0.116 | 0.01785569141   | -0.051 | 0.07701091082   |
| SE | N6AMT2   | - | chr13:20731840-20732121   | NA | -0.116 | 0.03161887069   | 0.028  | 0.2821223924    |
| SE | USP25    | + | chr21:15849776-15849872   | NA | -0.116 | 0.0002637844158 | 0.004  | 1               |
| SE | SLC12A2  | + | chr5:128177104-128177152  | NA | -0.117 | 4.35E-06        | -0.051 | 0.1017851617    |
| SE | NFYC     | + | chr1:40766917-40766974    | NA | -0.117 | 0.002262356732  | -0.008 | 0.01352635303   |
| SE | SEC14L2  | + | chr22:30415758-30416087   | NA | -0.117 | 0.0002925652383 | -0.038 | 7.19E-12        |
| SE | RPAIN    | + | chr17:5426235-5426299     | NA | -0.117 | 0.0008985289339 | -0.123 | 1.10E-11        |
| SE | CCNT1    | - | chr12:48695998-48696162   | NA | -0.117 | 0.005099606958  | -0.051 | 1               |
| SE | C6orf52  | - | chr6:10686965-10687056    | NA | -0.117 | 0.0084424949    | -0.004 | 1               |
| SE | SLC33A1  | - | chr3:155833467-155833585  | NA | -0.117 | 0.00728625754   | -0.006 | 1               |
| SE | URB2     | + | chr1:229645858-229645969  | NA | -0.118 | 0.004374083708  | 0.002  | 1               |
| SE | NUP54    | - | chr4:76134174-76134362    | NA | -0.118 | 3.46E-06        | 0.009  | 1               |
| SE | CDC25C   | - | chr5:138289479-138289563  | NA | -0.118 | 0.01782449163   | -0.038 | 1               |
| SE | TRAPP6B  | - | chr14:39154210-39154294   | NA | -0.118 | 0.01034319119   | -0.003 | 1               |
| SE | C12orf65 | + | chr12:123253646-123255033 | NA | -0.119 | 0.01080983012   | 0.011  | 1               |
| SE | ANK3     | - | chr10:60059697-60060033   | NA | -0.119 | 0.00550678331   | -0.196 | 3.65E-13        |
| SE | HEATR3   | + | chr16:50072604-50072714   | NA | -0.119 | 0.02655662668   | -0.026 | 1               |
| SE | GEMIN4   | - | chr17:749813-749909       | NA | -0.119 | 0.03462897539   | 0.038  | 1               |
| SE | HERC2P9  | + | chr15:28612058-28612173   | NA | -0.119 | 0.0384989077    | -0.019 | 1               |
| SE | ELOVL5   | - | chr6:53273219-53273344    | NA | -0.12  | 0               | -0.031 | 0.0170225618    |
| SE | PLEKHH1  | + | chr14:67586809-67586949   | NA | -0.12  | 0.0001479566393 | 0.017  | 3.40E-11        |
| SE | CCNC     | - | chr6:99544205-99544273    | NA | -0.12  | 1.47E-07        | 0.013  | 2.72E-06        |
| SE | LIAS     | + | chr4:39462195-39462289    | NA | -0.12  | 0.02343194834   | -0.02  | 1               |
| SE | RBCK1    | + | chr20:409883-410025       | NA | -0.12  | 0.006423577048  | -0.003 | 1               |
| SE | FKBP10   | + | chr17:41819840-41820023   | NA | -0.12  | 2.58E-07        | 0.019  | 0               |
| SE | LRCH3    | + | chr3:197866111-197866219  | NA | -0.12  | 1.39E-05        | -0.075 | 5.01E-05        |
| SE | PHTF2    | + | chr7:77937709-77937838    | NA | -0.121 | 1.21E-07        | -0.014 | 1               |
| SE | DHX9     | + | chr1:182855576-182855713  | NA | -0.121 | 3.15E-10        | 0.008  | 0.2382460916    |
| SE | AP1AR    | + | chr4:112262987-112263086  | NA | -0.121 | 0.002927110877  | -0.172 | 4.17E-13        |
| SE | TIMM8B   | - | chr11:112085977-112086310 | NA | -0.121 | 0.001838520626  | -0.004 | 1               |
| SE | ZNF202   | - | chr11:123727475-123727595 | NA | -0.121 | 1.81E-05        | -0.026 | 1               |
| SE | XRR1     | - | chr11:74909888-74910012   | NA | -0.121 | 0.00199678348   | -0.034 | 1               |



|    |          |   |                           |    |        |                 |        |                 |
|----|----------|---|---------------------------|----|--------|-----------------|--------|-----------------|
| SE | KATNAL2  | + | chr18:47046390-47046527   | NA | -0.121 | 0.01677792067   | 0.016  | 1               |
| SE | UBA2     | + | chr19:34430092-34430186   | NA | -0.122 | 2.15E-07        | 0.03   | 6.66E-08        |
| SE | PRKRIP1  | + | chr7:102397619-102397698  | NA | -0.122 | 0.0140171851    | -0.039 | 0.04239164553   |
| SE | CAMK1    | - | chr3:9765758-9765890      | NA | -0.122 | 0.001499769913  | -0.038 | 2.09E-07        |
| SE | GGACT    | - | chr13:100533562-100533774 | NA | -0.122 | 0.008751623156  | 0.063  | 1               |
| SE | RNF157   | - | chr17:76155251-76155317   | NA | -0.122 | 0.0145371809    | -0.027 | 3.60E-08        |
| SE | VPS8     | + | chr3:184922428-184922483  | NA | -0.122 | 6.66E-05        | -0.011 | 1               |
| SE | USP54    | - | chr10:73504849-73504990   | NA | -0.122 | 0.0168943985    | -0.023 | 1               |
| SE | ZNF561   | - | chr19:9617620-9617758     | NA | -0.122 | 0.002940491554  | 0.001  | 1               |
| SE | CDK11A   | - | chr1:1722587-1722634      | NA | -0.123 | 0.01643350428   | -0.002 | 1               |
| SE | ADAT1    | - | chr16:75618585-75618698   | NA | -0.123 | 0.009096233477  | -0.038 | 1               |
| SE | USP53    | + | chr4:119268267-119268420  | NA | -0.123 | 0.00393903467   | -0.013 | 1               |
| SE | GFM2     | - | chr5:74730259-74730398    | NA | -0.123 | 0.003000752999  | -0.027 | 0.180170117     |
| SE | POLL     | - | chr10:101582762-101582891 | NA | -0.123 | 0.001498880467  | 0.006  | 1               |
| SE | IST1     | + | chr16:71924090-71924281   | NA | -0.123 | 0.001113102966  | 0.01   | 2.26E-06        |
| SE | ANGEL1   | - | chr14:76810088-76810254   | NA | -0.124 | 0.0001146705376 | -0.008 | 1               |
| SE | POLQ     | - | chr3:121473349-121473487  | NA | -0.124 | 0.008199787959  | -0.001 | 1               |
| SE | MADD     | + | chr11:47288967-47289027   | NA | -0.124 | 0.01952163363   | 0.008  | 1               |
| SE | TJP2     | + | chr9:69251034-69251364    | NA | -0.124 | 0.03536904157   | -0.048 | 0.001909610936  |
| SE | ZMYM5    | - | chr13:19838699-19838985   | NA | -0.124 | 0.0002257543833 | 0.023  | 1               |
| SE | PPCDC    | + | chr15:75043440-75043536   | NA | -0.124 | 0.03357411761   | 0.005  | 1               |
| SE | PAM      | + | chr5:102974115-102974436  | NA | -0.124 | 0.001610289966  | 0.028  | 1               |
| SE | MRRF     | + | chr9:122286038-122286166  | NA | -0.124 | 0.004509801696  | 0.066  | 0.1442757745    |
| SE | KIAA0753 | - | chr17:6611918-6612148     | NA | -0.124 | 0.006509517624  | 0.006  | 1               |
| SE | SNHG5    | - | chr6:85677794-85677868    | NA | -0.124 | 3.33E-08        | -0.136 | 0               |
| SE | LAS1L    | - | chrX:65528259-65528369    | NA | -0.125 | 2.61E-07        | -0.023 | 1.65E-10        |
| SE | USP28    | - | chr11:113830866-113830946 | NA | -0.125 | 0.0296972396    | -0.014 | 1               |
| SE | ALDH3A2  | + | chr17:19673150-19673275   | NA | -0.125 | 1.60E-07        | 0.041  | 1               |
| SE | RPLP0    | - | chr12:120198553-120198770 | NA | -0.125 | 0               | -0.013 | 2.05E-13        |
| SE | NUP50    | + | chr22:45170987-45171143   | NA | -0.125 | 0.000806993149  | 0.012  | 1               |
| SE | EIF2D    | - | chr1:206599462-206599612  | NA | -0.125 | 1.15E-11        | -0.089 | 0               |
| SE | PAM      | + | chr5:103025133-103025334  | NA | -0.125 | 0.001027895403  | 0.005  | 1               |
| SE | PDPR     | + | chr16:70131301-70131419   | NA | -0.126 | 0.03206756502   | 0.079  | 1               |
| SE | IMMP1L   | - | chr11:31456259-31456386   | NA | -0.126 | 0.01808880893   | -0.02  | 1               |
| SE | TMEM237  | - | chr2:201634803-201634893  | NA | -0.126 | 8.05E-09        | 0.008  | 1               |
| SE | PHF5A    | - | chr22:41468019-41468147   | NA | -0.127 | 8.80E-05        | -0.031 | 2.63E-07        |
| SE | CBLB     | - | chr3:105681478-105681610  | NA | -0.127 | 0.001497862413  | -0.031 | 1               |
| SE | HNRNPR   | - | chr1:23340851-23341020    | NA | -0.127 | 6.33E-05        | -0.002 | 1               |
| SE | TPRKB    | - | chr2:73734527-73734591    | NA | -0.127 | 0.001712917184  | 0.003  | 1               |
| SE | TBL1X    | + | chrX:9534899-9535034      | NA | -0.128 | 0.0006349605137 | 0.005  | 1               |
| SE | PHF20L1  | + | chr8:132825034-132825157  | NA | -0.128 | 0.0005152712216 | 0.036  | 0.07618515052   |
| SE | SNHG5    | - | chr6:85677794-85677899    | NA | -0.128 | 7.18E-08        | -0.147 | 9.07E-14        |
| SE | SNAP23   | + | chr15:42529674-42529819   | NA | -0.129 | 0.0001857822036 | 0.001  | 1               |
| SE | HDLBP    | - | chr2:241269360-241269561  | NA | -0.129 | 2.19E-07        | -0.007 | 1               |
| SE | TNIK     | - | chr3:171128713-171128878  | NA | -0.129 | 0.00168795208   | 0.006  | 1               |
| SE | THAP6    | + | chr4:75521735-75521861    | NA | -0.129 | 0.005749812137  | -0.064 | 4.17E-13        |
| SE | MORF4L1  | + | chr15:78887268-78887349   | NA | -0.129 | 0.003025881065  | -0.002 | 1               |
| SE | TCOF1    | + | chr5:150372005-150372236  | NA | -0.13  | 0.003432257142  | 0.001  | 1               |
| SE | DNMT3A   | - | chr2:25239314-25239513    | NA | -0.13  | 0.001496409421  | 0.001  | 1               |
| SE | ZCCHC11  | - | chr1:52458335-52458449    | NA | -0.13  | 0.03293364916   | 0.008  | 1               |
| SE | TRPC1    | + | chr3:142792823-142792967  | NA | -0.13  | 0.007980648665  | 0.007  | 1               |
| SE | MRPS18C  | + | chr4:83458345-83458429    | NA | -0.13  | 1.79E-06        | -0.013 | 0.2516003699    |
| SE | DENND5A  | - | chr11:9176771-9176902     | NA | -0.13  | 3.99E-12        | 0.004  | 1               |
| SE | TFDP1    | + | chr13:113631622-113631905 | NA | -0.13  | 0.01092216805   | -0.112 | 1.87E-11        |
| SE | ACTN1    | - | chr14:68878988-68879069   | NA | -0.131 | 2.38E-08        | -0.019 | 1.92E-05        |
| SE | ZNF302   | + | chr19:34679827-34679959   | NA | -0.131 | 1.32E-06        | 0.001  | 0.0002950735094 |
| SE | NQO2     | + | chr6:3002049-3002286      | NA | -0.131 | 2.94E-07        | 0.003  | 1               |
| SE | HP1BP3   | - | chr1:20780344-20780540    | NA | -0.131 | 0.0274504833    | -0.054 | 0.05102852609   |
| SE | TBC1D5   | - | chr3:17622647-17622765    | NA | -0.131 | 0.0439700115    | -0.037 | 1               |
| SE | ZMYM5    | - | chr13:19837655-19837821   | NA | -0.131 | 0.009523405635  | 0      | 1               |
| SE | CDK7     | + | chr5:69254601-69254669    | NA | -0.131 | 0.02599262688   | 0.061  | 1               |
| SE | GIT2     | - | chr12:109951166-109951316 | NA | -0.131 | 0.003988133396  | -0.004 | 1               |
| SE | WDR89    | - | chr14:63641298-63641407   | NA | -0.131 | 0.01313831589   | -0.002 | 1               |

|    |            |   |                           |    |        |                 |        |                 |
|----|------------|---|---------------------------|----|--------|-----------------|--------|-----------------|
| SE | C9orf85    | + | chr9:71971504-71971618    | NA | -0.131 | 0.004011400497  | -0.018 | 1               |
| SE | TAB3       | - | chrX:30842965-30843049    | NA | -0.131 | 0.0088897773    | 0.02   | 1               |
| SE | ARAP1      | - | chr11:72692752-72692785   | NA | -0.131 | 0.04752424816   | -0.018 | 0.7127745885    |
| SE | TRIM16     | - | chr17:15682860-15682951   | NA | -0.131 | 0.006132731773  | -0.144 | 0.0002239694333 |
| SE | ATG5       | - | chr6:106308363-106308491  | NA | -0.132 | 0.009067089434  | -0.067 | 0.0003631199993 |
| SE | THOC5      | - | chr22:29531077-29531110   | NA | -0.132 | 2.46E-05        | -0.013 | 0.3101146591    |
| SE | DLGAP5     | - | chr14:55148593-55148684   | NA | -0.132 | 3.50E-10        | 0.039  | 1               |
| SE | MICAL1     | - | chr6:109447874-109447963  | NA | -0.132 | 0.01210955425   | -0.046 | 2.05E-13        |
| SE | KANSL2     | - | chr12:48679035-48679150   | NA | -0.132 | 0.0006849077524 | -0.031 | 1               |
| SE | FAM192A    | - | chr16:57174619-57174688   | NA | -0.132 | 7.91E-09        | -0.017 | 2.03E-05        |
| SE | ZNF37BP    | - | chr10:42525539-42525660   | NA | -0.132 | 0.001151705187  | 0.084  | 1               |
| SE | RP11-87H9. | + | chr9:41008880-41009006    | NA | -0.132 | 0.0006889078724 | -0.016 | 1               |
| SE | RSU1       | - | chr10:16816972-16817084   | NA | -0.133 | 1.64E-07        | -0.025 | 0.7525329271    |
| SE | AASDH      | - | chr4:56345126-56345290    | NA | -0.133 | 0.004080108744  | -0.046 | 1               |
| SE | STARD4     | - | chr5:111501961-111502088  | NA | -0.133 | 0.02770700481   | 0.013  | 1               |
| SE | STK40      | - | chr1:36367847-36368084    | NA | -0.133 | 0.008231467309  | -0.032 | 0.0006167935661 |
| SE | TLE1       | - | chr9:81652213-81652288    | NA | -0.133 | 0.02872169449   | -0.015 | 1               |
| SE | KIAA1715   | - | chr2:175994133-175994280  | NA | -0.134 | 5.77E-09        | -0.002 | 1               |
| SE | LRP8       | - | chr1:53257239-53257464    | NA | -0.134 | 3.98E-08        | 0.004  | 1               |
| SE | ZNF271P    | + | chr18:35291009-35291232   | NA | -0.134 | 0.01506849521   | -0.005 | 1               |
| SE | SPPL2A     | - | chr15:50726072-50726126   | NA | -0.135 | 0.01789049185   | -0.024 | 0.8359812358    |
| SE | ANK3       | - | chr10:60200128-60200263   | NA | -0.135 | 0.002225080387  | -0.022 | 1               |
| SE | RHNO1      | + | chr12:2885262-2885534     | NA | -0.135 | 0.0004129172434 | -0.024 | 0.04322393452   |
| SE | RBM23      | - | chr14:22905605-22905659   | NA | -0.136 | 6.52E-08        | -0.001 | 1               |
| SE | CLCN3      | + | chr4:169717791-169717867  | NA | -0.136 | 2.41E-05        | -0.022 | 0.09189064949   |
| SE | MICAL2     | + | chr11:12249183-12249246   | NA | -0.136 | 0.02165860992   | -0.015 | 1               |
| SE | SCLT1      | - | chr4:128942995-128943188  | NA | -0.136 | 0.03286776765   | -0.008 | 1               |
| SE | RPUSD3     | - | chr3:9838984-9839171      | NA | -0.136 | 0.007378662604  | -0.022 | 0.04035963457   |
| SE | CLHC1      | - | chr2:55180509-55180712    | NA | -0.136 | 0.001870402945  | 0.01   | 1               |
| SE | SETD2      | - | chr3:47080800-47081083    | NA | -0.136 | 0.004085034607  | -0.003 | 1               |
| SE | HNRNPAB    | + | chr5:178210131-178210272  | NA | -0.136 | 2.85E-13        | -0.026 | 0.221852334     |
| SE | CHPF2      | + | chr7:151236955-151237172  | NA | -0.137 | 0.0003362019884 | 0.079  | 0.2590016045    |
| SE | NTAN1      | - | chr16:15047996-15048099   | NA | -0.137 | 0.002085721271  | -0.026 | 1               |
| SE | IRAK4      | + | chr12:43772911-43772986   | NA | -0.137 | 0.01711610116   | -0.014 | 1               |
| SE | CCNC       | - | chr6:99544178-99544273    | NA | -0.138 | 1.82E-06        | 0.019  | 1.57E-09        |
| SE | ANKRD11    | - | chr16:89313316-89313589   | NA | -0.138 | 1.55E-09        | 0.002  | 1               |
| SE | ENO3       | + | chr17:4952024-4952147     | NA | -0.139 | 0.00490899262   | 0.012  | 0.4798648571    |
| SE | MRPL47     | - | chr3:179602651-179602737  | NA | -0.139 | 1.07E-12        | -0.014 | 1               |
| SE | GUF1       | + | chr4:44691665-44691799    | NA | -0.139 | 0.03109214455   | 0.023  | 1               |
| SE | ASAP1      | - | chr8:130091972-130092143  | NA | -0.139 | 0.0008506612306 | -0.032 | 0.6580130316    |
| SE | SPG7       | + | chr16:89545871-89546030   | NA | -0.139 | 1.91E-06        | 0.028  | 0               |
| SE | RPLP0      | - | chr12:120198553-120198631 | NA | -0.14  | 0               | -0.015 | 8.93E-12        |
| SE | ZMIZ1      | + | chr10:79162052-79162133   | NA | -0.14  | 0.000864542017  | -0.035 | 1               |
| SE | MFF        | + | chr2:227347225-227347384  | NA | -0.14  | 0.009275745962  | -0.084 | 6.66E-09        |
| SE | ZNF655     | + | chr7:99561887-99562494    | NA | -0.14  | 0.02620422848   | -0.114 | 0.0009465271811 |
| SE | EML1       | + | chr14:99914565-99914697   | NA | -0.141 | 0.01019963675   | -0.008 | 1               |
| SE | LTA4H      | - | chr12:96003837-96003981   | NA | -0.141 | 0.02140667551   | -0.038 | 0.5455110131    |
| SE | YWHAZ      | - | chr8:100951928-100952125  | NA | -0.141 | 1.20E-07        | 0.009  | 1               |
| SE | FUZ        | - | chr19:49812446-49812736   | NA | -0.142 | 0.001793405002  | -0.067 | 0.01336889041   |
| SE | C12orf4    | - | chr12:4517060-4517189     | NA | -0.142 | 0.0001872045859 | 0.005  | 1               |
| SE | BTN2A1     | + | chr6:26458606-26458718    | NA | -0.142 | 0.001159125414  | -0.023 | 0.007301125562  |
| SE | POC1B      | - | chr12:89425160-89425379   | NA | -0.142 | 5.41E-06        | 0.037  | 0.01190586918   |
| SE | EYA3       | - | chr1:28027788-28027926    | NA | -0.142 | 0.007720184609  | -0.019 | 1               |
| SE | CHTF8      | - | chr16:69121052-69121170   | NA | -0.142 | 2.57E-05        | -0.055 | 1               |
| SE | FAM210A    | - | chr18:13671861-13671973   | NA | -0.142 | 0.000175916401  | -0.016 | 1               |
| SE | FAM120C    | - | chrX:54085714-54085916    | NA | -0.142 | 0.005509184309  | 0.022  | 1               |
| SE | LETMD1     | + | chr12:51058005-51058128   | NA | -0.143 | 0.03029140932   | 0.009  | 1               |
| SE | CYP20A1    | + | chr2:203272669-203272748  | NA | -0.143 | 0.003905914187  | -0.047 | 0.09191980553   |
| SE | CHTF8      | - | chr16:69120106-69120208   | NA | -0.143 | 0.04354642454   | 0.026  | 1               |
| SE | COPG1      | + | chr3:129250681-129250894  | NA | -0.143 | 0.002239049543  | -0.027 | 0.60943402      |
| SE | C2orf74    | + | chr2:61162841-61162955    | NA | -0.143 | 0               | -0.016 | 1               |
| SE | HEATR6     | - | chr17:60073745-60073886   | NA | -0.144 | 0.000218129136  | 0.006  | 1               |
| SE | SLC25A40   | - | chr7:87860071-87860169    | NA | -0.144 | 0.02566581821   | -0.006 | 1               |

|    |          |   |                           |    |        |                 |        |                 |
|----|----------|---|---------------------------|----|--------|-----------------|--------|-----------------|
| SE | CARD8    | - | chr19:48218870-48219012   | NA | -0.144 | 0.006207750042  | -0.041 | 0.5131149699    |
| SE | PRUNE    | + | chr1:151024610-151024795  | NA | -0.144 | 0.02759566031   | -0.01  | 1               |
| SE | FAM200B  | + | chr4:15684885-15684959    | NA | -0.144 | 0.009167109226  | -0.003 | 1               |
| SE | ABCD4    | - | chr14:74299547-74299675   | NA | -0.145 | 0.001061603759  | 0.004  | 1               |
| SE | MACF1    | + | chr1:39465094-39465112    | NA | -0.145 | 5.30E-07        | -0.008 | 1               |
| SE | ZGRF1    | - | chr4:112623816-112623876  | NA | -0.145 | 0.008185219315  | -0.096 | 1               |
| SE | NUDT22   | + | chr11:64229849-64230070   | NA | -0.145 | 0.000222018372  | -0.039 | 0.007436051979  |
| SE | C5orf45  | - | chr5:179851242-179851424  | NA | -0.145 | 9.74E-05        | 0.004  | 0.5676840759    |
| SE | KCNAB3   | - | chr17:7925096-7925183     | NA | -0.145 | 0.003016887814  | -0.01  | 1               |
| SE | ARHGEF12 | + | chr11:120429711-120429831 | NA | -0.145 | 1.69E-05        | -0.021 | 1               |
| SE | SOX9-AS1 | - | chr17:72074548-72076733   | NA | -0.145 | 0.0002651228345 | -0.027 | 1               |
| SE | VEZT     | + | chr12:95256549-95256622   | NA | -0.146 | 0.04376813577   | -0.025 | 1               |
| SE | FAM35A   | + | chr10:87175888-87176095   | NA | -0.146 | 0.00447617254   | -0.045 | 1               |
| SE | ZBTB38   | + | chr3:141438242-141438365  | NA | -0.146 | 0.04507777634   | -0.035 | 1               |
| SE | ZNF506   | - | chr19:19793833-19795660   | NA | -0.147 | 0.001824574982  | -0.001 | 1               |
| SE | ATP6V1B1 | + | chr2:70963161-70963312    | NA | -0.147 | 0.001312492684  | -0.061 | 1               |
| SE | TRIM5    | - | chr11:5665980-5666081     | NA | -0.147 | 9.07E-05        | -0.016 | 1               |
| SE | TET2     | + | chr4:105241338-105241429  | NA | -0.147 | 0.005143745186  | 0.001  | 1               |
| SE | DLG3     | + | chrX:70497179-70497221    | NA | -0.148 | 0.006943205476  | 0      | 1               |
| SE | YAP1     | + | chr11:102209516-102209564 | NA | -0.148 | 0.001899552138  | -0.004 | 1               |
| SE | SLC50A1  | + | chr1:155137578-155137722  | NA | -0.148 | 0.0006659499029 | -0.032 | 0.3558783218    |
| SE | TPT1-AS1 | + | chr13:45390757-45390902   | NA | -0.148 | 1.99E-05        | -0.042 | 1               |
| SE | IQCB1    | - | chr3:121799195-121799374  | NA | -0.148 | 1.16E-05        | -0.023 | 1               |
| SE | ZDHHC17  | + | chr12:76821057-76821167   | NA | -0.148 | 0.002782691887  | -0.003 | 1               |
| SE | SH3YL1   | - | chr2:256206-256690        | NA | -0.149 | 0.0128107561    | 0.035  | 0.3725291074    |
| SE | LETMD1   | + | chr12:51058074-51058128   | NA | -0.149 | 0.0290614872    | 0.007  | 1               |
| SE | MACF1    | + | chr1:39427960-39428287    | NA | -0.149 | 1.08E-08        | -0.139 | 0               |
| SE | TMEM63B  | + | chr6:44135327-44135366    | NA | -0.149 | 2.00E-05        | -0.244 | 0               |
| SE | C5orf22  | + | chr5:31548489-31548687    | NA | -0.15  | 9.78E-06        | 0.001  | 1               |
| SE | ULBP2    | + | chr6:149947319-149947451  | NA | -0.15  | 0.005873187661  | -0.067 | 0.4059025373    |
| SE | ZSWIM7   | - | chr17:15986799-15986886   | NA | -0.15  | 0.003676103307  | 0.006  | 0.2490285615    |
| SE | BRD9     | - | chr5:868606-868804        | NA | -0.151 | 0               | 0.002  | 1               |
| SE | ST3GAL6  | + | chr3:98756368-98756540    | NA | -0.151 | 0.02805536072   | 0.051  | 1               |
| SE | RPAIN    | + | chr17:5425970-5426299     | NA | -0.151 | 0.00352321067   | -0.074 | 1.17E-05        |
| SE | CRIM1    | + | chr2:36537351-36537546    | NA | -0.151 | 1.02E-08        | 0.011  | 1               |
| SE | RHNO1    | + | chr12:2885282-2885492     | NA | -0.151 | 0.0005058911378 | -0.031 | 0.04539760873   |
| SE | C11orf80 | + | chr11:66822563-66822674   | NA | -0.151 | 0.02626010702   | -0.07  | 1               |
| SE | DHODH    | + | chr16:72021123-72021311   | NA | -0.152 | 0.00832100594   | -0.006 | 1               |
| SE | MPDZ     | - | chr9:13115247-13115334    | NA | -0.152 | 0.0002389659815 | -0.004 | 1               |
| SE | PRKAB1   | + | chr12:119671494-119671668 | NA | -0.152 | 0.007309215227  | -0.006 | 1               |
| SE | ACOX1    | - | chr17:75973624-75973785   | NA | -0.152 | 0.04320406396   | 0.01   | 0.03035785603   |
| SE | ZNF611   | - | chr19:52711206-52711304   | NA | -0.152 | 0.02423789603   | 0.019  | 1               |
| SE | FIS1     | - | chr7:101244006-101244139  | NA | -0.152 | 0               | -0.018 | 3.15E-14        |
| SE | CLEC2D   | + | chr12:9692827-9693948     | NA | -0.153 | 0.0009874780662 | -0.004 | 1               |
| SE | BLOC1S6  | + | chr15:45592134-45592276   | NA | -0.153 | 0.0001872045859 | -0.074 | 2.62E-11        |
| SE | ZNF680   | - | chr7:64560945-64561273    | NA | -0.153 | 0.04800831293   | 0.003  | 1               |
| SE | ZC3H14   | + | chr14:88601923-88602083   | NA | -0.154 | 0.04519826484   | -0.002 | 1               |
| SE | INTS4    | - | chr11:77910969-77911152   | NA | -0.154 | 0.0009230389767 | 0.012  | 0.00310164235   |
| SE | GUF1     | + | chr4:44690716-44690860    | NA | -0.155 | 0.04593373253   | 0.019  | 1               |
| SE | SPRY1    | + | chr4:123397610-123397856  | NA | -0.155 | 0.0008703111406 | -0.013 | 1               |
| SE | POLL     | - | chr10:101584601-101584919 | NA | -0.155 | 0.0001700015266 | -0.006 | 1               |
| SE | NARFL    | - | chr16:740021-740103       | NA | -0.156 | 6.49E-08        | 0.007  | 1               |
| SE | CENPK    | - | chr5:65551105-65551242    | NA | -0.156 | 0               | -0.01  | 1               |
| SE | LYPLAL1  | + | chr1:219193081-219193251  | NA | -0.156 | 0.001062493224  | 0.006  | 1               |
| SE | ZNF260   | - | chr19:36525154-36525373   | NA | -0.156 | 0.001648135725  | 0.005  | 1               |
| SE | ATG10    | + | chr5:82164398-82164537    | NA | -0.157 | 0.01125548831   | -0.05  | 0.005542284501  |
| SE | THAP5    | - | chr7:108565829-108566022  | NA | -0.157 | 0.0005452233171 | -0.036 | 0.007207114976  |
| SE | UROS     | - | chr10:125789282-125789528 | NA | -0.157 | 0.01755232888   | 0.003  | 1               |
| SE | STK40    | - | chr1:36367851-36368084    | NA | -0.157 | 0.007647461604  | -0.039 | 0.0001717830389 |
| SE | PATZ1    | - | chr22:31328786-31328859   | NA | -0.158 | 0.001028859064  | -0.087 | 9.07E-11        |
| SE | ASCC2    | - | chr22:29825621-29825780   | NA | -0.158 | 0.0005291269653 | -0.017 | 1               |
| SE | GRB10    | - | chr7:50732271-50732368    | NA | -0.158 | 0.002538626055  | 0.056  | 1               |
| SE | FRG1     | + | chr4:189955036-189955151  | NA | -0.158 | 1.68E-08        | 0.02   | 0.7399231888    |

|    |            |   |                           |    |        |                 |        |                 |   |
|----|------------|---|---------------------------|----|--------|-----------------|--------|-----------------|---|
| SE | DIEXF      | + | chr1:209842582-209842695  | NA | -0.158 | 0.02912579184   | -0.029 |                 | 1 |
| SE | PTPRA      | + | chr20:2947981-2948024     | NA | -0.158 | 0.004696244476  | -0.033 | 0.970570909     |   |
| SE | TRPC1      | + | chr3:142791018-142791158  | NA | -0.158 | 0.002527404038  | -0.031 |                 | 1 |
| SE | FANCA      | - | chr16:89758576-89758705   | NA | -0.158 | 0.03898426062   | -0.005 |                 | 1 |
| SE | RFFL       | - | chr17:35021370-35021781   | NA | -0.159 | 8.79E-05        | 0.031  | 0.5929753256    |   |
| SE | MYH14      | + | chr19:50224153-50224177   | NA | -0.159 | 0.003134453167  | 0.054  |                 | 1 |
| SE | CHURC1-FM  | + | chr14:64926006-64926080   | NA | -0.159 | 8.36E-08        | 0.001  |                 | 1 |
| SE | MGEA5      | - | chr10:101793912-101793998 | NA | -0.159 | 4.00E-13        | -0.022 | 0.0008377962418 |   |
| SE | ZHX3       | - | chr20:41213733-41213899   | NA | -0.16  | 4.68E-06        | -0.007 |                 | 1 |
| SE | KBTBD3     | - | chr11:106076506-106076707 | NA | -0.16  | 0.007742020846  | 0.01   |                 | 1 |
| SE | MAP4K4     | + | chr2:101871493-101871685  | NA | -0.161 | 7.79E-08        | -0.071 | 4.82E-06        |   |
| SE | MBD1       | - | chr18:50273333-50273426   | NA | -0.161 | 0.01539580262   | -0.094 | 8.44E-06        |   |
| SE | RAB26      | + | chr16:2151129-2151315     | NA | -0.161 | 0.002964538658  | -0.008 |                 | 1 |
| SE | BRPF3      | + | chr6:36225266-36225364    | NA | -0.162 | 0.03182618393   | -0.031 |                 | 1 |
| SE | LPIN1      | + | chr2:11776085-11776193    | NA | -0.162 | 0.0003811031107 | 0.025  |                 | 1 |
| SE | APOM       | + | chr6:31656471-31656626    | NA | -0.162 | 0.0009638969816 | -0.003 |                 | 1 |
| SE | SLC4A7     | - | chr3:27409355-27409530    | NA | -0.163 | 2.31E-08        | -0.063 |                 | 1 |
| SE | SLC35D2    | - | chr9:96336716-96336784    | NA | -0.163 | 0.0005475375873 | -0.004 |                 | 1 |
| SE | FIP1L1     | + | chr4:53391429-53391498    | NA | -0.163 | 0.004672475626  | 0.04   | 0.5459772561    |   |
| SE | FAM120C    | - | chrX:54087754-54087964    | NA | -0.163 | 0.002895587267  | 0.016  |                 | 1 |
| SE | ZC3H14     | + | chr14:88596733-88596808   | NA | -0.164 | 0.002711949392  | -0.03  |                 | 1 |
| SE | ALMS1      | + | chr2:73550266-73550437    | NA | -0.164 | 0.0009874780662 | -0.029 |                 | 1 |
| SE | RPAIN      | + | chr17:5425970-5426082     | NA | -0.164 | 0.003868841766  | -0.073 | 0.0003832155032 |   |
| SE | C11orf74   | + | chr11:36636050-36636117   | NA | -0.164 | 0.000648428039  | 0.02   |                 | 1 |
| SE | LPCAT4     | - | chr15:34361399-34361532   | NA | -0.164 | 0.0001905212064 | -0.037 | 5.01E-05        |   |
| SE | UBE2F      | + | chr2:237987962-237987992  | NA | -0.164 | 0.002623975802  | -0.014 |                 | 1 |
| SE | TMEM222    | + | chr1:27330984-27331137    | NA | -0.165 | 0.001213990935  | -0.004 |                 | 1 |
| SE | RP11-87H9  | + | chr9:40993252-40993434    | NA | -0.165 | 0.006454968809  | 0.046  |                 | 1 |
| SE | NDUFAF7    | + | chr2:37242634-37242693    | NA | -0.166 | 0.01724334818   | 0.029  |                 | 1 |
| SE | BCLAF1     | - | chr6:136269140-136269303  | NA | -0.166 | 3.04E-05        | 0.01   | 0.1681799919    |   |
| SE | MEF2A      | + | chr15:99620890-99621080   | NA | -0.166 | 0.03836748222   | -0.058 |                 | 1 |
| SE | TRDMT1     | - | chr10:17161482-17161548   | NA | -0.166 | 0.01480028911   | -0.024 |                 | 1 |
| SE | ESYT2      | - | chr7:158752780-158752843  | NA | -0.166 | 0               | -0.025 | 3.10E-07        |   |
| SE | RPAIN      | + | chr17:5425970-5428211     | NA | -0.166 | 0.0001203924305 | -0.044 | 1.16E-05        |   |
| SE | NR2C2AP    | - | chr19:19202469-19202575   | NA | -0.166 | 3.85E-05        | -0.105 | 4.87E-10        |   |
| SE | RANGAP1    | - | chr22:41284900-41285153   | NA | -0.167 | 0.002089000179  | -0.001 |                 | 1 |
| SE | LIG4       | - | chr13:108214537-108214610 | NA | -0.167 | 0.0005007711641 | 0.007  |                 | 1 |
| SE | ALOX12-AS  | - | chr17:7010058-7010137     | NA | -0.167 | 0.005410559041  | -0.008 |                 | 1 |
| SE | TTC38      | + | chr22:46281970-46282151   | NA | -0.168 | 0.008685505951  | 0.002  |                 | 1 |
| SE | DCUN1D4    | + | chr4:51908919-51908975    | NA | -0.168 | 0.0005258881182 | 0.026  |                 | 1 |
| SE | ABCD4      | - | chr14:74297638-74298069   | NA | -0.168 | 0.0005076552538 | 0.019  |                 | 1 |
| SE | LYPLAL1    | + | chr1:219193129-219193251  | NA | -0.168 | 0.001177240212  | 0.002  |                 | 1 |
| SE | KIAA0195   | + | chr17:75492238-75492337   | NA | -0.168 | 0.007872163172  | -0.01  |                 | 1 |
| SE | LMAN2L     | - | chr2:96737136-96737217    | NA | -0.169 | 1.72E-06        | 0.008  |                 | 1 |
| SE | SETD5      | + | chr3:9434044-9434181      | NA | -0.169 | 0.03496582331   | 0.066  |                 | 1 |
| SE | IQCB1      | - | chr3:121828469-121828632  | NA | -0.169 | 3.04E-10        | -0.01  |                 | 1 |
| SE | ACAT1      | + | chr11:108129102-108129201 | NA | -0.17  | 0.04997449951   | 0.045  |                 | 1 |
| SE | PEX1       | - | chr7:92509328-92509411    | NA | -0.17  | 0.001359664745  | -0.08  | 0.03926674578   |   |
| SE | ITGB3BP    | - | chr1:63510064-63510181    | NA | -0.17  | 0               | -0.002 |                 | 1 |
| SE | NCOA1      | + | chr2:24768078-24768135    | NA | -0.171 | 0.01318176908   | -0.031 |                 | 1 |
| SE | COA1       | - | chr7:43650492-43650712    | NA | -0.171 | 0               | -0.041 |                 | 0 |
| SE | ORC2       | - | chr2:200926767-200926900  | NA | -0.171 | 0.0003867219596 | -0.005 |                 | 1 |
| SE | ATPAF1     | - | chr1:46645160-46645256    | NA | -0.171 | 0.0007654461304 | -0.019 |                 | 1 |
| SE | FAM192A    | - | chr16:57175538-57175700   | NA | -0.171 | 0.02184055867   | 0.016  |                 | 1 |
| SE | RP11-156P1 | - | chr17:47033277-47033381   | NA | -0.171 | 0.02472987573   | -0.099 |                 | 1 |
| SE | YEATS4     | + | chr12:69365789-69365884   | NA | -0.172 | 0.0001418200435 | 0.005  |                 | 1 |
| SE | DNM2       | + | chr19:10808568-10808580   | NA | -0.173 | 6.70E-09        | -0.125 | 3.49E-05        |   |
| SE | CNTRL      | + | chr9:121171407-121171548  | NA | -0.173 | 0.001925312558  | -0.017 |                 | 1 |
| SE | FBXO38     | + | chr5:148427212-148427722  | NA | -0.173 | 0.00170797872   | 0.099  | 1.15E-07        |   |
| SE | ACSF3      | + | chr16:89114338-89114487   | NA | -0.173 | 0.03184982237   | -0.074 | 2.35E-08        |   |
| SE | CEP63      | + | chr3:134547334-134547472  | NA | -0.173 | 6.22E-05        | 0.025  | 0.1996070004    |   |
| SE | AC091729.9 | + | chr7:1162351-1162543      | NA | -0.173 | 0.04292658489   | -0.073 |                 | 1 |
| SE | PVT1       | + | chr8:127983903-127984204  | NA | -0.173 | 1.02E-05        | 0.007  |                 | 1 |

|    |            |   |                           |    |        |                 |        |                 |   |
|----|------------|---|---------------------------|----|--------|-----------------|--------|-----------------|---|
| SE | POC1A      | - | chr3:52096568-52096712    | NA | -0.174 | 0.002778487747  | -0.044 |                 | 1 |
| SE | CFAP44     | - | chr3:113333405-113333583  | NA | -0.174 | 0.02483827348   | -0.048 |                 | 1 |
| SE | IGF2BP2    | - | chr3:185672540-185672669  | NA | -0.175 | 0.0001714835135 | -0.115 |                 | 1 |
| SE | ORC2       | - | chr2:200925835-200925932  | NA | -0.175 | 0.0003271679084 | -0.003 |                 | 1 |
| SE | TTC3       | + | chr21:37094004-37094090   | NA | -0.175 | 1.50E-06        | -0.003 |                 | 1 |
| SE | PATZ1      | - | chr22:31328786-31328924   | NA | -0.176 | 6.08E-05        | -0.059 | 1.94E-06        |   |
| SE | SETX       | - | chr9:132269402-132269489  | NA | -0.176 | 0.0006607809519 | 0      |                 | 1 |
| SE | FBXO38     | + | chr5:148427212-148427947  | NA | -0.176 | 0.000531989971  | 0.098  | 2.29E-08        |   |
| SE | BLOC1S5    | - | chr6:8027206-8027399      | NA | -0.176 | 0.02561488547   | -0.021 |                 | 1 |
| SE | DHX33      | - | chr17:5463528-5463689     | NA | -0.177 | 3.95E-06        | -0.064 | 0.05454204889   |   |
| SE | DNAJC13    | + | chr3:132484362-132484493  | NA | -0.177 | 1.90E-07        | -0.002 |                 | 1 |
| SE | SLC20A2    | - | chr8:42535171-42535335    | NA | -0.177 | 0.04253479721   | 0.069  | 0.5310320296    |   |
| SE | TNRC18     | - | chr7:5361593-5361722      | NA | -0.177 | 0.0001631757984 | -0.114 | 1.57E-09        |   |
| SE | ZNF655     | + | chr7:99563193-99563266    | NA | -0.177 | 0.03398103924   | 0.032  | 0.0006725046737 |   |
| SE | IGF2BP3    | - | chr7:23361533-23361597    | NA | -0.178 | 0.0001511590587 | -0.022 |                 | 1 |
| SE | GAPVD1     | + | chr9:125335171-125335252  | NA | -0.178 | 0.001005069542  | 0.038  | 0.007320527099  |   |
| SE | TCF25      | + | chr16:89878460-89878627   | NA | -0.179 | 0               | 0.001  | 0.3228993575    |   |
| SE | C11orf74   | + | chr11:36633283-36633438   | NA | -0.18  | 0.001232514114  | 0.021  |                 | 1 |
| SE | IQCB1      | - | chr3:121795456-121795566  | NA | -0.18  | 6.62E-06        | -0.03  |                 | 1 |
| SE | PARPBP     | + | chr12:102151569-102151800 | NA | -0.18  | 2.79E-09        | 0.032  |                 | 1 |
| SE | MTMR9LP    | - | chr1:32234035-32234301    | NA | -0.18  | 0.04339536956   | 0.051  |                 | 1 |
| SE | ERLEC1     | + | chr2:53808298-53808460    | NA | -0.181 | 4.53E-11        | 0.027  | 0.1371881116    |   |
| SE | SBF2       | - | chr11:9828125-9828221     | NA | -0.181 | 0.001230254427  | -0.002 |                 | 1 |
| SE | HNRNPD     | - | chr4:82356536-82356683    | NA | -0.181 | 1.83E-06        | 0.001  |                 | 1 |
| SE | ZNF468     | - | chr19:52853871-52854107   | NA | -0.181 | 0.01962932789   | 0.03   |                 | 1 |
| SE | TPRKB      | - | chr2:73734527-73734588    | NA | -0.182 | 0.0003277096277 | 0.006  |                 | 1 |
| SE | C5orf45    | - | chr5:179853196-179853276  | NA | -0.182 | 0.0005585912991 | 0.016  | 0.03078998763   |   |
| SE | CXorf23    | - | chrX:19935808-19935898    | NA | -0.182 | 0.0007224857652 | -0.004 |                 | 1 |
| SE | PVT1       | + | chr8:128099369-128099573  | NA | -0.182 | 2.16E-05        | -0.007 |                 | 1 |
| SE | MON2       | + | chr12:62470700-62470778   | NA | -0.183 | 2.20E-05        | 0.058  |                 | 1 |
| SE | DLG1       | - | chr3:197161639-197161738  | NA | -0.183 | 0.01173470505   | -0.024 |                 | 1 |
| SE | PLGRKT     | - | chr9:5381862-5382031      | NA | -0.183 | 0.001850489502  | -0.115 |                 | 1 |
| SE | NQO2       | + | chr6:3004494-3004651      | NA | -0.183 | 2.89E-14        | 0.014  | 0.8136727638    |   |
| SE | RBCK1      | + | chr20:417219-417342       | NA | -0.183 | 7.29E-07        | 0      |                 | 1 |
| SE | SEC31A     | - | chr4:82861630-82861708    | NA | -0.183 | 2.27E-08        | -0.004 |                 | 1 |
| SE | METTL6     | - | chr3:15414729-15414914    | NA | -0.183 | 0.01601132017   | 0.083  | 0.0001102242049 |   |
| SE | AGPAT4     | - | chr6:161165576-161165713  | NA | -0.184 | 1.73E-06        | 0.007  | 0.004403524414  |   |
| SE | SNX14      | - | chr6:85565331-85565419    | NA | -0.184 | 0.001898049618  | 0.037  |                 | 1 |
| SE | MFF        | + | chr2:227328677-227330846  | NA | -0.184 | 0.008685505951  | 0.09   | 0.002578297385  |   |
| SE | ZSWIM7     | - | chr17:15986799-15986892   | NA | -0.184 | 0.0004348505466 | 0.011  | 0.0647562408    |   |
| SE | APOPT1     | + | chr14:103579370-103579491 | NA | -0.184 | 0.00718773629   | -0.082 | 4.33E-05        |   |
| SE | FAM114A2   | - | chr5:154038292-154038434  | NA | -0.185 | 0.0001340157811 | -0.01  |                 | 1 |
| SE | DCAF10     | + | chr9:37842088-37842286    | NA | -0.185 | 4.77E-06        | 0.013  |                 | 1 |
| SE | ATG4D      | + | chr19:10546838-10547253   | NA | -0.185 | 0.009304957146  | -0.046 |                 | 1 |
| SE | DNAJC14    | - | chr12:55829488-55829636   | NA | -0.185 | 0.0009943830497 | 0.088  | 0.02081818664   |   |
| SE | HNRNPDL    | - | chr4:82425562-82425667    | NA | -0.185 | 3.12E-07        | 0.003  |                 | 1 |
| SE | RP11-421L2 | + | chr1:101083460-101083574  | NA | -0.185 | 0.001013602768  | -0.114 | 0.0001433071412 |   |
| SE | DNAJC5     | + | chr20:63931108-63931182   | NA | -0.186 | 0.04246695346   | -0.006 |                 | 1 |
| SE | PLD3       | + | chr19:40365661-40365930   | NA | -0.186 | 0.0290614872    | -0.166 | 7.56E-13        |   |
| SE | ACAD10     | + | chr12:111729805-111729956 | NA | -0.186 | 0.04957365061   | -0.046 |                 | 1 |
| SE | TBC1D5     | - | chr3:17428449-17428519    | NA | -0.186 | 6.16E-10        | -0.028 |                 | 1 |
| SE | RGS5       | - | chr1:163248529-163248598  | NA | -0.186 | 0.03328327983   | -0.041 |                 | 1 |
| SE | RPS27      | + | chr1:153990913-153991034  | NA | -0.186 | 0.04298664594   | 0.003  | 3.43E-11        |   |
| SE | GMIP       | - | chr19:19634506-19634703   | NA | -0.187 | 0.02076062402   | -0.01  | 0.8869189082    |   |
| SE | TJP2       | + | chr9:69249374-69249485    | NA | -0.187 | 0.005796639247  | -0.193 | 5.22E-13        |   |
| SE | ZC3H13     | - | chr13:46051931-46051989   | NA | -0.187 | 0.01151561822   | 0.053  |                 | 1 |
| SE | SLC35B3    | - | chr6:8417401-8417494      | NA | -0.187 | 0.00405415197   | -0.04  | 2.87E-09        |   |
| SE | POLL       | - | chr10:101584601-101584919 | NA | -0.187 | 4.65E-05        | -0.058 | 0.009125994487  |   |
| SE | RNASEH1-A  | + | chr2:3559447-3559729      | NA | -0.187 | 0.0001717190751 | -0.018 |                 | 1 |
| SE | CDKL3      | - | chr5:134308573-134308727  | NA | -0.188 | 0.0127687169    | 0.024  |                 | 1 |
| SE | UFD1L      | - | chr22:19451877-19452000   | NA | -0.188 | 0.04996473423   | 0.005  |                 | 1 |
| SE | IFT43      | + | chr14:76076596-76076691   | NA | -0.188 | 0.01764911282   | -0.115 |                 | 1 |
| SE | IGF2BP3    | - | chr7:23361533-23361597    | NA | -0.188 | 3.26E-05        | 0.025  |                 | 1 |

|    |           |   |                           |    |        |                 |        |                 |
|----|-----------|---|---------------------------|----|--------|-----------------|--------|-----------------|
| SE | SYTL2     | - | chr11:85711112-85711232   | NA | -0.188 | 0.04030865465   | -0.046 | 1               |
| SE | ZNF343    | - | chr20:2486640-2486763     | NA | -0.189 | 0.01973132719   | -0.152 | 0.04312643186   |
| SE | RBFOX2    | - | chr22:35836319-35836439   | NA | -0.189 | 1.49E-07        | -0.024 | 1               |
| SE | MFF       | + | chr2:227347225-227347384  | NA | -0.189 | 0.0008205256852 | -0.031 | 0.01051332156   |
| SE | THTPA     | + | chr14:23556742-23557304   | NA | -0.189 | 0.0007750139882 | -0.086 | 0.0001347111507 |
| SE | NCOA2     | - | chr8:70144641-70144848    | NA | -0.19  | 0.0410268245    | 0.029  | 1               |
| SE | SLC16A4   | - | chr1:110378852-110379356  | NA | -0.19  | 0.0004009114888 | 0.044  | 0.002967562341  |
| SE | TRIQQ     | - | chr8:92921502-92921660    | NA | -0.19  | 0.00409329242   | -0.065 | 7.38E-05        |
| SE | SNX19     | - | chr11:130880621-130880806 | NA | -0.191 | 7.19E-09        | 0.004  | 1               |
| SE | SLC47A1   | + | chr17:19571477-19571572   | NA | -0.191 | 0.001141438719  | 0.078  | 1               |
| SE | FAM227B   | - | chr15:49589775-49590007   | NA | -0.191 | 0.002064161024  | 0.008  | 1               |
| SE | NAA16     | + | chr13:41336649-41336756   | NA | -0.191 | 0.000130332972  | -0.011 | 1               |
| SE | TLE1      | - | chr9:81652183-81652288    | NA | -0.191 | 0.01278775258   | -0.006 | 2.29E-06        |
| SE | SHARPIN   | - | chr8:144099080-144099205  | NA | -0.192 | 0.01419024747   | -0.065 | 6.52E-08        |
| SE | DDR1      | + | chr6:30895403-30895514    | NA | -0.192 | 0.01899892488   | -0.067 | 5.99E-09        |
| SE | TTLL3     | + | chr3:9833103-9833273      | NA | -0.192 | 0.0275139992    | -0.029 | 1               |
| SE | ABHD11    | - | chr7:73737220-73737360    | NA | -0.193 | 0.007980648665  | -0.114 | 0.005031905239  |
| SE | LRRCC1    | + | chr8:85123412-85123606    | NA | -0.193 | 1.49E-05        | -0.033 | 1               |
| SE | AMMECR1L  | - | chr2:127871248-127871359  | NA | -0.193 | 0.02137621621   | -0.082 | 1               |
| SE | LAMP2     | - | chrX:120439075-120439293  | NA | -0.194 | 0.000310718969  | 0.054  | 0.005295519913  |
| SE | SEPSECS   | - | chr4:25159627-25159764    | NA | -0.194 | 0.006939518803  | -0.037 | 1               |
| SE | RHOT1     | + | chr17:32209349-32209445   | NA | -0.194 | 0.01725573761   | -0.032 | 0.1023117668    |
| SE | RABEPK    | + | chr9:125220538-125220700  | NA | -0.194 | 3.05E-07        | -0.034 | 0.004062852733  |
| SE | EME1      | + | chr17:50378594-50378681   | NA | -0.194 | 5.20E-09        | 0.019  | 1               |
| SE | UBE2F     | + | chr2:237994743-237994809  | NA | -0.194 | 0.001936623701  | -0.03  | 1               |
| SE | CDC14B    | - | chr9:96551795-96551872    | NA | -0.195 | 0.0005340109262 | -0.041 | 1               |
| SE | CCDC91    | + | chr12:28225794-28225861   | NA | -0.195 | 0.02409243924   | -0.04  | 1               |
| SE | ATRX      | - | chrX:77595711-77595785    | NA | -0.196 | 2.07E-11        | 0.013  | 1               |
| SE | AFMID     | + | chr17:78204827-78204900   | NA | -0.196 | 0.01185604305   | -0.023 | 1               |
| SE | C2orf76   | - | chr2:119321153-119321204  | NA | -0.196 | 4.71E-09        | 0.049  | 0.1967951618    |
| SE | TRIM16    | - | chr17:15682853-15682964   | NA | -0.196 | 0.002384579214  | -0.16  | 1               |
| SE | MLLT10    | + | chr10:21617111-21617207   | NA | -0.197 | 1.81E-08        | -0.027 | 1               |
| SE | GRB10     | - | chr7:50710874-50710990    | NA | -0.197 | 0.00375709255   | 0.02   | 1               |
| SE | CLOCK     | - | chr4:55486392-55486549    | NA | -0.197 | 0.002404395753  | -0.068 | 1               |
| SE | TACC2     | + | chr10:122143571-122143706 | NA | -0.197 | 0.003050330045  | 0.025  | 1               |
| SE | NFIC      | + | chr19:3453762-3453916     | NA | -0.197 | 0.02539293364   | -0.053 | 0.06164307927   |
| SE | AMACR     | - | chr5:33994077-33994120    | NA | -0.197 | 6.29E-08        | -0.004 | 1               |
| SE | C17orf80  | + | chr17:73242243-73242351   | NA | -0.198 | 0.03616841176   | -0.026 | 1               |
| SE | DNAJC19   | - | chr3:180986997-180987022  | NA | -0.198 | 0.009511077212  | 0.004  | 1               |
| SE | RPL17     | - | chr18:49491745-49491833   | NA | -0.198 | 1.13E-05        | 0.018  | 6.40E-07        |
| SE | KMT2E     | + | chr7:105110476-105110602  | NA | -0.199 | 3.54E-09        | -0.1   | 1.12E-09        |
| SE | C16orf93  | - | chr16:30759341-30759724   | NA | -0.199 | 0.02284834663   | -0.031 | 0.3996345431    |
| SE | MATR3     | + | chr5:139279934-139280058  | NA | -0.199 | 0.006055130299  | -0.04  | 1               |
| SE | CAMTA1    | + | chr1:6820180-6820250      | NA | -0.2   | 0.0001018934292 | -0.002 | 1               |
| SE | LCORL     | - | chr4:17886067-17886161    | NA | -0.2   | 0.03026946122   | 0.033  | 1               |
| SE | TMEM161B  | + | chr5:88285740-88285851    | NA | -0.2   | 0.02616662861   | 0.01   | 1               |
| SE | SAMD4A    | + | chr14:54737023-54737287   | NA | -0.201 | 0.000707373342  | -0.046 | 1               |
| SE | MYNN      | + | chr3:169774030-169774097  | NA | -0.201 | 0.00559327814   | -0.023 | 1               |
| SE | TCF25     | + | chr16:89908965-89909083   | NA | -0.201 | 7.43E-06        | -0.008 | 0.3340085523    |
| SE | DNAF2     | - | chr14:49628011-49628155   | NA | -0.201 | 0.000992479765  | -0.03  | 1               |
| SE | BPTF      | + | chr17:67963332-67963506   | NA | -0.201 | 0.02039831761   | 0.025  | 1               |
| SE | DPY19L3   | + | chr19:32467473-32467626   | NA | -0.201 | 0.009323277483  | -0.003 | 0.8430130572    |
| SE | PSMA3-AS1 | - | chr14:58293765-58295811   | NA | -0.201 | 4.24E-05        | -0.01  | 0.4096347567    |
| SE | SCMH1     | - | chr1:41151613-41151684    | NA | -0.202 | 0.002354333127  | -0.105 | 0.05240945867   |
| SE | SCMH1     | - | chr1:41152598-41152741    | NA | -0.202 | 0.03233185005   | -0.03  | 1               |
| SE | GLT8D1    | - | chr3:52704723-52704952    | NA | -0.203 | 0.00793029098   | 0.078  | 5.35E-05        |
| SE | OFD1      | + | chrX:13751248-13751368    | NA | -0.203 | 7.43E-06        | 0.045  | 1               |
| SE | E2F6      | - | chr2:11455341-11455474    | NA | -0.203 | 0.000284447168  | 0      | 1               |
| SE | ARNTL2    | + | chr12:27376345-27376387   | NA | -0.204 | 0.005462739449  | 0.046  | 1               |
| SE | PVR       | + | chr19:44658741-44658900   | NA | -0.204 | 0.0003788723075 | 0.015  | 1               |
| SE | RPP40     | - | chr6:4998715-4998841      | NA | -0.204 | 6.11E-06        | -0.008 | 1               |
| SE | MBD5      | + | chr2:148233244-148233395  | NA | -0.204 | 6.62E-06        | -0.003 | 1               |
| SE | DEPDC1    | - | chr1:68482045-68482897    | NA | -0.205 | 0.01524058518   | 0.213  | 7.38E-06        |

|    |            |   |                           |    |        |                 |        |                 |   |
|----|------------|---|---------------------------|----|--------|-----------------|--------|-----------------|---|
| SE | PRPSAP2    | + | chr17:18857783-18857853   | NA | -0.205 | 0.0006885416923 | -0.024 |                 | 1 |
| SE | CASC4      | + | chr15:44402886-44403054   | NA | -0.205 | 1.92E-08        | 0.03   |                 | 1 |
| SE | STRN3      | - | chr14:30929200-30929311   | NA | -0.205 | 0.0001232390093 | 0.029  |                 | 1 |
| SE | SMUG1      | - | chr12:54187818-54187905   | NA | -0.206 | 0.01517451728   | 0.003  |                 | 1 |
| SE | HUWE1      | - | chrX:53625785-53626034    | NA | -0.207 | 0.01157165107   | 0.073  |                 | 1 |
| SE | PPCDC      | + | chr15:75044385-75044514   | NA | -0.207 | 0.01663502083   | 0.018  | 0.0001170558574 |   |
| SE | ZNF180     | - | chr19:44485035-44485157   | NA | -0.207 | 0.04841923256   | 0.027  |                 | 1 |
| SE | ZNF155     | + | chr19:43990023-43990112   | NA | -0.207 | 0.0001224929477 | -0.019 |                 | 1 |
| SE | RBM26-AS1  | + | chr13:79417834-79417916   | NA | -0.207 | 0.0179359004    | -0.125 | 6.15E-14        |   |
| SE | RP11-216L1 | + | chr9:136809254-136809429  | NA | -0.207 | 0.01082847443   | -0.143 |                 | 1 |
| SE | SEPT6      | - | chrX:119625334-119625396  | NA | -0.208 | 0.0005682274055 | 0.016  | 0.3152060732    |   |
| SE | AHSA2      | + | chr2:61183546-61183662    | NA | -0.209 | 1.32E-10        | -0.004 |                 | 1 |
| SE | ZNF625-ZNI | - | chr19:12145257-12146224   | NA | -0.209 | 0.01755228438   | -0.012 |                 | 1 |
| SE | TARBP1     | - | chr1:234463836-234463934  | NA | -0.21  | 0.02650525741   | -0.168 |                 | 0 |
| SE | CLEC2D     | + | chr12:9693415-9693948     | NA | -0.21  | 0.0004320131833 | 0.023  |                 | 1 |
| SE | LTBP4      | + | chr19:40616888-40617042   | NA | -0.21  | 0.03749535962   | 0.008  |                 | 1 |
| SE | NAT9       | - | chr17:74773865-74774055   | NA | -0.21  | 0.002803673059  | -0.01  |                 | 1 |
| SE | IAH1       | + | chr2:9475986-9476039      | NA | -0.21  | 0.003840014914  | -0.004 |                 | 1 |
| SE | ATPAF2     | - | chr17:18021421-18021663   | NA | -0.21  | 0.002988281976  | 0.003  |                 | 1 |
| SE | TPGS2      | - | chr18:36805373-36805397   | NA | -0.211 | 9.62E-09        | -0.065 | 5.84E-08        |   |
| SE | GPR180     | + | chr13:94619149-94619330   | NA | -0.211 | 0.01825893441   | 0.023  |                 | 1 |
| SE | LRRK2      | + | chr12:40313971-40314173   | NA | -0.211 | 0.0001763959562 | -0.055 |                 | 1 |
| SE | FUZ        | - | chr19:49812446-49812685   | NA | -0.212 | 0.001680905192  | -0.069 |                 | 1 |
| SE | HM13       | + | chr20:31568077-31568280   | NA | -0.212 | 0.002292667923  | -0.042 |                 | 1 |
| SE | HAUS2      | + | chr15:42560781-42560870   | NA | -0.212 | 6.71E-05        | 0.055  |                 | 1 |
| SE | UBA7       | - | chr3:49809389-49809464    | NA | -0.212 | 0.03434244633   | -0.018 |                 | 1 |
| SE | ZNF814     | - | chr19:57885882-57885969   | NA | -0.212 | 0.001014446317  | -0.009 |                 | 1 |
| SE | ZCCHC8     | - | chr12:122483278-122483344 | NA | -0.213 | 0.0247351972    | 0.002  |                 | 1 |
| SE | AFTPH      | + | chr2:64579485-64579546    | NA | -0.213 | 0.002066660603  | -0.057 | 0.1318557848    |   |
| SE | THUMPD2    | - | chr2:39768900-39769093    | NA | -0.213 | 0.04630611355   | 0.012  |                 | 1 |
| SE | TRPC1      | + | chr3:142743484-142743586  | NA | -0.213 | 0.04709255475   | 0.022  |                 | 1 |
| SE | ZNF468     | - | chr19:52853871-52854126   | NA | -0.214 | 0.01228624385   | 0.054  |                 | 1 |
| SE | SNX10      | + | chr7:26357006-26357127    | NA | -0.215 | 0.0001989304633 | -0.005 |                 | 1 |
| SE | SEC24B     | + | chr4:109481676-109481781  | NA | -0.216 | 0.01392337102   | 0.014  |                 | 1 |
| SE | UBE3A      | - | chr15:25408619-25408684   | NA | -0.217 | 4.55E-05        | 0.024  |                 | 1 |
| SE | PREPL      | - | chr2:44359496-44359750    | NA | -0.217 | 0.01939041588   | 0.037  |                 | 1 |
| SE | ANAPC16    | + | chr10:72223887-72224056   | NA | -0.218 | 0               | -0.021 | 0.001566799978  |   |
| SE | ZNF655     | + | chr7:99562348-99562494    | NA | -0.219 | 0.02239654989   | -0.09  | 0.3484447737    |   |
| SE | WBP1       | + | chr2:74459477-74459562    | NA | -0.219 | 0.02421023616   | 0.041  |                 | 1 |
| SE | MVK        | + | chr12:109581394-109581550 | NA | -0.22  | 0.0001835601539 | -0.083 | 0.002006938341  |   |
| SE | DDIAS      | + | chr11:82913282-82913386   | NA | -0.22  | 9.98E-05        | -0.026 |                 | 1 |
| SE | TLL11      | - | chr9:122031722-122031856  | NA | -0.221 | 0.03455480269   | -0.047 |                 | 1 |
| SE | PCYT2      | - | chr17:81907203-81907257   | NA | -0.221 | 2.89E-14        | -0.014 | 0.03479523062   |   |
| SE | MRPL33     | + | chr2:27774423-27774530    | NA | -0.221 | 6.94E-09        | -0.038 | 0.008284518975  |   |
| SE | FAM86DP    | - | chr3:75427426-75427692    | NA | -0.221 | 8.51E-06        | -0.015 |                 | 1 |
| SE | CSPP1      | + | chr8:67172768-67172973    | NA | -0.222 | 2.44E-07        | 0.028  | 3.92E-06        |   |
| SE | TMTC4      | - | chr13:100670359-100670569 | NA | -0.222 | 1.46E-06        | 0.009  |                 | 1 |
| SE | SBF2       | - | chr11:9992414-9992543     | NA | -0.223 | 9.19E-08        | 0.008  |                 | 1 |
| SE | IMMP1L     | - | chr11:31456259-31456386   | NA | -0.223 | 3.19E-06        | -0.003 |                 | 1 |
| SE | SLC11A2    | - | chr12:51006173-51006271   | NA | -0.224 | 0.01585603976   | -0.08  |                 | 1 |
| SE | ZBTB24     | - | chr6:109476762-109476930  | NA | -0.224 | 0.0423681903    | -0.118 | 1.58E-10        |   |
| SE | LL22NC03-ε | + | chr22:22308696-22308819   | NA | -0.224 | 6.91E-05        | -0.048 |                 | 1 |
| SE | CARD8      | - | chr19:48206383-48206520   | NA | -0.225 | 0.008844746833  | -0.061 |                 | 1 |
| SE | FEZ2       | - | chr2:36560784-36560865    | NA | -0.225 | 0               | 0.197  |                 | 0 |
| SE | TCTN1      | + | chr12:110644966-110645129 | NA | -0.225 | 0.0008678622588 | -0.05  | 2.93E-05        |   |
| SE | KCTD17     | + | chr22:37060822-37060922   | NA | -0.226 | 0.00289981091   | -0.153 | 1.32E-06        |   |
| SE | KANSL2     | - | chr12:48679035-48679238   | NA | -0.226 | 0.005663637832  | -0.045 |                 | 1 |
| SE | AURKA      | - | chr20:56390555-56390665   | NA | -0.227 | 0.008722123107  | -0.063 |                 | 1 |
| SE | LPHN2      | + | chr1:81986900-81987029    | NA | -0.227 | 3.49E-10        | 0.057  | 3.85E-11        |   |
| SE | KCTD17     | + | chr22:37061538-37061629   | NA | -0.228 | 0.01385980222   | -0.128 | 4.10E-06        |   |
| SE | MANBA      | - | chr4:102753822-102753995  | NA | -0.228 | 0.0001816263906 | 0.102  |                 | 1 |
| SE | CLHC1      | - | chr2:55208625-55208710    | NA | -0.228 | 0.008763410401  | -0.025 |                 | 1 |
| SE | GINS3      | + | chr16:58395101-58395218   | NA | -0.228 | 0.0001444542877 | 0.012  |                 | 1 |

|    |            |   |                           |    |        |                 |        |                 |
|----|------------|---|---------------------------|----|--------|-----------------|--------|-----------------|
| SE | AC007566.1 | + | chr7:92462957-92463026    | NA | -0.228 | 3.06E-06        | -0.056 | 0.03277997034   |
| SE | PVT1       | + | chr8:127983903-127984204  | NA | -0.228 | 0.001136224867  | -0.089 | 1               |
| SE | CYP20A1    | + | chr2:203272645-203272748  | NA | -0.229 | 0.00918764879   | -0.077 | 0.128834362     |
| SE | C1orf52    | - | chr1:85258934-85259061    | NA | -0.229 | 0.01080748181   | 0.027  | 1               |
| SE | CRELD1     | + | chr3:9943901-9944095      | NA | -0.229 | 0.00516164134   | 0.015  | 0.05719650957   |
| SE | ERCC6L2    | + | chr9:95967458-95967625    | NA | -0.229 | 0.006683548413  | -0.004 | 0.001909610936  |
| SE | IRAK4      | + | chr12:43771219-43771365   | NA | -0.229 | 0.03571655976   | -0.131 | 1               |
| SE | MTIF2      | - | chr2:55266380-55266518    | NA | -0.23  | 0               | 0.008  | 1               |
| SE | ZC3H14     | + | chr14:88602827-88603060   | NA | -0.23  | 6.94E-06        | -0.033 | 1               |
| SE | ALDOA      | + | chr16:30065875-30065927   | NA | -0.23  | 1.22E-06        | -0.022 | 1               |
| SE | SEC61A2    | + | chr10:12167752-12167893   | NA | -0.231 | 0.002784788117  | -0.112 | 1               |
| SE | CHFR       | - | chr12:132869618-132869798 | NA | -0.231 | 0.000242143471  | -0.013 | 1               |
| SE | C11orf30   | + | chr11:76535894-76536059   | NA | -0.231 | 1.35E-06        | -0.031 | 1               |
| SE | EIF1AX     | - | chrX:20132181-20132263    | NA | -0.231 | 0.02363008235   | 0.002  | 1               |
| SE | CD27-AS1   | - | chr12:6450473-6450708     | NA | -0.232 | 0.0496313164    | -0.045 | 1               |
| SE | SCMH1      | - | chr1:41159724-41159933    | NA | -0.234 | 0.02810714143   | -0.105 | 0.1131855418    |
| SE | CAPRIN2    | - | chr12:30720810-30720915   | NA | -0.234 | 0.004393856425  | -0.068 | 0.8406346425    |
| SE | BNIP2      | - | chr15:59665349-59665442   | NA | -0.234 | 8.71E-06        | 0.005  | 1               |
| SE | CCBL1      | - | chr9:128846679-128846859  | NA | -0.234 | 0.04202003307   | -0.054 | 1               |
| SE | MBNL1      | + | chr3:152446703-152446757  | NA | -0.235 | 0.04669502336   | 0.184  | 4.02E-08        |
| SE | RNF181     | + | chr2:85596856-85596931    | NA | -0.235 | 0.01446539393   | -0.044 | 0.0007419914904 |
| SE | ATAT1      | + | chr6:30642767-30643011    | NA | -0.236 | 0.01637108017   | 0.047  | 5.33E-05        |
| SE | FAM111B    | + | chr11:59109539-59109706   | NA | -0.236 | 2.18E-09        | -0.032 | 1               |
| SE | CFAP44     | - | chr3:113409105-113409322  | NA | -0.236 | 0.003084990753  | -0.103 | 1               |
| SE | OSER1-AS1  | + | chr20:44214887-44215003   | NA | -0.236 | 0.01202849288   | 0.067  | 0.07979102748   |
| SE | MTRF1L     | - | chr6:152991184-152991321  | NA | -0.237 | 0.01806842543   | 0.032  | 1               |
| SE | LIG4       | - | chr13:108214537-108214807 | NA | -0.237 | 7.32E-05        | 0.01   | 1               |
| SE | PSMA3-AS1  | - | chr14:58273978-58274135   | NA | -0.237 | 7.74E-05        | 0.056  | 1               |
| SE | ANKHD1     | + | chr5:140472238-140472295  | NA | -0.238 | 1.18E-05        | 0.004  | 1               |
| SE | TMEM14B    | + | chr6:10749621-10749698    | NA | -0.238 | 0.0145521764    | -0.057 | 1               |
| SE | PEX5       | + | chr12:7202240-7202351     | NA | -0.238 | 0.003024317095  | -0.094 | 3.12E-07        |
| SE | JAM2       | + | chr21:25711366-25711568   | NA | -0.238 | 0               | 0      | 1               |
| SE | RP11-421L2 | + | chr1:101075394-101075716  | NA | -0.238 | 0.002624894621  | -0.026 | 1               |
| SE | THTPA      | + | chr14:23556742-23557034   | NA | -0.239 | 0.001064705924  | -0.084 | 0.0001353553277 |
| SE | TMPO       | + | chr12:98544950-98545061   | NA | -0.24  | 0.0008503980827 | -0.055 | 0.144092348     |
| SE | ZEB1       | + | chr10:31387123-31387266   | NA | -0.24  | 1.97E-06        | -0.103 | 1               |
| SE | C11orf54   | + | chr11:93741962-93742094   | NA | -0.24  | 0.01116962224   | 0.066  | 1               |
| SE | THTPA      | + | chr14:23556742-23557039   | NA | -0.24  | 0.001013018677  | -0.085 | 0.0001048126062 |
| SE | ZNF592     | + | chr15:84778182-84778312   | NA | -0.241 | 0.000908503465  | 0.005  | 1               |
| SE | HMG1       | - | chr21:39347378-39347483   | NA | -0.241 | 0.008201186754  | 0.007  | 1               |
| SE | IFT80      | - | chr3:160366092-160366152  | NA | -0.242 | 0.001172941124  | -0.057 | 0.001087131773  |
| SE | YPEL5      | + | chr2:30148244-30148305    | NA | -0.242 | 0               | 0.006  | 1               |
| SE | CCDC57     | - | chr17:82107401-82107621   | NA | -0.242 | 0.0008632009723 | -0.008 | 1               |
| SE | MYEF2      | - | chr15:48151099-48151171   | NA | -0.243 | 2.46E-08        | 0.048  | 0.02383342557   |
| SE | XRRA1      | - | chr11:74927390-74927488   | NA | -0.244 | 0.003894370242  | -0.043 | 1               |
| SE | LINC00963  | + | chr9:129502396-129503139  | NA | -0.244 | 0.02048193694   | 0.064  | 0.6082805099    |
| SE | DECR2      | + | chr16:405512-405665       | NA | -0.244 | 0.03712636787   | 0.017  | 6.96E-06        |
| SE | NFE2L1     | + | chr17:48057031-48057121   | NA | -0.245 | 1.71E-08        | -0.078 | 0               |
| SE | CENPI      | + | chrX:101099808-101100065  | NA | -0.245 | 1.04E-07        | -0.112 | 1               |
| SE | SLC25A30   | - | chr13:45411732-45411938   | NA | -0.245 | 1.54E-05        | -0.003 | 1               |
| SE | SUZ12P1    | + | chr17:30743300-30743369   | NA | -0.245 | 4.02E-05        | -0.055 | 0.8659334431    |
| SE | MAP4       | - | chr3:47867245-47867338    | NA | -0.246 | 0               | -0.129 | 0               |
| SE | LRRCC1     | + | chr8:85115099-85115275    | NA | -0.246 | 2.17E-05        | -0.047 | 0.916041012     |
| SE | CHD3       | + | chr17:7907600-7907702     | NA | -0.246 | 6.56E-08        | -0.065 | 0.08178015237   |
| SE | PUM2       | - | chr2:20278582-20278819    | NA | -0.248 | 8.29E-06        | -0.006 | 1               |
| SE | PUM2       | - | chr2:20331716-20331937    | NA | -0.248 | 8.33E-09        | 0.005  | 1               |
| SE | KLC1       | + | chr14:103684985-103685036 | NA | -0.248 | 0.01272844939   | 0.024  | 0.8524029425    |
| SE | CFAP44     | - | chr3:113344515-113344712  | NA | -0.248 | 0.001534015222  | 0.038  | 1               |
| SE | BICD1      | + | chr12:32338785-32338979   | NA | -0.249 | 0.02450190234   | 0.043  | 1               |
| SE | LZTFL1     | - | chr3:45837926-45838047    | NA | -0.249 | 0.0008526729915 | 0      | 1               |
| SE | IFI27L1    | + | chr14:94097491-94097678   | NA | -0.249 | 0.007405164285  | 0.019  | 2.87E-07        |
| SE | BCS1L      | + | chr2:218660036-218660166  | NA | -0.25  | 0.0001103973794 | -0.105 | 0.001970275672  |
| SE | PPP1R12B   | + | chr1:202443086-202443127  | NA | -0.25  | 0.03843822808   | -0.16  | 1               |



|    |            |   |                           |    |        |                 |        |                 |
|----|------------|---|---------------------------|----|--------|-----------------|--------|-----------------|
| SE | SH3PXD2A   | - | chr10:103622469-103622553 | NA | -0.25  | 0.000219648813  | -0.131 | 1               |
| SE | RPAIN      | + | chr17:5428070-5428211     | NA | -0.25  | 1.74E-07        | -0.096 | 2.67E-05        |
| SE | TRPC1      | + | chr3:142743484-142743586  | NA | -0.25  | 0.005039214886  | 0.032  | 1               |
| SE | UBAP2L     | + | chr1:154269361-154269412  | NA | -0.251 | 0.0249882848    | -0.074 | 3.44E-08        |
| SE | TIMM23B    | + | chr10:49943234-49943358   | NA | -0.251 | 0.03179732384   | 0.05   | 1               |
| SE | PHKA1      | - | chrX:72620724-72620901    | NA | -0.252 | 4.07E-05        | 0.002  | 0.0003193279855 |
| SE | HM13       | + | chr20:31568077-31568224   | NA | -0.252 | 8.23E-05        | -0.049 | 1               |
| SE | ALG2       | - | chr9:99220978-99221137    | NA | -0.252 | 0.009618423766  | 0.001  | 1               |
| SE | TRIM9      | - | chr14:51000682-51000828   | NA | -0.253 | 0.0006452214125 | -0.027 | 1               |
| SE | ATP6V1B1   | + | chr2:70963161-70963261    | NA | -0.253 | 0.0008122141714 | -0.056 | 1               |
| SE | PFKL       | + | chr21:44305799-44305935   | NA | -0.253 | 0.04584038807   | -0.031 | 1               |
| SE | OSBPL6     | + | chr2:178230425-178230513  | NA | -0.254 | 0.02472987573   | 0.023  | 1               |
| SE | KAT6A      | - | chr8:42049619-42049707    | NA | -0.254 | 0.0005347540089 | 0.17   | 1               |
| SE | ATAD2      | - | chr8:123400742-123401175  | NA | -0.254 | 0.02776636468   | -0.018 | 1               |
| SE | CDKL3      | - | chr5:134306608-134306702  | NA | -0.255 | 0.0007711754357 | -0.068 | 1               |
| SE | PRPF4B     | + | chr6:4056526-4056688      | NA | -0.255 | 6.63E-13        | 0.023  | 3.15E-14        |
| SE | RPS3A      | + | chr4:151100974-151101012  | NA | -0.255 | 0.0001633148417 | -0.005 | 0.3892592243    |
| SE | SEPT7P2    | - | chr7:45728831-45729026    | NA | -0.255 | 7.82E-11        | 0.006  | 1               |
| SE | RABEPK     | + | chr9:125213369-125213522  | NA | -0.256 | 2.92E-10        | -0.055 | 1.46E-05        |
| SE | TMPO       | + | chr12:98544441-98544537   | NA | -0.257 | 5.59E-14        | -0.037 | 0.4772502517    |
| SE | EBPL       | - | chr13:49669776-49669846   | NA | -0.257 | 0.0002342420853 | -0.023 | 0.2089693241    |
| SE | ZEB1       | + | chr10:31387123-31387266   | NA | -0.257 | 6.18E-05        | -0.129 | 0               |
| SE | LRP8       | - | chr1:53272603-53272642    | NA | -0.257 | 0.01439386568   | -0.127 | 1               |
| SE | KIF23      | + | chr15:69440767-69441079   | NA | -0.258 | 3.51E-05        | 0.129  | 4.24E-05        |
| SE | ZDHHC24    | - | chr11:66526935-66527006   | NA | -0.258 | 0.02660810651   | -0.088 | 1               |
| SE | HEATR6     | - | chr17:60073745-60074159   | NA | -0.259 | 1.02E-05        | 0.028  | 1               |
| SE | HACE1      | - | chr6:104824813-104824907  | NA | -0.259 | 0.00276043376   | -0.096 | 1               |
| SE | MEIS3      | - | chr19:47415050-47415101   | NA | -0.259 | 0.02092964191   | -0.011 | 1               |
| SE | CCNYL1     | + | chr2:207740654-207740706  | NA | -0.26  | 2.18E-06        | -0.029 | 1               |
| SE | AC138969.4 | + | chr16:16335860-16336137   | NA | -0.26  | 0.007599994575  | -0.037 | 1               |
| SE | CHFR       | - | chr12:132869618-132869834 | NA | -0.261 | 0.0001382408096 | -0.017 | 1               |
| SE | ALG13      | + | chrX:111689086-111689197  | NA | -0.261 | 4.16E-06        | -0.091 | 1               |
| SE | RAC1       | + | chr7:6398661-6398718      | NA | -0.261 | 4.82E-06        | -0.004 | 0.5875483802    |
| SE | RP11-849H4 | - | chr11:71925932-71926104   | NA | -0.261 | 0.01221869075   | -0.062 | 1               |
| SE | MAZ        | + | chr16:29809539-29809764   | NA | -0.262 | 1.98E-06        | -0.01  | 1               |
| SE | NOD1       | - | chr7:30437572-30437656    | NA | -0.262 | 2.01E-05        | 0.051  | 0.8351505569    |
| SE | RAD1       | - | chr5:34913469-34913578    | NA | -0.262 | 0.0008025627237 | -0.024 | 1               |
| SE | RPTOR      | + | chr17:80925369-80925480   | NA | -0.262 | 0.04458274527   | 0.001  | 1               |
| SE | DNAJC19    | - | chr3:180986942-180987022  | NA | -0.262 | 1.04E-06        | 0.001  | 1               |
| SE | BRPF3      | + | chr6:36225270-36225364    | NA | -0.263 | 0.00709572117   | -0.049 | 5.10E-12        |
| SE | PREPL      | - | chr2:44359496-44360038    | NA | -0.263 | 0.000403764681  | 0.03   | 1               |
| SE | C2orf76    | - | chr2:119340158-119340361  | NA | -0.263 | 0.04431440655   | -0.078 | 0.7458835289    |
| SE | MAP4       | - | chr3:47869213-47869327    | NA | -0.264 | 0               | -0.152 | 0               |
| SE | WASF1      | - | chr6:110178597-110178742  | NA | -0.264 | 1.70E-05        | -0.071 | 0.04264150054   |
| SE | CLHC1      | - | chr2:55181569-55181744    | NA | -0.264 | 0.0002588502674 | 0.022  | 1               |
| SE | LCAT       | - | chr16:67940736-67940831   | NA | -0.264 | 0.03618639737   | 0.011  | 1               |
| SE | ZC3H14     | + | chr14:88602827-88603045   | NA | -0.265 | 0.000317236808  | -0.038 | 1               |
| SE | IFI27L1    | + | chr14:94097494-94097678   | NA | -0.265 | 0.006289332786  | 0.023  | 7.85E-06        |
| SE | CCDC57     | - | chr17:82179026-82179189   | NA | -0.265 | 0.04941263439   | -0.099 | 0.0544597215    |
| SE | IMMP1L     | - | chr11:31463171-31463305   | NA | -0.266 | 5.79E-06        | -0.025 | 0.01631422618   |
| SE | RP4-769N11 | + | chrX:102601879-102601977  | NA | -0.266 | 1.98E-07        | 0.035  | 1               |
| SE | ITGB1BP1   | - | chr2:9419989-9420100      | NA | -0.267 | 0.001505065008  | 0.025  | 1               |
| SE | PIGP       | - | chr21:37072144-37072310   | NA | -0.267 | 6.49E-09        | -0.007 | 1               |
| SE | C8orf44    | + | chr8:66676744-66676902    | NA | -0.267 | 0.02133016112   | 0.031  | 1               |
| SE | LINC00963  | + | chr9:129502396-129503139  | NA | -0.268 | 0.03797039936   | 0.041  | 0.001474455026  |
| SE | RP11-762I7 | - | chr12:55815886-55815939   | NA | -0.268 | 0.02987985873   | -0.001 | 1               |
| SE | EZH2       | - | chr7:148836821-148837000  | NA | -0.269 | 0.000373023368  | -0.15  | 1               |
| SE | KIF21A     | - | chr12:39318072-39318201   | NA | -0.269 | 2.19E-06        | -0.08  | 1               |
| SE | ARHGEF10I  | + | chr1:17634547-17634562    | NA | -0.27  | 0.02106431358   | -0.03  | 1.35E-10        |
| SE | KLHL42     | + | chr12:27797246-27797349   | NA | -0.27  | 2.88E-07        | 0.05   | 0.2378188244    |
| SE | PXN        | - | chr12:120226838-120227117 | NA | -0.27  | 0.04038676185   | 0.004  | 1               |
| SE | REPS1      | - | chr6:138926400-138926481  | NA | -0.27  | 0.01380120963   | 0.093  | 0.0005225978947 |
| SE | TMBIM6     | + | chr12:49749617-49749856   | NA | -0.271 | 0.001910715501  | 0.018  | 1               |

|    |            |   |                           |    |        |                 |        |                 |
|----|------------|---|---------------------------|----|--------|-----------------|--------|-----------------|
| SE | PLSCR1     | - | chr3:146528613-146528831  | NA | -0.271 | 0.0004347064404 | -0.054 | 0.0210189815    |
| SE | ZC3H11A    | + | chr1:203796292-203796601  | NA | -0.272 | 1.68E-09        | -0.025 | 1               |
| SE | NUMB       | - | chr14:73279280-73279424   | NA | -0.272 | 0               | 0.002  | 1               |
| SE | TTC8       | + | chr14:88841424-88841514   | NA | -0.273 | 0.03451558164   | -0.022 | 1               |
| SE | TCTN2      | + | chr12:123694841-123694976 | NA | -0.273 | 5.84E-06        | -0.008 | 1               |
| SE | SLCO4A1-A  | - | chr20:62664923-62665497   | NA | -0.273 | 2.23E-06        | -0.144 | 0.1614596839    |
| SE | BDNF-AS    | + | chr11:27658240-27658462   | NA | -0.274 | 1.00E-06        | -0.036 | 1               |
| SE | SEPT6      | - | chrX:119625334-119625379  | NA | -0.275 | 8.27E-11        | -0.023 | 1               |
| SE | INTS3      | + | chr1:153761019-153761109  | NA | -0.275 | 0               | -0.009 | 1               |
| SE | CEP78      | + | chr9:78265858-78265906    | NA | -0.275 | 3.30E-08        | 0.046  | 0.6253280454    |
| SE | EME1       | + | chr17:50378599-50378681   | NA | -0.275 | 5.50E-09        | 0.013  | 1               |
| SE | SUCO       | + | chr1:172577538-172577559  | NA | -0.276 | 0.0005405865695 | 0.127  | 7.27E-05        |
| SE | ZBED3-AS1  | + | chr5:77100235-77100391    | NA | -0.276 | 0.009747054499  | 0.082  | 1               |
| SE | MIS12      | + | chr17:5488195-5488589     | NA | -0.277 | 3.75E-10        | -0.001 | 1               |
| SE | RPE        | + | chr2:210009638-210009736  | NA | -0.277 | 0.001384659396  | -0.076 | 9.71E-11        |
| SE | BIRC5      | + | chr17:78222827-78222992   | NA | -0.278 | 2.86E-05        | 0.005  | 1               |
| SE | HDAC9      | + | chr7:18629349-18629481    | NA | -0.279 | 0.0001629656818 | 0.037  | 1               |
| SE | ZSCAN32    | - | chr16:3390009-3390133     | NA | -0.279 | 0.01658132986   | -0.054 | 1               |
| SE | NFIC       | + | chr19:3453762-3453916     | NA | -0.281 | 0.0002392046182 | -0.027 | 1               |
| SE | PDE9A      | + | chr21:42731769-42731949   | NA | -0.281 | 0.006781962229  | -0.06  | 0.1118308266    |
| SE | WDFY3      | - | chr4:84808333-84808417    | NA | -0.281 | 6.05E-07        | -0.025 | 1               |
| SE | TAF2       | - | chr8:119744880-119745036  | NA | -0.283 | 1.62E-08        | 0.009  | 1               |
| SE | TCTN1      | + | chr12:110644966-110645143 | NA | -0.283 | 0.002401590692  | -0.063 | 0.003957862823  |
| SE | AKAP11     | + | chr13:42285985-42286035   | NA | -0.284 | 0.0005294509158 | 0.011  | 1               |
| SE | SCRN3      | + | chr2:174397335-174397404  | NA | -0.284 | 0.03300582981   | 0.057  | 1               |
| SE | PHF8       | - | chrX:53993600-53993903    | NA | -0.284 | 8.23E-06        | -0.055 | 0.3846135774    |
| SE | AP1S2      | - | chrX:15833443-15833524    | NA | -0.284 | 0.03860979484   | 0.046  | 1               |
| SE | RP11-10K1c | - | chr4:173166644-173166790  | NA | -0.284 | 0.000342014704  | -0.091 | 0.02088168224   |
| SE | DCUN1D4    | + | chr4:51887122-51887244    | NA | -0.285 | 0               | 0.023  | 0.2942302704    |
| SE | ITGB1BP1   | - | chr2:9419989-9420100      | NA | -0.285 | 0.008497664699  | -0.095 | 0.2003718815    |
| SE | LINC00630  | + | chrX:102839800-102839863  | NA | -0.285 | 0.04393571592   | -0.011 | 1               |
| SE | PBRM1      | - | chr3:52554723-52554879    | NA | -0.286 | 0.008665320904  | -0.132 | 0.001071403471  |
| SE | SPTAN1     | + | chr9:128592982-128593042  | NA | -0.286 | 2.07E-07        | -0.039 | 1               |
| SE | TRIQQ      | - | chr8:92921502-92921660    | NA | -0.286 | 0.000185566505  | -0.016 | 0.4813644051    |
| SE | UBL7-AS1   | + | chr15:74466035-74466130   | NA | -0.286 | 0.00472504306   | 0.007  | 1               |
| SE | PLEKHM1    | - | chr17:45468208-45468593   | NA | -0.287 | 2.06E-05        | -0.016 | 1               |
| SE | CTD-2651B  | - | chr15:45264626-45264809   | NA | -0.287 | 0.01243842924   | 0.093  | 1               |
| SE | NR2F1-AS1  | - | chr5:93438702-93438741    | NA | -0.288 | 0.004687272022  | 0.006  | 1               |
| SE | SNX14      | - | chr6:85567533-85567577    | NA | -0.289 | 0.01711655461   | 0.08   | 0.7878538332    |
| SE | DTNB       | - | chr2:25455404-25455494    | NA | -0.289 | 0.001751966261  | -0.199 | 0               |
| SE | STK19      | + | chr6:31972620-31972919    | NA | -0.289 | 0.00395611319   | -0.022 | 1               |
| SE | PSMA3-AS1  | - | chr14:58285590-58285756   | NA | -0.289 | 0.0005255286629 | 0.03   | 1               |
| SE | COA1       | - | chr7:43665657-43665722    | NA | -0.29  | 1.78E-05        | 0.025  | 0.932701491     |
| SE | SLC35F5    | - | chr2:113717752-113717848  | NA | -0.29  | 6.95E-06        | 0.011  | 1               |
| SE | ZNF283     | + | chr19:43827775-43827940   | NA | -0.29  | 2.15E-05        | 0.048  | 1               |
| SE | ETV1       | - | chr7:13989267-13989464    | NA | -0.291 | 9.08E-05        | -0.092 | 1               |
| SE | DUS4L      | + | chr7:107573703-107573883  | NA | -0.291 | 6.90E-05        | 0.034  | 1               |
| SE | PCBP1-AS1  | - | chr2:70085815-70085903    | NA | -0.291 | 0.0008998411314 | 0.018  | 1               |
| SE | TBXAS1     | + | chr7:139782487-139782564  | NA | -0.293 | 0.04145970596   | -0.032 | 1               |
| SE | CCNYL1     | + | chr2:207733946-207734047  | NA | -0.293 | 0.0004783507939 | -0.063 | 0.2653902291    |
| SE | CCBL1      | - | chr9:128847432-128847643  | NA | -0.293 | 1.47E-07        | -0.059 | 1               |
| SE | ZNF678     | + | chr1:227646543-227646670  | NA | -0.293 | 0.01382788928   | -0.031 | 1               |
| SE | FAM189B    | - | chr1:155251094-155251164  | NA | -0.295 | 0.005179405283  | 0.056  | 1               |
| SE | EPB41L2    | - | chr6:130876673-130876775  | NA | -0.296 | 5.60E-05        | -0.17  | 1               |
| SE | TRDMT1     | - | chr10:17168840-17168917   | NA | -0.296 | 0.007123014945  | -0.048 | 1               |
| SE | SLC50A1    | + | chr1:155136827-155136951  | NA | -0.296 | 0.0001103751914 | -0.039 | 0.5783982015    |
| SE | LRRCC1     | + | chr8:85109594-85109800    | NA | -0.297 | 0.01949475042   | -0.132 | 1               |
| SE | CHRM3      | + | chr1:239826852-239827081  | NA | -0.298 | 0.04103024877   | 0.157  | 1               |
| SE | REPS1      | - | chr6:138926400-138926478  | NA | -0.299 | 0.01444851823   | 0.092  | 0.0001449755893 |
| SE | IMMP1L     | - | chr11:31460625-31460714   | NA | -0.299 | 0.01505945115   | -0.13  | 0.005720682925  |
| SE | CLASP1     | - | chr2:121445448-121445496  | NA | -0.3   | 4.70E-05        | -0.236 | 1               |
| SE | SLCO4A1    | + | chr20:62668011-62668184   | NA | -0.3   | 0               | -0.118 | 1.48E-06        |
| SE | ZBTB21     | - | chr21:42002349-42002503   | NA | -0.3   | 0.03885696071   | 0.002  | 1               |

|    |           |   |                           |    |        |                 |        |                |
|----|-----------|---|---------------------------|----|--------|-----------------|--------|----------------|
| SE | TMEM161B- | + | chr5:88283009-88283086    | NA | -0.3   | 0.01655644229   | 0.004  | 1              |
| SE | NBPF11    | - | chr1:148124898-148125001  | NA | -0.3   | 0.03825624706   | -0.001 | 1              |
| SE | PRKRIP1   | + | chr7:102395976-102396537  | NA | -0.301 | 0.000271826994  | 0.007  | 1              |
| SE | EP400NL   | + | chr12:132109767-132109832 | NA | -0.301 | 0.0007481903903 | 0.059  | 1              |
| SE | ZSCAN23   | - | chr6:28435459-28435607    | NA | -0.301 | 0.0009603740643 | -0.011 | 1              |
| SE | SREBF1    | - | chr17:17823517-17823607   | NA | -0.302 | 0.008461191506  | 0      | 1              |
| SE | CLHC1     | - | chr2:55181569-55181744    | NA | -0.302 | 5.10E-06        | -0.03  | 0.1269639185   |
| SE | PHYKPL    | - | chr5:178224615-178224729  | NA | -0.302 | 0.04422443977   | -0.023 | 1              |
| SE | CRBN      | - | chr3:3175162-3175266      | NA | -0.303 | 2.89E-14        | -0.052 | 0.1757137416   |
| SE | ODF2L     | - | chr1:86356443-86356602    | NA | -0.303 | 0.0004028475812 | 0.046  | 1              |
| SE | VAPB      | + | chr20:58434601-58434705   | NA | -0.303 | 0.004308658414  | -0.063 | 0.08639686555  |
| SE | MUTYH     | - | chr1:45332917-45332959    | NA | -0.303 | 0.01134847022   | -0.078 | 0              |
| SE | KIF21A    | - | chr12:39318072-39318201   | NA | -0.303 | 2.13E-08        | 0.012  | 1              |
| SE | EPB41     | + | chr1:29060421-29060484    | NA | -0.303 | 0.01397229194   | 0.095  | 0.1710696772   |
| SE | GDAP2     | - | chr1:117877775-117877841  | NA | -0.303 | 5.13E-05        | -0.015 | 0.775169044    |
| SE | FAM45A    | + | chr10:119105310-119105495 | NA | -0.304 | 0.0001800778006 | -0.01  | 1              |
| SE | PLA2G12A  | - | chr4:109718682-109718759  | NA | -0.304 | 1.31E-08        | -0.025 | 0.03889098255  |
| SE | PPP4R1    | - | chr18:9562921-9563046     | NA | -0.304 | 0.0007881069043 | 0.011  | 1              |
| SE | DLGAP1-AS | + | chr18:3596578-3596675     | NA | -0.304 | 4.07E-06        | 0.028  | 1              |
| SE | CAPRN2    | - | chr12:30719078-30720915   | NA | -0.305 | 0.0002400924652 | -0.047 | 1              |
| SE | CLHC1     | - | chr2:55228031-55228204    | NA | -0.305 | 0.02539319847   | 0.074  | 1              |
| SE | FAHD2A    | + | chr2:95410526-95410586    | NA | -0.306 | 0.0211341988    | -0.027 | 0.000765265166 |
| SE | MCAT      | - | chr22:43137080-43137298   | NA | -0.307 | 0.0003041334185 | -0.02  | 1              |
| SE | STAG2     | + | chrX:124021366-124021431  | NA | -0.307 | 0.0001010478751 | -0.159 | 1              |
| SE | MIATNB    | + | chr22:26718139-26718231   | NA | -0.307 | 0.01784243899   | -0.016 | 1              |
| SE | MDM1      | - | chr12:68325440-68325575   | NA | -0.31  | 0.01658132986   | -0.016 | 1              |
| SE | IKZF4     | + | chr12:56023670-56023764   | NA | -0.31  | 0.02968938387   | 0.117  | 1              |
| SE | ZBTB1     | + | chr14:64516599-64516751   | NA | -0.31  | 6.58E-06        | 0.022  | 1              |
| SE | MATR3     | + | chr5:139293452-139293575  | NA | -0.31  | 0.004029235655  | 0.046  | 1              |
| SE | LRP2BP    | - | chr4:185378080-185378207  | NA | -0.311 | 0.01178140079   | -0.037 | 1              |
| SE | PARPBP    | + | chr12:102182548-102182627 | NA | -0.311 | 0.0002851607735 | -0.071 | 1              |
| SE | AK2       | - | chr1:33011447-33011710    | NA | -0.312 | 9.96E-06        | -0.002 | 1              |
| SE | CDC25C    | - | chr5:138325814-138325904  | NA | -0.312 | 1.94E-06        | -0.06  | 1              |
| SE | MAN2B2    | + | chr4:6609396-6609574      | NA | -0.313 | 0.0001010478751 | 0.001  | 1              |
| SE | CHEK1     | + | chr11:125656205-125656335 | NA | -0.313 | 0.0002812419842 | 0.064  | 1              |
| SE | LINC00174 | - | chr7:66400321-66400437    | NA | -0.314 | 0.0008590836179 | 0.068  | 1              |
| SE | ELMOD3    | + | chr2:85355554-85355784    | NA | -0.315 | 0.04376813577   | 0.012  | 1              |
| SE | PCNX      | + | chr14:70988566-70988699   | NA | -0.316 | 0.006891588316  | -0.042 | 1              |
| SE | TMEM161B- | + | chr5:88285740-88285851    | NA | -0.317 | 2.86E-06        | 0.002  | 1              |
| SE | NEDD4     | - | chr15:55991925-55992005   | NA | -0.318 | 0.01072761332   | -0.05  | 1              |
| SE | FAM208B   | + | chr10:5709529-5709663     | NA | -0.318 | 0.0313341614    | -0.105 | 1              |
| SE | ZCWPW2    | + | chr3:28478813-28478931    | NA | -0.318 | 0.04732471362   | 0.017  | 1              |
| SE | NEK6      | + | chr9:124292848-124293013  | NA | -0.319 | 0.004357067677  | -0.028 | 0.01472867009  |
| SE | FAM193B   | - | chr5:177531281-177531521  | NA | -0.319 | 2.98E-05        | -0.011 | 1              |
| SE | CDKL3     | - | chr5:134350248-134350427  | NA | -0.32  | 0.02984907237   | -0.062 | 1              |
| SE | LINC00969 | + | chr3:195663623-195663832  | NA | -0.32  | 2.17E-06        | 0.06   | 1              |
| SE | WIPF1     | - | chr2:174677044-174677124  | NA | -0.321 | 0.004005348732  | -0.027 | 1              |
| SE | ISCU      | + | chr12:108564059-108564155 | NA | -0.321 | 0.0001418305399 | -0.007 | 0.5714972179   |
| SE | C8orf44   | + | chr8:66677641-66677954    | NA | -0.321 | 0.01632161566   | 0.026  | 1              |
| SE | ZNF761    | + | chr19:53445000-53445123   | NA | -0.322 | 1.76E-05        | 0.021  | 1              |
| SE | OSBPL6    | + | chr2:178324176-178324269  | NA | -0.323 | 1.60E-09        | -0.043 | 1              |
| SE | KCTD9     | - | chr8:25446079-25446250    | NA | -0.323 | 0.01287710281   | 0.039  | 1              |
| SE | MRPS31P4  | + | chr13:52629218-52629359   | NA | -0.323 | 0.0001872472194 | -0.164 | 0.002335329708 |
| SE | ZC3H14    | + | chr14:88601923-88602083   | NA | -0.325 | 0.0001541382425 | -0.024 | 1              |
| SE | ST5       | - | chr11:8729949-8731209     | NA | -0.325 | 0.0007143248076 | -0.038 | 0.9077938238   |
| SE | TMTC4     | - | chr13:100670282-100670569 | NA | -0.327 | 1.64E-06        | 0.015  | 1              |
| SE | POLR2J4   | - | chr7:43986600-43986677    | NA | -0.327 | 0.001407114613  | -0.09  | 0.02530429799  |
| SE | ATXN3     | - | chr14:92047895-92048089   | NA | -0.328 | 0.01781677028   | 0.025  | 1              |
| SE | KANK2     | - | chr19:11196049-11196227   | NA | -0.329 | 0.00167889463   | 0.12   | 1              |
| SE | ANKDD1A   | + | chr15:64944651-64944747   | NA | -0.33  | 5.01E-05        | -0.048 | 0.2380220377   |
| SE | STAG3L4   | + | chr7:67308576-67308652    | NA | -0.331 | 0.0009659206584 | -0.21  | 1              |
| SE | SLC50A1   | + | chr1:155136827-155136951  | NA | -0.332 | 1.70E-06        | -0.02  | 1              |
| SE | HHLA3     | + | chr1:70366145-70366328    | NA | -0.332 | 0.03495076767   | 0.033  | 1.29E-05       |

|    |             |   |                           |    |        |                 |        |                 |
|----|-------------|---|---------------------------|----|--------|-----------------|--------|-----------------|
| SE | ADAMTS13    | + | chr9:133438245-133438366  | NA | -0.333 | 9.27E-05        | 0.03   | 1               |
| SE | AC004381.6  | + | chr16:20813189-20813302   | NA | -0.334 | 0.0241083796    | 0.041  | 1               |
| SE | CARD8       | - | chr19:48242539-48242644   | NA | -0.334 | 6.60E-07        | 0.002  | 1               |
| SE | KLHL7       | + | chr7:23117833-23117964    | NA | -0.334 | 0.002563569625  | -0.174 | 1.47E-05        |
| SE | KCTD9       | - | chr8:25446128-25446250    | NA | -0.335 | 0.007073635801  | 0.035  | 1               |
| SE | MCM3        | - | chr6:52265234-52265385    | NA | -0.335 | 0               | 0.004  | 0.3051416962    |
| SE | MARK2       | + | chr11:63903985-63904147   | NA | -0.336 | 0.04088100642   | 0.111  | 1.17E-06        |
| SE | PGAP2       | + | chr11:3823616-3823740     | NA | -0.337 | 0.04930931816   | 0.079  | 1               |
| SE | SLMAP       | + | chr3:57907883-57908006    | NA | -0.337 | 0               | -0.046 | 1               |
| SE | IQCB1       | - | chr3:121797117-121797227  | NA | -0.338 | 0.003619441762  | -0.041 | 1               |
| SE | BAG6        | - | chr6:31639499-31639646    | NA | -0.338 | 1.58E-13        | 0      | 1               |
| SE | NADK        | - | chr1:1756778-1756882      | NA | -0.34  | 2.89E-14        | 0.002  | 1               |
| SE | CDKL1       | - | chr14:50332261-50332432   | NA | -0.34  | 2.97E-05        | 0.083  | 0.6450388627    |
| SE | PPA2        | - | chr4:105456695-105456745  | NA | -0.34  | 1.28E-09        | -0.065 | 0.08720728937   |
| SE | POLL        | - | chr10:101584877-101584919 | NA | -0.34  | 0.01394848916   | -0.09  | 1               |
| SE | LIPT1       | + | chr2:99156300-99156426    | NA | -0.342 | 0.01909479024   | -0.012 | 1               |
| SE | FBXL2       | + | chr3:33297868-33297962    | NA | -0.342 | 0.002142500663  | -0.024 | 1               |
| SE | RP11-42110. | + | chr16:48671860-48672033   | NA | -0.342 | 6.74E-05        | 0.011  | 1               |
| SE | CDC25C      | - | chr5:138326020-138326054  | NA | -0.343 | 8.74E-06        | -0.101 | 1               |
| SE | ADARB1      | + | chr21:45184473-45184593   | NA | -0.343 | 2.24E-05        | 0.039  | 1               |
| SE | BDNF-AS     | + | chr11:27675576-27676140   | NA | -0.343 | 0.001406429329  | 0.001  | 1               |
| SE | BCAT2       | - | chr19:48807755-48808236   | NA | -0.345 | 0.01860693698   | -0.136 | 0.008072673115  |
| SE | ZGRF1       | - | chr4:112548252-112548380  | NA | -0.346 | 2.11E-06        | -0.122 | 0.005489998185  |
| SE | FAM76B      | - | chr11:95779077-95779135   | NA | -0.347 | 2.25E-07        | -0.064 | 0.1550974639    |
| SE | PPRC1       | + | chr10:102146671-102147392 | NA | -0.347 | 2.35E-13        | 0.031  | 1               |
| SE | PICALM      | - | chr11:85990249-85990399   | NA | -0.349 | 0.0001596972278 | 0.009  | 1               |
| SE | MAP4K4      | + | chr2:101860824-101860986  | NA | -0.35  | 1.98E-11        | 0.024  | 0.6076199675    |
| SE | DENND4A     | - | chr15:65700543-65700672   | NA | -0.35  | 1.22E-07        | 0.079  | 1               |
| SE | GIGYF2      | + | chr2:232722553-232722658  | NA | -0.35  | 0.03294531518   | 0.048  | 1               |
| SE | DRAM2       | - | chr1:111139587-111139711  | NA | -0.351 | 8.31E-06        | -0.108 | 0.007389615969  |
| SE | AP3S2       | - | chr15:89877305-89877424   | NA | -0.351 | 0.01954407125   | -0.166 | 0.002541734369  |
| SE | TOPORS-AS   | + | chr9:32565396-32565628    | NA | -0.351 | 0.001855130247  | -0.099 | 1               |
| SE | NADK        | - | chr1:1756738-1756882      | NA | -0.352 | 5.59E-14        | 0.005  | 0.6692838042    |
| SE | RALY        | + | chr20:34065043-34065160   | NA | -0.352 | 0.0005418065682 | -0.04  | 0.4734481098    |
| SE | TCTN1       | + | chr12:110634395-110634463 | NA | -0.353 | 0.005171587045  | -0.107 | 0.006492979708  |
| SE | UBE2Q2P2    | + | chr15:82408287-82408367   | NA | -0.354 | 6.56E-05        | 0.022  | 1               |
| SE | GSAP        | - | chr7:77328605-77328637    | NA | -0.358 | 1.17E-05        | -0.107 | 1               |
| SE | RPS3A       | + | chr4:151100484-151100588  | NA | -0.359 | 3.45E-09        | -0.003 | 1               |
| SE | KIAA0586    | + | chr14:58543882-58543967   | NA | -0.36  | 4.82E-05        | -0.031 | 0.05872442611   |
| SE | TWF1        | - | chr12:43805830-43806002   | NA | -0.36  | 0.0001485744595 | 0.008  | 0.009466461147  |
| SE | C5orf45     | - | chr5:179853196-179853276  | NA | -0.36  | 0.01335046322   | -0.098 | 1               |
| SE | PRKRIP1     | + | chr7:102395976-102396537  | NA | -0.361 | 2.37E-05        | -0.032 | 1               |
| SE | MRPL52      | + | chr14:22830963-22831037   | NA | -0.361 | 0.004738364736  | 0.041  | 0.005021442539  |
| SE | PCNX        | + | chr14:70995740-70995925   | NA | -0.362 | 6.66E-05        | 0.016  | 1               |
| SE | ANXA2       | - | chr15:60396150-60396427   | NA | -0.362 | 0.006386827087  | 0.079  | 1               |
| SE | RP11-421L2  | + | chr1:101075394-101075716  | NA | -0.362 | 1.04E-06        | -0.113 | 0.0005273259685 |
| SE | KB-1572G7.  | - | chr22:23686830-23686995   | NA | -0.362 | 0.008304198588  | -0.082 | 1               |
| SE | SLC25A26    | + | chr3:66236543-66236700    | NA | -0.363 | 0.00798304603   | -0.013 | 1               |
| SE | POGLUT1     | + | chr3:119478333-119478474  | NA | -0.363 | 0.01651821476   | -0.045 | 1               |
| SE | RP11-849H4  | - | chr11:71925932-71926104   | NA | -0.363 | 0.01809089575   | 0.07   | 1               |
| SE | RAD51D      | - | chr17:35116858-35117037   | NA | -0.364 | 0.04505876384   | 0.023  | 1               |
| SE | SGSM2       | + | chr17:2367270-2367405     | NA | -0.365 | 1.48E-06        | -0.048 | 0.0007408437771 |
| SE | ZC3H18      | + | chr16:88611267-88611536   | NA | -0.365 | 0.001733304234  | -0.015 | 1               |
| SE | GK          | + | chrX:30668011-30668118    | NA | -0.365 | 0.002839945502  | -0.015 | 1               |
| SE | CC2D2A      | + | chr4:15479222-15479328    | NA | -0.366 | 0.01617330057   | 0.108  | 3.17E-10        |
| SE | RTN2        | - | chr19:45493159-45493378   | NA | -0.366 | 0.00365172218   | -0.11  | 0.0003053249332 |
| SE | PGAP2       | + | chr11:3823612-3823740     | NA | -0.366 | 0.001732186964  | 0.039  | 0.001668824333  |
| SE | ZSCAN31     | - | chr6:28329302-28329778    | NA | -0.367 | 0.0001149006239 | 0.043  | 1               |
| SE | LPHN2       | + | chr1:81952986-81953025    | NA | -0.368 | 0.004113255113  | 0.037  | 1               |
| SE | BDNF-AS     | + | chr11:27675296-27676140   | NA | -0.368 | 0.00177508727   | 0      | 1               |
| SE | RPS3A       | + | chr4:151100974-151101085  | NA | -0.371 | 1.58E-06        | -0.005 | 1               |
| SE | C3orf18     | - | chr3:50565525-50565700    | NA | -0.372 | 0.01820919836   | 0.038  | 0.8353793742    |
| SE | MGAT5       | + | chr2:134253094-134253218  | NA | -0.373 | 0.01190796755   | -0.015 | 1               |

|    |           |   |                           |    |        |                 |        |                |
|----|-----------|---|---------------------------|----|--------|-----------------|--------|----------------|
| SE | ANAPC16   | + | chr10:72220053-72220379   | NA | -0.373 | 2.52E-07        | -0.011 | 1              |
| SE | CCNI      | - | chr4:77056248-77056323    | NA | -0.374 | 0.0007768817232 | 0.057  | 1              |
| SE | NFIB      | - | chr9:14116180-14116346    | NA | -0.374 | 0.002058724474  | -0.036 | 2.82E-05       |
| SE | SREBF1    | - | chr17:17817547-17817591   | NA | -0.375 | 0.0013265261    | -0.002 | 1              |
| SE | ELMOD3    | + | chr2:85387097-85387225    | NA | -0.375 | 0.0001184888955 | 0.004  | 1              |
| SE | NME6      | - | chr3:48296118-48296158    | NA | -0.375 | 7.94E-06        | 0.038  | 1              |
| SE | ZNF680    | - | chr7:64543706-64543802    | NA | -0.377 | 4.99E-05        | -0.043 | 1              |
| SE | ATP5C1    | + | chr10:7806973-7807010     | NA | -0.379 | 0.0004310721539 | 0.019  | 1              |
| SE | SGCE      | - | chr7:94639340-94639448    | NA | -0.38  | 0.003512996048  | 0.006  | 1              |
| SE | ANKAR     | + | chr2:189705022-189705224  | NA | -0.38  | 6.03E-05        | -0.008 | 1              |
| SE | ZSCAN31   | - | chr6:28329302-28329714    | NA | -0.38  | 8.71E-05        | 0.043  | 1              |
| SE | CREB1     | + | chr2:207577109-207577224  | NA | -0.381 | 0.001185968339  | -0.111 | 1              |
| SE | TMEM260   | + | chr14:56621530-56621702   | NA | -0.384 | 4.25E-06        | -0.055 | 0.02941186272  |
| SE | MAP4K4    | + | chr2:101860824-101860986  | NA | -0.384 | 6.13E-05        | -0.195 | 1.41E-10       |
| SE | RWDD3     | + | chr1:95237347-95237460    | NA | -0.386 | 0.0002933051974 | -0.004 | 1              |
| SE | PICALM    | - | chr11:85990249-85990378   | NA | -0.387 | 0               | 0.015  | 4.24E-05       |
| SE | MRPS28    | - | chr8:80028694-80028796    | NA | -0.387 | 0.01459665929   | -0.1   | 0.002399977568 |
| SE | KIF21B    | - | chr1:200983055-200983094  | NA | -0.388 | 0.005890845208  | 0.08   | 1              |
| SE | NME6      | - | chr3:48296118-48296236    | NA | -0.388 | 0.001460213182  | 0.087  | 0.364791001    |
| SE | ABCA11P   | - | chr4:437445-437511        | NA | -0.39  | 0.0008550215213 | -0.059 | 1              |
| SE | FAM76B    | - | chr11:95779077-95779135   | NA | -0.393 | 0.0002600015158 | -0.104 | 1              |
| SE | TPM1      | + | chr15:63064063-63064190   | NA | -0.394 | 0.0003706949144 | 0.005  | 1              |
| SE | NAP1L4    | - | chr11:2989128-2989271     | NA | -0.394 | 6.18E-07        | -0.023 | 1              |
| SE | NISCH     | + | chr3:52480878-52481109    | NA | -0.395 | 0.001052296447  | -0.052 | 1              |
| SE | CLEC2D    | + | chr12:9693033-9693115     | NA | -0.395 | 0.02024804826   | -0.036 | 1              |
| SE | ACYP2     | + | chr2:54050957-54051050    | NA | -0.395 | 0.0004126182547 | 0.003  | 1              |
| SE | TRAPPC13  | + | chr5:65655635-65655653    | NA | -0.396 | 1.37E-05        | -0.068 | 0.1112287712   |
| SE | OPA1      | + | chr3:193617783-193617837  | NA | -0.396 | 0.002268274405  | -0.047 | 1              |
| SE | FAM66C    | + | chr12:8195276-8195412     | NA | -0.396 | 0.02043424899   | -0.009 | 1              |
| SE | RASSF8-AS | - | chr12:25947518-25947622   | NA | -0.397 | 0.0415224856    | -0.036 | 1              |
| SE | SNAPC5    | - | chr15:66494902-66495419   | NA | -0.399 | 0.001312004339  | -0.029 | 1              |
| SE | FOXMI     | - | chr12:2865354-2865399     | NA | -0.4   | 0               | -0.291 | 0              |
| SE | STX16     | + | chr20:58669301-58669453   | NA | -0.4   | 4.53E-08        | -0.033 | 1              |
| SE | DOCK7     | - | chr1:62544946-62545039    | NA | -0.402 | 7.63E-12        | 0.028  | 0.02735058732  |
| SE | ZNF211    | + | chr19:57633785-57633905   | NA | -0.403 | 0.002075918316  | 0.058  | 1              |
| SE | ULK4      | - | chr3:41915976-41916052    | NA | -0.403 | 0.01803272989   | 0.028  | 1              |
| SE | TRIM16    | - | chr17:15677175-15677280   | NA | -0.403 | 0.01092216805   | -0.054 | 1              |
| SE | DLEU2     | - | chr13:50044650-50044768   | NA | -0.404 | 1.13E-06        | -0.047 | 1              |
| SE | ING4      | - | chr12:6655637-6655913     | NA | -0.405 | 0.001631986303  | -0.094 | 1              |
| SE | CPNE3     | + | chr8:86524876-86524997    | NA | -0.406 | 4.50E-07        | -0.131 | 1              |
| SE | SEMA4F    | + | chr2:74657852-74657951    | NA | -0.406 | 1.72E-06        | 0.186  | 1              |
| SE | SEPT6     | - | chrX:119625334-119625379  | NA | -0.408 | 0.001889786218  | 0.017  | 0.4065025993   |
| SE | PARBP     | + | chr12:102195311-102195447 | NA | -0.408 | 7.60E-05        | -0.044 | 1              |
| SE | PICALM    | - | chr11:85990249-85990378   | NA | -0.41  | 0.004066478452  | 0.001  | 1              |
| SE | CCDC7     | + | chr10:32471063-32471230   | NA | -0.41  | 0.03915855325   | -0.056 | 1              |
| SE | C1orf159  | - | chr1:1083914-1084011      | NA | -0.411 | 0.00746974798   | 0.037  | 0.291894514    |
| SE | ZNF789    | + | chr7:99478273-99478356    | NA | -0.412 | 0.001102013063  | -0.044 | 1              |
| SE | ENTPD1    | + | chr10:95842343-95842494   | NA | -0.413 | 0.0001503356103 | 0.002  | 1              |
| SE | ARL13B    | + | chr3:93996562-93996684    | NA | -0.413 | 0.009312346136  | 0.034  | 1              |
| SE | NUMA1     | - | chr11:72012400-72012442   | NA | -0.417 | 2.52E-09        | -0.102 | 0              |
| SE | SLC25A29  | - | chr14:100298026-100298190 | NA | -0.417 | 0.001127335634  | -0.003 | 1              |
| SE | PSMA3-AS1 | - | chr14:58293065-58293138   | NA | -0.417 | 1.58E-13        | -0.004 | 0.9650937482   |
| SE | CA5B      | + | chrX:15772495-15772614    | NA | -0.418 | 0.0001159793671 | -0.003 | 1              |
| SE | TPM1      | + | chr15:63061197-63061273   | NA | -0.419 | 8.14E-10        | -0.075 | 0.01630012279  |
| SE | FAM227B   | - | chr15:49577171-49577305   | NA | -0.42  | 0.0006714121578 | 0.051  | 1              |
| SE | IKZF4     | + | chr12:56019317-56019415   | NA | -0.422 | 0.002024138061  | 0.056  | 1              |
| SE | SEC24B    | + | chr4:109481676-109481781  | NA | -0.425 | 2.17E-11        | 0.107  | 0.005586626612 |
| SE | APEH      | + | chr3:49674488-49674621    | NA | -0.425 | 5.13E-08        | -0.067 | 2.69E-05       |
| SE | HCG18     | - | chr6:30314268-30314482    | NA | -0.426 | 0.01832264645   | -0.023 | 1              |
| SE | PARD3     | - | chr10:34336198-34336243   | NA | -0.427 | 1.53E-12        | 0.037  | 1              |
| SE | MACF1     | + | chr1:39436481-39436490    | NA | -0.428 | 5.56E-07        | -0.19  | 1.61E-07       |
| SE | MRPS6     | + | chr21:34103496-34103519   | NA | -0.428 | 0.001796423469  | 0.047  | 1              |
| SE | STX2      | - | chr12:130795994-130796120 | NA | -0.43  | 0               | 0.063  | 0.2859101726   |

|    |            |   |                           |    |        |                 |        |                 |   |
|----|------------|---|---------------------------|----|--------|-----------------|--------|-----------------|---|
| SE | PGAP2      | + | chr11:3823612-3823740     | NA | -0.434 | 0.01725172355   | 0.087  |                 | 1 |
| SE | ATP11B     | + | chr3:182902480-182902566  | NA | -0.436 | 0.0001130729132 | -0.115 |                 | 1 |
| SE | TMEM161B-  | + | chr5:88287435-88287622    | NA | -0.436 | 4.27E-09        | -0.073 | 0.5167260806    |   |
| SE | WDR27      | - | chr6:169613558-169613656  | NA | -0.437 | 2.16E-05        | -0.002 |                 | 1 |
| SE | CDK4       | - | chr12:57750441-57750563   | NA | -0.44  | 0.008685505951  | -0.044 |                 | 1 |
| SE | AGPAT4     | - | chr6:161165576-161165713  | NA | -0.441 | 0.001023745599  | -0.12  |                 | 1 |
| SE | PVR        | + | chr19:44658741-44658765   | NA | -0.441 | 0.0002963289862 | 0.023  |                 | 1 |
| SE | CC2D1B     | - | chr1:52354364-52354454    | NA | -0.441 | 1.52E-05        | -0.001 |                 | 1 |
| SE | TMEM234    | - | chr1:32217436-32217577    | NA | -0.441 | 0.000117787783  | -0.024 | 0.0003342243668 |   |
| SE | DHFR       | - | chr5:80637882-80638009    | NA | -0.441 | 0.004239439132  | -0.018 |                 | 1 |
| SE | EPB41L1    | + | chr20:36173763-36173954   | NA | -0.442 | 0.0111182907    | 0.024  |                 | 1 |
| SE | GPR56      | + | chr16:57641586-57641708   | NA | -0.443 | 0.009505385205  | 0.124  | 1.73E-12        |   |
| SE | SIL1       | - | chr5:139127943-139128052  | NA | -0.447 | 4.68E-06        | 0.011  |                 | 1 |
| SE | DDR1       | + | chr6:30885624-30885680    | NA | -0.447 | 0.0001146660205 | -0.177 | 3.91E-13        |   |
| SE | HERC2P9    | + | chr15:28655494-28655691   | NA | -0.447 | 0.001439456619  | -0.001 |                 | 1 |
| SE | NUDT13     | + | chr10:73125397-73125509   | NA | -0.448 | 0.02109524081   | 0.006  |                 | 1 |
| SE | LRRC37A4F  | - | chr17:45542763-45542835   | NA | -0.448 | 0.0006039756834 | 0.013  |                 | 1 |
| SE | RP11-345J4 | - | chr16:29450111-29450276   | NA | -0.448 | 0.01900449467   | 0.091  |                 | 1 |
| SE | NBPF8P     | + | chr1:120447093-120447166  | NA | -0.448 | 4.38E-05        | 0.5    |                 | 1 |
| SE | SUOX       | + | chr12:55999332-55999590   | NA | -0.449 | 0.001493573318  | -0.019 |                 | 1 |
| SE | ITPRIPL1   | + | chr2:96325746-96325849    | NA | -0.45  | 4.21E-05        | -0.053 |                 | 1 |
| SE | MED12L     | + | chr3:151409242-151409332  | NA | -0.451 | 0.0006243958793 | 0.012  |                 | 1 |
| SE | SPIN1      | + | chr9:88416643-88416766    | NA | -0.452 | 0.003349315801  | 0.12   |                 | 1 |
| SE | CSAD       | - | chr12:53171325-53171441   | NA | -0.452 | 0.00576997794   | -0.052 |                 | 1 |
| SE | NISCH      | + | chr3:52480878-52481037    | NA | -0.453 | 0.0001737618393 | -0.049 |                 | 1 |
| SE | C14orf93   | - | chr14:22999956-23000117   | NA | -0.453 | 0.003140202336  | 0.046  |                 | 1 |
| SE | NSRP1      | + | chr17:30163066-30163162   | NA | -0.453 | 0.02613073178   | 0.058  |                 | 1 |
| SE | FAM86FP    | - | chr12:8235252-8235518     | NA | -0.454 | 0.04253479721   | 0.235  | 1.12E-06        |   |
| SE | C8orf44    | + | chr8:66676744-66676902    | NA | -0.455 | 0.0009339975889 | 0.055  |                 | 1 |
| SE | PRR34-AS1  | + | chr22:46055598-46055733   | NA | -0.455 | 7.54E-05        | 0.122  |                 | 1 |
| SE | CDKL3      | - | chr5:134312291-134312380  | NA | -0.456 | 7.45E-05        | 0.05   |                 | 1 |
| SE | PICALM     | - | chr11:85990249-85990399   | NA | -0.458 | 0               | 0.019  | 0.0002234820154 |   |
| SE | CCDC148    | - | chr2:158345214-158345318  | NA | -0.458 | 0.02324707802   | -0.162 |                 | 1 |
| SE | SPATS2L    | + | chr2:200308886-200309090  | NA | -0.459 | 0.02523595813   | -0.055 | 0.003101143011  |   |
| SE | CCDC15     | + | chr11:124991460-124991583 | NA | -0.46  | 0.0001503356103 | 0.117  |                 | 1 |
| SE | EXO1       | + | chr1:241849111-241849216  | NA | -0.46  | 1.86E-12        | -0.09  |                 | 1 |
| SE | CLEC2D     | + | chr12:9693824-9693948     | NA | -0.461 | 5.17E-05        | -0.004 |                 | 1 |
| SE | DHRS4L2    | + | chr14:24001383-24001517   | NA | -0.461 | 0.0006418050778 | 0.071  | 0.4484524402    |   |
| SE | LCA5L      | - | chr21:39427758-39427905   | NA | -0.462 | 0.001839490346  | 0.086  |                 | 1 |
| SE | BBS1       | + | chr11:66523171-66523365   | NA | -0.462 | 0.0001503356103 | 0.023  | 1.21E-09        |   |
| SE | FAM228B    | + | chr2:24137908-24138100    | NA | -0.463 | 0.0005866349904 | 0.003  |                 | 1 |
| SE | LINC00630  | + | chrX:102825992-102826169  | NA | -0.467 | 0.0002076409456 | -0.152 |                 | 1 |
| SE | RP11-9G1.3 | - | chr4:133140585-133140659  | NA | -0.468 | 2.41E-06        | 0.043  |                 | 1 |
| SE | TMEM241    | - | chr18:23370215-23370261   | NA | -0.469 | 2.54E-05        | 0.057  |                 | 1 |
| SE | VCAN       | + | chr5:83537006-83542268    | NA | -0.471 | 3.38E-05        | -0.202 |                 | 0 |
| SE | SHF        | - | chr15:45171882-45172002   | NA | -0.471 | 0.001004510926  | 0.027  |                 | 1 |
| SE | UBA2       | + | chr19:34431860-34431931   | NA | -0.474 | 0.001456868059  | 0.044  |                 | 1 |
| SE | BPHL       | + | chr6:3119284-3119512      | NA | -0.475 | 1.12E-05        | 0.035  |                 | 1 |
| SE | SLC3A2     | + | chr11:62870744-62870837   | NA | -0.475 | 0               | -0.164 | 0.0004743134009 |   |
| SE | NHSL1      | - | chr6:138441982-138442114  | NA | -0.476 | 0.007436656522  | 0.027  |                 | 1 |
| SE | PVR        | + | chr19:44658741-44658765   | NA | -0.478 | 0.0002048526225 | 0.045  |                 | 1 |
| SE | HCG18      | - | chr6:30314268-30314482    | NA | -0.478 | 1.30E-07        | 0.039  |                 | 1 |
| SE | INVS       | + | chr9:100131869-100131954  | NA | -0.479 | 0.00118875574   | -0.12  |                 | 1 |
| SE | PLCB4      | + | chr20:9373046-9373104     | NA | -0.482 | 0.0001633148417 | -0.178 |                 | 1 |
| SE | SUOX       | + | chr12:55999332-55999458   | NA | -0.483 | 0.02072133492   | -0.063 |                 | 1 |
| SE | SMARCC2    | - | chr12:56164302-56164368   | NA | -0.483 | 0.0003110222918 | -0.065 |                 | 0 |
| SE | PBRM1      | - | chr3:52554723-52554879    | NA | -0.487 | 0.002131254622  | -0.026 | 0.3753665405    |   |
| SE | DCLK2      | + | chr4:150253473-150253556  | NA | -0.488 | 7.92E-10        | -0.024 |                 | 0 |
| SE | SDHAP1     | - | chr3:195968218-195968385  | NA | -0.49  | 0               | 0.009  |                 | 1 |
| SE | DTNB       | - | chr2:25383835-25383889    | NA | -0.491 | 0.0008538554437 | -0.053 | 0.02369477492   |   |
| SE | TRIM16     | - | chr17:15677175-15677280   | NA | -0.495 | 0.002239049543  | 0.047  |                 | 1 |
| SE | MIOS       | + | chr7:7567606-7567688      | NA | -0.497 | 0.0001530389937 | 0.068  |                 | 1 |
| SE | CLHC1      | - | chr2:55208625-55208710    | NA | -0.498 | 9.57E-05        | 0.06   |                 | 1 |

|    |            |   |                           |    |        |                 |        |                |   |
|----|------------|---|---------------------------|----|--------|-----------------|--------|----------------|---|
| SE | AC004076.9 | - | chr19:57475659-57475786   | NA | -0.498 | 0.0001214203275 | -0.003 |                | 1 |
| SE | FAM86EP    | - | chr4:3948089-3948220      | NA | -0.499 | 0.001505065008  | -0.011 |                | 1 |
| SE | AREL1      | - | chr14:74701668-74701774   | NA | -0.502 | 0.001735749298  | -0.193 |                | 1 |
| SE | RWDD3      | + | chr1:95239776-95239909    | NA | -0.503 | 0.0002931707329 | -0.008 |                | 1 |
| SE | FANCI      | + | chr15:89245755-89245839   | NA | -0.504 | 3.29E-08        | -0.002 |                | 1 |
| SE | C6orf52    | - | chr6:10672546-10672636    | NA | -0.505 | 0.01885208174   | -0.064 |                | 1 |
| SE | OPA1       | + | chr3:193667370-193667455  | NA | -0.506 | 0.01205057511   | -0.239 |                | 1 |
| SE | ZNF611     | - | chr19:52707391-52707538   | NA | -0.506 | 0.00374323208   | -0.027 |                | 1 |
| SE | SHF        | - | chr15:45171882-45172078   | NA | -0.508 | 0.0007745711686 | 0.034  | 0.9718710115   |   |
| SE | SLCO4A1    | + | chr20:62668157-62668184   | NA | -0.51  | 0.006698640151  | -0.133 |                | 1 |
| SE | CSAD       | - | chr12:53171176-53171441   | NA | -0.51  | 0.0001524546588 | -0.043 |                | 1 |
| SE | LINC01128  | + | chr1:850177-850351        | NA | -0.51  | 0.02372588051   | 0.083  |                | 1 |
| SE | DYNLL1     | + | chr12:120495283-120495437 | NA | -0.512 | 0.001232062067  | 0.073  |                | 1 |
| SE | ANAPC16    | + | chr10:72220053-72220379   | NA | -0.512 | 0               | -0.043 | 0.2418983119   |   |
| SE | STX16-NPE  | + | chr20:58691404-58691562   | NA | -0.512 | 0.0002874981515 | -0.089 |                | 1 |
| SE | DIAPH2     | + | chrX:96763099-96763120    | NA | -0.514 | 0.0001769287926 | -0.011 |                | 1 |
| SE | GGT1       | + | chr22:24608989-24609231   | NA | -0.515 | 3.61E-05        | 0.016  |                | 1 |
| SE | RSRC2      | - | chr12:122526169-122526293 | NA | -0.517 | 0.0001240921588 | 0.017  |                | 1 |
| SE | NUDT13     | + | chr10:73125397-73125509   | NA | -0.517 | 0.0008479198092 | 0.034  |                | 1 |
| SE | RPL17      | - | chr18:49491735-49491833   | NA | -0.518 | 1.66E-09        | 0.066  | 0.003111975725 |   |
| SE | RPL17      | - | chr18:49491735-49491833   | NA | -0.518 | 0               | 0.024  | 5.34E-05       |   |
| SE | DENND4C    | + | chr9:19336685-19336832    | NA | -0.52  | 0               | 0.028  |                | 1 |
| SE | CSAD       | - | chr12:53171272-53171441   | NA | -0.52  | 0.0002923670232 | -0.041 |                | 1 |
| SE | ERBB2IP    | + | chr5:66075023-66075230    | NA | -0.523 | 0               | -0.006 |                | 1 |
| SE | C5orf45    | - | chr5:179853196-179853276  | NA | -0.526 | 0.0003544351238 | -0.12  |                | 1 |
| SE | PHYKPL     | - | chr5:178223319-178223451  | NA | -0.526 | 4.88E-07        | 0.015  |                | 1 |
| SE | C1orf50    | + | chr1:42767508-42767624    | NA | -0.527 | 3.15E-07        | -0.082 | 0.008228621344 |   |
| SE | CCDC150    | + | chr2:196677114-196677192  | NA | -0.528 | 0.0001382276306 | -0.06  |                | 1 |
| SE | SUOX       | + | chr12:55999332-55999458   | NA | -0.531 | 4.75E-05        | -0.019 |                | 1 |
| SE | RWDD3      | + | chr1:95239776-95239909    | NA | -0.532 | 1.07E-06        | -0.022 |                | 1 |
| SE | TMEM254    | + | chr10:80086230-80086258   | NA | -0.532 | 0.0004276980026 | -0.025 |                | 1 |
| SE | FBXL12     | - | chr19:9813230-9813274     | NA | -0.533 | 3.50E-05        | -0.005 |                | 1 |
| SE | TMEM161B-  | + | chr5:88287435-88287622    | NA | -0.534 | 8.81E-13        | -0.039 |                | 1 |
| SE | CADM2      | + | chr3:85979163-85979283    | NA | -0.535 | 5.93E-06        | -0.15  |                | 1 |
| SE | MORC2      | - | chr22:30963224-30963334   | NA | -0.537 | 0.006121948866  | -0.054 |                | 1 |
| SE | TMEM161B-  | + | chr5:88283009-88283086    | NA | -0.54  | 1.95E-07        | -0.031 |                | 1 |
| SE | RP11-705C' | + | chr12:9656567-9656697     | NA | -0.542 | 4.86E-07        | -0.017 |                | 1 |
| SE | POLL       | - | chr10:101584877-101584919 | NA | -0.548 | 0.001950407967  | 0.128  |                | 1 |
| SE | U2AF1L4    | - | chr19:35744490-35744540   | NA | -0.55  | 1.56E-09        | -0.001 |                | 1 |
| SE | SOS1       | - | chr2:38989269-38989314    | NA | -0.553 | 2.09E-06        | -0.225 | 2.43E-11       |   |
| SE | MAX        | - | chr14:65077562-65077643   | NA | -0.553 | 1.66E-10        | -0.031 |                | 1 |
| SE | ZNF189     | + | chr9:101399394-101399530  | NA | -0.554 | 9.33E-10        | -0.028 |                | 1 |
| SE | EXO1       | + | chr1:241849108-241849216  | NA | -0.555 | 0               | -0.111 |                | 1 |
| SE | SLCO4A1    | + | chr20:62668154-62668184   | NA | -0.556 | 0.0006103010624 | -0.115 |                | 1 |
| SE | CNOT2      | + | chr12:70285399-70285586   | NA | -0.556 | 8.05E-05        | 0.02   | 0.7382928969   |   |
| SE | RSG1       | - | chr1:16232892-16233017    | NA | -0.557 | 5.59E-05        | -0.135 | 0.000196399903 |   |
| SE | RP11-371E8 | + | chr14:93188892-93188997   | NA | -0.557 | 0.0008231927538 | -0.117 |                | 1 |
| SE | PPRC1      | + | chr10:102145019-102145090 | NA | -0.558 | 7.52E-13        | 0.008  |                | 1 |
| SE | FAM86EP    | - | chr4:3946625-3946939      | NA | -0.559 | 5.49E-05        | 0.004  |                | 1 |
| SE | NDUFB2     | + | chr7:140700869-140700959  | NA | -0.561 | 1.31E-05        | -0.02  |                | 1 |
| SE | SDHAP2     | + | chr3:195663623-195663767  | NA | -0.572 | 0               | 0.056  |                | 1 |
| SE | TRIM16     | - | chr17:15681050-15681222   | NA | -0.577 | 0.006143326895  | -0.231 |                | 1 |
| SE | NBR2       | + | chr17:43132955-43133137   | NA | -0.583 | 2.65E-07        | 0.028  |                | 1 |
| SE | FDFT1      | + | chr8:11803090-11803225    | NA | -0.595 | 1.01E-05        | -0.125 |                | 1 |
| SE | RPL17-C18c | - | chr18:49488499-49488566   | NA | -0.596 | 0               | -0.006 |                | 0 |
| SE | TEAD1      | + | chr11:12878888-12878900   | NA | -0.599 | 8.25E-14        | -0.099 |                | 1 |
| SE | CLEC16A    | + | chr16:11174153-11174277   | NA | -0.601 | 0.001796423469  | 0.044  | 0.00696067509  |   |
| SE | C5orf45    | - | chr5:179851242-179851424  | NA | -0.604 | 1.26E-05        | -0.111 |                | 1 |
| SE | MROH8      | - | chr20:37155062-37155167   | NA | -0.609 | 0.001277328111  | 0.013  |                | 1 |
| SE | CPT1B      | - | chr22:50573807-50573921   | NA | -0.61  | 4.70E-13        | -0.076 | 0.03505798078  |   |
| SE | PPP2R3C    | - | chr14:35108138-35108236   | NA | -0.611 | 5.99E-06        | -0.033 |                | 1 |
| SE | TWF1       | - | chr12:43805830-43805885   | NA | -0.612 | 8.15E-05        | -0.003 |                | 1 |
| SE | AC074286.1 | - | chr2:177332141-177332251  | NA | -0.616 | 6.59E-11        | 0.033  | 0.7292808135   |   |

|    |            |   |                           |    |        |                 |        |                 |   |
|----|------------|---|---------------------------|----|--------|-----------------|--------|-----------------|---|
| SE | PAQR6      | - | chr1:156247509-156247632  | NA | -0.619 | 4.35E-07        | 0.008  |                 | 1 |
| SE | TPT1-AS1   | + | chr13:45360140-45360239   | NA | -0.619 | 0.004168487247  | -0.044 |                 | 1 |
| SE | NDUFB2     | + | chr7:140700869-140700959  | NA | -0.623 | 7.31E-06        | -0.014 |                 | 1 |
| SE | KIAA1468   | + | chr18:62280359-62280442   | NA | -0.631 | 9.58E-12        | -0.034 |                 | 1 |
| SE | OSBPL6     | + | chr2:178339671-178339764  | NA | -0.635 | 0               | 0.009  |                 | 1 |
| SE | RP11-33B1. | + | chr4:119543752-119543845  | NA | -0.635 | 0.0005024837576 | 0.071  | 0.3209474617    | 1 |
| SE | FAM86B3P   | + | chr8:8234482-8234584      | NA | -0.64  | 0.01525821969   | -0.058 |                 | 1 |
| SE | MCOLN3     | - | chr1:85036709-85036868    | NA | -0.648 | 3.05E-06        | 0.051  |                 | 1 |
| SE | RAI14      | + | chr5:34813573-34813660    | NA | -0.649 | 0               | -0.022 |                 | 1 |
| SE | SNHG14     | + | chr15:25053265-25053363   | NA | -0.65  | 2.78E-07        | -0.092 |                 | 1 |
| SE | CTD-2378E  | - | chr15:50890855-50891077   | NA | -0.655 | 0.02204339488   | -0.014 |                 | 1 |
| SE | SYTL2      | - | chr11:85711112-85711232   | NA | -0.66  | 0               | -0.056 |                 | 1 |
| SE | DYRK4      | + | chr12:4580823-4580977     | NA | -0.667 | 0.002780083212  | 0.06   |                 | 1 |
| SE | C14orf93   | - | chr14:23000958-23001031   | NA | -0.667 | 3.29E-05        | 0.011  |                 | 1 |
| SE | SLTM       | - | chr15:58912562-58912610   | NA | -0.667 | 1.22E-05        | 0.03   |                 | 1 |
| SE | RGMB-AS1   | - | chr5:98771655-98771766    | NA | -0.667 | 2.10E-07        | 0.219  |                 | 1 |
| SE | ACACA      | - | chr17:37345252-37345382   | NA | -0.667 | 0.003589770542  | 0.457  |                 | 1 |
| SE | RP11-1228E | - | chr17:71365-71556         | NA | -0.667 | 0.001952422279  | -0.065 |                 | 1 |
| SE | PLA2G12A   | - | chr4:109718688-109718759  | NA | -0.67  | 7.20E-06        | -0.047 | 0.7537550146    | 1 |
| SE | OSBPL6     | + | chr2:178339671-178339764  | NA | -0.671 | 0.0005646569594 | -0.099 |                 | 1 |
| SE | APITD1-COI | + | chr1:10440346-10440413    | NA | -0.673 | 0.001998768924  | -0.151 |                 | 1 |
| SE | FNTB       | + | chr14:65032358-65032521   | NA | -0.679 | 5.36E-09        | 0.005  | 0.001500651941  | 1 |
| SE | C2CD5      | - | chr12:22519114-22519239   | NA | -0.69  | 9.33E-06        | 0.135  |                 | 1 |
| SE | FKTN       | + | chr9:105574197-105574332  | NA | -0.692 | 0               | -0.095 |                 | 1 |
| SE | ADD3       | + | chr10:110132304-110132400 | NA | -0.694 | 0               | -0.006 |                 | 1 |
| SE | SPAST      | + | chr2:32098795-32098891    | NA | -0.697 | 5.59E-14        | -0.233 | 2.79E-10        | 1 |
| SE | KIF13A     | - | chr6:17789871-17789910    | NA | -0.706 | 0               | -0.13  | 0.0001637023178 | 1 |
| SE | HKR1       | + | chr19:37346887-37347052   | NA | -0.712 | 1.03E-06        | 0.023  | 0.17022336      | 1 |
| SE | SERHL2     | + | chr22:42573633-42573745   | NA | -0.73  | 1.31E-09        | 0.082  |                 | 1 |
| SE | DUSP18     | - | chr22:30664954-30665121   | NA | -0.738 | 1.14E-10        | -0.022 |                 | 1 |
| SE | IST1       | + | chr16:71903164-71903258   | NA | -0.742 | 0.0002334056595 | 0.029  |                 | 1 |
| SE | C2orf74    | + | chr2:61157861-61158012    | NA | -0.743 | 1.09E-09        | -0.012 |                 | 1 |
| SE | CRHR1-IT1  | + | chr17:45640388-45640455   | NA | -0.754 | 3.26E-07        | -0.012 |                 | 1 |
| SE | NRG2       | - | chr5:139871043-139871148  | NA | -0.776 | 0.0003004649703 | 0.166  |                 | 1 |
| SE | LPP        | + | chr3:188341662-188341719  | NA | -0.778 | 1.83E-09        | -0.094 |                 | 1 |
| SE | EMC3-AS1   | + | chr3:9988371-9988477      | NA | -0.782 | 3.23E-08        | -0.089 |                 | 1 |
| SE | HKR1       | + | chr19:37344609-37344774   | NA | -0.782 | 7.85E-07        | -0.013 |                 | 1 |
| SE | RP11-849H4 | - | chr11:71925932-71926104   | NA | -0.787 | 4.30E-07        | 0.021  |                 | 1 |
| SE | TWF1       | - | chr12:43805523-43805637   | NA | -0.789 | 4.38E-08        | -0.001 |                 | 1 |
| SE | FRG1B      | + | chr20:30391196-30391308   | NA | -0.796 | 0               | 0      |                 | 1 |
| SE | TCF7L2     | + | chr10:113160618-113160691 | NA | -0.805 | 0.0001537967219 | -0.105 | 0.5033618553    | 1 |
| SE | ARIH2      | + | chr3:48945135-48945181    | NA | -0.852 | 0               | -0.041 | 0.8091615025    | 1 |
| SE | GPR126     | + | chr6:142383759-142383843  | NA | -0.871 | 0               | 0.102  |                 | 1 |
| SE | PCTP       | + | chr17:55787565-55787654   | NA | -0.874 | 0               | -0.116 |                 | 1 |
| SE | XPNPEP3    | + | chr22:40860677-40860793   | NA | -0.881 | 5.32E-13        | 0.019  |                 | 1 |
| SE | SLC27A5    | - | chr19:58481063-58481187   | NA | -0.897 | 3.04E-05        | -0.007 |                 | 1 |
| SE | WBP1       | + | chr2:74458831-74458919    | NA | -0.968 | 1.34E-13        | -0.05  |                 | 1 |



**Supplementary Table 5:** Differentially expressed (multi-exon) genes between mesenchymal (MES) and proneural (PN) GSCs.

| Up-regulated genes in MES (down-regulated in PN) |                |          |
|--------------------------------------------------|----------------|----------|
| gene                                             | log2FoldChange | FDR      |
| ANPEP                                            | 10.37672335    | 1.99E-70 |
| CDCP1                                            | 10.40751179    | 4.38E-70 |
| SLFN11                                           | 10.60639843    | 5.23E-70 |
| FOSL1                                            | 6.627260714    | 6.26E-67 |
| TGM2                                             | 8.0496362      | 2.47E-62 |
| ALDH1A3                                          | 9.693668267    | 4.46E-58 |
| CTSZ                                             | 9.232888351    | 3.20E-56 |
| FGF5                                             | 9.914601859    | 9.77E-56 |
| MDFIC                                            | 8.245710663    | 1.49E-53 |
| DNAH14                                           | 9.92104056     | 1.48E-51 |
| HTATIP2                                          | 9.580435866    | 1.73E-51 |
| NPTX1                                            | 9.466385946    | 5.90E-48 |
| PROCR                                            | 6.359394042    | 3.17E-47 |
| C4orf32                                          | 9.223157055    | 2.46E-46 |
| PLBD1                                            | 9.361245145    | 1.24E-45 |
| MAGEB2                                           | 10.47706157    | 4.67E-45 |
| DGKE                                             | 4.657100071    | 1.82E-42 |
| TNFRSF10D                                        | 9.844729806    | 5.15E-42 |
| EGR1                                             | 5.868025559    | 5.36E-42 |
| MAGEA6                                           | 8.868855162    | 2.48E-41 |
| STEAP2                                           | 10.03667625    | 3.45E-41 |
| SAGE1                                            | 9.807227223    | 3.65E-41 |
| TUSC3                                            | 10.13746076    | 3.85E-41 |
| BAIAP2L1                                         | 6.367793984    | 1.04E-40 |
| MAGEA12                                          | 8.887703501    | 2.63E-40 |
| PLAC8                                            | 8.325223787    | 1.25E-39 |
| SSH3                                             | 6.341574541    | 1.85E-39 |
| PCDHGA2                                          | 6.176337738    | 7.07E-39 |
| ME1                                              | 9.99547059     | 1.63E-37 |
| MAGEA3                                           | 9.20938161     | 2.18E-37 |
| AIM1                                             | 4.484574169    | 2.27E-37 |
| KRT8                                             | 9.674670956    | 7.60E-37 |
| DSP                                              | 8.731780312    | 1.50E-36 |
| ADIRF-AS1                                        | 8.146945972    | 3.93E-36 |
| EFEMP1                                           | 10.94104935    | 1.18E-35 |
| TMEM200A                                         | 8.154277392    | 2.21E-35 |
| PRAME                                            | 11.30299762    | 2.28E-34 |
| CENPV                                            | 6.07890014     | 5.41E-34 |
| LY6K                                             | 9.042398443    | 1.69E-33 |
| TNNT1                                            | 7.367167158    | 2.31E-33 |
| AP1M2                                            | 8.676689761    | 2.52E-33 |
| CARD10                                           | 3.768033105    | 3.49E-33 |
| TPTEP1                                           | 8.710320898    | 4.75E-33 |
| NFE4                                             | 9.976464198    | 6.41E-33 |
| TRIML2                                           | 11.22848393    | 7.02E-33 |
| CCNA1                                            | 7.873729163    | 3.98E-32 |
| KCNC4                                            | 5.727273687    | 8.91E-32 |
| LRRK1                                            | 8.571496039    | 1.06E-31 |
| MTUS2                                            | 10.68290418    | 9.40E-31 |
| RP11-169F17.1                                    | 9.033911847    | 1.37E-30 |
| SH2D5                                            | 6.059762317    | 1.63E-30 |
| VRK2                                             | 8.89492723     | 2.36E-30 |
| KIAA1324L                                        | 6.036329732    | 2.36E-30 |
| FAT4                                             | 6.403587108    | 2.76E-30 |
| CDYL2                                            | 4.09893842     | 3.66E-30 |
| DOCK5                                            | 9.951895733    | 4.36E-30 |
| TRIM59                                           | 8.908310705    | 4.97E-30 |
| KATNAL1                                          | 3.923730963    | 2.47E-29 |
| ANKRD19P                                         | 9.505126862    | 4.11E-29 |
| HYI                                              | 4.717152425    | 4.55E-29 |
| RAB11FIP1                                        | 7.786360457    | 5.32E-29 |
| BNC1                                             | 9.628933752    | 7.03E-29 |
| SLC6A15                                          | 10.63090322    | 8.52E-29 |

| Down-regulated genes in MES (up-regulated in PN) |                |           |
|--------------------------------------------------|----------------|-----------|
| gene                                             | log2FoldChange | FDR       |
| GPM6B                                            | -10.7108866    | 3.53E-127 |
| XIST                                             | -10.22135421   | 1.92E-94  |
| S100B                                            | -11.42490738   | 4.02E-86  |
| PTPN12                                           | -9.999474471   | 2.84E-81  |
| PDE4B                                            | -9.699042881   | 7.76E-74  |
| PMP2                                             | -10.52753001   | 1.69E-69  |
| COL11A1                                          | -9.852666093   | 2.15E-68  |
| ARNT2                                            | -9.154545309   | 4.87E-65  |
| PTPRZ1                                           | -10.28835018   | 1.65E-64  |
| PRTFDC1                                          | -10.00667187   | 1.29E-63  |
| KCNJ10                                           | -9.87928151    | 2.84E-63  |
| GLUL                                             | -10.26958145   | 1.42E-61  |
| KCNA2                                            | -10.10043006   | 1.60E-61  |
| NRN1                                             | -6.728159335   | 6.09E-58  |
| FEZ1                                             | -10.17148472   | 4.86E-57  |
| BCAN                                             | -10.28913039   | 4.13E-56  |
| EDNRB                                            | -10.41573472   | 1.47E-55  |
| PRRX1                                            | -10.14033503   | 1.39E-54  |
| ZNF532                                           | -10.70904731   | 7.97E-54  |
| ARL10                                            | -8.203124291   | 9.15E-54  |
| THY1                                             | -10.7581076    | 3.55E-53  |
| PCDH15                                           | -9.315194192   | 3.32E-52  |
| LAMA4                                            | -10.27567243   | 3.49E-52  |
| FXND6                                            | -9.91321044    | 1.22E-51  |
| OLIG2                                            | -10.26687569   | 3.17E-50  |
| C16orf62                                         | -5.362219583   | 8.72E-50  |
| NLGN3                                            | -7.881961442   | 1.09E-49  |
| GJA1                                             | -10.83161779   | 4.49E-46  |
| TUBB2B                                           | -10.34902154   | 4.63E-46  |
| PDE7B                                            | -7.554988903   | 1.01E-45  |
| LSAMP                                            | -11.09310763   | 2.38E-45  |
| JAM3                                             | -10.09854089   | 3.23E-45  |
| VCAN                                             | -10.59791853   | 6.34E-45  |
| GNG2                                             | -10.37731504   | 2.35E-44  |
| SEMA5A                                           | -8.620146667   | 2.59E-44  |
| LPL                                              | -10.86010733   | 5.94E-44  |
| SLC35F1                                          | -9.913492707   | 1.09E-43  |
| OLIG1                                            | -10.4094014    | 1.77E-43  |
| CSPG4                                            | -9.981876495   | 1.87E-43  |
| MATN2                                            | -5.727630561   | 5.55E-43  |
| SOX2-OT                                          | -9.101572388   | 5.55E-43  |
| ANGPTL2                                          | -10.21874552   | 2.80E-42  |
| LOXL3                                            | -8.960420753   | 6.74E-42  |
| MMP2                                             | -10.58258811   | 1.13E-41  |
| ZNF608                                           | -8.890494985   | 3.60E-41  |
| ZNF354C                                          | -6.988507908   | 3.01E-40  |
| FREM2                                            | -5.34289419    | 1.36E-39  |
| ZNF300                                           | -11.00747094   | 4.33E-39  |
| SALL1                                            | -10.58666471   | 5.44E-39  |
| SFRP2                                            | -10.44066802   | 7.92E-39  |
| PLEKHG1                                          | -5.313309705   | 1.25E-38  |
| CADM1                                            | -10.13968566   | 2.92E-38  |
| MAP2                                             | -8.550779268   | 1.24E-37  |
| SEMA6D                                           | -10.74443082   | 2.38E-37  |
| MPHOSPH8                                         | -9.960201482   | 2.46E-37  |
| ZNF334                                           | -9.167076066   | 2.52E-37  |
| MDFI                                             | -9.446982379   | 2.61E-37  |
| CELF2                                            | -9.197588986   | 3.31E-37  |
| ZNF736                                           | -10.01302976   | 3.31E-37  |
| SULF2                                            | -9.432349657   | 3.40E-37  |
| ARRDC4                                           | -9.922042555   | 9.19E-37  |
| ZNF542P                                          | -8.241290774   | 1.08E-36  |
| FGFBP3                                           | -4.890933756   | 1.31E-36  |

|               |             |          |              |              |          |
|---------------|-------------|----------|--------------|--------------|----------|
| RP11-29H23.5  | 5.503680744 | 1.10E-28 | SETD6        | -7.381658324 | 1.68E-36 |
| EGFR          | 8.054984625 | 2.38E-28 | SCRG1        | -11.00534551 | 2.13E-36 |
| GALNT6        | 9.520782009 | 5.22E-28 | ANK3         | -5.405543463 | 3.28E-36 |
| KRT18         | 10.48646723 | 8.62E-28 | KBTBD2       | -10.16136065 | 3.63E-36 |
| SYT1          | 9.182934052 | 9.78E-28 | VANGL2       | -10.05992989 | 4.66E-36 |
| STEAP1B       | 7.740812364 | 1.01E-27 | DZIP1        | -10.41702861 | 7.91E-36 |
| ZDHC23        | 5.825985955 | 1.38E-27 | EMILIN2      | -9.817925615 | 1.18E-35 |
| MEIOC         | 10.28027997 | 2.24E-27 | MLLT11       | -3.661895834 | 1.41E-35 |
| ADM2          | 8.178556601 | 3.47E-27 | LINC00511    | -4.72758947  | 8.94E-35 |
| RUNX3         | 7.918046976 | 1.00E-26 | PCDHGC3      | -8.35313208  | 1.06E-34 |
| FAM83G        | 8.138353029 | 2.19E-26 | ARMCX4       | -9.554212362 | 1.39E-34 |
| TES           | 11.5895949  | 2.98E-26 | ZNF883       | -7.861048753 | 2.51E-34 |
| CASP4         | 5.47407291  | 5.91E-26 | CPXM1        | -10.59310884 | 2.90E-34 |
| MIPEP         | 3.630105065 | 6.82E-26 | GAS7         | -10.61413097 | 3.24E-34 |
| ANKRD27       | 3.621652629 | 2.55E-25 | TTYH1        | -9.274951487 | 3.37E-34 |
| NIPAL2        | 8.36324125  | 1.11E-24 | ZNF426       | -6.550993203 | 3.83E-34 |
| ATP1A3        | 6.239698946 | 1.15E-24 | RFTN2        | -9.486571459 | 3.83E-34 |
| CADPS2        | 8.128795909 | 1.94E-24 | SALL3        | -9.484263493 | 7.54E-34 |
| STAMBPL1      | 6.804542538 | 2.61E-24 | SOX5         | -10.44884347 | 8.88E-34 |
| FAM167A       | 6.998362133 | 4.32E-24 | TNS2         | -5.274985934 | 1.11E-33 |
| MAP3K21       | 4.424497619 | 5.59E-24 | ELOVL2       | -10.50214959 | 1.29E-33 |
| ASPHD1        | 6.064175804 | 9.89E-24 | FAXDC2       | -8.26761745  | 6.82E-33 |
| SPAG1         | 4.676396214 | 1.16E-23 | LINC00665    | -6.508442983 | 2.47E-32 |
| MAT1A         | 7.790193181 | 1.41E-23 | COL15A1      | -9.540643455 | 3.01E-32 |
| FRG1CP        | 5.838530862 | 2.66E-23 | ZNF93        | -6.992893798 | 5.30E-32 |
| MIR222HG      | 4.064738431 | 3.46E-23 | ZCCHC24      | -3.633322916 | 5.98E-32 |
| IER3          | 8.701544953 | 4.32E-23 | DISC1        | -7.749702677 | 6.46E-32 |
| CHAC1         | 5.281574911 | 4.60E-23 | AEBP1        | -10.00012064 | 7.06E-32 |
| PRKCH         | 6.334595303 | 7.52E-23 | SALL2        | -10.13047648 | 7.18E-32 |
| DUSP23        | 7.170341232 | 7.62E-23 | CHFR         | -4.3815182   | 1.70E-31 |
| RP11-66B24.7  | 8.978200339 | 8.13E-23 | ZNF585B      | -5.896946498 | 2.98E-31 |
| GBP3          | 5.910045439 | 1.02E-22 | GNG7         | -3.592546789 | 5.58E-31 |
| CATSPER1      | 7.986893223 | 1.24E-22 | COL9A3       | -10.84611674 | 7.89E-31 |
| ECHDC2        | 6.681644148 | 1.60E-22 | SV2A         | -10.50705791 | 8.45E-31 |
| DENND2C       | 5.835339136 | 2.82E-22 | PNMAL1       | -10.66805759 | 1.01E-30 |
| ALS2CL        | 6.818265014 | 3.48E-22 | GPRC5B       | -6.25402465  | 1.37E-30 |
| GALNT14       | 9.829325991 | 3.89E-22 | PCDH17       | -7.346332956 | 1.62E-30 |
| LTBR          | 11.6375772  | 4.79E-22 | SNTB1        | -10.72263333 | 1.78E-30 |
| G0S2          | 7.105369181 | 5.12E-22 | METTL7A      | -10.00097875 | 2.29E-30 |
| ZYG11A        | 9.298223962 | 8.93E-22 | PPP1R9A      | -10.27095545 | 3.18E-30 |
| AOX1          | 7.880765933 | 9.45E-22 | CGREF1       | -8.270353768 | 5.04E-30 |
| TPM2          | 4.718007161 | 1.31E-21 | PROM1        | -9.594418494 | 2.08E-29 |
| DMKN          | 10.85795198 | 2.40E-21 | ZNF431       | -10.57495506 | 5.15E-29 |
| NME7          | 3.184804872 | 4.21E-21 | SOX8         | -10.61991431 | 6.31E-29 |
| ZFP69         | 6.679942664 | 5.57E-21 | CALD1        | -6.980993502 | 7.17E-29 |
| RASGEF1A      | 11.32825721 | 6.39E-21 | CCDC149      | -9.605882251 | 1.74E-28 |
| SELENOM       | 6.401009234 | 7.38E-21 | FRMD5        | -3.470142481 | 2.15E-28 |
| MAP7          | 5.298952006 | 9.52E-21 | DNAH9        | -10.38475554 | 3.92E-28 |
| SIK1          | 4.775276041 | 1.51E-20 | AIF1L        | -6.580842703 | 5.14E-28 |
| IL4R          | 8.482273784 | 1.84E-20 | IGFBP2       | -8.857058782 | 6.29E-28 |
| EMB           | 11.61506186 | 2.13E-20 | TP73-AS1     | -8.380778075 | 9.40E-28 |
| SERPINB9      | 8.0080179   | 2.24E-20 | DDX19B       | -7.00083471  | 1.38E-27 |
| PPARG         | 8.888484141 | 2.51E-20 | ZNF43        | -10.46143831 | 1.44E-27 |
| KCNG1         | 6.44977673  | 2.70E-20 | TNS1         | -7.553817513 | 1.59E-27 |
| MPP7          | 5.703107201 | 3.90E-20 | PTN          | -7.544921187 | 9.51E-27 |
| TNFRSF10A     | 11.17295269 | 6.54E-20 | PAG1         | -6.013691688 | 1.28E-26 |
| CTGF          | 5.860050234 | 1.69E-19 | FLRT3        | -9.404052833 | 1.57E-26 |
| PMAIP1        | 5.786364675 | 1.71E-19 | ELMO1        | -10.38645852 | 1.57E-26 |
| CSAG1         | 10.39534479 | 2.24E-19 | HUNK         | -8.59894225  | 1.94E-26 |
| LINC00960     | 10.26330846 | 2.66E-19 | GTF2I        | -3.536858275 | 1.97E-26 |
| IL7           | 6.924790947 | 2.84E-19 | ARHGEF7      | -3.169599061 | 2.19E-26 |
| RERG          | 6.463962203 | 2.84E-19 | CERS6        | -11.63716116 | 2.20E-26 |
| NIPAL1        | 5.786889744 | 3.62E-19 | FAM222A      | -4.446160383 | 2.27E-26 |
| PTPRH         | 6.884909544 | 3.71E-19 | GREB1        | -4.58141535  | 6.44E-26 |
| PARP4         | 3.664220502 | 3.83E-19 | COL20A1      | -8.507407137 | 2.20E-25 |
| TPBG          | 10.9432167  | 3.92E-19 | RP11-43F13.1 | -5.493523604 | 2.46E-25 |
| RP11-420A23.1 | 3.684649121 | 4.13E-19 | LINC00461    | -4.071773964 | 3.20E-25 |
| FLT4          | 11.1406747  | 5.10E-19 | GATM         | -6.081612298 | 3.42E-25 |

|              |             |          |            |              |          |
|--------------|-------------|----------|------------|--------------|----------|
| TRIM58       | 9.157004469 | 5.22E-19 | ZNF521     | -9.053771583 | 6.87E-25 |
| SLC7A1       | 4.685882218 | 6.19E-19 | TCF4       | -6.396944488 | 9.15E-25 |
| PCK2         | 4.053455228 | 9.70E-19 | PCYT1B     | -9.739303728 | 1.14E-24 |
| LINC00470    | 10.06050549 | 1.29E-18 | STK32B     | -9.948259043 | 1.30E-24 |
| CECR7        | 6.053854562 | 1.36E-18 | C8orf46    | -7.552860078 | 1.30E-24 |
| LINC01123    | 7.706435703 | 1.45E-18 | MAPK10     | -5.577673238 | 2.41E-24 |
| SERPINB1     | 6.875822023 | 1.82E-18 | SATB1      | -8.151615527 | 2.44E-24 |
| LRRC3        | 10.06294273 | 2.15E-18 | SLIT1      | -8.858801125 | 2.97E-24 |
| BCL2A1       | 9.578396942 | 2.28E-18 | C3orf70    | -9.879811433 | 4.32E-24 |
| MYPN         | 7.765391721 | 2.87E-18 | DGKI       | -8.056519559 | 4.98E-24 |
| RANBP17      | 9.991459436 | 3.49E-18 | ID4        | -9.676126145 | 5.08E-24 |
| LINC01436    | 9.962790407 | 3.64E-18 | FUZ        | -5.489171703 | 6.01E-24 |
| CHMP4C       | 10.67411186 | 4.88E-18 | ASIC4      | -7.363346329 | 6.89E-24 |
| PCBD1        | 2.576167751 | 4.88E-18 | MEGF10     | -7.723854206 | 8.88E-24 |
| LINC00707    | 8.816289946 | 5.03E-18 | KCNIP1     | -10.4081515  | 1.00E-23 |
| RCN3         | 4.914377718 | 5.39E-18 | FAM49A     | -9.702722105 | 1.06E-23 |
| NMU          | 5.767828016 | 5.93E-18 | TMEM246    | -9.921678381 | 1.46E-23 |
| SLFN12       | 9.859558309 | 6.30E-18 | BMPR1B     | -8.276208211 | 1.75E-23 |
| PLA2G16      | 3.456964396 | 6.33E-18 | NLGN4X     | -11.23965927 | 2.53E-23 |
| BTNL9        | 10.55411173 | 6.77E-18 | DTX3       | -9.417946781 | 2.67E-23 |
| CTC-459F4.3  | 2.972995332 | 7.19E-18 | PPP1R14C   | -11.01184836 | 2.80E-23 |
| MGST1        | 8.323798165 | 7.62E-18 | TET1       | -9.264971076 | 4.27E-23 |
| CT45A10      | 9.842596013 | 8.52E-18 | IFFO1      | -8.216836297 | 5.09E-23 |
| ADAMTS20     | 6.395726259 | 8.90E-18 | ZNF738     | -11.13900474 | 6.12E-23 |
| CD40         | 9.848257012 | 9.59E-18 | ZNF382     | -7.315329042 | 6.23E-23 |
| ANKRD18A     | 9.840397959 | 9.59E-18 | SEMA5B     | -8.997057749 | 6.86E-23 |
| MLPH         | 9.97898411  | 1.03E-17 | LGI2       | -9.662332607 | 6.86E-23 |
| AC005301.9   | 10.40930029 | 1.21E-17 | HSD17B7P2  | -4.537758875 | 7.26E-23 |
| SPAG4        | 4.83178205  | 1.24E-17 | NIM1K      | -6.896650699 | 7.95E-23 |
| POPDC3       | 10.70298984 | 1.47E-17 | PEG3       | -9.771631465 | 9.70E-23 |
| H2AFJ        | 10.10846556 | 1.58E-17 | U2AF1      | -4.008162325 | 1.11E-22 |
| TNFAIP2      | 4.579302989 | 1.82E-17 | KLHL13     | -7.731430076 | 1.55E-22 |
| ELL2         | 4.370510164 | 1.84E-17 | LRRN3      | -9.781411133 | 1.99E-22 |
| TBX18        | 10.55129888 | 1.88E-17 | ZNF506     | -9.665650226 | 3.80E-22 |
| RP11-30P6.6  | 5.681131516 | 2.14E-17 | JAKMIP2    | -9.286124584 | 4.60E-22 |
| LDHC         | 7.827302255 | 2.32E-17 | HR         | -8.47755102  | 4.64E-22 |
| AC003092.1   | 10.50044544 | 3.23E-17 | B3GAT1     | -10.73660002 | 7.25E-22 |
| PDE2A        | 7.539356435 | 3.24E-17 | ZNF558     | -10.88040244 | 8.30E-22 |
| MAN1A1       | 5.994690759 | 3.81E-17 | BCHE       | -6.773798862 | 2.14E-21 |
| LINC00857    | 8.351658274 | 5.01E-17 | SPARC      | -9.925643879 | 2.19E-21 |
| PPP4R4       | 6.434039894 | 5.47E-17 | GOLGA8A    | -4.239484651 | 2.24E-21 |
| EPHA6        | 10.32105983 | 5.55E-17 | MIR34AHG   | -7.151118111 | 2.77E-21 |
| HS3ST3A1     | 8.286553592 | 5.75E-17 | PDGFRA     | -7.789961156 | 3.32E-21 |
| WDR66        | 6.426849601 | 7.31E-17 | UNC80      | -6.892903517 | 3.32E-21 |
| RP5-884M6.1  | 9.72557049  | 8.11E-17 | FYN        | -2.80300083  | 3.86E-21 |
| TRHDE        | 10.225134   | 1.02E-16 | FABP7      | -10.09407029 | 4.62E-21 |
| MME          | 7.580851253 | 1.13E-16 | COL25A1    | -9.871205098 | 5.67E-21 |
| IL31RA       | 10.29331539 | 1.31E-16 | LRRC17     | -9.852956937 | 7.20E-21 |
| GATA2        | 7.564511382 | 1.87E-16 | RNF175     | -10.6522121  | 7.91E-21 |
| GFPT2        | 3.789043114 | 2.39E-16 | NID2       | -10.74102599 | 8.89E-21 |
| CXCL5        | 9.88726771  | 2.48E-16 | EPDR1      | -10.62044559 | 9.54E-21 |
| MYEOV        | 6.72909767  | 2.78E-16 | CD200      | -7.121530413 | 1.07E-20 |
| POP4         | 2.558240582 | 3.06E-16 | ATCAY      | -8.890513603 | 1.24E-20 |
| ZC3H12B      | 10.03520897 | 3.13E-16 | ARHGEF6    | -8.800450871 | 1.25E-20 |
| RP11-366H4.1 | 10.03231099 | 3.19E-16 | TBCEL      | -10.51166637 | 1.63E-20 |
| LYPD5        | 6.057885385 | 3.45E-16 | LRRTM2     | -8.257057854 | 1.96E-20 |
| DMC1         | 4.532516677 | 3.59E-16 | PTPRO      | -9.49242516  | 2.01E-20 |
| ZNF215       | 10.02543514 | 3.62E-16 | SEMA6A     | -3.721909589 | 2.06E-20 |
| EXT1         | 3.434408515 | 3.92E-16 | BRSK2      | -9.124951221 | 2.23E-20 |
| CCDC68       | 8.224374394 | 3.99E-16 | TNFAIP6    | -11.87449937 | 2.51E-20 |
| ALOXE3       | 7.381877954 | 4.18E-16 | MBNL3      | -7.840253782 | 2.85E-20 |
| UQCRRF51     | 2.88582042  | 4.45E-16 | DPYSL2     | -3.285516338 | 3.22E-20 |
| TMEM156      | 9.559318585 | 5.31E-16 | ZNF577     | -4.719904165 | 4.14E-20 |
| IRF5         | 7.00966284  | 5.34E-16 | NFATC4     | -9.281561952 | 4.66E-20 |
| FAM201A      | 9.935176618 | 5.54E-16 | RHOJ       | -8.207722309 | 4.68E-20 |
| LINC01249    | 9.35697513  | 5.98E-16 | AC074289.1 | -6.611724699 | 5.13E-20 |
| ARHGAP44     | 9.385450595 | 6.31E-16 | DOCK10     | -5.317664304 | 5.21E-20 |
| CSAG3        | 9.420240009 | 6.95E-16 | ZNF254     | -3.300071439 | 5.92E-20 |

|               |             |          |           |              |          |
|---------------|-------------|----------|-----------|--------------|----------|
| FBXL13        | 4.073630031 | 7.04E-16 | SHISA4    | -8.252074567 | 6.07E-20 |
| RP11-497G19.1 | 7.366430786 | 7.63E-16 | BAALC     | -9.8394667   | 8.66E-20 |
| RP11-108M9.4  | 6.808368938 | 8.17E-16 | MAF       | -9.360820864 | 9.09E-20 |
| IRX2          | 9.879670091 | 1.04E-15 | SCN4B     | -7.319101004 | 1.11E-19 |
| TM4SF19       | 8.107684931 | 1.12E-15 | SLITRK2   | -10.04752805 | 1.22E-19 |
| UBR5-AS1      | 3.568858858 | 1.20E-15 | CHDH      | -8.279875292 | 1.35E-19 |
| ARNTL2        | 3.112129098 | 1.27E-15 | ZNF737    | -7.790571748 | 1.36E-19 |
| CD55          | 6.416076487 | 1.55E-15 | MAGI2     | -4.699332574 | 1.77E-19 |
| HLA-F         | 3.785726115 | 1.74E-15 | EFS       | -11.71719437 | 2.19E-19 |
| ECHDC3        | 9.916313073 | 1.95E-15 | ZNF529    | -10.37140739 | 2.19E-19 |
| LINC00944     | 9.821144795 | 2.02E-15 | ZNF85     | -8.923181435 | 2.41E-19 |
| HHEX          | 9.284678213 | 2.09E-15 | CEP41     | -2.976284071 | 2.58E-19 |
| RP11-148B18.4 | 9.230758474 | 2.71E-15 | KLHDC8B   | -5.177604003 | 2.70E-19 |
| TEC           | 9.788127266 | 2.87E-15 | SHROOM2   | -9.25792332  | 3.70E-19 |
| MPC2          | 2.217026581 | 2.91E-15 | TRPM3     | -9.023382272 | 4.07E-19 |
| LINC01139     | 9.226548995 | 3.83E-15 | ZNF853    | -9.488504741 | 4.76E-19 |
| ARHGAP18      | 2.894816636 | 4.55E-15 | CENPBD1P1 | -6.754699469 | 5.26E-19 |
| FBXO2         | 6.161180216 | 4.82E-15 | SIK3      | -2.593062937 | 5.61E-19 |
| MSC-AS1       | 7.978350409 | 5.06E-15 | ZNF100    | -10.16308062 | 6.51E-19 |
| SRGN          | 8.999051767 | 5.33E-15 | CTSF      | -10.82814364 | 8.15E-19 |
| PCDHB16       | 3.639258312 | 7.40E-15 | ZNF813    | -5.755383586 | 8.26E-19 |
| SNCA          | 9.822429782 | 7.71E-15 | PDK2      | -8.066321843 | 9.06E-19 |
| HTR7          | 9.07563604  | 8.97E-15 | GALM      | -7.069916342 | 1.19E-18 |
| KIRREL2       | 5.612867901 | 9.91E-15 | DPYSL3    | -5.057738842 | 1.22E-18 |
| LINC01605     | 7.765975334 | 1.00E-14 | FAM185A   | -6.1123909   | 1.32E-18 |
| PDCD5         | 2.815378657 | 1.13E-14 | GRIA3     | -9.675971287 | 1.44E-18 |
| TOR4A         | 5.508333968 | 1.13E-14 | HS6ST2    | -11.41136831 | 1.53E-18 |
| CASC9         | 9.550356712 | 1.20E-14 | ZNF714    | -4.260582069 | 2.14E-18 |
| RP11-66B24.2  | 9.683498973 | 1.23E-14 | SLC1A3    | -3.63981199  | 2.29E-18 |
| GABRG2        | 9.665870915 | 1.75E-14 | LGR5      | -7.870737827 | 2.81E-18 |
| ANKRD29       | 5.047227526 | 1.75E-14 | SCN1A     | -9.357026789 | 2.95E-18 |
| SLC6A17       | 9.499196799 | 1.77E-14 | GPC4      | -11.45651654 | 2.98E-18 |
| CTB-140J7.2   | 9.055864721 | 1.87E-14 | MYO5C     | -6.118861437 | 3.15E-18 |
| SLC37A1       | 3.021648762 | 1.89E-14 | PDE1C     | -8.354175503 | 3.44E-18 |
| PLCG2         | 9.590450465 | 2.05E-14 | GAL3ST4   | -6.443570621 | 3.64E-18 |
| DSE           | 2.704223603 | 2.09E-14 | ZNF677    | -9.188854358 | 3.86E-18 |
| MIR137HG      | 9.463462249 | 2.91E-14 | NACAD     | -10.5508776  | 4.41E-18 |
| RP4-647C14.2  | 9.440803875 | 3.12E-14 | ZNF528    | -10.1800793  | 8.36E-18 |
| HES7          | 4.361735502 | 3.25E-14 | LGALS3BP  | -6.121070095 | 1.03E-17 |
| RBM11         | 9.634986879 | 3.26E-14 | PYROXD2   | -6.317394309 | 1.11E-17 |
| ADGRE1        | 9.915077612 | 3.80E-14 | CTNND2    | -9.188019381 | 1.14E-17 |
| WBP2NL        | 6.031877741 | 3.81E-14 | ZNF649    | -4.239487276 | 1.14E-17 |
| RPS14         | 2.69839837  | 4.43E-14 | CYTL1     | -11.17613217 | 1.15E-17 |
| PEAR1         | 9.651199139 | 4.78E-14 | C1orf106  | -10.54470501 | 1.19E-17 |
| LINC00910     | 4.052061325 | 4.78E-14 | HNMT      | -8.373712742 | 1.46E-17 |
| ZNF185        | 4.038606758 | 4.79E-14 | STS       | -6.984349731 | 1.60E-17 |
| ANKRD20A5P    | 9.060929706 | 5.04E-14 | ZNF493    | -9.795868508 | 1.61E-17 |
| ZNF507        | 2.576833563 | 5.28E-14 | GAB1      | -3.007152327 | 1.63E-17 |
| SLC35F3       | 7.725858952 | 5.52E-14 | LINGO1    | -7.211888039 | 1.66E-17 |
| CCL28         | 9.472655039 | 5.61E-14 | TNFRSF21  | -3.469843197 | 2.52E-17 |
| TRHDE-AS1     | 9.426571735 | 5.89E-14 | MEST      | -10.35274885 | 2.57E-17 |
| MVP           | 4.607741975 | 6.03E-14 | TMEM100   | -10.92996911 | 2.82E-17 |
| VEGFC         | 8.836172741 | 6.20E-14 | GRIA2     | -6.415433296 | 3.08E-17 |
| LRRC8E        | 8.858383051 | 6.47E-14 | RNF165    | -7.209967682 | 3.16E-17 |
| XAGE1A        | 8.842575962 | 6.51E-14 | RNF182    | -10.33654376 | 3.24E-17 |
| MTMR11        | 3.003439045 | 8.69E-14 | LRRC4     | -10.7217206  | 3.37E-17 |
| TBC1D31       | 2.526802507 | 8.82E-14 | NR2F1     | -4.215252249 | 3.50E-17 |
| ADTRP         | 9.315486173 | 9.03E-14 | SETD9     | -4.251404359 | 3.77E-17 |
| SYDE2         | 2.786296789 | 9.42E-14 | ITPKB     | -9.904710761 | 3.79E-17 |
| EIF3H         | 2.355237204 | 9.92E-14 | KCNK2     | -7.243138293 | 3.93E-17 |
| RP11-129M6.1  | 9.283071256 | 1.02E-13 | GPR158    | -2.873095031 | 4.71E-17 |
| CRLF1         | 8.337542336 | 1.05E-13 | NPAS3     | -7.214867527 | 5.70E-17 |
| ANKRD33B      | 3.577189315 | 1.07E-13 | NDRG4     | -6.076663384 | 6.00E-17 |
| CT83          | 9.346767662 | 1.11E-13 | PHYHIPL   | -10.89254433 | 6.17E-17 |
| SPOCD1        | 6.738843561 | 1.11E-13 | FCGRT     | -6.761377092 | 6.89E-17 |
| FOXF1         | 6.367552262 | 1.21E-13 | IL17D     | -4.924958106 | 7.23E-17 |
| ENPEP         | 7.734195951 | 1.37E-13 | CDH11     | -8.197407409 | 7.76E-17 |
| SLC27A2       | 6.13916901  | 1.78E-13 | ZNF90     | -10.21007468 | 8.19E-17 |

|               |             |          |               |              |          |
|---------------|-------------|----------|---------------|--------------|----------|
| PCAT7         | 7.012366968 | 1.83E-13 | NCALD         | -8.930482188 | 9.75E-17 |
| URI1          | 2.834677087 | 1.93E-13 | FOXG1         | -10.62131767 | 9.94E-17 |
| TBX3          | 8.766174026 | 2.04E-13 | HOXD10        | -6.527447426 | 1.09E-16 |
| PCDHGA11      | 4.423236618 | 2.15E-13 | ZNF788        | -8.068120567 | 1.13E-16 |
| AC009237.8    | 9.329693341 | 2.55E-13 | EDA2R         | -9.853769986 | 1.18E-16 |
| CHMP1B2P      | 9.57475411  | 2.71E-13 | SCARA3        | -9.682658406 | 1.23E-16 |
| CHRNB1        | 3.381862282 | 2.84E-13 | AC018647.3    | -10.62948487 | 1.29E-16 |
| POMP          | 3.077207618 | 2.86E-13 | EHD3          | -10.17479461 | 1.42E-16 |
| ABL2          | 1.946649981 | 3.09E-13 | L3MBTL1       | -8.284658022 | 1.44E-16 |
| GREB1L        | 5.654658124 | 3.32E-13 | AUTS2         | -6.38015083  | 1.64E-16 |
| PI15          | 9.287295526 | 3.53E-13 | NLGN1         | -5.059927971 | 1.80E-16 |
| UAP1          | 3.917844275 | 3.56E-13 | HAGLR         | -10.37607784 | 1.88E-16 |
| TYMP          | 7.789511082 | 4.06E-13 | CLIP3         | -5.945129955 | 1.96E-16 |
| TRDN          | 7.458389294 | 4.29E-13 | CSGALNACT1    | -8.232399915 | 2.10E-16 |
| SYTL3         | 4.49682492  | 4.53E-13 | PALD1         | -10.90680831 | 2.15E-16 |
| EOGT          | 2.54815863  | 4.75E-13 | ATP1B2        | -9.504524542 | 2.62E-16 |
| PAX9          | 5.974857725 | 6.11E-13 | ZNF682        | -10.42077159 | 3.19E-16 |
| RP11-390F4.3  | 4.822466039 | 6.69E-13 | NTRK3         | -9.197252806 | 3.19E-16 |
| LINC01533     | 9.351719175 | 6.69E-13 | EFNB3         | -8.591446455 | 3.21E-16 |
| GABRA3        | 8.575160557 | 6.74E-13 | IL17RB        | -8.654065736 | 3.24E-16 |
| ADAMTSL5      | 4.541447974 | 6.83E-13 | ZNF660        | -10.0699578  | 3.32E-16 |
| STARDB4       | 2.836661212 | 7.11E-13 | RAB33A        | -8.576585853 | 3.40E-16 |
| NEXN          | 3.064731182 | 7.17E-13 | P2RX7         | -9.187600357 | 3.74E-16 |
| CYR61         | 5.2672121   | 7.41E-13 | SOX21-AS1     | -10.67844791 | 4.24E-16 |
| STARDB8       | 4.215153879 | 8.20E-13 | PPFIBP2       | -3.621657396 | 4.66E-16 |
| TINAGL1       | 9.507350859 | 8.94E-13 | PRMT2         | -3.181143107 | 5.87E-16 |
| C9orf84       | 8.657146418 | 9.74E-13 | UGT2B7        | -8.956885073 | 6.58E-16 |
| XDH           | 9.82222514  | 1.07E-12 | ST8SIA5       | -7.849818162 | 7.58E-16 |
| POLD4         | 4.083277395 | 1.07E-12 | ZIC1          | -11.0272921  | 7.94E-16 |
| MICAL2        | 3.586544564 | 1.11E-12 | LEF1          | -7.382403235 | 8.04E-16 |
| LINC00662     | 2.658992173 | 1.17E-12 | ZNF329        | -6.00381647  | 9.07E-16 |
| SP140L        | 2.932572231 | 1.28E-12 | SDHAP3        | -3.905372433 | 9.40E-16 |
| SULT1B1       | 9.066396323 | 1.36E-12 | ZNF880        | -8.091083864 | 1.21E-15 |
| PDLIM1        | 6.279512668 | 1.36E-12 | GRIA4         | -11.20919008 | 1.27E-15 |
| RP11-262H14.3 | 4.33804083  | 1.57E-12 | COLGALT2      | -7.359081654 | 1.30E-15 |
| C2orf61       | 6.773942963 | 1.57E-12 | ZNF829        | -9.859562407 | 1.31E-15 |
| PIK3CD        | 4.158851226 | 1.58E-12 | SNX32         | -7.353942281 | 1.40E-15 |
| TATDN1        | 3.26461441  | 1.65E-12 | COL9A2        | -4.675710053 | 1.53E-15 |
| MELTF         | 3.497884867 | 1.83E-12 | ZNF626        | -10.13870792 | 1.63E-15 |
| MARVELD2      | 6.100614067 | 1.88E-12 | SBDSP1        | -2.872161777 | 1.91E-15 |
| NPAS1         | 4.601118761 | 1.93E-12 | RCBTB2        | -4.409763263 | 2.01E-15 |
| S100A11       | 7.009811445 | 1.93E-12 | DNAL1         | -10.66378167 | 2.06E-15 |
| RP11-221N13.3 | 5.221276331 | 1.97E-12 | CX3CL1        | -9.218951742 | 2.23E-15 |
| SPHK1         | 4.437044625 | 2.09E-12 | ZNF513        | -4.810389562 | 2.35E-15 |
| ARMC4         | 5.531166913 | 2.15E-12 | C2orf72       | -3.585382675 | 2.43E-15 |
| MED30         | 2.878150653 | 2.31E-12 | HERC2P2       | -2.411534305 | 2.53E-15 |
| AP001065.15   | 8.370716353 | 2.71E-12 | TUBA1A        | -3.493380648 | 2.64E-15 |
| CASC8         | 7.391618522 | 2.71E-12 | TIMP4         | -10.35828778 | 2.66E-15 |
| RSPH9         | 6.504984186 | 2.87E-12 | LRRK2         | -3.487581527 | 2.69E-15 |
| RP11-121P12.1 | 9.043223723 | 2.97E-12 | CDIP1         | -4.509824675 | 2.72E-15 |
| NEURL1        | 4.506955651 | 3.17E-12 | RP11-210M15.2 | -7.961094847 | 2.74E-15 |
| KCNH5         | 8.870059735 | 3.35E-12 | PNMA2         | -9.704858902 | 2.96E-15 |
| STK26         | 6.445434363 | 3.42E-12 | MAP3K1        | -4.201957506 | 3.36E-15 |
| RBP7          | 7.112883305 | 3.84E-12 | SPATA18       | -8.537539251 | 3.80E-15 |
| KC6           | 8.731874238 | 4.18E-12 | RRN3P1        | -10.05930384 | 3.80E-15 |
| SP100         | 5.294358713 | 4.33E-12 | MEG3          | -9.884091578 | 3.89E-15 |
| LINC00668     | 8.742740586 | 4.45E-12 | DSEL          | -4.768684615 | 3.96E-15 |
| PERP          | 4.800936489 | 4.47E-12 | AFG3L1P       | -3.001978887 | 4.39E-15 |
| VSTM1         | 8.855953601 | 4.48E-12 | RAPGEF4       | -6.607849543 | 4.48E-15 |
| DAW1          | 9.25006084  | 4.94E-12 | RP11-161M6.2  | -9.861994023 | 4.74E-15 |
| PCBP3         | 5.969916999 | 5.81E-12 | FAM131B       | -8.237770506 | 5.08E-15 |
| SLC27A6       | 8.464113724 | 5.81E-12 | IGFBP5        | -10.19729231 | 5.33E-15 |
| RP11-879F14.2 | 7.167672853 | 5.85E-12 | EN2           | -10.45114509 | 5.51E-15 |
| FMNL1         | 5.775497124 | 6.05E-12 | MANSC1        | -7.903026856 | 5.68E-15 |
| GF11          | 3.369899347 | 6.06E-12 | ZNF585A       | -9.42763627  | 5.98E-15 |
| PABPC1        | 2.380206452 | 6.33E-12 | PDGFD         | -7.056337249 | 6.09E-15 |
| ADRA2C        | 7.735334101 | 6.79E-12 | NCAM1         | -7.326499882 | 6.63E-15 |
| FOXL1         | 8.909237677 | 7.98E-12 | CHST11        | -3.183656018 | 7.04E-15 |

|                |             |          |               |              |          |
|----------------|-------------|----------|---------------|--------------|----------|
| LINC00937      | 8.783839089 | 8.75E-12 | ZNF629        | -2.225279491 | 8.15E-15 |
| SNTG2          | 6.807679703 | 9.17E-12 | LBH           | -10.08479512 | 8.24E-15 |
| LINC01615      | 8.243950135 | 1.01E-11 | PHLPP1        | -3.848510032 | 8.98E-15 |
| DLK2           | 5.946646145 | 1.02E-11 | D2HGDH        | -10.12616631 | 9.56E-15 |
| SNAP91         | 8.220812466 | 1.04E-11 | DACT1         | -9.543800149 | 9.59E-15 |
| FAM129A        | 2.374203625 | 1.05E-11 | GPM6A         | -4.887951774 | 9.76E-15 |
| FAAP24         | 2.666230167 | 1.13E-11 | SLC16A9       | -10.22003955 | 1.05E-14 |
| GPATCH1        | 1.971018955 | 1.16E-11 | GPX7          | -10.41985536 | 1.09E-14 |
| CEBPG          | 2.700543542 | 1.20E-11 | EPHA3         | -7.074658212 | 1.20E-14 |
| IL18R1         | 5.756643411 | 1.32E-11 | ZSCAN16       | -9.661877953 | 1.36E-14 |
| PIWIL4         | 3.814574611 | 1.37E-11 | ZNF502        | -7.840554377 | 1.38E-14 |
| CTD-2162K18.4  | 3.338334789 | 1.38E-11 | AGPAT4        | -2.101653927 | 1.40E-14 |
| AHNAK2         | 2.884554936 | 1.54E-11 | LCTL          | -8.342543906 | 1.62E-14 |
| SLFN13         | 8.597945999 | 1.62E-11 | SUGCT         | -4.222257183 | 1.63E-14 |
| RAB32          | 3.783890141 | 1.68E-11 | UNC5C         | -8.446723159 | 1.67E-14 |
| ACVR1C         | 4.38929114  | 1.70E-11 | PIM2          | -4.257253211 | 1.67E-14 |
| SH3RF2         | 6.545880405 | 1.76E-11 | BMP7          | -9.001588407 | 1.76E-14 |
| C5orf38        | 8.731947638 | 1.94E-11 | RLBP1         | -9.386454877 | 1.78E-14 |
| HYLS1          | 3.339636784 | 1.95E-11 | CADM2         | -5.915072343 | 1.94E-14 |
| ITGBL1         | 6.954455607 | 1.95E-11 | UNC5D         | -9.606742574 | 2.14E-14 |
| LSR            | 4.782358779 | 1.97E-11 | LAYN          | -8.206920928 | 2.15E-14 |
| CYP1B1         | 3.102717418 | 2.12E-11 | ZNF528-AS1    | -10.33612284 | 2.16E-14 |
| SYPL2          | 3.680256023 | 2.31E-11 | HTRA1         | -3.634436826 | 2.25E-14 |
| MOXD1          | 6.016829671 | 2.41E-11 | PROX1         | -9.558855829 | 2.47E-14 |
| PAX2           | 8.646906415 | 2.45E-11 | COL9A1        | -10.68593224 | 2.62E-14 |
| TAP2           | 2.389164376 | 2.48E-11 | CTNNA3        | -9.274033093 | 2.75E-14 |
| RAD21L1        | 6.88404503  | 2.52E-11 | SLC16A4       | -5.396769728 | 2.81E-14 |
| TBX1           | 6.295838857 | 2.57E-11 | ID2           | -3.718737131 | 2.82E-14 |
| CTD-2054N24.2  | 8.481067491 | 2.59E-11 | RAMP1         | -7.671859269 | 2.95E-14 |
| STOM           | 3.04993815  | 2.64E-11 | ZNF501        | -9.124117562 | 3.11E-14 |
| SCFD1          | 1.869988954 | 3.05E-11 | GRID1         | -9.147065955 | 3.15E-14 |
| HSD17B7        | 2.263053874 | 3.22E-11 | RP11-275H4.1  | -9.076431963 | 3.29E-14 |
| RIMS2          | 5.801715661 | 3.30E-11 | NYNRIN        | -9.748043583 | 3.77E-14 |
| RP11-1149O23.3 | 8.06830903  | 3.64E-11 | QKI           | -2.873719689 | 4.43E-14 |
| LINC00704      | 8.789363096 | 4.84E-11 | CHT3          | -2.172466205 | 4.46E-14 |
| TREM1          | 8.84915168  | 4.89E-11 | ARHGAP20      | -6.330070706 | 4.68E-14 |
| TMEM56         | 4.632607028 | 4.89E-11 | RHBDL3        | -9.394730482 | 4.78E-14 |
| LAMA3          | 4.531572023 | 5.51E-11 | ZKSCAN7       | -9.551872719 | 4.80E-14 |
| JAKMIP1        | 8.486903626 | 5.74E-11 | BACE1         | -2.538914293 | 4.81E-14 |
| NCEH1          | 2.635097116 | 5.80E-11 | SARM1         | -4.854439691 | 5.29E-14 |
| STARD10        | 3.220951235 | 6.92E-11 | ENG           | -9.407434652 | 6.08E-14 |
| B3GNTL1        | 2.81932632  | 7.08E-11 | GAREM2        | -9.527203178 | 6.11E-14 |
| STEAP1         | 6.699685619 | 7.55E-11 | VSTM2B        | -4.142350575 | 7.38E-14 |
| ANKRD20A7P     | 5.747945417 | 7.68E-11 | TANC1         | -2.836249914 | 7.73E-14 |
| ASNS           | 2.0213876   | 7.88E-11 | PCDH7         | -5.016483528 | 7.83E-14 |
| RUNDC3B        | 5.662783935 | 8.15E-11 | POM121        | -2.615466504 | 8.67E-14 |
| KCTD15         | 1.991483107 | 8.64E-11 | TRIO          | -2.359186565 | 1.01E-13 |
| FENRRR         | 8.871195576 | 8.73E-11 | ADCY1         | -9.958402246 | 1.06E-13 |
| MCL1           | 2.043310787 | 8.90E-11 | TMEM255A      | -10.15856111 | 1.11E-13 |
| SLC44A3        | 4.801732463 | 1.03E-10 | CRISPLD1      | -2.36138726  | 1.16E-13 |
| DLX4           | 5.605708081 | 1.04E-10 | TMEM169       | -3.73587433  | 1.21E-13 |
| TRPM2          | 8.127330888 | 1.12E-10 | LRP6          | -2.387109171 | 1.27E-13 |
| PLAGL1         | 6.907773222 | 1.13E-10 | LRRTM3        | -10.16304446 | 1.37E-13 |
| PRDM6          | 5.357796962 | 1.15E-10 | CHL1          | -8.664921802 | 1.42E-13 |
| IL22RA1        | 6.270520045 | 1.25E-10 | TRIM71        | -9.558260951 | 1.45E-13 |
| ADAMTS16       | 7.971275535 | 1.27E-10 | SPSB4         | -9.108004162 | 1.52E-13 |
| DYNC2H1        | 2.176882976 | 1.49E-10 | DGKG          | -5.995938399 | 1.70E-13 |
| HTR4           | 8.278498155 | 1.62E-10 | FCGR2A        | -7.848040645 | 1.81E-13 |
| CDC42EP1       | 3.893832613 | 1.63E-10 | RP11-508N22.2 | -4.021098732 | 1.89E-13 |
| LINC02163      | 8.256808714 | 1.70E-10 | ZNF793        | -7.107591698 | 1.97E-13 |
| RP11-66B24.4   | 8.411213248 | 1.78E-10 | SLC38A3       | -9.315850306 | 2.16E-13 |
| SQRDL          | 3.78406253  | 1.95E-10 | XYLT1         | -6.404403193 | 2.29E-13 |
| PARM1          | 5.76649706  | 1.96E-10 | REEP2         | -9.587509125 | 2.44E-13 |
| PAWR           | 5.694403024 | 2.04E-10 | ZNF350        | -9.344411185 | 2.51E-13 |
| PITPNM1        | 3.342526777 | 2.11E-10 | KCNH2         | -9.049089005 | 2.81E-13 |
| PPIC           | 2.63486009  | 2.12E-10 | SESN3         | -4.662226537 | 2.89E-13 |
| CEP55          | 1.781176612 | 2.28E-10 | EN1           | -9.470049184 | 2.89E-13 |
| C1QTNF12       | 8.566225282 | 2.40E-10 | SHC4          | -4.204050352 | 3.06E-13 |

|               |             |          |              |              |          |
|---------------|-------------|----------|--------------|--------------|----------|
| MET           | 4.964316953 | 2.68E-10 | LOX          | -9.595329966 | 3.09E-13 |
| HLX           | 8.32616275  | 2.94E-10 | STAC2        | -9.498233452 | 3.17E-13 |
| KLC2          | 2.363450549 | 2.99E-10 | FGL2         | -9.087055866 | 3.27E-13 |
| NOX3          | 8.950231655 | 3.13E-10 | DTNA         | -7.133382993 | 3.43E-13 |
| HPSE          | 3.841066439 | 3.35E-10 | ZNF568       | -4.321616907 | 3.53E-13 |
| CTC-308K20.1  | 4.217809789 | 3.39E-10 | RASL10B      | -8.773796533 | 3.54E-13 |
| MSMO1         | 2.104822324 | 3.44E-10 | MLC1         | -9.919336826 | 3.84E-13 |
| TCIRG1        | 5.547952219 | 3.44E-10 | SRSF12       | -8.947413633 | 4.03E-13 |
| RP11-268G12.1 | 4.871952911 | 3.91E-10 | DCHS1        | -7.789766224 | 4.62E-13 |
| CD109         | 5.115971602 | 3.98E-10 | SPATA6       | -4.438571329 | 4.74E-13 |
| CSAG2         | 8.209689102 | 4.01E-10 | BEND5        | -8.950317877 | 5.12E-13 |
| SAMD3         | 8.241270508 | 4.11E-10 | LRRC37A2     | -5.296736398 | 5.33E-13 |
| NAGS          | 4.321507059 | 4.13E-10 | NKX2-2       | -9.630164842 | 5.42E-13 |
| PKP3          | 5.624990457 | 4.20E-10 | SOBP         | -3.061564279 | 5.54E-13 |
| LPIN3         | 5.542145588 | 4.30E-10 | LINC01896    | -8.717255997 | 5.77E-13 |
| GADD45B       | 3.506902648 | 4.44E-10 | CD302        | -9.487738425 | 5.83E-13 |
| NUDT19        | 2.322905383 | 4.50E-10 | HILS1        | -9.081856382 | 5.86E-13 |
| CDK15         | 8.483118047 | 4.56E-10 | SEPT7        | -2.503100507 | 6.00E-13 |
| SPTB          | 4.068049916 | 4.77E-10 | ITGB8        | -4.02595054  | 6.13E-13 |
| MAFK          | 3.048115348 | 4.79E-10 | CLN5         | -2.411325908 | 6.77E-13 |
| RP4-756H11.3  | 3.053415812 | 4.84E-10 | SPARCL1      | -9.751046978 | 6.93E-13 |
| ICAM1         | 4.553629258 | 4.92E-10 | AMPH         | -8.840481822 | 7.46E-13 |
| TMEM65        | 2.609586651 | 5.00E-10 | TMEM200C     | -8.883351685 | 8.01E-13 |
| P4HA3         | 6.022250026 | 5.15E-10 | HAND2        | -9.26807746  | 8.19E-13 |
| DUSP1         | 3.286689697 | 5.55E-10 | YWHAG        | -2.719357957 | 8.83E-13 |
| FCHSD1        | 2.542522501 | 5.64E-10 | CACNG4       | -9.330201339 | 9.32E-13 |
| INHBE         | 5.439184056 | 5.77E-10 | CA14         | -9.090733215 | 1.00E-12 |
| DMTN          | 4.237842151 | 5.83E-10 | CSMD2        | -8.919807686 | 1.01E-12 |
| NUDT2         | 2.454110123 | 6.04E-10 | ZNF613       | -7.44015856  | 1.05E-12 |
| KCNJ11        | 5.858381609 | 6.04E-10 | CAND2        | -8.970632865 | 1.07E-12 |
| STXBP5-AS1    | 4.832831339 | 6.31E-10 | PPARGC1A     | -8.12470585  | 1.11E-12 |
| PCDHGB4       | 5.331412664 | 6.42E-10 | DAAM2        | -9.243406812 | 1.12E-12 |
| MAGEA2B       | 8.073498741 | 6.56E-10 | NKAIN1       | -6.859791618 | 1.16E-12 |
| SLCO1A2       | 7.854010996 | 6.88E-10 | CASC15       | -9.336123802 | 1.20E-12 |
| SLC9A2        | 5.285059646 | 7.06E-10 | PLPPR5       | -8.882810232 | 1.21E-12 |
| LRP11         | 2.168077483 | 7.06E-10 | COL22A1      | -8.535900913 | 1.22E-12 |
| STEAP3        | 2.615728039 | 7.06E-10 | FAM168B      | -1.779746693 | 1.22E-12 |
| RP11-423H2.1  | 1.799410715 | 7.08E-10 | RP3-525N10.2 | -6.660068513 | 1.23E-12 |
| INO80C        | 2.350599073 | 7.35E-10 | SHC3         | -2.691407268 | 1.44E-12 |
| PTTG1         | 2.509301668 | 7.36E-10 | ZNF708       | -2.62627655  | 1.52E-12 |
| ATF7IP2       | 7.706519694 | 8.31E-10 | ZNF730       | -8.739699902 | 1.60E-12 |
| DGAT2         | 3.211915537 | 8.32E-10 | BAZ1B        | -2.762258786 | 1.62E-12 |
| BNC2          | 6.47115463  | 8.34E-10 | ZNF597       | -9.041500888 | 1.89E-12 |
| DRAP1         | 2.595262103 | 8.69E-10 | PTPRD        | -6.138160757 | 1.92E-12 |
| SLC39A4       | 7.931494444 | 9.21E-10 | ATP1A2       | -8.800575235 | 2.08E-12 |
| MICA          | 4.090575775 | 9.23E-10 | ENC1         | -2.964578613 | 2.18E-12 |
| SHC1          | 3.049894071 | 9.26E-10 | NOMO1        | -2.07002862  | 2.28E-12 |
| EFCAB10       | 6.816508256 | 9.46E-10 | GRASP        | -8.820935872 | 2.28E-12 |
| ACSM3         | 3.829226204 | 9.62E-10 | SPOCK1       | -9.259056785 | 2.33E-12 |
| IL1R1         | 5.977225851 | 1.01E-09 | PLXNB1       | -3.31053848  | 2.56E-12 |
| KDELR3        | 3.078509215 | 1.03E-09 | TGFBR1       | -1.937063821 | 2.67E-12 |
| RNF135        | 2.03717114  | 1.07E-09 | DYNLL2       | -2.049706022 | 2.84E-12 |
| BLZF1         | 2.286235671 | 1.16E-09 | MREG         | -3.147754199 | 2.96E-12 |
| RP11-962G15.1 | 5.492674363 | 1.17E-09 | EVL          | -2.592056101 | 3.09E-12 |
| KSR2          | 7.934479716 | 1.23E-09 | WISP1        | -10.04000776 | 3.34E-12 |
| RP11-191L9.4  | 7.544550047 | 1.24E-09 | LURAP1       | -8.932546904 | 3.59E-12 |
| NDUFB9        | 2.297508066 | 1.32E-09 | BEX4         | -10.68838961 | 3.83E-12 |
| FOXA1         | 8.296014433 | 1.32E-09 | FN1          | -4.475818544 | 3.95E-12 |
| ADAP2         | 3.360071655 | 1.37E-09 | ING5         | -2.56375819  | 4.09E-12 |
| STOX1         | 2.308681879 | 1.42E-09 | ZNF610       | -5.579433024 | 4.45E-12 |
| TUBA1C        | 3.494690159 | 1.46E-09 | MOCS1        | -9.461182549 | 4.60E-12 |
| GCNT2         | 2.558151097 | 1.52E-09 | PCDH9        | -4.972407095 | 4.66E-12 |
| MYO1D         | 6.093075883 | 1.52E-09 | NF2          | -1.93103303  | 4.81E-12 |
| PAPLN         | 5.08331233  | 1.60E-09 | SLC22A23     | -2.670555266 | 5.01E-12 |
| KCNG3         | 5.224748569 | 1.73E-09 | ING3         | -1.920348482 | 5.24E-12 |
| CALB2         | 8.803131501 | 1.76E-09 | ACSBG1       | -8.637936478 | 5.29E-12 |
| GPR176        | 2.096464143 | 1.79E-09 | DNAH11       | -6.336125387 | 5.60E-12 |
| FSTL3         | 2.678035027 | 1.90E-09 | SLC8A3       | -8.98646579  | 6.19E-12 |

|               |             |          |               |              |          |
|---------------|-------------|----------|---------------|--------------|----------|
| HJURP         | 1.609170662 | 1.92E-09 | PDPN          | -9.474467004 | 6.32E-12 |
| RSPH3         | 1.979736713 | 1.93E-09 | TGFA          | -6.037124927 | 7.26E-12 |
| TMEM74        | 6.599369178 | 2.05E-09 | MIDN          | -2.23557856  | 7.29E-12 |
| CCDC69        | 4.491225879 | 2.15E-09 | TENM1         | -7.601857637 | 7.83E-12 |
| SLC5A12       | 3.495395949 | 2.16E-09 | PDZRN3        | -9.905967086 | 8.74E-12 |
| ERVMER34-1    | 6.97777023  | 2.21E-09 | VGLL4         | -2.113415267 | 9.17E-12 |
| SUN3          | 8.842694345 | 2.25E-09 | POM121C       | -2.53890947  | 9.25E-12 |
| GATA6         | 7.960430528 | 2.45E-09 | SIPA1L2       | -3.833376088 | 9.27E-12 |
| RP11-419H17.1 | 5.188552613 | 2.55E-09 | PLEKHA7       | -5.426444875 | 9.33E-12 |
| GLT8D2        | 3.528624475 | 2.68E-09 | RP11-629G13.1 | -8.379396214 | 1.00E-11 |
| CD274         | 3.414469829 | 2.86E-09 | ZNF253        | -3.346594707 | 1.03E-11 |
| FADS3         | 2.588280271 | 2.88E-09 | RP11-403A3.3  | -9.883416675 | 1.05E-11 |
| MNX1-AS1      | 4.331028456 | 2.88E-09 | PIANP         | -10.25838693 | 1.06E-11 |
| OSCAR         | 6.070837964 | 2.92E-09 | MIR99AHG      | -3.934916524 | 1.08E-11 |
| AC116614.1    | 5.717797695 | 3.06E-09 | DCLK1         | -9.305260473 | 1.08E-11 |
| IQCG          | 2.723182171 | 3.06E-09 | ZNF132        | -9.138988243 | 1.09E-11 |
| COL6A4P1      | 7.77648113  | 3.07E-09 | TAS2R14       | -3.171611974 | 1.10E-11 |
| ARHGEF28      | 4.940166241 | 3.11E-09 | NRDE2         | -1.863926192 | 1.11E-11 |
| ITGB2         | 8.433974296 | 3.31E-09 | CECR2         | -2.933356988 | 1.12E-11 |
| LPIN1         | 2.365586945 | 3.53E-09 | MAMLD1        | -2.539879194 | 1.13E-11 |
| HRK           | 3.464099169 | 3.89E-09 | ZMIZ1         | -2.719191971 | 1.15E-11 |
| TSPEAR-AS2    | 7.861341045 | 4.06E-09 | EXOC4         | -1.869811181 | 1.23E-11 |
| GATA2-AS1     | 7.511897668 | 4.17E-09 | APCDD1        | -9.562531603 | 1.23E-11 |
| MSX2          | 7.854637092 | 4.22E-09 | CASD1         | -2.900277409 | 1.28E-11 |
| TRABD2A       | 4.547917093 | 4.49E-09 | NOTCH3        | -8.153628127 | 1.28E-11 |
| LINC01106     | 7.775865143 | 4.51E-09 | ARHGAP42      | -4.016082445 | 1.28E-11 |
| ARHGAP40      | 6.48402718  | 4.53E-09 | FCGR2C        | -8.443591396 | 1.38E-11 |
| PPP1R13L      | 4.301383932 | 4.60E-09 | MARC1         | -4.341247758 | 1.41E-11 |
| N4BP3         | 4.528783286 | 4.64E-09 | FADS2         | -3.083241594 | 1.47E-11 |
| LINC00941     | 4.901685682 | 5.11E-09 | AC108142.1    | -8.919909338 | 1.48E-11 |
| SLC29A1       | 1.920056266 | 5.26E-09 | CDKN1B        | -2.410553199 | 1.50E-11 |
| PTGER4        | 7.785381826 | 5.29E-09 | FAM120C       | -3.415820507 | 1.51E-11 |
| MNX1          | 3.125025732 | 5.42E-09 | WWC3          | -2.606629707 | 1.60E-11 |
| SMS           | 2.102905405 | 5.53E-09 | ST5           | -3.325106723 | 1.61E-11 |
| TSPEAR-AS1    | 7.720834221 | 5.64E-09 | RGR           | -8.660629444 | 1.72E-11 |
| RP11-359K18.4 | 3.529648568 | 5.78E-09 | LHFPL3        | -8.914018515 | 1.74E-11 |
| AURKB         | 2.363529693 | 5.90E-09 | AC005154.6    | -2.818045991 | 1.77E-11 |
| OTX1          | 3.284793985 | 6.08E-09 | SCUBE2        | -5.496805625 | 1.86E-11 |
| AC141928.1    | 6.975413428 | 6.36E-09 | LMO7          | -3.435356769 | 1.95E-11 |
| HOXB6         | 7.306240165 | 6.46E-09 | SORBS2        | -7.416761466 | 2.11E-11 |
| EFHD2         | 3.113296975 | 6.64E-09 | CECR6         | -4.563177647 | 2.13E-11 |
| RP1-102E24.8  | 7.947629154 | 6.95E-09 | ANKRD10       | -2.292872501 | 2.15E-11 |
| ADAMTSL4      | 4.74600961  | 7.04E-09 | LUC7L2        | -1.977428472 | 2.21E-11 |
| CXCL3         | 7.715941373 | 7.11E-09 | ZNF3          | -1.958961924 | 2.23E-11 |
| TTC39B        | 3.361909153 | 7.13E-09 | ZNF10         | -2.637146165 | 2.31E-11 |
| RP11-408B11.2 | 7.274106998 | 7.61E-09 | PGAP1         | -3.788491919 | 2.33E-11 |
| YIF1A         | 2.578775453 | 7.78E-09 | ABCA1         | -7.763159382 | 2.49E-11 |
| NBPF8         | 2.38466     | 8.48E-09 | PAX6          | -9.115436937 | 2.65E-11 |
| LBX2-AS1      | 4.21313293  | 8.53E-09 | VASH1         | -2.201840561 | 2.69E-11 |
| DNAAF3        | 5.303352744 | 8.56E-09 | DCC           | -9.774836514 | 2.74E-11 |
| RP4-639F20.1  | 2.662459679 | 8.82E-09 | WLS           | -3.153694785 | 2.75E-11 |
| TMEM171       | 5.96635433  | 8.97E-09 | SLC40A1       | -9.266258679 | 2.91E-11 |
| PARD3         | 1.788626557 | 9.72E-09 | PKNOX2        | -4.070588837 | 2.92E-11 |
| CLCF1         | 3.814585842 | 1.05E-08 | KIF5A         | -8.617260508 | 2.92E-11 |
| EML2-AS1      | 4.336272386 | 1.09E-08 | RIMS4         | -9.34069477  | 3.16E-11 |
| RP11-63G10.4  | 7.212949803 | 1.11E-08 | LINC01268     | -8.650840613 | 3.20E-11 |
| AJAP1         | 8.711525395 | 1.18E-08 | TIMP3         | -7.153875308 | 3.21E-11 |
| RP11-809O17.1 | 4.287316525 | 1.19E-08 | TMEM176B      | -8.555184998 | 3.44E-11 |
| EFHC1         | 2.799524328 | 1.29E-08 | LINC00888     | -2.387346492 | 3.44E-11 |
| RHBDF2        | 4.081740817 | 1.30E-08 | RP11-436K8.1  | -9.1534206   | 3.66E-11 |
| BAG2          | 3.89029467  | 1.30E-08 | NDRG2         | -6.381420359 | 4.04E-11 |
| PLEKHF1       | 3.814623752 | 1.30E-08 | SUSD6         | -2.126698254 | 4.08E-11 |
| PAQR7         | 2.272751283 | 1.33E-08 | ZNF572        | -8.619138989 | 4.10E-11 |
| PDGFB         | 8.448542423 | 1.33E-08 | CAMK1         | -9.994859989 | 4.23E-11 |
| DNAH5         | 4.547241587 | 1.38E-08 | ZNF713        | -4.053929672 | 4.51E-11 |
| RP11-328K4.1  | 7.624906303 | 1.43E-08 | CRB1          | -5.505328506 | 4.53E-11 |
| PATJ          | 2.919373071 | 1.43E-08 | PRKAR1B       | -3.259574342 | 4.53E-11 |
| XAGE1B        | 7.222530678 | 1.47E-08 | FAM212B       | -5.595424626 | 4.87E-11 |



|                |             |          |               |              |          |
|----------------|-------------|----------|---------------|--------------|----------|
| SQLE           | 2.524282569 | 1.51E-08 | CDH19         | -9.505711618 | 5.31E-11 |
| NNMT           | 6.432835991 | 1.57E-08 | TRIM60P18     | -8.481672752 | 5.59E-11 |
| CPNE7          | 4.899991934 | 1.61E-08 | PLEKHB1       | -3.027593713 | 5.60E-11 |
| TIPRL          | 1.877169407 | 1.63E-08 | FAXC          | -9.168673541 | 5.80E-11 |
| NUP62CL        | 4.744812088 | 1.73E-08 | TAGLN3        | -4.519613998 | 6.20E-11 |
| PFDN2          | 2.058843105 | 1.80E-08 | DMRT2         | -9.000753292 | 6.27E-11 |
| GATA5          | 7.949669946 | 1.85E-08 | CYP4F29P      | -5.689165553 | 6.45E-11 |
| EML6           | 3.425680033 | 1.85E-08 | FAT3          | -9.339960752 | 6.50E-11 |
| PCDHB3         | 3.758112054 | 1.86E-08 | CADM4         | -3.963953463 | 6.66E-11 |
| TMEM144        | 4.359403781 | 1.94E-08 | CDH7          | -9.825580941 | 6.92E-11 |
| LSM11          | 1.6528952   | 1.98E-08 | ZNF704        | -3.535780593 | 7.48E-11 |
| AGAP7P         | 4.35551378  | 2.05E-08 | ASTN1         | -8.68251012  | 7.52E-11 |
| AREG           | 7.61528496  | 2.07E-08 | GTF2IP4       | -3.201276445 | 7.59E-11 |
| NEUROG2        | 7.524682836 | 2.10E-08 | CTD-2561J22.2 | -8.181471606 | 7.99E-11 |
| ROR2           | 6.574301034 | 2.26E-08 | ADGRB3        | -4.848981131 | 8.56E-11 |
| TCOF1          | 2.715985488 | 2.38E-08 | CRYAB         | -9.02962067  | 9.05E-11 |
| VWA5B2         | 7.190222738 | 2.57E-08 | ZNF561-AS1    | -2.939397831 | 9.05E-11 |
| GKAP1          | 2.219373884 | 2.61E-08 | GTF2IP1       | -3.267517506 | 9.27E-11 |
| SNHG8          | 3.401142657 | 2.65E-08 | VPS41         | -2.261133259 | 9.57E-11 |
| IL15RA         | 4.472840219 | 2.73E-08 | EPC2          | -2.282359641 | 1.01E-10 |
| AMN1           | 1.879947855 | 2.78E-08 | GRB10         | -3.972812942 | 1.02E-10 |
| KISS1          | 7.941750254 | 2.87E-08 | TMPRSS5       | -4.684669572 | 1.08E-10 |
| PEX6           | 1.916659702 | 3.16E-08 | HOXD9         | -6.410263676 | 1.10E-10 |
| FXYD5          | 6.520124096 | 3.17E-08 | ISPD          | -8.344366595 | 1.14E-10 |
| RP11-497G19.2  | 7.584318915 | 3.32E-08 | TIGAR         | -2.393431335 | 1.16E-10 |
| RHOV           | 3.636398347 | 3.79E-08 | KIF1A         | -7.638648178 | 1.19E-10 |
| HPCAL1         | 3.3483159   | 3.99E-08 | ARSE          | -8.719077726 | 1.37E-10 |
| RP11-295G20.2  | 2.273079322 | 4.32E-08 | TNC           | -7.489376663 | 1.49E-10 |
| GPRC5C         | 6.533455558 | 4.39E-08 | RP5-882C2.2   | -3.146614921 | 1.50E-10 |
| RHOF           | 4.348262877 | 4.42E-08 | ATMIN         | -1.874946624 | 1.52E-10 |
| MTBP           | 1.769542495 | 4.57E-08 | DPY19L2P2     | -4.952084237 | 1.52E-10 |
| RSPO4          | 6.466341757 | 4.69E-08 | NPL           | -9.070858855 | 1.56E-10 |
| IL15           | 4.619122369 | 4.74E-08 | KCND2         | -8.877509591 | 1.58E-10 |
| SZT2-AS1       | 7.536631183 | 4.74E-08 | MIAT          | -7.634121988 | 1.63E-10 |
| IFNLR1         | 7.070643901 | 4.75E-08 | C14orf37      | -3.948436124 | 1.84E-10 |
| CYP26B1        | 4.713464233 | 4.90E-08 | PELI2         | -6.949413329 | 1.84E-10 |
| LGALS2         | 7.361977356 | 5.03E-08 | HIST1H2BN     | -3.779246657 | 1.96E-10 |
| CDH23          | 6.127350939 | 5.32E-08 | FAM196A       | -9.293231276 | 2.04E-10 |
| SPEF2          | 3.786749972 | 5.41E-08 | ST3GAL6       | -2.436643253 | 2.20E-10 |
| SLC46A3        | 4.129271264 | 5.57E-08 | LINC00641     | -2.919069966 | 2.50E-10 |
| STAT6          | 3.171037153 | 6.07E-08 | PDLIM4        | -8.372382622 | 2.63E-10 |
| GLRX           | 3.569756984 | 6.16E-08 | ZNF844        | -6.085858807 | 2.68E-10 |
| SMAGP          | 4.50820343  | 6.23E-08 | FOXN3         | -2.317824893 | 2.92E-10 |
| MATK           | 7.406494039 | 6.30E-08 | ZNF66         | -8.179382212 | 2.92E-10 |
| TBC1D8B        | 2.272984517 | 6.35E-08 | ELAVL3        | -9.381212236 | 3.04E-10 |
| NDUFV1         | 2.133710812 | 6.47E-08 | EPHB3         | -5.128718708 | 3.16E-10 |
| OPLAH          | 5.898682853 | 6.56E-08 | XKR5          | -8.089127271 | 3.27E-10 |
| ZFAND1         | 2.270683786 | 6.65E-08 | BEX1          | -8.951649524 | 3.33E-10 |
| MID2           | 3.741921803 | 6.95E-08 | TPT1-AS1      | -2.889017128 | 3.55E-10 |
| EIF3E          | 2.189769702 | 6.97E-08 | POLR2D        | -1.884638485 | 3.73E-10 |
| CTD-2207P18.2  | 7.554943496 | 6.98E-08 | AC114730.3    | -8.540168498 | 3.82E-10 |
| UPK1A-AS1      | 7.064243249 | 6.99E-08 | ZNF630        | -8.26587763  | 3.83E-10 |
| CTD-2587H24.5  | 7.513565712 | 7.00E-08 | ZBTB8B        | -8.177094174 | 3.96E-10 |
| ITPR3          | 3.859249955 | 7.40E-08 | DSC2          | -8.144468934 | 3.99E-10 |
| MYH15          | 3.529512421 | 7.61E-08 | RP11-444D3.1  | -8.218665966 | 4.12E-10 |
| ATP8B3         | 4.105206884 | 7.62E-08 | PHLDB1        | -2.851358214 | 4.28E-10 |
| TPRG1          | 4.362960397 | 7.82E-08 | PLEKHA4       | -3.202731542 | 4.50E-10 |
| FAM86JP        | 2.88795307  | 7.83E-08 | MOB3B         | -3.794909886 | 4.68E-10 |
| FLNC           | 5.17668967  | 7.89E-08 | TTLL6         | -8.027738674 | 4.77E-10 |
| CTD-2066L21.3  | 6.285733224 | 7.90E-08 | NES           | -6.06911089  | 4.89E-10 |
| SEMA3F         | 3.825659501 | 8.02E-08 | ATP9B         | -2.419285766 | 5.32E-10 |
| NBPF26         | 2.644124877 | 8.36E-08 | CBX3          | -1.863023118 | 5.44E-10 |
| RP11-1038A11.1 | 7.25275581  | 8.52E-08 | RGS7BP        | -8.748284792 | 5.58E-10 |
| PLEKHG4        | 5.867395301 | 8.60E-08 | ST8SIA1       | -8.861677802 | 5.73E-10 |
| INSIG1         | 1.385068067 | 9.07E-08 | CXXC4         | -4.496589375 | 6.10E-10 |
| RAD21          | 1.785180942 | 9.28E-08 | CTC-559E9.5   | -8.344951059 | 6.27E-10 |
| LINC00623      | 3.533898273 | 9.56E-08 | RNF180        | -8.866709877 | 6.69E-10 |
| RP11-89C3.4    | 7.943650619 | 1.01E-07 | PCDHB5        | -8.079950987 | 6.87E-10 |

|               |             |          |                |              |          |
|---------------|-------------|----------|----------------|--------------|----------|
| MSR1          | 7.541335162 | 1.01E-07 | COTL1          | -3.055208784 | 6.94E-10 |
| UHMK1         | 1.692010055 | 1.08E-07 | NT5C3A         | -3.028047386 | 7.01E-10 |
| BLVRB         | 2.876808058 | 1.18E-07 | ADAMTS9        | -7.090363115 | 7.01E-10 |
| CYB561        | 3.092550208 | 1.23E-07 | ZMAT3          | -2.642406905 | 7.10E-10 |
| DNM1P46       | 6.052414083 | 1.31E-07 | RNF150         | -3.959658885 | 7.11E-10 |
| CENPW         | 2.491538787 | 1.42E-07 | XKR6           | -8.041604331 | 7.17E-10 |
| LY6E          | 2.951091292 | 1.46E-07 | DYRK1B         | -3.235545655 | 7.21E-10 |
| TMEM134       | 2.341927806 | 1.48E-07 | FAM198A        | -8.460612073 | 7.23E-10 |
| LINC00689     | 7.919931953 | 1.49E-07 | NRCAM          | -6.213205884 | 7.44E-10 |
| LINC01162     | 7.206055523 | 1.50E-07 | RABIF          | -1.955012276 | 8.39E-10 |
| CCND1         | 1.809733394 | 1.51E-07 | GSTM2          | -3.604770705 | 8.43E-10 |
| RIN1          | 4.552124496 | 1.54E-07 | C1orf216       | -2.517013065 | 9.32E-10 |
| RGS10         | 2.795463949 | 1.57E-07 | RTKN           | -2.49647924  | 9.56E-10 |
| LINC00702     | 6.819882379 | 1.58E-07 | RP11-398K22.12 | -2.943377545 | 9.86E-10 |
| CTD-2311M21.3 | 7.220608546 | 1.59E-07 | RP9            | -2.602651596 | 9.96E-10 |
| SMTN          | 2.681079236 | 1.62E-07 | MSI2           | -2.047638975 | 1.02E-09 |
| P4HA2         | 2.693749571 | 1.76E-07 | RP11-159D12.2  | -2.798991565 | 1.02E-09 |
| AC060834.3    | 7.227385695 | 1.77E-07 | C8orf88        | -4.039531664 | 1.03E-09 |
| RNF6          | 1.582813696 | 1.81E-07 | RP1-40E16.9    | -8.392876913 | 1.07E-09 |
| RNF212        | 6.803707261 | 1.85E-07 | SLC44A5        | -8.087998331 | 1.24E-09 |
| CTD-2303H24.2 | 4.704207831 | 1.86E-07 | TMEM198        | -4.741158452 | 1.24E-09 |
| RP11-15A1.2   | 6.787720725 | 1.88E-07 | DCHS2          | -9.574562666 | 1.25E-09 |
| AADAC         | 7.315291823 | 1.89E-07 | BBS9           | -2.466197549 | 1.32E-09 |
| BOK           | 2.559645467 | 1.94E-07 | KIAA1456       | -8.305725189 | 1.36E-09 |
| SMCO4         | 4.126781577 | 1.96E-07 | FREM1          | -6.784375309 | 1.45E-09 |
| PRDX6         | 1.645290329 | 2.00E-07 | CTC-260E6.6    | -8.030632831 | 1.49E-09 |
| EOMES         | 7.192390853 | 2.01E-07 | HIP1           | -3.591111157 | 1.55E-09 |
| PCED1B        | 4.281590813 | 2.03E-07 | MURC           | -2.442062179 | 1.70E-09 |
| ATP2A3        | 4.039885023 | 2.04E-07 | SLC26A4        | -3.015547134 | 1.72E-09 |
| RP5-965G21.4  | 4.610304614 | 2.04E-07 | ZNF827         | -2.468447492 | 1.75E-09 |
| RNF169        | 2.001124756 | 2.06E-07 | SOGA1          | -1.855397591 | 1.77E-09 |
| CDKN3         | 1.688374591 | 2.12E-07 | GATS           | -3.246205848 | 1.80E-09 |
| CXCL2         | 6.887738653 | 2.13E-07 | GULP1          | -2.526194695 | 1.91E-09 |
| FBXO6         | 3.1018191   | 2.16E-07 | GPC6           | -2.803358148 | 1.92E-09 |
| EGFR-AS1      | 7.467470445 | 2.19E-07 | ANKRD44        | -3.196667075 | 1.94E-09 |
| RALBP1        | 1.778190423 | 2.26E-07 | EPHX2          | -8.04684561  | 1.96E-09 |
| SEC23A        | 1.558129817 | 2.26E-07 | ELN            | -8.936451314 | 1.98E-09 |
| CXCL1         | 6.977692859 | 2.35E-07 | ZNF680         | -2.663909908 | 1.98E-09 |
| ZNF233        | 3.070973205 | 2.42E-07 | GPC2           | -4.058467056 | 2.00E-09 |
| GLDN          | 4.760803465 | 2.45E-07 | FRAS1          | -8.252173315 | 2.05E-09 |
| C3orf67       | 6.177947413 | 2.46E-07 | MEOX2          | -8.673562863 | 2.11E-09 |
| FAM26E        | 5.676871117 | 2.53E-07 | CHI3L2         | -5.647455583 | 2.12E-09 |
| FASN          | 3.050996704 | 2.54E-07 | GPR37L1        | -8.395592638 | 2.16E-09 |
| ZDHHC11B      | 2.826765098 | 2.57E-07 | ZNF454         | -6.438354007 | 2.17E-09 |
| CYSTM1        | 2.171272826 | 2.61E-07 | SLC18A1        | -8.004944337 | 2.19E-09 |
| CLMP          | 3.030158787 | 2.85E-07 | AC092835.2     | -5.100191558 | 2.35E-09 |
| KCTD13        | 2.033754176 | 2.95E-07 | HSBP1          | -1.822454641 | 2.36E-09 |
| SLFN5         | 4.700280359 | 3.08E-07 | RFX4           | -7.937190342 | 2.49E-09 |
| NKX2-5        | 7.317834473 | 3.14E-07 | GPCPD1         | -2.600260486 | 2.66E-09 |
| FAM169A       | 2.008542279 | 3.20E-07 | KIAA1211L      | -8.264788865 | 2.68E-09 |
| BARX2         | 7.522678667 | 3.27E-07 | MARCKSL1       | -2.669447732 | 2.69E-09 |
| CGB7          | 7.223634926 | 3.32E-07 | MIR3681HG      | -8.879008143 | 2.81E-09 |
| CEP72         | 1.882470845 | 3.36E-07 | BCL2L11        | -2.97836296  | 2.82E-09 |
| FAAHP1        | 5.416285714 | 3.44E-07 | ZNF529-AS1     | -5.273696736 | 2.83E-09 |
| AF241725.6    | 7.924878636 | 3.66E-07 | DUSP26         | -8.525617216 | 2.95E-09 |
| GINS4         | 2.031489432 | 3.91E-07 | PLPP3          | -5.627070568 | 2.96E-09 |
| EHBPI1L1      | 1.792657484 | 4.05E-07 | PHLDA3         | -7.570852467 | 3.02E-09 |
| DNAJC4        | 2.04947275  | 4.07E-07 | FILIP1L        | -7.662232146 | 3.21E-09 |
| RAP1GAP2      | 4.292559392 | 4.12E-07 | KCNE4          | -7.935718471 | 3.38E-09 |
| MYO1C         | 1.882132997 | 4.16E-07 | FAM212B-AS1    | -6.817557936 | 3.47E-09 |
| DSCC1         | 2.31735151  | 4.26E-07 | JARID2         | -1.748312874 | 3.53E-09 |
| CASZ1         | 3.693027205 | 4.28E-07 | ZNF724         | -7.444310404 | 3.66E-09 |
| MICE          | 3.083714381 | 4.31E-07 | NGFR           | -6.462276435 | 4.07E-09 |
| SLC44A3-AS1   | 5.830589531 | 4.44E-07 | TMEM179        | -9.231262094 | 4.07E-09 |
| LINC01583     | 6.789227152 | 4.51E-07 | GTF2IRD2B      | -3.719785254 | 4.12E-09 |
| LURAP1L-AS1   | 3.789069238 | 4.54E-07 | ZNF362         | -2.57010904  | 4.24E-09 |
| SCN5A         | 4.505321824 | 4.61E-07 | ABAT           | -4.674580115 | 4.30E-09 |
| ACSL4         | 2.253050982 | 4.65E-07 | TMEM154        | -8.223809462 | 4.37E-09 |

|               |             |          |               |              |          |
|---------------|-------------|----------|---------------|--------------|----------|
| GSDMD         | 3.635684488 | 4.65E-07 | ATL1          | -3.003787884 | 4.39E-09 |
| FGFR4         | 4.799967876 | 4.69E-07 | MTTP          | -5.89335954  | 4.46E-09 |
| ELOVL5        | 2.212994865 | 4.89E-07 | ABHD17B       | -1.733436895 | 4.83E-09 |
| FRRS1         | 2.964843836 | 4.93E-07 | C1orf61       | -6.822194754 | 4.91E-09 |
| KCNK13        | 4.974536378 | 5.17E-07 | TMEM108       | -4.299944648 | 4.96E-09 |
| CHD5          | 5.376680068 | 5.23E-07 | CALCRL        | -5.410894749 | 5.14E-09 |
| RP11-656D10.3 | 3.355014087 | 5.27E-07 | AMER2         | -8.862580022 | 5.22E-09 |
| CBX7          | 2.601754525 | 5.44E-07 | LINC02199     | -7.534188611 | 5.40E-09 |
| DARS2         | 2.296150259 | 5.48E-07 | NEDD9         | -7.188475463 | 5.53E-09 |
| PRR16         | 5.600692946 | 5.50E-07 | RHBDD2        | -3.845511535 | 5.83E-09 |
| RP11-195E2.1  | 7.057265458 | 5.59E-07 | TECTA         | -7.743850242 | 5.96E-09 |
| LVCAT1        | 5.211867124 | 6.09E-07 | ZIC4          | -8.146380871 | 6.18E-09 |
| TUBB6         | 3.27415385  | 6.31E-07 | RP11-428P16.2 | -7.86775702  | 6.18E-09 |
| BIK           | 5.971804006 | 6.31E-07 | PLXNA4        | -8.48024317  | 6.30E-09 |
| TUFT1         | 2.06422218  | 6.32E-07 | FBN1          | -4.137277214 | 6.33E-09 |
| APOBEC3C      | 2.037104548 | 6.34E-07 | RP11-71N10.1  | -8.619040808 | 6.40E-09 |
| NOVA1-AS1     | 2.538877294 | 6.37E-07 | ZNF781        | -7.818880084 | 6.49E-09 |
| SBSN          | 5.833322417 | 6.48E-07 | RP11-15H20.6  | -5.437567657 | 6.65E-09 |
| NDC80         | 1.885478018 | 6.58E-07 | C1orf94       | -8.827077991 | 6.75E-09 |
| MICB          | 4.316847305 | 6.70E-07 | TCF7L1        | -1.887735669 | 7.13E-09 |
| OSMR-AS1      | 4.848799816 | 7.28E-07 | NEU4          | -8.102452312 | 7.29E-09 |
| HLA-C         | 2.254181172 | 7.31E-07 | FGF13         | -7.459756937 | 7.48E-09 |
| HCFC1R1       | 2.47347224  | 7.42E-07 | LINC01550     | -8.085630697 | 7.55E-09 |
| CDC25C        | 1.700115583 | 7.59E-07 | FOXO1         | -1.923665028 | 7.86E-09 |
| SEC24D        | 1.699647125 | 7.72E-07 | RNF157        | -3.845677675 | 8.58E-09 |
| TRMT12        | 1.710909702 | 8.02E-07 | NOMO3         | -1.97768309  | 8.59E-09 |
| SLFN12L       | 6.520704362 | 8.22E-07 | NSUN5P1       | -2.567205263 | 9.04E-09 |
| MIR548XHG     | 6.517723896 | 8.96E-07 | HFM1          | -3.707314173 | 9.08E-09 |
| RP11-495K9.9  | 6.202264434 | 8.96E-07 | YPEL3         | -5.0035072   | 9.09E-09 |
| TFAP2C        | 4.732647929 | 9.35E-07 | EFNB2         | -3.784330275 | 9.60E-09 |
| CLEC2B        | 2.653662736 | 9.42E-07 | EIF4EBP2      | -1.583543798 | 9.86E-09 |
| SAMD12        | 6.111494055 | 9.50E-07 | ZNF582-AS1    | -7.903489168 | 9.86E-09 |
| SIGIRR        | 4.589014124 | 9.60E-07 | ART3          | -8.92987239  | 9.90E-09 |
| ETNK2         | 1.587366752 | 9.65E-07 | DYRK1A        | -1.57302506  | 1.10E-08 |
| AC007773.2    | 4.236120734 | 1.03E-06 | ARPP21        | -8.037769413 | 1.10E-08 |
| AC156455.1    | 4.687323369 | 1.04E-06 | RP11-255H23.2 | -6.803708505 | 1.10E-08 |
| RP11-25H12.1  | 6.900994063 | 1.07E-06 | HOXA7         | -6.678710098 | 1.11E-08 |
| VAV1          | 6.485448416 | 1.07E-06 | LINC01535     | -7.587569134 | 1.12E-08 |
| SP8           | 6.662064717 | 1.07E-06 | HYDIN2        | -7.68485573  | 1.26E-08 |
| KIF22         | 2.035682696 | 1.08E-06 | NOVA1         | -3.14922289  | 1.31E-08 |
| CCBE1         | 7.699538682 | 1.10E-06 | FBN3          | -9.076354861 | 1.35E-08 |
| AP3S1         | 1.833769151 | 1.11E-06 | MRPS17        | -2.813500722 | 1.36E-08 |
| DCAF6         | 1.605474642 | 1.12E-06 | TSC22D1       | -2.753393057 | 1.38E-08 |
| WIPI1         | 2.199242472 | 1.12E-06 | HOXD8         | -8.425698446 | 1.39E-08 |
| FCHO1         | 2.776417965 | 1.13E-06 | NALCN         | -7.485100974 | 1.39E-08 |
| MT2A          | 3.685100979 | 1.13E-06 | THBS2         | -6.224305204 | 1.46E-08 |
| GCLM          | 2.924993181 | 1.14E-06 | ATP10A        | -9.044377242 | 1.50E-08 |
| NOTUM         | 5.056976923 | 1.15E-06 | RAD54L2       | -1.652976576 | 1.59E-08 |
| PER1          | 3.098570984 | 1.20E-06 | URM1          | -2.854212069 | 1.63E-08 |
| SEH1L         | 2.020635887 | 1.21E-06 | EMILIN3       | -8.295601114 | 1.65E-08 |
| SHCBP1        | 1.510681798 | 1.22E-06 | TRIM24        | -2.676643359 | 1.70E-08 |
| CYP4F26P      | 5.220397301 | 1.28E-06 | LINC00403     | -7.699092752 | 1.72E-08 |
| PLEKHN1       | 5.383533565 | 1.28E-06 | GPC3          | -8.395769478 | 1.75E-08 |
| COPA          | 1.36073993  | 1.32E-06 | RIC3          | -7.784436663 | 1.90E-08 |
| PDIA5         | 2.017252978 | 1.36E-06 | PIP5K1B       | -8.099273    | 1.95E-08 |
| PLAG1         | 3.499824371 | 1.37E-06 | NPR2          | -3.536623637 | 1.98E-08 |
| BATF3         | 2.312783236 | 1.38E-06 | MTURN         | -2.353547582 | 1.99E-08 |
| FAM131C       | 4.525550992 | 1.44E-06 | RCOR2         | -2.846955055 | 2.15E-08 |
| LINC00659     | 6.365318386 | 1.52E-06 | BCORL1        | -1.797160233 | 2.18E-08 |
| ASL           | 2.032431243 | 1.53E-06 | KCND3         | -8.744996697 | 2.18E-08 |
| TM4SF1        | 2.042896698 | 1.53E-06 | LZTS1         | -4.845174792 | 2.20E-08 |
| ICAM5         | 4.104295751 | 1.55E-06 | PCDHB11       | -6.626659834 | 2.21E-08 |
| CLDN1         | 4.924402347 | 1.56E-06 | TRIM9         | -3.555181903 | 2.26E-08 |
| ESYT2         | 1.269970749 | 1.59E-06 | CDC42SE1      | -1.423495394 | 2.34E-08 |
| NKD2          | 4.543978384 | 1.60E-06 | AVL9          | -2.031096303 | 2.38E-08 |
| RAB27A        | 1.793352869 | 1.61E-06 | CTD-2245F17.3 | -8.32753367  | 2.40E-08 |
| RP13-463N16.6 | 7.120883305 | 1.64E-06 | AHCYL2        | -3.107472138 | 2.54E-08 |
| REEP6         | 2.747845644 | 1.64E-06 | C1orf56       | -5.000468537 | 2.65E-08 |

|               |             |          |               |              |          |
|---------------|-------------|----------|---------------|--------------|----------|
| CSAG4         | 6.892698854 | 1.65E-06 | HOXD11        | -6.65021582  | 2.73E-08 |
| CFH           | 4.434859221 | 1.65E-06 | CTD-2291D10.4 | -7.697930084 | 2.78E-08 |
| GPR39         | 5.688826339 | 1.65E-06 | IDUA          | -7.665887637 | 2.81E-08 |
| CLINT1        | 1.459013568 | 1.67E-06 | RP11-448P19.1 | -8.466375954 | 2.88E-08 |
| ICOSLG        | 4.677805147 | 1.73E-06 | BDH2          | -2.602569511 | 2.91E-08 |
| ZBTB7B        | 1.825271449 | 1.77E-06 | RGS6          | -8.116777337 | 2.91E-08 |
| GRIP1         | 6.814249783 | 1.79E-06 | TOR1A         | -2.750079149 | 3.11E-08 |
| DERL1         | 1.81614536  | 1.81E-06 | FARP1         | -2.829871658 | 3.18E-08 |
| DHRS3         | 6.676793674 | 1.84E-06 | DAB1          | -8.110970716 | 3.31E-08 |
| C10orf35      | 3.689413158 | 1.84E-06 | PXDN          | -1.571777527 | 3.34E-08 |
| IER2          | 2.046300321 | 1.87E-06 | UGGT1         | -1.915996479 | 3.57E-08 |
| PLBD1-AS1     | 6.911744437 | 1.87E-06 | SSBP3         | -1.912885399 | 3.64E-08 |
| NUDT8         | 3.004048672 | 1.91E-06 | GNAI1         | -2.266042737 | 3.70E-08 |
| ZC3H12A       | 2.846977729 | 1.98E-06 | ATAT1         | -1.772771174 | 3.82E-08 |
| ERRF1         | 2.245704251 | 1.99E-06 | ZC3H4         | -1.829162559 | 3.83E-08 |
| MRPL13        | 2.013787244 | 2.00E-06 | MCAM          | -2.717888117 | 3.92E-08 |
| FAM95C        | 6.86653314  | 2.08E-06 | KLRC4-KLRK1   | -7.827849964 | 3.93E-08 |
| ISL1          | 6.806063501 | 2.12E-06 | GPX3          | -7.586653029 | 4.02E-08 |
| ZNF692        | 1.745599356 | 2.27E-06 | TECPR2        | -2.859290907 | 4.14E-08 |
| COL17A1       | 6.70896012  | 2.34E-06 | ANKRD7        | -6.584471336 | 4.16E-08 |
| OSBPL10       | 1.898111641 | 2.34E-06 | APBB2         | -2.016174325 | 4.24E-08 |
| LINC01036     | 6.818139675 | 2.35E-06 | CASP2         | -1.930698257 | 4.25E-08 |
| CCDC7         | 2.031794083 | 2.35E-06 | RP11-472N13.3 | -7.835931094 | 4.56E-08 |
| LINC01273     | 5.680137692 | 2.37E-06 | LINC01105     | -8.210805291 | 4.78E-08 |
| RNF139-AS1    | 2.092008006 | 2.49E-06 | HIST1H2AC     | -2.827217506 | 4.87E-08 |
| TCAM1P        | 7.293955208 | 2.51E-06 | RP4-756G23.5  | -7.97797169  | 5.04E-08 |
| ATAD2         | 1.758292203 | 2.57E-06 | SNTG1         | -8.861365597 | 5.27E-08 |
| RP11-284F21.7 | 4.128882055 | 2.63E-06 | PTPRD-AS1     | -7.51830869  | 5.39E-08 |
| CTC1          | 1.799988321 | 2.65E-06 | FKBP9         | -4.452799388 | 5.47E-08 |
| ALOX12B       | 5.352522856 | 2.66E-06 | CALM1         | -3.04562266  | 5.56E-08 |
| PRSS16        | 4.846260439 | 2.66E-06 | RP11-496D24.2 | -7.031095606 | 5.62E-08 |
| CGB2          | 6.747292713 | 2.68E-06 | C1orf54       | -6.838687744 | 5.86E-08 |
| RP11-402J6.1  | 6.757541223 | 2.72E-06 | MYO16         | -8.760883412 | 5.90E-08 |
| LMLN-AS1      | 5.648446421 | 2.82E-06 | NAA16         | -1.696138497 | 6.02E-08 |
| RP11-519M16.1 | 6.69772685  | 2.85E-06 | CREB3L1       | -8.518968892 | 6.58E-08 |
| LACTB2        | 1.79429672  | 2.86E-06 | TAOK3         | -2.790647027 | 6.63E-08 |
| CEP295        | 1.572774351 | 2.95E-06 | PLCG1         | -2.005319028 | 6.65E-08 |
| SLC7A5        | 2.344790914 | 3.00E-06 | MMP16         | -2.885515091 | 6.65E-08 |
| LINC00460     | 3.729442416 | 3.14E-06 | KCNAB3        | -3.517345913 | 6.77E-08 |
| ASPH          | 2.246488196 | 3.23E-06 | GLI3          | -2.693784032 | 6.78E-08 |
| RP11-491I11.1 | 3.617485545 | 3.44E-06 | SYT11         | -3.310530806 | 6.79E-08 |
| SPRYD3        | 2.01858611  | 3.45E-06 | PLEKHB2       | -1.469004499 | 6.89E-08 |
| MTND6P21      | 6.767640478 | 3.51E-06 | TNS3          | -5.113245881 | 7.14E-08 |
| EDARADD       | 4.151564967 | 3.53E-06 | MAMDC2-AS1    | -3.933905485 | 7.18E-08 |
| RP11-66B24.1  | 6.774858729 | 3.65E-06 | STARD9        | -1.495835056 | 7.29E-08 |
| PSMG2         | 1.600887281 | 3.68E-06 | TMEM170A      | -1.92049578  | 7.48E-08 |
| RP11-575F12.1 | 6.731795954 | 3.72E-06 | HIBADH        | -1.630515359 | 7.53E-08 |
| LRRC73        | 3.648509954 | 3.74E-06 | NEB           | -5.359146876 | 7.60E-08 |
| GRK3          | 2.903328225 | 3.76E-06 | TSPAN11       | -8.615608089 | 7.61E-08 |
| P2RY2         | 4.956249106 | 3.85E-06 | LINC00265     | -1.778749128 | 7.71E-08 |
| TSPAN2        | 6.937036044 | 3.93E-06 | DOK5          | -7.796575297 | 7.73E-08 |
| RP11-148O21.4 | 6.908853839 | 3.99E-06 | DPP6          | -7.448093195 | 7.77E-08 |
| RP11-326A19.4 | 4.369169949 | 4.03E-06 | TSN           | -1.817214094 | 8.25E-08 |
| PLP2          | 2.453788251 | 4.12E-06 | SRD5A1        | -1.953186578 | 8.28E-08 |
| IFT57         | 1.45190077  | 4.23E-06 | STK33         | -8.564881991 | 8.35E-08 |
| MGAT4B        | 1.432445544 | 4.32E-06 | ARHGAP21      | -1.782212896 | 8.36E-08 |
| C8orf59       | 1.726836254 | 4.36E-06 | RPE65         | -7.032590115 | 8.47E-08 |
| HCG25         | 2.351298305 | 4.45E-06 | LDLRAD3       | -2.164772284 | 8.53E-08 |
| PRDM15        | 1.324954751 | 4.56E-06 | RAMP2-AS1     | -8.60775794  | 8.64E-08 |
| RP11-268G12.3 | 4.200333373 | 4.56E-06 | PARP11        | -2.454731806 | 8.87E-08 |
| WNT2B         | 3.059556555 | 4.99E-06 | ZSCAN21       | -1.697076628 | 9.29E-08 |
| METTL23       | 1.355119318 | 5.01E-06 | ITGA11        | -8.065481368 | 1.00E-07 |
| RP11-403I13.5 | 6.607682454 | 5.12E-06 | HOXB13        | -8.108059774 | 1.08E-07 |
| RP11-802E16.3 | 3.829069566 | 5.16E-06 | MEX3A         | -1.907301753 | 1.09E-07 |
| HOXB4         | 4.02657126  | 5.22E-06 | CNTFR         | -7.594799677 | 1.15E-07 |
| LBX2          | 5.427944399 | 5.25E-06 | DDN           | -6.485112482 | 1.16E-07 |
| MCUB          | 2.459460478 | 5.40E-06 | IPO9          | -1.691754838 | 1.18E-07 |
| ABHD14B       | 1.769971385 | 5.59E-06 | FTX           | -2.006892193 | 1.18E-07 |

|               |             |          |               |              |          |
|---------------|-------------|----------|---------------|--------------|----------|
| AKAP12        | 3.582451821 | 5.60E-06 | IL6ST         | -2.547443899 | 1.18E-07 |
| RP1-28O10.1   | 6.740643804 | 5.65E-06 | FHIT          | -3.500481858 | 1.19E-07 |
| NFKB2         | 1.785925269 | 5.75E-06 | DSCAML1       | -7.267352456 | 1.21E-07 |
| CA13          | 1.724515939 | 5.85E-06 | MOAP1         | -1.649148768 | 1.25E-07 |
| QLC3          | 1.511373337 | 6.02E-06 | GPR75         | -3.191995755 | 1.26E-07 |
| ZNF280A       | 6.254061821 | 6.03E-06 | LMO4          | -2.141140155 | 1.26E-07 |
| INTS8         | 1.768235684 | 6.10E-06 | ZNF117        | -4.120366935 | 1.28E-07 |
| SLC9A7        | 2.387908572 | 6.12E-06 | CLEC4F        | -5.476451894 | 1.28E-07 |
| RNF19B        | 2.087396167 | 6.12E-06 | RFC2          | -2.343146498 | 1.32E-07 |
| LINC01037     | 6.270344811 | 6.20E-06 | KATNAL2       | -3.382314823 | 1.36E-07 |
| RP11-64D22.5  | 6.670237088 | 6.25E-06 | ID3           | -3.408057246 | 1.45E-07 |
| MSRB3         | 2.358771729 | 6.61E-06 | FMNL2         | -2.0567261   | 1.48E-07 |
| PTHLH         | 4.026781908 | 6.74E-06 | LINC01415     | -8.371321319 | 1.48E-07 |
| RHBDD1        | 1.633073166 | 7.03E-06 | DACT3         | -4.782381239 | 1.49E-07 |
| RP3-522D1.1   | 3.049267853 | 7.07E-06 | ZKSCAN3       | -2.032009982 | 1.50E-07 |
| PLGRKT        | 1.75562491  | 7.40E-06 | TOX3          | -8.513050805 | 1.50E-07 |
| DOC2GP        | 4.240544738 | 7.46E-06 | MAPRE2        | -2.258173208 | 1.55E-07 |
| CHTF18        | 2.729195271 | 7.49E-06 | PHTF2         | -2.110360977 | 1.56E-07 |
| CAV2          | 2.607289905 | 7.52E-06 | ZNF429        | -4.22913794  | 1.58E-07 |
| LINC01703     | 3.063371686 | 7.75E-06 | ETV1          | -2.039385166 | 1.60E-07 |
| LINC01186     | 6.337343389 | 7.82E-06 | DPYSL5        | -2.41613775  | 1.60E-07 |
| PRKAG2        | 3.10829687  | 7.97E-06 | PCDHB12       | -4.445327016 | 1.60E-07 |
| SACS          | 2.252386019 | 8.15E-06 | RAMP2         | -7.946178774 | 1.62E-07 |
| HSD17B14      | 3.767280143 | 8.33E-06 | C7orf49       | -1.897189854 | 1.68E-07 |
| DHRS2         | 3.877385968 | 8.48E-06 | CRABP1        | -8.200511103 | 1.72E-07 |
| STK3          | 1.842450934 | 8.49E-06 | GSK3B         | -1.865462316 | 1.81E-07 |
| BCRP2         | 6.089677043 | 8.92E-06 | MLYCD         | -2.358479961 | 1.84E-07 |
| DNAH17-AS1    | 6.671372493 | 8.96E-06 | ADCYAP1R1     | -8.568914004 | 1.84E-07 |
| AADACP1       | 7.060145573 | 9.01E-06 | EP300         | -1.649613285 | 1.87E-07 |
| GAPLINC       | 6.488946566 | 9.04E-06 | SLC25A29      | -2.248481258 | 1.87E-07 |
| GGH           | 1.690024189 | 9.13E-06 | KMT2C         | -1.997615406 | 1.89E-07 |
| LL22NC03-86G7 | 4.727001344 | 9.25E-06 | HAND2-AS1     | -7.871059918 | 1.90E-07 |
| NUF2          | 1.692206242 | 9.42E-06 | CHRM1         | -7.240024674 | 1.90E-07 |
| AC073130.3    | 6.442162012 | 9.95E-06 | TSPAN12       | -3.791941242 | 2.02E-07 |
| PCDHB6        | 4.284167385 | 1.01E-05 | KLHDC8A       | -7.188530969 | 2.07E-07 |
| VAT1L         | 7.489768673 | 1.05E-05 | TSPAN14       | -2.315003229 | 2.08E-07 |
| SLC7A11       | 2.225019393 | 1.05E-05 | NINJ2         | -6.911686183 | 2.15E-07 |
| CRNDE         | 1.661141577 | 1.07E-05 | LRRC4C        | -4.841782525 | 2.19E-07 |
| XXyac-YM21GA  | 6.615020672 | 1.08E-05 | SNN           | -4.293138139 | 2.19E-07 |
| SYNGR2        | 3.255089625 | 1.09E-05 | HES1          | -6.804834893 | 2.20E-07 |
| GATA3         | 4.587389185 | 1.10E-05 | CTC-543D15.8  | -7.521818143 | 2.35E-07 |
| CH17-472G23.2 | 3.37406725  | 1.11E-05 | ZNF790-AS1    | -7.2818115   | 2.38E-07 |
| RP11-54A9.1   | 7.48207227  | 1.12E-05 | MTFR1L        | -1.630826464 | 2.48E-07 |
| PPP2R3A       | 1.839795585 | 1.12E-05 | ATP2B1        | -2.479504465 | 2.50E-07 |
| MTFR1         | 1.679659048 | 1.12E-05 | GPR156        | -5.196448605 | 2.51E-07 |
| KHDRBS2       | 6.558804198 | 1.13E-05 | GPR155        | -3.944168043 | 2.57E-07 |
| ALDH7A1       | 1.64177603  | 1.13E-05 | PIPOX         | -6.204250135 | 2.58E-07 |
| UTP23         | 1.74213718  | 1.15E-05 | SCN3A         | -6.130215416 | 2.60E-07 |
| RP5-1139I1.1  | 6.931226549 | 1.15E-05 | CA8           | -7.615048346 | 2.67E-07 |
| SNHG6         | 1.619245894 | 1.16E-05 | BAG5          | -1.463471935 | 2.69E-07 |
| RILP          | 2.948389258 | 1.16E-05 | CDKN2C        | -2.585768632 | 2.71E-07 |
| ADAMTS2       | 6.835618425 | 1.19E-05 | PLEKHH2       | -2.333159992 | 2.95E-07 |
| MSC           | 6.418676483 | 1.20E-05 | CTD-2017D11.1 | -3.960102808 | 2.97E-07 |
| PTPRF         | 2.346133855 | 1.20E-05 | ARGLU1        | -1.907938535 | 2.99E-07 |
| TMEM244       | 6.446484348 | 1.22E-05 | PTCH1         | -2.850126841 | 2.99E-07 |
| CORO1B        | 2.39135338  | 1.23E-05 | PMP22         | -1.686197621 | 3.16E-07 |
| RECQL         | 1.531731314 | 1.24E-05 | VAMP5         | -7.736934812 | 3.24E-07 |
| ARHGAP29      | 4.987765888 | 1.26E-05 | CDH2          | -3.41840142  | 3.32E-07 |
| RAET1E        | 5.356798537 | 1.26E-05 | RP11-290O12.2 | -7.111607088 | 3.32E-07 |
| TTPA          | 1.908082052 | 1.27E-05 | GAS2          | -5.162235767 | 3.33E-07 |
| DCUN1D5       | 2.108779238 | 1.32E-05 | MAP1A         | -4.195995788 | 3.39E-07 |
| CWF19L2       | 1.61379868  | 1.33E-05 | NAALAD2       | -7.935443856 | 3.40E-07 |
| RP11-162D16.2 | 6.403115552 | 1.33E-05 | RASSF2        | -2.877848345 | 3.47E-07 |
| IGSF1         | 5.118692232 | 1.34E-05 | LRP4          | -3.769580609 | 3.49E-07 |
| BTNL8         | 7.586761091 | 1.36E-05 | RP9P          | -3.261884755 | 3.67E-07 |
| MAP3K14       | 2.040029072 | 1.39E-05 | IFI27L1       | -2.049833197 | 3.69E-07 |
| RP11-60A8.1   | 7.059636969 | 1.42E-05 | PPP1R1B       | -8.430361447 | 3.74E-07 |
| MYL12A        | 2.238812181 | 1.42E-05 | RP11-329B9.4  | -3.828846578 | 3.74E-07 |

|               |             |          |                |              |          |
|---------------|-------------|----------|----------------|--------------|----------|
| DYRK3         | 1.566193026 | 1.43E-05 | PREX1          | -3.119859533 | 3.81E-07 |
| RP11-462L8.1  | 2.684911141 | 1.43E-05 | C3AR1          | -7.681887624 | 3.88E-07 |
| SLC1A5        | 2.455219237 | 1.45E-05 | SECISBP2L      | -1.795157252 | 4.09E-07 |
| SLC22A5       | 3.356202981 | 1.46E-05 | C21orf62       | -8.318048444 | 4.12E-07 |
| CCT4          | 1.474237762 | 1.51E-05 | ELAVL4         | -7.968105052 | 4.13E-07 |
| RNMT          | 1.890106209 | 1.51E-05 | EIF4H          | -1.658449733 | 4.28E-07 |
| RP11-535M15.1 | 6.836140007 | 1.53E-05 | TSC22D4        | -2.930594811 | 4.35E-07 |
| SPOCK3        | 6.329898052 | 1.53E-05 | SETBP1         | -7.623236886 | 4.36E-07 |
| MSL3P1        | 6.358039667 | 1.60E-05 | DDR2           | -2.897682051 | 4.44E-07 |
| HSD11B2       | 5.026868    | 1.60E-05 | STMN3          | -4.766113492 | 4.59E-07 |
| ADCY7         | 2.979349539 | 1.61E-05 | RP11-488C13.5  | -2.246146887 | 4.77E-07 |
| MPP3          | 1.949467635 | 1.61E-05 | NNT-AS1        | -2.064197224 | 5.02E-07 |
| NUDT22        | 1.845685503 | 1.64E-05 | CHRNA1         | -8.095522574 | 5.03E-07 |
| PLSCR1        | 1.572589187 | 1.64E-05 | CLASP1         | -1.87962099  | 5.14E-07 |
| CD7           | 7.099517001 | 1.67E-05 | STXBP6         | -3.537600572 | 5.23E-07 |
| CFD           | 4.508607275 | 1.67E-05 | GRIK1          | -8.236882397 | 5.27E-07 |
| METTL4        | 1.536763995 | 1.67E-05 | TCF12          | -1.720337644 | 5.29E-07 |
| RP11-134G8.5  | 3.127231423 | 1.71E-05 | SELENOP        | -6.646577824 | 5.44E-07 |
| NEBL          | 4.522355671 | 1.73E-05 | SRGAP3         | -3.750123528 | 5.48E-07 |
| NEK2          | 1.397007791 | 1.74E-05 | DGKB           | -7.637144541 | 5.55E-07 |
| LINC01694     | 4.575615416 | 1.74E-05 | LINC00391      | -7.146426634 | 5.71E-07 |
| RPL7          | 1.459415794 | 1.83E-05 | CTA-293F17.1   | -4.702427301 | 5.76E-07 |
| TMEM14A       | 2.036706921 | 1.83E-05 | AC010729.1     | -7.260223812 | 5.96E-07 |
| MARCH3        | 2.209893142 | 1.84E-05 | IGF2R          | -2.053806072 | 6.01E-07 |
| ITGB4         | 3.640100631 | 1.84E-05 | FABP3          | -7.747128444 | 6.13E-07 |
| NRIP3         | 4.999236115 | 1.84E-05 | ZNF428         | -2.728824689 | 6.19E-07 |
| CEP57         | 1.613756419 | 1.93E-05 | CDHR1          | -7.499802815 | 6.31E-07 |
| RHPN2         | 1.431673136 | 1.93E-05 | MEGF9          | -2.374344931 | 6.31E-07 |
| FBXL8         | 1.733355167 | 1.93E-05 | YAE1D1         | -1.510469401 | 6.41E-07 |
| IGFN1         | 5.37807095  | 1.93E-05 | IRS2           | -1.791708871 | 6.76E-07 |
| ANKRD34A      | 1.846622896 | 1.95E-05 | USP11          | -1.909865811 | 6.84E-07 |
| RP11-148O21.3 | 6.106927561 | 2.05E-05 | RP11-617F23.1  | -3.124766954 | 6.90E-07 |
| NOXA1         | 4.590671454 | 2.06E-05 | UPF3A          | -1.593880475 | 6.92E-07 |
| CHCHD10       | 1.685787785 | 2.07E-05 | CBX2           | -1.938858457 | 7.31E-07 |
| JMJ3D6        | 1.53374278  | 2.07E-05 | MARVELD1       | -1.944570686 | 7.37E-07 |
| TPD52         | 2.862086799 | 2.08E-05 | KLRC4          | -7.755224737 | 7.61E-07 |
| CIB1          | 1.975761493 | 2.09E-05 | WIPF3          | -6.084224839 | 7.77E-07 |
| FAM227A       | 2.020644878 | 2.13E-05 | GTF2IRD2       | -3.802822639 | 7.78E-07 |
| YARS2         | 1.801488105 | 2.18E-05 | USP32P3        | -2.482787701 | 8.01E-07 |
| EGFL7         | 3.38536721  | 2.19E-05 | ACP2           | -2.20655722  | 8.09E-07 |
| RP13-977J11.2 | 4.165965675 | 2.22E-05 | C6orf52        | -3.754987247 | 8.14E-07 |
| HIVEP2        | 2.651215167 | 2.24E-05 | RP11-480I12.9  | -3.362314911 | 8.24E-07 |
| TRAF1         | 2.355712267 | 2.24E-05 | WDR91          | -1.961959135 | 8.27E-07 |
| GPRC5A        | 2.739553481 | 2.26E-05 | GOLIM4         | -1.766557423 | 8.38E-07 |
| PGM5P2        | 1.910117592 | 2.30E-05 | ZNF726         | -5.148445832 | 8.73E-07 |
| XKR9          | 3.57442536  | 2.41E-05 | RP11-611L7.2   | -4.304779814 | 8.76E-07 |
| ENO1-IT1      | 2.386887831 | 2.46E-05 | RAB39A         | -2.63991549  | 9.06E-07 |
| IRX3          | 2.442739043 | 2.47E-05 | DIP2B          | -1.988339997 | 9.50E-07 |
| FAM72D        | 2.224275534 | 2.49E-05 | PNMAL2         | -7.418551756 | 9.58E-07 |
| RGS5          | 2.484751525 | 2.49E-05 | RNASE1         | -6.964960939 | 9.83E-07 |
| SENCR         | 6.08542527  | 2.56E-05 | EYA4           | -8.961759465 | 9.99E-07 |
| LDOC1         | 1.759039104 | 2.59E-05 | RP11-277P12.2C | -2.86194715  | 1.03E-06 |
| SYCP2L        | 4.087907768 | 2.59E-05 | RNF122         | -2.087607451 | 1.03E-06 |
| CARMIL2       | 3.323888319 | 2.66E-05 | SATB2          | -2.653640328 | 1.04E-06 |
| FAM91A1       | 1.674245702 | 2.72E-05 | ARHGAP31       | -2.013985984 | 1.04E-06 |
| ZNF438        | 1.506994198 | 2.75E-05 | ZNF582         | -3.09410555  | 1.06E-06 |
| GDPD5         | 3.08011749  | 2.81E-05 | SPP1           | -8.555276201 | 1.07E-06 |
| EPS8L2        | 3.084997859 | 2.89E-05 | RP11-966I7.2   | -7.196263744 | 1.09E-06 |
| NAP1L3        | 3.01901456  | 2.91E-05 | ZKSCAN2        | -1.963998383 | 1.10E-06 |
| AK7           | 3.84364141  | 2.99E-05 | PTPRA          | -1.998838714 | 1.10E-06 |
| ASAP2         | 1.226637135 | 3.03E-05 | B4GALNT3       | -4.457473266 | 1.12E-06 |
| TRIB3         | 2.504197396 | 3.09E-05 | DOLPP1         | -2.518584887 | 1.15E-06 |
| PRELID2       | 2.769968727 | 3.11E-05 | ZNF157         | -5.307676041 | 1.20E-06 |
| HSPA1L        | 2.084791325 | 3.12E-05 | WWTR1          | -3.078049584 | 1.22E-06 |
| LAS1L         | 1.782298979 | 3.15E-05 | PLCH1          | -4.604689477 | 1.27E-06 |
| C6orf1        | 2.608738581 | 3.16E-05 | ENTPD1         | -5.669436679 | 1.28E-06 |
| HIF1A-AS2     | 6.404846376 | 3.20E-05 | H2AFV          | -1.989108523 | 1.28E-06 |
| LAMP3         | 4.373717262 | 3.20E-05 | RP11-25K19.1   | -5.405367611 | 1.31E-06 |

|               |             |          |               |              |          |
|---------------|-------------|----------|---------------|--------------|----------|
| FMN2          | 2.896931178 | 3.22E-05 | SSPN          | -5.155750258 | 1.33E-06 |
| SLU7          | 1.473450764 | 3.22E-05 | SNX18         | -2.917330113 | 1.33E-06 |
| HEBP2         | 1.588958192 | 3.35E-05 | A2M           | -7.803565545 | 1.36E-06 |
| RP11-527N22.2 | 5.339134282 | 3.42E-05 | FAM69C        | -7.049023183 | 1.36E-06 |
| TMED3         | 1.539236874 | 3.59E-05 | E2F3          | -2.939029264 | 1.38E-06 |
| IL6R          | 2.767996341 | 3.61E-05 | STIM2         | -1.92396479  | 1.38E-06 |
| ARFGEF1       | 1.772181883 | 3.69E-05 | CPVL          | -6.316671589 | 1.39E-06 |
| GOT1          | 1.431330006 | 3.74E-05 | PCDHGA9       | -6.37877329  | 1.43E-06 |
| SDC4          | 1.475645055 | 3.74E-05 | ZNF570        | -2.405767216 | 1.44E-06 |
| PSTPIP2       | 2.035974703 | 3.75E-05 | RP11-4O1.2    | -4.615001879 | 1.45E-06 |
| CTC-378H22.1  | 6.534646783 | 3.76E-05 | GS1-24F4.2    | -6.779841943 | 1.45E-06 |
| SCNN1A        | 6.306270098 | 3.76E-05 | IQGAP2        | -6.45493982  | 1.51E-06 |
| MYH9          | 1.611472476 | 3.78E-05 | ZNF436        | -2.105896892 | 1.55E-06 |
| MRE11         | 1.47349534  | 3.78E-05 | MVB12B        | -1.836275973 | 1.57E-06 |
| KCTD8         | 4.173064287 | 3.79E-05 | FNTB          | -1.997061983 | 1.60E-06 |
| CT45A1        | 6.249095502 | 3.82E-05 | MMP11         | -4.666912154 | 1.60E-06 |
| SPAG5         | 1.444661329 | 3.84E-05 | MAP1LC3A      | -7.379274997 | 1.78E-06 |
| FAM72B        | 2.151622872 | 3.85E-05 | AGMO          | -6.104132665 | 1.81E-06 |
| RP11-686D22.8 | 6.198503793 | 3.99E-05 | MYEF2         | -2.082989992 | 1.84E-06 |
| C19orf12      | 1.45752136  | 4.01E-05 | AP002954.3    | -3.351638835 | 1.87E-06 |
| KHNYN         | 1.433067726 | 4.02E-05 | UTP14C        | -1.529938232 | 1.92E-06 |
| MFSD13B       | 5.779481009 | 4.10E-05 | ZSWIM6        | -2.403045418 | 2.02E-06 |
| SLC22A4       | 3.393892488 | 4.12E-05 | H19           | -5.533234603 | 2.07E-06 |
| LIF           | 3.366762223 | 4.20E-05 | ABCA12        | -6.827329406 | 2.15E-06 |
| CTDSPL        | 1.34538877  | 4.21E-05 | ZNF430        | -1.528009521 | 2.21E-06 |
| FBXO28        | 1.629398402 | 4.25E-05 | LANCL2        | -2.013564318 | 2.23E-06 |
| NSMCE2        | 1.72261495  | 4.29E-05 | KCNIP2        | -2.6298532   | 2.25E-06 |
| CTF1          | 3.875202164 | 4.31E-05 | PEAK1         | -1.85409197  | 2.26E-06 |
| DDX10         | 1.725076038 | 4.31E-05 | RP11-480I12.5 | -2.908564525 | 2.28E-06 |
| MAGEA2        | 6.225964748 | 4.32E-05 | NR2F1-AS1     | -2.868865851 | 2.32E-06 |
| RP11-531A24.5 | 2.303603847 | 4.33E-05 | LYNX1         | -7.396014617 | 2.35E-06 |
| BIRC3         | 4.058512438 | 4.34E-05 | AK1           | -2.930008372 | 2.39E-06 |
| GABRD         | 4.418032104 | 4.42E-05 | PHACTR1       | -6.182714971 | 2.39E-06 |
| LINC00706     | 6.476287527 | 4.44E-05 | ZNF425        | -3.506601368 | 2.43E-06 |
| PTPN2         | 2.132937987 | 4.57E-05 | PRSS35        | -7.592427111 | 2.44E-06 |
| HSD17B11      | 1.424828471 | 4.58E-05 | DENND5A       | -1.518925004 | 2.45E-06 |
| SERPINA1      | 5.951116786 | 4.60E-05 | SEMA4A        | -3.958432841 | 2.46E-06 |
| F8            | 1.958369945 | 4.61E-05 | ADGRL2        | -4.221479784 | 2.51E-06 |
| ZFYVE19       | 2.195482656 | 4.68E-05 | CXCR4         | -5.419354816 | 2.53E-06 |
| FSIP2-AS1     | 3.101133259 | 4.68E-05 | ABTB2         | -2.737344682 | 2.57E-06 |
| ANKRD20A21P   | 5.8115734   | 4.74E-05 | NCOA5         | -1.940734617 | 2.57E-06 |
| AC012485.2    | 5.923739888 | 4.79E-05 | CDK2AP1       | -2.00372139  | 2.57E-06 |
| ARHGAP19      | 1.214350342 | 4.81E-05 | LY6G5C        | -4.083229345 | 2.57E-06 |
| BAIAP2        | 2.052515418 | 4.82E-05 | NUDT3         | -1.637251599 | 2.61E-06 |
| COA6          | 1.770294751 | 4.90E-05 | ZC3H7A        | -1.556624236 | 2.63E-06 |
| AC007879.5    | 3.074641483 | 4.97E-05 | SORCS3        | -7.475381403 | 2.64E-06 |
| TMEM151A      | 4.304951232 | 5.04E-05 | GBGT1         | -7.258447304 | 2.72E-06 |
| WDYHV1        | 1.76547478  | 5.05E-05 | DNM3OS        | -7.790383001 | 2.74E-06 |
| AARS          | 1.429283699 | 5.07E-05 | TRIM46        | -2.255560482 | 2.76E-06 |
| RPL30         | 1.484595814 | 5.11E-05 | FAM110C       | -6.868585317 | 2.79E-06 |
| ABCB7         | 1.540121436 | 5.11E-05 | DAGLA         | -2.215702492 | 2.83E-06 |
| KCNH3         | 4.130173125 | 5.11E-05 | PNMA6A        | -6.664836396 | 2.84E-06 |
| TRIM7         | 2.819998212 | 5.32E-05 | SERHL2        | -6.70343082  | 2.88E-06 |
| LINC01006     | 3.63077232  | 5.60E-05 | RP11-1217F2.1 | -2.58704717  | 2.93E-06 |
| SLC16A7       | 5.556371159 | 5.66E-05 | KRCC1         | -1.591256356 | 2.97E-06 |
| SYNPO         | 2.573724643 | 5.76E-05 | ZDHHC15       | -2.442360766 | 3.07E-06 |
| GPR18         | 6.108106477 | 5.76E-05 | TIA1          | -1.927848441 | 3.09E-06 |
| CMBL          | 1.123094417 | 5.88E-05 | KLRC3         | -6.660664937 | 3.13E-06 |
| RAB3B         | 2.334459043 | 5.93E-05 | SLC25A25      | -2.564863044 | 3.18E-06 |
| CEP126        | 4.765219743 | 5.93E-05 | GOLGA2        | -2.170339054 | 3.30E-06 |
| LRRFIP1       | 1.871229807 | 5.98E-05 | JAG1          | -4.421832899 | 3.35E-06 |
| AC079922.3    | 1.956902709 | 5.98E-05 | ZHX2          | -2.734538351 | 3.39E-06 |
| WDR4          | 1.877400742 | 6.14E-05 | NNT           | -1.688072149 | 3.50E-06 |
| DPM3          | 2.452919188 | 6.16E-05 | CLK4          | -1.941223901 | 3.54E-06 |
| CH17-472G23.4 | 1.693241182 | 6.19E-05 | TICAM1        | -6.409461793 | 3.65E-06 |
| SLC22A31      | 6.404361955 | 6.21E-05 | MIER3         | -2.020480536 | 3.67E-06 |
| TESC          | 4.034938023 | 6.24E-05 | NRIP1         | -1.552155897 | 3.74E-06 |
| TRIM6         | 3.341998393 | 6.33E-05 | ACAD8         | -1.751444729 | 3.84E-06 |

|                |             |          |               |              |          |
|----------------|-------------|----------|---------------|--------------|----------|
| MESP2          | 6.064005094 | 6.39E-05 | SLC12A8       | -5.863900494 | 3.88E-06 |
| RP11-564D11.3  | 2.831109385 | 6.41E-05 | KLHL14        | -6.76944669  | 3.91E-06 |
| DDIT3          | 2.215673428 | 6.49E-05 | ADAMTS15      | -6.455448723 | 3.96E-06 |
| ATM            | 1.287728998 | 6.59E-05 | RP11-126K1.6  | -3.730455453 | 3.98E-06 |
| SLC50A1        | 1.565384987 | 6.64E-05 | BMF           | -4.069333969 | 4.10E-06 |
| ACTN1          | 1.184788077 | 6.70E-05 | ZSCAN25       | -1.732893065 | 4.23E-06 |
| CLNS1A         | 1.126096736 | 6.84E-05 | TBX15         | -4.171671145 | 4.24E-06 |
| AP003900.6     | 6.142594363 | 7.05E-05 | PRR18         | -6.298117461 | 4.25E-06 |
| FHL2           | 3.387355058 | 7.06E-05 | CD207         | -5.178703944 | 4.26E-06 |
| AC073130.1     | 6.12655016  | 7.07E-05 | SMURF1        | -1.33102264  | 4.27E-06 |
| SIL1           | 1.740002194 | 7.11E-05 | KLHL7         | -1.719891504 | 4.28E-06 |
| QSOX1          | 1.834396104 | 7.19E-05 | ZDHHC22       | -5.533750026 | 4.32E-06 |
| FAM86B3P       | 1.958737718 | 7.41E-05 | CBSL          | -3.91480754  | 4.45E-06 |
| RP11-280G9.1   | 6.171046787 | 7.41E-05 | SORCS2        | -6.471728621 | 4.77E-06 |
| TLL2           | 4.082117802 | 7.48E-05 | CHADL         | -6.890250281 | 4.81E-06 |
| CYBR2          | 4.606681285 | 7.55E-05 | FAM214A       | -1.950336965 | 4.87E-06 |
| RPL12          | 1.429467442 | 7.62E-05 | BCL7B         | -2.769198511 | 4.94E-06 |
| FBXO43         | 2.380969891 | 7.84E-05 | PEBP1         | -1.756583715 | 5.01E-06 |
| RP11-495P10.10 | 1.936887807 | 8.03E-05 | AC078842.3    | -6.312706899 | 5.01E-06 |
| FAR2P1         | 4.936531953 | 8.05E-05 | PAQR6         | -2.277732777 | 5.05E-06 |
| HSPA9          | 1.249272179 | 8.05E-05 | KCNN2         | -6.800474237 | 5.19E-06 |
| PEPD           | 2.039501264 | 8.10E-05 | PLXNB3        | -3.407645123 | 5.28E-06 |
| KLC3           | 6.165012543 | 8.13E-05 | bP-21264C1.1  | -6.335504816 | 5.33E-06 |
| HLA-L          | 2.063913934 | 8.15E-05 | COL16A1       | -4.031738769 | 5.33E-06 |
| SIRPB1         | 4.675312778 | 8.27E-05 | LA16c-306E5.2 | -6.609989098 | 5.38E-06 |
| RP11-465B22.3  | 2.976147091 | 8.27E-05 | SDPR          | -7.580559368 | 5.40E-06 |
| ERO1B          | 2.100009409 | 8.28E-05 | MYCN          | -7.634149725 | 5.43E-06 |
| MYOSLID        | 6.251556237 | 8.30E-05 | RBM23         | -1.47130468  | 5.57E-06 |
| RP11-122G18.11 | 4.018316325 | 8.30E-05 | PAR6G         | -2.029138891 | 5.72E-06 |
| ACD            | 1.882616365 | 8.31E-05 | AC064875.2    | -8.268709306 | 5.72E-06 |
| OAF            | 2.390448949 | 8.33E-05 | SLC7A3        | -6.98685071  | 5.97E-06 |
| RP11-148O21.2  | 6.292163975 | 8.38E-05 | KANK1         | -3.055429556 | 6.04E-06 |
| RP11-818F20.5  | 5.837404855 | 8.44E-05 | LEPROTL1      | -2.38294778  | 6.16E-06 |
| APOL1          | 4.325237844 | 8.46E-05 | PLCB1         | -3.154386266 | 6.19E-06 |
| ECE2           | 2.428320432 | 8.58E-05 | ESRRG         | -7.840914344 | 6.19E-06 |
| DENND3         | 2.990357638 | 8.62E-05 | RP11-742D12.2 | -6.600456329 | 6.20E-06 |
| AC116609.3     | 6.271703909 | 8.65E-05 | ZNF835        | -7.47760205  | 6.31E-06 |
| TRIP10         | 1.657131428 | 8.73E-05 | ZKSCAN1       | -2.017420509 | 6.33E-06 |
| SMPDL3B        | 4.616445423 | 8.74E-05 | RND2          | -1.916048024 | 6.35E-06 |
| DUSP5          | 3.686129958 | 8.81E-05 | WSB1          | -2.327253738 | 6.35E-06 |
| TRIP13         | 1.600358181 | 8.90E-05 | RGL1          | -1.914148063 | 6.35E-06 |
| CES3           | 3.017303193 | 8.98E-05 | CCDC120       | -6.445042338 | 6.40E-06 |
| MAP2K3         | 1.320056939 | 9.04E-05 | BBOX1         | -7.257404167 | 6.45E-06 |
| KCNN1          | 3.188418263 | 9.20E-05 | MBTPS1        | -1.246984379 | 6.45E-06 |
| ZC3H15         | 1.607253748 | 9.21E-05 | ATP6V0E2-AS1  | -2.617283231 | 6.45E-06 |
| CDK7           | 1.328809493 | 9.44E-05 | CHST9         | -6.261634078 | 6.75E-06 |
| NTRK1          | 3.864659504 | 9.49E-05 | TGFB3         | -2.174138043 | 7.01E-06 |
| FAM111A        | 1.434909359 | 9.61E-05 | CDH6          | -8.393378183 | 7.06E-06 |
| SLCO1B1        | 6.200788044 | 9.65E-05 | CORO2B        | -4.079241563 | 7.06E-06 |
| KRT34          | 6.175123649 | 9.66E-05 | ADARB2        | -6.253261526 | 7.07E-06 |
| SNHG3          | 2.007679738 | 9.72E-05 | ZFAND5        | -1.333078315 | 7.09E-06 |
| RP11-336A10.5  | 6.036433974 | 9.75E-05 | LINCR-0001    | -3.583810268 | 7.15E-06 |
| TEKT4P2        | 1.652994433 | 9.76E-05 | LINC00909     | -1.795020664 | 7.52E-06 |
| GUCA1B         | 2.512679652 | 9.79E-05 | IFITM2        | -6.357688366 | 7.72E-06 |
| FDPS           | 1.682649589 | 9.81E-05 | AC073343.13   | -3.817835458 | 7.97E-06 |
| DNAJA2         | 1.254528871 | 9.83E-05 | LINC01224     | -6.942475864 | 8.32E-06 |
| SNTA1          | 1.855026372 | 9.83E-05 | RASA3         | -1.870986963 | 8.33E-06 |
| MTHFD2         | 1.611108297 | 1.01E-04 | ADAMTS3       | -2.702139134 | 8.33E-06 |
| MICALCL        | 5.09568983  | 1.01E-04 | ITM2C         | -2.910323702 | 8.35E-06 |
| ARRDC1         | 2.227428125 | 1.01E-04 | REV3L         | -1.769411596 | 8.46E-06 |
| RAB27B         | 4.233431928 | 1.02E-04 | COLEC12       | -6.264337315 | 8.51E-06 |
| PKD1L2         | 4.005502551 | 1.04E-04 | SON           | -1.19079563  | 8.55E-06 |
| RP11-445O3.3   | 5.996668    | 1.05E-04 | OPN3          | -1.743267409 | 8.70E-06 |
| SMCO2          | 2.552941153 | 1.05E-04 | ATP6V0E2      | -2.493339529 | 8.70E-06 |
| CMB9-22P13.1   | 4.696612941 | 1.06E-04 | PLD5          | -8.560230933 | 8.78E-06 |
| ALDH9A1        | 1.167266015 | 1.08E-04 | CD36          | -5.879239698 | 8.99E-06 |
| RP11-789C2.1   | 6.134136909 | 1.11E-04 | KANSL2        | -1.278645852 | 9.00E-06 |
| TMC6           | 2.137676287 | 1.11E-04 | RGS16         | -2.249077285 | 9.11E-06 |



|               |             |          |
|---------------|-------------|----------|
| C10orf11      | 3.201052494 | 1.11E-04 |
| RP11-77H9.2   | 2.414492258 | 1.11E-04 |
| ROBO4         | 5.253815395 | 1.12E-04 |
| CMTM4         | 1.509838385 | 1.13E-04 |
| GOLT1B        | 1.587493058 | 1.15E-04 |
| ARHGAP45      | 3.899697261 | 1.18E-04 |
| ARHGAP27      | 2.946301498 | 1.19E-04 |
| MND1          | 1.798401823 | 1.21E-04 |
| TMEM39A       | 1.114901907 | 1.23E-04 |
| RP11-126K1.2  | 2.955735961 | 1.24E-04 |
| FAM98C        | 1.451070818 | 1.25E-04 |
| GTF2H2B       | 1.695819244 | 1.28E-04 |
| RP11-61A14.1  | 5.6362257   | 1.28E-04 |
| TMEM200B      | 3.904905657 | 1.28E-04 |
| FKBP2         | 1.428743831 | 1.29E-04 |
| RP11-681B3.4  | 5.946072551 | 1.29E-04 |
| AGPAT2        | 2.30862541  | 1.30E-04 |
| TMEM40        | 6.63599404  | 1.30E-04 |
| LRRC2-AS1     | 6.032954976 | 1.31E-04 |
| AIP           | 2.098549984 | 1.33E-04 |
| TBC1D32       | 2.354456866 | 1.33E-04 |
| CREG1         | 1.511955171 | 1.39E-04 |
| PANX2         | 2.967373077 | 1.40E-04 |
| RFTN1         | 4.409310376 | 1.40E-04 |
| NBL1          | 3.393181516 | 1.41E-04 |
| MARS          | 1.386117466 | 1.41E-04 |
| AXDND1        | 3.490919951 | 1.43E-04 |
| ANXA11        | 1.540619085 | 1.44E-04 |
| CTC-281F24.3  | 3.96588506  | 1.46E-04 |
| LRRC2         | 4.249950974 | 1.49E-04 |
| STYK1         | 5.307218857 | 1.49E-04 |
| THG1L         | 1.125594406 | 1.52E-04 |
| TPK1          | 1.484219136 | 1.53E-04 |
| DEPTOR        | 3.926036101 | 1.53E-04 |
| RABGAP1L      | 1.686217785 | 1.55E-04 |
| TRIM25        | 1.290707489 | 1.56E-04 |
| UQCRCB        | 1.431678816 | 1.59E-04 |
| CTC-241N9.1   | 2.085569121 | 1.62E-04 |
| RP11-745L13.2 | 5.965543072 | 1.63E-04 |
| ADRA1B        | 6.001859259 | 1.63E-04 |
| EMBP1         | 4.881064498 | 1.65E-04 |
| EVA1A         | 4.734748264 | 1.65E-04 |
| SHANK2        | 5.327824646 | 1.65E-04 |
| EBAG9         | 1.489276633 | 1.65E-04 |
| LINC01238     | 1.855748333 | 1.66E-04 |
| NRTN          | 3.205906131 | 1.66E-04 |
| NMNAT3        | 2.730653499 | 1.66E-04 |
| UPK1A         | 4.837453706 | 1.67E-04 |
| LINC01293     | 5.944346668 | 1.67E-04 |
| STPG2         | 3.302883306 | 1.72E-04 |
| DNASE1L1      | 2.513631086 | 1.72E-04 |
| DDIT4         | 2.039723673 | 1.74E-04 |
| RP11-43A14.1  | 4.387826573 | 1.75E-04 |
| DNHD1         | 1.743757735 | 1.75E-04 |
| GFOD1         | 2.586068154 | 1.78E-04 |
| PRR5          | 3.722403025 | 1.79E-04 |
| MYOF          | 4.747732201 | 1.79E-04 |
| CAPN12        | 4.001323879 | 1.80E-04 |
| PLCB4         | 2.002095885 | 1.80E-04 |
| PIK3CD-AS2    | 2.914291017 | 1.81E-04 |
| OPTN          | 1.759683322 | 1.84E-04 |
| GRAMD1C       | 2.134171971 | 1.85E-04 |
| BCAS4         | 1.852960821 | 1.88E-04 |
| RP11-445F12.1 | 3.584080174 | 1.88E-04 |
| NAP1L1        | 1.336960592 | 1.89E-04 |
| TAF1D         | 1.84307435  | 1.90E-04 |
| CTD-2128A3.2  | 5.916777774 | 1.90E-04 |
| KIAA1522      | 1.414859377 | 1.93E-04 |

|               |              |          |
|---------------|--------------|----------|
| CCR1          | -7.206672765 | 9.14E-06 |
| RP5-981L23.7  | -6.696184964 | 9.14E-06 |
| RP11-834C11.4 | -6.194158157 | 9.19E-06 |
| MAML2         | -1.79195954  | 9.28E-06 |
| GLCCI1        | -2.205050697 | 9.29E-06 |
| STXBPSL       | -7.422078541 | 9.37E-06 |
| RALGAPA2      | -1.489220243 | 9.40E-06 |
| CAMK2B        | -5.991190257 | 9.40E-06 |
| NETO1         | -7.185569657 | 9.45E-06 |
| ALK           | -6.706011432 | 9.77E-06 |
| AFDN          | -1.359167603 | 9.79E-06 |
| RGCC          | -6.812449545 | 9.92E-06 |
| ARHGAP6       | -7.322137496 | 1.00E-05 |
| STYXL1        | -2.704520263 | 1.01E-05 |
| MTPN          | -1.360651814 | 1.02E-05 |
| GALNT5        | -6.678601559 | 1.03E-05 |
| ANO7          | -6.489876957 | 1.03E-05 |
| SH3KBP1       | -1.573217871 | 1.03E-05 |
| ABCB6         | -3.307001766 | 1.03E-05 |
| ASB16-AS1     | -1.933744054 | 1.04E-05 |
| WTAP          | -1.762099491 | 1.04E-05 |
| LUM           | -6.315667694 | 1.07E-05 |
| POGLUT1       | -1.533434776 | 1.10E-05 |
| KDM5B         | -2.455462867 | 1.10E-05 |
| USP32P1       | -7.126391356 | 1.11E-05 |
| SYNE2         | -2.479573527 | 1.14E-05 |
| HDLBP         | -1.473395602 | 1.15E-05 |
| AP1S2         | -2.574886233 | 1.17E-05 |
| ITIH6         | -6.56496578  | 1.17E-05 |
| IGDCC4        | -5.056808897 | 1.20E-05 |
| SCARB2        | -1.994238576 | 1.21E-05 |
| ZNF578        | -5.785074336 | 1.21E-05 |
| ACVR2A        | -1.850858818 | 1.23E-05 |
| RAB42         | -6.520326766 | 1.23E-05 |
| TXLNB         | -6.662405579 | 1.23E-05 |
| RCC1L         | -2.173430859 | 1.24E-05 |
| ATOH8         | -6.274964139 | 1.26E-05 |
| LSM5          | -1.225545572 | 1.26E-05 |
| SRGAP2        | -2.101690719 | 1.28E-05 |
| CENPU         | -1.734265274 | 1.29E-05 |
| DRAXIN        | -8.939502572 | 1.30E-05 |
| PSMA2         | -1.741675785 | 1.30E-05 |
| SGK2          | -6.779409355 | 1.32E-05 |
| PMS2P3        | -2.299633367 | 1.32E-05 |
| BPHL          | -1.510703854 | 1.33E-05 |
| CREB5         | -5.185225317 | 1.33E-05 |
| CITED1        | -4.037283125 | 1.35E-05 |
| CELSR2        | -1.989719953 | 1.36E-05 |
| SNHG18        | -4.647868931 | 1.37E-05 |
| NKAIN4        | -5.761509818 | 1.40E-05 |
| LDB1          | -1.190045783 | 1.40E-05 |
| TMEM35A       | -6.115730612 | 1.41E-05 |
| RP11-351J23.2 | -7.008216051 | 1.41E-05 |
| CCNT2-AS1     | -2.887192815 | 1.44E-05 |
| PROX1-AS1     | -6.483430831 | 1.45E-05 |
| PLIN3         | -3.321967585 | 1.49E-05 |
| COL5A3        | -5.341963106 | 1.51E-05 |
| VCAM1         | -6.092706226 | 1.52E-05 |
| WBSCR22       | -1.867522876 | 1.53E-05 |
| RENBP         | -5.059132296 | 1.53E-05 |
| ARHGAP19-SLI' | -5.336643306 | 1.54E-05 |
| WIPF1         | -1.877854311 | 1.55E-05 |
| WDR60         | -1.929350583 | 1.55E-05 |
| MZF1-AS1      | -4.109415081 | 1.56E-05 |
| U52111.14     | -5.209094491 | 1.56E-05 |
| CYP4F24P      | -7.661051506 | 1.56E-05 |
| VAV3          | -8.529394563 | 1.57E-05 |
| LINC01759     | -6.155727325 | 1.58E-05 |

|               |             |                 |
|---------------|-------------|-----------------|
| DLX2          | 2.865885537 | 1.93E-04        |
| MAP4K2        | 1.561770013 | 1.95E-04        |
| ACAT1         | 1.901181734 | 1.95E-04        |
| TRMT1L        | 1.3881325   | 1.96E-04        |
| SSSCA1        | 2.207044177 | 1.97E-04        |
| ANKRD18DP     | 3.798272606 | 1.97E-04        |
| TIGD7         | 1.261368628 | 2.00E-04        |
| RP11-115J23.1 | 3.59549855  | 2.00E-04        |
| AC058791.1    | 2.103776712 | 2.02E-04        |
| FAM19A3       | 3.17626306  | 2.02E-04        |
| TDRKH         | 1.509200106 | 2.04E-04        |
| SRPX          | 1.590762144 | 2.08E-04        |
| LINC00397     | 5.833030396 | 2.08E-04        |
| RP3-414A15.2  | 5.833030396 | 2.08E-04        |
| MCF2L2        | 2.689258539 | 0.0002088209552 |
| RP11-553A21.3 | 5.668675854 | 0.0002120600755 |
| CISH          | 2.757082702 | 0.0002139745216 |
| ANKRD13D      | 1.658325304 | 0.0002139745216 |
| P2RX5         | 3.68335431  | 0.0002161277632 |
| TBC1D2        | 2.378117517 | 0.000217989657  |
| COQ8A         | 1.766127002 | 0.0002205338588 |
| INTS3         | 1.059356499 | 0.0002221196089 |
| RPSAP52       | 4.192110637 | 0.0002231950541 |
| HRAT17        | 6.195418077 | 0.0002233493012 |
| CD163L1       | 4.532283777 | 0.0002241113478 |
| GRIN3B        | 5.205836495 | 0.0002242319126 |
| KIAA1551      | 1.587805706 | 0.0002265759245 |
| TRANK1        | 3.34275518  | 0.0002270264672 |
| RAD21-AS1     | 3.167226406 | 0.0002277363176 |
| RIDA          | 1.471036813 | 0.0002279195181 |
| ST8SIA6       | 4.701773242 | 0.0002284750564 |
| AC007879.2    | 4.331446467 | 0.0002325843762 |
| AC115522.3    | 4.767627014 | 0.0002331553758 |
| THAP1         | 1.160970462 | 0.0002344459672 |
| CANB3         | 1.889676045 | 0.0002359353223 |
| RAD51         | 1.432194582 | 0.0002378392159 |
| C8orf37       | 1.402812314 | 0.0002405864509 |
| CDS1          | 4.593883748 | 0.0002419520018 |
| SP6           | 3.239145168 | 0.0002441319584 |
| DHX38         | 1.461842975 | 0.0002464800835 |
| FOXP4-AS1     | 2.326531954 | 0.0002478962423 |
| HSP90AB1      | 1.643094068 | 0.0002505446139 |
| SGMS2         | 4.069633842 | 0.0002521425125 |
| RPTOR         | 1.680011242 | 0.0002543925844 |
| NME3          | 3.532225519 | 0.0002575574722 |
| FHOD1         | 1.938712913 | 0.0002614833863 |
| TRPC4         | 6.383015553 | 0.0002631858383 |
| KNDC1         | 4.666180877 | 0.0002632122149 |
| ACBD3         | 1.232549163 | 0.0002648191853 |
| ONECUT3       | 6.009196337 | 0.0002657434757 |
| LHX1          | 3.861006975 | 0.0002673204673 |
| KB-1980E6.3   | 3.412296271 | 0.0002681835125 |
| CENPL         | 1.275730176 | 0.0002735563401 |
| MTX1          | 1.439471995 | 0.0002755913006 |
| AP1S3         | 3.400879318 | 0.0002799911503 |
| PRKCG         | 4.282526901 | 0.0002803721307 |
| IMPA1         | 1.556668686 | 0.0002806190871 |
| SHISA2        | 6.44072761  | 0.0002837849483 |
| FAM210A       | 2.304700909 | 0.0002839375426 |
| SNX16         | 1.61366185  | 0.0002859528621 |
| MED8          | 1.564165631 | 0.0002870742793 |
| CAST          | 1.654880843 | 0.0002882611704 |
| CPNE3         | 1.493605788 | 0.0002888576008 |
| STX11         | 4.864614093 | 0.0002891687071 |
| C1orf204      | 3.41048722  | 0.000289401083  |
| SLC35E4       | 2.065000348 | 0.0002937047911 |
| C6orf99       | 5.335843395 | 0.000296850181  |
| NR4A3         | 2.45754144  | 0.0003046372206 |

|               |              |          |
|---------------|--------------|----------|
| LMTK2         | -1.254268351 | 1.58E-05 |
| PLA2G3        | -6.221722267 | 1.61E-05 |
| CABLES1       | -3.085311481 | 1.64E-05 |
| TRMT10B       | -2.12178456  | 1.66E-05 |
| APC2          | -3.469252438 | 1.69E-05 |
| CYP27A1       | -5.862314049 | 1.73E-05 |
| PPM1D         | -1.381414749 | 1.74E-05 |
| VTI1B         | -1.383130372 | 1.77E-05 |
| KLF15         | -2.49576687  | 1.77E-05 |
| RPS6KL1       | -7.440406124 | 1.78E-05 |
| RP11-268J15.5 | -3.199082895 | 1.80E-05 |
| SLAIN1        | -2.38790468  | 1.81E-05 |
| PSMA3-AS1     | -1.50008569  | 1.84E-05 |
| CDK5RAP2      | -1.249065616 | 1.84E-05 |
| SEL1L         | -1.643248111 | 1.84E-05 |
| GLIDR         | -2.364688409 | 1.86E-05 |
| DENND2A       | -3.682338511 | 1.86E-05 |
| GABRA4        | -7.578027863 | 1.88E-05 |
| C8orf31       | -6.714240074 | 1.88E-05 |
| TLCD2         | -4.302835096 | 1.94E-05 |
| RALA          | -1.610496687 | 1.95E-05 |
| SFXN5         | -2.49676208  | 1.95E-05 |
| ELMO2         | -1.264742299 | 1.97E-05 |
| PIK3C3        | -1.622590212 | 1.98E-05 |
| KDM2B         | -1.360665572 | 1.98E-05 |
| CLCN3P1       | -6.002472608 | 2.00E-05 |
| TCTA          | -2.179191107 | 2.00E-05 |
| PANK2         | -1.291076364 | 2.02E-05 |
| GABBR2        | -6.866019027 | 2.02E-05 |
| RP11-174J11.1 | -6.328840649 | 2.05E-05 |
| TSPAN3        | -2.151383699 | 2.06E-05 |
| ZSWIM7        | -1.5524246   | 2.08E-05 |
| TSTD2         | -1.70327186  | 2.14E-05 |
| NPNT          | -8.467447428 | 2.19E-05 |
| KIAA1841      | -1.605669308 | 2.24E-05 |
| SAP130        | -1.314017605 | 2.23E-05 |
| NDP           | -7.141590608 | 2.40E-05 |
| RP13-942N8.1  | -3.265656338 | 2.40E-05 |
| ZNF286A       | -1.547561835 | 2.41E-05 |
| PBX1          | -2.793970555 | 2.52E-05 |
| SH3PXD2B      | -1.896790533 | 2.52E-05 |
| VWCE          | -2.896423675 | 2.54E-05 |
| KCTD14        | -5.675366872 | 2.54E-05 |
| CH17-408M7.1  | -6.258366558 | 2.57E-05 |
| LOXL4         | -6.355158721 | 2.61E-05 |
| SLC15A2       | -3.58681522  | 2.61E-05 |
| UGGT2         | -1.504955429 | 2.64E-05 |
| APOLD1        | -4.099375945 | 2.66E-05 |
| MRPS33        | -1.373964755 | 2.72E-05 |
| MSRA          | -2.529747678 | 2.81E-05 |
| NAA60         | -1.877030786 | 2.83E-05 |
| GDPD2         | -7.437552248 | 2.83E-05 |
| SRPK3         | -6.234286216 | 2.83E-05 |
| TP53RK        | -1.298426852 | 2.84E-05 |
| XXYL1         | -2.230129922 | 2.87E-05 |
| SYNPO2L       | -5.332730031 | 2.88E-05 |
| LAMP1         | -1.844623723 | 2.90E-05 |
| TMEM178A      | -4.806759992 | 2.90E-05 |
| TNFRSF1B      | -2.657970399 | 2.94E-05 |
| SUSD1         | -3.382783751 | 2.94E-05 |
| CNDP2         | -1.794495006 | 2.95E-05 |
| COMMD2        | -1.22822191  | 2.97E-05 |
| DBNL          | -1.952715567 | 3.04E-05 |
| KLF12         | -1.65512703  | 3.05E-05 |
| TRIB2         | -4.958139284 | 3.05E-05 |
| PTPRN2        | -6.161037669 | 3.06E-05 |
| SYNJ1         | -1.590950773 | 3.08E-05 |
| APPBP2        | -1.383694247 | 3.08E-05 |

|               |             |                 |                |              |          |
|---------------|-------------|-----------------|----------------|--------------|----------|
| IL11          | 3.632908975 | 0.0003060368088 | TRAF3IP2-AS1   | -1.702715019 | 3.10E-05 |
| FAM157A       | 2.268478236 | 0.0003174286696 | CREBBP         | -1.347635202 | 3.11E-05 |
| CDK2AP2       | 2.25631826  | 0.0003179336575 | RP11-120J1.1   | -3.974457425 | 3.13E-05 |
| KREMEN2       | 3.44683736  | 0.0003180906123 | RBMS3          | -2.084815207 | 3.15E-05 |
| TWIST1        | 2.072764073 | 0.00031877083   | AC004980.7     | -1.951479398 | 3.15E-05 |
| NUDCD1        | 1.445088151 | 0.0003197934527 | PELI1          | -2.894373961 | 3.16E-05 |
| EMC2          | 1.441392204 | 0.0003226318849 | C11orf87       | -7.467912664 | 3.24E-05 |
| LPCAT4        | 1.318391558 | 0.0003256612307 | LPAR4          | -4.813612636 | 3.33E-05 |
| RP4-660H19.1  | 5.734910136 | 0.0003298900161 | APAF1          | -1.567964156 | 3.34E-05 |
| RP11-93B14.4  | 5.670451112 | 0.0003303264004 | BTG2           | -2.695127505 | 3.38E-05 |
| BMI1          | 1.097282306 | 0.0003325018199 | C2orf80        | -6.820461667 | 3.39E-05 |
| SLC30A3       | 2.985670228 | 0.0003348502855 | NHSL1          | -1.657548669 | 3.47E-05 |
| METTL18       | 1.478235135 | 0.0003348583015 | KCNC1          | -5.274886501 | 3.49E-05 |
| TMCO4         | 2.188888771 | 0.0003360913493 | FAM66C         | -1.945290987 | 3.52E-05 |
| ZNF32-AS2     | 3.544314316 | 0.0003360913493 | TBC1D7         | -1.645422456 | 3.55E-05 |
| SH3BGRL2      | 3.173192198 | 0.0003364128856 | RHOU           | -3.186389645 | 3.57E-05 |
| AC017101.10   | 5.833569888 | 0.0003380045622 | APOM           | -2.442445538 | 3.57E-05 |
| POLR3H        | 1.702608562 | 0.0003383808089 | L1CAM          | -2.681938808 | 3.61E-05 |
| FAM83B        | 5.92848296  | 0.0003413396104 | CCDC13         | -3.711319491 | 3.72E-05 |
| CYP11A1       | 5.812518334 | 0.0003422847813 | RP5-894A10.2   | -2.171188768 | 3.73E-05 |
| CROCCP2       | 1.589934001 | 0.0003473772004 | LMBR1          | -1.907251373 | 3.80E-05 |
| MRPL41        | 2.199824598 | 0.0003509099361 | ZNF793-AS1     | -6.754784127 | 3.80E-05 |
| AC006369.2    | 5.86520115  | 0.000353289208  | RAB7B          | -3.086765115 | 3.82E-05 |
| RP11-289F5.1  | 4.967720654 | 0.0003563823617 | ZNF786         | -1.723777774 | 3.84E-05 |
| CTC-378H22.2  | 5.863256032 | 0.0003609088144 | SLC7A8         | -4.41206003  | 3.86E-05 |
| ZFP36         | 2.259034882 | 0.0003661364537 | VPS45          | -1.411453451 | 3.86E-05 |
| FAM72C        | 2.873088917 | 0.0003737272994 | SRSF6          | -1.135706591 | 3.91E-05 |
| SNX9          | 1.165885814 | 0.0003748318134 | KAT2B          | -2.244531308 | 3.96E-05 |
| TSGA10IP      | 5.724587022 | 0.0003767621378 | MAN1C1         | -3.530480386 | 4.04E-05 |
| TAF7          | 1.256122997 | 0.0003800456543 | RP11-1263C18.1 | -7.313387613 | 4.16E-05 |
| DCAF13        | 1.401547357 | 0.0003863106457 | SULT1A1        | -5.492318495 | 4.17E-05 |
| TNFRSF11A     | 3.925731058 | 0.0003954832737 | BST2           | -6.441679716 | 4.21E-05 |
| APOBEC3D      | 5.28173632  | 0.0003990469086 | CTD-2049O4.1   | -7.321369781 | 4.22E-05 |
| SLC13A3       | 1.318403408 | 0.0004008600538 | PLOD3          | -1.681723964 | 4.25E-05 |
| GHITM         | 1.264366628 | 0.0004019056312 | MPPED2         | -7.737450791 | 4.31E-05 |
| LYPLA1        | 1.412389414 | 0.0004055566677 | CCNT2          | -1.499508598 | 4.38E-05 |
| SLC17A7       | 3.188159766 | 0.0004118426117 | AC004540.4     | -6.282644251 | 4.39E-05 |
| RFESD         | 1.780747034 | 0.0004129507907 | SHISA7         | -4.836924153 | 4.41E-05 |
| EIF2S2        | 1.497174808 | 0.0004143754969 | NAA40          | -1.315186546 | 4.50E-05 |
| MSLN          | 5.79488103  | 0.0004158964924 | ENKUR          | -4.544953997 | 4.50E-05 |
| GRPEL2        | 1.136061341 | 0.0004190176426 | SFPQ           | -1.301935116 | 4.51E-05 |
| SIRT7         | 1.280458303 | 0.000419290467  | NOTCH4         | -3.352951333 | 4.57E-05 |
| RP11-195F19.9 | 4.469005451 | 0.0004238631088 | SPPL3          | -1.578143627 | 4.71E-05 |
| ABCA5         | 3.479459943 | 0.0004258580416 | GPR107         | -1.730129255 | 4.79E-05 |
| AHNAK         | 3.86555057  | 0.0004269202114 | YBX2           | -4.076146014 | 4.80E-05 |
| CACNA2D2      | 3.657926708 | 0.0004271538083 | DRD2           | -7.214940803 | 4.98E-05 |
| DNPH1         | 1.904916479 | 0.0004316625232 | PXMP2          | -2.741124337 | 4.98E-05 |
| FKBP5         | 1.443127729 | 0.0004372348403 | PDZD2          | -5.08230256  | 5.00E-05 |
| CDIPT-AS1     | 3.803998997 | 0.0004372348403 | EZH2           | -1.393782233 | 5.05E-05 |
| CENPA         | 1.254057718 | 0.0004419414531 | PCDHA10        | -4.574259996 | 5.05E-05 |
| AC009502.4    | 5.730004875 | 0.0004430834675 | AC009120.6     | -1.504138068 | 5.08E-05 |
| RP11-783K16.1 | 2.343228486 | 0.000449774211  | PRRT4          | -4.437228743 | 5.08E-05 |
| TMEM123       | 1.481262415 | 0.0004498855903 | NSUN5P2        | -2.058475023 | 5.14E-05 |
| OLMALINC      | 1.752506758 | 0.0004498855903 | ARL17A         | -2.634782824 | 5.21E-05 |
| TUBE1         | 1.582715801 | 0.0004520677542 | IFRD1          | -1.452438355 | 5.21E-05 |
| ADAM11        | 2.858991538 | 0.0004525825731 | CNP            | -2.810932937 | 5.25E-05 |
| RGS4          | 3.91157089  | 0.0004567081725 | CCDC144CP      | -2.84803853  | 5.28E-05 |
| COG1          | 1.11675938  | 0.0004570488584 | CACFD1         | -2.355884735 | 5.32E-05 |
| IRF6          | 6.176392219 | 0.0004583536955 | RARB           | -6.197173452 | 5.54E-05 |
| COPS5         | 1.325793217 | 0.0004588084407 | ATP6V1G2       | -2.12424706  | 5.58E-05 |
| RP11-146F11.5 | 3.46808574  | 0.0004612645846 | TMEM181        | -1.224017819 | 5.80E-05 |
| KIAA1429      | 1.24880511  | 0.000462955549  | SLC19A3        | -1.834850488 | 5.93E-05 |
| SPATS2        | 1.474620984 | 0.0004632507756 | ADAT1          | -1.502652197 | 6.01E-05 |
| GLTSCR2       | 1.999321341 | 0.0004641758216 | SLC26A4-AS1    | -5.453726901 | 6.07E-05 |
| IMPA2         | 1.554706474 | 0.0004666207193 | HEY2           | -4.414289421 | 6.08E-05 |
| BOLA3         | 1.518398992 | 0.0004728041371 | CHURC1         | -1.999784717 | 6.11E-05 |
| KIF20B        | 1.703329965 | 0.0004755326231 | TLX1           | -6.950689331 | 6.15E-05 |
| BEND6         | 2.07869001  | 0.0004886709483 | METTL2B        | -1.168119304 | 6.18E-05 |

|                |             |                 |               |              |                 |
|----------------|-------------|-----------------|---------------|--------------|-----------------|
| PNPLA6         | 1.908810733 | 0.0004961947864 | TFAP2A-AS1    | -2.578756204 | 6.18E-05        |
| CMTM8          | 1.566319755 | 0.0004977234145 | NOTCH1        | -2.38416656  | 6.32E-05        |
| KRTAP4-8       | 6.443207316 | 0.0004977485223 | N6AMT1        | -1.464241785 | 6.41E-05        |
| ULK4           | 1.312172531 | 0.0004999601834 | PTPRJ         | -2.995008524 | 6.50E-05        |
| ABCC10         | 1.102596042 | 0.0005019276307 | S1PR2         | -2.131228152 | 6.59E-05        |
| DUSP11         | 1.167737455 | 0.000506676372  | RP11-582J16.4 | -4.940195472 | 6.60E-05        |
| LINC01291      | 5.777375091 | 0.0005150146816 | PRKAB1        | -1.386382525 | 6.65E-05        |
| RPS6KA6        | 4.176362664 | 0.0005179845633 | FAAH          | -3.063708142 | 6.66E-05        |
| NARFL          | 1.394658197 | 0.0005220812319 | ZP3           | -4.245213998 | 6.70E-05        |
| TJP3           | 4.995679468 | 0.0005221144978 | ERV3-1        | -2.923616752 | 6.71E-05        |
| TRIQK          | 1.513918681 | 0.0005225205458 | MTSS1         | -2.902033457 | 6.74E-05        |
| SYT7           | 3.220055066 | 0.0005225750323 | NHLRC3        | -1.972023136 | 6.78E-05        |
| SHANK1         | 4.034790192 | 0.0005341234804 | RP11-625L16.1 | -6.239954724 | 6.85E-05        |
| HMGCS1         | 1.801653223 | 0.0005392205274 | CCDC188       | -6.771855543 | 6.86E-05        |
| TKFC           | 1.504730346 | 0.0005411830668 | CDS2          | -1.517824367 | 6.97E-05        |
| FAM3D          | 5.651387957 | 0.0005411830668 | EGF           | -5.910481677 | 7.11E-05        |
| A2M-AS1        | 4.168786915 | 0.0005431319448 | LRRC37A       | -4.076792221 | 7.24E-05        |
| FAM72A         | 1.52670555  | 0.0005460427912 | TET2          | -1.726384486 | 7.26E-05        |
| RP11-1149O23.4 | 5.650212647 | 0.0005514826019 | PIAS2         | -1.903096706 | 7.28E-05        |
| BTBD1          | 1.164110292 | 0.0005561650065 | RCOR3         | -1.339422034 | 7.59E-05        |
| ALDH1L2        | 1.822030814 | 0.0005673223049 | TRPC3         | -1.952000887 | 7.69E-05        |
| GRAMD1B        | 4.141690663 | 0.0005700008455 | TSHZ1         | -1.843380294 | 7.79E-05        |
| EEF1A2         | 2.505721147 | 0.0005703344178 | TPGS2         | -1.401330585 | 7.91E-05        |
| BAIAP3         | 2.92378439  | 0.0005741814719 | ZMYM2         | -1.450774501 | 7.91E-05        |
| CCDC110        | 2.663756586 | 0.0005794115432 | DIRC3         | -6.029398735 | 8.08E-05        |
| INTS4          | 1.03261393  | 0.0005889573993 | PIK3AP1       | -6.231266927 | 8.13E-05        |
| TTC9C          | 1.040712325 | 0.0005901527529 | ZNF681        | -4.664779331 | 8.20E-05        |
| APOBEC3B       | 1.462245881 | 0.0005912597489 | BCL9          | -1.522688419 | 8.23E-05        |
| RP11-1038A11.3 | 5.598300563 | 0.0005962509155 | C1R           | -4.054879308 | 8.35E-05        |
| HEBP1          | 1.097962078 | 0.0006017518789 | TEKT2         | -6.281671406 | 8.36E-05        |
| CRABP2         | 3.371708802 | 0.0006024485267 | UBN2          | -1.42492328  | 8.42E-05        |
| ZNF550         | 1.569937387 | 0.0006024485267 | PHKG1         | -3.559632841 | 8.42E-05        |
| ODF3B          | 5.538985642 | 0.0006087419115 | POMT2         | -1.693584754 | 8.68E-05        |
| LINC01611      | 5.665276992 | 0.0006123094382 | RP11-1114A5.4 | -2.634229881 | 8.80E-05        |
| CYYR1-AS1      | 5.796277869 | 0.0006165715929 | PCDH18        | -2.946862256 | 8.89E-05        |
| C4orf22        | 5.639824024 | 0.0006184386534 | SLC24A2       | -4.93774687  | 8.93E-05        |
| SEMA6B         | 2.99833995  | 0.0006242887352 | KLF3-AS1      | -4.575331248 | 9.04E-05        |
| TIPARP-AS1     | 1.715318172 | 0.0006259775515 | LINC00326     | -6.314611164 | 9.07E-05        |
| TOMM34         | 1.484771827 | 0.0006277886936 | LGI3          | -5.896132289 | 9.07E-05        |
| MC1R           | 1.600320028 | 0.0006305477162 | ARHGAP15      | -6.128386239 | 9.19E-05        |
| LINC01011      | 1.594381048 | 0.0006314346565 | CDK14         | -2.799083317 | 9.22E-05        |
| RGS9           | 1.629533345 | 0.0006322646672 | TMEM221       | -7.015319196 | 9.22E-05        |
| POLR1C         | 1.532565206 | 0.0006361256789 | LINC00664     | -7.036373964 | 9.29E-05        |
| CFAP58-AS1     | 5.230445092 | 0.0006387733307 | LRIG1         | -2.651161315 | 9.30E-05        |
| XXYac-YX65C7_  | 3.152361148 | 0.0006402732459 | CYP24A1       | -6.52652621  | 9.39E-05        |
| AP001596.6     | 3.794530851 | 0.000642315236  | MED4          | -1.051860378 | 9.42E-05        |
| MRPL15         | 1.303477517 | 0.0006428825236 | CCNE2         | -2.351715611 | 9.60E-05        |
| NFKBID         | 1.919576001 | 0.0006428825236 | CPT1C         | -1.802348229 | 9.70E-05        |
| HLA-DRB1       | 5.738595578 | 0.0006457898972 | TBC1D13       | -2.139992088 | 9.72E-05        |
| TBC1D3P1       | 5.291093929 | 0.000647412725  | ACADL         | -6.34097609  | 9.79E-05        |
| RP1-46F2.3     | 5.65892083  | 0.0006545522028 | CABYR         | -5.855067283 | 9.87E-05        |
| CTD-2020K17.1  | 3.574560661 | 0.0006555385044 | ZNF397        | -1.473815447 | 9.91E-05        |
| C19orf24       | 2.110828977 | 0.0006593560176 | MDH2          | -1.625473508 | 0.0001007438938 |
| CTD-2035E11.3  | 2.266749235 | 0.0006709769816 | CIPC          | -1.381691935 | 0.0001016672288 |
| TFB1M          | 1.790036923 | 0.0006723643113 | ZNF195        | -1.767649668 | 0.0001017868071 |
| AP1AR          | 1.737939287 | 0.0006747747283 | RP5-942I16.1  | -6.014181696 | 0.0001022728821 |
| HDDC3          | 1.759334291 | 0.0006815891691 | LSMEM1        | -1.933097674 | 0.0001035192066 |
| DHCR7          | 2.046923772 | 0.0006851095909 | RP11-1191J2.2 | -6.395026286 | 0.000105034038  |
| CHCHD7         | 1.778174469 | 0.0006962552906 | RP2           | -1.494590892 | 0.0001097058338 |
| CCNG1          | 1.5095986   | 0.0007141528471 | PLGLB1        | -6.174394792 | 0.0001098830558 |
| CTD-3162L10.1  | 3.682695686 | 0.0007170087374 | FGF11         | -4.064848348 | 0.000110963311  |
| ALDH1L1        | 3.991164527 | 0.0007254732201 | PLCD4         | -4.835138045 | 0.0001127538413 |
| ADORA2B        | 2.014181587 | 0.0007315146553 | MEF2C         | -2.528773143 | 0.000113082075  |
| VSIR           | 3.796135419 | 0.0007328115695 | BCL6          | -3.223438576 | 0.0001146074646 |
| SCN8A          | 2.419899739 | 0.0007407571256 | AC108025.2    | -6.017357396 | 0.0001211827081 |
| SP5            | 4.554661859 | 0.0007536343928 | ZNF326        | -1.548570916 | 0.0001216444844 |
| EPHX4          | 2.926726861 | 0.0007537808265 | COL24A1       | -5.802589958 | 0.0001217649257 |
| FAM182B        | 2.503938656 | 0.0007599373597 | GUCY1A2       | -3.926729462 | 0.000126960291  |

|                |             |                 |               |              |                 |
|----------------|-------------|-----------------|---------------|--------------|-----------------|
| SLC10A3        | 1.800831718 | 0.0007610381976 | BRINP2        | -7.485391959 | 0.0001280409123 |
| MRPL39         | 1.038188436 | 0.000767811906  | LINC01571     | -6.934581678 | 0.0001285817886 |
| LINC01385      | 5.213778355 | 0.0007681225893 | TNR           | -6.04713422  | 0.0001303132065 |
| KLC4           | 1.596923805 | 0.00077108709   | RUFY3         | -2.021686763 | 0.0001331939762 |
| LINC00887      | 4.768162992 | 0.0007718938547 | CTD-2380F24.1 | -5.961929438 | 0.000133566291  |
| CTC-296K1.4    | 3.998608616 | 0.0007742883328 | SEPT7P2       | -1.5492593   | 0.0001381117189 |
| VDAC3          | 1.190327297 | 0.0007761568429 | DBI           | -1.932590626 | 0.0001413593038 |
| WT1            | 3.054803397 | 0.0007794766914 | STK36         | -1.786876929 | 0.0001429509668 |
| ATF1           | 1.260589816 | 0.0007796596635 | CPNE5         | -4.985076934 | 0.0001435921825 |
| SERPINE1       | 4.000771324 | 0.0007828209038 | DCUN1D2       | -1.610155966 | 0.0001436026314 |
| PTBP3          | 1.157095553 | 0.0007908280334 | P2RX6         | -3.114256558 | 0.0001437275736 |
| SH3TC1         | 3.332567684 | 0.0007908280334 | CROT          | -1.498122017 | 0.0001447607742 |
| MRPL14         | 1.632865686 | 0.0007918457095 | HAS2-AS1      | -4.085607506 | 0.000145027447  |
| AFG3L2         | 1.335459631 | 0.0007931669319 | LINC00844     | -6.506214183 | 0.0001455942328 |
| QPCTL          | 1.613619578 | 0.0007952536066 | USP6NL        | -2.094789533 | 0.0001476601159 |
| CENPQ          | 1.289494425 | 0.0007956586358 | SLC6A1        | -6.291388637 | 0.0001492338217 |
| IGFBP6         | 3.173399727 | 0.000800734132  | IGFBPL1       | -6.916218781 | 0.0001494838741 |
| WNT9A          | 2.56043785  | 0.0008139272622 | ZNF665        | -4.534523102 | 0.0001497526294 |
| RP11-255I10.2  | 5.566707451 | 0.0008192694951 | CPEB2         | -2.183944531 | 0.0001499956786 |
| MMP1           | 5.633896566 | 0.0008244235812 | CASK          | -1.218153687 | 0.0001505001211 |
| ERC2           | 3.784584233 | 0.0008292004769 | EFHB          | -3.885577778 | 0.0001505001211 |
| RP11-288C17.1  | 3.627892416 | 0.0008293602346 | TET3          | -1.227875609 | 0.0001534002706 |
| ZFP64          | 1.346982885 | 0.0008300294422 | AGAP9         | -2.033008178 | 0.0001537526836 |
| RP11-756A22.7  | 2.907268163 | 0.0008300294422 | ATP5S         | -1.128715878 | 0.000153854396  |
| ERO1A          | 1.418742592 | 0.0008327648629 | RP11-75C10.7  | -6.823811427 | 0.000155208407  |
| KCNQ1          | 4.077196153 | 0.0008396977699 | MN1           | -4.443220461 | 0.0001558878363 |
| SERTAD4-AS1    | 4.408977222 | 0.0008421646925 | LINC00908     | -6.481107341 | 0.0001560257212 |
| GINM1          | 1.248458477 | 0.0008472979903 | KCNH8         | -6.433689519 | 0.0001566449822 |
| KIF12          | 4.465577191 | 0.0008712928593 | VPS26B        | -1.518328242 | 0.0001570580839 |
| ICAM3          | 3.65704382  | 0.0008724535267 | ADGRL3        | -2.625659858 | 0.0001581451265 |
| CCDC114        | 2.64997732  | 0.0008784063149 | CKB           | -2.672190752 | 0.000162358273  |
| CHORDC1        | 1.807189398 | 0.0008981652702 | NKIRAS2       | -1.596413971 | 0.0001624482971 |
| NVL            | 1.127588771 | 0.0009049303891 | TP53INP1      | -1.653609753 | 0.0001654590983 |
| ASH1L-AS1      | 1.385697423 | 0.0009050364661 | DCTN5         | -1.055875566 | 0.0001655936404 |
| USP32P2        | 3.895944784 | 0.0009065648927 | SETD4         | -1.309390555 | 0.0001660571308 |
| RPS27          | 1.340957822 | 0.0009072209424 | GATSL2        | -2.222107936 | 0.0001667032109 |
| AMIGO2         | 3.23171473  | 0.0009230832358 | DNAJC28       | -1.930911085 | 0.0001672499089 |
| ELL            | 1.648829891 | 0.0009297164672 | SH3BGR        | -1.595741591 | 0.0001689731608 |
| PMFBP1         | 3.089186111 | 0.0009411070239 | PTBP2         | -1.71189802  | 0.0001693405314 |
| LINC01763      | 5.073877759 | 0.0009411342309 | ANTXR1        | -2.029216227 | 0.00016971677   |
| FAM86C2P       | 1.718322423 | 0.0009413369038 | LUC7L         | -1.204263891 | 0.0001700296867 |
| SPINT2         | 5.145401442 | 0.0009486656075 | THRA          | -1.577056733 | 0.0001700296867 |
| DMBT1          | 4.86532157  | 0.0009512461699 | FBLN7         | -2.776087263 | 0.0001700296867 |
| CA3            | 2.793056217 | 0.0009560913198 | ARC           | -4.32165699  | 0.0001700296867 |
| HOMER2         | 2.272314876 | 0.0009628237861 | SH3D21        | -2.287195531 | 0.0001700296867 |
| HMG20B         | 1.561510133 | 0.0009635275437 | RARRES1       | -6.300998123 | 0.0001720297713 |
| ZFPL1          | 1.636337777 | 0.0009682942101 | HSDL1         | -1.271066674 | 0.0001741519536 |
| NFS1           | 1.197655844 | 0.000968524647  | SCN2A         | -5.720489701 | 0.0001741935815 |
| VPS51          | 1.870147358 | 0.000976192413  | RP11-13A1.1   | -5.656338899 | 0.0001779992895 |
| RP11-1094H24.4 | 3.435986713 | 0.000978736911  | TBX21         | -5.887691991 | 0.0001783490544 |
| PCDHGA6        | 1.536393755 | 0.0009884439744 | LMO1          | -5.950475905 | 0.0001783490544 |
| RP11-399K21.14 | 3.580469233 | 0.0009919611781 | HOXD-AS2      | -5.941264646 | 0.0001805001733 |
| LYN            | 2.426066615 | 0.0009969719692 | ZC3H14        | -1.091280277 | 0.0001805689676 |
| OCLN           | 2.151543405 | 0.001010326866  | EML1          | -2.320998196 | 0.0001829236705 |
| SLC7A7         | 3.608463611 | 0.001013418859  | SGCB          | -2.150964053 | 0.0001837833549 |
| EXPH5          | 3.583238705 | 0.001020974983  | RP11-498P14.3 | -2.986561638 | 0.0001840136747 |
| CAMSAP3        | 3.450092755 | 0.001025413497  | CPT2          | -1.274499213 | 0.0001844144916 |
| AMOT           | 1.330270957 | 0.001026221568  | SLC43A2       | -2.551602162 | 0.0001846792081 |
| TSPAN19        | 5.293806069 | 0.001028420529  | KIAA0825      | -2.649464357 | 0.000184905333  |
| HSPA2          | 2.78288696  | 0.001032441753  | LINC00977     | -6.219898602 | 0.0001857006558 |
| GALK1          | 2.036385407 | 0.001052722926  | ABHD3         | -1.355213982 | 0.0001874053284 |
| RP11-337C18.8  | 1.595992218 | 0.001058565184  | C9orf78       | -1.167024087 | 0.0001896006876 |
| RP5-1071N3.1   | 3.232444987 | 0.001062444777  | TTC3          | -1.411619257 | 0.000190155777  |
| RP11-1C8.4     | 5.648537776 | 0.001063952771  | CLEC2D        | -1.568440398 | 0.0001917764615 |
| PRICKLE3       | 1.544015044 | 0.001073125705  | STAR7         | -1.282435027 | 0.0001925264545 |
| NEU3           | 1.881210749 | 0.001073452665  | SCG3          | -6.18740641  | 0.0001934401174 |
| HERC6          | 1.668345692 | 0.001076415138  | LRRC34        | -6.126019086 | 0.0001934924996 |
| COL18A1        | 2.550279121 | 0.001091350925  | AGMAT         | -6.047277268 | 0.0001945278792 |

|               |             |                |
|---------------|-------------|----------------|
| YIPF2         | 1.920728219 | 0.00110347967  |
| TMEM107       | 1.387412532 | 0.00110347967  |
| GOLGA2P5      | 2.611589384 | 0.00110347967  |
| AARS2         | 1.236828906 | 0.001104496593 |
| EMSY          | 1.149535574 | 0.001106280874 |
| ULBP2         | 1.906203493 | 0.001114037869 |
| AP5B1         | 1.572753811 | 0.001118883462 |
| CNGA1         | 4.085622422 | 0.001121380329 |
| RP11-585P4.5  | 2.303163707 | 0.001122770321 |
| RP11-379B18.5 | 3.018498083 | 0.001126284887 |
| SRD5A3        | 2.072714019 | 0.001129209441 |
| MYBL1         | 1.582278739 | 0.00113156829  |
| RP11-192H23.4 | 1.642989186 | 0.001131674007 |
| LRR3-AS1      | 5.440915985 | 0.001134270019 |
| RP11-320G24.1 | 5.44144726  | 0.001135271104 |
| PRX           | 2.644822701 | 0.00113863024  |
| ZNF600        | 3.226472752 | 0.001142282318 |
| COL4A3        | 3.498714231 | 0.001150444182 |
| LINC01096     | 2.569687218 | 0.001152849704 |
| FAM155A       | 4.173376415 | 0.001157937365 |
| MTX1P1        | 1.849713279 | 0.001179256358 |
| MVD           | 1.930819022 | 0.001183642154 |
| RP11-666A8.8  | 2.71470148  | 0.001185413762 |
| PAGR1         | 2.054124732 | 0.00119263882  |
| WDR36         | 1.412308003 | 0.001200896585 |
| RP11-377G16.2 | 5.05269672  | 0.001208141242 |
| LBHD1         | 2.095812149 | 0.001214530668 |
| ZNF699        | 1.418449388 | 0.001218901552 |
| FDX1          | 1.238674322 | 0.001223941869 |
| CUL7          | 3.804967793 | 0.001226173149 |
| LHX4          | 3.122548295 | 0.001238668146 |
| RP11-397A16.1 | 5.144165161 | 0.001252642336 |
| CCDC144B      | 2.487217816 | 0.001260722306 |
| MTUS2-AS1     | 4.327983052 | 0.00126518416  |
| RP11-6D1.3    | 5.100909506 | 0.001274578173 |
| RNLS          | 3.679139786 | 0.001294940526 |
| ALPK1         | 2.727274259 | 0.001304598993 |
| GCLC          | 1.755625482 | 0.001306281919 |
| PCBP3-OT1     | 4.988139472 | 0.001306281919 |
| ICA1          | 1.844884327 | 0.001320099891 |
| AC007319.1    | 3.659058233 | 0.001320099891 |
| VIM-AS1       | 1.900326091 | 0.001325357573 |
| SMC1B         | 3.540512488 | 0.001345851591 |
| RAB11FIP5     | 1.509011443 | 0.001345851591 |
| HLA-E         | 1.805837696 | 0.001356580259 |
| RIN2          | 1.964168698 | 0.00137101705  |
| CTSL          | 2.568745398 | 0.001372251799 |
| AMPD2         | 2.127534674 | 0.001378832489 |
| CCNY          | 1.011801848 | 0.001382140891 |
| LINC01137     | 3.235447082 | 0.001389626545 |
| CASC10        | 1.933984767 | 0.001406626481 |
| EIF2A         | 1.213278665 | 0.001411032512 |
| KLHL17        | 1.912875085 | 0.001411819751 |
| TMEM255B      | 3.626085184 | 0.001426567056 |
| CDIPT         | 1.777987381 | 0.001438414948 |
| AC023590.1    | 5.440417548 | 0.001449039108 |
| HAX1          | 1.389235591 | 0.001449173312 |
| CEP70         | 1.735715871 | 0.001458130752 |
| H2AFY2        | 4.677174439 | 0.001461532812 |
| NDUFA2        | 1.439361836 | 0.001475587716 |
| FRG1BP        | 2.113799438 | 0.001486390724 |
| DTX4          | 2.332344206 | 0.001490834852 |
| WHAMMP3       | 2.426614058 | 0.001517472151 |
| PRSS12        | 3.633101179 | 0.001525613517 |
| ING2          | 1.244314259 | 0.001535089415 |
| CKS1B         | 1.324403927 | 0.001536760082 |
| CCDC124       | 1.570229529 | 0.001536836703 |
| IVNS1ABP      | 1.034562602 | 0.001537452728 |

|               |              |                 |
|---------------|--------------|-----------------|
| SMN2          | -4.577968467 | 0.0001945506733 |
| FAM133B       | -1.323088203 | 0.0001946648009 |
| SLC25A25-AS1  | -1.773493332 | 0.0001957125507 |
| NAV2          | -2.839371546 | 0.0001964197515 |
| ZNF271P       | -1.387987967 | 0.0002018118616 |
| UBE2H         | -1.906977693 | 0.0002022208292 |
| TP53I11       | -2.521432255 | 0.0002028835075 |
| PTCHD1        | -6.294287283 | 0.0002039367622 |
| RCOR1         | -1.366311799 | 0.0002045846559 |
| ABCD4         | -1.49262165  | 0.0002056537894 |
| ZNF285        | -2.808015336 | 0.0002067254787 |
| ACTB          | -1.628190211 | 0.0002077109847 |
| MEGF8         | -2.3015151   | 0.0002139745216 |
| ZFP90         | -1.284863431 | 0.0002158593367 |
| RP11-506M12.1 | -2.336284409 | 0.0002171325614 |
| RP11-231C18.1 | -6.020036331 | 0.0002193220442 |
| LRR3C8D       | -2.426915263 | 0.0002198754306 |
| SPRY2         | -3.438008128 | 0.0002237498053 |
| SMARCD3       | -2.294120396 | 0.0002241421563 |
| HIPK2         | -2.503557211 | 0.0002263414467 |
| AC073283.4    | -5.977321528 | 0.0002270424433 |
| EPB41L3       | -5.72283328  | 0.0002273300317 |
| ZNF491        | -2.385051145 | 0.0002279195181 |
| ZMYM3         | -1.154269972 | 0.0002302847214 |
| PPP1R3C       | -2.640964527 | 0.0002305850606 |
| CDH4          | -5.057197909 | 0.0002307041976 |
| CTD-2003C8.2  | -5.594257181 | 0.0002325843762 |
| SMAD3         | -1.439773094 | 0.0002334668178 |
| DAG1          | -1.728892896 | 0.0002334668178 |
| ELF1          | -1.565520375 | 0.0002336127853 |
| C11orf95      | -1.507457449 | 0.0002376789918 |
| ABCC6         | -4.629763366 | 0.0002383591646 |
| PROM2         | -4.210973149 | 0.0002385283845 |
| ITPR1PL1      | -1.43474733  | 0.0002397119019 |
| ZNF107        | -1.593153479 | 0.0002398397476 |
| ORAI2         | -2.68372196  | 0.0002400735245 |
| CRIP2         | -3.59710229  | 0.0002401225806 |
| RAC1          | -1.355164181 | 0.0002444102261 |
| SPOCK2        | -4.419469512 | 0.0002474997344 |
| ZSCAN16-AS1   | -1.461219801 | 0.0002479286896 |
| FOXG1-AS1     | -6.018204201 | 0.0002485594216 |
| ZNF345        | -1.487476185 | 0.0002503699054 |
| TNKS2-AS1     | -3.728040785 | 0.0002505536513 |
| RCS1D1        | -5.846109352 | 0.0002509566634 |
| WDR20         | -1.134379684 | 0.0002543925844 |
| C1S           | -3.414174396 | 0.0002547136878 |
| NOV           | -4.19664866  | 0.0002554299791 |
| SSBP2         | -2.282717774 | 0.0002608338993 |
| AREL1         | -1.10195675  | 0.000261842113  |
| TMEM132B      | -5.376276334 | 0.0002630405374 |
| SGCZ          | -6.75768137  | 0.0002631858383 |
| BPGM          | -1.08817451  | 0.0002632690706 |
| GSTK1         | -1.522254375 | 0.000264418092  |
| LINC01060     | -4.844039641 | 0.0002649837324 |
| TLX2          | -6.112251598 | 0.0002666913165 |
| C7orf73       | -1.13432957  | 0.0002669831816 |
| ALPL          | -6.109260454 | 0.0002684555945 |
| DIRAS1        | -1.729016034 | 0.0002695335243 |
| ITGB3         | -4.084554332 | 0.0002698704952 |
| ALKBH4        | -1.826707945 | 0.0002699207175 |
| GRIP2         | -5.616497764 | 0.0002701641166 |
| BDNF-AS       | -2.440499658 | 0.0002701641166 |
| IFI44L        | -6.823180994 | 0.0002716000772 |
| TMEM71        | -3.913995647 | 0.0002721894682 |
| PLTP          | -3.39070818  | 0.0002735563401 |
| PIK3R1        | -1.600638945 | 0.0002735563401 |
| PTGIS         | -7.463248248 | 0.0002768317054 |
| PCGF3         | -1.337546151 | 0.0002768498244 |

|               |             |                |
|---------------|-------------|----------------|
| LRFN5         | 5.64381574  | 0.001537452728 |
| RP11-26J3.1   | 3.195826099 | 0.001540317144 |
| CTD-3131K8.2  | 1.618109617 | 0.001550529686 |
| RIPK2         | 1.600186203 | 0.001553100893 |
| ANKRD18CP     | 3.527253378 | 0.001554145871 |
| AC098824.6    | 2.277679948 | 0.001557595646 |
| RP11-108K3.1  | 5.359911445 | 0.001590979682 |
| KCNT2         | 3.799814021 | 0.001593418654 |
| FUCA2         | 1.404027309 | 0.001596606665 |
| RBL2          | 1.2240706   | 0.001610059573 |
| RABGEF1       | 1.725345461 | 0.001619465417 |
| JPH3          | 5.022404975 | 0.001624836458 |
| PTPRU         | 2.489698728 | 0.001652467175 |
| SLC38A10      | 1.478383016 | 0.001672292373 |
| ISOC1         | 2.401780476 | 0.001677124986 |
| SLC12A7       | 2.016885754 | 0.001677124986 |
| TEAD4         | 1.779013698 | 0.001677124986 |
| CEP76         | 1.132219521 | 0.001681637115 |
| C17orf58      | 1.031863211 | 0.001681637115 |
| ZDHHC11       | 2.532078098 | 0.00169144635  |
| EMX1          | 5.699629578 | 0.00169985767  |
| FAM133A       | 4.545321191 | 0.001704653086 |
| CYP51A1       | 2.527089481 | 0.00171374841  |
| CASC20        | 5.373598885 | 0.001717624055 |
| SERPINB7      | 5.553020716 | 0.001719880577 |
| ECSIT         | 1.639205203 | 0.0017216827   |
| PYCR1         | 1.864939242 | 0.001731836472 |
| GAS5          | 1.714774757 | 0.001737349134 |
| MSTO2P        | 1.003346545 | 0.001751780518 |
| ERMP1         | 2.208046787 | 0.001778247234 |
| LINC00858     | 5.202331    | 0.001792908341 |
| NUCB2         | 1.141075358 | 0.001818909996 |
| RGL3          | 3.249799844 | 0.001823263231 |
| KCNMB3        | 1.482012857 | 0.001825882795 |
| CTD-2575K13.6 | 3.810233118 | 0.001836237149 |
| RASAL2        | 1.2850993   | 0.001839736086 |
| CHCHD6        | 1.473421929 | 0.001863256782 |
| SP110         | 1.142791827 | 0.001863938051 |
| AQP11         | 1.622595425 | 0.001878547573 |
| HERC5         | 1.393566605 | 0.001888464442 |
| MRPL2         | 1.950014643 | 0.001921733875 |
| ZNF850        | 1.842531017 | 0.001923349143 |
| CCDC28A       | 1.391034511 | 0.001931643352 |
| ISG20         | 3.006849006 | 0.001931643352 |
| RPS6KB2       | 1.231233459 | 0.001936588515 |
| TBX6          | 2.019051451 | 0.001937940454 |
| MAFF          | 2.134233766 | 0.001939639259 |
| OVOS2         | 2.16237399  | 0.001943611156 |
| PHOSPHO1      | 4.98924047  | 0.001954683979 |
| RP11-273G15.2 | 4.355439323 | 0.001960726502 |
| SERPINB9P1    | 4.380934561 | 0.001960820253 |
| ARL1          | 1.058415242 | 0.002008049768 |
| CLIP4         | 1.856614128 | 0.002016757808 |
| CUL2          | 1.170760209 | 0.00202539352  |
| PDP2          | 1.632040955 | 0.002034066042 |
| GPR160        | 3.521102476 | 0.002042541638 |
| CTD-2589M5.5  | 5.00840386  | 0.002049313577 |
| CT45A5        | 5.30697274  | 0.002068634764 |
| CTA-292E10.6  | 1.83530987  | 0.002103897253 |
| EFNA5         | 3.700532072 | 0.002104887158 |
| C1orf115      | 2.761689151 | 0.002105672566 |
| COL12A1       | 3.37911517  | 0.002110433248 |
| TIFA          | 1.518750588 | 0.002117810883 |
| CTC-455F18.3  | 5.356960969 | 0.002118365116 |
| LMNTD2        | 3.368227925 | 0.00214247161  |
| RP11-276H7.2  | 4.864001821 | 0.002168345373 |
| DSG2          | 1.868598967 | 0.002171615486 |
| RP11-445O3.2  | 5.297465727 | 0.002174603479 |

|               |              |                 |
|---------------|--------------|-----------------|
| FKRP          | -2.060296406 | 0.0002794688007 |
| ST6GAL1       | -2.173197724 | 0.0002812994827 |
| ITGB5         | -1.654527117 | 0.0002812994827 |
| RP11-698N11.2 | -5.905142346 | 0.0002839375426 |
| MTSS1L        | -1.986879617 | 0.0002875948151 |
| CUEDC1        | -1.785673907 | 0.0002877944497 |
| RAB9B         | -1.996872307 | 0.0002884489359 |
| RP11-218E20.3 | -6.164438919 | 0.0002884489359 |
| SHROOM3       | -2.421218774 | 0.0002887211469 |
| CARHSP1       | -1.442886255 | 0.00029491203   |
| HIF3A         | -6.040929086 | 0.0002954027247 |
| SBK1          | -1.525217342 | 0.0002963353223 |
| SPRED1        | -1.48976821  | 0.0002999376624 |
| CILP          | -6.052061456 | 0.0003006211507 |
| C12orf76      | -1.546014759 | 0.0003033741668 |
| ASXL3         | -6.566258252 | 0.0003043854911 |
| CCDC144A      | -4.443138448 | 0.0003052356379 |
| VEZF1         | -1.071052799 | 0.0003063860927 |
| COA1          | -1.041327704 | 0.0003164258104 |
| SEMA3A        | -2.196764502 | 0.00031877083   |
| WFDC2         | -5.127485028 | 0.0003198412785 |
| NUPL2         | -1.622198945 | 0.0003211259925 |
| TMEM117       | -1.419785806 | 0.0003253366882 |
| TMEM206       | -2.139153035 | 0.0003281907788 |
| GBAP1         | -2.070216454 | 0.0003301266904 |
| LINC01748     | -5.173272614 | 0.0003304188215 |
| PIFO          | -4.663890261 | 0.0003332156741 |
| ICMT          | -1.14326692  | 0.0003345020124 |
| TMEM189       | -1.3539642   | 0.0003350175392 |
| DCLK2         | -2.814230064 | 0.0003362538146 |
| TADA2A        | -1.238555727 | 0.0003362883058 |
| AC007204.2    | -6.208465703 | 0.000337371729  |
| SPRY1         | -3.912389351 | 0.0003397114271 |
| RP11-384F7.2  | -5.770543132 | 0.0003414203548 |
| GANC          | -1.099202034 | 0.0003416792693 |
| CLIP2         | -2.743310964 | 0.000342114741  |
| BTBD7         | -1.364353956 | 0.0003465261245 |
| RP11-838N2.5  | -6.037508918 | 0.0003469971602 |
| ZNF433        | -3.222613454 | 0.000347826369  |
| GPR162        | -3.225098104 | 0.0003482257229 |
| ZBTB16        | -5.496267258 | 0.0003486629255 |
| DCT           | -4.377877722 | 0.0003535605571 |
| SLC25A18      | -5.786427008 | 0.0003601694872 |
| SRPK2         | -1.236213978 | 0.0003627820659 |
| C9orf170      | -5.720069529 | 0.0003627820659 |
| ERCC3         | -1.077530913 | 0.0003628295109 |
| ZMYM5         | -1.420805513 | 0.0003633304469 |
| LIMK1         | -2.803878421 | 0.0003640081845 |
| CFDP1         | -1.457273581 | 0.0003640081845 |
| FAM47E        | -3.61979543  | 0.0003658306901 |
| GDF11         | -2.140199909 | 0.000367709583  |
| TULP4         | -1.110666178 | 0.0003684769491 |
| OGDH          | -1.526948973 | 0.0003706432143 |
| TMEM178B      | -4.884795858 | 0.0003708921934 |
| RC3H2         | -1.025091362 | 0.0003738298148 |
| UBR7          | -1.050748698 | 0.0003749530334 |
| PYGM          | -3.789423953 | 0.0003749530334 |
| DDX24         | -1.195062903 | 0.0003765252545 |
| ZFP2          | -3.585595095 | 0.0003767621378 |
| TRUB2         | -1.977349448 | 0.0003787311734 |
| BRI3          | -1.207237716 | 0.0003791440969 |
| RPL23AP7      | -1.573655905 | 0.0003792240745 |
| REV1          | -1.047698989 | 0.0003799781326 |
| MASP1         | -7.7266062   | 0.0003823726403 |
| PKIG          | -3.052054967 | 0.0003837702321 |
| CTD-2528L19.6 | -1.793558835 | 0.0003862636578 |
| ROBO1         | -1.805351697 | 0.0003863106457 |
| BACE1-AS      | -1.443267009 | 0.0003869969702 |

|               |             |                |               |              |                 |
|---------------|-------------|----------------|---------------|--------------|-----------------|
| MUC3A         | 3.821755621 | 0.002175368184 | WDR25         | -1.868920238 | 0.0003873956196 |
| NPDC1         | 1.878743729 | 0.002187760254 | LIPH          | -6.158177188 | 0.0003900339272 |
| CFAP57        | 3.619133066 | 0.002193760096 | CARMIL1       | -2.381485444 | 0.0003914098214 |
| ERVK-28       | 3.507293559 | 0.002219708396 | ESPN          | -4.848843912 | 0.0003915218311 |
| HGS           | 1.304995872 | 0.002227426846 | ADGRL1        | -1.685372987 | 0.0003937163236 |
| UXT-AS1       | 2.187486049 | 0.002240510999 | PCDH12        | -6.013656318 | 0.0003939582907 |
| B3GAT2        | 4.326432392 | 0.002243405636 | DNASE1        | -1.684415537 | 0.0003939582907 |
| AC007040.11   | 3.466808863 | 0.002252917358 | THEMIS2       | -3.546700876 | 0.0003948597105 |
| TNFRSF10C     | 2.63441837  | 0.00225495612  | XK            | -6.163172758 | 0.0004001814932 |
| GXYLT1P5      | 5.399280338 | 0.00225750151  | APOL4         | -6.446356989 | 0.0004006808264 |
| SLC25A27      | 3.59421987  | 0.002270242234 | CAMKV         | -3.402302075 | 0.0004019778668 |
| MYH16         | 4.529989775 | 0.002315491339 | ZKSCAN4       | -1.777717674 | 0.0004040534732 |
| MYO15B        | 2.216823759 | 0.002319364735 | LCMT2         | -1.408766587 | 0.0004046466973 |
| IDI1          | 1.411945221 | 0.002323803762 | ZEB2          | -2.988642347 | 0.0004082361186 |
| PRSS53        | 1.691305524 | 0.002325730339 | FLRT1         | -5.812831697 | 0.0004106557432 |
| AC137932.6    | 4.936227677 | 0.002326603314 | LPAR6         | -7.048559134 | 0.0004144617019 |
| RNASET2       | 1.772774899 | 0.002330761318 | RP11-216B9.6  | -2.91571161  | 0.0004165283251 |
| SYBU          | 2.901292934 | 0.002349839911 | MKRN7P        | -5.89447407  | 0.0004172726828 |
| RNASE10       | 5.455883562 | 0.002355302083 | ABCC6P2       | -5.74302664  | 0.0004173912658 |
| CARD8-AS1     | 1.859352843 | 0.002363507089 | SAP18         | -1.211323091 | 0.0004215602091 |
| TMF1          | 1.43985376  | 0.002405874455 | TRIM27        | -1.456792493 | 0.0004305401852 |
| ASIC3         | 1.971349946 | 0.002406035247 | TAPT1         | -1.490575276 | 0.0004309331332 |
| RP5-101101.2  | 3.750543005 | 0.0024213379   | KCNIP4        | -6.319513904 | 0.0004316625232 |
| PIGZ          | 1.453323206 | 0.002424063441 | ZBTB34        | -1.243684454 | 0.0004317803252 |
| LINC01024     | 1.414845232 | 0.002426669236 | AKIRIN1       | -1.335905692 | 0.0004343339933 |
| SQSTM1        | 1.3876862   | 0.002433702749 | LLNLR-245B6.1 | -1.761195398 | 0.0004349915419 |
| TYSDN1        | 1.019071886 | 0.002446071019 | STAG3L2       | -1.470266106 | 0.0004350216878 |
| ABC13-4748860 | 2.813551695 | 0.002448828568 | RAB8B         | -1.343883294 | 0.0004350522156 |
| PDE11A        | 3.453832853 | 0.002472297346 | AF127936.9    | -2.501819757 | 0.0004353287072 |
| RARS          | 1.340440911 | 0.002505096368 | PALMD         | -6.724504384 | 0.0004437422021 |
| RP11-783K16.5 | 2.211442807 | 0.002505096368 | TMEM198B      | -1.744418197 | 0.0004437422021 |
| GOLGA7        | 1.083449249 | 0.00250931742  | CDC42EP5      | -3.495141466 | 0.0004480469678 |
| FES           | 4.199193872 | 0.002515623008 | TMTC4         | -1.460991474 | 0.0004490877643 |
| ARHGEF10      | 1.376884529 | 0.002520603555 | SERPINF1      | -4.706854681 | 0.000449774211  |
| BUB1          | 1.427294233 | 0.002530619371 | SLITRK3       | -5.239480202 | 0.0004522480856 |
| MRPS22        | 1.079874409 | 0.002533151074 | OSCP1         | -1.844143884 | 0.0004525887744 |
| PDE4DIP       | 1.048544431 | 0.002556672903 | RP11-347E10.1 | -5.757603834 | 0.0004553496524 |
| PLIN1         | 2.986764859 | 0.002564297106 | UBXN2A        | -1.350383618 | 0.0004597840065 |
| NUAK2         | 2.415385596 | 0.00256771684  | COL23A1       | -7.352899084 | 0.0004605727315 |
| RP4-621F18.2  | 2.891474187 | 0.002586145421 | CTB-113D17.1  | -5.734937449 | 0.0004607993101 |
| RP11-686D22.5 | 5.227165141 | 0.002588758152 | TTC39A        | -5.479218511 | 0.0004692761231 |
| TUBA4A        | 2.110338898 | 0.002610244378 | SLC35E3       | -1.158362154 | 0.0004712153264 |
| SPIDR         | 1.202417229 | 0.00262751235  | TOE1          | -1.530474944 | 0.0004740127705 |
| TCHH          | 4.085335028 | 0.002644818322 | TERF2IP       | -1.082798588 | 0.0004755326231 |
| CDKL1         | 1.247930004 | 0.002650618585 | UBTD2         | -1.262416715 | 0.0004755326231 |
| STRBP         | 1.054375095 | 0.002660599866 | ADAM23        | -2.947333749 | 0.0004757096053 |
| NLRP3         | 3.510340128 | 0.002667442274 | ACAP3         | -1.997884781 | 0.0004761260454 |
| CCDC125       | 2.030840177 | 0.002684419434 | ILDR2         | -3.688454154 | 0.0004785281393 |
| TLCD1         | 1.908959851 | 0.002690394619 | FAR2          | -4.923025966 | 0.0004855861352 |
| NBEAL2        | 1.842945699 | 0.002691297434 | TTL           | -1.252130018 | 0.000490028044  |
| RP11-982M15.6 | 4.795134696 | 0.002743005064 | NEUROD1       | -5.863123254 | 0.0004901415089 |
| GLTSCR1L      | 1.038213169 | 0.002751679981 | ZSCAN26       | -1.600397702 | 0.0004901415089 |
| CR848007.2    | 3.432343229 | 0.002751826633 | CHAMP1        | -2.329984077 | 0.0004946314486 |
| NOB1          | 1.39200049  | 0.002764911897 | RHOQ          | -1.664656514 | 0.0004979391255 |
| GOLPH3L       | 1.177245506 | 0.002768792228 | PLPPR3        | -6.030245825 | 0.0004993375561 |
| PANK4         | 1.300454609 | 0.002768792228 | C2orf70       | -5.633195204 | 0.0004999601834 |
| PACSIN1       | 3.338448909 | 0.002770847259 | CHN1          | -1.329591775 | 0.0005003871812 |
| TARID         | 5.131806908 | 0.002771968959 | PPIF          | -1.393159109 | 0.0005048035131 |
| CDT1          | 1.835515085 | 0.002772749002 | AMMECR1L      | -1.161534664 | 0.0005092677503 |
| CTD-2314G24.2 | 5.351285335 | 0.002777985103 | MARCKS        | -2.078331531 | 0.0005124452688 |
| COX6B2        | 3.714060817 | 0.002816058129 | RP11-227D13.1 | -5.867579877 | 0.0005170571664 |
| GTF2H5        | 1.372123801 | 0.002844422083 | BMX           | -5.888720786 | 0.000517729753  |
| WWC1          | 1.632212632 | 0.002876683197 | IKZF2         | -3.180650412 | 0.0005178334728 |
| ANG           | 2.160063068 | 0.002890435816 | SLC25A13      | -1.885490752 | 0.0005179845633 |
| FAM49B        | 1.891508876 | 0.002892038074 | THBS4         | -1.731446231 | 0.0005182361025 |
| SDHB          | 1.342177147 | 0.002924637615 | PCDHGB7       | -4.301777807 | 0.0005182361025 |
| S1PR1         | 3.41104212  | 0.002942048979 | SMAD4         | -1.262961469 | 0.0005198886765 |
| ACBD5         | 1.260759956 | 0.002947921121 | SEMA4C        | -1.503836974 | 0.0005274199798 |



|               |             |                |
|---------------|-------------|----------------|
| RP11-568K15.1 | 3.239117993 | 0.002972692154 |
| HLA-H         | 2.172928841 | 0.00297946098  |
| CBFA2T3       | 5.8058382   | 0.002982156961 |
| SLC16A3       | 3.766084138 | 0.002985825474 |
| AP000640.10   | 5.400424159 | 0.002995682983 |
| ARL17B        | 2.118620332 | 0.002998582038 |
| ITPKA         | 2.305681724 | 0.003012175373 |
| ACAP1         | 4.827890215 | 0.003023538269 |
| KATNA1        | 1.437395811 | 0.003043211262 |
| PDGFRL        | 2.448051652 | 0.003045559286 |
| APOL6         | 2.402125252 | 0.003052370147 |
| TIGD6         | 1.090552702 | 0.003058712393 |
| FLII          | 1.199308545 | 0.003062528375 |
| NDUFC1        | 1.149202519 | 0.00308601753  |
| LARS          | 1.0904858   | 0.003111621492 |
| SCYL1         | 1.545494851 | 0.003111621492 |
| AC069277.2    | 5.147331362 | 0.003112925884 |
| RPS3          | 1.164655539 | 0.00311883998  |
| CTBS          | 1.238577651 | 0.003157362787 |
| AP000695.4    | 3.416925837 | 0.003157362787 |
| IFIH1         | 1.636605485 | 0.003179519061 |
| DSTN          | 1.057220262 | 0.003179519061 |
| AC018816.3    | 5.17125313  | 0.003190497569 |
| RP11-565A3.2  | 5.252153328 | 0.003195230488 |
| BIRC2         | 1.296061225 | 0.003233757508 |
| TESMIN        | 3.937736647 | 0.003243881235 |
| PRDM9         | 5.196390509 | 0.003255958878 |
| PIK3CB        | 1.190227231 | 0.003266392816 |
| OSR2          | 1.816724702 | 0.003292340746 |
| BTC           | 4.191286454 | 0.0032937472   |
| FEZ2          | 1.606738363 | 0.003314191503 |
| GTPBP2        | 1.097211251 | 0.003319575422 |
| DHX34         | 1.266315824 | 0.003350781558 |
| RP11-141C7.5  | 2.647802042 | 0.003350781558 |
| USO1          | 1.222457362 | 0.003376315235 |
| SPATA4        | 3.165186094 | 0.003400698606 |
| GSTP1         | 1.438224407 | 0.003408418853 |
| C15orf48      | 4.012313451 | 0.003439412021 |
| MPP4          | 2.945211565 | 0.00344669011  |
| UCHL1-AS1     | 3.427530133 | 0.003512105265 |
| AC129492.6    | 4.059740766 | 0.003514426529 |
| F12           | 2.241611681 | 0.003514683548 |
| GNAL          | 3.812435713 | 0.003517352423 |
| PHLDB3        | 1.84834765  | 0.003529503524 |
| AC140912.1    | 3.255235499 | 0.003529503524 |
| CHRCA1        | 1.221376182 | 0.003531097158 |
| CUL5          | 1.13192506  | 0.003545923711 |
| ATAD5         | 1.107936454 | 0.003567230275 |
| RP11-626P14.2 | 2.26797985  | 0.003569273891 |
| CTD-2126E3.1  | 2.962621907 | 0.003576745562 |
| RBM24         | 2.29393593  | 0.003611354347 |
| MLF1          | 1.891544441 | 0.003629853842 |
| CFAP36        | 1.228849857 | 0.003673241321 |
| RNF139        | 1.54899124  | 0.003681355462 |
| ROBO3         | 1.89230183  | 0.003686703315 |
| COQ2          | 1.35206452  | 0.003692141614 |
| EPRS          | 1.30570885  | 0.003705242083 |
| LINC01776     | 3.983772495 | 0.003706084058 |
| RP11-211G23.2 | 5.094660684 | 0.003707479166 |
| CSNK1A1       | 1.216822539 | 0.003725529025 |
| RP11-114H21.2 | 5.281203818 | 0.003726359863 |
| DHDH          | 3.430326768 | 0.003742443548 |
| DNAI1         | 3.383229077 | 0.003745839579 |
| CCNA2         | 1.282386671 | 0.003748401343 |
| APOBEC3F      | 1.912420522 | 0.003751288281 |
| POLH          | 1.323002951 | 0.003754433076 |
| ALMS1-IT1     | 1.478924142 | 0.003776549229 |
| AC005264.2    | 5.278574391 | 0.00377830725  |

|               |              |                 |
|---------------|--------------|-----------------|
| PSMC1         | -1.094637772 | 0.0005311712444 |
| PTGS1         | -6.637075475 | 0.0005370997692 |
| RND1          | -2.925855885 | 0.0005392205274 |
| RP11-428J1.5  | -1.543597441 | 0.0005411830668 |
| AP5S1         | -2.031933481 | 0.0005424818889 |
| CTD-2516F10.2 | -3.097854954 | 0.0005424818889 |
| ARMCX6        | -1.865301847 | 0.0005477570947 |
| LINC01630     | -5.607228072 | 0.0005489052178 |
| DDX11L2       | -2.455600847 | 0.0005489052178 |
| NAPEPLD       | -2.582972854 | 0.0005514826019 |
| MOCS2         | -1.528636886 | 0.0005562311047 |
| SAMD1         | -1.137949242 | 0.0005568899314 |
| CD4           | -5.985825446 | 0.0005569540785 |
| UCK1          | -1.638566767 | 0.0005582483183 |
| PTPMT1        | -1.543709706 | 0.0005589973629 |
| COX11         | -1.49664347  | 0.0005617123892 |
| NOL4L         | -2.381079703 | 0.0005693639673 |
| SOX13         | -1.677816412 | 0.0005699552522 |
| MBTD1         | -1.252823664 | 0.0005716167567 |
| AC017104.6    | -3.316715648 | 0.0005752778421 |
| WNT7A         | -6.340549636 | 0.0005765290809 |
| ZNF79         | -1.620314897 | 0.0005823330771 |
| PCYOX1        | -1.349475538 | 0.0005853651584 |
| RTKN2         | -1.972386547 | 0.0005853651584 |
| ST3GAL5       | -3.300851484 | 0.0005889573993 |
| AGAP4         | -1.336505827 | 0.0005907559172 |
| PCMTD2        | -1.106555353 | 0.0005921613251 |
| ALS2CR12      | -2.642484351 | 0.0005931197565 |
| FOXB1         | -6.182157265 | 0.0005943278771 |
| POTEI         | -2.312419967 | 0.0005943278771 |
| NUP188        | -1.449043729 | 0.0005966540464 |
| ANKHD1-EIF4E1 | -1.934119146 | 0.0005969277368 |
| B3GALT2       | -5.292320752 | 0.0006004662344 |
| PURG          | -2.258714086 | 0.0006004662344 |
| RP11-263K19.6 | -2.906382897 | 0.0006004662344 |
| PLAGL2        | -1.067026298 | 0.0006024485267 |
| MKLN1         | -1.227464971 | 0.0006058288556 |
| SVIL          | -2.159804119 | 0.0006073678833 |
| PLA2G5        | -6.415639157 | 0.0006116149962 |
| STON2         | -6.103953149 | 0.0006116880584 |
| CDKN1C        | -1.728690271 | 0.0006121123269 |
| ERCC8         | -1.540618859 | 0.0006137193714 |
| RP11-507K2.3  | -5.740163394 | 0.0006139981934 |
| AP5M1         | -1.362066745 | 0.0006156871384 |
| CD27-AS1      | -1.901100354 | 0.0006156871384 |
| PDS5B         | -1.237664612 | 0.0006202012226 |
| W12-1896O14.1 | -5.597763786 | 0.000623047932  |
| ANKFY1        | -1.185855761 | 0.0006305477162 |
| FAM126A       | -1.484986907 | 0.0006322646672 |
| CIRBP         | -1.846245573 | 0.0006366998712 |
| PCDHGC4       | -2.834557638 | 0.0006379300563 |
| KCNJ9         | -5.947140709 | 0.0006401362418 |
| SP9           | -5.970839704 | 0.000642315236  |
| STAT2         | -1.017569891 | 0.0006428825236 |
| FMNL3         | -1.62325652  | 0.0006452305685 |
| ZNF701        | -2.042174059 | 0.000645672792  |
| NAV1          | -1.51918148  | 0.0006458893652 |
| RALGDS        | -1.427784417 | 0.0006472593819 |
| TMEM57        | -1.29783017  | 0.000647412725  |
| ADAMTS5       | -4.373592374 | 0.0006509266293 |
| SEC61G        | -1.480040005 | 0.0006510800115 |
| PTPN4         | -1.779165956 | 0.0006525371977 |
| ZFP30         | -4.077732769 | 0.0006545522028 |
| PRKRIP1       | -1.683699027 | 0.0006566778147 |
| MT3           | -7.567759186 | 0.0006568096718 |
| FGF14         | -5.749996286 | 0.0006607185698 |
| LRRC8A        | -2.405116221 | 0.000666712098  |
| SMTNL2        | -5.861382662 | 0.000671159774  |

|               |             |                |
|---------------|-------------|----------------|
| TMEM63B       | 1.061736475 | 0.003785927863 |
| SCRN2         | 1.171469588 | 0.003810602659 |
| MASTL         | 1.299320954 | 0.003834401889 |
| RCE1          | 1.191441511 | 0.003845918176 |
| MYADM         | 1.73723218  | 0.003874123523 |
| AJ003147.9    | 3.526535287 | 0.003895413923 |
| UFC1          | 1.074607799 | 0.003906506877 |
| CCDC163       | 2.65879604  | 0.003906506877 |
| HOXC10        | 3.240617099 | 0.00391914543  |
| NLRP14        | 3.395962833 | 0.003923245392 |
| ARMC1         | 1.061680502 | 0.003941858562 |
| C11orf68      | 1.767235805 | 0.003946119758 |
| C2orf82       | 2.143657279 | 0.003954404804 |
| CFHR1         | 5.121549009 | 0.004039683638 |
| C11orf65      | 1.684546621 | 0.004043590229 |
| TMBIM1        | 2.98133395  | 0.004057393204 |
| RPL23AP49     | 2.31440418  | 0.004065703319 |
| RRAS          | 2.350801858 | 0.004097961974 |
| VDR           | 3.149456286 | 0.004114630799 |
| ZUFSP         | 1.758944026 | 0.004122196302 |
| RPL3          | 1.104790604 | 0.004135022035 |
| RAC3          | 1.538541062 | 0.00413613322  |
| GUCY1B3       | 2.333102441 | 0.004168022024 |
| KRT80         | 3.616414346 | 0.004177499405 |
| ANKRD49       | 1.129734606 | 0.004215522146 |
| HACL1         | 1.526402891 | 0.00422753797  |
| DLGAP4-AS1    | 3.802442206 | 0.004250083204 |
| RP11-432J22.2 | 1.669411574 | 0.004252190209 |
| EPS8L1        | 1.854089418 | 0.004254237365 |
| RP11-504P24.9 | 1.962017455 | 0.004254237365 |
| NXNL2         | 3.751925868 | 0.004269207885 |
| MYO1B         | 3.725396612 | 0.004269690228 |
| PNPLA7        | 2.036273424 | 0.004279685898 |
| HTT           | 1.21345148  | 0.004283982501 |
| TXLNA         | 1.00075337  | 0.00428866993  |
| EBNA1BP2      | 1.462701155 | 0.004326468787 |
| RP11-98I9.4   | 1.842933091 | 0.004333315917 |
| TIMM44        | 1.110064762 | 0.004401082052 |
| PLPP2         | 2.606953319 | 0.004421971241 |
| HNFA4G        | 2.965984565 | 0.004433280276 |
| RP11-610P16.1 | 2.850455675 | 0.004433280276 |
| RP11-547D24.1 | 4.721708797 | 0.004476192619 |
| PVT1          | 1.306446058 | 0.004494224275 |
| WASHC5        | 1.071949136 | 0.004498910378 |
| MIIP          | 1.563275249 | 0.004498888838 |
| NBEAP1        | 3.070261518 | 0.004506808122 |
| ATL3          | 1.035662144 | 0.004523243843 |
| LINC01111     | 5.511718329 | 0.004537567949 |
| EML3          | 1.062047184 | 0.004548928071 |
| PEX2          | 1.294604673 | 0.004559218413 |
| RDM1          | 1.579161529 | 0.004566798972 |
| CLPB          | 1.155363054 | 0.004580350482 |
| NUDT17        | 1.179491928 | 0.004580350482 |
| RADIL         | 2.48487725  | 0.004582944642 |
| BASP1         | 3.304094878 | 0.004583330498 |
| METTL5        | 1.080075828 | 0.004598870541 |
| JAK3          | 2.839035813 | 0.004626541908 |
| RP1-137D17.1  | 5.038749263 | 0.004627321859 |
| TBC1D9B       | 1.363305773 | 0.004627839498 |
| SHOX2         | 1.181678162 | 0.004638412076 |
| RASGEF1C      | 2.275630924 | 0.004640907386 |
| HLA-F-AS1     | 1.5497679   | 0.004645809335 |
| MRPL11        | 1.16394183  | 0.004654054476 |
| C17orf67      | 1.822621419 | 0.004682166281 |
| EIF4EBP1      | 1.225661651 | 0.004707930298 |
| HERPUD1       | 1.397410583 | 0.004712102819 |
| PSD4          | 2.965774862 | 0.004759672167 |
| DVL1          | 1.684340606 | 0.00486452169  |

|               |              |                 |
|---------------|--------------|-----------------|
| PHC2          | -2.336265844 | 0.0006842141664 |
| DMTF1         | -1.362356312 | 0.0006842141664 |
| RP5-912I13.2  | -5.21900265  | 0.0006875965339 |
| FBXL3         | -1.540465124 | 0.000689868259  |
| TRPM8         | -5.743879581 | 0.0007069424627 |
| LIG4          | -1.759531589 | 0.0007069424627 |
| RNF38         | -1.043244419 | 0.0007106349871 |
| RFLNA         | -5.690737627 | 0.0007119552039 |
| THYN1         | -1.457705797 | 0.0007120292583 |
| CHIAP3        | -6.260111233 | 0.0007126999899 |
| C7orf43       | -1.530748781 | 0.0007135491804 |
| HCG17         | -4.4800824   | 0.0007135491804 |
| LIFR-AS1      | -3.059186499 | 0.0007322952109 |
| AC002454.1    | -5.217373136 | 0.0007379084536 |
| HNRNPA2B1     | -1.125577478 | 0.0007407571256 |
| EFCAB5        | -4.111277953 | 0.0007431640847 |
| DNM3          | -2.772483874 | 0.0007435643577 |
| NOTCH2NL      | -2.710624492 | 0.0007488159176 |
| BGN           | -5.615044703 | 0.0007510874363 |
| WSCD1         | -3.513596317 | 0.0007536343928 |
| SNX13         | -1.49318122  | 0.0007537808265 |
| ZFP14         | -1.672086188 | 0.0007567628286 |
| PDGFA         | -3.631335924 | 0.0007572727831 |
| RAP1GDS1      | -1.39906776  | 0.0007700383063 |
| FAM107B       | -2.376139257 | 0.0007711603332 |
| RP11-307B6.3  | -5.297361506 | 0.0007717132749 |
| IPCEF1        | -5.714955828 | 0.0007718938547 |
| SRI           | -2.491182572 | 0.0007773363264 |
| TBL2          | -1.483785536 | 0.0007781993894 |
| MFAP3L        | -1.692346466 | 0.0007781993894 |
| ZNF37BP       | -1.528435326 | 0.0007811011135 |
| POPDC2        | -5.778403573 | 0.0007816006471 |
| CSPG5         | -3.674995611 | 0.0007828209038 |
| FGFRL1        | -1.148882151 | 0.0007861963945 |
| ADCY8         | -4.317399422 | 0.000788357724  |
| ARL8A         | -1.86535076  | 0.0007928906959 |
| LYRM4         | -1.177468368 | 0.0007928906959 |
| TSNAXIP1      | -3.152207559 | 0.0007935908597 |
| MIMT1         | -6.075412883 | 0.0007965113531 |
| ALDH6A1       | -1.039424646 | 0.000800734132  |
| MINDY1        | -2.12224402  | 0.000800734132  |
| TMEM199       | -1.446290608 | 0.000800734132  |
| NXPH3         | -3.269626057 | 0.0008044918826 |
| KAT14         | -1.451512776 | 0.0008071111657 |
| SS18          | -1.026121465 | 0.0008113693346 |
| PROSER1       | -1.556303873 | 0.0008139272622 |
| C14orf132     | -1.479014586 | 0.0008142137478 |
| EGLN2         | -1.245875573 | 0.0008240334286 |
| DIP2A         | -1.190813364 | 0.0008271225309 |
| SMC5          | -1.272808196 | 0.0008278016108 |
| OLFM2         | -3.078028161 | 0.0008292004769 |
| NCAN          | -7.567858401 | 0.0008292004769 |
| MESTIT1       | -6.156109399 | 0.000840727958  |
| STAG3L1       | -1.771892284 | 0.0008534749287 |
| LRP1B         | -4.207098573 | 0.0008552203791 |
| AC027612.6    | -5.124045217 | 0.0008662936612 |
| LINC01102     | -5.979861627 | 0.0008665028436 |
| KIAA1161      | -1.411651014 | 0.0008702760952 |
| CERKL         | -5.870283045 | 0.000871424431  |
| ZBED3         | -1.176978703 | 0.0008807519926 |
| ATP6V0A2      | -1.592371826 | 0.0008893852279 |
| ADGRG1        | -4.440798232 | 0.000895656285  |
| NSG1          | -5.782386613 | 0.0008964264316 |
| SCFD2         | -2.162771664 | 0.0008994181883 |
| HKDC1         | -4.63898605  | 0.0009022556453 |
| LINC01158     | -3.599358667 | 0.0009065648927 |
| RP11-644F5.11 | -1.56797691  | 0.0009066423293 |
| EFHC2         | -5.800872569 | 0.0009087708486 |

|               |             |                |
|---------------|-------------|----------------|
| RP11-755F10.1 | 4.290032186 | 0.004897947718 |
| MTRFR2        | 1.643463726 | 0.004919819189 |
| PARP4P2       | 2.869266728 | 0.004929574104 |
| XXbac-BPG294I | 2.530545502 | 0.004953593184 |
| AC068831.10   | 2.283396586 | 0.004956503438 |
| FANCD2P2      | 4.566029376 | 0.005023118383 |
| TAF2          | 1.180512274 | 0.005026043336 |
| CAPN11        | 4.393558384 | 0.005035104753 |
| TMEM14C       | 1.133322474 | 0.00503944412  |
| RAB26         | 1.469735496 | 0.005051953101 |
| KIAA1257      | 2.27128739  | 0.005127991526 |
| NBPF3         | 1.012849574 | 0.005206256381 |
| MAP7D3        | 1.522062147 | 0.005224196594 |
| POLR3G        | 1.456386204 | 0.005226528405 |
| RP11-676J12.7 | 5.871415047 | 0.005231143184 |
| RPS20         | 1.112044108 | 0.005237988735 |
| CTD-3220F14.1 | 2.781303803 | 0.005275095619 |
| TRABD         | 1.696639361 | 0.005296480166 |
| PPM1F         | 1.149143685 | 0.005310336115 |
| OTUD7A        | 2.944783315 | 0.005327635563 |
| ADPRHL1       | 2.254185903 | 0.005384236398 |
| HINT3         | 1.262389731 | 0.005391968545 |
| ANXA4         | 1.080039129 | 0.005402096904 |
| RP11-147I3.1  | 2.66104179  | 0.005409339547 |
| OLA1          | 1.449919663 | 0.005459200033 |
| TMEM74B       | 3.229025508 | 0.005466152176 |
| MYCBPAP       | 3.297800959 | 0.005493085806 |
| MRPL24        | 1.343023087 | 0.005513507089 |
| WDR93         | 2.381798737 | 0.005540520446 |
| MYL12B        | 1.615088367 | 0.0055485532   |
| HLA-DOB       | 2.803747692 | 0.005555689097 |
| FH            | 1.277212987 | 0.00556589146  |
| ZNF330        | 1.349936054 | 0.005611983118 |
| SEZ6L2        | 3.652941782 | 0.005649555438 |
| NDUF57        | 1.91963818  | 0.005654947971 |
| GNPDA2        | 1.179762934 | 0.005679079249 |
| ACAD11        | 1.659899111 | 0.005686184971 |
| MLKL          | 3.117992487 | 0.005690931267 |
| ENKD1         | 1.593276914 | 0.00570051321  |
| PAPSS2        | 3.231283632 | 0.005736179243 |
| ARHGEF4       | 2.192242113 | 0.00579894925  |
| RFNG          | 1.540183514 | 0.005864186363 |
| WWP1          | 1.338351949 | 0.005874097686 |
| TMEM87B       | 1.286252218 | 0.005893794913 |
| RP6-24A23.3   | 4.523628477 | 0.00589811513  |
| NDNF          | 3.574724585 | 0.005940539682 |
| THAP4         | 1.375506715 | 0.005940539682 |
| TBC1D9        | 1.098874602 | 0.005964505308 |
| APRT          | 1.454839965 | 0.005964505308 |
| MYO7A         | 2.618041536 | 0.005981245505 |
| ADGRF5P1      | 3.719127858 | 0.006023151681 |
| SLC25A32      | 1.234185867 | 0.006048102946 |
| RFWD3         | 1.11757597  | 0.006083751041 |
| HLA-B         | 1.466645377 | 0.006089122383 |
| CMSS1         | 1.237816528 | 0.006126000265 |
| PAK1          | 2.269201331 | 0.006131264834 |
| CTD-3092A11.1 | 1.655251826 | 0.006136020716 |
| ACY3          | 3.489089775 | 0.006138327497 |
| LETM2         | 1.639964307 | 0.006151047724 |
| PIP4K2C       | 1.415475899 | 0.006161049313 |
| ENO1          | 1.041031541 | 0.006201122458 |
| SOCS2         | 3.062451408 | 0.006220676822 |
| ENTPD6        | 1.140937453 | 0.006258935377 |
| NPTX2         | 3.47764829  | 0.006281074856 |
| PRTN3         | 3.509253943 | 0.006287758337 |
| RP11-167H9.4  | 3.150506454 | 0.006292529877 |
| IFT74         | 1.2144118   | 0.006299650906 |
| MIR2052HG     | 3.947255514 | 0.006300265844 |

|               |              |                 |
|---------------|--------------|-----------------|
| RAP1GAP       | -1.748237365 | 0.0009118366537 |
| SCAF4         | -1.029350091 | 0.0009154269133 |
| TENM2         | -4.729213432 | 0.0009187397596 |
| ABHD11        | -2.239355234 | 0.0009193049761 |
| RP11-7807.2   | -3.269803284 | 0.0009193049761 |
| SMARCC2       | -1.063520582 | 0.0009264981633 |
| ZNF114        | -1.497348512 | 0.0009297164672 |
| HEPACAM       | -5.76113418  | 0.0009309387314 |
| HOXA2         | -4.939077497 | 0.0009362885439 |
| TTLL11        | -1.55986009  | 0.0009413369038 |
| POLR1A        | -1.140018193 | 0.0009425598121 |
| ITPR2         | -2.667634268 | 0.0009478641548 |
| AFDN-AS1      | -2.1176868   | 0.0009529911553 |
| GBAS          | -1.696377425 | 0.000955493229  |
| SHD           | -5.432634289 | 0.0009578666132 |
| NUPR1         | -4.420568895 | 0.0009594141259 |
| ZNF616        | -2.103509346 | 0.0009628237861 |
| MORN3         | -3.897658865 | 0.0009642532481 |
| AP000289.6    | -6.149069418 | 0.0009735564463 |
| RP5-115904.2  | -3.33637214  | 0.0009783005669 |
| CTB-118P15.2  | -5.481705306 | 0.0009795451864 |
| CTC-467M3.1   | -5.646775277 | 0.0009841545403 |
| PLK2          | -2.114942395 | 0.0009889705959 |
| ANKRD20A11P   | -2.370088227 | 0.0009919611781 |
| MCF2L         | -3.078548474 | 0.0009967475061 |
| TMEM229B      | -3.115280397 | 0.001000179647  |
| YLPM1         | -1.017819958 | 0.001002470897  |
| TNPO2         | -1.564672486 | 0.001013418859  |
| TRIP4         | -1.419664876 | 0.00102050976   |
| TSR2          | -1.198898478 | 0.001021421023  |
| GIGYF1        | -1.146287782 | 0.001023528166  |
| ZNF407        | -1.591542975 | 0.001024460409  |
| FAM13B        | -1.149549599 | 0.001024926722  |
| MON1B         | -1.055730348 | 0.001026221568  |
| TRAF4         | -1.517127663 | 0.001027681666  |
| PSAP          | -1.654737776 | 0.001027753675  |
| LINC00643     | -5.798397739 | 0.001033118589  |
| LAMP5         | -6.152030404 | 0.001033912465  |
| TRRAP         | -1.148486158 | 0.001039348434  |
| SLC35B4       | -1.401453987 | 0.001042435042  |
| PLGLB2        | -5.481491181 | 0.001042665889  |
| CH17-258A22.4 | -4.106535203 | 0.001045535751  |
| ASB6          | -1.675661709 | 0.001047795236  |
| HKR1          | -1.432214895 | 0.001068682443  |
| CTC-425O23.2  | -2.852989458 | 0.001073961961  |
| JAZF1         | -2.551653884 | 0.001074038028  |
| TCF7L2        | -2.759525068 | 0.001075604654  |
| LDOC1L        | -1.611056581 | 0.001080178245  |
| ARMCX5-GPRA   | -1.407923176 | 0.00109723521   |
| PTPA          | -2.074087073 | 0.00110347967   |
| PSPH          | -1.257732618 | 0.001108589596  |
| PSD3          | -2.587745319 | 0.001111568331  |
| PGBD1         | -1.425982376 | 0.001114511942  |
| RP1-273N12.4  | -4.680797573 | 0.001114511942  |
| SNRNP35       | -1.116655399 | 0.001132352051  |
| YKT6          | -1.768037349 | 0.001135622681  |
| C20orf96      | -1.142411246 | 0.001137296259  |
| BMPR2         | -1.229577638 | 0.001139058945  |
| BAMBI         | -2.710763062 | 0.001146776917  |
| FAM185BP      | -3.097363335 | 0.001146776917  |
| RGS2          | -2.691446825 | 0.001149342922  |
| TMEM201       | -1.551406696 | 0.00115425012   |
| ITFG2         | -1.343425396 | 0.001170528924  |
| ABCD2         | -2.983469516 | 0.001187605143  |
| KLHL4         | -3.007557136 | 0.001188115036  |
| AC002456.2    | -3.333117086 | 0.00119975203   |
| FUS           | -1.199979067 | 0.001206886185  |
| RP11-893F2.13 | -2.327250988 | 0.001208141242  |

|               |             |                |               |              |                |
|---------------|-------------|----------------|---------------|--------------|----------------|
| OSGIN2        | 1.231236012 | 0.006310215433 | ASS1          | -4.441350673 | 0.001209171395 |
| LINC01885     | 4.994167419 | 0.006321021797 | RAPGEF2       | -1.409371468 | 0.001218870822 |
| AC131056.3    | 4.994167419 | 0.006321021797 | CFAP44        | -1.662966401 | 0.001218901552 |
| PCNX2         | 2.539563468 | 0.006367894852 | LINC00032     | -3.221439138 | 0.001245355477 |
| LGALS1        | 2.21882012  | 0.006370787179 | PDE8B         | -3.700553355 | 0.001245744216 |
| AJ003147.8    | 3.284970252 | 0.006400022459 | ZNF273        | -1.542996435 | 0.001249096089 |
| PIGBOS1       | 1.000880743 | 0.00641802659  | VWA1          | -2.698634104 | 0.001250649091 |
| L3MBTL3       | 1.434549104 | 0.006471405453 | AC053503.11   | -5.392283488 | 0.00125124486  |
| TUBB8         | 2.832842369 | 0.006483562325 | UBE2F         | -1.537666482 | 0.001260329777 |
| ACBD4         | 1.590323333 | 0.006499035546 | SLC35A5       | -1.711519884 | 0.00127588523  |
| PTPN14        | 1.309262648 | 0.006518512581 | ZNF703        | -1.504813222 | 0.001283976059 |
| GBP1          | 2.465266646 | 0.006524101989 | CC2D2B        | -4.527423144 | 0.001295538248 |
| COMMD3        | 1.009450084 | 0.006532714084 | INPP4B        | -2.030011082 | 0.001298229868 |
| C19orf45      | 3.240817488 | 0.006544402877 | CHPF2         | -1.997068952 | 0.001300539951 |
| DEF6          | 3.605515311 | 0.006557158622 | RUNDC3A       | -5.397720084 | 0.001306188132 |
| MYDGF         | 1.276268008 | 0.006579413059 | LEMD1         | -5.974540089 | 0.001313165668 |
| DGKD          | 1.075134311 | 0.006668917994 | PSPC1P1       | -4.041619398 | 0.001313165668 |
| B3GNT4        | 2.692529731 | 0.006716031652 | LINC00945     | -5.54097168  | 0.001325653116 |
| LINC01202     | 5.044433095 | 0.006718757131 | CYGB          | -4.87104753  | 0.001327761303 |
| AIDA          | 1.027806676 | 0.006755697512 | PLCG1-AS1     | -2.769857823 | 0.001345851591 |
| MRPS10        | 1.418138402 | 0.006788305089 | ATP6V1B2      | -1.567900004 | 0.001350594139 |
| NUDT18        | 1.426394419 | 0.006788647007 | ADPGK         | -1.134811002 | 0.001350594139 |
| BAK1          | 1.32771267  | 0.006789221904 | NR6A1         | -1.929138252 | 0.001365775065 |
| LINC01001     | 2.271547507 | 0.006862132394 | TSPOAP1       | -5.614674885 | 0.001372251799 |
| BRMS1         | 1.413838982 | 0.006888058205 | ZNF510        | -1.429627072 | 0.001376199344 |
| MCOLN3        | 3.478039877 | 0.006921858627 | GPR88         | -5.994892806 | 0.001380553291 |
| CCDC88B       | 2.05545113  | 0.006967348885 | CC2D2A        | -1.390230277 | 0.001385648879 |
| NDUFS8        | 1.679540398 | 0.006992665117 | GTDC1         | -1.111713956 | 0.001391514196 |
| ELF4          | 3.063217715 | 0.007009850199 | HOXD3         | -5.49486847  | 0.001398162548 |
| G2E3          | 1.517291239 | 0.007024580778 | PLEKHA8       | -1.634648153 | 0.001400125611 |
| TRMT112       | 1.286658906 | 0.007054145375 | AKR1B1        | -1.555125241 | 0.00140546207  |
| PLCH2         | 5.413050575 | 0.007056366685 | RP4-657D16.3  | -3.717522492 | 0.001415189303 |
| SPATA2L       | 1.888749159 | 0.007077079882 | MTMR9LP       | -2.237656843 | 0.001420092965 |
| GNRHR2        | 1.733210137 | 0.007101758843 | RRP15         | -1.458057326 | 0.001427397675 |
| LINC01939     | 6.274155912 | 0.007125126266 | DOK1          | -1.831450135 | 0.001437456887 |
| ASPSCR1       | 1.548665312 | 0.007131859271 | PGM5          | -4.077048408 | 0.001439414878 |
| LRR1Q3        | 1.481463817 | 0.007137382754 | PITPNA        | -1.191190374 | 0.001446673682 |
| ANAPC5        | 1.354446441 | 0.007216952797 | RP3-405J10.3  | -2.720753833 | 0.001451610997 |
| AC020571.3    | 4.550672319 | 0.007221518883 | ORMDL1        | -1.110626883 | 0.001455323896 |
| NR2E3         | 5.133960385 | 0.007245148391 | EPB41L5       | -1.761501922 | 0.00147055378  |
| WASH7P        | 1.870511785 | 0.007298988956 | SCHIP1        | -1.896485882 | 0.00147597191  |
| YIF1B         | 1.541856075 | 0.007312925369 | HOXD4         | -5.415875505 | 0.001492918482 |
| E2F5          | 1.089922204 | 0.007348465916 | KITLG         | -4.343809756 | 0.001497542055 |
| LRR1Q1        | 3.918201538 | 0.007427381794 | CXADR         | -2.190400942 | 0.001504639423 |
| PCOTH         | 2.367560965 | 0.007460598712 | CACNB2        | -5.563294232 | 0.001504639423 |
| RP3-467K16.2  | 4.46813714  | 0.007460598712 | STUM          | -5.470119019 | 0.001504639423 |
| EML2          | 1.16215098  | 0.007464342372 | GIMAP2        | -3.133219139 | 0.001510593363 |
| AC092614.2    | 4.941359329 | 0.007464342372 | LINC01948     | -5.764782325 | 0.001519939855 |
| PIM1          | 1.451187687 | 0.007476320772 | IFT88         | -1.256084782 | 0.001525613517 |
| PSMB9         | 1.835877279 | 0.007490382249 | TNKS          | -1.461536459 | 0.001531083517 |
| CH17-13I23.3  | 2.925772483 | 0.007526322233 | LRRC75A       | -2.80130039  | 0.001532557354 |
| LPAR2         | 1.521608389 | 0.007550979834 | REPIN1        | -1.461968345 | 0.001535768797 |
| CYB5D1        | 1.498431445 | 0.007600996498 | ITM2B         | -2.251890341 | 0.001544067822 |
| CAMK4         | 3.308483917 | 0.007607305008 | FAM213B       | -2.065431482 | 0.001544067822 |
| UNC93B3       | 3.698699706 | 0.00766316423  | DUSP6         | -2.19281561  | 0.001557595646 |
| RP13-143G15.4 | 4.43834854  | 0.007680267498 | TNIK          | -2.903496877 | 0.001557595646 |
| NUDCD2        | 1.175689411 | 0.007700176587 | BEX3          | -1.215075789 | 0.001579322253 |
| GAS6          | 1.867290279 | 0.007776963211 | RP11-141M1.3  | -5.389178491 | 0.001586759001 |
| IRF1          | 1.374984132 | 0.007836097101 | ZNF398        | -1.098284275 | 0.00159201165  |
| RP11-315O6.1  | 1.918246088 | 0.007885067528 | TTBK1         | -4.745425428 | 0.001611613291 |
| RAB3IP        | 1.710010051 | 0.007890185133 | ADAM22        | -1.886876099 | 0.0016332856   |
| PLEKHA3       | 1.205736867 | 0.007923721601 | LFNG          | -4.401100276 | 0.001641433711 |
| ACTRT3        | 3.041886853 | 0.007932721601 | DDR1          | -3.42640979  | 0.001650917708 |
| SLC2A12       | 1.408412676 | 0.007936253088 | ING4          | -1.682920315 | 0.001655799854 |
| RP11-415J8.5  | 2.871950971 | 0.007936253088 | RP11-430H10.1 | -5.529941441 | 0.001677124986 |
| KIF17         | 2.864257261 | 0.0080188601   | PIK3R3        | -2.00032277  | 0.001680898923 |
| HAR1A         | 4.666604453 | 0.008044817922 | ATP9A         | -2.26423251  | 0.00168516782  |
| EPB41L4B      | 1.832952383 | 0.008062502557 | BAX           | -1.699565106 | 0.00169985767  |

|               |             |                |               |              |                |
|---------------|-------------|----------------|---------------|--------------|----------------|
| ZNF860        | 1.983412176 | 0.008071271146 | ZNF618        | -1.913083268 | 0.001704263111 |
| SLC9A3R2      | 1.824836741 | 0.008179512043 | RHOBTB2       | -1.733428781 | 0.001708120284 |
| SLC3A2        | 1.460644012 | 0.00830256746  | SERP2         | -6.098550393 | 0.00171374841  |
| ZBTB38        | 1.447947042 | 0.008308455737 | CD101         | -5.39923216  | 0.001718425449 |
| LONRF3        | 2.298276317 | 0.008325519971 | GAS1RR        | -4.356538262 | 0.001723439264 |
| ATP1B1        | 1.762377221 | 0.008340099615 | CPM           | -3.507635036 | 0.001723473239 |
| PPIL6         | 1.653086843 | 0.008342269707 | MAPK7         | -1.335662546 | 0.001729643191 |
| NR2F2         | 1.668526158 | 0.008350048233 | AP006222.2    | -5.409402215 | 0.001739006595 |
| EMC9          | 1.58136355  | 0.008369481027 | RP11-612B6.2  | -5.2185601   | 0.001739823326 |
| CDKN2D        | 1.469987061 | 0.008371927113 | ELAC1         | -1.99132143  | 0.001743303832 |
| PCSK4         | 2.193944768 | 0.008373008701 | WDR47         | -1.246292028 | 0.001752505851 |
| NEK5          | 3.321760242 | 0.008394822291 | C9orf85       | -1.363159949 | 0.001757229442 |
| PPP1CA        | 1.279899255 | 0.008451994788 | ZNF607        | -2.573572163 | 0.001758080186 |
| TRAM1         | 1.308153921 | 0.008484773304 | CASQ1         | -5.875069705 | 0.001760278683 |
| PGGHG         | 1.615200075 | 0.008488698839 | C2orf27A      | -2.48725537  | 0.001760278683 |
| CNFN          | 4.984643918 | 0.008494500542 | GALNT7        | -1.317781676 | 0.001760688009 |
| STC2          | 2.130682695 | 0.008548755807 | CAMSAP2       | -1.688860712 | 0.001775311086 |
| ESRRA         | 1.238431682 | 0.008555358899 | NDUFB2        | -1.281500233 | 0.001782880306 |
| SNPH          | 1.663377893 | 0.008609605431 | SURF1         | -1.417732177 | 0.001783553302 |
| TRIM47        | 1.984352732 | 0.008609605431 | PRKACB        | -1.399679528 | 0.001786126136 |
| PRIM2         | 1.453186284 | 0.008617399722 | TRO           | -1.408437789 | 0.001792908341 |
| NEK8          | 1.273202264 | 0.008633506123 | TRAPPC2       | -1.546873006 | 0.001798370002 |
| USP14         | 1.037878714 | 0.008634750459 | RPS6KA2       | -3.39763146  | 0.001799233873 |
| HMGA1         | 1.952942405 | 0.008662006849 | RP11-81H14.2  | -5.286201455 | 0.001804927089 |
| AC137932.4    | 2.795844251 | 0.00869507607  | RP11-38M8.1   | -5.989338989 | 0.001825357441 |
| SLC4A9        | 2.868599661 | 0.008699825583 | AP3B2         | -4.743068214 | 0.00182738135  |
| SLC47A1       | 1.87458136  | 0.008743852052 | JPH4          | -6.141442203 | 0.001828448329 |
| TNFSF12       | 2.122352396 | 0.008786932218 | RXFP1         | -4.867732018 | 0.001839736086 |
| CH17-469D17.1 | 5.140924526 | 0.008978492472 | GPR19         | -2.168209255 | 0.001843030329 |
| BHLHE40       | 1.844682013 | 0.009011761543 | CBR3-AS1      | -2.111612848 | 0.001848250624 |
| TOR3A         | 1.417181194 | 0.009031375209 | SUFU          | -1.143874065 | 0.001850765861 |
| GAS2L3        | 1.006753704 | 0.009047458163 | VTN           | -4.957915379 | 0.001856139089 |
| FAM84B        | 1.960970582 | 0.009079418097 | KANSL3        | -1.087773725 | 0.001859565864 |
| COMTD1        | 2.554934906 | 0.009123856803 | USP2          | -1.702051063 | 0.001863938051 |
| TM4SF1-AS1    | 3.203756647 | 0.009164230146 | PHF23         | -1.417662842 | 0.001868447494 |
| PPM1J         | 2.576050295 | 0.009173829677 | SNX11         | -1.34865531  | 0.00189522751  |
| TFPI2         | 3.082933004 | 0.009260298446 | MAP2K6        | -2.723085212 | 0.00189522751  |
| RP11-65E22.2  | 2.198296345 | 0.009420437793 | BTBD3         | -1.310719678 | 0.00191197591  |
| ANKFN1        | 4.844348945 | 0.009432152363 | TCTN1         | -1.353109434 | 0.001925945779 |
| RP11-798K23.1 | 4.808731238 | 0.0094402494   | LRP1          | -2.883113987 | 0.001931643352 |
| FRS3          | 1.298853299 | 0.009519040749 | COL28A1       | -4.494496314 | 0.001939639259 |
| COA4          | 1.008632045 | 0.0095553037   | NME5          | -5.81429289  | 0.001969691609 |
| VSIG10L       | 1.612915222 | 0.009581413625 | MIR181A2HG    | -3.068725026 | 0.001971044384 |
| RP11-381K20.2 | 2.670945807 | 0.009598075674 | PTX3          | -4.433381327 | 0.001981496599 |
| ADAMTS6       | 2.436437792 | 0.009602273143 | NUDCD3        | -1.718038597 | 0.001993722459 |
| EXOSC5        | 1.584990276 | 0.009661869382 | ZNF547        | -1.914533431 | 0.001999420215 |
| RNF34         | 1.042106883 | 0.009673761724 | PTPRG         | -1.644973667 | 0.00200099595  |
| CNN2          | 1.447195185 | 0.009674430396 | B4GALT5       | -1.882836191 | 0.002027691965 |
| SIPA1L3       | 1.621798139 | 0.009677210874 | ANGEL2        | -1.359643943 | 0.002028902514 |
| SERTAD4       | 3.039407178 | 0.009693058467 | LRRC75B       | -2.286462868 | 0.002054883078 |
| RP11-460B17.2 | 4.468328266 | 0.009700297729 | SPOUT1        | -1.57716728  | 0.002054883078 |
| EXOSC1        | 1.043694253 | 0.009705383178 | PBRM1         | -1.352841199 | 0.002059250533 |
| UBR2          | 1.274473497 | 0.009762832305 | RP11-495L19.1 | -4.385950377 | 0.002059250533 |
| SRF           | 1.150990435 | 0.00980149363  | TRMO          | -1.823014284 | 0.00206196536  |
| SNCA-AS1      | 4.835756356 | 0.009801529201 | KSR1          | -1.079490592 | 0.002067433228 |
| IL1A          | 5.009246886 | 0.009811691222 | SLC10A4       | -4.641003349 | 0.002074884951 |
| PRRC1         | 1.428758241 | 0.009834703337 | SORT1         | -1.182434614 | 0.002084518684 |
| C1orf112      | 1.271165254 | 0.009836671994 | CTC-30107.4   | -2.520257058 | 0.002121245305 |
| MAGEA4        | 5.532911472 | 0.009842597211 | ZNF444        | -1.514819889 | 0.002121680293 |
| RP11-816J6.3  | 4.80383904  | 0.009874746881 | PHEX          | -2.525576304 | 0.002129980868 |
| LIPE-AS1      | 1.590611256 | 0.009882149942 | ZFP92         | -5.485138638 | 0.002129980868 |
| PPP2R5A       | 1.322203669 | 0.009885444252 | COQ7          | -1.007032436 | 0.002132800771 |
| CTD-2540B15.9 | 4.018448288 | 0.00988955589  | INIP          | -1.00002656  | 0.002136516719 |
| AIM1L         | 4.457851278 | 0.009960755221 | CTNS          | -1.503832073 | 0.002136917781 |
| MEA1          | 1.390541957 | 0.0100518035   | EIF5          | -1.490435122 | 0.00214247161  |
| AP003068.23   | 2.087838199 | 0.0100518035   | PPFIBP1       | -1.562329375 | 0.002152984153 |
| SMIM1         | 5.034602763 | 0.01006068444  | NASP          | -1.200291752 | 0.002166809433 |
| AXL           | 2.783081733 | 0.01025045865  | SMARCD1       | -1.183170893 | 0.002186131154 |

|               |             |               |
|---------------|-------------|---------------|
| CEP192        | 1.04466848  | 0.01026137748 |
| AP3M2         | 1.290475409 | 0.01028301278 |
| SFTA1P        | 3.346689327 | 0.01028588464 |
| SLFNL1-AS1    | 1.774575445 | 0.01032988242 |
| JAK1          | 1.290805482 | 0.01035721323 |
| RP11-15A1.3   | 3.031428648 | 0.01041824749 |
| TMEM126A      | 1.06662998  | 0.01042308435 |
| POLRMT        | 1.543480099 | 0.01042935935 |
| VAPA          | 1.109077985 | 0.0104518636  |
| GM2A          | 1.005405175 | 0.01058741719 |
| RAD9A         | 1.305442359 | 0.0105912549  |
| MEIOB         | 5.090568695 | 0.01064961141 |
| PHF7          | 1.178655745 | 0.01077870112 |
| SF3B6         | 1.299698683 | 0.01084435673 |
| HSPA4         | 1.157494729 | 0.01088991775 |
| UPP1          | 2.831806786 | 0.01090030194 |
| RP4-536B24.4  | 3.687087304 | 0.01091224381 |
| GPR157        | 1.555173699 | 0.01091927609 |
| FAM189B       | 1.18974639  | 0.01094929775 |
| DDX21         | 1.24954371  | 0.01096742447 |
| WT1-AS        | 2.909754676 | 0.0110624291  |
| RHEBL1        | 1.247967664 | 0.01113904435 |
| RP11-403I13.8 | 2.274308992 | 0.01115131042 |
| RP11-503E24.2 | 1.464539684 | 0.01116260243 |
| RAB4A         | 1.027069786 | 0.01119198074 |
| ZNHIT2        | 2.572180477 | 0.011284547   |
| SUGT1P1       | 1.941639646 | 0.01132040195 |
| CTB-32O4.2    | 2.07953376  | 0.01132040195 |
| NUDT10        | 2.240531042 | 0.01132728928 |
| ALKBH8        | 1.114900193 | 0.01146910437 |
| ACOT11        | 2.467434737 | 0.01154972144 |
| SLC29A3       | 1.60960267  | 0.01155285193 |
| BRD9P2        | 3.525458266 | 0.0115736808  |
| AC013268.3    | 4.407178048 | 0.0116057418  |
| AP001628.6    | 2.652537389 | 0.01166723233 |
| LINC01021     | 1.955564405 | 0.0116975285  |
| PAK4          | 1.497362863 | 0.0117030675  |
| ZNF485        | 1.603917783 | 0.0117030675  |
| RP11-122G18.1 | 1.750285823 | 0.0117030675  |
| AC034220.3    | 2.795064426 | 0.0117410892  |
| CLTB          | 1.220606303 | 0.01179654722 |
| MR1           | 2.05998565  | 0.01181950615 |
| RPL23A        | 1.009886092 | 0.01181950615 |
| RPL4          | 1.004875584 | 0.0118496327  |
| NFKBIE        | 1.137553129 | 0.0118580468  |
| FAM155B       | 3.459266388 | 0.011939212   |
| NDUFA13       | 1.81546263  | 0.01194748927 |
| PSTK          | 1.127310752 | 0.01195941578 |
| NBPF15        | 1.127673643 | 0.01195941578 |
| FABP6         | 4.357111374 | 0.01198826389 |
| AC092159.2    | 2.193511264 | 0.01210692174 |
| COMMD8        | 1.219897899 | 0.01213465645 |
| PPP1R14B      | 1.256467816 | 0.01215113757 |
| FMR1-AS1      | 3.142794257 | 0.0121972216  |
| GALNT18       | 2.476880593 | 0.01222787732 |
| UNC5CL        | 2.243079792 | 0.01223221056 |
| LMAN1         | 1.023409725 | 0.01224338129 |
| RP11-885N19.6 | 4.896083994 | 0.01226465106 |
| IQUB          | 2.230426676 | 0.01229921336 |
| CSPP1         | 1.075755792 | 0.01232382156 |
| LINC01970     | 2.18814385  | 0.01232382156 |
| UHRF1BP1L     | 1.090652884 | 0.01234487413 |
| PAOX          | 2.048870373 | 0.01237116143 |
| SH2D4A        | 2.630100743 | 0.01239851874 |
| TAP1          | 1.190263155 | 0.01240232959 |
| PRDX5         | 1.312170986 | 0.01246318459 |
| PRKCI         | 1.031567856 | 0.01252419199 |
| LURAP1L       | 2.174431828 | 0.01253368522 |

|               |              |                |
|---------------|--------------|----------------|
| DPP4          | -7.081551791 | 0.002187760254 |
| C5orf22       | -1.025136578 | 0.002193718997 |
| PRSS51        | -5.401632613 | 0.002200142887 |
| VPS13C        | -1.625226187 | 0.002209726013 |
| IQCK          | -1.413293854 | 0.002214891262 |
| PLEKHO1       | -1.56099081  | 0.002242453415 |
| CYP2U1        | -1.54916895  | 0.00225206805  |
| TTLL9         | -2.940491598 | 0.002267169685 |
| FZD3          | -2.056433612 | 0.002274488801 |
| GLYR1         | -1.030221614 | 0.00230004626  |
| WVOX          | -1.470254724 | 0.002302854937 |
| ZNRF2         | -1.744668359 | 0.002304038463 |
| STARD3NL      | -1.330645349 | 0.002308870484 |
| ZSCAN31       | -1.453863139 | 0.002312761048 |
| FCGR2B        | -5.301211227 | 0.002349666099 |
| ZNF418        | -1.190358746 | 0.002355097951 |
| KIF2A         | -1.442609524 | 0.002363777415 |
| LDLRAD4       | -2.851598509 | 0.002367170941 |
| CRYGS         | -1.571592478 | 0.002374161956 |
| SLC4A4        | -4.484513962 | 0.002394862033 |
| WRB           | -1.060185092 | 0.002396782596 |
| AC005083.1    | -5.100366778 | 0.002413394299 |
| ARPP19        | -1.185558463 | 0.002416539789 |
| MAG1          | -1.938859083 | 0.002418317121 |
| KLRA1P        | -1.388054194 | 0.002431490307 |
| PSPC1         | -1.382587729 | 0.002433042662 |
| CCDC50        | -1.836099372 | 0.002433042662 |
| CTC-255N20.1  | -5.90996629  | 0.002439508492 |
| RUNX1T1       | -6.997520152 | 0.002448828568 |
| ABHD13        | -1.602081948 | 0.002455075867 |
| SOSTDC1       | -5.408561818 | 0.002457337802 |
| B3GNT9        | -2.281263144 | 0.00247372978  |
| RP11-7F17.3   | -5.580193964 | 0.00247372978  |
| MACC1         | -3.274386347 | 0.002476659264 |
| MKL2          | -1.04636603  | 0.002478787465 |
| CARF          | -1.718585399 | 0.002492204581 |
| PMS2P5        | -2.158910434 | 0.002494399158 |
| GMPR          | -3.206833988 | 0.002515623008 |
| AVIL          | -3.53253046  | 0.002533511218 |
| SPPL2A        | -1.1827833   | 0.002553452309 |
| FMO5          | -3.417845396 | 0.002559959598 |
| CLEC1A        | -7.037307196 | 0.002565029261 |
| RP11-455F5.3  | -2.775083786 | 0.002586820684 |
| ATP2B2        | -5.266123504 | 0.002594676316 |
| TMSB4X        | -3.35187591  | 0.002612236842 |
| TBRG1         | -1.010654317 | 0.002622542545 |
| KIAA0391      | -1.305759089 | 0.002626274004 |
| AC104653.1    | -3.300505301 | 0.002628005199 |
| WDR33         | -1.143160043 | 0.002645485956 |
| GPRIN3        | -5.649765006 | 0.002645563332 |
| CLSTN2        | -5.721474439 | 0.002652297541 |
| IMPG2         | -2.933315649 | 0.002654360523 |
| FAM234B       | -1.454317713 | 0.002657696648 |
| LRRN4CL       | -5.21719     | 0.002665502428 |
| UBE2E1        | -1.162698735 | 0.002684419434 |
| ZBED3-AS1     | -1.506734757 | 0.00271888178  |
| RP11-196G18.3 | -3.786317056 | 0.002722278814 |
| TSHZ2         | -6.733312498 | 0.002724450858 |
| SMG6          | -1.280044418 | 0.002746806291 |
| AP000708.1    | -5.357866885 | 0.002751679981 |
| NRXN3         | -5.272801432 | 0.002761862418 |
| ATG9B         | -3.589388111 | 0.002778510077 |
| DNER          | -2.999847754 | 0.002783631869 |
| DGCR2         | -1.20415802  | 0.002786456208 |
| NOX4          | -3.833526622 | 0.00280134791  |
| AOAH          | -5.265812186 | 0.002819850895 |
| TMTC3         | -1.355298178 | 0.002832286109 |
| ATRN          | -1.048055287 | 0.002847404102 |

|               |             |               |               |              |                |
|---------------|-------------|---------------|---------------|--------------|----------------|
| METTL7B       | 2.219113569 | 0.01254948389 | APH1B         | -1.770994603 | 0.002847404102 |
| ZNF121        | 1.050329825 | 0.01254948389 | KANK2         | -1.675140318 | 0.002861384131 |
| ITGAD         | 4.718672953 | 0.01265679995 | MRM2          | -1.239198402 | 0.002862619913 |
| LACC1         | 2.317336734 | 0.01266671626 | ZNF638-IT1    | -1.964433573 | 0.002868869478 |
| RIPK4         | 3.742394763 | 0.01266671626 | PLEKHO2       | -1.235390528 | 0.002883267205 |
| PXK           | 1.10101024  | 0.01273246732 | KLHL32        | -2.678828179 | 0.002900675185 |
| LGI4          | 3.207732691 | 0.01274098655 | ZNF891        | -1.284413488 | 0.002908255704 |
| AC008592.3    | 4.691933851 | 0.01276109017 | FAM200A       | -1.172494878 | 0.002918172064 |
| EIF5A2        | 1.125817127 | 0.01276821164 | TMEM164       | -1.223446755 | 0.002918748577 |
| ANXA2R        | 1.368624168 | 0.0127717863  | OLFM3         | -6.870260521 | 0.002924637615 |
| KRTCAP2       | 1.029343212 | 0.01280530371 | RNF219        | -1.551291778 | 0.002944286573 |
| SCLT1         | 1.401555349 | 0.01282257651 | TBC1D3D       | -4.89079955  | 0.002962870257 |
| MPG           | 1.451553521 | 0.01288545546 | MGRN1         | -1.610982278 | 0.002998999055 |
| ANAPC11       | 1.453076968 | 0.012934033   | MUC12         | -5.749996543 | 0.003006732773 |
| NAA20         | 1.124383618 | 0.01294606321 | RP11-247A12.2 | -4.169126105 | 0.003010826868 |
| ATP5G3        | 1.513077704 | 0.01298827909 | COP22         | -3.444508501 | 0.003022518273 |
| SPATA13       | 1.041755525 | 0.01302649019 | NGRN          | -1.399211402 | 0.003043211262 |
| TRIM41        | 1.089862148 | 0.01306965592 | BAALC-AS2     | -5.621475819 | 0.003052205524 |
| CCNYL2        | 3.218215789 | 0.01309015325 | HIST1H3E      | -2.705513947 | 0.003073410086 |
| LINC01239     | 3.6509458   | 0.01310638174 | GABARAPL2     | -1.356573527 | 0.003078801489 |
| ISYNA1        | 1.591722281 | 0.01311051218 | MRPL32        | -1.070717167 | 0.003078801489 |
| ZCCHC7        | 1.531475121 | 0.01314366069 | GSG1L         | -5.655331607 | 0.003102433649 |
| CTD-2319112.2 | 2.33651796  | 0.01327537354 | DPY19L1P1     | -1.491951695 | 0.003106900844 |
| FAM3A         | 1.15564421  | 0.01331123808 | TG            | -5.16811765  | 0.00311883998  |
| HCG27         | 1.663921782 | 0.01331123808 | KRIT1         | -1.068110366 | 0.003123809116 |
| VNN1          | 4.279483881 | 0.01347063473 | TMEM253       | -2.741413488 | 0.003145646479 |
| NAPG          | 1.055555076 | 0.01349792432 | C7orf61       | -3.717244455 | 0.00314651588  |
| FLI1          | 1.814636051 | 0.0134981105  | ALG9          | -1.252130947 | 0.003147345933 |
| NDUFB7        | 1.724841999 | 0.01351498188 | ZKSCAN8       | -1.416130327 | 0.003157362787 |
| COL13A1       | 3.051250545 | 0.01356327445 | ADAM32        | -3.173090326 | 0.003159530003 |
| C2CD4C        | 2.615641019 | 0.01358591996 | MFSD9         | -1.349341051 | 0.003162814829 |
| TTC27         | 1.01618063  | 0.01381059306 | ZC3HC1        | -1.198346157 | 0.003176572458 |
| RAB12         | 1.451656382 | 0.01382833228 | GINS2         | -1.414972173 | 0.003183069205 |
| HYKK          | 2.240949091 | 0.01387365106 | LIFR          | -2.318622349 | 0.003191589008 |
| MAOA          | 1.636824515 | 0.01388672603 | RP11-620J15.1 | -5.318300474 | 0.003237995702 |
| FAM173A       | 1.790835965 | 0.01389986998 | TP53          | -1.484196512 | 0.003245564641 |
| SLC4A11       | 1.459091064 | 0.01396445195 | ZNF141        | -1.858099581 | 0.003260757943 |
| NPM3          | 1.100605149 | 0.0139785401  | AC097662.2    | -1.687064586 | 0.0032674624   |
| RP11-1398P2.1 | 4.229813996 | 0.01403510319 | CLCN2         | -1.577793902 | 0.00326854886  |
| MAPK13        | 1.818111434 | 0.01406113973 | RBBP4         | -1.015227957 | 0.00326854886  |
| LINC01881     | 1.198299415 | 0.01406693285 | PTOV1-AS1     | -1.975556696 | 0.003281406381 |
| IGF2          | 2.894109053 | 0.01406798947 | HIVEP3        | -2.754662634 | 0.003286301156 |
| AP000442.4    | 3.40471652  | 0.01410817025 | N4BP2         | -1.350727574 | 0.003290573016 |
| PPOX          | 1.082271124 | 0.01412079581 | LINC00601     | -3.655881329 | 0.003293974386 |
| CACYBP        | 1.491283369 | 0.01419799094 | TMEM51        | -2.307598675 | 0.003295663095 |
| ALDOC         | 3.500023866 | 0.0142321712  | WDR7          | -1.052464064 | 0.003313960837 |
| CDC42EP2      | 1.940784982 | 0.01427460765 | MGAT5         | -1.713395288 | 0.003319575422 |
| ACOT1         | 1.936027123 | 0.014304362   | AKT1          | -1.277894445 | 0.003332183403 |
| SIPA1         | 1.88859968  | 0.01432514328 | TUBB2BP1      | -4.758732598 | 0.003346107893 |
| VPS37C        | 1.229300215 | 0.01439310279 | ZBTB7C        | -5.577719834 | 0.003399716967 |
| HID1          | 1.562757589 | 0.01440175027 | SPATA22       | -5.151983746 | 0.003400853304 |
| GACAT2        | 3.202431636 | 0.01443440693 | NDFIP2        | -1.225079092 | 0.00340616981  |
| SNHG16        | 1.108452011 | 0.01444495472 | TRAF6         | -1.471911578 | 0.003406754276 |
| NTSR1         | 2.362662101 | 0.0144580115  | C9orf50       | -5.277628932 | 0.003419623425 |
| STN1          | 1.052906669 | 0.01453654082 | KLRK1         | -6.813386098 | 0.003438214437 |
| SCUBE1        | 5.086918573 | 0.01454779536 | ALAD          | -1.247897782 | 0.003497147531 |
| WHAMMP2       | 1.767897285 | 0.01455453445 | NUP210        | -1.497317033 | 0.003499844693 |
| LINC00882     | 2.586730527 | 0.0145691493  | FST           | -3.116680368 | 0.003507713563 |
| TWIST2        | 3.54078188  | 0.01460170189 | CMTM1         | -2.110482737 | 0.003530184084 |
| LINC00493     | 1.024922823 | 0.01460294371 | AC079584.3    | -5.146737373 | 0.003569273891 |
| SPERT         | 4.829518267 | 0.01464747894 | SP2           | -1.212603048 | 0.003572919198 |
| ATP23         | 1.064346127 | 0.01465495581 | ADD1          | -1.324669409 | 0.003595515826 |
| FLJ21408      | 1.739172781 | 0.01465495581 | ITGA2B        | -2.983063795 | 0.003598927211 |
| RSF1-IT1      | 2.226558023 | 0.01476475356 | BRSK1         | -1.497702774 | 0.003610092026 |
| DHRS11        | 1.102447309 | 0.01483763052 | LRRC3B        | -5.546849316 | 0.003628677402 |
| SRFBP1        | 1.217525587 | 0.01484868622 | RAB38         | -2.408044613 | 0.00363585349  |
| NR1D1         | 1.427238925 | 0.01491029533 | RP5-1024C24.1 | -5.999230278 | 0.003644599512 |
| LINC01572     | 1.39448343  | 0.0149485061  | ADAMTS9-AS2   | -5.996907911 | 0.003644678278 |

|               |             |               |               |              |                |
|---------------|-------------|---------------|---------------|--------------|----------------|
| FAM92A1P1     | 1.537147414 | 0.01497220412 | BTK           | -4.69252084  | 0.003654835156 |
| RP11-247L20.4 | 1.297895405 | 0.01499724708 | GNB4          | -1.994316203 | 0.003662183227 |
| MIF           | 1.836275922 | 0.01502694145 | WFDC1         | -4.69535704  | 0.003674131656 |
| RUSC2         | 1.17464369  | 0.01507705015 | ATP6V1G1      | -1.133491421 | 0.003686156411 |
| SBNO2         | 1.447993006 | 0.01511098396 | PCDHB9        | -3.203210781 | 0.003700407369 |
| CCZ1B         | 1.009681098 | 0.01511098396 | HERPUD2       | -1.239676053 | 0.003707479166 |
| S100A13       | 1.392327852 | 0.01521717001 | CNPY4         | -1.663794402 | 0.003707479166 |
| CHMP5         | 1.263280854 | 0.01524579701 | SEC14L5       | -4.376461958 | 0.003708139987 |
| GLIS3         | 2.245227673 | 0.01531899732 | ZFAND2A       | -1.817010382 | 0.003714018982 |
| EIF4A2        | 1.027788198 | 0.01535765521 | BEX2          | -5.066748804 | 0.003720183558 |
| GDF9          | 1.234405124 | 0.01542850194 | TEAD2         | -2.08855701  | 0.003726359863 |
| KLHL29        | 1.298807423 | 0.01544212058 | CHL1-AS2      | -5.65075024  | 0.003741768487 |
| RP11-482G13.1 | 4.725877673 | 0.01544297214 | ASB4          | -5.252805382 | 0.003742443548 |
| NCR3LG1       | 2.257380401 | 0.01550717836 | ABHD17C       | -2.535920025 | 0.003749303409 |
| PLAUR         | 2.13184167  | 0.0155146524  | TMED10        | -1.068832266 | 0.003776549229 |
| GNA15         | 3.586551437 | 0.01558921968 | EFCAB2        | -1.493264648 | 0.003777830725 |
| MUT           | 1.115681414 | 0.01568411776 | TRIM22        | -3.201786811 | 0.003809392918 |
| OXLD1         | 1.113127281 | 0.01570929141 | NECAB2        | -3.695586677 | 0.003821188309 |
| MFS10         | 1.631706667 | 0.01571849455 | C3orf62       | -1.202992092 | 0.003822747738 |
| SARDH         | 4.458753304 | 0.01578269765 | RP11-204L24.2 | -3.122698041 | 0.003824633773 |
| FAM175A       | 1.108223786 | 0.0158683899  | C14orf159     | -1.018135535 | 0.0038468482   |
| TOP1MT        | 1.130399805 | 0.01595215506 | TOR1B         | -1.205636552 | 0.0038468482   |
| BCAR3         | 2.544640885 | 0.01597247322 | HECTD4        | -1.04526215  | 0.003863815683 |
| XAB2          | 1.301967349 | 0.01598622458 | TOP3A         | -1.042855151 | 0.0038682073   |
| WNT4          | 3.129300295 | 0.01610828401 | EFTUD1P1      | -3.234812208 | 0.003874123523 |
| FAAP100       | 1.221033362 | 0.01613011237 | LINC00506     | -5.295590616 | 0.00387448858  |
| KCNJ14        | 1.658584444 | 0.01619642901 | SOD2          | -1.265259247 | 0.003877286368 |
| AC093732.1    | 4.611877005 | 0.01625136653 | COLQ          | -2.075582557 | 0.003894387102 |
| WASH2P        | 1.286103579 | 0.01628826123 | AMY2B         | -2.211568306 | 0.003894387102 |
| OSMR          | 4.93512791  | 0.01635436406 | GUCY1A3       | -5.988752041 | 0.003895413923 |
| FBXL2         | 1.808411585 | 0.01647970542 | BMS1P2        | -4.052098732 | 0.003901674228 |
| CEP89         | 1.412626602 | 0.01650476732 | ZNF268        | -1.958203452 | 0.003907286282 |
| SREBF1        | 1.511079099 | 0.01662573772 | STAT5A        | -3.313644331 | 0.003923227954 |
| RECQL4        | 1.431947871 | 0.0166434539  | TMOD1         | -3.398457435 | 0.003926137547 |
| FAM114A1      | 1.219219448 | 0.0167783071  | SH3BP2        | -2.246801789 | 0.003933020251 |
| UCK2          | 1.034370667 | 0.01679082456 | GF11B         | -3.727546609 | 0.003950897647 |
| ULBP1         | 3.129786652 | 0.01684234547 | ZNF91         | -2.985322129 | 0.003950897647 |
| ZFPM2-AS1     | 2.865300646 | 0.01698869866 | PSKH1         | -1.449828295 | 0.003954404804 |
| MAPKAPK3      | 1.584800926 | 0.0170506469  | NCS1          | -1.477361497 | 0.004010450174 |
| GRK6          | 1.100039681 | 0.01705819225 | PLLP          | -2.169383487 | 0.004015854903 |
| STC1          | 2.420088322 | 0.01735882349 | TBCE          | -1.388628023 | 0.004059057399 |
| KLK1          | 3.400247202 | 0.01737274577 | SLC25A40      | -1.147453659 | 0.004064043798 |
| FBXO32        | 1.69479155  | 0.01739309656 | NDUFA9        | -1.189861271 | 0.004103782492 |
| DUSP2         | 2.573539817 | 0.01744102166 | RGMA          | -3.452668704 | 0.004103782492 |
| ELOVL4        | 1.861673353 | 0.01781338723 | CA12          | -2.935371191 | 0.004112074955 |
| RP11-535M15.2 | 3.929105412 | 0.01787343677 | POLDIP3       | -1.1845829   | 0.00411630455  |
| NOS3          | 3.876076561 | 0.01790888322 | SLC25A34      | -2.793612554 | 0.004122196302 |
| C10orf25      | 2.148915277 | 0.01794711604 | CEMIP         | -6.080204997 | 0.004129390959 |
| BMP4          | 1.221114222 | 0.01794855886 | DGCR8         | -1.271239475 | 0.004165638026 |
| RP3-467K16.4  | 2.82104963  | 0.01807675308 | FSBP          | -3.788140782 | 0.004167144363 |
| TOX2          | 1.841117966 | 0.01826355756 | RPS27L        | -1.163187218 | 0.004197117081 |
| AC145343.2    | 3.750887357 | 0.01832311228 | EIF1AX        | -1.34560509  | 0.004202077406 |
| ALG10         | 1.193737109 | 0.01840696425 | RP11-429G19.3 | -5.180231863 | 0.004224718689 |
| TTC6          | 4.235383389 | 0.0184246866  | LHFP          | -2.745093962 | 0.004227378322 |
| AC002076.10   | 3.84241051  | 0.01842606347 | ELOVL2-AS1    | -5.065880739 | 0.004229916802 |
| RP11-134G8.7  | 1.650136783 | 0.01842740977 | LRRC37A3      | -2.799352769 | 0.004236224549 |
| HSPA4L        | 1.167002966 | 0.0185318009  | DDX56         | -1.259142347 | 0.00424171754  |
| EVA1B         | 2.989108463 | 0.01854690629 | ZNF423        | -4.874175865 | 0.00426192226  |
| HAUS4         | 1.0448497   | 0.01855474263 | ACSF2         | -1.254972269 | 0.004279685898 |
| EFR3A         | 1.351535902 | 0.01857446034 | PER3          | -1.903743332 | 0.004294537408 |
| IMPDH2        | 1.068117651 | 0.01861473125 | RCBTB1        | -1.066634271 | 0.004303880939 |
| FAM208A       | 1.166974884 | 0.0186427278  | RP11-281O15.4 | -5.048132452 | 0.004303880939 |
| GLIPR1L2      | 1.692223458 | 0.01872135097 | GPBP1         | -1.335598319 | 0.004324841391 |
| ANAPC10       | 1.022415053 | 0.01885973881 | GAB2          | -1.502713089 | 0.004325200767 |
| PSEN2         | 1.393372932 | 0.01888964793 | FBXO41        | -1.187585919 | 0.004325200767 |
| CGN           | 1.255766417 | 0.01890152822 | IGDCC3        | -2.949762438 | 0.004336012166 |
| ATP6V1B1-AS1  | 3.433189361 | 0.01890187137 | MAEL          | -5.464500876 | 0.004338551551 |
| IGF2BP1       | 4.685445109 | 0.01894746024 | FAM117B       | -1.563920686 | 0.004359959699 |



|                |             |               |               |              |                |
|----------------|-------------|---------------|---------------|--------------|----------------|
| FAM86HP        | 1.751332613 | 0.01896799307 | ZNF391        | -1.385817452 | 0.004364708063 |
| LDLR           | 1.241552419 | 0.01911814173 | ADPRH         | -5.433206133 | 0.004368055373 |
| NDUFV2         | 1.586314944 | 0.01918657031 | DISP3         | -2.169585591 | 0.004377850978 |
| RP11-650K20.3  | 3.615188719 | 0.01921205146 | GPR173        | -1.703163255 | 0.00440903211  |
| LRFN4          | 1.592714353 | 0.01921625364 | ANKRD10-IT1   | -1.541373901 | 0.004425009632 |
| LINC02057      | 4.121472717 | 0.01929912714 | LINC00877     | -5.162567193 | 0.004430997495 |
| TMA16          | 1.194177342 | 0.01931921015 | BLOC1S2       | -1.091436053 | 0.004435476071 |
| CCNO           | 2.057851353 | 0.01934800273 | PNMA3         | -4.283594923 | 0.004451324321 |
| RP11-677M14.3  | 3.392028617 | 0.01952092811 | ZDHH3         | -1.015206125 | 0.004460942112 |
| HECA           | 1.06119965  | 0.01963206607 | IKBKE         | -2.583830452 | 0.00446594411  |
| THOC1          | 1.006603965 | 0.01964208744 | LMAN2L        | -1.398350486 | 0.004470000054 |
| PTER           | 4.609702103 | 0.01970721479 | TMEM176A      | -5.895689635 | 0.004528325101 |
| AC106786.1     | 4.191157465 | 0.01977993331 | LINC00606     | -5.915208686 | 0.004529393032 |
| PCLO           | 2.516770863 | 0.01989108627 | DACT3-AS1     | -4.634377855 | 0.004559218413 |
| EPHB6          | 4.067710728 | 0.01992255906 | STRIP1        | -1.069424467 | 0.00457864508  |
| PCGF5          | 1.304516557 | 0.01998900498 | IFT81         | -1.152316531 | 0.004582483218 |
| SLIT2          | 2.562782214 | 0.02002261143 | LINC00205     | -1.177100916 | 0.00459041247  |
| CCDC71L        | 1.213161228 | 0.02002261143 | PLCB2         | -4.620534843 | 0.0045964445   |
| PIK3CG         | 4.336444541 | 0.020048825   | CUX1          | -1.119175674 | 0.004604822623 |
| RABEPK         | 1.007530426 | 0.02016004222 | AGAP1         | -1.972480215 | 0.004616489308 |
| BCAR1          | 1.687367185 | 0.02021182386 | ARID5B        | -2.115980148 | 0.004640907386 |
| CH507-154B10.1 | 1.455764363 | 0.02028470541 | MGP           | -5.119008872 | 0.004658574498 |
| CTD-2337A12.1  | 4.537149604 | 0.02032954731 | LRIG2         | -1.142181047 | 0.004663445946 |
| TNKS1BP1       | 1.485608127 | 0.02040811731 | EVI5          | -1.39108446  | 0.004666592538 |
| VARS           | 1.143985836 | 0.02052514182 | ZNF322        | -1.195794908 | 0.004666592538 |
| EEF2           | 1.180576562 | 0.02058990351 | TRIM13        | -1.082299016 | 0.004672968424 |
| WASHC1         | 1.102188977 | 0.0207091044  | AFF3          | -4.850708475 | 0.004683221846 |
| TBX19          | 1.586289407 | 0.02071502199 | ZNRF1         | -1.083219305 | 0.004684760128 |
| FAM86C1        | 1.275477784 | 0.02080754254 | RPRD1A        | -1.049058634 | 0.004705397279 |
| LINC02086      | 2.70406007  | 0.0208398748  | PGM5P4        | -5.473616854 | 0.004726158734 |
| HPRT1          | 1.491272772 | 0.02111368115 | ASAP3         | -1.798129361 | 0.00473771552  |
| VASP           | 1.087737242 | 0.02118515044 | MGAM          | -3.875615188 | 0.004741665923 |
| RP3-460G2.2    | 2.392090466 | 0.02127348231 | IFNAR1        | -1.118767274 | 0.004742904452 |
| GADD45GIP1     | 1.207094011 | 0.02148357022 | TJP1          | -1.630312674 | 0.004748682988 |
| PRPS2          | 1.300665286 | 0.02152290263 | MAPT          | -1.08660315  | 0.004757739311 |
| CEP57L1        | 1.105833171 | 0.02166298656 | C6orf89       | -1.0134314   | 0.004815699227 |
| ITGB2-AS1      | 4.593664851 | 0.0216808998  | TMEM184C      | -1.025054577 | 0.004817898663 |
| RHBDL1         | 2.500206027 | 0.02171493037 | STAG3L3       | -1.758547837 | 0.004817898663 |
| DUSP10         | 1.36033127  | 0.0218259368  | ZNF763        | -2.878455955 | 0.004817898663 |
| SEMA6A-AS1     | 1.611079106 | 0.02188255209 | TRAK2         | -1.842841422 | 0.004852126212 |
| UBE2S          | 1.394583147 | 0.02194888456 | DNMT3A        | -1.269829176 | 0.004865294804 |
| DLGAP2         | 4.52102113  | 0.02195686522 | MRPL57        | -1.408108246 | 0.004880726723 |
| MYLK           | 1.500267615 | 0.02198623706 | POTEE         | -1.632164519 | 0.004929574104 |
| NKX6-1         | 2.950053556 | 0.02199967924 | HHATL         | -5.354682809 | 0.004949183226 |
| TMEM267        | 1.174500718 | 0.02200779639 | MTHFSD        | -1.160669355 | 0.004956092823 |
| RPL21          | 1.16409132  | 0.02213664948 | KLHDC10       | -1.045219994 | 0.004961398181 |
| AJUBA          | 1.700124755 | 0.02217522739 | GPR12         | -5.213071627 | 0.004963393387 |
| RP11-286H14.4  | 1.271120736 | 0.02221796274 | KMT2E         | -1.203849336 | 0.004965091321 |
| RP11-14N7.2    | 4.478142569 | 0.02225577315 | SLC39A6       | -1.466502006 | 0.004991306023 |
| OR2L13         | 4.477934074 | 0.02225733432 | SOCS6         | -1.404263663 | 0.005019916908 |
| ZNF404         | 3.215989816 | 0.02230053156 | ZNF84         | -1.253175728 | 0.005026043336 |
| CTC-338M12.4   | 1.275170231 | 0.02234600247 | ATP6V0D1      | -1.286942125 | 0.005062311635 |
| RP11-297A16.2  | 4.19827412  | 0.02245840739 | EXTL3         | -2.476230764 | 0.005104970887 |
| FAM110D        | 2.097575172 | 0.02249236466 | TAF1A-AS1     | -1.711780788 | 0.005107535178 |
| RP11-84D1.1    | 4.552179696 | 0.02250465587 | MMP15         | -1.877414676 | 0.005118873902 |
| TTC7A          | 1.236208095 | 0.02253544339 | APP           | -1.88228629  | 0.005137694534 |
| LRP5           | 1.356248105 | 0.02254183327 | ASCL1         | -6.422209399 | 0.005145285726 |
| PRKCQ-AS1      | 1.210084497 | 0.02254512085 | EBF4          | -2.348431562 | 0.00523631933  |
| NFKBIL1        | 1.388376684 | 0.02264509758 | RP11-758P17.2 | -3.714195116 | 0.00523631933  |
| COL4A4         | 2.247917666 | 0.02269664849 | LINC02001     | -1.277770011 | 0.005245208224 |
| CAMKK1         | 2.098885569 | 0.02307761215 | WNK3          | -1.224242877 | 0.005272581938 |
| SHB            | 1.408419158 | 0.02317633592 | STRADB        | -1.45114737  | 0.005282551095 |
| FAM117A        | 1.188743276 | 0.02318523575 | SCAMP5        | -1.747422611 | 0.005298695264 |
| AP001372.2     | 1.140514682 | 0.02328766813 | ST7           | -1.361638941 | 0.005310336115 |
| ERN1           | 1.04968285  | 0.02331227598 | RP4-625H18.2  | -4.934561949 | 0.005310336115 |
| RNF32          | 2.667459828 | 0.02334372343 | EMILIN1       | -3.364557113 | 0.005315343912 |
| AC053503.4     | 2.784715264 | 0.02356068188 | DIRAS3        | -3.872198124 | 0.005327635563 |
| SOCS2-AS1      | 2.678361743 | 0.02356068188 | SFRP4         | -5.279322847 | 0.005387453413 |

|                |             |               |               |              |                |
|----------------|-------------|---------------|---------------|--------------|----------------|
| EPOR           | 1.607168607 | 0.02369126955 | CINP          | -1.431986774 | 0.005409339547 |
| MIR4500HG      | 3.170335241 | 0.02370021912 | CCT6P3        | -1.35492557  | 0.005435119535 |
| LIPA           | 1.489928127 | 0.02374382983 | ATE1-AS1      | -2.633969664 | 0.005454328544 |
| RB1CC1         | 1.242945521 | 0.02377184471 | MRPS31P5      | -1.635780829 | 0.005466152176 |
| USH1G          | 3.502674536 | 0.02387122837 | SERPING1      | -5.394287071 | 0.005470351194 |
| LLGL2          | 3.468753111 | 0.02387366844 | RAB11B-AS1    | -2.034888011 | 0.005484735777 |
| DMBX1          | 3.059766211 | 0.02403996129 | RP11-216B9.9  | -3.234881605 | 0.00551751757  |
| PFAS           | 1.077632119 | 0.02410976757 | SLC44A2       | -1.871872122 | 0.005544398093 |
| RPL29          | 1.20357207  | 0.02450292679 | SLC4A2        | -1.574651094 | 0.005547422294 |
| ENGASE         | 1.344762342 | 0.02455274659 | RP11-136C24.3 | -5.298529017 | 0.005547422294 |
| RASL11A        | 1.871102945 | 0.02460933712 | SPATA42       | -5.071871399 | 0.005567303863 |
| CTD-2540B15.11 | 3.480146378 | 0.02462087006 | GPR153        | -1.727413411 | 0.005579646203 |
| SLC19A2        | 1.446280035 | 0.02463571257 | NCKAP5L       | -1.303268217 | 0.005617076307 |
| HELZ2          | 1.626916829 | 0.02472205589 | BTN2A3P       | -1.727781991 | 0.005643170577 |
| GOLGA3         | 1.029643975 | 0.02472449783 | RBMS3-AS3     | -2.808902002 | 0.005653211982 |
| TCEA1          | 1.021016919 | 0.02475288636 | LTK           | -3.388892373 | 0.005681758137 |
| TXNRD2         | 1.460290662 | 0.02475964209 | GNG3          | -5.027208951 | 0.005684921355 |
| FAM166B        | 3.24192301  | 0.02476612505 | ZNF561        | -1.101989568 | 0.005696688325 |
| RP11-122K13.12 | 1.829609781 | 0.02484619539 | TMSB15A       | -1.702155627 | 0.005715438568 |
| RBKS           | 1.814333277 | 0.02484654259 | PTGER4P2-CDK  | -2.953415243 | 0.005780874326 |
| LARP1B         | 1.141526501 | 0.02490957687 | ZNF580        | -1.214847721 | 0.00581547482  |
| HSD17B1        | 1.85547278  | 0.02491647428 | RP11-620J15.4 | -4.943769079 | 0.00581547482  |
| CASP8          | 2.371285742 | 0.02496524068 | CXXC5         | -2.221080117 | 0.005823144848 |
| UGCG           | 1.291875187 | 0.02500634755 | YBEY          | -1.207543828 | 0.005829622156 |
| LTBP4          | 1.425418433 | 0.0250517973  | PKD1L1        | -2.745934646 | 0.005834575571 |
| RP11-736K20.5  | 2.270516973 | 0.02522601544 | C11orf49      | -1.685126938 | 0.005878006534 |
| DDO            | 2.732498667 | 0.02524786372 | DZANK1        | -1.213273265 | 0.005928809403 |
| ARAP3          | 2.200094909 | 0.02526481134 | ARHGDI        | -5.322135219 | 0.005944883797 |
| RP11-423H2.3   | 2.618659719 | 0.02526481134 | CIART         | -1.872670573 | 0.005952085852 |
| NHP2           | 1.190595491 | 0.02529063821 | PTGFRN        | -3.442098665 | 0.005964505308 |
| PRORS1P        | 2.69412074  | 0.02543442697 | TMX1          | -1.259130896 | 0.005964505308 |
| TXNRD1         | 1.49172468  | 0.02544450274 | KIAA1755      | -3.416720388 | 0.00599194589  |
| RAB1B          | 1.181542574 | 0.0254483105  | ITGB1BP2      | -1.65738193  | 0.006026702556 |
| MIOX           | 4.449188315 | 0.02557995605 | SNCAIP        | -2.928106546 | 0.006030695839 |
| GOLGA2P7       | 2.857246491 | 0.02558465875 | CENPF         | -1.33805948  | 0.006030695839 |
| YJEFN3         | 1.470108105 | 0.02561824967 | C6orf141      | -5.129777171 | 0.006036570855 |
| CNBD2          | 1.056901655 | 0.025642613   | GTF2IRD1      | -1.792596473 | 0.006063890623 |
| THSD4          | 3.086262806 | 0.025642613   | TMEM216       | -3.434415906 | 0.006073305984 |
| REEP5          | 1.157430091 | 0.02576280535 | GRK5          | -1.485800323 | 0.006098625766 |
| RP11-297N6.4   | 3.098554344 | 0.02583155998 | AASS          | -1.460635917 | 0.006107761749 |
| ST6GALNAC2     | 2.699145091 | 0.02589483178 | LINC01977     | -5.32261339  | 0.006111137619 |
| PML            | 1.021428802 | 0.02594461184 | NEDD4L        | -1.248186939 | 0.006136482573 |
| ADGRE2         | 2.634192958 | 0.0259800486  | EBF1          | -3.85546155  | 0.006140889725 |
| RP13-455A7.1   | 4.448132981 | 0.02606312664 | SDC3          | -2.259838459 | 0.006150186689 |
| AC012358.4     | 4.444920068 | 0.02616117794 | RP11-241F15.1 | -4.700815893 | 0.006161049313 |
| RP1-266L20.2   | 4.485001717 | 0.0262392154  | CLSPN         | -1.495364896 | 0.006189936577 |
| AC116609.2     | 2.735095742 | 0.02625603682 | RP11-110I1.12 | -2.361724833 | 0.006242885529 |
| RP11-89K11.1   | 3.443333393 | 0.02625755707 | HARBI1        | -1.136532334 | 0.006268883221 |
| C4orf50        | 4.712446567 | 0.02630366597 | GRIA1         | -4.638861346 | 0.006283049894 |
| GAA            | 1.240166167 | 0.0264254815  | DICER1        | -1.036318558 | 0.006300467461 |
| MOV10L1        | 4.444118524 | 0.02649441971 | ZEB2-AS1      | -4.099506045 | 0.006310215433 |
| MRPL4          | 1.306785942 | 0.02651802535 | ZMYND11       | -1.033284575 | 0.006310351727 |
| C1RL           | 1.429504006 | 0.02653790596 | RNF41         | -1.054053974 | 0.006322627221 |
| MRPS35         | 1.005748141 | 0.02664116115 | LRRC37B       | -1.151313638 | 0.006355494958 |
| DLC1           | 1.317641176 | 0.02668564577 | RP4-635E18.8  | -2.277617836 | 0.006381108126 |
| EBF2           | 3.605722265 | 0.02671588276 | LINC01778     | -2.722293474 | 0.006404109579 |
| E2F8           | 1.031957423 | 0.02674096747 | KLRC2         | -6.228398516 | 0.006410093941 |
| FGF17          | 3.981645443 | 0.02704254102 | CCT6B         | -2.03058941  | 0.006428037019 |
| RPS18          | 1.143236991 | 0.02704254102 | ALOX12P2      | -5.095230955 | 0.006447121808 |
| UBXN6          | 1.338209262 | 0.02742119653 | GDF7          | -5.293838915 | 0.00645975598  |
| CCDC62         | 1.469654237 | 0.02749417207 | OAZ2          | -1.187357799 | 0.006499035546 |
| ADAM15         | 1.068667253 | 0.02750839065 | KIF21A        | -1.865969966 | 0.00651053706  |
| KCND1          | 1.648977835 | 0.02758436408 | C6orf62       | -1.127655932 | 0.006545012497 |
| SH2D3C         | 3.584609517 | 0.02760236855 | GPR135        | -1.161234495 | 0.006565965774 |
| SLC25A35       | 1.069666021 | 0.0276067638  | CACNA1D       | -4.457495342 | 0.006569160096 |
| CTC-453G23.8   | 2.202087822 | 0.02768265983 | JMJ1C         | -1.082624334 | 0.006579413059 |
| DNAJC5G        | 2.738367277 | 0.02769752914 | NIFK-AS1      | -1.50979     | 0.006581792306 |
| SLC29A4P2      | 4.505728154 | 0.02788244635 | PLXNA2        | -3.707638384 | 0.006618121071 |

|               |             |               |               |              |                |
|---------------|-------------|---------------|---------------|--------------|----------------|
| IL27RA        | 1.972693484 | 0.02801953559 | PODN          | -5.717730119 | 0.006634694516 |
| HSP90AB2P     | 1.286271622 | 0.02809119485 | LINC01089     | -1.256446448 | 0.006649216337 |
| ELFN1         | 2.717904802 | 0.02817111397 | PCDHA3        | -5.707672322 | 0.006655107343 |
| CTB-131B5.5   | 1.750013657 | 0.02837920971 | RAP2A         | -2.388459348 | 0.006668303842 |
| FRA10AC1      | 1.122346196 | 0.02849619811 | FIGN          | -1.310633238 | 0.006685984479 |
| TLR5          | 2.220447221 | 0.02860894651 | RERE          | -1.189308685 | 0.006706069916 |
| RP11-77P6.2   | 1.167662649 | 0.02866036952 | SLC25A33      | -1.04901577  | 0.006754455841 |
| RP11-235E17.6 | 2.055833607 | 0.02879479414 | AGK           | -1.222104795 | 0.006760970495 |
| CNBD1         | 2.968543564 | 0.02881649906 | FKBP14        | -1.343572894 | 0.006764061764 |
| ST20          | 1.093934916 | 0.02882289017 | MYO18A        | -1.18297083  | 0.006777988076 |
| C11orf70      | 1.875325323 | 0.02886202535 | CDK5R1        | -1.701945974 | 0.006852079505 |
| MKNK2         | 1.110012591 | 0.02886266936 | OLFML2A       | -3.143219955 | 0.006855833043 |
| FAM53A        | 2.620544423 | 0.02886469305 | CNIH3         | -1.982384192 | 0.00687410851  |
| JAG2          | 1.877050586 | 0.02900291738 | GLS           | -1.265784768 | 0.006881038643 |
| EBLN3P        | 1.252644577 | 0.02907481304 | SELENOV       | -5.256844569 | 0.006881038643 |
| RPL13P5       | 1.432700187 | 0.0292484033  | CHD7          | -1.219221779 | 0.006911578283 |
| TMLHE-AS1     | 3.187322844 | 0.02935365836 | FERMT3        | -2.510695406 | 0.006921858627 |
| NDST3         | 4.420464372 | 0.02943598537 | C2orf66       | -4.315048385 | 0.006934827397 |
| RP11-402G3.3  | 4.417007063 | 0.02959428294 | TMBIM4        | -1.036313056 | 0.006941580647 |
| APBA3         | 1.104362129 | 0.02964744196 | C1QTNF1       | -2.224858531 | 0.006969056909 |
| CDC42BPG      | 3.249485587 | 0.02964744196 | DGUOK         | -1.026493349 | 0.006999614181 |
| MFSO13A       | 1.287378137 | 0.02965218063 | AC091133.1    | -1.942806565 | 0.007032716316 |
| SNHG12        | 1.162502945 | 0.0297142304  | CNTLN         | -1.707947443 | 0.00709396116  |
| RP11-54C4.3   | 1.722094744 | 0.02973853888 | FAM110B       | -1.90209877  | 0.007127110212 |
| TMEM145       | 1.089310047 | 0.03012363356 | TMEM80        | -1.310460343 | 0.007157746281 |
| DUS1L         | 1.350888534 | 0.03015202888 | NOP14-AS1     | -1.292889805 | 0.0071673344   |
| GATA6-AS1     | 3.995721576 | 0.03019054622 | ZNF841        | -1.641010051 | 0.007209203249 |
| MSLNL         | 4.414125529 | 0.03030087138 | TRIM67        | -4.97399557  | 0.007222763671 |
| RP3-467K16.7  | 4.411508278 | 0.03040004781 | ATG2B         | -2.122035986 | 0.007314229283 |
| DPP7          | 1.603242981 | 0.03045632509 | MINDY3        | -1.208613357 | 0.007328234251 |
| TUT1          | 1.072338265 | 0.03057907622 | GABPB1-AS1    | -1.12794287  | 0.007344285083 |
| TMEM9B-AS1    | 1.529967684 | 0.03058264342 | ZNF518A       | -1.091974294 | 0.007385267707 |
| TCTE1         | 3.942206796 | 0.03062300989 | SDK2          | -4.777173557 | 0.007422900564 |
| NAT6          | 1.053434812 | 0.03062300989 | PCDHGB2       | -3.160451764 | 0.007422900564 |
| STAR4-AS1     | 1.96123643  | 0.03065540496 | OLFM1         | -6.227339927 | 0.007442543374 |
| NACAP1        | 1.034900651 | 0.0307217102  | DISP1         | -1.790612397 | 0.007464342372 |
| SLC2A4RG      | 1.213604184 | 0.03077495083 | LINC01816     | -4.92710743  | 0.00747520279  |
| ARL2          | 1.333342336 | 0.03101619364 | ABCC9         | -5.719689475 | 0.007479423969 |
| RP11-501C14.5 | 4.024117001 | 0.03129581396 | RHOBTB1       | -1.365892438 | 0.007487304493 |
| CRYM-AS1      | 2.390710586 | 0.03146325358 | RP11-282O18.3 | -1.395987859 | 0.007566092326 |
| CAMTA2        | 1.011549198 | 0.03148317724 | DPY19L1       | -1.162918818 | 0.007671262437 |
| SLC29A2       | 2.729380933 | 0.03156376466 | UCP2          | -1.582867376 | 0.007671262437 |
| MCMDC2        | 3.536732217 | 0.03159987824 | ETV5          | -1.430772337 | 0.00768203319  |
| CYP39A1       | 2.849863087 | 0.03162380654 | DUSP15        | -1.945630796 | 0.007689829314 |
| POLB          | 1.710448332 | 0.03165134489 | MFSD5         | -1.491431773 | 0.007689829314 |
| ADAMTS12      | 3.197889811 | 0.03165134489 | AC004893.11   | -1.505077532 | 0.00774465452  |
| GPAT3         | 3.317589671 | 0.03169334889 | TFDP1         | -1.671615367 | 0.007794169846 |
| HERC2P10      | 2.652305393 | 0.03175654797 | ANKRD45       | -3.236919385 | 0.007803202587 |
| TSPAN4        | 1.47852995  | 0.03182322762 | MUTYH         | -1.087860648 | 0.007820749729 |
| RP11-239A17.1 | 4.321337041 | 0.0318658036  | SLC6A16       | -2.079988901 | 0.007836097101 |
| FOXC2-AS1     | 4.53987788  | 0.0319408992  | GTF3C6        | -2.08547215  | 0.007846086901 |
| OXTR          | 1.969510352 | 0.03204349082 | ARL4A         | -1.808872899 | 0.007965219414 |
| PIEZO1        | 1.152245111 | 0.03217150924 | NR2E1         | -4.998425318 | 0.008078625944 |
| WASH5P        | 1.55629634  | 0.032183519   | CHRNA4        | -5.67091649  | 0.008107543827 |
| SLC16A6       | 1.889646526 | 0.03223780035 | RP11-277P12.9 | -4.971186188 | 0.008118670935 |
| UNC5A         | 2.900876876 | 0.03231884527 | SLC30A1       | -1.043399911 | 0.008135180032 |
| BCRP7         | 4.434811519 | 0.03239631346 | BCL2L15       | -3.02854094  | 0.008137511493 |
| BCL2L12       | 1.036374197 | 0.03262397763 | POR           | -1.608275558 | 0.008145464157 |
| LYSMD3        | 1.146260471 | 0.03265971689 | CASP3         | -2.007195593 | 0.008183761794 |
| MCRIP2        | 1.157305055 | 0.03284819752 | LINC01833     | -5.271226429 | 0.008201056469 |
| IRAK1         | 1.029966    | 0.03286665052 | THAP5         | -1.078117063 | 0.008204994159 |
| RASD2         | 2.249821986 | 0.03296000835 | ERVK13-1      | -1.346821894 | 0.008245782331 |
| UBE2W         | 1.104073456 | 0.03299355355 | BMPR1A        | -1.449981754 | 0.008262197588 |
| WFDC21P       | 4.438280554 | 0.03299355355 | KIAA1549      | -1.228877654 | 0.00827401152  |
| LINC02210     | 1.019602373 | 0.03303933055 | CDK6          | -2.460414467 | 0.008276424262 |
| ERGC2         | 1.046840657 | 0.03304121069 | TYW5          | -1.089644667 | 0.008303749361 |
| OTUD6B-AS1    | 1.051572853 | 0.03304121069 | COMMD9        | -1.216817124 | 0.008340096915 |
| AP001258.4    | 1.046833372 | 0.03309785096 | DNAJB2        | -1.039933749 | 0.008352247292 |

|                |             |               |
|----------------|-------------|---------------|
| ARHGAP22       | 1.852843606 | 0.033131005   |
| RP11-95P2.3    | 4.311069376 | 0.033131005   |
| FBXL17         | 1.251150204 | 0.03314059298 |
| ABC7-42389800  | 1.064830219 | 0.0333193869  |
| RP11-497E19.1  | 4.428545803 | 0.03337487315 |
| RP5-901A4.1    | 1.916525277 | 0.03360784306 |
| PICK1          | 2.541143568 | 0.03361843736 |
| CRLF3          | 1.162553519 | 0.03363422176 |
| FBXO24         | 1.407262694 | 0.03379967997 |
| SP140          | 2.069142568 | 0.03385740527 |
| SNX29P1        | 4.040861205 | 0.03386266392 |
| LRGUK          | 2.291963264 | 0.03390716001 |
| ZMYND15        | 2.453982143 | 0.03391007681 |
| THOC6          | 1.169586913 | 0.0339520237  |
| PSMD6-AS2      | 1.072555648 | 0.03431800531 |
| RP11-351I24.1  | 2.562296038 | 0.03437842433 |
| ZNF569         | 1.016084274 | 0.03452300258 |
| CDC26          | 1.003115016 | 0.03457984822 |
| DDX54          | 1.052762139 | 0.03464229929 |
| ESYT3          | 2.023447446 | 0.0346486406  |
| MAGEB3         | 4.302391807 | 0.03473447582 |
| NOA1           | 1.181236046 | 0.03473473425 |
| SDF2L1         | 1.509234598 | 0.03507454094 |
| ALKBH7         | 1.708166414 | 0.03513903195 |
| PEX3           | 1.101002375 | 0.03515749002 |
| RP11-888D10.3  | 2.41165358  | 0.03533741854 |
| RP11-366F6.2   | 4.34276227  | 0.03550164201 |
| RUVBL2         | 1.281350723 | 0.03551359427 |
| RCCD1          | 1.821092189 | 0.03554808692 |
| BMS1P10        | 2.802872297 | 0.03567976326 |
| ANKRD37        | 1.659281687 | 0.0357312581  |
| SELENOH        | 1.470682877 | 0.03583679679 |
| RP11-1228E12.1 | 1.830938095 | 0.03593843095 |
| RAB3IL1        | 1.574331572 | 0.03605493733 |
| TRAM2          | 1.155605364 | 0.03608807348 |
| TK1            | 1.326923442 | 0.03611814988 |
| IGSF8          | 1.164869832 | 0.03614910135 |
| HERC2P3        | 1.978943424 | 0.03620001818 |
| ROPN1B         | 4.105995045 | 0.03620890119 |
| PUS1           | 1.23610431  | 0.03622741263 |
| CHIC1          | 1.314888946 | 0.0362703262  |
| RP13-895J2.3   | 3.993426306 | 0.03644455666 |
| GSTO1          | 1.028699177 | 0.03657556116 |
| TMEM190        | 4.368570096 | 0.03700932462 |
| BFSP1          | 1.947666971 | 0.03723757524 |
| PTK6           | 3.41126913  | 0.03731249048 |
| RIBC2          | 2.018656952 | 0.03749598744 |
| RTN4R          | 2.274178385 | 0.03751848322 |
| RP11-406H4.1   | 4.286387948 | 0.03756156167 |
| CTD-2341M24.1  | 1.475568801 | 0.03769661099 |
| TKT            | 1.141137656 | 0.0377038072  |
| ZNF318         | 1.100741946 | 0.03784257957 |
| CCNE1          | 1.359604972 | 0.03822066458 |
| AC092168.2     | 3.869228131 | 0.03823486444 |
| GMD5           | 1.60585824  | 0.03824853784 |
| F2RL1          | 3.143916323 | 0.03850898767 |
| ADAT2          | 1.5829078   | 0.03850898767 |
| PPP2R5D        | 1.029706322 | 0.03857188783 |
| SCOC-AS1       | 1.415130662 | 0.0385734574  |
| RP11-551L14.4  | 2.068696538 | 0.03878982026 |
| C19orf33       | 4.23279734  | 0.03881257332 |
| HLA-V          | 3.181607782 | 0.03884900345 |
| CSF3           | 4.273837827 | 0.03888023559 |
| TMEM161A       | 1.158196105 | 0.03903221258 |
| GMIP           | 1.243604304 | 0.03907621375 |
| VEPH1          | 2.564739522 | 0.03915655096 |
| ARL13A         | 4.270617367 | 0.03934339155 |
| LINP1          | 3.012624307 | 0.03934463347 |

|               |              |                |
|---------------|--------------|----------------|
| BTD           | -1.109892061 | 0.008352247292 |
| ACTN2         | -3.088266622 | 0.008359029552 |
| RAPGEF5       | -2.78974019  | 0.008447942644 |
| RP11-472N13.2 | -4.464710927 | 0.008450219104 |
| GTF2IP13      | -1.396123789 | 0.008526508601 |
| GPR158-AS1    | -4.848467894 | 0.008553432204 |
| IGFBP4        | -2.982805565 | 0.008596466917 |
| AC009506.1    | -1.829064139 | 0.008609605431 |
| CTC-429P9.5   | -1.447075865 | 0.008652922341 |
| RORA          | -3.129045506 | 0.008655684644 |
| CTD-2116N20.1 | -2.493858948 | 0.008759872539 |
| AC003991.3    | -4.831684984 | 0.008761441907 |
| STAR          | -5.182937317 | 0.008793743218 |
| PCDHB15       | -2.388931659 | 0.008840830186 |
| S100A4        | -2.87993749  | 0.00886444768  |
| TNFRSF19      | -3.867091943 | 0.008924069337 |
| TYRO3         | -1.264610557 | 0.00895432122  |
| DMRTA2        | -4.828751997 | 0.009035238128 |
| DIXDC1        | -1.616748419 | 0.009042714686 |
| ATP2A2        | -1.061903328 | 0.009085993475 |
| LYPD1         | -3.739508984 | 0.009102181056 |
| MTMR10        | -1.242104465 | 0.009145037318 |
| RP11-318C24.2 | -4.828048624 | 0.009147507666 |
| AGBL3         | -1.061288194 | 0.009173829677 |
| TIAM1         | -2.07132173  | 0.00924211985  |
| TMX3          | -1.238228024 | 0.00926465335  |
| KLHL24        | -1.345531734 | 0.009388624109 |
| OS9           | -1.120775826 | 0.00939927667  |
| MBD1          | -1.128847187 | 0.009399627428 |
| PHF12         | -1.088155462 | 0.009408449871 |
| AC005220.3    | -5.551988115 | 0.009426543604 |
| VPS33A        | -1.057034115 | 0.009462820097 |
| RNF128        | -5.182990908 | 0.009488958547 |
| SNX1          | -2.163906944 | 0.009498479923 |
| CDKAL1        | -1.816706617 | 0.009498479923 |
| LHX2          | -1.135520715 | 0.0095553037   |
| LPAR1         | -1.49994187  | 0.00956113669  |
| SFMBT2        | -1.187935395 | 0.00956113669  |
| PDIA4         | -1.158319336 | 0.009565871393 |
| L3HYPDH       | -1.752081738 | 0.009658583907 |
| MAP1LC3B      | -1.460463461 | 0.00966229218  |
| PRRT3         | -1.848819964 | 0.009683793108 |
| ARHGAP35      | -1.16773525  | 0.009683864136 |
| C21orf58      | -1.187242538 | 0.009693058467 |
| KCNJ15        | -5.525751705 | 0.009794806531 |
| LIPG          | -5.093382783 | 0.00980149363  |
| GABRB3        | -5.54822997  | 0.009810522744 |
| ABHD2         | -1.24510971  | 0.009834703337 |
| LINC01578     | -1.334542649 | 0.009873474105 |
| ITGA9         | -4.922385084 | 0.009885444252 |
| SLC26A1       | -4.844346393 | 0.009926816565 |
| CPSF4         | -1.13349966  | 0.009927863387 |
| SATB2-AS1     | -2.516153774 | 0.009929319141 |
| SVILP1        | -2.605414226 | 0.00997183135  |
| GABRA2        | -4.956357453 | 0.01002012745  |
| CTD-2506P8.6  | -2.007486644 | 0.0100673699   |
| RP11-259K15.2 | -5.018307458 | 0.01012902648  |
| NAXD          | -1.193327903 | 0.01013055487  |
| SETMAR        | -1.224699386 | 0.01022691535  |
| RP11-495P10.1 | -2.427570824 | 0.01023459117  |
| NXPH2         | -5.502533381 | 0.01027794582  |
| GOLM1         | -1.853170757 | 0.01033799195  |
| UBE2N         | -1.010149092 | 0.01037461648  |
| STAT3         | -1.406207472 | 0.01052727282  |
| LMOD1         | -4.857411798 | 0.01057241416  |
| FAFAP1L1      | -1.667286633 | 0.01068536734  |
| PDCD4-AS1     | -1.479755948 | 0.01069589917  |
| LSP1          | -3.952276757 | 0.01073264238  |

|                |             |               |               |              |               |
|----------------|-------------|---------------|---------------|--------------|---------------|
| AP000442.1     | 1.819045455 | 0.03934463347 | SLC38A7       | -1.253544202 | 0.01074385483 |
| KIF7           | 1.737705301 | 0.03934937729 | PLEK          | -4.941306972 | 0.01080182827 |
| SIDT1          | 3.841068065 | 0.03937217257 | RP11-131L12.2 | -4.429400759 | 0.01081304619 |
| ERICH6-AS1     | 1.601404055 | 0.03938598822 | CUBN          | -2.516740013 | 0.0108455522  |
| CSMD3          | 2.749939768 | 0.03941735517 | POLR2J4       | -1.531158764 | 0.01085000352 |
| RP11-44N22.3   | 2.451911166 | 0.03951878733 | EGR3          | -3.21776498  | 0.01086501954 |
| METRNL         | 2.174270526 | 0.03955328855 | MAP4K4        | -1.042399508 | 0.01087233698 |
| MED15P9        | 4.418146045 | 0.03958973964 | SKINT1L       | -4.598385595 | 0.01088255378 |
| BOP1           | 1.261122679 | 0.03964881747 | SCRN1         | -1.933484303 | 0.01090030194 |
| LYAR           | 1.550537407 | 0.03966314585 | PCDHGA10      | -3.261688889 | 0.01095545531 |
| CATSPER2P1     | 1.263821367 | 0.03966314585 | SNAP25        | -3.574188949 | 0.01099160421 |
| C3             | 2.880806208 | 0.03979115124 | TMEM130       | -4.634888698 | 0.01099160421 |
| CTC-529P8.1    | 2.519627515 | 0.03979660975 | SRR           | -1.264081587 | 0.01100692949 |
| RP13-349O20.2  | 1.41595205  | 0.04007012692 | NEO1          | -1.368746629 | 0.0110537643  |
| STAT4          | 2.806143704 | 0.04009804403 | BRMS1L        | -1.229905563 | 0.01106363478 |
| PCDHGA7        | 1.518863482 | 0.04014914625 | CLDN4         | -4.465142947 | 0.01106725497 |
| SPSB2          | 1.166286291 | 0.04030232701 | RBM26-AS1     | -1.372105486 | 0.01108391598 |
| STRCP1         | 2.900765237 | 0.04030232701 | AGFG2         | -1.337603735 | 0.01110980512 |
| SLC25A19       | 1.289248701 | 0.04036255058 | INPP5D        | -4.72493494  | 0.01120034087 |
| RP11-54O7.18   | 4.304917175 | 0.0404314925  | UPF3AP2       | -1.011411975 | 0.0112120212  |
| RP11-380G5.2   | 3.144009804 | 0.04066267001 | CTSK          | -2.152043768 | 0.01124353895 |
| RP11-438D8.2   | 4.218401032 | 0.04088791089 | TRPV4         | -4.541485172 | 0.01126003085 |
| RP11-66N24.3   | 1.113943438 | 0.04105688984 | RIMKLA        | -1.557459297 | 0.01131328688 |
| CTD-2008P7.6   | 2.71907958  | 0.04123771566 | LINC01727     | -5.094783739 | 0.01133708271 |
| RP11-150C16.1  | 3.321742726 | 0.04124693278 | VWA5A         | -3.888056191 | 0.01135056792 |
| RP4-607I.1     | 2.803939029 | 0.04132568467 | CTSO          | -2.034259644 | 0.01135572716 |
| IFI6           | 1.495670824 | 0.04135770208 | TEX261        | -1.164053081 | 0.0113687258  |
| RP11-108M9.3   | 4.217755779 | 0.04135778809 | IGSF5         | -4.859755467 | 0.01142943634 |
| KIFC2          | 1.17950932  | 0.04139550145 | AC009403.2    | -1.503408273 | 0.01143030468 |
| EREG           | 4.297083774 | 0.04148729096 | SMAD2         | -1.047772627 | 0.01145145868 |
| SLC25A22       | 1.073915209 | 0.04186119758 | HMGB1         | -1.053785111 | 0.01154972144 |
| AC012456.4     | 3.658464197 | 0.04192439519 | TMEM2         | -2.390735082 | 0.0115684589  |
| ZNF526         | 1.073495395 | 0.04207796074 | ZNF24         | -1.11489381  | 0.01159288801 |
| RP11-350J20.5  | 3.028697357 | 0.04207796074 | RP11-46H11.12 | -4.730923494 | 0.01160296881 |
| DGAT1          | 1.291767371 | 0.04227784969 | LINC02104     | -4.951757049 | 0.01162481901 |
| ARMC2          | 1.260488581 | 0.04237059544 | L3MBTL2       | -1.25829594  | 0.01163297633 |
| PRDM16         | 3.202462642 | 0.0424175539  | IP6K1         | -1.219627994 | 0.01163297633 |
| TMEM191A       | 3.315083554 | 0.04242712125 | WDR86-AS1     | -5.442248239 | 0.01163761728 |
| ZNF23          | 1.318167936 | 0.04256980227 | STARD13       | -2.333491404 | 0.01164344034 |
| RP11-525A16.4  | 3.533212305 | 0.04257278328 | NLGN2         | -1.133591966 | 0.01166482751 |
| DNAJB13        | 2.833472192 | 0.04280364845 | ZNF571-AS1    | -4.974764195 | 0.01170403198 |
| AC091878.1     | 4.248277103 | 0.04292114517 | BTBD6         | -1.59387741  | 0.0117398187  |
| MORC4          | 1.467772928 | 0.04302988467 | ZNF138        | -1.236745911 | 0.0117410892  |
| BCL6B          | 2.879423633 | 0.04314804473 | AC005519.4    | -1.765263623 | 0.01181083695 |
| MAP3K15        | 1.418234632 | 0.04320500181 | RABGAP1       | -1.418405523 | 0.01182730268 |
| ELMOD1         | 2.511119716 | 0.04320818754 | RP11-456K23.1 | -5.421627125 | 0.0118534843  |
| IL12A          | 1.072305826 | 0.04320818754 | ZMYND8        | -1.458418308 | 0.01187922224 |
| ZBED8          | 1.054307621 | 0.04320955143 | GTF2IRD2P1    | -4.502661551 | 0.01188075219 |
| GMNC           | 4.393328017 | 0.04337788541 | ZMPSTE24      | -1.12253204  | 0.01202078226 |
| FGF7P8         | 4.364164945 | 0.04337788541 | COLCA2        | -4.715198645 | 0.01207939496 |
| LINC01376      | 1.365574836 | 0.04341651479 | ATF7IP        | -1.117082972 | 0.01210692174 |
| RTBDN          | 2.219928515 | 0.04343269985 | C21orf33      | -1.673534053 | 0.01211841854 |
| MYL2           | 4.391155455 | 0.04344809764 | C18orf32      | -2.032558263 | 0.01213050375 |
| PYY            | 3.33794033  | 0.04344809764 | LHFPL4        | -1.457515424 | 0.01215705758 |
| AIFM2          | 1.225566695 | 0.04355187067 | MYO23         | -4.137125699 | 0.01217059243 |
| UVRAG          | 1.205152265 | 0.0437845838  | CCDC140       | -5.103303613 | 0.01218791759 |
| ULBP3          | 1.203934904 | 0.04383406315 | HLF           | -1.867360276 | 0.0121972216  |
| DNAJC12        | 1.142199416 | 0.04436566611 | CD34          | -5.415531733 | 0.01219909409 |
| DCST2          | 1.596935293 | 0.04437787618 | PCSK5         | -3.568429859 | 0.01222787732 |
| WDR3           | 1.018149225 | 0.04440133557 | COX5BP6       | -2.155563195 | 0.01228379554 |
| CTD-2616J11.1E | 3.779180972 | 0.04453057161 | OBSL1         | -1.403701046 | 0.01240023565 |
| OAS3           | 1.24788139  | 0.04457426128 | CTC-498J12.1  | -4.715600867 | 0.01241394295 |
| RP11-666A20.4  | 4.199150077 | 0.04500514622 | RTN1          | -3.752368536 | 0.01243144008 |
| DRC3           | 1.56777941  | 0.04502153531 | NBEA          | -1.674659534 | 0.01243144008 |
| WDR18          | 1.350059104 | 0.04508854596 | GDF6          | -5.419686649 | 0.01249898506 |
| POLD1          | 1.223461571 | 0.04540326691 | CHRNA9        | -4.98906756  | 0.01255874903 |
| LMNA           | 1.117541231 | 0.0454063878  | MAOB          | -5.532764789 | 0.012634349   |
| LINC00466      | 2.60243764  | 0.04580605729 | EPN2          | -1.058710327 | 0.01264815875 |

|               |             |               |
|---------------|-------------|---------------|
| PYGB          | 1.101456114 | 0.04598559352 |
| ZEB1-AS1      | 1.400077752 | 0.0460241598  |
| RP11-799D4.4  | 2.484736958 | 0.04605572258 |
| LINC01232     | 1.268280286 | 0.04613359129 |
| MROH1         | 1.215027084 | 0.0461733871  |
| RP11-763B22.4 | 4.23049027  | 0.04623083657 |
| CCDC169       | 1.55615072  | 0.04636223328 |
| TMEM261       | 1.0554852   | 0.04642602013 |
| RPS6          | 1.004693928 | 0.04651237249 |
| CTD-2616J11.2 | 2.356376529 | 0.0466112716  |
| RP11-360O19.4 | 4.227441386 | 0.04688807227 |
| RP11-429J17.7 | 3.84532819  | 0.04698622317 |
| ABCG4         | 2.265925842 | 0.04709894339 |
| SHROOM1       | 1.872767263 | 0.04734839073 |
| RP3-465N24.5  | 1.668474974 | 0.04751939906 |
| RP11-498P14.5 | 2.081135395 | 0.04765588714 |
| AC007879.3    | 2.990029833 | 0.04801605006 |
| RP11-473M10.3 | 4.224174443 | 0.04813156201 |
| CC2D1A        | 1.005138503 | 0.04821400833 |
| SYNE3         | 2.357888273 | 0.04832024572 |
| RP11-321L2.1  | 3.216843551 | 0.04848793487 |
| RP11-526D8.7  | 4.217815787 | 0.04853946633 |
| RP1-179N16.6  | 1.310811807 | 0.04867548494 |
| CFAP54        | 2.730732716 | 0.04892529335 |
| HSPA1A        | 4.162493763 | 0.04910030017 |
| CFAP45        | 2.1429671   | 0.04910570688 |
| CTD-2334D19.1 | 4.331422054 | 0.04916671913 |
| SMKR1         | 1.684159571 | 0.04930666603 |
| RP11-89F3.2   | 3.75747999  | 0.04956146826 |
| TNFRSF12A     | 2.04597705  | 0.04984552332 |
| KLF4          | 1.96858706  | 0.04985425972 |
| RP11-300E4.2  | 4.126787633 | 0.04989447671 |
| HECW1         | 1.639764714 | 0.04991663415 |
| TRPM6         | 3.347037706 | 0.04997195198 |

|              |              |               |
|--------------|--------------|---------------|
| SERPINH1     | -2.201737213 | 0.01265483939 |
| SLC12A9      | -1.420691004 | 0.01266671626 |
| FIS1         | -1.122048494 | 0.01266671626 |
| PDIA2        | -4.90016734  | 0.01267762998 |
| TIGD4        | -1.361237215 | 0.0127164305  |
| ETV6         | -1.779954798 | 0.01273246732 |
| ACTR1A       | -1.068640004 | 0.01276985639 |
| KRBA1        | -1.121816959 | 0.0127717863  |
| PCDH1        | -2.73880449  | 0.01279173593 |
| INHBB        | -3.97827568  | 0.01282362396 |
| HACD3        | -1.023127296 | 0.01285832088 |
| ACTR3C       | -5.066091268 | 0.01289228634 |
| HCG22        | -5.376293427 | 0.01290859019 |
| TCN2         | -2.373127321 | 0.01292083837 |
| KANSL1L      | -1.09224532  | 0.01299767714 |
| CIDECP       | -1.25557719  | 0.01300758988 |
| STRIP2       | -1.92399899  | 0.01302249865 |
| ZNF784       | -1.537091366 | 0.01304528106 |
| TLE4         | -1.632946777 | 0.0130706618  |
| NRM          | -1.41478861  | 0.01307985467 |
| NIPAL4       | -4.815582117 | 0.01311051218 |
| LINC01505    | -3.330138445 | 0.01312200277 |
| GSC          | -5.372186312 | 0.01312203969 |
| PDCD6IPP2    | -1.590166055 | 0.01312203969 |
| MYO5B        | -2.989582383 | 0.01316241238 |
| LEF1-AS1     | -4.864527245 | 0.01317131543 |
| GS1-259H13.2 | -3.156508562 | 0.01318921898 |
| ARID5A       | -1.517718623 | 0.01321606205 |
| RP11-496I9.1 | -2.981307848 | 0.01322938674 |
| FNIP2        | -1.346893651 | 0.01328457477 |
| ATP6V0E1     | -1.066929508 | 0.01336824616 |
| PAQR4        | -1.343392509 | 0.0134282859  |
| ZNF836       | -1.578500416 | 0.01345613209 |
| DNAJA4       | -5.125224956 | 0.01347063473 |
| CHST6        | -1.909169059 | 0.0134862283  |
| ISCA1        | -1.040601339 | 0.01364840762 |
| LINC01132    | -4.971933474 | 0.01375764852 |
| VPS37D       | -2.311506937 | 0.01382833228 |
| RP11-50D16.4 | -4.651213362 | 0.01382833228 |
| CNPY2        | -1.45389995  | 0.01383247188 |
| RP11-848P1.5 | -2.669653108 | 0.01383247188 |
| CCDC160      | -4.087525217 | 0.01385019035 |
| AKR7A2       | -1.29363271  | 0.01386987368 |
| TUBB2A       | -1.597020733 | 0.01388183374 |
| CRYBB1       | -5.455885259 | 0.01392924946 |
| MAP7D1       | -1.084772101 | 0.01396760647 |
| COPG2        | -1.081491684 | 0.01397250807 |
| TSPAN31      | -1.16005719  | 0.01400256042 |
| ANKLE1       | -2.4666407   | 0.01401653329 |
| RASL10A      | -4.645904155 | 0.01412309898 |
| CYP4F25P     | -2.5169652   | 0.01420853731 |
| SEPT2        | -1.010013484 | 0.0142321712  |
| GSTM1        | -4.612987802 | 0.01432514328 |
| NPIPA1       | -1.074379241 | 0.01444495472 |
| HN1L         | -1.375791573 | 0.01450753403 |
| LINC00648    | -4.645172685 | 0.01450753403 |
| CDH3         | -3.769199448 | 0.01462086309 |
| GPER1        | -3.245480098 | 0.01471688999 |
| PAR3B        | -1.350809921 | 0.01473880184 |
| AP000473.5   | -3.704294737 | 0.01474654732 |
| AC027612.4   | -5.315763392 | 0.01476901052 |
| DBNDD1       | -1.435023233 | 0.01502694145 |
| LMCD1-AS1    | -2.605152147 | 0.01511098396 |
| MROH8        | -1.737143816 | 0.01520324938 |
| CUL4A        | -1.105717857 | 0.0154294165  |
| USP54        | -2.161500499 | 0.01553958042 |
| ZNF480       | -1.319612695 | 0.01558938453 |
| XRCC2        | -1.080519715 | 0.01565827956 |

|               |              |               |
|---------------|--------------|---------------|
| MEG9          | -5.272678764 | 0.01572805843 |
| ARHGFE26      | -1.52033562  | 0.01573856063 |
| CPA2          | -5.294565689 | 0.01573856063 |
| MYH7          | -4.862240757 | 0.01586121556 |
| FMC1          | -2.232695125 | 0.01590144024 |
| ZNF180        | -1.11388579  | 0.01595483866 |
| UNC13A        | -3.218726903 | 0.01598231002 |
| UCP3          | -1.752307867 | 0.01598900147 |
| SELENON       | -1.258213644 | 0.0159939912  |
| ZMYM4         | -1.073665877 | 0.0160645195  |
| TOMM5         | -1.152875408 | 0.01608499587 |
| AE000661.37   | -5.261994157 | 0.01613549692 |
| BMP1          | -1.898669967 | 0.01614389603 |
| THSD7A        | -3.652561692 | 0.0161488789  |
| WARS          | -1.0592577   | 0.01615281415 |
| SIDT2         | -1.229256527 | 0.01615281415 |
| LOH12CR2      | -1.67691758  | 0.01636598428 |
| GRM2          | -4.427570348 | 0.01644954715 |
| PPM1L         | -1.03094081  | 0.01649610118 |
| ADCK1         | -1.507689762 | 0.01649658618 |
| SMIM7         | -1.089195785 | 0.01656341556 |
| GLIPR2        | -1.635939354 | 0.01660478679 |
| RP11-2711.4   | -1.559549043 | 0.01667587774 |
| MCUR1         | -1.048329386 | 0.01671446453 |
| CIZ1          | -1.126964478 | 0.01685817668 |
| C6orf223      | -2.803776968 | 0.01688864763 |
| AC010883.5    | -2.094717492 | 0.01690504352 |
| LANCL3        | -3.676289883 | 0.01716366508 |
| SWAP70        | -1.00314323  | 0.01722553773 |
| RP11-796E2.4  | -2.760083635 | 0.01723144724 |
| PPIA          | -1.182175414 | 0.0173059176  |
| JAM2          | -3.00487969  | 0.01743735981 |
| LINC01410     | -1.678064504 | 0.0174400882  |
| RPP40         | -1.061085731 | 0.01746395472 |
| TSPAN5        | -2.215451125 | 0.01755012935 |
| FKBP9P1       | -2.786653961 | 0.01763436275 |
| PPP1R12B      | -1.091803732 | 0.01764074781 |
| TMEM132C      | -5.280471444 | 0.01764074781 |
| TAX1BP1       | -1.020367875 | 0.01765393428 |
| PROCA1        | -1.879371455 | 0.01774208688 |
| RP11-428J1.4  | -2.3268122   | 0.01789964346 |
| KAT7          | -1.112235302 | 0.01793708259 |
| PAXBP1-AS1    | -1.862069318 | 0.01803800624 |
| DBX2          | -4.985128784 | 0.01803947302 |
| FGF1          | -2.194756496 | 0.01809873022 |
| ZADH2         | -1.010574957 | 0.01814637299 |
| RP11-627G23.1 | -4.609350113 | 0.01814637299 |
| RSU1P2        | -5.225366186 | 0.01818090749 |
| RP11-257P3.3  | -4.876959069 | 0.01823445458 |
| LINC01085     | -3.70779577  | 0.01823959845 |
| FBLN5         | -4.702085663 | 0.01828660283 |
| PTCH2         | -2.74398405  | 0.01836790408 |
| HORMAD2       | -5.188698527 | 0.01839180083 |
| POLR2J        | -1.083909056 | 0.01842346686 |
| SLC26A10      | -1.571036973 | 0.01842346686 |
| TRIM62        | -1.30990185  | 0.01847844345 |
| CCDC175       | -5.185300482 | 0.01848685316 |
| ATP8A2        | -4.291460198 | 0.01851106605 |
| SEC14L2       | -1.335052376 | 0.0185284686  |
| TENM3         | -3.492901526 | 0.01855474263 |
| SERF1B        | -2.038929624 | 0.01857871248 |
| RP11-274B21.1 | -1.036207664 | 0.01858357895 |
| FAP           | -4.835194214 | 0.01863198518 |
| ZFYVE16       | -1.625023493 | 0.01864231613 |
| ADCY6         | -1.377884627 | 0.01864612585 |
| TEF           | -1.438246803 | 0.0186734286  |
| CLK1          | -1.121236214 | 0.01885873773 |
| RBP1          | -4.740776138 | 0.01886058615 |

|               |              |               |
|---------------|--------------|---------------|
| TPP1          | -1.118401138 | 0.01887313444 |
| ADAMTS7       | -2.2195974   | 0.01896799307 |
| TCTN2         | -1.430464998 | 0.01907818385 |
| SERINC5       | -1.141579865 | 0.01919392089 |
| FMN1          | -2.440974978 | 0.01923363864 |
| AC108488.4    | -1.73751869  | 0.01934800273 |
| RECK          | -1.095674901 | 0.01938349282 |
| LIMA1         | -1.110009956 | 0.01949806652 |
| PITHD1        | -1.049148389 | 0.01949968909 |
| RABL2A        | -1.062556597 | 0.01956697924 |
| KLC1          | -1.135311744 | 0.01962575376 |
| RP11-351J23.1 | -4.495981675 | 0.0196358903  |
| NMRAL2P       | -3.568712178 | 0.01965706005 |
| GIPC3         | -4.757185092 | 0.01970721479 |
| NAGLU         | -1.421840041 | 0.0197509011  |
| UBA7          | -1.808348574 | 0.01975944203 |
| RTP4          | -3.567992139 | 0.01977993331 |
| CYSLTR2       | -5.180562209 | 0.01977993331 |
| RP11-54D18.2  | -2.897950156 | 0.0198209433  |
| SMARCB1       | -1.03897791  | 0.01982550254 |
| FBXO39        | -5.166830435 | 0.02001968978 |
| ZNF596        | -1.980658695 | 0.02007730268 |
| WWP2          | -1.97774029  | 0.02010486098 |
| LINC01549     | -4.572397451 | 0.02015732158 |
| NAPA          | -1.170732703 | 0.02016004222 |
| MFSD14C       | -1.388260464 | 0.02016884735 |
| ZDHHC17       | -1.032897555 | 0.02019774548 |
| SMDT1         | -1.227006232 | 0.02028639716 |
| LINC01503     | -3.739534837 | 0.02029372027 |
| MYSM1         | -1.008475942 | 0.0203993544  |
| ARHGEF40      | -1.48529973  | 0.02048618293 |
| TRAC          | -5.207150108 | 0.02051717342 |
| AC074391.1    | -3.969413731 | 0.02052388547 |
| HIST1H3D      | -3.066695655 | 0.02062658511 |
| SCN2B         | -4.612587548 | 0.02067453567 |
| RP11-263K19.4 | -2.442177897 | 0.02069675234 |
| CHST14        | -1.362274446 | 0.02076114267 |
| LINC00856     | -3.714459878 | 0.02076114267 |
| MMD2          | -4.703942691 | 0.02095120897 |
| PBLD          | -1.511055991 | 0.0210456504  |
| CMYA5         | -2.199542165 | 0.0211731849  |
| NFE2L1        | -1.284855613 | 0.02143014669 |
| EGFEM1P       | -1.60304294  | 0.02143829914 |
| EPHB4         | -1.451703659 | 0.02152335606 |
| RP11-1055B8.4 | -1.750344036 | 0.02152849722 |
| ZSCAN23       | -1.278905726 | 0.02154150772 |
| ZIM2-AS1      | -5.728487225 | 0.02157254241 |
| KCNAB1        | -4.634241237 | 0.02159080678 |
| ELAVL2        | -2.680505056 | 0.02170893029 |
| DUSP4         | -2.846789594 | 0.02173576314 |
| SEPT7P3       | -2.286634191 | 0.02175672944 |
| TNN           | -3.052157608 | 0.02187928191 |
| CEP85L        | -1.700958305 | 0.02196281938 |
| FLOT2         | -1.291724195 | 0.02199967924 |
| APBB1         | -1.097763018 | 0.02214553784 |
| AC006026.13   | -4.479051824 | 0.02214956939 |
| SLC6A11       | -4.73300233  | 0.0222210514  |
| C20orf196     | -1.653755861 | 0.02229771785 |
| NRXN1         | -4.878613041 | 0.02236941137 |
| AC147651.4    | -2.346840133 | 0.02236941137 |
| IQCA1L        | -3.961663442 | 0.02236941137 |
| TIMP2         | -1.605633935 | 0.02246955709 |
| RASA4         | -2.23875188  | 0.02251500341 |
| GFRA3         | -4.716226762 | 0.02251632639 |
| LCA5L         | -1.622065567 | 0.02252697764 |
| KIF9-AS1      | -2.115428858 | 0.02255149604 |
| LINC01579     | -5.63619742  | 0.02270412626 |
| HIST1H4H      | -2.053581368 | 0.02296145971 |



|                |              |               |
|----------------|--------------|---------------|
| ANKRD9         | -1.609927333 | 0.02298963557 |
| SPIN3          | -1.02601748  | 0.02299982084 |
| CTC-471J1.2    | -2.610533659 | 0.02304810569 |
| SEZ6L          | -5.600237477 | 0.02307067542 |
| ZBTB1          | -1.036029902 | 0.02315678997 |
| AC013460.1     | -3.941300567 | 0.02315678997 |
| DNM1           | -1.940673073 | 0.02316430587 |
| COQ4           | -1.166664683 | 0.02321509016 |
| MEIS3          | -1.979511956 | 0.02331342304 |
| RASGRP1        | -2.255421973 | 0.02333289846 |
| NPR1           | -3.261858369 | 0.02353109919 |
| STKLD1         | -1.593759505 | 0.02353526342 |
| C20orf194      | -1.095541521 | 0.02358174193 |
| ATP6V1B1       | -1.639697141 | 0.0235821543  |
| ENDOU          | -4.481845887 | 0.02358390116 |
| GPSM3          | -1.593961387 | 0.02358390116 |
| SAMD14         | -3.210717561 | 0.02361794864 |
| RTP1           | -5.119707558 | 0.02361794864 |
| SMC5-AS1       | -1.897243206 | 0.02369980112 |
| CDK4           | -1.080127317 | 0.02382768186 |
| PLOD2          | -1.094339997 | 0.02385448137 |
| FAM182A        | -3.610013261 | 0.02387122837 |
| MEPCE          | -1.418934641 | 0.02387366844 |
| RSPH14         | -3.872224168 | 0.02404210977 |
| SSH1           | -1.210330621 | 0.02404780723 |
| RP11-266K4.9   | -4.240484463 | 0.02410366745 |
| SEMA6A-AS2     | -3.304025762 | 0.02410976757 |
| PNCK           | -2.012182039 | 0.02413654138 |
| IGLON5         | -5.574917337 | 0.0242550133  |
| ERMAP          | -1.565357325 | 0.02430926605 |
| LINC01176      | -2.557288743 | 0.02431191476 |
| KANTR          | -1.274402115 | 0.02433597946 |
| IGFBP3         | -3.485180675 | 0.02436418194 |
| PTPN9          | -1.009102308 | 0.02443376064 |
| RP1-274L7.4    | -3.830894524 | 0.02450292679 |
| NFKBIB         | -1.165949929 | 0.02454385339 |
| MAFTRR         | -4.19633104  | 0.02455506531 |
| C5orf67        | -5.027492741 | 0.02460976606 |
| SPX            | -3.521762736 | 0.0246260443  |
| RP11-402D21.2  | -2.199728472 | 0.02464133448 |
| DBP            | -1.253145196 | 0.0246848529  |
| C1orf21        | -1.66415185  | 0.02473822744 |
| ZNF702P        | -4.678485478 | 0.02480551964 |
| TENM4          | -5.697139054 | 0.02483349446 |
| MGARP          | -3.460228809 | 0.02484654259 |
| TEKT3          | -2.570098095 | 0.02496524068 |
| ACSS1          | -1.001498873 | 0.0250473989  |
| AC083867.4     | -4.653553283 | 0.02528750154 |
| POMZP3         | -1.390858878 | 0.02538695052 |
| HERC2          | -1.107655719 | 0.02539201053 |
| CXCL11         | -4.886617656 | 0.0254483105  |
| LA16c-313D11.1 | -2.757496698 | 0.0254956113  |
| RNF208         | -1.949666981 | 0.02554610578 |
| YWHAH          | -1.16405029  | 0.02558465875 |
| MATN3          | -4.59424317  | 0.02558909313 |
| VOPP1          | -1.468894317 | 0.02577933295 |
| ZNF165         | -1.943188722 | 0.02577933295 |
| RP11-767N6.7   | -1.718742998 | 0.02577956814 |
| TOB1           | -1.404346425 | 0.02578653601 |
| MYCBP2         | -1.320982412 | 0.0258168125  |
| TPTE2P5        | -3.062938455 | 0.02589483178 |
| RP11-465C12.1  | -4.999887627 | 0.02589483178 |
| ENO3           | -1.927766405 | 0.0259800486  |
| AC009473.1     | -2.9445404   | 0.02598977373 |
| MEOX2-AS1      | -5.001717284 | 0.02608338642 |
| TAF1C          | -1.124258077 | 0.02609705691 |
| PHLDA1         | -1.151633818 | 0.02620723528 |
| LINC01351      | -2.878391493 | 0.0262392154  |

|                |              |               |
|----------------|--------------|---------------|
| GRM7           | -3.468244654 | 0.02629536729 |
| SNHG11         | -1.126572362 | 0.02635014089 |
| THSD1          | -2.519072703 | 0.02637928321 |
| COLCA1         | -4.48488505  | 0.02648659538 |
| PTCD1          | -1.174756734 | 0.026520623   |
| BBOX1-AS1      | -4.343046929 | 0.026520623   |
| PAQR9          | -2.369702211 | 0.02671071193 |
| TBCK           | -1.366191321 | 0.02671588276 |
| RP11-386G11.8  | -4.980436546 | 0.02682216905 |
| FRMD6          | -1.249605373 | 0.02693390969 |
| RGS12          | -1.549395277 | 0.02693442205 |
| GSTZ1          | -1.140401851 | 0.02696471224 |
| RP11-103J8.1   | -4.62662294  | 0.02702386982 |
| PTPRN          | -3.977913973 | 0.02736436108 |
| NPEPL1         | -1.520914885 | 0.02737289541 |
| RBPMS          | -2.56712388  | 0.02742119653 |
| CUBNP2         | -4.970357227 | 0.02746794017 |
| TFCP2L1        | -2.711430953 | 0.02749247229 |
| C12orf49       | -1.404722565 | 0.02751362305 |
| ZNF184         | -1.215098531 | 0.02755787246 |
| EMC8           | -1.024324004 | 0.02758436408 |
| RGMB-AS1       | -2.82462874  | 0.02763328829 |
| MFS2A          | -1.608454625 | 0.02766165192 |
| TAF6L          | -1.054566535 | 0.02769866225 |
| ANK1           | -3.324685999 | 0.02784548501 |
| HOXC4          | -2.415318087 | 0.02784548501 |
| HIST2H4A       | -2.194569767 | 0.02788244635 |
| C16orf45       | -3.139798339 | 0.02790567306 |
| C11orf96       | -2.612570619 | 0.02797058924 |
| ARMC7          | -1.334944859 | 0.02797615493 |
| COA3           | -1.147274974 | 0.02809119485 |
| TBKBP1         | -1.015032544 | 0.0280926059  |
| LINC01679      | -4.497326429 | 0.02812941459 |
| AP000662.4     | -2.885341154 | 0.02812941459 |
| LAMTOR4        | -1.171464262 | 0.02817940831 |
| ZNF410         | -1.642313258 | 0.02835847673 |
| C5             | -2.197702672 | 0.02837920971 |
| RP11-615I2.2   | -4.365796099 | 0.02857671418 |
| LDB2           | -5.615356655 | 0.02860894651 |
| GADD45G        | -4.623560495 | 0.02865309745 |
| SLC22A17       | -1.4546415   | 0.02866036952 |
| SLC35E2        | -1.22683416  | 0.02876714954 |
| RP11-762I7.4   | -2.278249563 | 0.02883168565 |
| FAM53B         | -1.032313943 | 0.02886202535 |
| RP11-4B14.3    | -4.355487064 | 0.02886202535 |
| FLT1           | -5.331703573 | 0.02886266936 |
| AKIRIN2        | -1.093749503 | 0.02886266936 |
| RP11-631N16.2  | -1.085770273 | 0.02886266936 |
| RP11-728K20.1  | -4.929964944 | 0.02886469305 |
| CTD-2010I16.1  | -3.238439289 | 0.02887140667 |
| ZNF432         | -1.261372899 | 0.02918046129 |
| C8orf33        | -1.143859349 | 0.02919718426 |
| DICER1-AS1     | -1.364817281 | 0.0292484033  |
| ZNF664         | -1.115615316 | 0.02930132666 |
| PCDHGC5        | -2.233557493 | 0.02936653155 |
| LINC01207      | -4.708937508 | 0.02946120168 |
| RAPGEF4-AS1    | -4.937860174 | 0.02950265689 |
| SNAI2          | -3.034326106 | 0.02964744196 |
| SEZ6           | -5.337512154 | 0.02964744196 |
| LACTB2-AS1     | -4.286377731 | 0.02964744196 |
| PRAG1          | -2.397735907 | 0.02964744196 |
| GRIN2D         | -2.929729894 | 0.02965218063 |
| CHMP3          | -1.099229998 | 0.02973509386 |
| RP11-1280N14.3 | -2.45280853  | 0.02986669296 |
| USP5           | -1.10345883  | 0.02993405952 |
| TMEM88         | -3.931908579 | 0.03020942305 |
| LHX6           | -3.032134934 | 0.03061656041 |
| AC007255.8     | -3.502363755 | 0.03069365847 |

|               |              |               |
|---------------|--------------|---------------|
| NFIA          | -1.101880345 | 0.03121421558 |
| AQP4          | -5.303845444 | 0.03128250069 |
| RP11-977G19.5 | -1.031585015 | 0.03128250069 |
| ZNF497        | -2.121990603 | 0.03144826689 |
| MEX3B         | -1.068023807 | 0.03152127912 |
| PRR26         | -4.360719055 | 0.03165134489 |
| RP11-536C5.2  | -4.323396763 | 0.03165134489 |
| SPON1         | -4.383978921 | 0.03169829402 |
| DYNC1H1       | -1.592384778 | 0.03173060018 |
| SLC38A9       | -1.102937651 | 0.03174089186 |
| RP11-4L24.4   | -1.128201374 | 0.03186785628 |
| ARHGAP24      | -2.994552185 | 0.03194872269 |
| TTLL7         | -1.276972724 | 0.03197829912 |
| RP11-156P1.3  | -1.092878188 | 0.03206607327 |
| DTX2          | -1.479157327 | 0.03208360245 |
| ARPC4         | -1.03693576  | 0.03217150924 |
| RP5-981O7.2   | -2.847910582 | 0.03218753862 |
| GBP2          | -2.065336421 | 0.03219449816 |
| AP000704.5    | -2.044727445 | 0.03219449816 |
| LINC01080     | -4.462752051 | 0.03219449816 |
| AP001626.2    | -2.759241704 | 0.03227373944 |
| AC025171.1    | -1.521519352 | 0.03242846035 |
| RPH3A         | -5.387875211 | 0.0324331169  |
| RNASE6        | -4.434991614 | 0.03248716944 |
| CD9           | -1.311068127 | 0.03250234054 |
| RP11-445N18.5 | -4.872461677 | 0.03250247295 |
| UST           | -1.585044001 | 0.03258029553 |
| SLC2A11       | -1.269476672 | 0.03262397763 |
| KCNQ4         | -4.048889727 | 0.03263057323 |
| SKIL          | -1.363466368 | 0.03273332038 |
| C1orf122      | -1.423379664 | 0.03299355355 |
| SMIM3         | -2.59175709  | 0.03306528749 |
| NAPSA         | -3.887056667 | 0.03314059298 |
| SIX3          | -4.386238009 | 0.0332906455  |
| NR1D2         | -1.065319917 | 0.03358664258 |
| RP11-283G6.4  | -3.20224338  | 0.03358664258 |
| KB-318B8.7    | -1.944256244 | 0.03362102375 |
| FAM13A-AS1    | -1.68370732  | 0.0336246098  |
| ARHGEF37      | -1.487682197 | 0.03379650228 |
| HOXD13        | -3.154095298 | 0.03392010609 |
| CCDC159       | -1.294502763 | 0.03393469197 |
| ZNF663P       | -4.320542161 | 0.03395267252 |
| RP11-151I1.3  | -3.567386603 | 0.03422589494 |
| ROCK1P1       | -2.039979695 | 0.03423169291 |
| RP11-576I22.2 | -2.829342613 | 0.03429533444 |
| CHRFAM7A      | -3.315962818 | 0.03431800531 |
| CTD-2339F6.1  | -5.01173296  | 0.03435862537 |
| HSF2BP        | -1.615555654 | 0.03447360378 |
| HIF1A-AS1     | -2.767681274 | 0.03452866598 |
| BHLHB9        | -1.214364914 | 0.03466837556 |
| ST6GALNAC6    | -1.40334193  | 0.03470165226 |
| RP11-182J1.14 | -3.303699488 | 0.0347027342  |
| FOXRED2       | -1.059887226 | 0.03470882196 |
| ARHGAP42P2    | -4.285735307 | 0.0347683869  |
| CTD-2267D19.3 | -2.037278158 | 0.03477260771 |
| MIR181A1HG    | -3.345085444 | 0.03482068087 |
| PDLIM5        | -1.044069279 | 0.03484552108 |
| PINK1-AS      | -1.057937569 | 0.0349061461  |
| ADCY2         | -3.90805118  | 0.03505702405 |
| ZFP37         | -1.191089625 | 0.03531694235 |
| CNGA3         | -4.457249307 | 0.0353337303  |
| LRP2BP        | -1.857891393 | 0.03534109477 |
| SCD5          | -1.247348129 | 0.03539622341 |
| PTGDS         | -2.914017724 | 0.03539875304 |
| RP11-649E7.5  | -2.509432048 | 0.0354452056  |
| RP11-138I1.3  | -4.407859811 | 0.0354452056  |
| ZSCAN22       | -1.142902928 | 0.03545060999 |
| CEP162        | -1.670415613 | 0.03553978026 |

|               |              |               |
|---------------|--------------|---------------|
| RP11-624M8.1  | -3.838254014 | 0.03567976326 |
| PODXL         | -1.022715717 | 0.0356894481  |
| TIMELESS      | -1.025764368 | 0.03568986748 |
| ABCB4         | -3.485831353 | 0.03586087542 |
| G6PC3         | -1.080659601 | 0.03590447464 |
| TBC1D20       | -1.092307016 | 0.03600027876 |
| RP11-798M19.3 | -1.580474485 | 0.03616799772 |
| DHX29         | -1.017302754 | 0.03620890119 |
| LINC00342     | -1.17401864  | 0.0362703262  |
| LAMA2         | -2.232943913 | 0.03644377349 |
| TACC1         | -1.073020901 | 0.03644455666 |
| RP11-109E12.1 | -4.346789663 | 0.03650719876 |
| RAD9B         | -1.53490995  | 0.03660662791 |
| ZSCAN12P1     | -2.824494825 | 0.03660662791 |
| RIPPLY3       | -4.279496184 | 0.03664590129 |
| H2AFX         | -1.32837733  | 0.03678170336 |
| RBM26         | -1.069181615 | 0.03681120708 |
| RP11-146D12.2 | -2.33503296  | 0.03686205144 |
| CPNE4         | -4.865033835 | 0.03694665305 |
| TNFSF13       | -2.944961944 | 0.03695774867 |
| ZNF554        | -1.071057791 | 0.03698008006 |
| WNT7B         | -2.993345368 | 0.03698862136 |
| IL20RA        | -4.927124666 | 0.03699888875 |
| ITGA1         | -1.060674415 | 0.03703453328 |
| MYBPHL        | -3.910745144 | 0.03722460185 |
| NBPF10        | -1.079349352 | 0.03733945011 |
| LINC00598     | -3.25721974  | 0.03740130574 |
| WBP1L         | -1.199936575 | 0.03751585839 |
| ZCCHC18       | -1.226255666 | 0.03751585839 |
| POM121B       | -1.835226599 | 0.03753094183 |
| SMAD7         | -1.220665672 | 0.03755200236 |
| GRID2IP       | -3.025782384 | 0.03767317655 |
| PACS2         | -1.114402437 | 0.03768606891 |
| CSRP1         | -1.197304934 | 0.03803866331 |
| RHBDD3        | -1.133610052 | 0.03806597832 |
| EFHD1         | -2.136805664 | 0.03825883665 |
| SPRED2        | -1.132952794 | 0.03834267084 |
| FBXW2         | -1.108008763 | 0.03835017869 |
| AKAP3         | -1.737265058 | 0.03837795254 |
| CAMK2D        | -1.860134917 | 0.03850898767 |
| ZMAT1         | -1.271681481 | 0.03854992543 |
| TNFSF4        | -2.047753265 | 0.03875376185 |
| STX1B         | -1.896603968 | 0.03875464921 |
| DPM2          | -1.183995468 | 0.03880813815 |
| CTB-179K24.3  | -3.105323631 | 0.03897929109 |
| KCNJ16        | -4.291577987 | 0.03898190613 |
| SH3RF1        | -1.323076361 | 0.03938598822 |
| SLC38A6       | -1.146823099 | 0.03948874047 |
| ACSL6         | -4.332264302 | 0.03948874047 |
| ZNF324        | -1.076614657 | 0.03955312061 |
| PLCL1         | -3.087375714 | 0.03955655056 |
| COL4A3BP      | -1.373986406 | 0.03973000025 |
| ZNF33B        | -1.738782497 | 0.03981548942 |
| RBM6          | -1.011106047 | 0.03993438768 |
| CTSS          | -2.548455445 | 0.03993438768 |
| FAM174B       | -2.454478594 | 0.04000782695 |
| CA3-AS1       | -3.408899148 | 0.04007012692 |
| PITX2         | -3.176344797 | 0.04011675102 |
| SATB1-AS1     | -4.265492318 | 0.04023208631 |
| MGAT4A        | -1.86885204  | 0.04036255058 |
| CH507-9B2.9   | -1.414574764 | 0.04036255058 |
| FGFR2         | -1.679881674 | 0.0404314925  |
| NDE1          | -1.00806691  | 0.04055652833 |
| CTD-2619J13.3 | -3.870494129 | 0.04066267001 |
| SEPT7-AS1     | -1.273688927 | 0.04070666908 |
| ADAM19        | -3.106171353 | 0.04072612632 |
| C22orf24      | -3.362164712 | 0.04078140421 |
| HAVCR2        | -2.701801774 | 0.04078140421 |

|               |              |               |
|---------------|--------------|---------------|
| SSPO          | -2.781909787 | 0.04104117359 |
| ATP11A        | -1.141711817 | 0.04120840326 |
| ZER1          | -1.199783197 | 0.04120840326 |
| MSS51         | -1.103355636 | 0.04123771566 |
| TTLL1         | -1.001596167 | 0.04129163677 |
| CTC-325H20.8  | -4.379620268 | 0.04129163677 |
| CLN6          | -1.011937542 | 0.04139550145 |
| DOPEY1        | -1.404679516 | 0.04143512895 |
| HIRA          | -1.078028655 | 0.04146879641 |
| IL1RAP        | -2.900354913 | 0.04148729096 |
| RP13-644M16.5 | -4.354222882 | 0.04152622899 |
| LRRC9         | -4.700008534 | 0.04183496363 |
| RP11-431M7.3  | -4.378161653 | 0.04183496363 |
| FAM19A5       | -4.065415292 | 0.04186174727 |
| PON2          | -1.368842646 | 0.04192275078 |
| CTD-2514C3.1  | -2.222142808 | 0.04194898996 |
| RP11-84G21.1  | -1.530244352 | 0.04196204402 |
| BORCS7        | -1.703255918 | 0.04204337993 |
| SLC35D3       | -4.46357639  | 0.04210636138 |
| CLCN4         | -1.017580389 | 0.04216759745 |
| CNTNAP1       | -1.348060327 | 0.04218039325 |
| LINC01206     | -4.551707684 | 0.04221773341 |
| C15orf59      | -2.09205171  | 0.04257278328 |
| LINC01852     | -1.687920867 | 0.0426691845  |
| IGSF9         | -3.833904903 | 0.04272012445 |
| WEE2-AS1      | -1.371126783 | 0.04272802559 |
| ZSCAN30       | -1.133090654 | 0.04287216576 |
| MIPEPP3       | -1.459318041 | 0.0429307971  |
| AP000432.1    | -1.255746825 | 0.0431367002  |
| ZBTB20        | -1.134427569 | 0.04320818754 |
| HYAL1         | -3.016854124 | 0.04326354761 |
| NFIA-AS2      | -4.690934248 | 0.04341261462 |
| HSD11B1L      | -1.169662346 | 0.04341275038 |
| RP11-685N10.1 | -1.873748264 | 0.04343756073 |
| RP5-884C9.2   | -4.67028136  | 0.04372566592 |
| RP11-770J1.3  | -1.978003662 | 0.04376810314 |
| CCDC157       | -1.924673812 | 0.04387464067 |
| RP11-369K16.1 | -4.378477827 | 0.0439055597  |
| LINC00519     | -4.174203244 | 0.04414826492 |
| RP11-712B9.2  | -1.681867447 | 0.04438495977 |
| ZSCAN9        | -1.143102764 | 0.04440547237 |
| CORO1C        | -1.371073466 | 0.04444309768 |
| NRXN2         | -3.265152575 | 0.04446223563 |
| KALRN         | -2.765885882 | 0.04446223563 |
| POC1B-AS1     | -1.487207304 | 0.04446223563 |
| ROBO2         | -3.104746093 | 0.04512684457 |
| MCTP2         | -3.767260804 | 0.04523505001 |
| NREP          | -2.461486964 | 0.04536548297 |
| AKAP9         | -1.053334069 | 0.04537460484 |
| OTOGL         | -3.202638704 | 0.04566219905 |
| AGBL4         | -3.874891035 | 0.04569855501 |
| FGFR1         | -1.811983801 | 0.04574920331 |
| MYO5A         | -1.8759313   | 0.0457881529  |
| RP11-359B12.2 | -1.014373795 | 0.04585671536 |
| TPST2         | -1.635293308 | 0.04596908844 |
| CTC-344H19.4  | -3.534171212 | 0.046018976   |
| AC007566.10   | -1.014212726 | 0.04603914804 |
| RNF219-AS1    | -4.287346862 | 0.04607192115 |
| HEY1          | -1.938937907 | 0.04610567765 |
| CCDC93        | -1.053906336 | 0.04613359129 |
| IL1RAPL2      | -4.641402639 | 0.046158938   |
| SLC2A10       | -1.896922159 | 0.04618397365 |
| RANBP3L       | -4.054300833 | 0.04627817694 |
| MSI1          | -1.269715637 | 0.04628176266 |
| COL4A5        | -1.165371807 | 0.0462852139  |
| LINC02082     | -2.0766378   | 0.04636223328 |
| ADAMTS14      | -3.460689324 | 0.04636286823 |
| HES6          | -1.291320261 | 0.04637935409 |

|                     |              |               |
|---------------------|--------------|---------------|
| <b>PTPN13</b>       | -1.817108422 | 0.04651237249 |
| <b>NCK1-AS1</b>     | -1.304319419 | 0.04651237249 |
| <b>CCND2-AS1</b>    | -3.947812765 | 0.04700024178 |
| <b>AC018804.6</b>   | -3.27395259  | 0.04707095723 |
| <b>VEZF1P1</b>      | -1.223038487 | 0.04722431029 |
| <b>THRB</b>         | -2.247924883 | 0.04737934441 |
| <b>FAM189A1</b>     | -3.061011094 | 0.04790594259 |
| <b>GFAP</b>         | -4.644488325 | 0.04797167238 |
| <b>KLHDC1</b>       | -1.635443325 | 0.0484250351  |
| <b>NRBP2</b>        | -1.153527038 | 0.04855267055 |
| <b>BCL11A</b>       | -2.418681084 | 0.04862494178 |
| <b>LINC01252</b>    | -2.073475688 | 0.04871208694 |
| <b>ZBTB21</b>       | -1.040193851 | 0.04872465371 |
| <b>SKIDA1</b>       | -1.19451375  | 0.04872465371 |
| <b>PTP4A1</b>       | -1.179304474 | 0.0489195171  |
| <b>RGS11</b>        | -4.442310826 | 0.04898101713 |
| <b>ZBBX</b>         | -3.102530499 | 0.04909249068 |
| <b>RP5-994D16.3</b> | -2.841919319 | 0.04942585422 |
| <b>HS6ST1</b>       | -1.229941371 | 0.04945159219 |
| <b>TCEAL8</b>       | -1.00031066  | 0.04956146826 |
| <b>MAGED2</b>       | -1.077604338 | 0.04959084528 |
| <b>STAC3</b>        | -1.509375238 | 0.04968037008 |
| <b>BTBD19</b>       | -2.424382464 | 0.04970254872 |
| <b>ALDH3A1</b>      | -3.812078314 | 0.0497637965  |
| <b>SHISA9</b>       | -4.285136647 | 0.04994722536 |

**Supplementary Table 6:** Highly expressed (multi-exon) genes in mesenchymal (MES) and proneural (PN) GSCs ( $\log_2FC > 3$  and  $FDR < 0.05$ ), with expression differences between MES and PN GBM ( $|\log_2FC| > 0$ ).

| Highly expressed genes in MES |             |          |            |
|-------------------------------|-------------|----------|------------|
| gene                          | GSCs.log2FC | GSCs.FDR | GBM.log2FC |
| ANPEP                         | 10.3767     | 1.99E-70 | 2.09953    |
| CDCP1                         | 10.4075     | 4.38E-70 | 1.38869    |
| SLFN11                        | 10.6064     | 5.23E-70 | 0.11886    |
| FOSL1                         | 6.6273      | 6.26E-67 | 1.55408    |
| TGM2                          | 8.0496      | 2.47E-62 | 1.21532    |
| ALDH1A3                       | 9.6937      | 4.46E-58 | 1.68304    |
| CTSZ                          | 9.2329      | 3.20E-56 | 1.47754    |
| FGF5                          | 9.9146      | 9.77E-56 | 0.53909    |
| MDFIC                         | 8.2457      | 1.49E-53 | 1.36954    |
| DNAH14                        | 9.9210      | 1.48E-51 | 0.35166    |
| HTATIP2                       | 9.5804      | 1.73E-51 | 0.50266    |
| PROCR                         | 6.3594      | 3.17E-47 | 0.81380    |
| C4orf32                       | 9.2232      | 2.46E-46 | 0.57075    |
| PLBD1                         | 9.3612      | 1.24E-45 | 1.47594    |
| MAGEB2                        | 10.4771     | 4.67E-45 | 0.46958    |
| TNFRSF10D                     | 9.8447      | 5.15E-42 | 1.22471    |
| EGR1                          | 5.8680      | 5.36E-42 | 0.71143    |
| STEAP2                        | 10.0367     | 3.45E-41 | 1.10119    |
| TUSC3                         | 10.1375     | 3.85E-41 | 0.17589    |
| BAIAP2L1                      | 6.3678      | 1.04E-40 | 0.93680    |
| MAGEA12                       | 8.8877      | 2.63E-40 | 0.05420    |
| SSH3                          | 6.3416      | 1.85E-39 | 0.53649    |
| ME1                           | 9.9955      | 1.63E-37 | 0.49086    |
| AIM1                          | 4.4846      | 2.27E-37 | 1.72706    |
| KRT8                          | 9.6747      | 7.60E-37 | 1.07739    |
| DSP                           | 8.7318      | 1.50E-36 | 0.48866    |
| ADIRF-AS1                     | 8.1469      | 3.93E-36 | 0.30912    |
| EFEMP1                        | 10.9410     | 1.18E-35 | 1.50093    |
| PRAME                         | 11.3030     | 2.28E-34 | 1.27959    |
| LY6K                          | 9.0424      | 1.69E-33 | 0.27941    |
| NFE4                          | 9.9765      | 6.41E-33 | 0.97714    |
| KCNC4                         | 5.7273      | 8.91E-32 | 0.04717    |
| LRRK1                         | 8.5715      | 1.06E-31 | 0.65678    |
| VRK2                          | 8.8949      | 2.36E-30 | 0.63973    |
| FAT4                          | 6.4036      | 2.76E-30 | 0.72110    |
| CDYL2                         | 4.0989      | 3.66E-30 | 0.17782    |
| DOCK5                         | 9.9519      | 4.36E-30 | 0.62253    |
| KATNAL1                       | 3.9237      | 2.47E-29 | 0.14296    |
| RAB11FIP1                     | 7.7864      | 5.32E-29 | 1.16974    |
| RP11-29H23.5                  | 5.5037      | 1.10E-28 | 0.27002    |
| EGFR                          | 8.0550      | 2.38E-28 | 0.87717    |
| GALNT6                        | 9.5208      | 5.22E-28 | 0.90483    |
| KRT18                         | 10.4865     | 8.62E-28 | 1.19541    |
| STEAP1B                       | 7.7408      | 1.01E-27 | 0.12919    |

| Highly expressed genes in PN |             |           |            |
|------------------------------|-------------|-----------|------------|
| gene                         | GSCs.log2FC | GSCs.FDR  | GBM.log2FC |
| GPM6B                        | 10.7109     | 3.53E-127 | 0.0319     |
| PDE4B                        | 9.6990      | 7.76E-74  | 0.0007     |
| PMP2                         | 10.5275     | 1.69E-69  | 0.2675     |
| COL11A1                      | 9.8527      | 2.15E-68  | 1.0411     |
| ARNT2                        | 9.1545      | 4.87E-65  | 0.1831     |
| PTPRZ1                       | 10.2884     | 1.65E-64  | 0.4263     |
| PRTFDC1                      | 10.0067     | 1.29E-63  | 0.3787     |
| KCNJ10                       | 9.8793      | 2.84E-63  | 0.4904     |
| KCNA2                        | 10.1004     | 1.60E-61  | 0.9668     |
| FEZ1                         | 10.1715     | 4.86E-57  | 0.3374     |
| BCAN                         | 10.2891     | 4.13E-56  | 1.3340     |
| EDNRB                        | 10.4157     | 1.47E-55  | 0.6797     |
| ZNF532                       | 10.7090     | 7.97E-54  | 0.2351     |
| ARL10                        | 8.2031      | 9.15E-54  | 0.5634     |
| PCDH15                       | 9.3152      | 3.32E-52  | 2.7574     |
| FXYD6                        | 9.9132      | 1.22E-51  | 1.1235     |
| OLIG2                        | 10.2669     | 3.17E-50  | 1.7045     |
| NLGN3                        | 7.8820      | 1.09E-49  | 0.6115     |
| TUBB2B                       | 10.3490     | 4.63E-46  | 0.5740     |
| LSAMP                        | 11.0931     | 2.38E-45  | 0.8173     |
| JAM3                         | 10.0985     | 3.23E-45  | 0.1004     |
| VCAN                         | 10.5979     | 6.34E-45  | 0.0602     |
| GNG2                         | 10.3773     | 2.35E-44  | 0.8572     |
| SEMA5A                       | 8.6201      | 2.59E-44  | 0.4534     |
| SLC35F1                      | 9.9135      | 1.09E-43  | 0.9902     |
| OLIG1                        | 10.4094     | 1.77E-43  | 1.6634     |
| CSPG4                        | 9.9819      | 1.87E-43  | 0.3887     |
| SOX2-OT                      | 9.1016      | 5.55E-43  | 0.3283     |
| ANGPTL2                      | 10.2187     | 2.80E-42  | 0.1308     |
| MMP2                         | 10.5826     | 1.13E-41  | 0.1237     |
| ZNF608                       | 8.8905      | 3.60E-41  | 0.0877     |
| ZNF354C                      | 6.9885      | 3.01E-40  | 0.3125     |
| FREM2                        | 5.3429      | 1.36E-39  | 0.3714     |
| ZNF300                       | 11.0075     | 4.33E-39  | 1.1409     |
| MAP2                         | 8.5508      | 1.24E-37  | 1.0706     |
| MPHOSPH8                     | 9.9602      | 2.46E-37  | 0.0527     |
| ZNF334                       | 9.1671      | 2.52E-37  | 0.0701     |
| MDFI                         | 9.4470      | 2.61E-37  | 0.7509     |
| CELF2                        | 9.1976      | 3.31E-37  | 0.2632     |
| ZNF736                       | 10.0130     | 3.31E-37  | 0.3164     |
| SULF2                        | 9.4323      | 3.40E-37  | 0.7024     |
| ZNF542P                      | 8.2413      | 1.08E-36  | 0.0470     |
| FGFBP3                       | 4.8909      | 1.31E-36  | 1.1660     |
| SETD6                        | 7.3817      | 1.68E-36  | 0.2128     |

|              |         |          |         |              |         |          |        |
|--------------|---------|----------|---------|--------------|---------|----------|--------|
| ZDHHC23      | 5.8260  | 1.38E-27 | 0.58893 | SCRG1        | 11.0053 | 2.13E-36 | 0.4437 |
| ADM2         | 8.1786  | 3.47E-27 | 0.18935 | ANK3         | 5.4055  | 3.28E-36 | 0.5443 |
| RUNX3        | 7.9180  | 1.00E-26 | 0.46877 | VANGL2       | 10.0599 | 4.66E-36 | 0.4403 |
| FAM83G       | 8.1384  | 2.19E-26 | 0.91705 | DZIP1        | 10.4170 | 7.91E-36 | 0.2864 |
| TES          | 11.5896 | 2.98E-26 | 0.90344 | MLLT11       | 3.6619  | 1.41E-35 | 0.9375 |
| CASP4        | 5.4741  | 5.91E-26 | 1.14022 | LINC00511    | 4.7276  | 8.94E-35 | 0.6536 |
| MIPEP        | 3.6301  | 6.82E-26 | 0.42856 | PCDHGC3      | 8.3531  | 1.06E-34 | 0.4938 |
| ANKRD27      | 3.6217  | 2.55E-25 | 0.05869 | ARMCX4       | 9.5542  | 1.39E-34 | 0.6346 |
| NIPAL2       | 8.3632  | 1.11E-24 | 1.10676 | ZNF883       | 7.8610  | 2.51E-34 | 0.3449 |
| CADPS2       | 8.1288  | 1.94E-24 | 1.17465 | CPXM1        | 10.5931 | 2.90E-34 | 0.1185 |
| STAMBPL1     | 6.8045  | 2.61E-24 | 0.00945 | TTYH1        | 9.2750  | 3.37E-34 | 0.5267 |
| MAP3K21      | 4.4245  | 5.59E-24 | 0.40366 | RFTN2        | 9.4866  | 3.83E-34 | 0.5545 |
| SPAG1        | 4.6764  | 1.16E-23 | 0.77369 | SALL3        | 9.4843  | 7.54E-34 | 1.3368 |
| MAT1A        | 7.7902  | 1.41E-23 | 0.45222 | SOX5         | 10.4488 | 8.88E-34 | 0.7518 |
| MIR222HG     | 4.0647  | 3.46E-23 | 1.40482 | TNS2         | 5.2750  | 1.11E-33 | 0.0346 |
| IER3         | 8.7015  | 4.32E-23 | 1.17211 | LINC00665    | 6.5084  | 2.47E-32 | 0.3358 |
| CHAC1        | 5.2816  | 4.60E-23 | 0.37037 | ZNF93        | 6.9929  | 5.30E-32 | 0.4982 |
| PRKCH        | 6.3346  | 7.52E-23 | 0.39253 | ZCCHC24      | 3.6333  | 5.98E-32 | 0.2863 |
| DUSP23       | 7.1703  | 7.62E-23 | 0.98536 | DISC1        | 7.7497  | 6.46E-32 | 0.5254 |
| RP11-66B24.7 | 8.9782  | 8.13E-23 | 0.19592 | SALL2        | 10.1305 | 7.18E-32 | 0.1669 |
| GBP3         | 5.9100  | 1.02E-22 | 1.18576 | CHFR         | 4.3815  | 1.70E-31 | 0.2096 |
| CATSPER1     | 7.9869  | 1.24E-22 | 1.26298 | ZNF585B      | 5.8969  | 2.98E-31 | 0.0772 |
| ECHDC2       | 6.6816  | 1.60E-22 | 0.68730 | GNG7         | 3.5925  | 5.58E-31 | 0.3424 |
| DENND2C      | 5.8353  | 2.82E-22 | 0.21653 | COL9A3       | 10.8461 | 7.89E-31 | 0.6293 |
| ALS2CL       | 6.8183  | 3.48E-22 | 1.41048 | SV2A         | 10.5071 | 8.45E-31 | 0.4885 |
| LTBR         | 11.6376 | 4.79E-22 | 0.89730 | PNMAL1       | 10.6681 | 1.01E-30 | 0.4353 |
| G0S2         | 7.1054  | 5.12E-22 | 1.13372 | GPRC5B       | 6.2540  | 1.37E-30 | 0.2128 |
| AOX1         | 7.8808  | 9.45E-22 | 0.56697 | PCDH17       | 7.3463  | 1.62E-30 | 0.4427 |
| TPM2         | 4.7180  | 1.31E-21 | 0.70770 | PPP1R9A      | 10.2710 | 3.18E-30 | 0.2278 |
| DMKN         | 10.8580 | 2.40E-21 | 1.43401 | CGREF1       | 8.2704  | 5.04E-30 | 0.5471 |
| NME7         | 3.1848  | 4.21E-21 | 0.03588 | PROM1        | 9.5944  | 2.08E-29 | 0.5557 |
| RASGEF1A     | 11.3283 | 6.39E-21 | 0.12246 | ZNF431       | 10.5750 | 5.15E-29 | 0.5580 |
| SELENOM      | 6.4010  | 7.38E-21 | 0.92268 | SOX8         | 10.6199 | 6.31E-29 | 1.9157 |
| SIK1         | 4.7753  | 1.51E-20 | 0.61608 | CCDC149      | 9.6059  | 1.74E-28 | 0.0466 |
| IL4R         | 8.4823  | 1.84E-20 | 1.01604 | FRMD5        | 3.4701  | 2.15E-28 | 0.3661 |
| EMB          | 11.6151 | 2.13E-20 | 1.54406 | AIF1L        | 6.5808  | 5.14E-28 | 0.6226 |
| SERPINB9     | 8.0080  | 2.24E-20 | 0.75261 | DDX19B       | 7.0008  | 1.38E-27 | 0.0338 |
| PPARG        | 8.8885  | 2.51E-20 | 0.61278 | ZNF43        | 10.4614 | 1.44E-27 | 0.3268 |
| KCNG1        | 6.4498  | 2.70E-20 | 0.68860 | PAG1         | 6.0137  | 1.28E-26 | 0.3382 |
| MPP7         | 5.7031  | 3.90E-20 | 0.06112 | FLRT3        | 9.4041  | 1.57E-26 | 0.4117 |
| TNFRSF10A    | 11.1730 | 6.54E-20 | 1.06264 | ELMO1        | 10.3865 | 1.57E-26 | 0.9021 |
| CTGF         | 5.8601  | 1.69E-19 | 0.61500 | HUNK         | 8.5989  | 1.94E-26 | 0.7926 |
| PMAIP1       | 5.7864  | 1.71E-19 | 0.64524 | GTF2I        | 3.5369  | 1.97E-26 | 0.1669 |
| CSAG1        | 10.3953 | 2.24E-19 | 0.08240 | ARHGEF7      | 3.1696  | 2.19E-26 | 0.8176 |
| IL7          | 6.9248  | 2.84E-19 | 0.83074 | CERS6        | 11.6372 | 2.20E-26 | 0.1270 |
| RERG         | 6.4640  | 2.84E-19 | 0.70168 | FAM222A      | 4.4462  | 2.27E-26 | 1.8273 |
| NIPAL1       | 5.7869  | 3.62E-19 | 0.09044 | GREB1        | 4.5814  | 6.44E-26 | 0.3667 |
| PTPRH        | 6.8849  | 3.71E-19 | 0.93175 | COL20A1      | 8.5074  | 2.20E-25 | 2.6896 |
| PARP4        | 3.6642  | 3.83E-19 | 0.53202 | RP11-43F13.1 | 5.4935  | 2.46E-25 | 0.0034 |



|               |         |          |         |            |         |          |        |
|---------------|---------|----------|---------|------------|---------|----------|--------|
| TPBG          | 10.9432 | 3.92E-19 | 1.78491 | LINC00461  | 4.0718  | 3.20E-25 | 0.3884 |
| RP11-420A23.1 | 3.6846  | 4.13E-19 | 0.05179 | TCF4       | 6.3969  | 9.15E-25 | 0.3696 |
| TRIM58        | 9.1570  | 5.22E-19 | 0.41985 | PCYT1B     | 9.7393  | 1.14E-24 | 0.2838 |
| PCK2          | 4.0535  | 9.70E-19 | 0.52767 | STK32B     | 9.9483  | 1.30E-24 | 0.6871 |
| SERPINB1      | 6.8758  | 1.82E-18 | 1.17338 | C8orf46    | 7.5529  | 1.30E-24 | 0.7258 |
| BCL2A1        | 9.5784  | 2.28E-18 | 1.25019 | MAPK10     | 5.5778  | 2.41E-24 | 0.4253 |
| CHMP4C        | 10.6741 | 4.88E-18 | 0.67970 | SATB1      | 8.1516  | 2.44E-24 | 0.8926 |
| LINC00707     | 8.8163  | 5.03E-18 | 0.24621 | SLIT1      | 8.8588  | 2.97E-24 | 1.3022 |
| RCN3          | 4.9144  | 5.39E-18 | 1.15529 | C3orf70    | 9.8798  | 4.32E-24 | 0.6956 |
| SLFN12        | 9.8596  | 6.30E-18 | 0.68571 | DGKI       | 8.0565  | 4.98E-24 | 1.0900 |
| PLA2G16       | 3.4570  | 6.33E-18 | 0.41644 | ID4        | 9.6761  | 5.08E-24 | 0.4220 |
| MGST1         | 8.3238  | 7.62E-18 | 0.92754 | ASIC4      | 7.3633  | 6.89E-24 | 1.6741 |
| CT45A10       | 9.8426  | 8.52E-18 | 0.57785 | KCNIP1     | 10.4082 | 1.00E-23 | 0.4133 |
| CD40          | 9.8483  | 9.59E-18 | 0.80510 | FAM49A     | 9.7027  | 1.06E-23 | 0.0765 |
| MLPH          | 9.9790  | 1.03E-17 | 0.99098 | TMEM246    | 9.9217  | 1.46E-23 | 1.2458 |
| SPAG4         | 4.8318  | 1.24E-17 | 0.49310 | NLGN4X     | 11.2397 | 2.53E-23 | 0.0599 |
| H2AFJ         | 10.1085 | 1.58E-17 | 0.68030 | DTX3       | 9.4179  | 2.67E-23 | 1.7209 |
| TNFAIP2       | 4.5793  | 1.82E-17 | 1.63649 | PPP1R14C   | 11.0118 | 2.80E-23 | 0.4694 |
| ELL2          | 4.3705  | 1.84E-17 | 0.70862 | TET1       | 9.2650  | 4.27E-23 | 0.8858 |
| TBX18         | 10.5513 | 1.88E-17 | 0.86630 | ZNF738     | 11.1390 | 6.12E-23 | 1.0439 |
| LDHC          | 7.8273  | 2.32E-17 | 0.12632 | ZNF382     | 7.3153  | 6.23E-23 | 0.3182 |
| AC003092.1    | 10.5004 | 3.23E-17 | 0.97824 | SEMA5B     | 8.9971  | 6.86E-23 | 0.9562 |
| MAN1A1        | 5.9947  | 3.81E-17 | 1.56757 | LG12       | 9.6623  | 6.86E-23 | 0.0194 |
| LINC00857     | 8.3517  | 5.01E-17 | 1.19285 | HSD17B7P2  | 4.5378  | 7.26E-23 | 0.2911 |
| HS3ST3A1      | 8.2866  | 5.75E-17 | 0.49443 | NIM1K      | 6.8967  | 7.95E-23 | 0.2594 |
| WDR66         | 6.4268  | 7.31E-17 | 0.68652 | PEG3       | 9.7716  | 9.70E-23 | 0.8884 |
| RP5-884M6.1   | 9.7256  | 8.11E-17 | 0.50697 | KLHL13     | 7.7314  | 1.55E-22 | 0.5893 |
| MME           | 7.5809  | 1.13E-16 | 2.08298 | ZNF506     | 9.6657  | 3.80E-22 | 0.3161 |
| IL31RA        | 10.2933 | 1.31E-16 | 2.41949 | JAKMIP2    | 9.2861  | 4.60E-22 | 0.0455 |
| GFPT2         | 3.7890  | 2.39E-16 | 1.13101 | HR         | 8.4776  | 4.64E-22 | 1.4023 |
| CXCL5         | 9.8873  | 2.48E-16 | 2.06286 | B3GAT1     | 10.7366 | 7.25E-22 | 0.9428 |
| RP11-366H4.1  | 10.0323 | 3.19E-16 | 1.78157 | BCHE       | 6.7738  | 2.14E-21 | 0.4914 |
| DMC1          | 4.5325  | 3.59E-16 | 0.81462 | GOLGA8A    | 4.2395  | 2.24E-21 | 0.3784 |
| ZNF215        | 10.0254 | 3.62E-16 | 0.70861 | PDGFRA     | 7.7900  | 3.32E-21 | 2.7554 |
| EXT1          | 3.4344  | 3.92E-16 | 0.19825 | UNC80      | 6.8929  | 3.32E-21 | 0.8055 |
| CCDC68        | 8.2244  | 3.99E-16 | 0.44872 | RNF175     | 10.6522 | 7.91E-21 | 0.1974 |
| TMEM156       | 9.5593  | 5.31E-16 | 0.23005 | CD200      | 7.1215  | 1.07E-20 | 0.5397 |
| IRF5          | 7.0097  | 5.34E-16 | 0.66357 | ATCAY      | 8.8905  | 1.24E-20 | 1.9143 |
| FBXL13        | 4.0736  | 7.04E-16 | 0.46210 | TBCEL      | 10.5117 | 1.63E-20 | 0.0253 |
| RP11-108M9.4  | 6.8084  | 8.17E-16 | 0.65201 | LRRTM2     | 8.2571  | 1.96E-20 | 0.9006 |
| TM4SF19       | 8.1077  | 1.12E-15 | 0.83681 | PTPRO      | 9.4924  | 2.01E-20 | 0.5242 |
| UBR5-AS1      | 3.5689  | 1.20E-15 | 0.21289 | SEMA6A     | 3.7219  | 2.06E-20 | 0.3107 |
| ARNTL2        | 3.1121  | 1.27E-15 | 0.53968 | BRSK2      | 9.1250  | 2.23E-20 | 1.7043 |
| CD55          | 6.4161  | 1.55E-15 | 0.60302 | DPYSL2     | 3.2855  | 3.22E-20 | 0.0300 |
| HLA-F         | 3.7857  | 1.74E-15 | 0.76844 | ZNF577     | 4.7199  | 4.14E-20 | 0.2319 |
| ECHDC3        | 9.9163  | 1.95E-15 | 0.40381 | AC074289.1 | 6.6117  | 5.13E-20 | 0.2217 |
| LINC00944     | 9.8211  | 2.02E-15 | 0.31916 | DOCK10     | 5.3177  | 5.21E-20 | 0.2855 |
| HHEX          | 9.2847  | 2.09E-15 | 0.64843 | ZNF254     | 3.3001  | 5.92E-20 | 0.2384 |
| RP11-148B18.4 | 9.2308  | 2.71E-15 | 0.96897 | SHISA4     | 8.2521  | 6.07E-20 | 0.2450 |

|              |        |          |         |            |         |          |        |
|--------------|--------|----------|---------|------------|---------|----------|--------|
| TEC          | 9.7881 | 2.87E-15 | 1.38344 | BAALC      | 9.8395  | 8.66E-20 | 0.3276 |
| MSC-AS1      | 7.9784 | 5.06E-15 | 0.23046 | SLITRK2    | 10.0475 | 1.22E-19 | 1.1851 |
| SRGN         | 8.9991 | 5.33E-15 | 1.23161 | ZNF737     | 7.7906  | 1.36E-19 | 0.7210 |
| HTR7         | 9.0756 | 8.97E-15 | 1.20624 | MAGI2      | 4.6993  | 1.77E-19 | 0.3501 |
| KIRREL2      | 5.6129 | 9.91E-15 | 0.14202 | EFS        | 11.7172 | 2.19E-19 | 0.6064 |
| LINC01605    | 7.7660 | 1.00E-14 | 2.15906 | ZNF529     | 10.3714 | 2.19E-19 | 0.2753 |
| TOR4A        | 5.5083 | 1.13E-14 | 0.90684 | ZNF85      | 8.9232  | 2.41E-19 | 0.4293 |
| CASC9        | 9.5504 | 1.20E-14 | 0.62265 | KLHDC8B    | 5.1776  | 2.70E-19 | 0.2149 |
| RP11-66B24.2 | 9.6835 | 1.23E-14 | 0.44563 | SHROOM2    | 9.2579  | 3.70E-19 | 0.1916 |
| ANKRD29      | 5.0472 | 1.75E-14 | 0.95849 | ZNF853     | 9.4885  | 4.76E-19 | 0.4280 |
| CTB-140J7.2  | 9.0559 | 1.87E-14 | 0.75484 | ZNF100     | 10.1631 | 6.51E-19 | 0.4029 |
| PLCG2        | 9.5905 | 2.05E-14 | 0.77150 | ZNF813     | 5.7554  | 8.26E-19 | 0.1357 |
| MIR137HG     | 9.4635 | 2.91E-14 | 0.02217 | DPYSL3     | 5.0577  | 1.22E-18 | 0.0746 |
| RP4-647C14.2 | 9.4408 | 3.12E-14 | 0.05569 | GRIA3      | 9.6760  | 1.44E-18 | 0.5356 |
| ADGRE1       | 9.9151 | 3.80E-14 | 1.50048 | HS6ST2     | 11.4114 | 1.53E-18 | 0.0266 |
| WBP2NL       | 6.0319 | 3.81E-14 | 0.11438 | ZNF714     | 4.2606  | 2.14E-18 | 0.6874 |
| LINC00910    | 4.0521 | 4.78E-14 | 0.16762 | LGR5       | 7.8707  | 2.81E-18 | 2.1117 |
| ZNF185       | 4.0386 | 4.79E-14 | 0.93264 | SCN1A      | 9.3570  | 2.95E-18 | 0.5056 |
| MVP          | 4.6077 | 6.03E-14 | 1.09301 | ZNF677     | 9.1889  | 3.86E-18 | 0.4288 |
| VEGFC        | 8.8362 | 6.20E-14 | 1.18112 | NACAD      | 10.5509 | 4.41E-18 | 0.3061 |
| LRRC8E       | 8.8584 | 6.47E-14 | 2.36695 | ZNF528     | 10.1801 | 8.36E-18 | 0.0845 |
| XAGE1A       | 8.8426 | 6.51E-14 | 0.14350 | CTNND2     | 9.1880  | 1.14E-17 | 0.2969 |
| MTMR11       | 3.0034 | 8.69E-14 | 0.62618 | ZNF649     | 4.2395  | 1.14E-17 | 0.6281 |
| ADTRP        | 9.3155 | 9.03E-14 | 1.08193 | C1orf106   | 10.5447 | 1.19E-17 | 1.2267 |
| CRLF1        | 8.3375 | 1.05E-13 | 0.98678 | ZNF493     | 9.7959  | 1.61E-17 | 0.5381 |
| ANKRD33B     | 3.5772 | 1.07E-13 | 0.01018 | GAB1       | 3.0072  | 1.63E-17 | 0.4226 |
| SPOCD1       | 6.7388 | 1.11E-13 | 1.70761 | LINGO1     | 7.2119  | 1.66E-17 | 1.5168 |
| ENPEP        | 7.7342 | 1.37E-13 | 0.50792 | TNFRSF21   | 3.4698  | 2.52E-17 | 0.2299 |
| AC009237.8   | 9.3297 | 2.55E-13 | 0.39299 | TMEM100    | 10.9300 | 2.82E-17 | 1.2110 |
| CHRN1        | 3.3819 | 2.84E-13 | 0.28296 | GRIA2      | 6.4154  | 3.08E-17 | 1.0503 |
| POMP         | 3.0772 | 2.86E-13 | 0.28585 | RNF165     | 7.2100  | 3.16E-17 | 1.8203 |
| PI15         | 9.2873 | 3.53E-13 | 0.90130 | RNF182     | 10.3365 | 3.24E-17 | 0.5468 |
| UAP1         | 3.9178 | 3.56E-13 | 0.51545 | LRRC4      | 10.7217 | 3.37E-17 | 1.2425 |
| TYMP         | 7.7895 | 4.06E-13 | 1.06827 | NR2F1      | 4.2153  | 3.50E-17 | 0.0510 |
| TRDN         | 7.4584 | 4.29E-13 | 0.03248 | KCNK2      | 7.2431  | 3.93E-17 | 0.8776 |
| SYTL3        | 4.4968 | 4.53E-13 | 0.61531 | NPAS3      | 7.2149  | 5.70E-17 | 0.1145 |
| ADAMTSL5     | 4.5414 | 6.83E-13 | 0.53055 | NDRG4      | 6.0767  | 6.00E-17 | 0.3645 |
| NEXN         | 3.0647 | 7.17E-13 | 0.61634 | PHYHIPL    | 10.8925 | 6.17E-17 | 1.2116 |
| CYR61        | 5.2672 | 7.41E-13 | 1.02943 | IL17D      | 4.9250  | 7.23E-17 | 0.0384 |
| STARD8       | 4.2152 | 8.20E-13 | 0.72133 | ZNF90      | 10.2101 | 8.19E-17 | 0.8103 |
| TINAGL1      | 9.5074 | 8.94E-13 | 0.56862 | NCALD      | 8.9305  | 9.75E-17 | 0.8427 |
| C9orf84      | 8.6571 | 9.74E-13 | 0.02998 | HOXD10     | 6.5274  | 1.09E-16 | 0.4700 |
| XDH          | 9.8222 | 1.07E-12 | 1.69047 | AC018647.3 | 10.6295 | 1.29E-16 | 0.4354 |
| POLD4        | 4.0833 | 1.07E-12 | 0.80954 | EHD3       | 10.1748 | 1.42E-16 | 0.5472 |
| MICAL2       | 3.5865 | 1.11E-12 | 0.61134 | L3MBTL1    | 8.2847  | 1.44E-16 | 0.8110 |
| SULT1B1      | 9.0664 | 1.36E-12 | 0.81093 | AUTS2      | 6.3802  | 1.64E-16 | 0.1232 |
| PDLIM1       | 6.2795 | 1.36E-12 | 0.66582 | NLGN1      | 5.0599  | 1.80E-16 | 0.2593 |
| PIK3CD       | 4.1589 | 1.58E-12 | 0.60764 | HAGLR      | 10.3761 | 1.88E-16 | 1.2307 |
| MELTF        | 3.4979 | 1.83E-12 | 0.52782 | CLIP3      | 5.9451  | 1.96E-16 | 0.5690 |

|               |        |          |         |              |         |          |        |
|---------------|--------|----------|---------|--------------|---------|----------|--------|
| MARVELD2      | 6.1006 | 1.88E-12 | 0.79659 | CSGALNACT1   | 8.2324  | 2.10E-16 | 0.1920 |
| NPAS1         | 4.6011 | 1.93E-12 | 0.08459 | ZNF682       | 10.4208 | 3.19E-16 | 0.6207 |
| S100A11       | 7.0098 | 1.93E-12 | 1.20691 | NTRK3        | 9.1973  | 3.19E-16 | 0.3906 |
| RP11-221N13.  | 5.2213 | 1.97E-12 | 2.31656 | EFNB3        | 8.5914  | 3.21E-16 | 0.7890 |
| SPHK1         | 4.4370 | 2.09E-12 | 0.63231 | ZNF660       | 10.0700 | 3.32E-16 | 0.2745 |
| ARMC4         | 5.5312 | 2.15E-12 | 1.15290 | RAB33A       | 8.5766  | 3.40E-16 | 1.6957 |
| AP001065.15   | 8.3707 | 2.71E-12 | 0.52286 | P2RX7        | 9.1876  | 3.74E-16 | 0.9403 |
| CASC8         | 7.3916 | 2.71E-12 | 1.33385 | SOX21-AS1    | 10.6784 | 4.24E-16 | 0.3024 |
| RSPH9         | 6.5050 | 2.87E-12 | 0.15116 | PPFIBP2      | 3.6217  | 4.66E-16 | 0.0988 |
| STK26         | 6.4454 | 3.42E-12 | 0.69332 | UGT2B7       | 8.9569  | 6.58E-16 | 4.1225 |
| RBP7          | 7.1129 | 3.84E-12 | 0.15239 | ST8SIA5      | 7.8498  | 7.58E-16 | 0.9420 |
| KC6           | 8.7319 | 4.18E-12 | 1.18096 | ZNF329       | 6.0038  | 9.07E-16 | 0.2118 |
| SP100         | 5.2944 | 4.33E-12 | 1.00819 | SDHAP3       | 3.9054  | 9.40E-16 | 0.2353 |
| PERP          | 4.8009 | 4.47E-12 | 1.08670 | GRIA4        | 11.2092 | 1.27E-15 | 0.9964 |
| VSTM1         | 8.8560 | 4.48E-12 | 1.60418 | ZNF829       | 9.8596  | 1.31E-15 | 0.3077 |
| DAW1          | 9.2501 | 4.94E-12 | 0.25744 | SNX32        | 7.3539  | 1.40E-15 | 0.9148 |
| SLC27A6       | 8.4641 | 5.81E-12 | 1.35163 | COL9A2       | 4.6757  | 1.53E-15 | 0.3980 |
| RP11-879F14.2 | 7.1677 | 5.85E-12 | 0.55834 | ZNF626       | 10.1387 | 1.63E-15 | 0.0446 |
| FMNL1         | 5.7755 | 6.05E-12 | 0.93437 | ZNF513       | 4.8104  | 2.35E-15 | 0.2064 |
| GFI1          | 3.3699 | 6.06E-12 | 0.65206 | C2orf72      | 3.5854  | 2.43E-15 | 0.3489 |
| FOXL1         | 8.9092 | 7.98E-12 | 0.30968 | TUBA1A       | 3.4934  | 2.64E-15 | 0.7098 |
| LINC01615     | 8.2440 | 1.01E-11 | 1.64958 | TIMP4        | 10.3583 | 2.66E-15 | 0.7220 |
| IL18R1        | 5.7566 | 1.32E-11 | 1.39850 | LRRK2        | 3.4876  | 2.69E-15 | 0.9987 |
| PIWIL4        | 3.8146 | 1.37E-11 | 0.38059 | CDIP1        | 4.5098  | 2.72E-15 | 0.0397 |
| SLFN13        | 8.5979 | 1.62E-11 | 0.36084 | RP11-210M15  | 7.9611  | 2.74E-15 | 0.0025 |
| RAB32         | 3.7839 | 1.68E-11 | 0.75663 | PNMA2        | 9.7049  | 2.96E-15 | 0.0734 |
| SH3RF2        | 6.5459 | 1.76E-11 | 0.91868 | MAP3K1       | 4.2020  | 3.36E-15 | 0.4219 |
| ITGBL1        | 6.9545 | 1.95E-11 | 1.50077 | RRN3P1       | 10.0593 | 3.80E-15 | 0.3782 |
| CYP1B1        | 3.1027 | 2.12E-11 | 2.70550 | MEG3         | 9.8841  | 3.89E-15 | 0.4281 |
| MOXD1         | 6.0168 | 2.41E-11 | 1.93569 | DSEL         | 4.7687  | 3.96E-15 | 0.6453 |
| PAX2          | 8.6469 | 2.45E-11 | 1.13829 | AFG3L1P      | 3.0020  | 4.39E-15 | 0.2170 |
| RAD21L1       | 6.8840 | 2.52E-11 | 0.12328 | RAPGEF4      | 6.6078  | 4.48E-15 | 1.0553 |
| TBX1          | 6.2958 | 2.57E-11 | 0.66479 | RP11-161M6.2 | 9.8620  | 4.74E-15 | 2.0987 |
| CTD-2054N24.  | 8.4811 | 2.59E-11 | 0.84929 | FAM131B      | 8.2378  | 5.08E-15 | 0.6709 |
| STOM          | 3.0499 | 2.64E-11 | 1.13344 | EN2          | 10.4511 | 5.51E-15 | 0.2974 |
| RP11-1149O23  | 8.0683 | 3.64E-11 | 1.04664 | ZNF585A      | 9.4276  | 5.98E-15 | 0.2671 |
| LINC00704     | 8.7894 | 4.84E-11 | 0.52666 | NCAM1        | 7.3265  | 6.63E-15 | 1.0888 |
| TREM1         | 8.8492 | 4.89E-11 | 1.76455 | CHST11       | 3.1837  | 7.04E-15 | 0.3314 |
| TMEM56        | 4.6326 | 4.89E-11 | 0.36539 | LBH          | 10.0848 | 8.24E-15 | 0.2082 |
| LAMA3         | 4.5316 | 5.51E-11 | 1.18632 | PHLPP1       | 3.8485  | 8.98E-15 | 0.6619 |
| STEAP1        | 6.6997 | 7.55E-11 | 1.36881 | D2HGDH       | 10.1262 | 9.56E-15 | 0.2232 |
| FENDRR        | 8.8712 | 8.73E-11 | 0.35790 | DACT1        | 9.5438  | 9.59E-15 | 0.0176 |
| SLC44A3       | 4.8017 | 1.03E-10 | 0.45702 | GPM6A        | 4.8880  | 9.76E-15 | 0.6292 |
| DLX4          | 5.6057 | 1.04E-10 | 0.32022 | SLC16A9      | 10.2200 | 1.05E-14 | 0.2550 |
| TRPM2         | 8.1273 | 1.12E-10 | 0.93405 | ZSCAN16      | 9.6619  | 1.36E-14 | 0.5897 |
| PLAGL1        | 6.9078 | 1.13E-10 | 1.32230 | ZNF502       | 7.8406  | 1.38E-14 | 0.1671 |
| PRDM6         | 5.3578 | 1.15E-10 | 0.03644 | BMP7         | 9.0016  | 1.76E-14 | 0.7346 |
| IL22RA1       | 6.2705 | 1.25E-10 | 0.65651 | RLBP1        | 9.3865  | 1.78E-14 | 0.7819 |
| ADAMTS16      | 7.9713 | 1.27E-10 | 0.46750 | CADM2        | 5.9151  | 1.94E-14 | 1.2857 |

|              |        |          |         |              |         |          |        |
|--------------|--------|----------|---------|--------------|---------|----------|--------|
| HTR4         | 8.2785 | 1.62E-10 | 0.35549 | ZNF528-AS1   | 10.3361 | 2.16E-14 | 0.6251 |
| RP11-66B24.4 | 8.4112 | 1.78E-10 | 0.40107 | PROX1        | 9.5589  | 2.47E-14 | 0.4543 |
| SQRDL        | 3.7841 | 1.95E-10 | 0.97608 | COL9A1       | 10.6859 | 2.62E-14 | 1.5901 |
| PARM1        | 5.7665 | 1.96E-10 | 0.71548 | CTNNA3       | 9.2740  | 2.75E-14 | 1.3380 |
| PAWR         | 5.6944 | 2.04E-10 | 0.08806 | ID2          | 3.7187  | 2.82E-14 | 0.0559 |
| PITPNM1      | 3.3425 | 2.11E-10 | 0.33007 | ZNF501       | 9.1241  | 3.11E-14 | 0.3065 |
| MET          | 4.9643 | 2.68E-10 | 1.08407 | GRID1        | 9.1471  | 3.15E-14 | 0.3637 |
| HLX          | 8.3262 | 2.94E-10 | 0.97581 | RP11-275H4.1 | 9.0764  | 3.29E-14 | 1.5444 |
| NOX3         | 8.9502 | 3.13E-10 | 0.03972 | RHBDL3       | 9.3947  | 4.78E-14 | 1.2899 |
| HPSE         | 3.8411 | 3.35E-10 | 0.28960 | ZKSCAN7      | 9.5519  | 4.80E-14 | 0.5157 |
| TCIRG1       | 5.5480 | 3.44E-10 | 1.17082 | SARM1        | 4.8544  | 5.29E-14 | 0.5753 |
| CD109        | 5.1160 | 3.98E-10 | 1.47040 | GAREM2       | 9.5272  | 6.11E-14 | 1.1055 |
| SAMD3        | 8.2413 | 4.11E-10 | 1.12324 | VSTM2B       | 4.1424  | 7.38E-14 | 2.1009 |
| NAGS         | 4.3215 | 4.13E-10 | 0.53373 | PCDH7        | 5.0165  | 7.83E-14 | 0.8293 |
| PKP3         | 5.6250 | 4.20E-10 | 0.14105 | ADCY1        | 9.9584  | 1.06E-13 | 0.9362 |
| LPIN3        | 5.5421 | 4.30E-10 | 0.98350 | TMEM169      | 3.7359  | 1.21E-13 | 1.1852 |
| GADD45B      | 3.5069 | 4.44E-10 | 0.81728 | LRRTM3       | 10.1630 | 1.37E-13 | 0.6713 |
| CDK15        | 8.4831 | 4.56E-10 | 0.53994 | TRIM71       | 9.5583  | 1.45E-13 | 2.0498 |
| MAFK         | 3.0481 | 4.79E-10 | 0.43280 | SPSB4        | 9.1080  | 1.52E-13 | 1.2024 |
| RP4-756H11.3 | 3.0534 | 4.84E-10 | 0.17550 | DGKG         | 5.9959  | 1.70E-13 | 0.4023 |
| ICAM1        | 4.5536 | 4.92E-10 | 1.42324 | ZNF793       | 7.1076  | 1.97E-13 | 0.4239 |
| P4HA3        | 6.0223 | 5.15E-10 | 1.61087 | XYLT1        | 6.4044  | 2.29E-13 | 0.9167 |
| DUSP1        | 3.2867 | 5.55E-10 | 0.96551 | REEP2        | 9.5875  | 2.44E-13 | 0.0539 |
| INHBE        | 5.4392 | 5.77E-10 | 0.26902 | KCNH2        | 9.0491  | 2.81E-13 | 0.4182 |
| STXBP5-AS1   | 4.8328 | 6.31E-10 | 0.12152 | SESN3        | 4.6622  | 2.89E-13 | 0.0207 |
| MAGEA2B      | 8.0735 | 6.56E-10 | 0.10503 | EN1          | 9.4700  | 2.89E-13 | 0.3339 |
| SLC9A2       | 5.2851 | 7.06E-10 | 0.14593 | ZNF568       | 4.3216  | 3.53E-13 | 0.0487 |
| ATF7IP2      | 7.7065 | 8.31E-10 | 0.34324 | RASL10B      | 8.7738  | 3.54E-13 | 0.9736 |
| BNC2         | 6.4712 | 8.34E-10 | 1.85641 | SRSF12       | 8.9474  | 4.03E-13 | 0.8772 |
| SLC39A4      | 7.9315 | 9.21E-10 | 0.67107 | DCHS1        | 7.7898  | 4.62E-13 | 0.3531 |
| MICA         | 4.0906 | 9.23E-10 | 0.91722 | SPATA6       | 4.4386  | 4.74E-13 | 0.0022 |
| SHC1         | 3.0499 | 9.26E-10 | 1.32064 | BEND5        | 8.9503  | 5.12E-13 | 0.3565 |
| EFCAB10      | 6.8165 | 9.46E-10 | 0.38571 | LRRC37A2     | 5.2967  | 5.33E-13 | 0.3784 |
| ACSM3        | 3.8292 | 9.62E-10 | 0.44102 | NKX2-2       | 9.6302  | 5.42E-13 | 1.5421 |
| IL1R1        | 5.9772 | 1.01E-09 | 1.43425 | SOBP         | 3.0616  | 5.54E-13 | 0.2811 |
| KDELR3       | 3.0785 | 1.03E-09 | 1.84643 | LINC01896    | 8.7173  | 5.77E-13 | 1.0336 |
| KSR2         | 7.9345 | 1.23E-09 | 0.08929 | HILS1        | 9.0819  | 5.86E-13 | 1.1825 |
| ADAP2        | 3.3601 | 1.37E-09 | 0.86774 | AMPH         | 8.8405  | 7.46E-13 | 0.6070 |
| TUBA1C       | 3.4947 | 1.46E-09 | 0.66020 | TMEM200C     | 8.8834  | 8.01E-13 | 0.2599 |
| MYO1D        | 6.0931 | 1.52E-09 | 0.21667 | HAND2        | 9.2681  | 8.19E-13 | 1.6791 |
| PAPLN        | 5.0833 | 1.60E-09 | 1.11819 | CACNG4       | 9.3302  | 9.32E-13 | 1.3925 |
| CALB2        | 8.8031 | 1.76E-09 | 0.37906 | CA14         | 9.0907  | 1.00E-12 | 0.5940 |
| TMEM74       | 6.5994 | 2.05E-09 | 0.12750 | CSMD2        | 8.9198  | 1.01E-12 | 0.8205 |
| CCDC69       | 4.4912 | 2.15E-09 | 0.78682 | CAND2        | 8.9706  | 1.07E-12 | 0.3045 |
| SUN3         | 8.8427 | 2.25E-09 | 0.82984 | DAAM2        | 9.2434  | 1.12E-12 | 1.1223 |
| GATA6        | 7.9604 | 2.45E-09 | 1.65716 | NKAIN1       | 6.8598  | 1.16E-12 | 2.5212 |
| GLT8D2       | 3.5286 | 2.68E-09 | 1.15556 | CASC15       | 9.3361  | 1.20E-12 | 0.9993 |
| CD274        | 3.4145 | 2.86E-09 | 1.48593 | PLPPR5       | 8.8828  | 1.21E-12 | 1.1660 |
| OSCAR        | 6.0708 | 2.92E-09 | 1.11755 | RP3-525N10.2 | 6.6601  | 1.23E-12 | 0.9506 |

|               |        |          |         |               |         |          |        |
|---------------|--------|----------|---------|---------------|---------|----------|--------|
| COL6A4P1      | 7.7765 | 3.07E-09 | 0.19604 | ZNF730        | 8.7397  | 1.60E-12 | 1.1191 |
| ITGB2         | 8.4340 | 3.31E-09 | 1.06362 | PTPRD         | 6.1382  | 1.92E-12 | 0.6246 |
| TSPEAR-AS2    | 7.8613 | 4.06E-09 | 0.36782 | ATP1A2        | 8.8006  | 2.08E-12 | 0.2700 |
| TRABD2A       | 4.5479 | 4.49E-09 | 0.75556 | SPOCK1        | 9.2591  | 2.33E-12 | 0.3359 |
| ARHGAP40      | 6.4840 | 4.53E-09 | 0.84930 | PLXNB1        | 3.3105  | 2.56E-12 | 0.6963 |
| PPP1R13L      | 4.3014 | 4.60E-09 | 0.88316 | LURAP1        | 8.9325  | 3.59E-12 | 0.0707 |
| LINC00941     | 4.9017 | 5.11E-09 | 2.07034 | BEX4          | 10.6884 | 3.83E-12 | 0.3494 |
| PTGER4        | 7.7854 | 5.29E-09 | 1.41492 | ZNF610        | 5.5794  | 4.45E-12 | 0.5136 |
| TSPEAR-AS1    | 7.7208 | 5.64E-09 | 0.72689 | MOCS1         | 9.4612  | 4.60E-12 | 0.0860 |
| RP11-359K18.4 | 3.5296 | 5.78E-09 | 0.38844 | ACSBG1        | 8.6379  | 5.29E-12 | 0.2461 |
| OTX1          | 3.2848 | 6.08E-09 | 0.74048 | SLC8A3        | 8.9865  | 6.19E-12 | 1.9222 |
| HOXB6         | 7.3062 | 6.46E-09 | 2.46748 | TGFA          | 6.0371  | 7.26E-12 | 0.3010 |
| EFHD2         | 3.1133 | 6.64E-09 | 0.21980 | TENM1         | 7.6019  | 7.83E-12 | 0.0166 |
| RP1-102E24.8  | 7.9476 | 6.95E-09 | 0.69862 | PDZRN3        | 9.9060  | 8.74E-12 | 0.3727 |
| ADAMTSL4      | 4.7460 | 7.04E-09 | 0.97874 | RP11-629G13.1 | 8.3794  | 1.00E-11 | 0.2281 |
| CXCL3         | 7.7159 | 7.11E-09 | 2.25093 | ZNF253        | 3.3466  | 1.03E-11 | 0.5556 |
| TTC39B        | 3.3619 | 7.13E-09 | 0.40113 | PIANP         | 10.2584 | 1.06E-11 | 0.9088 |
| LBX2-AS1      | 4.2131 | 8.53E-09 | 1.01622 | TAS2R14       | 3.1716  | 1.10E-11 | 0.2839 |
| DNAAF3        | 5.3034 | 8.56E-09 | 1.17521 | APCDD1        | 9.5625  | 1.23E-11 | 0.4033 |
| TMEM171       | 5.9664 | 8.97E-09 | 0.42340 | ARHGAP42      | 4.0161  | 1.28E-11 | 0.2582 |
| CLCF1         | 3.8146 | 1.05E-08 | 1.92885 | MARC1         | 4.3412  | 1.41E-11 | 0.0629 |
| EML2-AS1      | 4.3363 | 1.09E-08 | 0.39496 | FADS2         | 3.0832  | 1.47E-11 | 0.6707 |
| RP11-809O17.1 | 4.2873 | 1.19E-08 | 0.54437 | AC108142.1    | 8.9199  | 1.48E-11 | 0.3438 |
| RHBDF2        | 4.0817 | 1.30E-08 | 0.93501 | RGR           | 8.6606  | 1.72E-11 | 1.7076 |
| PLEKHF1       | 3.8146 | 1.30E-08 | 0.87114 | LHFPL3        | 8.9140  | 1.74E-11 | 1.3649 |
| PDGFB         | 8.4485 | 1.33E-08 | 0.09174 | SCUBE2        | 5.4968  | 1.86E-11 | 0.1648 |
| DNAH5         | 4.5472 | 1.38E-08 | 0.87709 | LMO7          | 3.4354  | 1.95E-11 | 0.1850 |
| RP11-328K4.1  | 7.6249 | 1.43E-08 | 1.42516 | SORBS2        | 7.4168  | 2.11E-11 | 0.0332 |
| XAGE1B        | 7.2225 | 1.47E-08 | 0.48974 | CECR6         | 4.5632  | 2.13E-11 | 0.9829 |
| NNMT          | 6.4328 | 1.57E-08 | 1.40321 | PGAP1         | 3.7885  | 2.33E-11 | 0.5285 |
| NUP62CL       | 4.7448 | 1.73E-08 | 0.56300 | DCC           | 9.7748  | 2.74E-11 | 1.7475 |
| EML6          | 3.4257 | 1.85E-08 | 0.00246 | WLS           | 3.1537  | 2.75E-11 | 0.0592 |
| AREG          | 7.6153 | 2.07E-08 | 2.10910 | PKNOX2        | 4.0706  | 2.92E-11 | 0.6154 |
| ROR2          | 6.5743 | 2.26E-08 | 1.68472 | KIF5A         | 8.6173  | 2.92E-11 | 1.9538 |
| IL15RA        | 4.4728 | 2.73E-08 | 0.93722 | RIMS4         | 9.3407  | 3.16E-11 | 1.0504 |
| FXYD5         | 6.5201 | 3.17E-08 | 0.72357 | LINC01268     | 8.6508  | 3.20E-11 | 1.0059 |
| RHOV          | 3.6364 | 3.79E-08 | 0.02555 | RP11-436K8.1  | 9.1534  | 3.66E-11 | 0.9481 |
| HPCAL1        | 3.3483 | 3.99E-08 | 0.25860 | NDRG2         | 6.3814  | 4.04E-11 | 0.7366 |
| GPRC5C        | 6.5335 | 4.39E-08 | 0.07639 | ZNF572        | 8.6191  | 4.10E-11 | 0.3987 |
| RSPO4         | 6.4663 | 4.69E-08 | 0.06196 | CRB1          | 5.5053  | 4.53E-11 | 1.1383 |
| IL15          | 4.6191 | 4.74E-08 | 1.30654 | PRKAR1B       | 3.2596  | 4.53E-11 | 0.3520 |
| IFNLR1        | 7.0706 | 4.75E-08 | 0.15995 | FAM212B       | 5.5954  | 4.87E-11 | 0.8427 |
| LGALS2        | 7.3620 | 5.03E-08 | 0.74371 | CDH19         | 9.5057  | 5.31E-11 | 1.0267 |
| CDH23         | 6.1274 | 5.32E-08 | 0.19479 | TRIM60P18     | 8.4817  | 5.59E-11 | 0.4083 |
| SPEF2         | 3.7867 | 5.41E-08 | 0.61324 | PLEKHB1       | 3.0276  | 5.60E-11 | 0.3401 |
| SLC46A3       | 4.1293 | 5.57E-08 | 0.53603 | FAXC          | 9.1687  | 5.80E-11 | 0.8637 |
| STAT6         | 3.1710 | 6.07E-08 | 0.92170 | TAGLN3        | 4.5196  | 6.20E-11 | 1.3246 |
| GLRX          | 3.5698 | 6.16E-08 | 0.90019 | DMRT2         | 9.0008  | 6.27E-11 | 2.1949 |
| SMAGP         | 4.5082 | 6.23E-08 | 1.07167 | CYP4F29P      | 5.6892  | 6.45E-11 | 0.5092 |

|               |        |          |         |              |        |          |        |
|---------------|--------|----------|---------|--------------|--------|----------|--------|
| OPLAH         | 5.8987 | 6.56E-08 | 0.88836 | FAT3         | 9.3400 | 6.50E-11 | 0.4182 |
| MID2          | 3.7419 | 6.95E-08 | 0.18382 | CADM4        | 3.9640 | 6.66E-11 | 0.4446 |
| CTD-2207P18.  | 7.5549 | 6.98E-08 | 1.20368 | CDH7         | 9.8256 | 6.92E-11 | 2.1405 |
| UPK1A-AS1     | 7.0642 | 6.99E-08 | 0.34326 | ZNF704       | 3.5358 | 7.48E-11 | 0.7691 |
| CTD-2587H24.  | 7.5136 | 7.00E-08 | 0.81242 | ASTN1        | 8.6825 | 7.52E-11 | 0.3163 |
| ITPR3         | 3.8592 | 7.40E-08 | 1.17806 | GTF2IP4      | 3.2013 | 7.59E-11 | 0.3442 |
| ATP8B3        | 4.1052 | 7.62E-08 | 0.65853 | CTD-2561J22. | 8.1815 | 7.99E-11 | 0.3625 |
| TPRG1         | 4.3630 | 7.82E-08 | 0.93908 | ADGRB3       | 4.8490 | 8.56E-11 | 0.8661 |
| FLNC          | 5.1767 | 7.89E-08 | 0.06530 | CRYAB        | 9.0296 | 9.05E-11 | 1.1423 |
| CTD-2066L21.3 | 6.2857 | 7.90E-08 | 0.45914 | GTF2IP1      | 3.2675 | 9.27E-11 | 0.1797 |
| LINC00623     | 3.5339 | 9.56E-08 | 0.45178 | TMPRSS5      | 4.6847 | 1.08E-10 | 1.0040 |
| RP11-89C3.4   | 7.9437 | 1.01E-07 | 0.46369 | HOXD9        | 6.4103 | 1.10E-10 | 0.9914 |
| MSR1          | 7.5413 | 1.01E-07 | 1.11755 | KIF1A        | 7.6386 | 1.19E-10 | 0.9688 |
| CYB561        | 3.0926 | 1.23E-07 | 0.67475 | RP5-882C2.2  | 3.1466 | 1.50E-10 | 0.2545 |
| DNM1P46       | 6.0524 | 1.31E-07 | 0.81795 | DPY19L2P2    | 4.9521 | 1.52E-10 | 0.2943 |
| LINC01162     | 7.2061 | 1.50E-07 | 0.16915 | KCND2        | 8.8775 | 1.58E-10 | 1.3305 |
| RIN1          | 4.5521 | 1.54E-07 | 1.30710 | MIAT         | 7.6341 | 1.63E-10 | 1.3584 |
| LINC00702     | 6.8199 | 1.58E-07 | 0.66971 | C14orf37     | 3.9484 | 1.84E-10 | 0.1785 |
| CTD-2311M21.  | 7.2206 | 1.59E-07 | 1.16875 | PELI2        | 6.9494 | 1.84E-10 | 0.2385 |
| RNF212        | 6.8037 | 1.85E-07 | 2.20456 | HIST1H2BN    | 3.7792 | 1.96E-10 | 0.0916 |
| CTD-2303H24.  | 4.7042 | 1.86E-07 | 0.37253 | ZNF844       | 6.0859 | 2.68E-10 | 0.2944 |
| AADAC         | 7.3153 | 1.89E-07 | 1.18256 | ZNF66        | 8.1794 | 2.92E-10 | 0.8251 |
| SMCO4         | 4.1268 | 1.96E-07 | 0.47627 | ELAVL3       | 9.3812 | 3.04E-10 | 1.3824 |
| EOMES         | 7.1924 | 2.01E-07 | 1.46346 | EPHB3        | 5.1287 | 3.16E-10 | 0.6567 |
| PCED1B        | 4.2816 | 2.03E-07 | 0.94027 | XKR5         | 8.0891 | 3.27E-10 | 0.3656 |
| ATP2A3        | 4.0399 | 2.04E-07 | 0.81821 | BEX1         | 8.9516 | 3.33E-10 | 0.8387 |
| CXCL2         | 6.8877 | 2.13E-07 | 1.27004 | AC114730.3   | 8.5402 | 3.82E-10 | 1.4959 |
| FBXO6         | 3.1018 | 2.16E-07 | 0.35175 | ZBTB8B       | 8.1771 | 3.96E-10 | 1.2613 |
| EGFR-AS1      | 7.4675 | 2.19E-07 | 0.50939 | RP11-444D3.1 | 8.2187 | 4.12E-10 | 0.5984 |
| CXCL1         | 6.9777 | 2.35E-07 | 1.70101 | MOB3B        | 3.7949 | 4.68E-10 | 1.1832 |
| GLDN          | 4.7608 | 2.45E-07 | 0.40223 | RGS7BP       | 8.7483 | 5.58E-10 | 1.0360 |
| FAM26E        | 5.6769 | 2.53E-07 | 0.44452 | ST8SIA1      | 8.8617 | 5.73E-10 | 0.0034 |
| CLMP          | 3.0302 | 2.85E-07 | 0.85470 | CXXC4        | 4.4966 | 6.10E-10 | 1.2176 |
| SLFN5         | 4.7003 | 3.08E-07 | 0.31697 | CTC-559E9.5  | 8.3450 | 6.27E-10 | 0.2682 |
| NKX2-5        | 7.3178 | 3.14E-07 | 0.45745 | PCDHB5       | 8.0800 | 6.87E-10 | 0.1035 |
| CGB7          | 7.2236 | 3.32E-07 | 0.53395 | NT5C3A       | 3.0280 | 7.01E-10 | 0.0929 |
| RAP1GAP2      | 4.2926 | 4.12E-07 | 0.27833 | RNF150       | 3.9597 | 7.11E-10 | 0.7011 |
| CASZ1         | 3.6930 | 4.28E-07 | 0.44149 | XKR6         | 8.0416 | 7.17E-10 | 0.4426 |
| MICE          | 3.0837 | 4.31E-07 | 0.57472 | DYRK1B       | 3.2355 | 7.21E-10 | 0.2726 |
| SLC44A3-AS1   | 5.8306 | 4.44E-07 | 0.51389 | FAM198A      | 8.4606 | 7.23E-10 | 0.2534 |
| GSDMD         | 3.6357 | 4.65E-07 | 1.13360 | C8orf88      | 4.0395 | 1.03E-09 | 0.0678 |
| KCNK13        | 4.9745 | 5.17E-07 | 0.53223 | SLC44A5      | 8.0880 | 1.24E-09 | 0.6897 |
| PRR16         | 5.6007 | 5.50E-07 | 0.32534 | TMEM198      | 4.7412 | 1.24E-09 | 0.5905 |
| RP11-195E2.1  | 7.0573 | 5.59E-07 | 0.00305 | FREM1        | 6.7844 | 1.45E-09 | 0.5807 |
| TUBB6         | 3.2742 | 6.31E-07 | 0.62360 | CTC-260E6.6  | 8.0306 | 1.49E-09 | 1.0055 |
| BIK           | 5.9718 | 6.31E-07 | 0.49101 | HIP1         | 3.5911 | 1.55E-09 | 0.4058 |
| SBSN          | 5.8333 | 6.48E-07 | 1.36809 | GATS         | 3.2462 | 1.80E-09 | 0.7425 |
| MICB          | 4.3168 | 6.70E-07 | 0.45382 | ANKRD44      | 3.1967 | 1.94E-09 | 0.1252 |
| OSMR-AS1      | 4.8488 | 7.28E-07 | 0.71496 | GPC2         | 4.0585 | 2.00E-09 | 2.1590 |

|               |        |          |         |               |        |          |        |
|---------------|--------|----------|---------|---------------|--------|----------|--------|
| SLFN12L       | 6.5207 | 8.22E-07 | 0.54868 | FRAS1         | 8.2522 | 2.05E-09 | 0.4777 |
| TFAP2C        | 4.7326 | 9.35E-07 | 1.64091 | ZNF454        | 6.4384 | 2.17E-09 | 0.5752 |
| SIGIRR        | 4.5890 | 9.60E-07 | 0.33416 | SLC18A1       | 8.0049 | 2.19E-09 | 1.8850 |
| AC156455.1    | 4.6873 | 1.04E-06 | 0.09661 | AC092835.2    | 5.1002 | 2.35E-09 | 0.5628 |
| VAV1          | 6.4854 | 1.07E-06 | 0.97678 | DUSP26        | 8.5256 | 2.95E-09 | 1.5113 |
| SP8           | 6.6621 | 1.07E-06 | 1.09518 | FAM212B-AS1   | 6.8176 | 3.47E-09 | 1.1393 |
| MT2A          | 3.6851 | 1.13E-06 | 1.02600 | ZNF724        | 7.4443 | 3.66E-09 | 0.7671 |
| NOTUM         | 5.0570 | 1.15E-06 | 0.23494 | NGFR          | 6.4623 | 4.07E-09 | 0.2548 |
| PER1          | 3.0986 | 1.20E-06 | 0.05608 | TMEM179       | 9.2313 | 4.07E-09 | 0.8530 |
| PLEKHN1       | 5.3835 | 1.28E-06 | 0.95595 | GTF2IRD2B     | 3.7198 | 4.12E-09 | 0.1266 |
| PLAG1         | 3.4998 | 1.37E-06 | 0.28752 | ABAT          | 4.6746 | 4.30E-09 | 0.5108 |
| LINC00659     | 6.3653 | 1.52E-06 | 0.36044 | ATL1          | 3.0038 | 4.39E-09 | 0.5209 |
| CLDN1         | 4.9244 | 1.56E-06 | 0.74963 | C1orf61       | 6.8222 | 4.91E-09 | 1.1464 |
| NKD2          | 4.5440 | 1.60E-06 | 0.15834 | TMEM108       | 4.2999 | 4.96E-09 | 0.7762 |
| RP13-463N16.4 | 7.1209 | 1.64E-06 | 2.53901 | CALCRL        | 5.4109 | 5.14E-09 | 0.4515 |
| CSAG4         | 6.8927 | 1.65E-06 | 0.23911 | AMER2         | 8.8626 | 5.22E-09 | 0.7588 |
| CFH           | 4.4349 | 1.65E-06 | 1.99961 | LINC02199     | 7.5342 | 5.40E-09 | 1.4736 |
| GPR39         | 5.6888 | 1.65E-06 | 1.29320 | TECTA         | 7.7439 | 5.96E-09 | 0.6624 |
| ICOSLG        | 4.6778 | 1.73E-06 | 0.79175 | PLXNA4        | 8.4802 | 6.30E-09 | 0.3292 |
| DHRS3         | 6.6768 | 1.84E-06 | 0.78840 | ZNF781        | 7.8189 | 6.49E-09 | 0.6775 |
| PLBD1-AS1     | 6.9117 | 1.87E-06 | 0.80311 | NEU4          | 8.1025 | 7.29E-09 | 2.0569 |
| NUDT8         | 3.0040 | 1.91E-06 | 0.25522 | FGF13         | 7.4598 | 7.48E-09 | 0.6600 |
| COL17A1       | 6.7090 | 2.34E-06 | 0.95513 | LINC01550     | 8.0856 | 7.55E-09 | 0.1503 |
| LINC01036     | 6.8181 | 2.35E-06 | 0.04642 | RNF157        | 3.8457 | 8.58E-09 | 0.6021 |
| LINC01273     | 5.6801 | 2.37E-06 | 0.63868 | HFM1          | 3.7073 | 9.08E-09 | 0.8667 |
| PRSS16        | 4.8463 | 2.66E-06 | 0.33127 | YPEL3         | 5.0035 | 9.09E-09 | 0.0207 |
| CGB2          | 6.7473 | 2.68E-06 | 0.09861 | ZNF582-AS1    | 7.9035 | 9.86E-09 | 0.0312 |
| RP11-402J6.1  | 6.7575 | 2.72E-06 | 0.00690 | ARPP21        | 8.0378 | 1.10E-08 | 1.1399 |
| RP11-519M16.4 | 6.6977 | 2.85E-06 | 0.10229 | RP11-255H23.3 | 6.8037 | 1.10E-08 | 0.1298 |
| LINC00460     | 3.7294 | 3.14E-06 | 2.34298 | HOXA7         | 6.6787 | 1.11E-08 | 0.6904 |
| RP11-491I11.1 | 3.6175 | 3.44E-06 | 1.23603 | LINC01535     | 7.5876 | 1.12E-08 | 0.4357 |
| LRRC73        | 3.6485 | 3.74E-06 | 0.07918 | HYDIN2        | 7.6849 | 1.26E-08 | 0.7603 |
| P2RY2         | 4.9562 | 3.85E-06 | 0.76596 | NOVA1         | 3.1492 | 1.31E-08 | 0.8639 |
| TSPAN2        | 6.9370 | 3.93E-06 | 0.86914 | FBN3          | 9.0764 | 1.35E-08 | 2.0368 |
| RP11-326A19.4 | 4.3692 | 4.03E-06 | 0.27005 | HOXD8         | 8.4257 | 1.39E-08 | 1.3032 |
| WNT2B         | 3.0596 | 4.99E-06 | 0.03846 | NALCN         | 7.4851 | 1.39E-08 | 0.8309 |
| RP11-403I13.5 | 6.6077 | 5.12E-06 | 0.73730 | EMILIN3       | 8.2956 | 1.65E-08 | 0.5605 |
| RP11-802E16.3 | 3.8291 | 5.16E-06 | 1.32311 | LINC00403     | 7.6991 | 1.72E-08 | 1.1060 |
| HOXB4         | 4.0266 | 5.22E-06 | 0.77482 | RIC3          | 7.7844 | 1.90E-08 | 0.6547 |
| LBX2          | 5.4279 | 5.25E-06 | 0.37418 | KCND3         | 8.7450 | 2.18E-08 | 0.5605 |
| AKAP12        | 3.5825 | 5.60E-06 | 0.55671 | TRIM9         | 3.5552 | 2.26E-08 | 0.3551 |
| RP1-28O10.1   | 6.7406 | 5.65E-06 | 0.78494 | C1orf56       | 5.0005 | 2.65E-08 | 0.0309 |
| ZNF280A       | 6.2541 | 6.03E-06 | 0.50701 | HOXD11        | 6.6502 | 2.73E-08 | 0.3152 |
| LINC01037     | 6.2703 | 6.20E-06 | 0.26267 | CTD-2291D10   | 7.6979 | 2.78E-08 | 0.9282 |
| RP11-64D22.5  | 6.6702 | 6.25E-06 | 0.86965 | RP11-448P19.4 | 8.4664 | 2.88E-08 | 1.0048 |
| PTHLH         | 4.0268 | 6.74E-06 | 0.65102 | DAB1          | 8.1110 | 3.31E-08 | 0.9916 |
| LINC01703     | 3.0634 | 7.75E-06 | 0.32373 | KLRC4-KLRK1   | 7.8278 | 3.93E-08 | 2.4113 |
| LINC01186     | 6.3373 | 7.82E-06 | 0.77576 | RP11-472N13.3 | 7.8359 | 4.56E-08 | 0.4240 |
| PRKAG2        | 3.1083 | 7.97E-06 | 0.08830 | LINC01105     | 8.2108 | 4.78E-08 | 1.7989 |

|               |        |          |         |              |        |          |        |
|---------------|--------|----------|---------|--------------|--------|----------|--------|
| HSD17B14      | 3.7673 | 8.33E-06 | 0.18341 | SNTG1        | 8.8614 | 5.27E-08 | 0.7946 |
| DNAH17-AS1    | 6.6714 | 8.96E-06 | 0.02288 | PTPRD-AS1    | 7.5183 | 5.39E-08 | 0.6054 |
| AADACP1       | 7.0601 | 9.01E-06 | 0.78872 | CALM1        | 3.0456 | 5.56E-08 | 0.0535 |
| GAPLINC       | 6.4889 | 9.04E-06 | 0.91808 | MYO16        | 8.7609 | 5.90E-08 | 0.8936 |
| LL22NC03-86C  | 4.7270 | 9.25E-06 | 0.06886 | KCNAB3       | 3.5173 | 6.77E-08 | 0.5775 |
| AC073130.3    | 6.4422 | 9.95E-06 | 0.41210 | SYT11        | 3.3105 | 6.79E-08 | 0.3429 |
| PCDHB6        | 4.2842 | 1.01E-05 | 0.02358 | TNS3         | 5.1132 | 7.14E-08 | 0.1412 |
| SYNGR2        | 3.2551 | 1.09E-05 | 0.66154 | NEB          | 5.3591 | 7.60E-08 | 0.1503 |
| GATA3         | 4.5874 | 1.10E-05 | 1.71327 | TSPAN11      | 8.6156 | 7.61E-08 | 0.2543 |
| CH17-472G23.  | 3.3741 | 1.11E-05 | 0.22474 | DPP6         | 7.4481 | 7.77E-08 | 0.4283 |
| RP11-54A9.1   | 7.4821 | 1.12E-05 | 0.84593 | RPE65        | 7.0326 | 8.47E-08 | 0.0959 |
| RP5-113911.1  | 6.9312 | 1.15E-05 | 0.87108 | RAMP2-AS1    | 8.6078 | 8.64E-08 | 0.8693 |
| ADAMTS2       | 6.8356 | 1.19E-05 | 1.59596 | CNTFR        | 7.5948 | 1.15E-07 | 1.5436 |
| MSC           | 6.4187 | 1.20E-05 | 1.33238 | DDN          | 6.4851 | 1.16E-07 | 0.5959 |
| TMEM244       | 6.4465 | 1.22E-05 | 0.05625 | FHIT         | 3.5005 | 1.19E-07 | 0.3433 |
| ARHGAP29      | 4.9878 | 1.26E-05 | 0.96156 | DSCAML1      | 7.2674 | 1.21E-07 | 2.1167 |
| RAET1E        | 5.3568 | 1.26E-05 | 0.51016 | ZNF117       | 4.1204 | 1.28E-07 | 0.2252 |
| RP11-162D16.  | 6.4031 | 1.33E-05 | 0.17109 | CLEC4F       | 5.4765 | 1.28E-07 | 0.9937 |
| IGSF1         | 5.1187 | 1.34E-05 | 0.14123 | ID3          | 3.4081 | 1.45E-07 | 0.0594 |
| BTNL8         | 7.5868 | 1.36E-05 | 0.63913 | LINC01415    | 8.3713 | 1.48E-07 | 0.2638 |
| RP11-60A8.1   | 7.0596 | 1.42E-05 | 0.51943 | DACT3        | 4.7824 | 1.49E-07 | 0.6125 |
| SLC22A5       | 3.3562 | 1.46E-05 | 0.32027 | TOX3         | 8.5131 | 1.50E-07 | 1.7679 |
| MSL3P1        | 6.3580 | 1.60E-05 | 0.21881 | ZNF429       | 4.2291 | 1.58E-07 | 0.3861 |
| CD7           | 7.0995 | 1.67E-05 | 1.06078 | PCDHB12      | 4.4453 | 1.60E-07 | 0.1313 |
| CFD           | 4.5086 | 1.67E-05 | 0.76351 | RAMP2        | 7.9462 | 1.62E-07 | 0.3166 |
| RP11-134G8.5  | 3.1272 | 1.71E-05 | 0.41683 | CRABP1       | 8.2005 | 1.72E-07 | 0.9403 |
| NEBL          | 4.5224 | 1.73E-05 | 0.39882 | ADCYAP1R1    | 8.5689 | 1.84E-07 | 0.3659 |
| ITGB4         | 3.6401 | 1.84E-05 | 0.93519 | HAND2-AS1    | 7.8711 | 1.90E-07 | 2.2214 |
| NOXA1         | 4.5907 | 2.06E-05 | 0.40712 | CHRM1        | 7.2400 | 1.90E-07 | 1.3130 |
| EGFL7         | 3.3854 | 2.19E-05 | 0.07168 | TSPAN12      | 3.7919 | 2.02E-07 | 0.3340 |
| RP13-977J11.2 | 4.1660 | 2.22E-05 | 0.10188 | LRRC4C       | 4.8418 | 2.19E-07 | 0.3902 |
| XKR9          | 3.5744 | 2.41E-05 | 0.03847 | SNN          | 4.2931 | 2.19E-07 | 0.3341 |
| SENCR         | 6.0854 | 2.56E-05 | 0.54951 | CTC-543D15.8 | 7.5218 | 2.35E-07 | 0.3541 |
| GDPD5         | 3.0801 | 2.81E-05 | 0.04114 | ZNF790-AS1   | 7.2818 | 2.38E-07 | 0.2634 |
| EPS8L2        | 3.0850 | 2.89E-05 | 0.56857 | GPR156       | 5.1964 | 2.51E-07 | 0.4145 |
| AK7           | 3.8436 | 2.99E-05 | 1.62802 | GPR155       | 3.9442 | 2.57E-07 | 0.2467 |
| HIF1A-AS2     | 6.4048 | 3.20E-05 | 0.93856 | SCN3A        | 6.1302 | 2.60E-07 | 1.3950 |
| LAMP3         | 4.3737 | 3.20E-05 | 0.54071 | CTD-2017D11  | 3.9601 | 2.97E-07 | 0.3026 |
| RP11-527N22.  | 5.3391 | 3.42E-05 | 1.86058 | MAP1A        | 4.1960 | 3.39E-07 | 0.2694 |
| CTC-378H22.1  | 6.5346 | 3.76E-05 | 0.77472 | LRP4         | 3.7696 | 3.49E-07 | 0.5343 |
| SCNN1A        | 6.3063 | 3.76E-05 | 1.06684 | RP9P         | 3.2619 | 3.67E-07 | 0.1943 |
| CT45A1        | 6.2491 | 3.82E-05 | 0.04096 | PREX1        | 3.1199 | 3.81E-07 | 0.1445 |
| RP11-686D22.  | 6.1985 | 3.99E-05 | 0.63035 | ELAVL4       | 7.9681 | 4.13E-07 | 1.8819 |
| SLC22A4       | 3.3939 | 4.12E-05 | 0.88710 | SETBP1       | 7.6232 | 4.36E-07 | 0.1660 |
| LIF           | 3.3668 | 4.20E-05 | 2.20341 | STMN3        | 4.7661 | 4.59E-07 | 0.3862 |
| CTF1          | 3.8752 | 4.31E-05 | 0.90155 | STXBP6       | 3.5376 | 5.23E-07 | 0.5613 |
| MAGEA2        | 6.2260 | 4.32E-05 | 0.13708 | SRGAP3       | 3.7501 | 5.48E-07 | 0.6684 |
| BIRC3         | 4.0585 | 4.34E-05 | 1.60311 | DGKB         | 7.6371 | 5.55E-07 | 1.1143 |
| SERPINA1      | 5.9511 | 4.60E-05 | 1.55661 | LINC00391    | 7.1464 | 5.71E-07 | 0.0841 |



|               |        |          |         |               |        |          |        |
|---------------|--------|----------|---------|---------------|--------|----------|--------|
| AC012485.2    | 5.9237 | 4.79E-05 | 0.17227 | AC010729.1    | 7.2602 | 5.96E-07 | 1.2802 |
| AC007879.5    | 3.0746 | 4.97E-05 | 0.64791 | CDHR1         | 7.4998 | 6.31E-07 | 1.4757 |
| GPR18         | 6.1081 | 5.76E-05 | 0.86830 | RP11-617F23.  | 3.1248 | 6.90E-07 | 0.1808 |
| CEP126        | 4.7652 | 5.93E-05 | 0.24304 | KLRC4         | 7.7552 | 7.61E-07 | 2.6217 |
| SLC22A31      | 6.4044 | 6.21E-05 | 0.34994 | GTF2IRD2      | 3.8028 | 7.78E-07 | 0.1810 |
| TESC          | 4.0349 | 6.24E-05 | 0.14992 | C6orf52       | 3.7550 | 8.14E-07 | 0.3741 |
| TRIM6         | 3.3420 | 6.33E-05 | 0.83816 | RP11-480I12.9 | 3.3623 | 8.24E-07 | 0.4134 |
| MESP2         | 6.0640 | 6.39E-05 | 0.36358 | ZNF726        | 5.1484 | 8.73E-07 | 1.0421 |
| FHL2          | 3.3874 | 7.06E-05 | 1.20276 | RP11-611L7.2  | 4.3048 | 8.76E-07 | 0.4454 |
| AC073130.1    | 6.1266 | 7.07E-05 | 1.04707 | PNMAL2        | 7.4186 | 9.58E-07 | 0.4397 |
| RP11-280G9.1  | 6.1710 | 7.41E-05 | 1.05615 | RP11-966I7.2  | 7.1963 | 1.09E-06 | 0.2390 |
| CYB5R2        | 4.6067 | 7.55E-05 | 0.17376 | ZNF157        | 5.3077 | 1.20E-06 | 0.9451 |
| KLC3          | 6.1650 | 8.13E-05 | 0.49981 | RP11-25K19.1  | 5.4054 | 1.31E-06 | 0.5767 |
| SIRPB1        | 4.6753 | 8.27E-05 | 0.82802 | FAM69C        | 7.0490 | 1.36E-06 | 0.5424 |
| MYOSLID       | 6.2516 | 8.30E-05 | 2.13958 | RP11-4O1.2    | 4.6150 | 1.45E-06 | 0.0759 |
| RP11-818F20.5 | 5.8374 | 8.44E-05 | 1.07220 | GS1-24F4.2    | 6.7798 | 1.45E-06 | 0.9853 |
| APOL1         | 4.3252 | 8.46E-05 | 1.32488 | AP002954.3    | 3.3516 | 1.87E-06 | 0.7650 |
| SMPDL3B       | 4.6164 | 8.74E-05 | 0.37931 | H19           | 5.5332 | 2.07E-06 | 1.7596 |
| DUSP5         | 3.6861 | 8.81E-05 | 0.51111 | PHACTR1       | 6.1827 | 2.39E-06 | 0.3109 |
| CES3          | 3.0173 | 8.98E-05 | 0.89508 | PRSS35        | 7.5924 | 2.44E-06 | 0.3953 |
| NTRK1         | 3.8647 | 9.49E-05 | 0.83309 | LY6G5C        | 4.0832 | 2.57E-06 | 0.1481 |
| KRT34         | 6.1751 | 9.66E-05 | 0.00412 | SORCS3        | 7.4754 | 2.64E-06 | 1.0075 |
| RP11-336A10.5 | 6.0364 | 9.75E-05 | 0.52207 | PNMA6A        | 6.6648 | 2.84E-06 | 0.7500 |
| MICALCL       | 5.0957 | 0.0001   | 0.59789 | KLRC3         | 6.6607 | 3.13E-06 | 2.2619 |
| PKD1L2        | 4.0055 | 0.0001   | 0.62697 | RP11-126K1.6  | 3.7305 | 3.98E-06 | 0.5977 |
| C10orf11      | 3.2011 | 0.0001   | 0.77456 | PRR18         | 6.2981 | 4.25E-06 | 0.4771 |
| ROBO4         | 5.2538 | 0.0001   | 0.12160 | CD207         | 5.1787 | 4.26E-06 | 0.1910 |
| ARHGAP45      | 3.8997 | 0.0001   | 0.65857 | ZDHHC22       | 5.5338 | 4.32E-06 | 2.1002 |
| RP11-61A14.1  | 5.6362 | 0.0001   | 1.12198 | CBSL          | 3.9148 | 4.45E-06 | 0.7452 |
| TMEM200B      | 3.9049 | 0.0001   | 1.14820 | CHADL         | 6.8903 | 4.81E-06 | 0.8103 |
| TMEM40        | 6.6360 | 0.0001   | 1.03200 | AC078842.3    | 6.3127 | 5.01E-06 | 0.0614 |
| LRRC2-AS1     | 6.0330 | 0.0001   | 1.11174 | KCNN2         | 6.8005 | 5.19E-06 | 0.2585 |
| RFTN1         | 4.4093 | 0.0001   | 0.80631 | PLXNB3        | 3.4076 | 5.28E-06 | 0.6982 |
| NBL1          | 3.3932 | 0.0001   | 0.56873 | bP-21264C1.1  | 6.3355 | 5.33E-06 | 0.5720 |
| AXDND1        | 3.4909 | 0.0001   | 0.29095 | LA16c-306E5.2 | 6.6100 | 5.38E-06 | 0.0146 |
| LRRC2         | 4.2500 | 0.0001   | 1.51988 | SDPR          | 7.5806 | 5.40E-06 | 0.0461 |
| DEPTOR        | 3.9260 | 0.0002   | 0.56669 | MYCN          | 7.6341 | 5.43E-06 | 1.6800 |
| RP11-745L13.2 | 5.9655 | 0.0002   | 1.38492 | AC064875.2    | 8.2687 | 5.72E-06 | 0.3105 |
| EMBP1         | 4.8811 | 0.0002   | 0.82084 | SLC7A3        | 6.9869 | 5.97E-06 | 0.2299 |
| EVA1A         | 4.7347 | 0.0002   | 1.43955 | KANK1         | 3.0554 | 6.04E-06 | 0.5487 |
| RP11-43A14.1  | 4.3878 | 0.0002   | 0.03395 | PLCB1         | 3.1544 | 6.19E-06 | 0.8093 |
| PRR5          | 3.7224 | 0.0002   | 0.60505 | RP11-742D12.  | 6.6005 | 6.20E-06 | 0.8636 |
| MYOF          | 4.7477 | 0.0002   | 1.15184 | ZNF835        | 7.4776 | 6.31E-06 | 0.1419 |
| CAPN12        | 4.0013 | 0.0002   | 0.59287 | CCDC120       | 6.4450 | 6.40E-06 | 0.5659 |
| CTD-2128A3.2  | 5.9168 | 0.0002   | 2.28349 | CHST9         | 6.2616 | 6.75E-06 | 0.7348 |
| RP11-115J23.1 | 3.5955 | 0.0002   | 1.95127 | ADARB2        | 6.2533 | 7.07E-06 | 1.0284 |
| FAM19A3       | 3.1763 | 0.0002   | 0.56508 | LINCR-0001    | 3.5838 | 7.15E-06 | 1.0618 |
| RP3-414A15.2  | 5.8330 | 0.0002   | 0.56476 | AC073343.13   | 3.8178 | 7.97E-06 | 0.6155 |
| RP11-553A21.5 | 5.6687 | 0.0002   | 0.90011 | LINC01224     | 6.9425 | 8.32E-06 | 1.7384 |

|               |        |        |         |               |        |          |        |
|---------------|--------|--------|---------|---------------|--------|----------|--------|
| RPSAP52       | 4.1921 | 0.0002 | 2.23202 | PLD5          | 8.5602 | 8.78E-06 | 0.0531 |
| HRAT17        | 6.1954 | 0.0002 | 1.61930 | RP11-834C11.1 | 6.1942 | 9.19E-06 | 0.2289 |
| CD163L1       | 4.5323 | 0.0002 | 0.60903 | STXBP5L       | 7.4221 | 9.37E-06 | 1.0328 |
| GRIN3B        | 5.2058 | 0.0002 | 0.17320 | CAMK2B        | 5.9912 | 9.40E-06 | 0.2237 |
| TRANK1        | 3.3428 | 0.0002 | 0.63481 | NETO1         | 7.1856 | 9.45E-06 | 2.2945 |
| AC007879.2    | 4.3314 | 0.0002 | 0.76861 | RGCC          | 6.8124 | 9.92E-06 | 0.5416 |
| CDS1          | 4.5939 | 0.0002 | 0.46412 | ABCB6         | 3.3070 | 1.03E-05 | 0.3453 |
| SP6           | 3.2391 | 0.0002 | 1.14649 | USP32P1       | 7.1264 | 1.11E-05 | 0.7514 |
| SGMS2         | 4.0696 | 0.0003 | 1.30459 | ITIH6         | 6.5650 | 1.17E-05 | 2.3300 |
| NME3          | 3.5322 | 0.0003 | 0.25691 | ZNF578        | 5.7851 | 1.21E-05 | 1.0256 |
| KNDC1         | 4.6662 | 0.0003 | 0.31460 | ATOH8         | 6.2750 | 1.26E-05 | 0.5653 |
| AP1S3         | 3.4009 | 0.0003 | 0.49872 | DRAXIN        | 8.9395 | 1.30E-05 | 0.6659 |
| STX11         | 4.8646 | 0.0003 | 0.77466 | SGK2          | 6.7794 | 1.32E-05 | 0.6031 |
| C1orf204      | 3.4105 | 0.0003 | 0.37009 | CREB5         | 5.1852 | 1.33E-05 | 0.4064 |
| IL11          | 3.6329 | 0.0003 | 1.25543 | NKAIN4        | 5.7615 | 1.40E-05 | 1.7634 |
| CYP11A1       | 5.8125 | 0.0003 | 1.43145 | TMEM35A       | 6.1157 | 1.41E-05 | 1.2180 |
| AC006369.2    | 5.8652 | 0.0004 | 1.04352 | RP11-351J23.2 | 7.0082 | 1.41E-05 | 0.3510 |
| RP11-289F5.1  | 4.9677 | 0.0004 | 0.76085 | PROX1-AS1     | 6.4834 | 1.45E-05 | 0.0064 |
| CTC-378H22.2  | 5.8633 | 0.0004 | 0.71676 | ARHGAP19-SL   | 5.3366 | 1.54E-05 | 1.9297 |
| TSGA10IP      | 5.7246 | 0.0004 | 0.34301 | U52111.14     | 5.2091 | 1.56E-05 | 0.2236 |
| TNFRSF11A     | 3.9257 | 0.0004 | 1.21691 | CYP4F24P      | 7.6611 | 1.56E-05 | 0.1064 |
| APOBEC3D      | 5.2817 | 0.0004 | 1.20233 | PLA2G3        | 6.2217 | 1.61E-05 | 0.2056 |
| MSLN          | 5.7949 | 0.0004 | 1.41620 | CABLES1       | 3.0853 | 1.64E-05 | 0.3929 |
| RP11-195F19.9 | 4.4690 | 0.0004 | 0.37952 | APC2          | 3.4693 | 1.69E-05 | 0.6474 |
| ABCA5         | 3.4795 | 0.0004 | 0.54194 | RPS6KL1       | 7.4404 | 1.78E-05 | 1.4148 |
| AHNAK         | 3.8656 | 0.0004 | 0.91749 | RP11-268J15.3 | 3.1991 | 1.80E-05 | 0.0660 |
| AC009502.4    | 5.7300 | 0.0004 | 0.87633 | GABRA4        | 7.5780 | 1.88E-05 | 0.0433 |
| RGS4          | 3.9116 | 0.0005 | 0.79709 | C8orf31       | 6.7142 | 1.88E-05 | 0.2861 |
| IRF6          | 6.1764 | 0.0005 | 0.41778 | CLCN3P1       | 6.0025 | 2.00E-05 | 0.4349 |
| FAM3D         | 5.6514 | 0.0005 | 0.19854 | GABBR2        | 6.8660 | 2.02E-05 | 0.6836 |
| A2M-AS1       | 4.1688 | 0.0005 | 0.55337 | RP11-174J11.1 | 6.3288 | 2.05E-05 | 0.6565 |
| CRABP2        | 3.3717 | 0.0006 | 0.86578 | RP13-942N8.1  | 3.2657 | 2.40E-05 | 0.5635 |
| ODF3B         | 5.5390 | 0.0006 | 0.73959 | CH17-408M7.1  | 6.2584 | 2.57E-05 | 0.2412 |
| LINC01611     | 5.6653 | 0.0006 | 1.37590 | SRPK3         | 6.2343 | 2.83E-05 | 0.7928 |
| CYYR1-AS1     | 5.7963 | 0.0006 | 0.68461 | SYNPO2L       | 5.3327 | 2.88E-05 | 1.6004 |
| C4orf22       | 5.6398 | 0.0006 | 0.72873 | TMEM178A      | 4.8068 | 2.90E-05 | 0.2724 |
| CFAP58-AS1    | 5.2304 | 0.0006 | 0.14104 | TRIB2         | 4.9581 | 3.05E-05 | 0.5500 |
| XXyac-YX65C7  | 3.1524 | 0.0006 | 0.47664 | PTPRN2        | 6.1610 | 3.06E-05 | 0.2378 |
| AP001596.6    | 3.7945 | 0.0006 | 0.67843 | RP11-120J1.1  | 3.9745 | 3.13E-05 | 0.8404 |
| HLA-DRB1      | 5.7386 | 0.0006 | 1.22954 | C11orf87      | 7.4679 | 3.24E-05 | 0.2894 |
| TBC1D3P1      | 5.2911 | 0.0006 | 1.09975 | LPAR4         | 4.8136 | 3.33E-05 | 1.1740 |
| CTD-2020K17.1 | 3.5746 | 0.0007 | 0.87396 | C2orf80       | 6.8205 | 3.39E-05 | 1.0319 |
| ALDH1L1       | 3.9912 | 0.0007 | 0.56721 | KCNC1         | 5.2749 | 3.49E-05 | 1.0930 |
| VSIR          | 3.7961 | 0.0007 | 0.61088 | RHOU          | 3.1864 | 3.57E-05 | 0.0450 |
| LINC01385     | 5.2138 | 0.0008 | 1.07309 | ZNF793-AS1    | 6.7548 | 3.80E-05 | 0.9097 |
| LINC00887     | 4.7682 | 0.0008 | 0.75053 | CTD-2049O4.1  | 7.3214 | 4.22E-05 | 0.8453 |
| WT1           | 3.0548 | 0.0008 | 0.98865 | MPPED2        | 7.7375 | 4.31E-05 | 1.0711 |
| SERPINE1      | 4.0008 | 0.0008 | 1.81472 | AC004540.4    | 6.2826 | 4.39E-05 | 0.5345 |
| SH3TC1        | 3.3326 | 0.0008 | 0.71729 | SHISA7        | 4.8369 | 4.41E-05 | 2.3274 |

|               |        |        |         |               |        |          |        |
|---------------|--------|--------|---------|---------------|--------|----------|--------|
| IGFBP6        | 3.1734 | 0.0008 | 2.25711 | NOTCH4        | 3.3530 | 4.57E-05 | 0.0190 |
| MMP1          | 5.6339 | 0.0008 | 0.73956 | YBX2          | 4.0761 | 4.80E-05 | 0.8540 |
| ERC2          | 3.7846 | 0.0008 | 0.03046 | DRD2          | 7.2149 | 4.98E-05 | 1.4385 |
| RP11-288C17.  | 3.6279 | 0.0008 | 0.13041 | PDZD2         | 5.0823 | 5.00E-05 | 0.3173 |
| KCNQ1         | 4.0772 | 0.0008 | 0.73603 | PCDHA10       | 4.5743 | 5.05E-05 | 0.7852 |
| SERTAD4-AS1   | 4.4090 | 0.0008 | 1.03537 | PRRT4         | 4.4372 | 5.08E-05 | 0.4625 |
| ICAM3         | 3.6570 | 0.0009 | 0.75673 | RARB          | 6.1972 | 5.54E-05 | 0.1622 |
| USP32P2       | 3.8959 | 0.0009 | 0.50473 | SLC26A4-AS1   | 5.4537 | 6.07E-05 | 0.4367 |
| AMIGO2        | 3.2317 | 0.0009 | 1.31796 | HEY2          | 4.4143 | 6.08E-05 | 0.7923 |
| SPINT2        | 5.1454 | 0.0009 | 0.56944 | TLX1          | 6.9507 | 6.15E-05 | 1.4355 |
| RP11-1094H24  | 3.4360 | 0.0010 | 0.82410 | RP11-582J16.4 | 4.9402 | 6.60E-05 | 0.1800 |
| RP11-399K21.1 | 3.5805 | 0.0010 | 0.43195 | FAAH          | 3.0637 | 6.66E-05 | 0.8473 |
| SLC7A7        | 3.6085 | 0.0010 | 0.93479 | RP11-625L16.  | 6.2400 | 6.85E-05 | 1.8692 |
| EXPH5         | 3.5832 | 0.0010 | 0.19545 | CCDC188       | 6.7719 | 6.86E-05 | 0.7646 |
| TSPAN19       | 5.2938 | 0.0010 | 0.61481 | LRRC37A       | 4.0768 | 7.24E-05 | 0.2365 |
| RP5-1071N3.1  | 3.2324 | 0.0011 | 0.20494 | DIRC3         | 6.0294 | 8.08E-05 | 0.6085 |
| CNGA1         | 4.0856 | 0.0011 | 0.01097 | ZNF681        | 4.6648 | 8.20E-05 | 0.8585 |
| RP11-379B18.3 | 3.0185 | 0.0011 | 0.25385 | SLC24A2       | 4.9377 | 8.93E-05 | 0.2471 |
| RP11-320G24.  | 5.4414 | 0.0011 | 0.27479 | LINC00326     | 6.3146 | 9.07E-05 | 0.1436 |
| ZNF600        | 3.2265 | 0.0011 | 0.77642 | LGI3          | 5.8961 | 9.07E-05 | 0.9421 |
| CUL7          | 3.8050 | 0.0012 | 0.74510 | LINC00664     | 7.0364 | 9.29E-05 | 0.8471 |
| MTUS2-AS1     | 4.3280 | 0.0013 | 0.64259 | CABYR         | 5.8551 | 9.87E-05 | 0.6687 |
| RNLS          | 3.6791 | 0.0013 | 0.68962 | PLGLB1        | 6.1744 | 0.0001   | 0.6562 |
| SMC1B         | 3.5405 | 0.0013 | 0.13500 | FGF11         | 4.0648 | 0.0001   | 0.2315 |
| LINC01137     | 3.2354 | 0.0014 | 0.56905 | PLCD4         | 4.8351 | 0.0001   | 0.2321 |
| TMEM255B      | 3.6261 | 0.0014 | 0.59492 | AC108025.2    | 6.0174 | 0.0001   | 1.2788 |
| AC023590.1    | 5.4404 | 0.0014 | 0.58251 | GUCY1A2       | 3.9267 | 0.0001   | 0.4330 |
| RP11-26J3.1   | 3.1958 | 0.0015 | 0.16760 | BRINP2        | 7.4854 | 0.0001   | 0.4023 |
| RP11-108K3.1  | 5.3599 | 0.0016 | 0.28687 | TNR           | 6.0471 | 0.0001   | 2.2137 |
| SERPINB7      | 5.5530 | 0.0017 | 1.60606 | CTD-2380F24.  | 5.9619 | 0.0001   | 1.4868 |
| RGL3          | 3.2498 | 0.0018 | 0.72499 | CPNE5         | 4.9851 | 0.0001   | 0.8456 |
| ISG20         | 3.0068 | 0.0019 | 0.70550 | P2RX6         | 3.1143 | 0.0001   | 0.0903 |
| PHOSPHO1      | 4.9892 | 0.0020 | 0.37387 | HAS2-AS1      | 4.0856 | 0.0001   | 0.1556 |
| RP11-273G15.  | 4.3554 | 0.0020 | 0.53436 | LINC00844     | 6.5062 | 0.0001   | 0.8353 |
| SERPINB9P1    | 4.3809 | 0.0020 | 1.10637 | SLC6A1        | 6.2914 | 0.0001   | 0.4046 |
| GPR160        | 3.5211 | 0.0020 | 0.91619 | IGFBPL1       | 6.9162 | 0.0001   | 2.4912 |
| CTD-2589M5.5  | 5.0084 | 0.0020 | 0.93880 | EFHB          | 3.8856 | 0.0002   | 0.4369 |
| CT45A5        | 5.3070 | 0.0021 | 0.07938 | MN1           | 4.4432 | 0.0002   | 1.2035 |
| EFNA5         | 3.7005 | 0.0021 | 0.72212 | KCNH8         | 6.4337 | 0.0002   | 1.8099 |
| COL12A1       | 3.3791 | 0.0021 | 1.97470 | ARC           | 4.3217 | 0.0002   | 0.5959 |
| LMNTD2        | 3.3682 | 0.0021 | 0.75230 | SCN2A         | 5.7205 | 0.0002   | 0.5109 |
| RP11-276H7.2  | 4.8640 | 0.0022 | 1.09268 | TBX21         | 5.8877 | 0.0002   | 0.9926 |
| RP11-445O3.2  | 5.2975 | 0.0022 | 0.61157 | LMO1          | 5.9505 | 0.0002   | 1.8365 |
| MUC3A         | 3.8218 | 0.0022 | 0.19107 | HOXD-AS2      | 5.9413 | 0.0002   | 0.7560 |
| CFAP57        | 3.6191 | 0.0022 | 0.65972 | LINC00977     | 6.2199 | 0.0002   | 0.1053 |
| AC137932.6    | 4.9362 | 0.0023 | 0.04071 | SCG3          | 6.1874 | 0.0002   | 1.1116 |
| RNASE10       | 5.4559 | 0.0024 | 0.48354 | RP11-231C18.  | 6.0200 | 0.0002   | 1.6517 |
| FES           | 4.1992 | 0.0025 | 1.14158 | AC073283.4    | 5.9773 | 0.0002   | 1.1089 |
| RP11-686D22.  | 5.2272 | 0.0026 | 0.75118 | CDH4          | 5.0572 | 0.0002   | 0.2821 |

|               |        |        |         |               |        |        |        |
|---------------|--------|--------|---------|---------------|--------|--------|--------|
| TCHH          | 4.0853 | 0.0026 | 0.96130 | PROM2         | 4.2110 | 0.0002 | 1.3758 |
| NLRP3         | 3.5103 | 0.0027 | 0.58435 | FOXG1-AS1     | 6.0182 | 0.0002 | 0.4371 |
| TARID         | 5.1318 | 0.0028 | 0.68985 | TNKS2-AS1     | 3.7280 | 0.0003 | 0.3557 |
| RP11-568K15.1 | 3.2391 | 0.0030 | 0.92734 | TMEM132B      | 5.3763 | 0.0003 | 1.4219 |
| SLC16A3       | 3.7661 | 0.0030 | 0.86781 | SGCZ          | 6.7577 | 0.0003 | 0.2330 |
| ACAP1         | 4.8279 | 0.0030 | 0.66589 | TLX2          | 6.1123 | 0.0003 | 0.8312 |
| AP000695.4    | 3.4169 | 0.0032 | 0.55724 | ALPL          | 6.1093 | 0.0003 | 0.0626 |
| AC018816.3    | 5.1713 | 0.0032 | 0.82565 | GRIP2         | 5.6165 | 0.0003 | 1.3666 |
| RP11-565A3.2  | 5.2522 | 0.0032 | 0.22361 | IFI44L        | 6.8232 | 0.0003 | 0.2389 |
| TESMIN        | 3.9377 | 0.0032 | 0.78776 | RP11-698N11.1 | 5.9051 | 0.0003 | 0.7841 |
| PRDM9         | 5.1964 | 0.0033 | 0.00884 | HIF3A         | 6.0409 | 0.0003 | 0.2935 |
| BTC           | 4.1913 | 0.0033 | 0.50962 | ASXL3         | 6.5663 | 0.0003 | 1.0015 |
| SPATA4        | 3.1652 | 0.0034 | 0.37639 | CCDC144A      | 4.4431 | 0.0003 | 0.8893 |
| C15orf48      | 4.0123 | 0.0034 | 1.24892 | WFDC2         | 5.1275 | 0.0003 | 0.2908 |
| LINC01776     | 3.9838 | 0.0037 | 0.56968 | LINC01748     | 5.1733 | 0.0003 | 0.7891 |
| RP11-114H21.1 | 5.2812 | 0.0037 | 0.05373 | AC007204.2    | 6.2085 | 0.0003 | 1.1527 |
| DNAI1         | 3.3832 | 0.0037 | 0.17461 | RP11-838N2.5  | 6.0375 | 0.0003 | 0.4641 |
| AC005264.2    | 5.2786 | 0.0038 | 0.98056 | ZNF433        | 3.2226 | 0.0003 | 0.3425 |
| NLRP14        | 3.3960 | 0.0039 | 0.09753 | GPR162        | 3.2251 | 0.0003 | 0.4771 |
| VDR           | 3.1495 | 0.0041 | 2.20966 | ZBTB16        | 5.4963 | 0.0003 | 0.6482 |
| KRT80         | 3.6164 | 0.0042 | 1.60467 | DCT           | 4.3779 | 0.0004 | 1.7277 |
| NXNL2         | 3.7519 | 0.0043 | 1.21408 | TMEM178B      | 4.8848 | 0.0004 | 0.6946 |
| MYO1B         | 3.7254 | 0.0043 | 0.51001 | ZFP2          | 3.5856 | 0.0004 | 0.2171 |
| NBEAP1        | 3.0703 | 0.0045 | 0.30936 | MASP1         | 7.7266 | 0.0004 | 0.0686 |
| LINC01111     | 5.5117 | 0.0045 | 1.66477 | ESPN          | 4.8488 | 0.0004 | 0.4437 |
| RP1-137D17.1  | 5.0387 | 0.0046 | 0.21997 | APOL4         | 6.4464 | 0.0004 | 0.0385 |
| RP11-755F10.1 | 4.2900 | 0.0049 | 0.01045 | CAMKV         | 3.4023 | 0.0004 | 1.9006 |
| CAPN11        | 4.3936 | 0.0050 | 1.08441 | FLRT1         | 5.8128 | 0.0004 | 1.7925 |
| RP11-676J12.7 | 5.8714 | 0.0052 | 0.46775 | KCNIP4        | 6.3195 | 0.0004 | 0.3244 |
| MYCBPAP       | 3.2978 | 0.0055 | 0.79495 | ILDR2         | 3.6885 | 0.0005 | 0.4312 |
| MLKL          | 3.1180 | 0.0057 | 0.80525 | NEUROD1       | 5.8631 | 0.0005 | 1.1665 |
| PAPSS2        | 3.2313 | 0.0057 | 0.61965 | PLPPR3        | 6.0302 | 0.0005 | 2.4924 |
| NDNF          | 3.5747 | 0.0059 | 0.36658 | IKZF2         | 3.1807 | 0.0005 | 0.1809 |
| SOCS2         | 3.0625 | 0.0062 | 0.18757 | LINC01630     | 5.6072 | 0.0005 | 1.7337 |
| NPTX2         | 3.4776 | 0.0063 | 1.28670 | AC017104.6    | 3.3167 | 0.0006 | 0.4561 |
| AC131056.3    | 4.9942 | 0.0063 | 0.38697 | WNT7A         | 6.3405 | 0.0006 | 0.7564 |
| DEF6          | 3.6055 | 0.0066 | 0.88804 | ST3GAL5       | 3.3009 | 0.0006 | 0.2505 |
| MCOLN3        | 3.4780 | 0.0069 | 0.38890 | B3GALT2       | 5.2923 | 0.0006 | 1.1476 |
| ELF4          | 3.0632 | 0.0070 | 0.85559 | STON2         | 6.1040 | 0.0006 | 0.0009 |
| LINC01939     | 6.2742 | 0.0071 | 0.41921 | RP11-507K2.3  | 5.7402 | 0.0006 | 0.5577 |
| AC020571.3    | 4.5507 | 0.0072 | 1.23355 | WI2-1896O14.1 | 5.5978 | 0.0006 | 0.2526 |
| LRRIQ1        | 3.9182 | 0.0074 | 1.53367 | KCNJ9         | 5.9471 | 0.0006 | 1.7324 |
| RP3-467K16.2  | 4.4681 | 0.0075 | 0.56022 | SP9           | 5.9708 | 0.0006 | 2.1380 |
| AC092614.2    | 4.9414 | 0.0075 | 0.48941 | ADAMTS5       | 4.3736 | 0.0007 | 0.0579 |
| UNC93B3       | 3.6987 | 0.0077 | 0.37359 | ZFP30         | 4.0777 | 0.0007 | 0.3282 |
| ACTRT3        | 3.0419 | 0.0079 | 1.15920 | FGF14         | 5.7500 | 0.0007 | 0.3414 |
| NEK5          | 3.3218 | 0.0084 | 0.75995 | RFLNA         | 5.6907 | 0.0007 | 0.8682 |
| CNFN          | 4.9846 | 0.0085 | 0.49720 | HCG17         | 4.4801 | 0.0007 | 0.3996 |
| TFPI2         | 3.0829 | 0.0093 | 2.02646 | LIFR-AS1      | 3.0592 | 0.0007 | 0.3076 |

|               |        |        |         |               |        |        |        |
|---------------|--------|--------|---------|---------------|--------|--------|--------|
| SERTAD4       | 3.0394 | 0.0097 | 0.75212 | EFCAB5        | 4.1113 | 0.0007 | 1.2357 |
| RP11-460B17.2 | 4.4683 | 0.0097 | 2.16402 | WSCD1         | 3.5136 | 0.0008 | 0.7507 |
| IL1A          | 5.0092 | 0.0098 | 0.66339 | RP11-307B6.3  | 5.2974 | 0.0008 | 0.6533 |
| MAGEA4        | 5.5329 | 0.0098 | 0.33787 | IPCEF1        | 5.7150 | 0.0008 | 0.3759 |
| CTD-2540B15.1 | 4.0184 | 0.0099 | 0.77401 | CSPG5         | 3.6750 | 0.0008 | 1.1222 |
| SMIM1         | 5.0346 | 0.0101 | 1.09564 | ADCY8         | 4.3174 | 0.0008 | 0.2693 |
| SFTA1P        | 3.3467 | 0.0103 | 0.70429 | MIMT1         | 6.0754 | 0.0008 | 1.6634 |
| RP11-885N19.1 | 4.8961 | 0.0123 | 1.61159 | NXPH3         | 3.2696 | 0.0008 | 0.8535 |
| ITGAD         | 4.7187 | 0.0127 | 1.45897 | OLFM2         | 3.0780 | 0.0008 | 0.1989 |
| LGI4          | 3.2077 | 0.0127 | 0.01996 | NCAN          | 7.5679 | 0.0008 | 0.5057 |
| AC008592.3    | 4.6919 | 0.0128 | 0.93842 | MESTIT1       | 6.1561 | 0.0008 | 0.1114 |
| LINC01239     | 3.6509 | 0.0131 | 1.49952 | LRP1B         | 4.2071 | 0.0009 | 0.3226 |
| VNN1          | 4.2795 | 0.0135 | 1.06338 | LINC01102     | 5.9799 | 0.0009 | 1.0991 |
| COL13A1       | 3.0513 | 0.0136 | 2.05599 | ADGRG1        | 4.4408 | 0.0009 | 0.5186 |
| RP11-1398P2.1 | 4.2298 | 0.0140 | 1.10989 | NSG1          | 5.7824 | 0.0009 | 0.1387 |
| AP000442.4    | 3.4047 | 0.0141 | 0.28090 | LINC01158     | 3.5994 | 0.0009 | 0.3068 |
| GACAT2        | 3.2024 | 0.0144 | 0.11248 | TENM2         | 4.7292 | 0.0009 | 0.1128 |
| TWIST2        | 3.5408 | 0.0146 | 1.66808 | HOXA2         | 4.9391 | 0.0009 | 1.3967 |
| SPERT         | 4.8295 | 0.0146 | 0.94762 | SHD           | 5.4326 | 0.0010 | 2.0781 |
| GNA15         | 3.5866 | 0.0156 | 1.27382 | AP000289.6    | 6.1491 | 0.0010 | 1.6762 |
| SARDH         | 4.4588 | 0.0158 | 0.79471 | CTB-118P15.2  | 5.4817 | 0.0010 | 1.0792 |
| WNT4          | 3.1293 | 0.0161 | 0.88294 | CTC-467M3.1   | 5.6468 | 0.0010 | 0.5689 |
| OSMR          | 4.9351 | 0.0164 | 1.22204 | MCF2L         | 3.0785 | 0.0010 | 0.8547 |
| RP11-535M15.1 | 3.9291 | 0.0179 | 0.03152 | TMEM229B      | 3.1153 | 0.0010 | 0.2452 |
| NOS3          | 3.8761 | 0.0179 | 0.28895 | LINC00643     | 5.7984 | 0.0010 | 1.4408 |
| AC145343.2    | 3.7509 | 0.0183 | 0.53261 | LAMP5         | 6.1520 | 0.0010 | 0.0670 |
| AC002076.10   | 3.8424 | 0.0184 | 0.86434 | CH17-258A22.1 | 4.1065 | 0.0010 | 0.0446 |
| RP11-650K20.3 | 3.6152 | 0.0192 | 0.92055 | FAM185BP      | 3.0974 | 0.0011 | 0.0482 |
| LINC02057     | 4.1215 | 0.0193 | 0.39344 | PDE8B         | 3.7006 | 0.0012 | 0.2282 |
| PTER          | 4.6097 | 0.0197 | 0.16752 | AC053503.11   | 5.3923 | 0.0013 | 1.8829 |
| AC106786.1    | 4.1912 | 0.0198 | 0.46195 | CC2D2B        | 4.5274 | 0.0013 | 0.1065 |
| PIK3CG        | 4.3364 | 0.0200 | 0.71098 | RUNDC3A       | 5.3977 | 0.0013 | 1.4718 |
| CTD-2337A12.1 | 4.5371 | 0.0203 | 0.58038 | LEMD1         | 5.9745 | 0.0013 | 0.8117 |
| ITGB2-AS1     | 4.5937 | 0.0217 | 0.60709 | PSPC1P1       | 4.0416 | 0.0013 | 0.2474 |
| RP11-14N7.2   | 4.4781 | 0.0223 | 0.24367 | LINC00945     | 5.5410 | 0.0013 | 0.7030 |
| RP11-297A16.1 | 4.1983 | 0.0225 | 0.39012 | TSPOAP1       | 5.6147 | 0.0014 | 0.6303 |
| LLGL2         | 3.4688 | 0.0239 | 0.41053 | HOXD3         | 5.4949 | 0.0014 | 1.4608 |
| AC012358.4    | 4.4449 | 0.0262 | 0.00672 | RP4-657D16.3  | 3.7175 | 0.0014 | 0.3317 |
| RP11-89K11.1  | 3.4433 | 0.0263 | 0.31701 | HOXD4         | 5.4159 | 0.0015 | 1.3408 |
| MOV10L1       | 4.4441 | 0.0265 | 0.63408 | STUM          | 5.4701 | 0.0015 | 0.4918 |
| EBF2          | 3.6057 | 0.0267 | 0.15407 | TTBK1         | 4.7454 | 0.0016 | 0.7564 |
| GATA6-AS1     | 3.9957 | 0.0302 | 1.26542 | LFNG          | 4.4011 | 0.0016 | 0.1920 |
| RP3-467K16.7  | 4.4115 | 0.0304 | 1.50772 | DDR1          | 3.4264 | 0.0017 | 0.0309 |
| ADAMTS12      | 3.1979 | 0.0317 | 1.13029 | RP11-430H10.1 | 5.5299 | 0.0017 | 0.3254 |
| GPAT3         | 3.3176 | 0.0317 | 1.28396 | SERP2         | 6.0986 | 0.0017 | 0.6553 |
| FOXC2-AS1     | 4.5399 | 0.0319 | 1.07089 | CD101         | 5.3992 | 0.0017 | 0.2487 |
| WFDC21P       | 4.4383 | 0.0330 | 1.31817 | AP006222.2    | 5.4094 | 0.0017 | 0.1647 |
| RP11-95P2.3   | 4.3111 | 0.0331 | 1.02435 | CASQ1         | 5.8751 | 0.0018 | 0.3069 |
| SNX29P1       | 4.0409 | 0.0339 | 0.04275 | RPS6KA2       | 3.3976 | 0.0018 | 0.0586 |

|               |        |        |         |              |        |        |        |
|---------------|--------|--------|---------|--------------|--------|--------|--------|
| RP11-366F6.2  | 4.3428 | 0.0355 | 0.40639 | RP11-38M8.1  | 5.9893 | 0.0018 | 0.2782 |
| TMEM190       | 4.3686 | 0.0370 | 0.99047 | AP3B2        | 4.7431 | 0.0018 | 0.9162 |
| AC092168.2    | 3.8692 | 0.0382 | 0.68960 | JPH4         | 6.1414 | 0.0018 | 1.3734 |
| F2RL1         | 3.1439 | 0.0385 | 1.20420 | RXFP1        | 4.8677 | 0.0018 | 0.7205 |
| C19orf33      | 4.2328 | 0.0388 | 0.19382 | COL28A1      | 4.4945 | 0.0019 | 0.4136 |
| HLA-V         | 3.1816 | 0.0388 | 0.07377 | MIR181A2HG   | 3.0687 | 0.0020 | 0.8415 |
| CSF3          | 4.2738 | 0.0389 | 2.51381 | PRSS51       | 5.4016 | 0.0022 | 0.9272 |
| SIDT1         | 3.8411 | 0.0394 | 0.03443 | CTC-255N20.1 | 5.9100 | 0.0024 | 0.4790 |
| MED15P9       | 4.4181 | 0.0396 | 0.25970 | RUNX1T1      | 6.9975 | 0.0024 | 0.4504 |
| RP11-54O7.18  | 4.3049 | 0.0404 | 0.22346 | SOSTDC1      | 5.4086 | 0.0025 | 0.0885 |
| RP11-438D8.2  | 4.2184 | 0.0409 | 0.21019 | AVIL         | 3.5325 | 0.0025 | 1.2415 |
| RP11-150C16.  | 3.3217 | 0.0412 | 0.49684 | FMO5         | 3.4178 | 0.0026 | 0.2359 |
| EREG          | 4.2971 | 0.0415 | 3.12461 | ATP2B2       | 5.2661 | 0.0026 | 0.8111 |
| RP11-350J20.5 | 3.0287 | 0.0421 | 0.14878 | CLSTN2       | 5.7215 | 0.0027 | 1.1158 |
| PRDM16        | 3.2025 | 0.0424 | 0.12259 | AP000708.1   | 5.3579 | 0.0028 | 0.1114 |
| TMEM191A      | 3.3151 | 0.0424 | 0.08724 | NRXN3        | 5.2728 | 0.0028 | 0.3186 |
| RP11-525A16.4 | 3.5332 | 0.0426 | 1.12813 | ATG9B        | 3.5894 | 0.0028 | 0.3798 |
| GMNC          | 4.3933 | 0.0434 | 0.68632 | OLFM3        | 6.8703 | 0.0029 | 0.9459 |
| FGF7P8        | 4.3642 | 0.0434 | 0.03762 | TBC1D3D      | 4.8908 | 0.0030 | 0.7413 |
| PYY           | 3.3379 | 0.0434 | 0.05025 | RP11-247A12. | 4.1691 | 0.0030 | 0.3506 |
| RP11-666A20.4 | 4.1992 | 0.0450 | 0.13444 | GSG1L        | 5.6553 | 0.0031 | 0.5406 |
| RP11-360O19.  | 4.2274 | 0.0469 | 0.20909 | C7orf61      | 3.7172 | 0.0031 | 0.6755 |
| HSPA1A        | 4.1625 | 0.0491 | 0.39271 | RP11-620J15. | 5.3183 | 0.0032 | 2.0189 |
| CTD-2334D19.  | 4.3314 | 0.0492 | 0.02606 | TUBB2BP1     | 4.7587 | 0.0033 | 0.5226 |
| RP11-89F3.2   | 3.7575 | 0.0496 | 0.15480 | SPATA22      | 5.1520 | 0.0034 | 0.1093 |
| TRPM6         | 3.3470 | 0.0500 | 0.01057 | KLRK1        | 6.8134 | 0.0034 | 2.0787 |
|               |        |        |         | LRRC3B       | 5.5468 | 0.0036 | 0.8352 |
|               |        |        |         | RP5-1024C24. | 5.9992 | 0.0036 | 0.8969 |
|               |        |        |         | WFDC1        | 4.6954 | 0.0037 | 0.7572 |
|               |        |        |         | PCDHB9       | 3.2032 | 0.0037 | 0.6081 |
|               |        |        |         | SEC14L5      | 4.3765 | 0.0037 | 1.0790 |
|               |        |        |         | BEX2         | 5.0667 | 0.0037 | 0.7579 |
|               |        |        |         | ASB4         | 5.2528 | 0.0037 | 0.6381 |
|               |        |        |         | NECAB2       | 3.6956 | 0.0038 | 0.9083 |
|               |        |        |         | EFTUD1P1     | 3.2348 | 0.0039 | 0.3442 |
|               |        |        |         | LINC00506    | 5.2956 | 0.0039 | 0.1917 |
|               |        |        |         | BMS1P2       | 4.0521 | 0.0039 | 0.4080 |
|               |        |        |         | GFI1B        | 3.7275 | 0.0040 | 0.5945 |
|               |        |        |         | RGMA         | 3.4527 | 0.0041 | 0.0208 |
|               |        |        |         | FSBP         | 3.7881 | 0.0042 | 0.9495 |
|               |        |        |         | ZNF423       | 4.8742 | 0.0043 | 0.3785 |
|               |        |        |         | RP11-281O15. | 5.0481 | 0.0043 | 0.6800 |
|               |        |        |         | LINC00877    | 5.1626 | 0.0044 | 0.2446 |
|               |        |        |         | PNMA3        | 4.2836 | 0.0045 | 1.2794 |
|               |        |        |         | LINC00606    | 5.9152 | 0.0045 | 0.4150 |
|               |        |        |         | DACT3-AS1    | 4.6344 | 0.0046 | 0.8437 |
|               |        |        |         | AFF3         | 4.8507 | 0.0047 | 0.6721 |
|               |        |        |         | HHATL        | 5.3547 | 0.0049 | 0.9503 |
|               |        |        |         | GPR12        | 5.2131 | 0.0050 | 1.4840 |

|               |        |        |        |
|---------------|--------|--------|--------|
| ASCL1         | 6.4222 | 0.0051 | 1.5635 |
| RP11-758P17.  | 3.7142 | 0.0052 | 0.1701 |
| RP11-216B9.9  | 3.2349 | 0.0055 | 0.5805 |
| RP11-136C24.  | 5.2985 | 0.0055 | 0.5999 |
| SPATA42       | 5.0719 | 0.0056 | 0.5594 |
| LTK           | 3.3889 | 0.0057 | 0.6213 |
| GNG3          | 5.0272 | 0.0057 | 0.7093 |
| RP11-620J15.4 | 4.9438 | 0.0058 | 1.7478 |
| ARHGDIG       | 5.3221 | 0.0059 | 0.9620 |
| KIAA1755      | 3.4167 | 0.0060 | 0.4759 |
| LINC01977     | 5.3226 | 0.0061 | 1.0575 |
| RP11-241F15.  | 4.7008 | 0.0062 | 0.9812 |
| ZEB2-AS1      | 4.0995 | 0.0063 | 0.1863 |
| KLRC2         | 6.2284 | 0.0064 | 2.8325 |
| GDF7          | 5.2938 | 0.0065 | 0.9583 |
| CACNA1D       | 4.4575 | 0.0066 | 0.6191 |
| PLXNA2        | 3.7076 | 0.0066 | 0.2782 |
| PODN          | 5.7177 | 0.0066 | 0.6198 |
| PCDHA3        | 5.7077 | 0.0067 | 0.8190 |
| SELENOV       | 5.2568 | 0.0069 | 1.1943 |
| TRIM67        | 4.9740 | 0.0072 | 2.6221 |
| SDK2          | 4.7772 | 0.0074 | 0.0914 |
| OLFM1         | 6.2273 | 0.0074 | 0.9495 |
| LINC01816     | 4.9271 | 0.0075 | 0.8473 |
| CHRNA4        | 5.6709 | 0.0081 | 2.2968 |
| RP11-277P12.  | 4.9712 | 0.0081 | 2.2566 |
| BCL2L15       | 3.0285 | 0.0081 | 0.5070 |
| ACTN2         | 3.0883 | 0.0084 | 0.2396 |
| RP11-472N13.  | 4.4647 | 0.0085 | 0.7597 |
| GPR158-AS1    | 4.8485 | 0.0086 | 0.0642 |
| AC003991.3    | 4.8317 | 0.0088 | 0.4532 |
| RP11-318C24.  | 4.8280 | 0.0091 | 0.5283 |
| AC005220.3    | 5.5520 | 0.0094 | 0.1061 |
| RNF128        | 5.1830 | 0.0095 | 0.0309 |
| GABRB3        | 5.5482 | 0.0098 | 1.3130 |
| SLC26A1       | 4.8443 | 0.0099 | 0.6689 |
| GABRA2        | 4.9564 | 0.0100 | 0.4802 |
| RP11-259K15.  | 5.0183 | 0.0101 | 1.1989 |
| NXPH2         | 5.5025 | 0.0103 | 1.1442 |
| SKINT1L       | 4.5984 | 0.0109 | 0.5295 |
| PCDHGA10      | 3.2617 | 0.0110 | 0.6541 |
| SNAP25        | 3.5742 | 0.0110 | 0.8426 |
| TMEM130       | 4.6349 | 0.0110 | 0.6108 |
| IGSF5         | 4.8598 | 0.0114 | 0.2773 |
| ZNF571-AS1    | 4.9748 | 0.0117 | 0.8521 |
| MYOZ3         | 4.1371 | 0.0122 | 0.3432 |
| RTN1          | 3.7524 | 0.0124 | 0.4498 |
| GDF6          | 5.4197 | 0.0125 | 0.9618 |
| PDIA2         | 4.9002 | 0.0127 | 1.4515 |

|               |        |        |        |
|---------------|--------|--------|--------|
| HCG22         | 5.3763 | 0.0129 | 0.2231 |
| LINC01505     | 3.3301 | 0.0131 | 0.7594 |
| GS1-259H13.2  | 3.1565 | 0.0132 | 0.0925 |
| DNAJA4        | 5.1252 | 0.0135 | 0.0129 |
| RP11-50D16.4  | 4.6512 | 0.0138 | 0.6064 |
| RASL10A       | 4.6459 | 0.0141 | 0.8780 |
| LINC00648     | 4.6452 | 0.0145 | 1.5474 |
| CDH3          | 3.7692 | 0.0146 | 0.6309 |
| GPFR1         | 3.2455 | 0.0147 | 0.1122 |
| AC027612.4    | 5.3158 | 0.0148 | 0.4684 |
| MEG9          | 5.2727 | 0.0157 | 0.0300 |
| CPA2          | 5.2946 | 0.0157 | 0.1324 |
| MYH7          | 4.8622 | 0.0159 | 0.4765 |
| UNC13A        | 3.2187 | 0.0160 | 1.1579 |
| THSD7A        | 3.6526 | 0.0161 | 1.0109 |
| GRM2          | 4.4276 | 0.0164 | 0.9824 |
| TMEM132C      | 5.2805 | 0.0176 | 1.0937 |
| RP11-627G23.  | 4.6094 | 0.0181 | 0.2903 |
| RSU1P2        | 5.2254 | 0.0182 | 0.3793 |
| ATP8A2        | 4.2915 | 0.0185 | 0.5791 |
| RP11-351J23.  | 4.4960 | 0.0196 | 0.5468 |
| LINC01549     | 4.5724 | 0.0202 | 0.4761 |
| SCN2B         | 4.6126 | 0.0207 | 0.2847 |
| MMD2          | 4.7039 | 0.0210 | 1.6718 |
| ZIM2-AS1      | 5.7285 | 0.0216 | 1.0882 |
| KCNAB1        | 4.6342 | 0.0216 | 0.3873 |
| AC006026.13   | 4.4791 | 0.0221 | 0.2633 |
| SLC6A11       | 4.7330 | 0.0222 | 0.0728 |
| NRXN1         | 4.8786 | 0.0224 | 1.0610 |
| GFRA3         | 4.7162 | 0.0225 | 0.6031 |
| SEZ6L         | 5.6002 | 0.0231 | 1.3996 |
| AC013460.1    | 3.9413 | 0.0232 | 1.3381 |
| SAMD14        | 3.2107 | 0.0236 | 0.6566 |
| FAM182A       | 3.6100 | 0.0239 | 1.0859 |
| RP11-266K4.9  | 4.2405 | 0.0241 | 0.4630 |
| SEMA6A-AS2    | 3.3040 | 0.0241 | 0.1935 |
| IGLON5        | 5.5749 | 0.0243 | 1.3758 |
| RP1-274L7.4   | 3.8309 | 0.0245 | 0.8858 |
| C5orf67       | 5.0275 | 0.0246 | 0.1530 |
| AC083867.4    | 4.6536 | 0.0253 | 1.6979 |
| TPTE2P5       | 3.0629 | 0.0259 | 0.2563 |
| GRM7          | 3.4682 | 0.0263 | 1.0132 |
| RP11-103J8.1  | 4.6266 | 0.0270 | 0.0646 |
| C16orf45      | 3.1398 | 0.0279 | 0.4463 |
| LINC01679     | 4.4973 | 0.0281 | 0.9819 |
| RP11-615I2.2  | 4.3658 | 0.0286 | 1.2044 |
| GADD45G       | 4.6236 | 0.0287 | 1.8836 |
| RP11-728K20.  | 4.9300 | 0.0289 | 0.1546 |
| CTD-2010I16.1 | 3.2384 | 0.0289 | 0.4354 |



|               |        |        |        |
|---------------|--------|--------|--------|
| LINC01207     | 4.7089 | 0.0295 | 1.5553 |
| RAPGEF4-AS1   | 4.9379 | 0.0295 | 0.4769 |
| SEZ6          | 5.3375 | 0.0296 | 1.4494 |
| TMEM88        | 3.9319 | 0.0302 | 0.0721 |
| AC007255.8    | 3.5024 | 0.0307 | 0.7794 |
| PRR26         | 4.3607 | 0.0317 | 0.8069 |
| RP11-536C5.2  | 4.3234 | 0.0317 | 0.8584 |
| SPON1         | 4.3840 | 0.0317 | 0.2559 |
| RPH3A         | 5.3879 | 0.0324 | 0.2942 |
| KCNQ4         | 4.0489 | 0.0326 | 0.2564 |
| NAPSA         | 3.8871 | 0.0331 | 0.0376 |
| HOXD13        | 3.1541 | 0.0339 | 0.2672 |
| ZNF663P       | 4.3205 | 0.0340 | 0.6102 |
| RP11-15I11.3  | 3.5674 | 0.0342 | 0.8645 |
| CTD-2339F6.1  | 5.0117 | 0.0344 | 1.9449 |
| RP11-182J1.14 | 3.3037 | 0.0347 | 1.2716 |
| MIR181A1HG    | 3.3451 | 0.0348 | 1.0008 |
| ADCY2         | 3.9081 | 0.0351 | 0.6100 |
| RP11-138I1.3  | 4.4079 | 0.0354 | 0.2193 |
| RP11-624M8.1  | 3.8383 | 0.0357 | 0.1144 |
| RP11-109E12.  | 4.3468 | 0.0365 | 0.5169 |
| RIPPLY3       | 4.2795 | 0.0366 | 0.5124 |
| MYBPHL        | 3.9107 | 0.0372 | 0.3339 |
| LINC00598     | 3.2572 | 0.0374 | 0.0892 |
| GRID2IP       | 3.0258 | 0.0377 | 0.7852 |
| ACSL6         | 4.3323 | 0.0395 | 0.6218 |
| PLCL1         | 3.0874 | 0.0396 | 0.7133 |
| SATB1-AS1     | 4.2655 | 0.0402 | 1.0831 |
| CTD-2619J13.  | 3.8705 | 0.0407 | 0.1729 |
| C22orf24      | 3.3622 | 0.0408 | 0.4299 |
| RP13-644M16   | 4.3542 | 0.0415 | 0.2604 |
| FAM19A5       | 4.0654 | 0.0419 | 0.8651 |
| SLC35D3       | 4.4636 | 0.0421 | 0.7549 |
| IGSF9         | 3.8339 | 0.0427 | 1.3024 |
| HYAL1         | 3.0169 | 0.0433 | 0.1436 |
| RP11-369K16.  | 4.3785 | 0.0439 | 0.2091 |
| LINC00519     | 4.1742 | 0.0441 | 0.0473 |
| NRXN2         | 3.2652 | 0.0445 | 1.1900 |
| ROBO2         | 3.1047 | 0.0451 | 0.7539 |
| OTOGL         | 3.2026 | 0.0457 | 0.9311 |
| CTC-344H19.4  | 3.5342 | 0.0460 | 0.2764 |
| RNF219-AS1    | 4.2873 | 0.0461 | 1.2373 |
| IL1RAPL2      | 4.6414 | 0.0462 | 0.7757 |
| CCND2-AS1     | 3.9478 | 0.0470 | 0.4098 |
| FAM189A1      | 3.0610 | 0.0479 | 0.1377 |
| RGS11         | 4.4423 | 0.0490 | 0.1674 |
| SHISA9        | 4.2851 | 0.0499 | 0.6837 |

**Supplementary Table 7:** Alternatively spliced and differentially expressed genes between mesenchymal (MES) and proneural (PN) GSCs.

**ASS (alternative splice site 5' or 3'):** genomic coordinates of long and short exons (columns g.coord

**MXE (mutually exclusive exon):** genomic coordinates of first and second exons (columns g.coord\_1

**RI (retained intron):** genomic coordinates of retained intron (column g.coord\_1)

**ES (exon skipping):** genomic coordinates of skipped exon (column g.coord\_1)

| gene        | Differential expression |                | Differential splicing |        |                           |                          |                      |                |
|-------------|-------------------------|----------------|-----------------------|--------|---------------------------|--------------------------|----------------------|----------------|
|             | log2FoldChange          | FDR            | event.type            | strand | g.coord_1                 | g.coord_2                | inc.level.difference | FDR            |
| ABCB6       | -3.307001766            | 1.03E-05       | RI                    | -      | chr2:219210380-219210823  | NA                       | 0.538                | 0.001910688849 |
| ABCD4       | -1.49262165             | 0.000205653789 | ES                    | -      | chr14:74295147-74295198   | NA                       | -0.467               | 0.000418686846 |
|             |                         |                | ES                    | -      | chr14:74297638-74298069   | NA                       | 0.168                | 0.000507655253 |
|             |                         |                | ES                    | -      | chr14:74299547-74299675   | NA                       | 0.145                | 0.001061603759 |
|             |                         |                | ES                    | -      | chr14:74300149-74300268   | NA                       | 0.162                | 0.004938847597 |
|             |                         |                | ES                    | -      | chr14:74288206-74288259   | NA                       | -0.172               | 0.01087266728  |
|             |                         |                | ES                    | -      | chr14:74299547-74299675   | NA                       | -0.244               | 0.01184031581  |
|             |                         |                | ES                    | -      | chr14:74300149-74300268   | NA                       | -0.157               | 0.04822228261  |
| ABHD11      | -2.239355234            | 0.000919304976 | ES                    | -      | chr7:73737220-73737360    | NA                       | 0.193                | 0.007980648665 |
|             |                         |                | RI                    | -      | chr7:73737220-73737735    | NA                       | -0.285               | 0.0236309712   |
| ABHD14B     | 1.769971385             | 5.59E-06       | ES                    | -      | chr3:51971811-51971892    | NA                       | -0.435               | 4.64E-06       |
| ABHD3       | -1.355213982            | 0.000187405328 | A5SS                  | -      | chr18:21663677-21664230   | chr18:21664117-21664230  | 0.388                | 4.71E-07       |
| ABL2        | 1.946649981             | 3.09E-13       | ES                    | -      | chr1:179133311-179133374  | NA                       | -0.173               | 0.001458185891 |
| AC005154.6  | -2.818045991            | 1.77E-11       | MXE                   | -      | chr7:30576563-30576710    | chr7:30584710-30584808   | 0.278                | 0.02127345004  |
| AC007040.11 | 3.466808863             | 0.002252917358 | ES                    | -      | chr2:70991829-70991983    | NA                       | -0.101               | 0.01868342172  |
| AC007566.10 | -1.014212726            | 0.04603914804  | ES                    | +      | chr7:92462957-92463026    | NA                       | 0.228                | 3.06E-06       |
| AC108488.4  | -1.73751869             | 0.01934800273  | ES                    | -      | chr2:3533107-3533190      | NA                       | 0.211                | 0.02986419007  |
| ACAD11      | 1.659899111             | 0.005686184971 | RI                    | -      | chr3:132578795-132579558  | NA                       | -0.11                | 0.00157883001  |
| ACAT1       | 1.901181734             | 0.000194905780 | ES                    | +      | chr11:108129102-108129201 | NA                       | 0.17                 | 0.04997449951  |
| ACSS1       | -1.001498873            | 0.0250473989   | ES                    | -      | chr20:25015137-25015230   | NA                       | -0.146               | 0.02664983959  |
| ACTN1       | 1.184788077             | 6.70E-05       | ES                    | -      | chr14:68878988-68879069   | NA                       | 0.131                | 2.38E-08       |
| ADAM22      | -1.886876099            | 0.0016332856   | ES                    | +      | chr7:88186614-88186701    | NA                       | -0.22                | 4.44E-07       |
| ADAMTS6     | 2.436437792             | 0.009602273143 | ES                    | -      | chr5:65470777-65471142    | NA                       | -0.295               | 6.69E-05       |
| ADAP2       | 3.360071655             | 1.37E-09       | MXE                   | +      | chr17:30926826-30926918   | chr17:30931888-30931968  | 0.411                | 3.40E-05       |
| ADAT1       | -1.502652197            | 6.01E-05       | ES                    | -      | chr16:75618585-75618698   | NA                       | 0.123                | 0.009096233477 |
| ADCY6       | -1.377884627            | 0.01864612585  | ES                    | -      | chr12:48773939-48774098   | NA                       | -0.182               | 0.001421550924 |
|             |                         |                | A3SS                  | -      | chr12:48773468-48774098   | chr12:48773468-48773647  | -0.286               | 0.002706536394 |
| ADD1        | -1.324669409            | 0.003595515826 | RI                    | +      | chr4:2908514-2909431      | NA                       | 0.284                | 0.01160406502  |
| ADGRG1      | -4.440798232            | 0.000895656285 | ES                    | +      | chr16:57641590-57641708   | NA                       | 0.318                | 0.005039214886 |
|             |                         |                | ES                    | +      | chr16:57641586-57641708   | NA                       | 0.443                | 0.009505385205 |
| ADGRL1      | -1.685372987            | 0.000393716323 | ES                    | -      | chr19:14167015-14167030   | NA                       | -0.204               | 0.002071693895 |
| ADGRL2      | -4.221479784            | 2.51E-06       | ES                    | +      | chr1:81986900-81987029    | NA                       | 0.227                | 3.49E-10       |
|             |                         |                | ES                    | +      | chr1:81987288-81987341    | NA                       | -0.256               | 1.66E-05       |
|             |                         |                | ES                    | +      | chr1:81952986-81953025    | NA                       | 0.368                | 0.004113255113 |
|             |                         |                | ES                    | +      | chr1:81987259-81987341    | NA                       | -0.144               | 0.0439700115   |
| ADGRL3      | -2.625659858            | 0.000158145126 | ES                    | +      | chr4:61730621-61730636    | NA                       | -0.224               | 0.001796423469 |
|             |                         |                | MXE                   | +      | chr4:61676825-61676935    | chr4:61732753-61733554   | -0.138               | 0.008473719203 |
| AFDN        | -1.359167603            | 9.79E-06       | ES                    | +      | chr6:167913402-167913423  | NA                       | -0.579               | 4.69E-10       |
| AGAP1       | -1.972480215            | 0.004616489308 | ES                    | +      | chr2:235750353-235750488  | NA                       | -0.18                | 3.67E-06       |
| AGAP4       | -1.336505827            | 0.000590755917 | MXE                   | -      | chr10:45841652-45841687   | chr10:45844325-45844394  | 0.785                | 1.11E-09       |
|             |                         |                | ES                    | -      | chr10:45834015-45834116   | NA                       | -0.8                 | 0.000114900623 |
|             |                         |                | MXE                   | -      | chr10:45834015-45834116   | chr10:45841652-45841687  | 0.708                | 0.000194493061 |
| AGPAT4      | -2.101653927            | 1.40E-14       | ES                    | -      | chr6:161165576-161165713  | NA                       | 0.184                | 1.73E-06       |
|             |                         |                | MXE                   | -      | chr6:161154148-161154310  | chr6:161165576-161165713 | 0.108                | 0.000617106267 |
|             |                         |                | ES                    | -      | chr6:161165576-161165713  | NA                       | 0.441                | 0.001023745599 |
| ALG9        | -1.252130947            | 0.003147345933 | A3SS                  | -      | chr11:111838248-111838399 | chr11:111838248-11183837 | 0.2                  | 0.009557061151 |
| ALKBH8      | 1.114900193             | 0.01146910437  | ES                    | -      | chr11:107549752-107549823 | NA                       | -0.271               | 0.000185782203 |
| ALPK1       | 2.727274259             | 0.001304598993 | ES                    | +      | chr4:112315800-112315852  | NA                       | -0.153               | 0.004367829994 |
| AMMECR1L    | -1.161534664            | 0.000509267750 | ES                    | -      | chr2:127871248-127871359  | NA                       | 0.193                | 0.02137621621  |
| AMPD2       | 2.127534674             | 0.001378832489 | ES                    | +      | chr1:109622184-109622353  | NA                       | -0.554               | 0.000293523243 |
| ANAPC10     | 1.022415053             | 0.01885973881  | ES                    | -      | chr4:145097687-145097760  | NA                       | 0.592                | 0.006742072944 |

|              |              |                |      |   |                           |                          |        |                |
|--------------|--------------|----------------|------|---|---------------------------|--------------------------|--------|----------------|
| ANAPC11      | 1.453076968  | 0.012934033    | ES   | + | chr17:81899241-81899542   | NA                       | 0.106  | 0              |
| ANAPC5       | 1.354446441  | 0.007216952797 | RI   | - | chr12:121345838-121347005 | NA                       | -0.144 | 0              |
|              |              |                | RI   | - | chr12:121327095-121328497 | NA                       | -0.144 | 0              |
|              |              |                | A3SS | - | chr12:121328315-121328497 | chr12:121328315-12132845 | 0.198  | 5.53E-11       |
| ANK3         | -5.405543463 | 3.28E-36       | ES   | - | chr10:60200128-60200263   | NA                       | 0.135  | 0.002225080387 |
|              |              |                | A3SS | - | chr10:60059339-60060006   | chr10:60059339-60059430  | 0.164  | 0.003617031386 |
|              |              |                | ES   | - | chr10:60059697-60060033   | NA                       | 0.119  | 0.00550678331  |
|              |              |                | ES   | - | chr10:60145967-60146021   | NA                       | 0.18   | 0.02371629734  |
| ANKHD1-EIF4E | -1.934119146 | 0.000596927736 | ES   | + | chr5:140496519-140497278  | NA                       | 0.155  | 2.70E-05       |
|              |              |                | A3SS | + | chr5:140537337-140537589  | chr5:140537388-140537589 | 0.176  | 0.000113258999 |
| ANKRD10      | -2.292872501 | 2.15E-11       | A3SS | - | chr13:110900529-110900694 | chr13:110900529-11090066 | 0.144  | 0.000443820326 |
|              |              |                | ES   | - | chr13:110894284-110894393 | NA                       | -0.459 | 0.01041046655  |
| ANKRD20A11F  | -2.370088227 | 0.000991961178 | MXE  | - | chr21:13915186-13915409   | chr21:13916746-13916958  | 0.288  | 0.002470228289 |
| ANKRD27      | 3.621652629  | 2.55E-25       | MXE  | - | chr19:32607634-32607832   | chr19:32615657-32615780  | -0.209 | 0.004476786939 |
|              |              |                | MXE  | - | chr19:32605834-32605954   | chr19:32607634-32607832  | 0.209  | 0.01128144421  |
| ANXA4        | 1.080039129  | 0.005402096904 | A5SS | + | chr2:69806384-69806498    | chr2:69806384-69806432   | -0.17  | 2.79E-05       |
| AP1AR        | 1.737939287  | 0.000674774728 | ES   | + | chr4:112262987-112263086  | NA                       | 0.121  | 0.002927110877 |
| AP1S2        | -2.574886233 | 1.17E-05       | ES   | - | chrX:15833443-15833524    | NA                       | 0.284  | 0.03860979484  |
| APAF1        | -1.567964156 | 3.34E-05       | ES   | + | chr12:98703370-98703499   | NA                       | -0.278 | 0.001135475143 |
| APBB2        | -2.016174325 | 4.24E-08       | ES   | - | chr4:40935076-40935139    | NA                       | 0.711  | 0              |
| APOM         | -2.442445538 | 3.57E-05       | ES   | + | chr6:31656471-31656626    | NA                       | 0.162  | 0.000963896981 |
| APRT         | 1.454839965  | 0.005964505308 | A3SS | - | chr16:88809468-88809840   | chr16:88809468-88809706  | 0.167  | 1.57E-06       |
| AREL1        | -1.10195675  | 0.000261842113 | ES   | - | chr14:74701668-74701774   | NA                       | 0.502  | 0.001735749298 |
| ARHGAP21     | -1.782212896 | 8.36E-08       | ES   | - | chr10:24622732-24622762   | NA                       | -0.367 | 1.48E-07       |
| ARHGEF10     | 1.376884529  | 0.002520603555 | ES   | + | chr8:1926376-1926463      | NA                       | -0.138 | 1.97E-05       |
|              |              |                | ES   | + | chr8:1880047-1880164      | NA                       | -0.324 | 0.000880675005 |
| ARHGEF40     | -1.48529973  | 0.02048618293  | MXE  | + | chr14:21087000-21087105   | chr14:21087319-21087463  | -0.249 | 6.58E-05       |
|              |              |                | RI   | + | chr14:21087000-21087463   | NA                       | -0.404 | 0.000594384868 |
|              |              |                | ES   | + | chr14:21075644-21075765   | NA                       | -0.169 | 0.000780430881 |
|              |              |                | ES   | + | chr14:21075622-21075765   | NA                       | -0.248 | 0.000884318560 |
|              |              |                | A5SS | + | chr14:21075331-21075765   | chr14:21075331-21075499  | -0.301 | 0.001128835062 |
| ARHGEF7      | -3.169599061 | 2.19E-26       | MXE  | + | chr13:111205288-111205373 | chr13:111209871-11121000 | 0.312  | 7.62E-10       |
|              |              |                | ES   | + | chr13:111288353-111288443 | NA                       | -0.162 | 8.37E-06       |
|              |              |                | MXE  | + | chr13:111205288-111205373 | chr13:111209871-11121000 | 0.219  | 1.07E-05       |
|              |              |                | ES   | + | chr13:111209871-111210002 | NA                       | -0.238 | 1.63E-05       |
|              |              |                | ES   | + | chr13:111209871-111210002 | NA                       | -0.205 | 0.007873662431 |
|              |              |                | MXE  | + | chr13:111153904-111153991 | chr13:111209871-11121000 | 0.14   | 0.008703836928 |
| ARL4A        | -1.808872899 | 0.007965219414 | ES   | + | chr7:12687634-12687728    | NA                       | -0.602 | 0              |
|              |              |                | ES   | + | chr7:12687634-12687728    | NA                       | -0.499 | 7.00E-10       |
| ARMC4        | 5.531166913  | 2.15E-12       | ES   | - | chr10:27968922-27969018   | NA                       | -0.369 | 0.01357652802  |
| ARMCX5-GPR   | -1.407923176 | 0.00109723521  | ES   | + | chrX:102601879-102601977  | NA                       | 0.266  | 1.98E-07       |
|              |              |                | ES   | + | chrX:102601463-102601509  | NA                       | 0.358  | 0.000666033342 |
|              |              |                | MXE  | + | chrX:102601463-102601509  | chrX:102601879-102601977 | -0.371 | 0.001699714909 |
|              |              |                | MXE  | + | chrX:102601879-102601977  | chrX:102639399-102639533 | 0.154  | 0.02227107106  |
| ARNTL2       | 3.112129098  | 1.27E-15       | ES   | + | chr12:27370128-27370230   | NA                       | -0.173 | 0.000297930725 |
|              |              |                | MXE  | + | chr12:27370128-27370230   | chr12:27376345-27376387  | -0.224 | 0.002977500621 |
|              |              |                | ES   | + | chr12:27376345-27376387   | NA                       | 0.204  | 0.005462739449 |
|              |              |                | ES   | + | chr12:27370128-27370230   | NA                       | -0.309 | 0.02166060778  |
| ARPC4        | -1.03693576  | 0.03217150924  | MXE  | + | chr3:9797658-9797777      | chr3:9800184-9800296     | 0.15   | 9.96E-07       |
| ARPP19       | -1.185558463 | 0.002416539789 | ES   | - | chr15:52564189-52564246   | NA                       | -0.288 | 3.04E-05       |
|              |              |                | ES   | - | chr15:52568847-52568902   | NA                       | -0.12  | 0.000174792228 |
|              |              |                | ES   | - | chr15:52568847-52568900   | NA                       | -0.143 | 0.000749563285 |
| ARRDC1       | 2.227428125  | 0.000101178293 | RI   | + | chr9:137612895-137613510  | NA                       | -0.299 | 1.29E-06       |
| ASAP2        | 1.226637135  | 3.03E-05       | ES   | + | chr2:9391061-9391196      | NA                       | -0.539 | 6.77E-06       |
| ASPH         | 2.246488196  | 3.23E-06       | ES   | - | chr8:61646749-61646878    | NA                       | 0.112  | 0              |
|              |              |                | MXE  | - | chr8:61651049-61651124    | chr8:61653567-61653660   | 0.132  | 0              |
|              |              |                | MXE  | - | chr8:61618977-61619019    | chr8:61633682-61633727   | 0.21   | 2.91E-07       |
|              |              |                | MXE  | - | chr8:61583943-61584029    | chr8:61633682-61633727   | 0.178  | 1.90E-06       |
| ASPSCR1      | 1.548665312  | 0.007131859271 | RI   | + | chr17:82016799-82017113   | NA                       | 0.125  | 0.002774257415 |
|              |              |                | MXE  | + | chr17:82016475-82016527   | chr17:82016799-82016869  | -0.327 | 0.03891190073  |

|           |              |                |      |   |                           |                          |        |                |
|-----------|--------------|----------------|------|---|---------------------------|--------------------------|--------|----------------|
| ATAD2     | 1.758292203  | 2.57E-06       | ES   | - | chr8:123400742-123401175  | NA                       | 0.254  | 0.02776636468  |
| ATAD5     | 1.107936454  | 0.003567230275 | ES   | + | chr17:30879422-30879487   | NA                       | -0.194 | 1.38E-05       |
| ATAT1     | -1.772771174 | 3.82E-08       | RI   | + | chr6:30642767-30644679    | NA                       | 0.271  | 2.34E-08       |
|           |              |                | MXE  | + | chr6:30642767-30643011    | chr6:30645894-30645974   | 0.4    | 0.000570966894 |
|           |              |                | ES   | + | chr6:30642767-30643011    | NA                       | 0.236  | 0.01637108017  |
|           |              |                | ES   | + | chr6:30640534-30640603    | NA                       | -0.265 | 0.02320561358  |
| ATP11A    | -1.141711817 | 0.04120840326  | A3SS | + | chr13:112881812-112887168 | chr13:112881875-11288716 | 0.39   | 0.001121865795 |
|           |              |                | ES   | + | chr13:112878216-112878303 | NA                       | -0.461 | 0.002993621228 |
| ATP2B1    | -2.479504465 | 2.50E-07       | MXE  | - | chr12:89627677-89627716   | chr12:89630504-89630645  | 0.152  | 0.007378547302 |
| ATP6V1B1  | -1.639697141 | 0.0235821543   | ES   | + | chr2:70963161-70963261    | NA                       | 0.253  | 0.000812214171 |
|           |              |                | ES   | + | chr2:70963161-70963312    | NA                       | 0.147  | 0.001312492684 |
| ATP9B     | -2.419285766 | 5.32E-10       | ES   | + | chr18:79375393-79375426   | NA                       | -0.2   | 0.000136276856 |
|           |              |                | MXE  | + | chr18:79154503-79154555   | chr18:79176812-79176907  | -0.167 | 0.001097782761 |
| AURKB     | 2.363529693  | 5.90E-09       | ES   | - | chr17:8210176-8210249     | NA                       | -0.232 | 1.97E-11       |
|           |              |                | ES   | - | chr17:8210176-8210225     | NA                       | -0.33  | 1.60E-09       |
|           |              |                | A3SS | - | chr17:8207737-8207901     | chr17:8207737-8207840    | -0.343 | 0.007397341977 |
| B3GNTL1   | 2.81932632   | 7.08E-11       | MXE  | - | chr17:82965650-82965746   | chr17:83005114-83005210  | -0.181 | 0.000398856445 |
| BAIAP2    | 2.052515418  | 4.82E-05       | ES   | + | chr17:81036862-81036961   | NA                       | -0.133 | 0.03537587177  |
| BAX       | -1.699565106 | 0.00169985767  | RI   | + | chr19:48960809-48961798   | NA                       | 0.233  | 0              |
|           |              |                | ES   | + | chr19:48955547-48955599   | NA                       | 0.209  | 0.02365356143  |
| BCAS4     | 1.852960821  | 0.000187599744 | ES   | + | chr20:50840536-50840930   | NA                       | -0.605 | 0              |
| BCHE      | -6.773798862 | 2.14E-21       | ES   | - | chr3:165829516-165831041  | NA                       | -0.372 | 1.84E-13       |
|           |              |                | ES   | - | chr3:165777716-165777795  | NA                       | 0.11   | 1.52E-06       |
| BCL2L11   | -2.97836296  | 2.82E-09       | ES   | + | chr2:111124049-111124139  | NA                       | 0.168  | 0.000244558941 |
|           |              |                | A5SS | + | chr2:111123745-111124139  | chr2:111123745-111123869 | 0.154  | 0.000276218368 |
|           |              |                | ES   | + | chr2:111123732-111123869  | NA                       | 0.111  | 0.01404100243  |
| BCL2L12   | 1.036374197  | 0.03262397763  | ES   | + | chr19:49667018-49667161   | NA                       | -0.105 | 0.01389440019  |
|           |              |                | ES   | + | chr19:49667021-49667161   | NA                       | -0.145 | 0.02383511682  |
| BDH2      | -2.602569511 | 2.91E-08       | A5SS | - | chr4:103085698-103086540  | chr4:103086479-103086540 | -0.241 | 0              |
|           |              |                | RI   | - | chr4:103085348-103086540  | NA                       | -0.253 | 0              |
|           |              |                | RI   | - | chr4:103085348-103086540  | NA                       | 0.223  | 8.25E-05       |
|           |              |                | A5SS | - | chr4:103085348-103086540  | chr4:103086479-103086540 | -0.231 | 0.04209827853  |
| BDNF-AS   | -2.440499658 | 0.000270164116 | ES   | + | chr11:27658240-27658462   | NA                       | 0.274  | 1.00E-06       |
|           |              |                | ES   | + | chr11:27675576-27676140   | NA                       | 0.343  | 0.001406429329 |
|           |              |                | ES   | + | chr11:27675296-27676140   | NA                       | 0.368  | 0.00177508727  |
| BEND6     | 2.07869001   | 0.000488670948 | ES   | + | chr6:57018420-57018557    | NA                       | -0.22  | 0.02050644615  |
| BMP1      | -1.898669967 | 0.01614389603  | A3SS | + | chr8:22201117-22201928    | chr8:22201802-22201928   | 0.321  | 0.000398575518 |
|           |              |                | A3SS | + | chr8:22176923-22177139    | chr8:22176960-22177139   | 0.119  | 0.01003596905  |
| BPHL      | -1.510703854 | 1.33E-05       | ES   | + | chr6:3119284-3119512      | NA                       | 0.475  | 1.12E-05       |
|           |              |                | A3SS | + | chr6:3138040-3140509      | chr6:3140385-3140509     | 0.145  | 0.004748089327 |
|           |              |                | RI   | + | chr6:3138040-3140509      | NA                       | -0.198 | 0.01313973159  |
| BTBD3     | -1.310719678 | 0.00191197591  | RI   | + | chr20:11917864-11918601   | NA                       | -0.352 | 0.000314242349 |
| C11orf49  | -1.685126938 | 0.005878006534 | ES   | + | chr11:47157022-47157218   | NA                       | -0.276 | 1.06E-10       |
|           |              |                | RI   | + | chr11:47161126-47162247   | NA                       | 0.261  | 0.000656008530 |
| C11orf65  | 1.684546621  | 0.004043590229 | ES   | - | chr11:108431745-108431838 | NA                       | 0.536  | 0.001578796476 |
|           |              |                | MXE  | - | chr11:108405428-108405559 | chr11:108431745-10843183 | 0.19   | 0.01613726558  |
| C14orf159 | -1.018135535 | 0.0038468482   | A5SS | + | chr14:91215404-91215793   | chr14:91215404-91215556  | 0.236  | 0.03523702781  |
| C19orf12  | 1.45752136   | 4.01E-05       | ES   | - | chr19:29708253-29708423   | NA                       | -0.347 | 0.000170947032 |
| C1orf112  | 1.271165254  | 0.009836671994 | A3SS | + | chr1:169804074-169804240  | chr1:169804111-169804240 | 0.17   | 0.003340729773 |
| C1QTNF1   | -2.224858531 | 0.006969056909 | ES   | + | chr17:79043954-79044123   | NA                       | 0.132  | 0.003512996048 |
| C1RL      | 1.429504006  | 0.02653790596  | ES   | - | chr12:7108250-7108479     | NA                       | 0.435  | 2.43E-05       |
| C20orf194 | -1.095541521 | 0.02358174193  | ES   | - | chr20:3343675-3343731     | NA                       | -0.169 | 0.0087482388   |
| C21orf58  | -1.187242538 | 0.009693058467 | RI   | - | chr21:46301129-46302154   | NA                       | 0.265  | 3.09E-06       |
|           |              |                | A3SS | - | chr21:46314715-46315049   | chr21:46314715-46314880  | 0.528  | 0.01015531981  |
| C5orf22   | -1.025136578 | 0.002193718997 | ES   | + | chr5:31548489-31548687    | NA                       | 0.15   | 9.78E-06       |
| C6orf52   | -3.754987247 | 8.14E-07       | ES   | - | chr6:10686965-10687056    | NA                       | 0.117  | 0.0084424949   |
|           |              |                | ES   | - | chr6:10672546-10672636    | NA                       | 0.505  | 0.01885208174  |
|           |              |                | MXE  | - | chr6:10683186-10683232    | chr6:10686965-10687164   | 0.145  | 0.02470719013  |
|           |              |                | MXE  | - | chr6:10683186-10683232    | chr6:10686965-10687164   | 0.123  | 0.03336528488  |
| C9orf85   | -1.363159949 | 0.001757229442 | ES   | + | chr9:71971504-71971618    | NA                       | 0.131  | 0.004011400497 |

|          |              |                |      |   |                           |                          |        |                |
|----------|--------------|----------------|------|---|---------------------------|--------------------------|--------|----------------|
| CADM2    | -5.915072343 | 1.94E-14       | ES   | + | chr3:85979163-85979283    | NA                       | 0.535  | 5.93E-06       |
| CAMK1    | -9.994859989 | 4.23E-11       | ES   | - | chr3:9765758-9765890      | NA                       | 0.122  | 0.001499769913 |
| CAMK2D   | -1.860134917 | 0.03850898767  | A3SS | - | chr4:113509637-113509675  | chr4:113509637-113509672 | 0.216  | 0.004100974342 |
| CAMTA2   | 1.011549198  | 0.03148317724  | ES   | - | chr17:4982088-4982160     | NA                       | -0.239 | 0.000390645863 |
|          |              |                | ES   | - | chr17:4982088-4982227     | NA                       | -0.274 | 0.002049001138 |
|          |              |                | ES   | - | chr17:4982088-4982175     | NA                       | -0.265 | 0.003568838564 |
| CARF     | -1.718585399 | 0.002492204581 | ES   | + | chr2:202974333-202974496  | NA                       | 0.101  | 0.003230019984 |
|          |              |                | MXE  | + | chr2:202924356-202924415  | chr2:202941859-202941980 | -0.149 | 0.004239967383 |
| CASK     | -1.218153687 | 0.000150500121 | ES   | - | chrX:41555599-41555635    | NA                       | -0.278 | 1.34E-11       |
|          |              |                | ES   | - | chrX:41557031-41557100    | NA                       | -0.608 | 4.65E-08       |
|          |              |                | MXE  | - | chrX:41555599-41555635    | chrX:41557031-41557100   | 0.134  | 0.001407486282 |
| CASP4    | 5.47407291   | 5.91E-26       | ES   | - | chr11:104951895-104952063 | NA                       | -0.144 | 0.005857179572 |
| CASP8    | 2.371285742  | 0.02496524068  | A3SS | + | chr2:201266460-201266791  | chr2:201266486-201266791 | -0.127 | 0.002459197716 |
| CAST     | 1.654880843  | 0.000288261170 | ES   | + | chr5:96726793-96726859    | NA                       | -0.698 | 0              |
|          |              |                | ES   | + | chr5:96726753-96726859    | NA                       | -0.557 | 0              |
|          |              |                | MXE  | + | chr5:96727488-96727530    | chr5:96729152-96729209   | 0.368  | 6.23E-14       |
|          |              |                | ES   | + | chr5:96740744-96740783    | NA                       | 0.662  | 2.11E-09       |
|          |              |                | ES   | + | chr5:96729152-96729209    | NA                       | -0.178 | 4.62E-07       |
|          |              |                | ES   | + | chr5:96726793-96726859    | NA                       | -0.543 | 0.000103588851 |
|          |              |                | MXE  | + | chr5:96722638-96722698    | chr5:96729152-96729209   | 0.177  | 0.00121263946  |
| CC2D2A   | -1.390230277 | 0.001385648879 | ES   | + | chr4:15479218-15479328    | NA                       | 0.369  | 0.01564723304  |
|          |              |                | ES   | + | chr4:15479222-15479328    | NA                       | 0.366  | 0.01617330057  |
| CCDC125  | 2.030840177  | 0.002684419434 | ES   | - | chr5:69294792-69294900    | NA                       | -0.188 | 0.004507877005 |
| CCDC159  | -1.294502763 | 0.03393469197  | RI   | + | chr19:11354579-11354943   | NA                       | 0.208  | 0.01046368681  |
| CCDC7    | 2.031794083  | 2.35E-06       | ES   | + | chr10:32567669-32567891   | NA                       | 0.407  | 0.00357102587  |
|          |              |                | MXE  | + | chr10:32463016-32463049   | chr10:32471063-32471230  | -0.421 | 0.0054461904   |
|          |              |                | ES   | + | chr10:32463016-32463049   | NA                       | -0.147 | 0.01351304657  |
|          |              |                | ES   | + | chr10:32471063-32471230   | NA                       | 0.41   | 0.03915855325  |
| CCNE1    | 1.359604972  | 0.03822066458  | ES   | + | chr19:29821995-29822130   | NA                       | -0.164 | 1.69E-05       |
|          |              |                | ES   | + | chr19:29812531-29812578   | NA                       | -0.23  | 0.000898392038 |
| CCNT2    | -1.499508598 | 4.38E-05       | ES   | + | chr2:134945786-134945982  | NA                       | -0.132 | 0.02298175873  |
| CD27-AS1 | -1.901100354 | 0.000615687138 | MXE  | - | chr12:6448639-6448737     | chr12:6450340-6450980    | -0.223 | 0.000313158994 |
|          |              |                | ES   | - | chr12:6443545-6443717     | NA                       | 0.321  | 0.000758051464 |
|          |              |                | ES   | - | chr12:6450340-6450980     | NA                       | -0.27  | 0.01669192307  |
|          |              |                | ES   | - | chr12:6450869-6450980     | NA                       | -0.313 | 0.01675843214  |
|          |              |                | ES   | - | chr12:6450892-6450980     | NA                       | -0.337 | 0.02475961249  |
|          |              |                | ES   | - | chr12:6450473-6450708     | NA                       | 0.232  | 0.0496313164   |
| CD274    | 3.414469829  | 2.86E-09       | RI   | + | chr9:5462833-5463121      | NA                       | -0.167 | 0.000447323618 |
| CDC25C   | 1.700115583  | 7.59E-07       | ES   | - | chr5:138329552-138329647  | NA                       | 0.277  | 4.21E-10       |
|          |              |                | MXE  | - | chr5:138325814-138325904  | chr5:138328483-138328529 | -0.357 | 4.51E-08       |
|          |              |                | ES   | - | chr5:138325814-138325904  | NA                       | 0.312  | 1.94E-06       |
|          |              |                | ES   | - | chr5:138326020-138326054  | NA                       | 0.343  | 8.74E-06       |
|          |              |                | ES   | - | chr5:138289479-138289563  | NA                       | 0.118  | 0.01782449163  |
| CDC42SE1 | -1.423495394 | 2.34E-08       | ES   | - | chr1:151056650-151056786  | NA                       | -0.108 | 8.21E-09       |
| CDK4     | -1.080127317 | 0.02382768186  | ES   | - | chr12:57750441-57750563   | NA                       | 0.44   | 0.008685505951 |
| CDK5RAP2 | -1.249065616 | 1.84E-05       | ES   | - | chr9:120460571-120460667  | NA                       | -0.271 | 3.89E-05       |
|          |              |                | ES   | - | chr9:120460571-120460747  | NA                       | -0.404 | 7.74E-05       |
| CDK7     | 1.328809493  | 9.44E-05       | ES   | + | chr5:69254601-69254669    | NA                       | 0.114  | 0.01973663004  |
|          |              |                | ES   | + | chr5:69254601-69254669    | NA                       | 0.131  | 0.02599262688  |
| CDKL1    | 1.247930004  | 0.002650618585 | ES   | - | chr14:50332261-50332432   | NA                       | 0.34   | 2.97E-05       |
| CENPA    | 1.254057718  | 0.000441941453 | ES   | + | chr2:26792755-26792833    | NA                       | -0.12  | 5.47E-05       |
|          |              |                | ES   | + | chr2:26792501-26792833    | NA                       | -0.254 | 0.000514199217 |
| CENPU    | -1.734265274 | 1.29E-05       | ES   | - | chr4:184700819-184700881  | NA                       | -0.484 | 0              |
|          |              |                | MXE  | - | chr4:184697646-184697803  | chr4:184700819-184700881 | -0.15  | 1.65E-07       |
| CENPV    | 6.07890014   | 5.41E-34       | A3SS | - | chr17:16348615-16349333   | chr17:16348615-16348685  | -0.676 | 2.77E-12       |
|          |              |                | ES   | - | chr17:16349139-16349333   | NA                       | -0.682 | 5.11E-08       |
| CEP192   | 1.04466848   | 0.01026137748  | RI   | + | chr18:13057584-13059312   | NA                       | -0.287 | 0              |
|          |              |                | ES   | + | chr18:13058293-13058435   | NA                       | -0.104 | 1.04E-05       |
| CEP41    | -2.976284071 | 2.58E-19       | ES   | - | chr7:130400038-130400254  | NA                       | 0.189  | 7.13E-06       |
| CEP57L1  | 1.105833171  | 0.02166298656  | ES   | + | chr6:109106034-109106090  | NA                       | -0.427 | 0.000731961416 |

|          |              |                |      |   |                           |                          |  |        |                |
|----------|--------------|----------------|------|---|---------------------------|--------------------------|--|--------|----------------|
|          |              |                | ES   | + | chr6:109155790-109155877  | NA                       |  | -0.116 | 0.001692970305 |
|          |              |                | ES   | + | chr6:109145218-109145381  | NA                       |  | 0.161  | 0.04168586939  |
| CEP70    | 1.735715871  | 0.001458130752 | A3SS | - | chr3:138572858-138572984  | chr3:138572858-138572932 |  | 0.362  | 0.000477228309 |
| CEP72    | 1.882470845  | 3.36E-07       | ES   | + | chr5:665940-666099        | NA                       |  | -0.538 | 1.80E-07       |
| CEP85L   | -1.700958305 | 0.02196281938  | MXE  | - | chr6:118491685-118491865  | chr6:118511297-118511415 |  | 0.153  | 0.04132591343  |
| CFAP44   | -1.662966401 | 0.001218901552 | ES   | - | chr3:113344515-113344712  | NA                       |  | 0.248  | 0.001534015222 |
|          |              |                | ES   | - | chr3:113409105-113409322  | NA                       |  | 0.236  | 0.003084990753 |
|          |              |                | ES   | - | chr3:113333405-113333583  | NA                       |  | 0.174  | 0.02483827348  |
| CHFR     | -4.3815182   | 1.70E-31       | ES   | - | chr12:132869618-132869834 | NA                       |  | 0.261  | 0.000138240809 |
|          |              |                | ES   | - | chr12:132869618-132869798 | NA                       |  | 0.231  | 0.000242143471 |
|          |              |                | ES   | - | chr12:132870723-132870783 | NA                       |  | 0.113  | 0.009067303247 |
| CHN1     | -1.329591775 | 0.000500387181 | ES   | - | chr2:174945169-174945261  | NA                       |  | -0.138 | 0.009304957146 |
| CHORDC1  | 1.807189398  | 0.000898165270 | ES   | - | chr11:90206747-90206810   | NA                       |  | -0.12  | 3.29E-05       |
| CHPF2    | -1.997068952 | 0.001300539951 | ES   | + | chr7:151236955-151237172  | NA                       |  | 0.137  | 0.000336201988 |
| CHURC1   | -1.999784717 | 6.11E-05       | ES   | + | chr14:64926009-64926080   | NA                       |  | 0.109  | 9.60E-08       |
| CIB1     | 1.975761493  | 2.09E-05       | MXE  | - | chr15:90232218-90232327   | chr15:90233668-90233703  |  | 0.112  | 0.01287962329  |
| CIRBP    | -1.846245573 | 0.000636699871 | RI   | + | chr19:1271980-1274440     | NA                       |  | -0.142 | 5.48E-11       |
|          |              |                | ES   | + | chr19:1273493-1273715     | NA                       |  | -0.369 | 9.30E-07       |
|          |              |                | ES   | + | chr19:1273600-1273715     | NA                       |  | -0.456 | 1.72E-06       |
|          |              |                | RI   | + | chr19:1271980-1273172     | NA                       |  | 0.145  | 7.01E-05       |
| CITED1   | -4.037283125 | 1.35E-05       | ES   | - | chrX:72305301-72305422    | NA                       |  | -0.169 | 0.00029790281  |
| CIZ1     | -1.126964478 | 0.01685817668  | MXE  | - | chr9:128187862-128187934  | chr9:128190328-128190444 |  | 0.137  | 0.0168551311   |
| CLASP1   | -1.87962099  | 5.14E-07       | ES   | - | chr2:121409023-121409047  | NA                       |  | -0.444 | 9.89E-07       |
|          |              |                | ES   | - | chr2:121445448-121445496  | NA                       |  | 0.3    | 4.70E-05       |
| CLCN2    | -1.577793902 | 0.00326854886  | A3SS | - | chr3:184354547-184354714  | chr3:184354547-184354658 |  | -0.555 | 3.27E-05       |
| CLEC2B   | 2.653662736  | 9.42E-07       | ES   | - | chr12:9862498-9862573     | NA                       |  | 0.149  | 4.64E-06       |
| CLEC2D   | -1.568440398 | 0.000191776461 | ES   | + | chr12:9693824-9693948     | NA                       |  | 0.461  | 5.17E-05       |
|          |              |                | ES   | + | chr12:9693415-9693948     | NA                       |  | 0.21   | 0.000432013183 |
|          |              |                | ES   | + | chr12:9692827-9693948     | NA                       |  | 0.153  | 0.000987478066 |
|          |              |                | ES   | + | chr12:9692827-9692931     | NA                       |  | 0.167  | 0.001097891832 |
|          |              |                | ES   | + | chr12:9693033-9693115     | NA                       |  | 0.395  | 0.02024804826  |
| CLK1     | -1.121236214 | 0.01885873773  | RI   | - | chr2:200859679-200861466  | NA                       |  | -0.38  | 5.85E-11       |
| CLK4     | -1.941223901 | 3.54E-06       | RI   | - | chr5:178616881-178618778  | NA                       |  | -0.481 | 1.16E-13       |
|          |              |                | RI   | - | chr5:178617343-178618778  | NA                       |  | -0.336 | 9.82E-08       |
|          |              |                | A3SS | - | chr5:178619837-178620673  | chr5:178619837-178619896 |  | 0.302  | 4.40E-05       |
|          |              |                | ES   | - | chr5:178619837-178619896  | NA                       |  | -0.17  | 0.000432013183 |
|          |              |                | ES   | - | chr5:178619837-178620673  | NA                       |  | -0.125 | 0.000805592955 |
|          |              |                | RI   | - | chr5:178616881-178618778  | NA                       |  | -0.325 | 0.00639004427  |
| CLN6     | -1.011937542 | 0.04139550145  | A5SS | - | chr15:68211555-68211863   | chr15:68211674-68211863  |  | 0.117  | 0.0269999003   |
| CNTLN    | -1.707947443 | 0.00709396116  | MXE  | + | chr9:17273732-17273866    | chr9:17298189-17298352   |  | -0.54  | 6.62E-10       |
| COA1     | -1.041327704 | 0.000316425810 | ES   | - | chr7:43650611-43650712    | NA                       |  | 0.256  | 0              |
|          |              |                | ES   | - | chr7:43650492-43650712    | NA                       |  | 0.171  | 0              |
|          |              |                | ES   | - | chr7:43656032-43656153    | NA                       |  | -0.166 | 6.41E-13       |
|          |              |                | ES   | - | chr7:43665657-43665722    | NA                       |  | -0.299 | 5.25E-12       |
|          |              |                | ES   | - | chr7:43650611-43650712    | NA                       |  | 0.536  | 8.02E-12       |
|          |              |                | MXE  | - | chr7:43656032-43656153    | chr7:43665657-43665722   |  | 0.198  | 1.72E-06       |
|          |              |                | ES   | - | chr7:43650611-43650712    | NA                       |  | 0.425  | 1.83E-06       |
|          |              |                | ES   | - | chr7:43665657-43665722    | NA                       |  | 0.29   | 1.78E-05       |
|          |              |                | ES   | - | chr7:43656032-43656153    | NA                       |  | -0.194 | 8.02E-05       |
|          |              |                | A5SS | - | chr7:43650492-43650712    | chr7:43650611-43650712   |  | -0.196 | 0.007807705261 |
| COL12A1  | 3.37911517   | 0.002110433248 | ES   | - | chr6:75138319-75138340    | NA                       |  | -0.133 | 0.006341438047 |
| COL4A3BP | -1.373986406 | 0.03973000025  | ES   | - | chr5:75399309-75399387    | NA                       |  | -0.146 | 2.38E-05       |
| COMMD3   | 1.009450084  | 0.006532714084 | RI   | + | chr10:22318271-22318713   | NA                       |  | -0.116 | 0.000248055687 |
| COX11    | -1.49664347  | 0.000561712389 | A3SS | - | chr17:54961118-54962915   | chr17:54961118-54961312  |  | 0.114  | 7.79E-06       |
| CPEB2    | -2.183944531 | 0.000149995678 | A5SS | + | chr4:15007304-15007595    | chr4:15007304-15007586   |  | -0.18  | 0.000151410115 |
|          |              |                | ES   | + | chr4:15040463-15040487    | NA                       |  | -0.139 | 0.002054465018 |
| CPM      | -3.507635036 | 0.001723473239 | A5SS | - | chr12:68933141-68933202   | chr12:68933159-68933202  |  | -0.432 | 5.28E-05       |
|          |              |                | A5SS | - | chr12:68933141-68933199   | chr12:68933169-68933199  |  | -0.431 | 0.01433723906  |
| CPNE3    | 1.493605788  | 0.000288857600 | ES   | + | chr8:86524876-86524997    | NA                       |  | 0.406  | 4.50E-07       |
| CROCCP2  | 1.589934001  | 0.000347377200 | ES   | - | chr1:16642766-16642850    | NA                       |  | -0.292 | 0.0125683966   |

|              |              |                |      |   |                           |                          |        |                |
|--------------|--------------|----------------|------|---|---------------------------|--------------------------|--------|----------------|
|              |              |                | MXE  | - | chr1:16635026-16635168    | chr1:16642766-16642850   | -0.24  | 0.01637989376  |
|              |              |                | ES   | - | chr1:16643027-16643145    | NA                       | -0.19  | 0.0290614872   |
| CSPP1        | 1.075755792  | 0.01232382156  | ES   | + | chr8:67172768-67172973    | NA                       | 0.222  | 2.44E-07       |
| CTC-308K20.1 | 4.217809789  | 3.39E-10       | RI   | - | chr5:172957153-172958257  | NA                       | -0.484 | 1.27E-07       |
| CTC1         | 1.799988321  | 2.65E-06       | RI   | - | chr17:8229890-8230468     | NA                       | 0.204  | 0.001464590268 |
| CTD-2341M24. | 1.475568801  | 0.03769661099  | ES   | + | chr14:86128664-86128773   | NA                       | -0.612 | 5.70E-05       |
| CUL5         | 1.13192506   | 0.003545923711 | ES   | + | chr11:108104189-108104902 | NA                       | -0.466 | 0              |
| CYB5R2       | 4.606681285  | 7.55E-05       | RI   | - | chr11:7668477-7672523     | NA                       | -0.382 | 0.003244746418 |
| DAG1         | -1.728892896 | 0.000233466817 | ES   | + | chr3:49470964-49471049    | NA                       | 0.562  | 2.12E-05       |
|              |              |                | ES   | + | chr3:49487253-49487415    | NA                       | 0.199  | 0.002308161594 |
|              |              |                | A5SS | + | chr3:49476848-49476905    | chr3:49476848-49476900   | 0.565  | 0.008667503029 |
|              |              |                | MXE  | + | chr3:49470964-49471049    | chr3:49476848-49476905   | 0.277  | 0.03468750359  |
| DCLK2        | -2.814230064 | 0.000336253814 | ES   | + | chr4:150253473-150253556  | NA                       | 0.488  | 7.92E-10       |
| DDIT3        | 2.215673428  | 6.49E-05       | RI   | - | chr12:57517268-57517753   | NA                       | 0.147  | 0.00342269305  |
|              |              |                | A3SS | - | chr12:57517268-57517595   | chr12:57517268-57517424  | 0.149  | 0.0401411959   |
|              |              |                | RI   | - | chr12:57517268-57517753   | NA                       | 0.12   | 0.04122650279  |
| DDR1         | -3.42640979  | 0.001650917708 | ES   | + | chr6:30885624-30885680    | NA                       | 0.447  | 0.000114666020 |
|              |              |                | ES   | + | chr6:30884537-30884710    | NA                       | 0.449  | 0.000141064512 |
|              |              |                | ES   | + | chr6:30895403-30895514    | NA                       | 0.192  | 0.01899892488  |
| DENND5A      | -1.518925004 | 2.45E-06       | ES   | - | chr11:9176771-9176902     | NA                       | 0.13   | 3.99E-12       |
|              |              |                | ES   | - | chr11:9143402-9143485     | NA                       | -0.105 | 0.02294288612  |
|              |              |                | ES   | - | chr11:9142721-9143485     | NA                       | -0.117 | 0.02602112914  |
| DGUOK        | -1.026493349 | 0.006999614181 | ES   | + | chr2:73950626-73950732    | NA                       | -0.113 | 1.12E-08       |
|              |              |                | MXE  | + | chr2:73946718-73946906    | chr2:73957124-73957240   | 0.163  | 3.19E-05       |
|              |              |                | ES   | + | chr2:73950600-73950732    | NA                       | -0.168 | 0.000113494923 |
|              |              |                | MXE  | + | chr2:73946718-73946906    | chr2:73950584-73950732   | 0.172  | 0.000147455171 |
|              |              |                | MXE  | + | chr2:73946718-73946906    | chr2:73957124-73957240   | 0.158  | 0.000238790189 |
|              |              |                | MXE  | + | chr2:73938909-73939022    | chr2:73957124-73957240   | 0.133  | 0.00191291694  |
|              |              |                | ES   | + | chr2:73957124-73957240    | NA                       | -0.204 | 0.002786142805 |
|              |              |                | ES   | + | chr2:73950584-73950732    | NA                       | -0.101 | 0.007035617093 |
|              |              |                | MXE  | + | chr2:73938909-73939022    | chr2:73950584-73950732   | 0.157  | 0.00925802358  |
| DHX34        | 1.266315824  | 0.003350781558 | ES   | + | chr19:47376914-47376989   | NA                       | -0.308 | 0.008437561811 |
| DMTF1        | -1.362356312 | 0.000684214166 | ES   | + | chr7:87194683-87194828    | NA                       | 0.205  | 4.66E-08       |
| DNAJC4       | 2.04947275   | 4.07E-07       | ES   | + | chr11:64231031-64231147   | NA                       | -0.445 | 0.03833779699  |
| DNHD1        | 1.743757735  | 0.000175070153 | RI   | + | chr11:6497584-6498961     | NA                       | -0.604 | 1.49E-08       |
| DNM1         | -1.940673073 | 0.02316430587  | MXE  | + | chr9:128224250-128224389  | chr9:128226034-128226173 | -0.438 | 2.11E-05       |
|              |              |                | ES   | + | chr9:128240986-128241047  | NA                       | -0.22  | 0.04612861764  |
| DNM3         | -2.772483874 | 0.000743564357 | ES   | + | chr1:172093695-172093725  | NA                       | -0.149 | 0.001174848614 |
| DNMT3A       | -1.269829176 | 0.004865294804 | ES   | - | chr2:25239314-25239513    | NA                       | 0.13   | 0.001496409421 |
| DOCK10       | -5.317664304 | 5.21E-20       | A3SS | - | chr2:224805407-224805529  | chr2:224805407-224805502 | 0.187  | 0.004936945245 |
| DOK1         | -1.831450135 | 0.001437456887 | ES   | + | chr2:74555893-74556078    | NA                       | 0.164  | 5.43E-05       |
| DOLPP1       | -2.518584887 | 1.15E-06       | ES   | + | chr9:129086138-129086267  | NA                       | 0.101  | 0.01074850663  |
| DOPEY1       | -1.404679516 | 0.04143512895  | MXE  | + | chr6:83147235-83147291    | chr6:83148758-83148863   | -0.179 | 0.01456348202  |
| DPM2         | -1.183995468 | 0.03880813815  | RI   | - | chr9:127936552-127937523  | NA                       | 0.183  | 9.37E-07       |
| DUS1L        | 1.350888534  | 0.03015202888  | RI   | - | chr17:82061208-82061721   | NA                       | -0.208 | 0.002439817932 |
| DYNC2H1      | 2.176882976  | 1.49E-10       | ES   | + | chr11:103287532-103287605 | NA                       | -0.228 | 1.53E-05       |
| DZANK1       | -1.213273265 | 0.005928809403 | A3SS | - | chr20:18412645-18412853   | chr20:18412645-18412835  | -0.791 | 1.24E-12       |
| ECHDC2       | 6.681644148  | 1.60E-22       | ES   | - | chr1:52905033-52906611    | NA                       | -0.209 | 0.000864396411 |
| ECSIT        | 1.639205203  | 0.0017216827   | ES   | - | chr19:11519074-11519193   | NA                       | -0.11  | 0.001119481664 |
| EFHC1        | 2.799524328  | 1.29E-08       | A3SS | + | chr6:52454061-52454287    | chr6:52454094-52454287   | 0.24   | 0.000251187674 |
|              |              |                | ES   | + | chr6:52488556-52488675    | NA                       | -0.223 | 0.000645485187 |
|              |              |                | RI   | + | chr6:52452687-52454287    | NA                       | 0.172  | 0.006772555752 |
| EIF1AX       | -1.34560509  | 0.004202077406 | ES   | - | chrX:20132181-20132263    | NA                       | 0.231  | 0.02363008235  |
| EIF3E        | 2.189769702  | 6.97E-08       | ES   | - | chr8:108242111-108242346  | NA                       | -0.195 | 0.000158041518 |
| EIF4A2       | 1.027788198  | 0.01535765521  | ES   | + | chr3:186784961-186785101  | NA                       | 0.29   | 0              |
|              |              |                | RI   | + | chr3:186784563-186786051  | NA                       | 0.153  | 4.57E-06       |
|              |              |                | MXE  | + | chr3:186784961-186785101  | chr3:186786163-186786273 | 0.108  | 3.42E-05       |
|              |              |                | ES   | + | chr3:186788309-186788416  | NA                       | -0.195 | 0.000992879108 |
|              |              |                | ES   | + | chr3:186788309-186788420  | NA                       | -0.222 | 0.00365172218  |
| ELOVL5       | 2.212994865  | 4.89E-07       | ES   | - | chr6:53273219-53273344    | NA                       | 0.12   | 0              |

|          |              |                |      |   |                          |                          |        |                |
|----------|--------------|----------------|------|---|--------------------------|--------------------------|--------|----------------|
|          |              |                | MXE  | - | chr6:53290094-53290189   | chr6:53290400-53290535   | -0.319 | 0.000453694653 |
|          |              |                | MXE  | - | chr6:53287861-53287942   | chr6:53290094-53290189   | 0.217  | 0.000926774312 |
|          |              |                | ES   | - | chr6:53290400-53290535   | NA                       | -0.395 | 0.003902246943 |
| EMC8     | -1.024324004 | 0.02758436408  | ES   | - | chr16:85780378-85780473  | NA                       | 0.164  | 1.58E-13       |
| EMILIN2  | -9.817925615 | 1.18E-35       | MXE  | + | chr18:2884963-2885139    | chr18:2890560-2892486    | -0.309 | 9.76E-05       |
| EML1     | -2.320998196 | 0.000182923670 | ES   | + | chr14:99914565-99914697  | NA                       | 0.141  | 0.01019963675  |
| EMSY     | 1.149535574  | 0.001106280874 | ES   | + | chr11:76535894-76536059  | NA                       | 0.231  | 1.35E-06       |
| ENGASE   | 1.344762342  | 0.02455274659  | A5SS | + | chr17:79081897-79082877  | chr17:79081897-79082063  | 0.365  | 1.43E-06       |
|          |              |                | ES   | + | chr17:79083481-79083590  | NA                       | 0.201  | 0.0149867324   |
| ENO3     | -1.927766405 | 0.0259800486   | ES   | + | chr17:4952024-4952147    | NA                       | 0.139  | 0.00490899262  |
| ENTPD1   | -5.669436679 | 1.28E-06       | ES   | + | chr10:95842343-95842494  | NA                       | 0.413  | 0.000150335610 |
| ENTPD6   | 1.140937453  | 0.006258935377 | ES   | + | chr20:25207075-25207397  | NA                       | 0.27   | 1.31E-05       |
|          |              |                | ES   | + | chr20:25207078-25207397  | NA                       | 0.274  | 1.54E-05       |
|          |              |                | ES   | + | chr20:25221231-25221333  | NA                       | -0.148 | 0.000203737327 |
| EOGT     | 2.54815863   | 4.75E-13       | RI   | - | chr3:68988505-68989017   | NA                       | -0.162 | 0.04266975874  |
| EPS8L2   | 3.084997859  | 2.89E-05       | RI   | + | chr11:709552-710486      | NA                       | -0.571 | 1.48E-06       |
| ERCC3    | -1.077530913 | 0.000362829510 | RI   | - | chr2:127289336-127289824 | NA                       | 0.142  | 8.44E-05       |
| ESYT2    | 1.269970749  | 1.59E-06       | MXE  | - | chr7:158748193-158748280 | chr7:158749648-158749723 | 0.142  | 0              |
|          |              |                | ES   | - | chr7:158752780-158752843 | NA                       | 0.166  | 0              |
|          |              |                | MXE  | - | chr7:158737047-158737179 | chr7:158739022-158739121 | 0.124  | 0.000613981788 |
|          |              |                | ES   | - | chr7:158752780-158752843 | NA                       | 0.346  | 0.001829980388 |
| ETNK2    | 1.587366752  | 9.65E-07       | ES   | - | chr1:204134514-204134694 | NA                       | -0.161 | 0.03472346189  |
| ETV1     | -2.039385166 | 1.60E-07       | ES   | - | chr7:13989267-13989464   | NA                       | 0.291  | 9.08E-05       |
| EVI5     | -1.39108446  | 0.004666592538 | ES   | - | chr1:92663419-92663452   | NA                       | -0.515 | 0.000226627216 |
| EZH2     | -1.393782233 | 5.05E-05       | ES   | - | chr7:148836821-148837000 | NA                       | 0.269  | 0.000373023368 |
| FADS3    | 2.588280271  | 2.88E-09       | RI   | - | chr11:61876358-61876963  | NA                       | 0.185  | 0.009886221094 |
| FAM107B  | -2.376139257 | 0.000771160333 | ES   | - | chr10:14553321-14553387  | NA                       | -0.202 | 0.01165258035  |
| FAM111A  | 1.434909359  | 9.61E-05       | A3SS | + | chr11:59148703-59148953  | chr11:59148835-59148953  | 0.327  | 0.000441187003 |
|          |              |                | A3SS | + | chr11:59148796-59148953  | chr11:59148835-59148953  | 0.215  | 0.003383676778 |
| FAM120C  | -3.415820507 | 1.51E-11       | ES   | - | chrX:54087754-54087964   | NA                       | 0.163  | 0.002895587267 |
|          |              |                | ES   | - | chrX:54085714-54085916   | NA                       | 0.142  | 0.005509184309 |
| FAM13B   | -1.149549599 | 0.001024926722 | ES   | - | chr5:138018954-138019146 | NA                       | -0.522 | 3.97E-08       |
|          |              |                | ES   | - | chr5:137946227-137946311 | NA                       | -0.339 | 3.76E-05       |
|          |              |                | ES   | - | chr5:137956476-137956542 | NA                       | -0.265 | 0.002442117802 |
| FAM175A  | 1.108223786  | 0.0158683899   | ES   | - | chr4:83470202-83470396   | NA                       | 0.107  | 0.03069639954  |
| FAM189B  | 1.18974639   | 0.01094929775  | ES   | - | chr1:155250275-155250929 | NA                       | -0.18  | 0.001414702212 |
|          |              |                | ES   | - | chr1:155250275-155250821 | NA                       | -0.133 | 0.004324272947 |
|          |              |                | ES   | - | chr1:155251094-155251164 | NA                       | 0.295  | 0.005179405283 |
|          |              |                | ES   | - | chr1:155253858-155253978 | NA                       | -0.24  | 0.008470168692 |
| FAM208A  | 1.166974884  | 0.0186427278   | A3SS | - | chr3:56633043-56633966   | chr3:56633043-56633843   | -0.155 | 2.29E-06       |
|          |              |                | A3SS | - | chr3:56633043-56633966   | chr3:56633043-56633843   | -0.224 | 4.33E-06       |
|          |              |                | ES   | - | chr3:56638705-56638765   | NA                       | -0.106 | 0.000113089307 |
| FAM210A  | 2.304700909  | 0.000283937542 | ES   | - | chr18:13671861-13671973  | NA                       | 0.142  | 0.000175916401 |
| FAM3A    | 1.15564421   | 0.01331123808  | MXE  | - | chrX:154511847-154511871 | chrX:154512822-154512936 | -0.138 | 0.000112173190 |
|          |              |                | RI   | - | chrX:154515759-154516242 | NA                       | -0.192 | 0.00491760265  |
| FAM49B   | 1.891508876  | 0.002892038074 | MXE  | - | chr8:129904498-129904585 | chr8:129970942-129970995 | 0.151  | 0.001100968158 |
|          |              |                | ES   | - | chr8:129904498-129904585 | NA                       | -0.157 | 0.006151912774 |
|          |              |                | MXE  | - | chr8:129879596-129879789 | chr8:129896748-129896854 | 0.146  | 0.01128144421  |
| FAM66C   | -1.945290987 | 3.52E-05       | ES   | + | chr12:8195276-8195412    | NA                       | 0.396  | 0.02043424899  |
|          |              |                | ES   | + | chr12:8187731-8188225    | NA                       | -0.229 | 0.03557962837  |
| FAM86B3P | 1.958737718  | 7.41E-05       | ES   | + | chr8:8234482-8234584     | NA                       | 0.64   | 0.01525821969  |
| FAM86C1  | 1.275477784  | 0.02080754254  | MXE  | + | chr11:71791738-71791819  | chr11:71793379-71793481  | -0.395 | 0.00664473448  |
|          |              |                | MXE  | + | chr11:71791735-71791819  | chr11:71793379-71793481  | -0.231 | 0.01960597291  |
| FAXDC2   | -8.26761745  | 6.82E-33       | A5SS | - | chr5:154823307-154823592 | chr5:154823386-154823592 | 0.969  | 1.44E-12       |
| FBXL2    | 1.808411585  | 0.01647970542  | MXE  | + | chr3:33297868-33297962   | chr3:33364624-33364719   | 0.214  | 0.001031064798 |
|          |              |                | ES   | + | chr3:33297868-33297962   | NA                       | 0.342  | 0.002142500663 |
|          |              |                | MXE  | + | chr3:33297868-33297962   | chr3:33359282-33359357   | 0.262  | 0.01098908084  |
| FBXO24   | 1.407262694  | 0.03379967997  | ES   | + | chr7:100595101-100595223 | NA                       | -0.414 | 6.11E-06       |
| FCHSD1   | 2.542522501  | 5.64E-10       | A3SS | - | chr5:141644858-141644942 | chr5:141644858-141644938 | -0.113 | 0.003195651006 |
| FEZ2     | 1.606738363  | 0.003314191503 | MXE  | - | chr2:36555682-36555748   | chr2:36558437-36558513   | 0.176  | 0              |



|        |              |                |  |      |   |                           |                          |        |                |
|--------|--------------|----------------|--|------|---|---------------------------|--------------------------|--------|----------------|
|        |              |                |  | MXE  | - | chr2:36558437-36558513    | chr2:36560784-36560865   | 0.131  | 0              |
|        |              |                |  | ES   | - | chr2:36560784-36560865    | NA                       | 0.225  | 0              |
|        |              |                |  | ES   | - | chr2:36560784-36560865    | NA                       | -0.201 | 0.000209617447 |
|        |              |                |  | MXE  | - | chr2:36555682-36555748    | chr2:36558437-36558513   | -0.108 | 0.003486529079 |
|        |              |                |  | ES   | - | chr2:36560784-36560865    | NA                       | 0.386  | 0.006549900596 |
| FGFR2  | -1.679881674 | 0.0404314925   |  | ES   | - | chr10:121565636-121565704 | NA                       | -0.539 | 0.008407926613 |
|        |              |                |  | ES   | - | chr10:121565437-121565704 | NA                       | -0.411 | 0.01160808791  |
| FHL2   | 3.387355058  | 7.06E-05       |  | ES   | - | chr2:105396646-105396697  | NA                       | -0.659 | 1.87E-07       |
|        |              |                |  | ES   | - | chr2:105396646-105396697  | NA                       | -0.59  | 0.02228946003  |
| FIS1   | -1.122048494 | 0.01266671626  |  | ES   | - | chr7:101244006-101244139  | NA                       | 0.152  | 0              |
| FNIP2  | -1.346893651 | 0.01328457477  |  | ES   | + | chr4:158833800-158833890  | NA                       | -0.447 | 0.000114599384 |
| FNTB   | -1.997061983 | 1.60E-06       |  | ES   | + | chr14:65032358-65032521   | NA                       | 0.679  | 5.36E-09       |
| FRG1BP | 2.113799438  | 0.001486390724 |  | ES   | + | chr20:30391196-30391308   | NA                       | 0.796  | 0              |
| FRG1CP | 5.838530862  | 2.66E-23       |  | MXE  | - | chr20:28588642-28588757   | chr20:28591393-28591519  | -0.364 | 6.65E-05       |
| FUS    | -1.199979067 | 0.001206886185 |  | RI   | + | chr16:31184938-31188357   | NA                       | -0.141 | 6.33E-13       |
| FUZ    | -5.489171703 | 6.01E-24       |  | A5SS | - | chr19:49812446-49812736   | chr19:49812614-49812736  | 0.806  | 1.10E-09       |
|        |              |                |  | A5SS | - | chr19:49812446-49812736   | chr19:49812637-49812736  | 0.508  | 1.43E-06       |
|        |              |                |  | A5SS | - | chr19:49812614-49812736   | chr19:49812637-49812736  | 0.214  | 0.000503434802 |
|        |              |                |  | ES   | - | chr19:49812446-49812685   | NA                       | 0.212  | 0.001680905192 |
|        |              |                |  | ES   | - | chr19:49812446-49812736   | NA                       | 0.142  | 0.001793405002 |
|        |              |                |  | MXE  | - | chr19:49812250-49812335   | chr19:49812446-49812736  | 0.511  | 0.006041335787 |
|        |              |                |  | A3SS | - | chr19:49811362-49811491   | chr19:49811362-49811467  | 0.594  | 0.03982276621  |
| FYN    | -2.80300083  | 3.86E-21       |  | MXE  | - | chr6:111699514-111699670  | chr6:111700103-111700268 | -0.349 | 0              |
|        |              |                |  | MXE  | - | chr6:111696276-111696456  | chr6:111700103-111700268 | -0.155 | 1.01E-06       |
|        |              |                |  | ES   | - | chr6:111846588-111846629  | NA                       | 0.25   | 1.07E-06       |
| GAA    | 1.240166167  | 0.0264254815   |  | ES   | + | chr17:80101810-80101890   | NA                       | -0.367 | 8.37E-06       |
|        |              |                |  | A5SS | + | chr17:80101810-80101925   | chr17:80101810-80101890  | 0.217  | 0.000394146704 |
| GAB1   | -3.007152327 | 1.63E-17       |  | ES   | + | chr4:143457679-143457769  | NA                       | 0.485  | 1.31E-05       |
| GALNT7 | -1.317781676 | 0.001760688009 |  | MXE  | + | chr4:173297794-173297977  | chr4:173298114-173298297 | -0.185 | 0.000488484178 |
|        |              |                |  | MXE  | + | chr4:173297794-173297977  | chr4:173298114-173298297 | -0.152 | 0.008807758448 |
| GAS5   | 1.714774757  | 0.001737349134 |  | MXE  | - | chr1:173865470-173865547  | chr1:173865856-173865894 | -0.266 | 0              |
|        |              |                |  | MXE  | - | chr1:173865856-173865894  | chr1:173866527-173866796 | 0.254  | 0              |
|        |              |                |  | MXE  | - | chr1:173865856-173865894  | chr1:173866176-173866206 | 0.232  | 0              |
|        |              |                |  | RI   | - | chr1:173864256-173865282  | NA                       | 0.15   | 0              |
|        |              |                |  | MXE  | - | chr1:173865509-173865547  | chr1:173866176-173866206 | 0.233  | 0              |
|        |              |                |  | RI   | - | chr1:173865228-173865547  | NA                       | 0.436  | 0              |
|        |              |                |  | A5SS | - | chr1:173865470-173865547  | chr1:173865509-173865547 | 0.477  | 0              |
|        |              |                |  | MXE  | - | chr1:173864674-173864704  | chr1:173865228-173865282 | -0.224 | 0              |
|        |              |                |  | MXE  | - | chr1:173865509-173865547  | chr1:173865856-173866206 | 0.274  | 0              |
|        |              |                |  | MXE  | - | chr1:173864483-173864506  | chr1:173865228-173865282 | -0.124 | 6.96E-12       |
|        |              |                |  | MXE  | - | chr1:173865509-173865547  | chr1:173865856-173865894 | 0.154  | 2.88E-11       |
|        |              |                |  | MXE  | - | chr1:173864674-173864704  | chr1:173865228-173865282 | 0.206  | 5.01E-11       |
|        |              |                |  | RI   | - | chr1:173864483-173864704  | NA                       | 0.206  | 4.03E-10       |
|        |              |                |  | MXE  | - | chr1:173865470-173865547  | chr1:173866176-173866206 | -0.232 | 1.87E-09       |
|        |              |                |  | RI   | - | chr1:173864256-173864506  | NA                       | 0.171  | 1.09E-08       |
|        |              |                |  | MXE  | - | chr1:173865856-173865894  | chr1:173866760-173866796 | 0.229  | 1.36E-07       |
|        |              |                |  | MXE  | - | chr1:173865228-173865282  | chr1:173865470-173865547 | 0.121  | 1.59E-05       |
|        |              |                |  | MXE  | - | chr1:173865228-173865547  | chr1:173866176-173866206 | -0.198 | 2.31E-05       |
|        |              |                |  | MXE  | - | chr1:173865509-173865547  | chr1:173866527-173866567 | 0.214  | 6.74E-05       |
|        |              |                |  | MXE  | - | chr1:173865470-173865547  | chr1:173866527-173866567 | -0.194 | 8.27E-05       |
|        |              |                |  | MXE  | - | chr1:173865856-173865894  | chr1:173866527-173866567 | 0.25   | 0.000377180693 |
|        |              |                |  | ES   | - | chr1:173864674-173864704  | NA                       | -0.223 | 0.000528708466 |
|        |              |                |  | MXE  | - | chr1:173866760-173866796  | chr1:173866990-173867043 | -0.166 | 0.008854126289 |
| GLS    | -1.265784768 | 0.006881038643 |  | ES   | + | chr2:190913192-190913364  | NA                       | -0.119 | 2.51E-07       |
|        |              |                |  | ES   | + | chr2:190920214-190920248  | NA                       | -0.395 | 0.000238932773 |
|        |              |                |  | MXE  | + | chr2:190913192-190913364  | chr2:190920214-190920248 | 0.17   | 0.000383469829 |
|        |              |                |  | ES   | + | chr2:190913192-190913364  | NA                       | 0.115  | 0.001084209801 |
| GMIP   | 1.243604304  | 0.03907621375  |  | ES   | - | chr19:19634506-19634703   | NA                       | 0.187  | 0.02076062402  |
| GNRHR2 | 1.733210137  | 0.007101758843 |  | RI   | + | chr1:145919343-145919900  | NA                       | -0.257 | 0.002073595908 |
| GOLGA2 | -2.170339054 | 3.30E-06       |  | RI   | - | chr9:128262562-128263092  | NA                       | 0.313  | 2.48E-07       |

|           |              |                |      |   |                           |                          |  |        |                |
|-----------|--------------|----------------|------|---|---------------------------|--------------------------|--|--------|----------------|
|           |              |                | ES   | - | chr9:128272784-128272865  | NA                       |  | -0.197 | 0.04068278322  |
| GOLT1B    | 1.587493058  | 0.000115319109 | ES   | + | chr12:21508382-21508561   | NA                       |  | -0.101 | 6.35E-09       |
|           |              |                | ES   | + | chr12:21507943-21508109   | NA                       |  | -0.315 | 5.26E-07       |
| GPBP1     | -1.335598319 | 0.004324841391 | ES   | + | chr5:57237112-57237172    | NA                       |  | -0.19  | 1.14E-08       |
| GPCPD1    | -2.600260486 | 2.66E-09       | ES   | - | chr20:5586193-5586269     | NA                       |  | -0.46  | 0.003724555554 |
| GPM6A     | -4.887951774 | 9.76E-15       | ES   | - | chr4:175812190-175812249  | NA                       |  | -0.649 | 2.67E-10       |
| GPR155    | -3.944168043 | 2.57E-07       | ES   | - | chr2:174482872-174482918  | NA                       |  | -0.246 | 8.71E-05       |
|           |              |                | ES   | - | chr2:174482872-174482918  | NA                       |  | -0.231 | 0.000149459279 |
| GPR157    | 1.555173699  | 0.01091927609  | ES   | - | chr1:9105485-9105680      | NA                       |  | -0.412 | 0.00512657653  |
| GPR158    | -2.873095031 | 4.71E-17       | MXE  | + | chr10:25412249-25412473   | chr10:25466650-25466719  |  | -0.612 | 4.45E-12       |
| GRB10     | -3.972812942 | 1.02E-10       | ES   | - | chr7:50732271-50732368    | NA                       |  | 0.158  | 0.002538626055 |
|           |              |                | ES   | - | chr7:50710874-50710990    | NA                       |  | 0.197  | 0.00375709255  |
|           |              |                | MXE  | - | chr7:50732271-50732368    | chr7:50755886-50756056   |  | 0.133  | 0.003775870552 |
|           |              |                | MXE  | - | chr7:50710874-50710990    | chr7:50755886-50756056   |  | 0.18   | 0.03407818423  |
| GTF2IP1   | -3.267517506 | 9.27E-11       | ES   | - | chr7:75202541-75202613    | NA                       |  | 0.111  | 0.0239620042   |
| GULP1     | -2.526194695 | 1.91E-09       | ES   | + | chr2:188584264-188584403  | NA                       |  | -0.787 | 0              |
| HACL1     | 1.526402891  | 0.00422753797  | ES   | - | chr3:15574976-15575082    | NA                       |  | 0.111  | 0.000315974689 |
| HAUS4     | 1.0448497    | 0.01855474263  | A5SS | - | chr14:22956745-22957094   | chr14:22956915-22957094  |  | 0.171  | 0.03020364092  |
| HCFC1R1   | 2.47347224   | 7.42E-07       | ES   | - | chr16:3023473-3023530     | NA                       |  | -0.28  | 0.007123014945 |
| HDLBP     | -1.473395602 | 1.15E-05       | ES   | - | chr2:241269360-241269561  | NA                       |  | 0.129  | 2.19E-07       |
|           |              |                | A5SS | - | chr2:241269200-241269295  | chr2:241269205-241269295 |  | 0.332  | 0.02387795607  |
|           |              |                | RI   | - | chr2:241268953-241269295  | NA                       |  | -0.137 | 0.04657411543  |
| HECTD4    | -1.04526215  | 0.003863815683 | A5SS | - | chr12:112264083-112264212 | chr12:112264089-11226421 |  | 0.156  | 0.04804249068  |
| HIVEP2    | 2.651215167  | 2.24E-05       | ES   | - | chr6:142769551-142775125  | NA                       |  | -0.156 | 0.000781848142 |
| HJURP     | 1.609170662  | 1.92E-09       | MXE  | - | chr2:233844204-233844283  | chr2:233849762-233849859 |  | 0.145  | 0.000382262424 |
|           |              |                | MXE  | - | chr2:233845727-233845820  | chr2:233847396-233847461 |  | 0.167  | 0.000982592194 |
| HKR1      | -1.432214895 | 0.001068682443 | ES   | + | chr19:37344609-37344774   | NA                       |  | 0.782  | 7.85E-07       |
|           |              |                | ES   | + | chr19:37346887-37347052   | NA                       |  | 0.712  | 1.03E-06       |
|           |              |                | ES   | + | chr19:37322184-37322232   | NA                       |  | -0.262 | 0.001068047104 |
| HLA-C     | 2.254181172  | 7.31E-07       | MXE  | - | chr6:31270209-31270485    | chr6:31271072-31271331   |  | 0.117  | 5.70E-06       |
| HLA-F     | 3.785726115  | 1.74E-15       | RI   | + | chr6:29726010-29726526    | NA                       |  | 0.379  | 0.000124961378 |
| HLA-L     | 2.063913934  | 8.15E-05       | ES   | + | chr6:30262294-30262342    | NA                       |  | -0.674 | 0.000182498683 |
| HMG20B    | 1.561510133  | 0.000963527543 | MXE  | + | chr19:3575539-3575660     | chr19:3576260-3576307    |  | 0.118  | 0.001067898129 |
| HMGCS1    | 1.801653223  | 0.000539220527 | ES   | - | chr5:43307765-43307824    | NA                       |  | -0.166 | 5.14E-13       |
| HNRNPA2B1 | -1.125577478 | 0.000740757125 | ES   | - | chr7:26190992-26191128    | NA                       |  | -0.402 | 0              |
| HSD11B1L  | -1.169662346 | 0.04341275038  | MXE  | + | chr19:5684818-5684905     | chr19:5684964-5685119    |  | -0.557 | 0.007513422672 |
|           |              |                | MXE  | + | chr19:5684818-5684905     | chr19:5684964-5685119    |  | -0.541 | 0.01372157933  |
| HYI       | 4.717152425  | 4.55E-29       | ES   | - | chr1:43452902-43453004    | NA                       |  | -0.24  | 0.02445759739  |
| HYKK      | 2.240949091  | 0.01387365106  | ES   | + | chr15:78513083-78513425   | NA                       |  | -0.122 | 0.01097352416  |
| ICA1      | 1.844884327  | 0.001320099891 | ES   | - | chr7:8138984-8139047      | NA                       |  | -0.216 | 5.39E-06       |
| IFI27L1   | -2.498331197 | 3.69E-07       | ES   | + | chr14:94097494-94097678   | NA                       |  | 0.265  | 0.006289332786 |
|           |              |                | ES   | + | chr14:94097491-94097678   | NA                       |  | 0.249  | 0.007405164285 |
|           |              |                | MXE  | + | chr14:94100738-94100771   | chr14:94101813-94102059  |  | -0.137 | 0.02602007324  |
| IFRD1     | -1.452438355 | 5.21E-05       | MXE  | + | chr7:112450507-112450782  | chr7:112455762-112455867 |  | 0.193  | 0.000362523698 |
| IFT88     | -1.256084782 | 0.001525613517 | MXE  | + | chr13:20625749-20625849   | chr13:20631015-20631102  |  | 0.315  | 2.93E-06       |
|           |              |                | ES   | + | chr13:20663262-20663386   | NA                       |  | -0.116 | 2.64E-05       |
|           |              |                | ES   | + | chr13:20615792-20615879   | NA                       |  | -0.231 | 0.000290026541 |
|           |              |                | ES   | + | chr13:20631015-20631102   | NA                       |  | -0.152 | 0.002607315509 |
|           |              |                | ES   | + | chr13:20589810-20589867   | NA                       |  | -0.139 | 0.02953166679  |
| IGSF8     | 1.164869832  | 0.03614910135  | A3SS | - | chr1:160091339-160091631  | chr1:160091339-160091608 |  | 0.108  | 0.01220499947  |
| IMPA2     | 1.554706474  | 0.000466620719 | A5SS | + | chr18:12012169-12012349   | chr18:12012169-12012215  |  | -0.136 | 0.02239688901  |
| ING4      | -1.682920315 | 0.001655799854 | ES   | - | chr12:6655637-6655913     | NA                       |  | 0.405  | 0.001631986303 |
|           |              |                | RI   | - | chr12:6652270-6652770     | NA                       |  | 0.184  | 0.001649350636 |
|           |              |                | RI   | - | chr12:6652661-6653050     | NA                       |  | 0.142  | 0.004201701249 |
| INIP      | -1.00002656  | 0.002136516719 | ES   | - | chr9:112701787-112701880  | NA                       |  | 0.115  | 0.000135175814 |
|           |              |                | ES   | - | chr9:112689526-112689617  | NA                       |  | -0.193 | 0.000853548371 |
| INO80C    | 2.350599073  | 7.35E-10       | A3SS | - | chr18:35487385-35487823   | chr18:35487385-35487439  |  | 0.679  | 3.18E-10       |
| INTS3     | 1.059356499  | 0.000222119608 | ES   | + | chr1:153761019-153761109  | NA                       |  | 0.275  | 0              |
|           |              |                | ES   | + | chr1:153753700-153753818  | NA                       |  | -0.218 | 0.01176581464  |
| INTS4     | 1.03261393   | 0.000588957399 | ES   | - | chr11:77910969-77911152   | NA                       |  | 0.154  | 0.000923038976 |

|           |              |                |      |   |                           |                          |        |                |
|-----------|--------------|----------------|------|---|---------------------------|--------------------------|--------|----------------|
| IQCK      | -1.413293854 | 0.002214891262 | MXE  | + | chr16:19735352-19735450   | chr16:19788837-19788922  | -0.216 | 0.04786024144  |
| ISG20     | 3.006849006  | 0.001931643352 | A3SS | + | chr15:88650234-88652310   | chr15:88652169-88652310  | -0.128 | 0.004538961798 |
|           |              |                | A3SS | + | chr15:88650234-88652310   | chr15:88652109-88652310  | -0.225 | 0.0436367351   |
| ISYNA1    | 1.59172281   | 0.01311051218  | MXE  | - | chr19:18436972-18437105   | chr19:18437598-18437760  | -0.472 | 3.96E-05       |
|           |              |                | ES   | - | chr19:18437598-18437760   | NA                       | -0.257 | 0.01175358981  |
| ITPRIPL1  | -1.43474733  | 0.000239711901 | ES   | + | chr2:96325746-96325849    | NA                       | 0.45   | 4.21E-05       |
| JAM2      | -3.00487969  | 0.01743735981  | ES   | + | chr21:25711366-25711568   | NA                       | 0.238  | 0              |
| JMJD1C    | -1.082624334 | 0.006579413059 | ES   | - | chr10:63215552-63215617   | NA                       | -0.149 | 0.000182600247 |
|           |              |                | ES   | - | chr10:63215552-63215696   | NA                       | -0.103 | 0.000344036754 |
| KANK1     | -3.055429556 | 6.04E-06       | A3SS | + | chr9:732377-734835        | chr9:734747-734835       | 0.169  | 0.000542092763 |
| KANK2     | -1.675140318 | 0.002861384131 | ES   | - | chr19:11196049-11196227   | NA                       | 0.329  | 0.00167889463  |
| KANSL2    | -1.278645852 | 9.00E-06       | RI   | - | chr12:48681381-48682225   | NA                       | -0.201 | 4.32E-05       |
|           |              |                | ES   | - | chr12:48679035-48679150   | NA                       | 0.132  | 0.000684907752 |
|           |              |                | ES   | - | chr12:48679035-48679238   | NA                       | 0.226  | 0.005663637832 |
| KATNAL1   | 3.923730963  | 2.47E-29       | ES   | - | chr13:30255446-30255615   | NA                       | 0.107  | 0.000264591864 |
| KATNAL2   | -3.382314823 | 1.36E-07       | ES   | + | chr18:47046390-47046527   | NA                       | 0.121  | 0.01677792067  |
| KCNAB3    | -3.517345913 | 6.77E-08       | RI   | - | chr17:7923967-7924265     | NA                       | -0.341 | 0.002842735607 |
|           |              |                | ES   | - | chr17:7925096-7925183     | NA                       | 0.145  | 0.003016887814 |
| KIAA1429  | 1.24880511   | 0.000462955549 | MXE  | - | chr8:94530962-94531085    | chr8:94534838-94535007   | 0.112  | 0.02615574639  |
| KIAA1551  | 1.587805706  | 0.000226575924 | ES   | + | chr12:31987238-31987322   | NA                       | -0.143 | 0.000575324216 |
|           |              |                | ES   | + | chr12:31970188-31970356   | NA                       | -0.106 | 0.002983483307 |
|           |              |                | MXE  | + | chr12:31960776-31960871   | chr12:31980877-31985957  | 0.111  | 0.01001908489  |
| KIF21A    | -1.865969966 | 0.00651053706  | ES   | - | chr12:39330241-39330262   | NA                       | -0.766 | 0              |
|           |              |                | A5SS | - | chr12:39321347-39322882   | chr12:39322667-39322882  | -0.441 | 0              |
|           |              |                | ES   | - | chr12:39318072-39318201   | NA                       | 0.303  | 2.13E-08       |
|           |              |                | ES   | - | chr12:39318072-39318201   | NA                       | 0.269  | 2.19E-06       |
|           |              |                | MXE  | - | chr12:39315931-39315970   | chr12:39318072-39318201  | 0.172  | 2.61E-06       |
|           |              |                | ES   | - | chr12:39315931-39315970   | NA                       | -0.222 | 7.86E-05       |
|           |              |                | MXE  | - | chr12:39311414-39311553   | chr12:39319905-39320013  | -0.432 | 0.002295330497 |
| KIF2A     | -1.442609524 | 0.002363777415 | A5SS | + | chr5:62352587-62352710    | chr5:62352587-62352653   | 0.164  | 0.004282582856 |
| KLC1      | -1.135311744 | 0.01962575376  | A5SS | + | chr14:103679383-103679545 | chr14:103679383-10367951 | -0.222 | 0.002423306488 |
|           |              |                | ES   | + | chr14:103692358-103692425 | NA                       | -0.228 | 0.003905473379 |
|           |              |                | ES   | + | chr14:103684985-103685036 | NA                       | 0.248  | 0.01272844939  |
|           |              |                | A5SS | + | chr14:103679383-103679545 | chr14:103679383-10367951 | -0.171 | 0.02000464033  |
| KLHDC1    | -1.635443325 | 0.0484250351   | MXE  | + | chr14:49725685-49725769   | chr14:49728925-49729009  | 0.409  | 0.001455592303 |
|           |              |                | ES   | + | chr14:49728925-49729009   | NA                       | -0.363 | 0.04492330258  |
| KLHL24    | -1.345531734 | 0.009388624109 | ES   | + | chr3:183636220-183636311  | NA                       | -0.354 | 7.54E-08       |
|           |              |                | ES   | + | chr3:183636220-183636311  | NA                       | -0.322 | 0.000150335610 |
| KLHL7     | -1.719891504 | 4.28E-06       | ES   | + | chr7:23117833-23117964    | NA                       | 0.334  | 0.002563569625 |
| KMT2C     | -1.997615406 | 1.89E-07       | A3SS | - | chr7:152156204-152156346  | chr7:152156204-152156274 | 0.104  | 0.001747876875 |
| KMT2E     | -1.203849336 | 0.004965091321 | ES   | + | chr7:105110476-105110602  | NA                       | 0.199  | 3.54E-09       |
| KRIT1     | -1.068110366 | 0.003123809116 | RI   | - | chr7:92235402-92236542    | NA                       | -0.14  | 9.18E-06       |
|           |              |                | ES   | - | chr7:92244001-92244149    | NA                       | 0.288  | 1.62E-05       |
|           |              |                | MXE  | - | chr7:92235402-92236542    | chr7:92237666-92237759   | 0.128  | 0.006841950359 |
| KRTCAP2   | 1.029343212  | 0.01280530371  | MXE  | - | chr1:155169790-155169857  | chr1:155172564-155172892 | 0.12   | 6.32E-05       |
| L3HYPDH   | -1.752081738 | 0.009658583907 | ES   | - | chr14:59474438-59474526   | NA                       | 0.268  | 0.006032195647 |
|           |              |                | ES   | - | chr14:59474438-59474526   | NA                       | 0.206  | 0.01072927059  |
| L3MBTL3   | 1.434549104  | 0.006471405453 | ES   | + | chr6:130049650-130049830  | NA                       | 0.114  | 0.03879465813  |
| LAS1L     | 1.782298979  | 3.15E-05       | A5SS | - | chrX:65520701-65523707    | chrX:65523559-65523707   | -0.247 | 0              |
|           |              |                | MXE  | - | chrX:65524055-65524262    | chrX:65524563-65524614   | -0.225 | 3.21E-08       |
|           |              |                | ES   | - | chrX:65528259-65528369    | NA                       | 0.125  | 2.61E-07       |
|           |              |                | ES   | - | chrX:65524563-65524614    | NA                       | -0.365 | 2.58E-06       |
| LCA5L     | -1.622065567 | 0.02252697764  | ES   | - | chr21:39427758-39427905   | NA                       | 0.462  | 0.001839490346 |
|           |              |                | ES   | - | chr21:39428171-39428503   | NA                       | 0.499  | 0.0264779633   |
| LDLR      | 1.241552419  | 0.01911814173  | MXE  | + | chr19:11123173-11123344   | chr19:11128007-11128085  | 0.134  | 0.008448894889 |
| LETM2     | 1.639964307  | 0.006151047724 | ES   | + | chr8:38406945-38407038    | NA                       | -0.437 | 1.41E-06       |
| LIG4      | -1.759531589 | 0.000706942462 | ES   | - | chr13:108214537-108214807 | NA                       | 0.237  | 7.32E-05       |
|           |              |                | ES   | - | chr13:108214537-108214610 | NA                       | 0.167  | 0.000500771164 |
| LINC00910 | 4.052061325  | 4.78E-14       | ES   | - | chr17:43387935-43388057   | NA                       | 0.294  | 2.51E-05       |
| LINC01001 | 2.271547507  | 0.006862132394 | ES   | - | chr11:134563-134796       | NA                       | 0.533  | 0.01082847443  |

|           |              |                |      |   |                          |                          |        |                |
|-----------|--------------|----------------|------|---|--------------------------|--------------------------|--------|----------------|
| LINC01021 | 1.95564405   | 0.0116975285   | ES   | + | chr5:27477638-27477801   | NA                       | -0.121 | 0.03820251916  |
| LINC01778 | -2.722293474 | 0.006404109579 | MXE  | + | chr1:30826554-30826652   | chr1:30829747-30829882   | -0.203 | 0.04357236015  |
| LINC02210 | 1.019602373  | 0.03303933055  | ES   | + | chr17:45640388-45640455  | NA                       | 0.754  | 3.26E-07       |
| LMAN2L    | -1.398350486 | 0.004470000054 | ES   | - | chr2:96737136-96737217   | NA                       | 0.169  | 1.72E-06       |
| LMNA      | 1.117541231  | 0.0454063878   | RI   | + | chr1:156137653-156138757 | NA                       | -0.152 | 0.001867343234 |
| LPCAT4    | 1.318391558  | 0.000325661230 | ES   | - | chr15:34361399-34361532  | NA                       | 0.164  | 0.000190521206 |
| LPIN1     | 2.365586945  | 3.53E-09       | ES   | + | chr2:11776085-11776193   | NA                       | 0.162  | 0.000381103110 |
| LRP2BP    | -1.857891393 | 0.03534109477  | ES   | - | chr4:185378080-185378207 | NA                       | 0.311  | 0.01178140079  |
| LRRC37B   | -1.151313638 | 0.006355494958 | ES   | + | chr17:32045699-32045818  | NA                       | 0.181  | 0.000129012653 |
| LRRC75B   | -2.286462868 | 0.002054883078 | ES   | - | chr22:24588678-24589265  | NA                       | -0.438 | 0.000475420331 |
|           |              |                | A3SS | - | chr22:24588213-24589393  | chr22:24588213-24588329  | -0.394 | 0.000962875699 |
| LRRFIP1   | 1.871229807  | 5.98E-05       | ES   | + | chr2:237751199-237751271 | NA                       | -0.265 | 0              |
| LRRK2     | -3.487581527 | 2.69E-15       | ES   | + | chr12:40313971-40314173  | NA                       | 0.211  | 0.000176395956 |
| LTBP4     | 1.425418433  | 0.0250517973   | ES   | + | chr19:40622949-40623021  | NA                       | -0.229 | 4.13E-11       |
|           |              |                | ES   | + | chr19:40622949-40623021  | NA                       | -0.236 | 1.52E-05       |
|           |              |                | ES   | + | chr19:40617099-40617225  | NA                       | 0.159  | 0.005927429303 |
|           |              |                | ES   | + | chr19:40616888-40617042  | NA                       | 0.21   | 0.03749535962  |
| LUC7L2    | -1.977428472 | 2.21E-11       | ES   | + | chr7:139375508-139375583 | NA                       | -0.459 | 0.003536476151 |
| MAGED2    | -1.077604338 | 0.04959084528  | RI   | + | chrX:54815247-54816007   | NA                       | 0.171  | 3.60E-08       |
| MAGI1     | -1.938859083 | 0.002418317121 | ES   | - | chr3:65387142-65387226   | NA                       | -0.5   | 4.47E-07       |
| MAP4K4    | -1.042399508 | 0.01087233698  | MXE  | + | chr2:101860824-101860986 | chr2:101863820-101864051 | 0.393  | 0              |
|           |              |                | ES   | + | chr2:101868028-101868037 | NA                       | -0.441 | 0              |
|           |              |                | ES   | + | chr2:101860824-101860986 | NA                       | 0.35   | 1.98E-11       |
|           |              |                | ES   | + | chr2:101863820-101864051 | NA                       | -0.319 | 2.64E-09       |
|           |              |                | ES   | + | chr2:101871493-101871685 | NA                       | 0.161  | 7.79E-08       |
|           |              |                | A5SS | + | chr2:101887087-101887261 | chr2:101887087-101887237 | -0.102 | 2.13E-07       |
|           |              |                | ES   | + | chr2:101860824-101860986 | NA                       | 0.384  | 6.13E-05       |
| MAP7D1    | -1.084772101 | 0.01396760647  | ES   | + | chr1:36174897-36175008   | NA                       | -0.155 | 0.001511022672 |
| MAPT      | -1.08660315  | 0.004757739311 | MXE  | + | chr17:45971858-45971945  | chr17:45978374-45978440  | 0.149  | 0.000529692575 |
|           |              |                | ES   | + | chr17:45971858-45971945  | NA                       | 0.225  | 0.001677676425 |
| MBD1      | -1.128847187 | 0.009399627428 | ES   | - | chr18:50271468-50271540  | NA                       | -0.415 | 0.000907332278 |
|           |              |                | ES   | - | chr18:50273333-50273471  | NA                       | 0.124  | 0.009485303594 |
|           |              |                | ES   | - | chr18:50273333-50273426  | NA                       | 0.161  | 0.01539580262  |
| MBTD1     | -1.252823664 | 0.000571616756 | ES   | - | chr17:51202021-51202077  | NA                       | -0.178 | 0.008345359488 |
|           |              |                | ES   | - | chr17:51193427-51193510  | NA                       | -0.119 | 0.01245768692  |
| MCOLN3    | 3.478039877  | 0.006921858627 | ES   | - | chr1:85036709-85036868   | NA                       | 0.648  | 3.05E-06       |
| MCRIP2    | 1.157305055  | 0.03284819752  | ES   | + | chr16:646471-646608      | NA                       | -0.358 | 0.003349315801 |
| MEIS3     | -1.979511956 | 0.02331342304  | ES   | - | chr19:47415050-47415101  | NA                       | 0.259  | 0.02092964191  |
| MELTF     | 3.497884867  | 1.83E-12       | MXE  | - | chr3:197021403-197021471 | chr3:197022956-197023113 | -0.268 | 0.02020366208  |
| METTL2B   | -1.168119304 | 6.18E-05       | ES   | + | chr7:128477081-128477173 | NA                       | 0.255  | 4.97E-11       |
| METTL4    | 1.536763995  | 1.67E-05       | ES   | - | chr18:2544652-2544759    | NA                       | -0.245 | 4.20E-07       |
|           |              |                | ES   | - | chr18:2544194-2544286    | NA                       | -0.201 | 1.41E-06       |
|           |              |                | ES   | - | chr18:2547354-2547529    | NA                       | 0.114  | 0.01235782639  |
| MFSD10    | 1.631706667  | 0.01571849455  | RI   | - | chr4:2931374-2931936     | NA                       | 0.328  | 5.32E-07       |
|           |              |                | ES   | - | chr4:2931554-2931663     | NA                       | 0.108  | 0.000747529734 |
| MGAT5     | -1.713395288 | 0.003319575422 | ES   | + | chr2:134253094-134253218 | NA                       | 0.373  | 0.01190796755  |
| MGRN1     | -1.610982278 | 0.002998999055 | A3SS | + | chr16:4686258-4690974    | chr16:4688795-4690974    | -0.593 | 3.75E-10       |
|           |              |                | ES   | + | chr16:4686258-4686303    | NA                       | -0.582 | 1.44E-07       |
| MICAL2    | 3.586544564  | 1.11E-12       | ES   | + | chr11:12249183-12249246  | NA                       | 0.136  | 0.02165860992  |
| MIIP      | 1.563275249  | 0.004499888838 | RI   | + | chr1:12029222-12030124   | NA                       | -0.328 | 0.008465546508 |
| MINDY3    | -1.208613357 | 0.007328234251 | ES   | - | chr10:15838227-15838279  | NA                       | -0.52  | 2.85E-13       |
|           |              |                | ES   | - | chr10:15816834-15816915  | NA                       | 0.114  | 0.03671992905  |
| MIR99AHG  | -3.934916524 | 1.08E-11       | ES   | + | chr21:16537378-16537439  | NA                       | 0.119  | 0.003127023316 |
| MLF1      | 1.891544441  | 0.003629853842 | ES   | + | chr3:158588851-158588924 | NA                       | -0.118 | 8.38E-08       |
|           |              |                | ES   | + | chr3:158588851-158588924 | NA                       | -0.16  | 3.81E-05       |
| MRM2      | -1.239198402 | 0.002862619913 | ES   | - | chr7:2238014-2238937     | NA                       | -0.164 | 0.008753276415 |
| MROH8     | -1.737143816 | 0.01520324938  | ES   | - | chr20:37155062-37155167  | NA                       | 0.609  | 0.001277328111 |
| MSI2      | -2.047638975 | 1.02E-09       | A3SS | + | chr17:57674917-57675126  | chr17:57674971-57675126  | -0.372 | 0.009154824571 |
| MSRA      | -2.529747678 | 2.81E-05       | MXE  | + | chr8:10207832-10207901   | chr8:10245103-10245223   | -0.15  | 2.77E-06       |
|           |              |                | MXE  | + | chr8:10207832-10207901   | chr8:10245103-10245223   | -0.14  | 5.58E-06       |

|           |              |                |      |   |                          |                          |        |                |
|-----------|--------------|----------------|------|---|--------------------------|--------------------------|--------|----------------|
| MSRB3     | 2.358771729  | 6.61E-06       | MXE  | + | chr12:65308528-65308655  | chr12:65326825-65326934  | 0.241  | 0.0416374328   |
| MTMR11    | 3.003439045  | 8.69E-14       | RI   | - | chr1:149930364-149930965 | NA                       | -0.421 | 0.000164408632 |
|           |              |                | ES   | - | chr1:149931259-149931426 | NA                       | -0.184 | 0.0223742272   |
| MTMR9LP   | -2.237656843 | 0.001420092965 | ES   | - | chr1:32234035-32234301   | NA                       | 0.18   | 0.04339536956  |
| MTSS1L    | -1.986879617 | 0.000287594815 | ES   | - | chr16:70665465-70665540  | NA                       | -0.25  | 0.001167925376 |
| MTTP      | -5.89335954  | 4.46E-09       | ES   | + | chr4:99574808-99574970   | NA                       | -0.745 | 3.17E-09       |
| MTX1      | 1.439471995  | 0.000275591300 | ES   | + | chr1:155212126-155212219 | NA                       | -0.196 | 0              |
|           |              |                | A5SS | + | chr1:155210547-155212219 | chr1:155210547-155210627 | -0.6   | 0              |
|           |              |                | RI   | + | chr1:155210547-155212219 | NA                       | -0.118 | 0.000173568272 |
| MUTYH     | -1.087860648 | 0.007820749729 | ES   | - | chr1:45332917-45332959   | NA                       | 0.303  | 0.01134847022  |
|           |              |                | RI   | - | chr1:45332762-45333324   | NA                       | 0.151  | 0.01473339108  |
|           |              |                | A5SS | - | chr1:45332917-45333324   | chr1:45333284-45333324   | 0.149  | 0.03557564081  |
| MVD       | 1.930819022  | 0.001183642154 | ES   | - | chr16:88657145-88657247  | NA                       | -0.523 | 0.000142670014 |
|           |              |                | A3SS | - | chr16:88656104-88656561  | chr16:88656104-88656304  | -0.376 | 0.01930354929  |
| MYCBP2    | -1.320982412 | 0.0258168125   | ES   | - | chr13:77103208-77103310  | NA                       | -0.138 | 0.007740262278 |
| MYEF2     | -2.082989992 | 1.84E-06       | ES   | - | chr15:48151099-48151171  | NA                       | 0.243  | 2.46E-08       |
|           |              |                | MXE  | - | chr15:48151472-48151571  | chr15:48151873-48151942  | 0.163  | 0.001055792768 |
| MYLK      | 1.500267615  | 0.02198623706  | ES   | - | chr3:123732895-123733102 | NA                       | -0.244 | 0.000111282462 |
| MYO15B    | 2.216823759  | 0.002319364735 | RI   | + | chr17:75590906-75591246  | NA                       | -0.606 | 0.000440194364 |
| MYO18A    | -1.18297083  | 0.006777988076 | ES   | - | chr17:29085603-29085648  | NA                       | -0.652 | 0              |
| MYO5A     | -1.8759313   | 0.0457881529   | ES   | - | chr15:52337809-52337884  | NA                       | -0.362 | 0              |
| N4BP2     | -1.350727574 | 0.003290573016 | MXE  | + | chr4:40097226-40097569   | chr4:40100035-40100126   | 0.26   | 0.01590946898  |
|           |              |                | ES   | + | chr4:40100035-40100126   | NA                       | -0.335 | 0.03898426062  |
| N6AMT1    | -1.464241785 | 6.41E-05       | RI   | - | chr21:28872190-28876491  | NA                       | -0.205 | 0.01873364361  |
| NAA16     | -1.696138497 | 6.02E-08       | ES   | + | chr13:41336649-41336756  | NA                       | 0.191  | 0.000130332972 |
|           |              |                | ES   | + | chr13:41336649-41336756  | NA                       | 0.165  | 0.005376307953 |
|           |              |                | ES   | + | chr13:41355143-41355216  | NA                       | 0.106  | 0.009473724616 |
| NAA60     | -1.877030786 | 2.83E-05       | A5SS | + | chr16:3484698-3485083    | chr16:3484698-3485061    | -0.189 | 0.000245554480 |
| NAGLU     | -1.421840041 | 0.0197509011   | ES   | + | chr17:42537397-42537545  | NA                       | -0.267 | 0.002270954097 |
| NAGS      | 4.321507059  | 4.13E-10       | RI   | + | chr17:44006528-44007494  | NA                       | -0.583 | 2.47E-09       |
| NAP1L1    | 1.336960592  | 0.000189389238 | ES   | - | chr12:76074202-76074239  | NA                       | -0.129 | 1.61E-08       |
| NAPEPLD   | -2.582972854 | 0.000551482601 | RI   | - | chr7:103099775-103103554 | NA                       | -0.376 | 0.002761239845 |
| NARFL     | 1.394658197  | 0.000522081231 | ES   | - | chr16:740021-740103      | NA                       | 0.156  | 6.49E-08       |
| NASP      | -1.200291752 | 0.002166809433 | ES   | + | chr1:45607320-45608337   | NA                       | -0.258 | 0.01542938513  |
|           |              |                | MXE  | + | chr1:45594693-45594773   | chr1:45600384-45600457   | 0.277  | 0.03478906968  |
| NBPF26    | 2.644124877  | 8.36E-08       | MXE  | + | chr1:120834494-120834546 | chr1:120836516-120836568 | 0.438  | 0.03649123668  |
| NBPF8     | 2.38466      | 8.48E-09       | MXE  | + | chr1:120447093-120447166 | chr1:120447629-120447841 | 0.575  | 1.47E-06       |
|           |              |                | ES   | + | chr1:120447093-120447166 | NA                       | 0.448  | 4.38E-05       |
| NDE1      | -1.00806691  | 0.04055652833  | MXE  | + | chr16:15687374-15687511  | chr16:15691143-15691323  | -0.145 | 9.27E-05       |
|           |              |                | MXE  | + | chr16:15651468-15651584  | chr16:15651930-15652050  | -0.124 | 0.03549421484  |
| NDUFB2    | -1.281500233 | 0.001782880306 | ES   | + | chr7:140700869-140700959 | NA                       | 0.623  | 7.31E-06       |
|           |              |                | ES   | + | chr7:140700869-140700959 | NA                       | 0.561  | 1.31E-05       |
| NDUFC1    | 1.149202519  | 0.00308601753  | ES   | - | chr4:139297384-139297443 | NA                       | -0.122 | 0.02506932821  |
| NDUFS8    | 1.679540398  | 0.006992665117 | ES   | + | chr11:68035627-68035788  | NA                       | -0.114 | 1.32E-06       |
| NEK8      | 1.273202264  | 0.008633506123 | RI   | + | chr17:28737305-28737736  | NA                       | -0.113 | 0.0180385365   |
| NEO1      | -1.368746629 | 0.0110537643   | ES   | + | chr15:73293389-73293548  | NA                       | 0.392  | 1.17E-08       |
|           |              |                | A3SS | + | chr15:73270009-73270233  | chr15:73270057-73270233  | -0.215 | 0.000102151128 |
| NEXN      | 3.064731182  | 7.17E-13       | ES   | + | chr1:77925187-77925229   | NA                       | -0.687 | 4.41E-07       |
| NF2       | -1.93103303  | 4.81E-12       | MXE  | + | chr22:29668332-29668446  | chr22:29673268-29673486  | -0.623 | 0              |
| NFE2L1    | -1.284855613 | 0.02143014669  | ES   | + | chr17:48057031-48057121  | NA                       | 0.245  | 1.71E-08       |
| NHLRC3    | -1.972023136 | 6.78E-05       | ES   | + | chr13:39042104-39042305  | NA                       | -0.36  | 5.79E-08       |
| NHSL1     | -1.657548669 | 3.47E-05       | ES   | - | chr6:138441982-138442114 | NA                       | 0.476  | 0.007436656522 |
| NID2      | -10.74102599 | 8.89E-21       | RI   | - | chr14:52005736-52006660  | NA                       | 0.884  | 1.29E-06       |
| NKIRAS2   | -1.596413971 | 0.000162448297 | RI   | + | chr17:42022398-42022640  | NA                       | -0.163 | 5.64E-05       |
| NMNAT3    | 2.730653499  | 0.000166470975 | ES   | - | chr3:139637962-139638062 | NA                       | -0.251 | 0.0425199426   |
| NOVA1-AS1 | 2.538877294  | 6.37E-07       | ES   | + | chr14:26797913-26798030  | NA                       | -0.122 | 0.01371870462  |
| NPR2      | -3.536623637 | 1.98E-08       | RI   | + | chr9:35808508-35808853   | NA                       | 0.544  | 0.001284150908 |
| NR2F1-AS1 | -2.868865851 | 2.32E-06       | ES   | - | chr5:93438702-93438741   | NA                       | 0.288  | 0.004687272022 |
| NRBP2     | -1.153527038 | 0.04855267055  | RI   | - | chr8:143839508-143840030 | NA                       | 0.219  | 1.41E-12       |
| NRM       | -1.41478861  | 0.01307985467  | ES   | - | chr6:30689275-30689452   | NA                       | -0.259 | 8.50E-12       |

|         |              |                |      |   |                           |                          |        |                |
|---------|--------------|----------------|------|---|---------------------------|--------------------------|--------|----------------|
|         |              |                | A5SS | - | chr6:30690024-30690243    | chr6:30690046-30690243   | -0.66  | 7.95E-05       |
| NSUN5P1 | -2.567205263 | 9.04E-09       | ES   | + | chr7:75411654-75411759    | NA                       | -0.317 | 0.003212828364 |
|         |              |                | ES   | + | chr7:75410605-75410726    | NA                       | -0.256 | 0.005608000496 |
|         |              |                | A5SS | + | chr7:75415591-75415778    | chr7:75415591-75415770   | 0.186  | 0.02639140838  |
| NT5C3A  | -3.028047386 | 7.01E-10       | ES   | - | chr7:33035933-33035988    | NA                       | -0.264 | 0.008891469354 |
|         |              |                | MXE  | - | chr7:33024038-33024108    | chr7:33026816-33026915   | 0.177  | 0.04140530147  |
| NUDT17  | 1.179491928  | 0.004580350482 | RI   | + | chr1:145846432-145846690  | NA                       | -0.388 | 0.000299396112 |
|         |              |                | MXE  | + | chr1:145846012-145846196  | chr1:145846597-145846690 | 0.18   | 0.004181133627 |
| NUDT2   | 2.454110123  | 6.04E-10       | ES   | + | chr9:34336228-34336341    | NA                       | -0.193 | 0              |
| NUDT22  | 1.845685503  | 1.64E-05       | ES   | + | chr11:64227567-64227666   | NA                       | -0.367 | 3.01E-09       |
|         |              |                | ES   | + | chr11:64229849-64230070   | NA                       | 0.145  | 0.000222018372 |
| NUDT8   | 3.004048672  | 1.91E-06       | RI   | - | chr11:67628918-67629921   | NA                       | -0.504 | 0.000634117199 |
| NVL     | 1.127588771  | 0.000904930389 | MXE  | - | chr1:224232088-224232182  | chr1:224232894-224232972 | 0.615  | 0.000384726908 |
| OBSL1   | -1.403701046 | 0.01240023565  | RI   | - | chr2:219550728-219551798  | NA                       | 0.388  | 0.03714903893  |
| OGDH    | -1.526948973 | 0.000370643214 | MXE  | + | chr7:44647443-44647534    | chr7:44647656-44647759   | 0.358  | 0              |
|         |              |                | MXE  | + | chr7:44647443-44647534    | chr7:44647656-44647759   | 0.363  | 0              |
|         |              |                | MXE  | + | chr7:44645326-44645518    | chr7:44647656-44647759   | 0.168  | 0.002859687472 |
| OPTN    | 1.759683322  | 0.000184078235 | A3SS | + | chr10:13109096-13109288   | chr10:13109111-13109288  | -0.305 | 0.02544833074  |
| ORMDL1  | -1.110626883 | 0.001455323896 | ES   | - | chr2:189783013-189783123  | NA                       | -0.422 | 0              |
|         |              |                | RI   | - | chr2:189782421-189783123  | NA                       | -0.168 | 0.002200528562 |
| PACS2   | -1.114402437 | 0.03768606891  | RI   | + | chr14:105383358-105384463 | NA                       | -0.184 | 1.17E-07       |
| PAK4    | 1.497362863  | 0.0117030675   | ES   | + | chr19:39168229-39168312   | NA                       | -0.166 | 0.000241931653 |
|         |              |                | ES   | + | chr19:39168229-39168302   | NA                       | -0.16  | 0.000290026541 |
| PANK4   | 1.300454609  | 0.002768792228 | A3SS | - | chr1:2510677-2510782      | chr1:2510677-2510748     | 0.32   | 0.004748089327 |
| PAQR6   | -2.277732777 | 5.05E-06       | ES   | - | chr1:156247509-156247632  | NA                       | 0.619  | 4.35E-07       |
| PARD3   | 1.788626557  | 9.72E-09       | ES   | - | chr10:34336198-34336243   | NA                       | 0.427  | 1.53E-12       |
|         |              |                | ES   | - | chr10:34372497-34372536   | NA                       | -0.263 | 8.40E-06       |
| PATJ    | 2.919373071  | 1.43E-08       | ES   | + | chr1:62100318-62100408    | NA                       | -0.5   | 0.01919460471  |
| PBRM1   | -1.352841199 | 0.002059250533 | A3SS | - | chr3:52679573-52679726    | chr3:52679573-52679723   | 0.207  | 0.0011645449   |
|         |              |                | ES   | - | chr3:52554723-52554879    | NA                       | 0.487  | 0.002131254622 |
|         |              |                | A3SS | - | chr3:52587352-52587510    | chr3:52587352-52587435   | 0.106  | 0.007750127607 |
|         |              |                | ES   | - | chr3:52554723-52554879    | NA                       | 0.286  | 0.008665320904 |
| PCDHGC3 | -8.35313208  | 1.06E-34       | ES   | + | chr5:141478393-141478546  | NA                       | 0.206  | 0.007191723509 |
| PCGF3   | -1.337546151 | 0.000276849824 | ES   | + | chr4:732399-732498        | NA                       | -0.258 | 0.03122303962  |
|         |              |                | ES   | + | chr4:732443-732498        | NA                       | -0.204 | 0.04316493501  |
| PCNX2   | 2.539563468  | 0.006367894852 | RI   | - | chr1:232984135-232986540  | NA                       | -0.155 | 0.006928555429 |
|         |              |                | ES   | - | chr1:233160282-233160433  | NA                       | -0.131 | 0.01676038414  |
| PDGFRA  | -7.789961156 | 3.32E-21       | MXE  | + | chr4:54258756-54258817    | chr4:54261094-54261412   | -0.168 | 0.000306191906 |
| PDLIM5  | -1.044069279 | 0.03484552108  | ES   | + | chr4:94584985-94585003    | NA                       | -0.172 | 2.58E-07       |
|         |              |                | A3SS | + | chr4:94575615-94576034    | chr4:94575942-94576034   | 0.428  | 1.38E-06       |
| PER3    | -1.903743332 | 0.004294537408 | RI   | + | chr1:7829836-7830161      | NA                       | 0.148  | 0.000143573687 |
|         |              |                | ES   | + | chr1:7787197-7787246      | NA                       | -0.168 | 0.00357297092  |
|         |              |                | ES   | + | chr1:7787197-7787246      | NA                       | -0.575 | 0.003807338828 |
| PEX2    | 1.294604673  | 0.004559218413 | ES   | - | chr8:76988306-76988338    | NA                       | 0.111  | 3.97E-08       |
| PEX3    | 1.101002375  | 0.03515749002  | ES   | + | chr6:143472159-143472328  | NA                       | -0.146 | 1.34E-05       |
| PFAS    | 1.077632119  | 0.02410976757  | A3SS | + | chr17:8266500-8266898     | chr17:8266752-8266898    | 0.201  | 0.009613703767 |
| PGAP1   | -3.788491919 | 2.33E-11       | ES   | - | chr2:196892345-196892401  | NA                       | -0.204 | 0.02951502951  |
| PGGHG   | 1.615200075  | 0.008488698839 | RI   | + | chr11:290677-292095       | NA                       | 0.381  | 3.71E-07       |
|         |              |                | A3SS | + | chr11:290657-291113       | chr11:290677-291113      | 0.517  | 2.86E-06       |
| PHF7    | 1.178655745  | 0.01077870112  | RI   | + | chr3:52421647-52422881    | NA                       | -0.515 | 0.000497736380 |
|         |              |                | MXE  | + | chr3:52422221-52422338    | chr3:52422759-52422881   | 0.14   | 0.00222168987  |
| PHTF2   | -2.110360977 | 1.56E-07       | ES   | + | chr7:77937709-77937838    | NA                       | 0.121  | 1.21E-07       |
| PKIG    | -3.052054967 | 0.000383770232 | ES   | + | chr20:44582584-44582731   | NA                       | -0.416 | 0              |
|         |              |                | ES   | + | chr20:44585099-44585204   | NA                       | -0.289 | 0.002174269931 |
| PLCB4   | 2.002095885  | 0.000180340697 | ES   | + | chr20:9373046-9373104     | NA                       | 0.482  | 0.000163314841 |
| PLCD4   | -4.835138045 | 0.000112753841 | RI   | + | chr2:218633604-218634221  | NA                       | 0.245  | 8.18E-06       |
| PLEKHA4 | -3.202731542 | 4.50E-10       | MXE  | - | chr19:48839204-48839263   | chr19:48841148-48841310  | 0.396  | 0.01313028342  |
| PLEKHA8 | -1.634648153 | 0.001400125611 | ES   | + | chr7:30050433-30050474    | NA                       | -0.397 | 4.16E-05       |
| PLEKHH2 | -2.333159992 | 2.95E-07       | RI   | + | chr2:43710488-43712383    | NA                       | -0.327 | 0.000589824088 |
| PLGRKT  | 1.75562491   | 7.40E-06       | ES   | - | chr9:5381862-5382031      | NA                       | 0.183  | 0.001850489502 |

|           |              |                          |                        |        |                           |                          |        |                |
|-----------|--------------|--------------------------|------------------------|--------|---------------------------|--------------------------|--------|----------------|
| PLOD2     | -1.094339997 | 0.02385448137            | ES                     | -      | chr3:146077861-146077924  | NA                       | -0.18  | 0.007990153349 |
| PLSCR1    | 1.572589187  | 1.64E-05                 | RI                     | -      | chr3:146521543-146522053  | NA                       | -0.279 | 1.65E-09       |
|           |              |                          | ES                     | -      | chr3:146528613-146528831  | NA                       | 0.271  | 0.000434706440 |
|           |              |                          | ES                     | -      | chr3:146536539-146536565  | NA                       | -0.146 | 0.03266616291  |
| PLXNB1    | -3.31053848  | 2.56E-12                 | RI                     | -      | chr3:48410454-48411036    | NA                       | 0.641  | 0.01297814223  |
| PNPLA6    | 1.908810733  | 0.000496194786           | ES                     | +      | chr19:7541983-7542067     | NA                       | -0.137 | 0.002534240441 |
| POGLUT1   | -1.533434776 | 1.10E-05                 | ES                     | +      | chr3:119478333-119478474  | NA                       | 0.363  | 0.01651821476  |
| POLB      | 1.710448332  | 0.03165134489            | ES                     | +      | chr8:42352518-42352568    | NA                       | -0.146 | 0.000121552777 |
| POLD1     | 1.223461571  | 0.04540326691            | RI                     | +      | chr19:50401998-50402373   | NA                       | -0.509 | 0.003199637451 |
|           |              |                          | RI                     | +      | chr19:50415723-50416528   | NA                       | -0.266 | 0.005472713134 |
| POLDIP3   | -1.1845829   | 0.00411630455            | ES                     | -      | chr22:42601969-42602056   | NA                       | -0.229 | 0.005634242534 |
|           |              |                          | ES                     | -      | chr22:42601969-42602107   | NA                       | -0.263 | 0.007773580358 |
| POLR1C    | 1.532565206  | 0.000636125678           | RI                     | +      | chr6:43519705-43520185    | NA                       | -0.137 | 0.006280059241 |
| POMZP3    | -1.390858878 | 0.02538695052            | RI                     | -      | chr7:76618182-76618615    | NA                       | 0.259  | 0.01055453037  |
|           |              |                          | A3SS                   | -      | chr7:76611453-76611627    | chr7:76611453-76611591   | 0.25   | 0.02937565073  |
| POP4      | 2.558240582  | 3.06E-16                 | MXE                    | +      | chr19:29610408-29610457   | chr19:29611861-29611939  | 0.229  | 0.007333096958 |
| PPFIBP1   | -1.562329375 | 0.002152984153           | ES                     | +      | chr12:27658815-27658848   | NA                       | -0.773 | 0              |
| PPOX      | 1.082271124  | 0.01412079581            | RI                     | +      | chr1:161170906-161171218  | NA                       | 0.241  | 0.003244746418 |
| PPP1R12B  | -1.091803732 | 0.01764074781            | ES                     | +      | chr1:161167370-161167486  | NA                       | -0.156 | 0.04131087203  |
|           |              |                          | ES                     | +      | chr1:202445045-202445228  | NA                       | 0.302  | 0.001936037329 |
|           |              |                          | ES                     | +      | chr1:202501858-202502005  | NA                       | 0.611  | 0.03813114754  |
| PQLC3     | 1.511373337  | 6.02E-06                 | ES                     | +      | chr1:202443086-202443127  | NA                       | 0.25   | 0.03843822808  |
|           |              |                          | ES                     | +      | chr2:11174967-11175009    | NA                       | -0.307 | 6.68E-05       |
|           |              |                          | ES                     | +      | chr2:11174967-11175009    | NA                       | -0.106 | 0.00284845948  |
|           |              |                          | ES                     | +      | chr2:11172750-11172824    | NA                       | -0.284 | 0.005969129601 |
| MXE       | +            | chr2:11164203-11164261   | chr2:11171924-11172045 | -0.19  | 0.0108490355              |                          |        |                |
| PRKAB1    | -1.386382525 | 6.65E-05                 | ES                     | +      | chr12:119671494-119671668 | NA                       | 0.152  | 0.007309215227 |
| PRKRIP1   | -1.683699027 | 0.000656677814           | ES                     | +      | chr7:102395976-102396537  | NA                       | 0.361  | 2.37E-05       |
|           |              |                          | MXE                    | +      | chr7:102395976-102396537  | chr7:102397619-102397698 | 0.196  | 0.000102901206 |
|           |              |                          | ES                     | +      | chr7:102395976-102396537  | NA                       | 0.301  | 0.000271826994 |
|           |              |                          | ES                     | +      | chr7:102397619-102397698  | NA                       | 0.122  | 0.0140171851   |
| PRMT2     | -3.181143107 | 5.87E-16                 | ES                     | +      | chr21:46636438-46636547   | NA                       | -0.729 | 0              |
|           |              |                          | RI                     | +      | chr21:46660832-46661936   | NA                       | 0.205  | 0.006535676432 |
| PROCA1    | -1.879371455 | 0.01774208688            | ES                     | -      | chr17:28706679-28706763   | NA                       | 0.381  | 0.000336973187 |
|           |              |                          | A3SS                   | -      | chr17:28704306-28704616   | chr17:28704306-28704435  | 0.396  | 0.01603843118  |
| PSMA3-AS1 | -1.50008569  | 1.84E-05                 | ES                     | -      | chr14:58293065-58293138   | NA                       | 0.417  | 1.58E-13       |
|           |              |                          | ES                     | -      | chr14:58288717-58288813   | NA                       | -0.432 | 7.31E-06       |
|           |              |                          | ES                     | -      | chr14:58285590-58285756   | NA                       | 0.308  | 1.18E-05       |
|           |              |                          | ES                     | -      | chr14:58293765-58295811   | NA                       | 0.201  | 4.24E-05       |
|           |              |                          | ES                     | -      | chr14:58273978-58274135   | NA                       | 0.237  | 7.74E-05       |
|           |              |                          | ES                     | -      | chr14:58285590-58285756   | NA                       | 0.289  | 0.000525528662 |
|           |              |                          | MXE                    | -      | chr14:58273978-58274010   | chr14:58285590-58285756  | 0.377  | 0.001136202548 |
|           |              |                          | A3SS                   | -      | chr14:58273978-58274135   | chr14:58273978-58274010  | 0.23   | 0.00508214036  |
|           |              |                          | MXE                    | -      | chr14:58285590-58285756   | chr14:58291634-58291707  | -0.248 | 0.005483540331 |
| ES        | -            | chr14:58293313-58293544  | NA                     | 0.102  | 0.005554562012            |                          |        |                |
| PSTK      | 1.127310752  | 0.01195941578            | ES                     | +      | chr10:122986299-122986375 | NA                       | 0.104  | 0.04261741669  |
| PTBP2     | -1.71189802  | 0.000169340531           | A3SS                   | +      | chr1:96804784-96804939    | chr1:96804799-96804939   | 0.389  | 0.03982276621  |
| PTPMT1    | -1.543709706 | 0.000558997362           | ES                     | +      | chr11:47569699-47569891   | NA                       | 0.32   | 0              |
| PTPN4     | -1.779165956 | 0.000652537197           | ES                     | +      | chr2:119881785-119881830  | NA                       | 0.222  | 5.64E-05       |
| PTPRA     | -1.998838714 | 1.10E-06                 | ES                     | +      | chr20:2947981-2948024     | NA                       | 0.158  | 0.004696244476 |
| PTPRD     | -6.138160757 | 1.92E-12                 | ES                     | -      | chr9:8437197-8437239      | NA                       | -0.283 | 6.82E-05       |
| PVT1      | 1.306446058  | 0.004494224275           | ES                     | +      | chr8:127983903-127984204  | NA                       | 0.173  | 1.02E-05       |
|           |              |                          | ES                     | +      | chr8:128099369-128099573  | NA                       | 0.182  | 2.16E-05       |
|           |              |                          | MXE                    | +      | chr8:127939507-127939676  | chr8:127983903-127984204 | -0.137 | 0.000100701606 |
|           |              |                          | ES                     | +      | chr8:127983903-127984204  | NA                       | 0.228  | 0.001136224867 |
| ES        | +            | chr8:128070159-128070272 | NA                     | -0.138 | 0.003876184563            |                          |        |                |
| PXMP2     | -2.741124337 | 4.98E-05                 | ES                     | +      | chr12:132695883-132696046 | NA                       | -0.16  | 0.03033077178  |
| QKI       | -2.873719689 | 4.43E-14                 | ES                     | +      | chr6:163455278-163455421  | NA                       | -0.424 | 0              |
|           |              |                          | A3SS                   | +      | chr6:163565945-163566795  | chr6:163566720-163566795 | -0.573 | 0              |
|           |              |                          | RI                     | +      | chr6:163563419-163570145  | NA                       | 0.602  | 3.34E-14       |

|              |              |                |      |   |                          |                          |        |                |
|--------------|--------------|----------------|------|---|--------------------------|--------------------------|--------|----------------|
|              |              |                | A3SS | + | chr6:163564666-163570145 | chr6:163565945-163570145 | 0.545  | 3.14E-09       |
|              |              |                | MXE  | + | chr6:163534981-163535125 | chr6:163561981-163562069 | 0.124  | 1.07E-08       |
|              |              |                | RI   | + | chr6:163563419-163570145 | NA                       | 0.403  | 4.78E-07       |
|              |              |                | MXE  | + | chr6:163534981-163535125 | chr6:163561981-163562069 | 0.124  | 2.92E-06       |
|              |              |                | A3SS | + | chr6:163563419-163563719 | chr6:163563443-163563719 | 0.127  | 1.90E-05       |
|              |              |                | MXE  | + | chr6:163455278-163455421 | chr6:163534981-163535125 | -0.168 | 3.05E-05       |
| RAB26        | 1.469735496  | 0.005051953101 | ES   | + | chr16:2151129-2151315    | NA                       | 0.161  | 0.002964538658 |
| RAB3IP       | 1.710010051  | 0.007890185133 | ES   | + | chr12:69812777-69812877  | NA                       | -0.262 | 6.76E-08       |
| RABEPK       | 1.007530426  | 0.02016004222  | ES   | + | chr9:125213369-125213522 | NA                       | 0.256  | 2.92E-10       |
|              |              |                | ES   | + | chr9:125220538-125220700 | NA                       | 0.194  | 3.05E-07       |
|              |              |                | MXE  | + | chr9:125220538-125220700 | chr9:125227909-125228059 | 0.116  | 0.004332221339 |
|              |              |                | MXE  | + | chr9:125220538-125220700 | chr9:125227909-125228059 | 0.102  | 0.01742082734  |
| RABGAP1      | -1.418405523 | 0.01182730268  | ES   | + | chr9:122945331-122945432 | NA                       | 0.112  | 0.001312112384 |
| RABGEF1      | 1.725345461  | 0.001619465417 | MXE  | + | chr7:66739995-66740792   | chr7:66771882-66772078   | -0.192 | 7.65E-05       |
| RAC1         | -1.355164181 | 0.000244410226 | ES   | + | chr7:6398661-6398718     | NA                       | 0.261  | 4.82E-06       |
| RAD51        | 1.432194582  | 0.000237839215 | A5SS | + | chr15:40695173-40695425  | chr15:40695173-40695321  | -0.159 | 0.000245554480 |
| RAD9A        | 1.305442359  | 0.0105912549   | A3SS | + | chr11:67393690-67393790  | chr11:67393722-67393790  | 0.407  | 0.02636430401  |
| RALGAPA2     | -1.489220243 | 9.40E-06       | ES   | - | chr20:20396694-20396734  | NA                       | -0.421 | 0.0255521065   |
| RAP1GAP      | -1.748237365 | 0.000911836653 | A3SS | - | chr1:21602803-21603912   | chr1:21602803-21602913   | -0.117 | 7.66E-09       |
|              |              |                | A3SS | - | chr1:21597960-21598095   | chr1:21597960-21598040   | 0.321  | 0.001576710913 |
|              |              |                | A3SS | - | chr1:21597960-21598064   | chr1:21597960-21598040   | 0.156  | 0.002071148324 |
| RAPGEF2      | -1.409371468 | 0.001218870822 | ES   | + | chr4:159344035-159344059 | NA                       | -0.824 | 0              |
| RB1CC1       | 1.242945521  | 0.02377184471  | ES   | - | chr8:52685936-52686156   | NA                       | 0.105  | 0.000140901881 |
| RBM23        | -1.47130468  | 5.57E-06       | ES   | - | chr14:22905605-22905659  | NA                       | 0.136  | 6.52E-08       |
|              |              |                | ES   | - | chr14:22908332-22908380  | NA                       | -0.228 | 1.15E-05       |
| RBM26-AS1    | -1.372105486 | 0.01108391598  | ES   | + | chr13:79417834-79417916  | NA                       | 0.207  | 0.0179359004   |
| RBM6         | -1.011106047 | 0.03993438768  | ES   | + | chr3:49972058-49972148   | NA                       | -0.301 | 1.54E-10       |
|              |              |                | RI   | + | chr3:50061461-50062108   | NA                       | -0.347 | 1.98E-07       |
|              |              |                | ES   | + | chr3:49975322-49975392   | NA                       | -0.313 | 2.49E-06       |
|              |              |                | ES   | + | chr3:49967197-49968748   | NA                       | 0.109  | 2.69E-05       |
|              |              |                | MXE  | + | chr3:50048244-50048319   | chr3:50054334-50054395   | 0.131  | 0.000205403459 |
|              |              |                | A3SS | + | chr3:49967197-49968748   | chr3:49967469-49968748   | 0.154  | 0.02566195299  |
| RCBTB2       | -4.409763263 | 2.01E-15       | ES   | - | chr13:48524658-48524757  | NA                       | -0.139 | 0.007914741791 |
| RECQL        | 1.531731314  | 1.24E-05       | ES   | - | chr12:21501169-21501372  | NA                       | -0.113 | 0.002987512401 |
|              |              |                | A3SS | - | chr12:21501169-21501372  | chr12:21501169-21501215  | -0.117 | 0.02462972179  |
|              |              |                | ES   | - | chr12:21501169-21501215  | NA                       | -0.14  | 0.03400412644  |
| RFWD3        | 1.11757597   | 0.006083751041 | ES   | - | chr16:74664623-74664745  | NA                       | 0.289  | 0.04080879163  |
| RGL1         | -1.914148063 | 6.35E-06       | MXE  | + | chr1:183806374-183806485 | chr1:183847565-183847774 | -0.141 | 0.02946769912  |
| RGMB-AS1     | -2.82462874  | 0.02763328829  | ES   | - | chr5:98771655-98771766   | NA                       | 0.667  | 2.10E-07       |
| RGS5         | 2.484751525  | 2.49E-05       | ES   | - | chr1:163319181-163319291 | NA                       | -0.123 | 0.001702146197 |
|              |              |                | ES   | - | chr1:163248529-163248598 | NA                       | 0.186  | 0.03328327983  |
| RHOQ         | -1.664656514 | 0.000497939125 | ES   | + | chr2:46543753-46543812   | NA                       | -0.264 | 0.005789128017 |
| RIDA         | 1.471036813  | 0.000227919518 | ES   | - | chr8:98108645-98108713   | NA                       | 0.106  | 0.00140484798  |
| RIN2         | 1.964168698  | 0.00137101705  | ES   | + | chr20:19964951-19965024  | NA                       | -0.162 | 0.001397451056 |
| RIPK2        | 1.600186203  | 0.001553100893 | ES   | + | chr8:89762828-89762982   | NA                       | -0.303 | 0.007952215332 |
| RNF157       | -3.845677675 | 8.58E-09       | ES   | - | chr17:76155251-76155317  | NA                       | 0.122  | 0.0145371809   |
| RNF19B       | 2.087396167  | 6.12E-06       | MXE  | - | chr1:32942251-32942459   | chr1:32944018-32944159   | 0.179  | 0.03033891155  |
| RNF32        | 2.667459828  | 0.02334372343  | A3SS | + | chr7:156676294-156677130 | chr7:156676418-156677130 | -0.385 | 0.002902268724 |
| RNMT         | 1.890106209  | 1.51E-05       | ES   | + | chr18:13759941-13760208  | NA                       | -0.162 | 0.000409380521 |
| ROBO1        | -1.805351697 | 0.000386310645 | ES   | - | chr3:78693347-78693356   | NA                       | 0.306  | 2.98E-07       |
| RP11-1228E12 | 1.830938095  | 0.03593843095  | ES   | - | chr17:71365-71556        | NA                       | 0.667  | 0.001952422279 |
| RP11-156P1.3 | -1.092878188 | 0.03206607327  | ES   | - | chr17:47072471-47072559  | NA                       | 0.494  | 0.000788106904 |
|              |              |                | ES   | - | chr17:47033277-47033381  | NA                       | 0.171  | 0.02472987573  |
| RP4-639F20.1 | 2.662459679  | 8.82E-09       | A3SS | + | chr1:94962924-94963270   | chr1:94962978-94963270   | 0.159  | 0.02193666938  |
| RPL12        | 1.429467442  | 7.62E-05       | RI   | - | chr9:127449609-127451405 | NA                       | 0.177  | 0.000119603100 |
| RPL21        | 1.16409132   | 0.02213664948  | MXE  | + | chr13:27253764-27253843  | chr13:27255241-27255349  | 0.201  | 0.006700381109 |
|              |              |                | MXE  | + | chr13:27253764-27253843  | chr13:27255241-27255354  | 0.205  | 0.006823004384 |
| RPL3         | 1.104790604  | 0.004135022035 | RI   | - | chr22:39313190-39314208  | NA                       | -0.286 | 0.000796534118 |
| RPP40        | -1.061085731 | 0.01746395472  | ES   | - | chr6:4998715-4998841     | NA                       | 0.204  | 6.11E-06       |
| RPS27        | 1.340957822  | 0.000907220942 | RI   | + | chr1:153990762-153991034 | NA                       | -0.166 | 2.22E-10       |



|          |              |                |      |   |                           |                          |  |        |                |
|----------|--------------|----------------|------|---|---------------------------|--------------------------|--|--------|----------------|
|          |              |                | ES   | + | chr1:153990913-153991034  | NA                       |  | 0.186  | 0.04298664594  |
| RPS3     | 1.164655539  | 0.00311883998  | ES   | + | chr11:75401639-75401733   | NA                       |  | -0.255 | 0.001839342785 |
| RPS6KB2  | 1.231233459  | 0.001936588515 | MXE  | + | chr11:67431367-67431515   | chr11:67432352-67432492  |  | 0.107  | 0.000575271427 |
|          |              |                | MXE  | + | chr11:67431367-67431515   | chr11:67432355-67432492  |  | 0.108  | 0.000729447841 |
|          |              |                | ES   | + | chr11:67432355-67432492   | NA                       |  | -0.228 | 0.003857761711 |
|          |              |                | ES   | + | chr11:67432352-67432492   | NA                       |  | -0.222 | 0.00513160654  |
| RPTOR    | 1.680011242  | 0.000254392584 | ES   | + | chr17:80925369-80925480   | NA                       |  | 0.262  | 0.04458274527  |
| RTKN     | -2.49647924  | 9.56E-10       | ES   | - | chr2:74439550-74439977    | NA                       |  | -0.359 | 0.002527404038 |
| RUFY3    | -2.021686763 | 0.000133193976 | MXE  | + | chr4:70789494-70789592    | chr4:70793764-70793904   |  | -0.252 | 0.005649545712 |
| SACS     | 2.252386019  | 8.15E-06       | ES   | - | chr13:23341444-23341690   | NA                       |  | -0.213 | 1.17E-10       |
| SBNO2    | 1.447993006  | 0.01511098396  | ES   | - | chr19:1147308-1147420     | NA                       |  | -0.3   | 0.001484505828 |
| SCHIP1   | -1.896485882 | 0.00147597191  | MXE  | + | chr3:159866162-159866281  | chr3:159886206-159886324 |  | -0.247 | 0              |
| SCLT1    | 1.401555349  | 0.01282257651  | ES   | - | chr4:128942995-128943188  | NA                       |  | 0.136  | 0.03286776765  |
| SCYL1    | 1.545494851  | 0.003111621492 | RI   | + | chr11:65538269-65538704   | NA                       |  | -0.15  | 0.005191038741 |
| SEC14L2  | -1.335052376 | 0.0185284686   | ES   | + | chr22:30415947-30416087   | NA                       |  | 0.154  | 0.000126474028 |
|          |              |                | ES   | + | chr22:30415758-30416087   | NA                       |  | 0.117  | 0.000292565238 |
|          |              |                | ES   | + | chr22:30415758-30415865   | NA                       |  | 0.109  | 0.000366701875 |
| SEPT2    | -1.010013484 | 0.0142321712   | ES   | + | chr2:241324408-241324662  | NA                       |  | 0.718  | 0              |
|          |              |                | MXE  | + | chr2:241317498-241317599  | chr2:241324408-241324662 |  | -0.404 | 1.58E-05       |
|          |              |                | ES   | + | chr2:241324408-241324662  | NA                       |  | 0.489  | 0.000119680357 |
|          |              |                | ES   | + | chr2:241316421-241316540  | NA                       |  | -0.447 | 0.001538786731 |
|          |              |                | ES   | + | chr2:241317498-241317599  | NA                       |  | -0.488 | 0.02613073178  |
| SEPT7    | -2.503100507 | 6.00E-13       | ES   | + | chr7:35831491-35832034    | NA                       |  | -0.326 | 0              |
|          |              |                | ES   | + | chr7:35831352-35831496    | NA                       |  | -0.389 | 8.87E-05       |
|          |              |                | ES   | + | chr7:35831424-35831496    | NA                       |  | -0.371 | 0.000802562723 |
| SEPT7P2  | -1.5492593   | 0.000138111781 | ES   | - | chr7:45728831-45729026    | NA                       |  | 0.255  | 7.82E-11       |
| SERHL2   | -6.70343082  | 2.88E-06       | ES   | + | chr22:42573633-42573745   | NA                       |  | 0.73   | 1.31E-09       |
|          |              |                | A5SS | + | chr22:42571120-42571901   | chr22:42571120-42571203  |  | 0.324  | 1.14E-05       |
|          |              |                | RI   | + | chr22:42555663-42556083   | NA                       |  | 0.355  | 8.44E-05       |
| SETD4    | -1.309390555 | 0.000166057130 | A3SS | - | chr21:36058815-36058973   | chr21:36058815-36058924  |  | 0.195  | 0.03505499569  |
| SETD9    | -4.251404359 | 3.77E-17       | ES   | + | chr5:56911168-56911536    | NA                       |  | 0.363  | 3.97E-05       |
| SH3BP2   | -2.246801789 | 0.003933020251 | A3SS | + | chr4:2831922-2832412      | chr4:2832330-2832412     |  | -0.38  | 0.01237140713  |
| SIDT2    | -1.229256527 | 0.01615281415  | ES   | + | chr11:117186989-117187001 | NA                       |  | -0.102 | 0.001234249565 |
| SIL1     | 1.740002194  | 7.11E-05       | ES   | - | chr5:139127943-139128052  | NA                       |  | 0.447  | 4.68E-06       |
| SIPA1L3  | 1.621798139  | 0.009677210874 | MXE  | + | chr19:38119305-38119882   | chr19:38130497-38130772  |  | -0.122 | 0.008360219703 |
| SIRT7    | 1.280458303  | 0.000419290467 | RI   | - | chr17:81914293-81915512   | NA                       |  | -0.388 | 8.29E-05       |
| SLC16A4  | -5.396769728 | 2.81E-14       | ES   | - | chr1:110378852-110379356  | NA                       |  | 0.19   | 0.000400911488 |
| SLC22A17 | -1.4546415   | 0.02866036952  | A5SS | - | chr14:23347459-23347731   | chr14:23347513-23347731  |  | -0.149 | 0.00896509776  |
| SLC25A19 | 1.289248701  | 0.04036255058  | A5SS | - | chr17:75288387-75288591   | chr17:75288497-75288591  |  | -0.227 | 8.47E-05       |
|          |              |                | A5SS | - | chr17:75288497-75288591   | chr17:75288501-75288591  |  | 0.165  | 0.000713535124 |
| SLC25A22 | 1.073915209  | 0.04186119758  | ES   | - | chr11:796042-796367       | NA                       |  | -0.298 | 0.000390645863 |
| SLC25A29 | -2.248481258 | 1.87E-07       | ES   | - | chr14:100298026-100298190 | NA                       |  | 0.417  | 0.001127335634 |
| SLC25A40 | -1.147453659 | 0.004064043798 | ES   | - | chr7:87860071-87860169    | NA                       |  | 0.144  | 0.02566581821  |
| SLC29A1  | 1.920056266  | 5.26E-09       | MXE  | + | chr6:44227262-44227342    | chr6:44229389-44229471   |  | -0.303 | 0              |
|          |              |                | MXE  | + | chr6:44227262-44227342    | chr6:44229389-44229471   |  | 0.274  | 4.53E-11       |
|          |              |                | ES   | + | chr6:44225972-44226167    | NA                       |  | -0.228 | 3.37E-06       |
|          |              |                | ES   | + | chr6:44226060-44226167    | NA                       |  | -0.312 | 1.18E-05       |
|          |              |                | ES   | + | chr6:44226060-44226167    | NA                       |  | -0.22  | 0.003873995416 |
|          |              |                | ES   | + | chr6:44226060-44226167    | NA                       |  | -0.201 | 0.01275158129  |
| SLC2A11  | -1.269476672 | 0.03262397763  | ES   | + | chr22:23877384-23877869   | NA                       |  | -0.319 | 9.42E-06       |
|          |              |                | A3SS | + | chr22:23875084-23875241   | chr22:23875120-23875241  |  | -0.59  | 0.004351922584 |
| SLC38A6  | -1.146823099 | 0.03948874047  | ES   | + | chr14:61034018-61034113   | NA                       |  | -0.104 | 0.001528473657 |
| SLC38A9  | -1.102937651 | 0.03174089186  | MXE  | - | chr5:55656714-55656774    | chr5:55664692-55664863   |  | 0.106  | 0.02053550709  |
| SLC3A2   | 1.460644012  | 0.00830256746  | ES   | + | chr11:62870744-62870837   | NA                       |  | 0.475  | 0              |
|          |              |                | ES   | + | chr11:62871576-62871669   | NA                       |  | 0.132  | 0.03843822808  |
| SLC47A1  | 1.87458136   | 0.008743852052 | ES   | + | chr17:19571477-19571572   | NA                       |  | 0.191  | 0.001141438719 |
| SLC50A1  | 1.565384987  | 6.64E-05       | ES   | + | chr1:155136827-155136951  | NA                       |  | 0.332  | 1.70E-06       |
|          |              |                | ES   | + | chr1:155136827-155136951  | NA                       |  | 0.296  | 0.000110375191 |
|          |              |                | ES   | + | chr1:155137560-155137722  | NA                       |  | 0.133  | 0.000352212672 |
|          |              |                | ES   | + | chr1:155137578-155137722  | NA                       |  | 0.148  | 0.000665949902 |

|         |              |                |      |   |                           |                          |        |                |
|---------|--------------|----------------|------|---|---------------------------|--------------------------|--------|----------------|
| SLC7A11 | 2.225019393  | 1.05E-05       | ES   | - | chr4:138185120-138185244  | NA                       | -0.542 | 9.09E-08       |
|         |              |                | ES   | - | chr4:138223198-138223324  | NA                       | -0.163 | 0.000199745017 |
| SMARCC2 | -1.063520582 | 0.000926498163 | A5SS | - | chr12:56164302-56164731   | chr12:56164647-56164731  | 0.43   | 1.46E-05       |
|         |              |                | ES   | - | chr12:56172936-56173029   | NA                       | -0.191 | 2.01E-05       |
|         |              |                | ES   | - | chr12:56164302-56164368   | NA                       | 0.483  | 0.000311022291 |
| SMTN    | 2.681079236  | 1.62E-07       | A3SS | + | chr22:31088453-31088606   | chr22:31088512-31088606  | 0.149  | 0.00185771104  |
|         |              |                | ES   | + | chr22:31080449-31080754   | NA                       | -0.259 | 0.002442197371 |
| SNHG11  | -1.126572362 | 0.02635014089  | ES   | + | chr20:38447929-38448093   | NA                       | -0.161 | 0.02738999534  |
| SNHG3   | 2.007679738  | 9.72E-05       | ES   | + | chr1:28508127-28508160    | NA                       | 0.173  | 0.0111445589   |
| SNHG6   | 1.619245894  | 1.16E-05       | ES   | - | chr8:66922613-66922725    | NA                       | -0.151 | 0              |
| SNHG8   | 3.401142657  | 2.65E-08       | A5SS | + | chr4:118278708-118279137  | chr4:118278708-118278792 | -0.114 | 0.000990167683 |
| SNX11   | -1.34865531  | 0.00189522751  | ES   | + | chr17:48110707-48110767   | NA                       | -0.122 | 4.93E-05       |
| SON     | -1.19079563  | 8.55E-06       | ES   | + | chr21:33572550-33572630   | NA                       | -0.263 | 0              |
| SP110   | 1.142791827  | 0.001863938051 | ES   | - | chr2:230216780-230216821  | NA                       | -0.134 | 0.04267665388  |
| SP140L  | 2.932572231  | 1.28E-12       | ES   | + | chr2:230328756-230328831  | NA                       | -0.363 | 0.000167484406 |
| SPAG1   | 4.676396214  | 1.16E-23       | ES   | + | chr8:100220278-100220431  | NA                       | -0.111 | 0.003664403339 |
|         |              |                | MXE  | + | chr8:100213818-100213918  | chr8:100220278-100220431 | 0.178  | 0.03855224577  |
| SPAG5   | 1.444661329  | 3.84E-05       | RI   | - | chr17:28579750-28580120   | NA                       | -0.101 | 2.69E-09       |
| SPATA4  | 3.165186094  | 0.003400696606 | ES   | - | chr4:176192957-176193076  | NA                       | -0.321 | 0.00010612589  |
| SPATS2  | 1.474620984  | 0.000463250775 | ES   | + | chr12:49371227-49371290   | NA                       | -0.28  | 1.33E-05       |
| SPEF2   | 3.786749972  | 5.41E-08       | ES   | + | chr5:35644354-35644525    | NA                       | -0.32  | 9.18E-05       |
| SPIN3   | -1.02601748  | 0.02299982084  | A3SS | - | chrX:56978579-56978762    | chrX:56978579-56978660   | 0.322  | 5.15E-06       |
|         |              |                | A3SS | - | chrX:56978579-56978747    | chrX:56978579-56978660   | 0.322  | 1.29E-05       |
|         |              |                | A3SS | - | chrX:56978579-56978751    | chrX:56978579-56978660   | 0.318  | 1.35E-05       |
| SPPL2A  | -1.1827833   | 0.002553452309 | ES   | - | chr15:50726072-50726126   | NA                       | 0.135  | 0.01789049185  |
| SPRY1   | -3.912389351 | 0.000339711427 | ES   | + | chr4:123397610-123397856  | NA                       | 0.155  | 0.000870311140 |
| SREBF1  | 1.511079099  | 0.01662573772  | ES   | - | chr17:17817547-17817591   | NA                       | 0.375  | 0.0013265261   |
|         |              |                | ES   | - | chr17:17823517-17823607   | NA                       | 0.302  | 0.008461191506 |
|         |              |                | RI   | - | chr17:17817547-17817916   | NA                       | -0.223 | 0.01127882976  |
| SRSF6   | -1.135706591 | 3.91E-05       | ES   | + | chr20:43459152-43459420   | NA                       | -0.11  | 0.000938808030 |
| SS18    | -1.026121465 | 0.000811369334 | MXE  | - | chr18:26080304-26080423   | chr18:26084051-26084175  | -0.557 | 9.01E-05       |
|         |              |                | MXE  | - | chr18:26080304-26080423   | chr18:26082362-26082528  | -0.419 | 0.000165960160 |
|         |              |                | ES   | - | chr18:26035830-26035923   | NA                       | 0.123  | 0.003304618959 |
| SSH1    | -1.210330621 | 0.02404780723  | ES   | - | chr12:108802321-108802368 | NA                       | -0.175 | 0.0250286001   |
| ST20    | 1.093934916  | 0.02882289017  | ES   | - | chr15:79907628-79907684   | NA                       | -1     | 0              |
| ST3GAL5 | -3.300851484 | 0.000588957399 | MXE  | - | chr2:85851263-85851703    | chr2:85852859-85853099   | -0.153 | 0.000619848871 |
|         |              |                | MXE  | - | chr2:85851263-85851703    | chr2:85852859-85853091   | -0.148 | 0.000836217543 |
|         |              |                | MXE  | - | chr2:85851263-85851703    | chr2:85852859-85853000   | -0.212 | 0.001463632539 |
|         |              |                | ES   | - | chr2:85870071-85870258    | NA                       | 0.324  | 0.02209414026  |
| ST3GAL6 | -2.436643253 | 2.20E-10       | ES   | + | chr3:98756368-98756540    | NA                       | 0.151  | 0.02805536072  |
| ST5     | -3.325106723 | 1.61E-11       | ES   | - | chr11:8729949-8731209     | NA                       | 0.325  | 0.000714324807 |
|         |              |                | A3SS | - | chr11:8702571-8703611     | chr11:8702571-8702720    | -0.104 | 0.01220499947  |
| STAG3L3 | -1.758547837 | 0.004817898663 | ES   | - | chr7:73000357-73000481    | NA                       | -0.569 | 0.000438379529 |
| STARD4  | 2.836661212  | 7.11E-13       | ES   | - | chr5:111501961-111502088  | NA                       | 0.133  | 0.02770700481  |
| STAT2   | -1.017569891 | 0.000642882523 | RI   | - | chr12:56354777-56355351   | NA                       | -0.129 | 0.0174877641   |
| STYXL1  | -2.704520263 | 1.01E-05       | ES   | - | chr7:76021850-76021992    | NA                       | 0.112  | 0.003498861351 |
|         |              |                | ES   | - | chr7:76013741-76013887    | NA                       | 0.105  | 0.003523797492 |
| SUSD1   | -3.382783751 | 2.94E-05       | ES   | - | chr9:112042100-112042165  | NA                       | -0.11  | 0.01062440517  |
| SVIL    | -2.159804119 | 0.000607367883 | ES   | - | chr10:29532001-29532172   | NA                       | -0.376 | 2.63E-06       |
|         |              |                | ES   | - | chr10:29526960-29527056   | NA                       | -0.202 | 7.64E-06       |
|         |              |                | ES   | - | chr10:29535988-29536069   | NA                       | -0.202 | 0.04292658489  |
| SYNE2   | -2.479573527 | 1.14E-05       | ES   | + | chr14:64098746-64098821   | NA                       | 0.232  | 0.000938468137 |
| SYNJ1   | -1.590950773 | 3.08E-05       | ES   | - | chr21:32634860-32634884   | NA                       | -0.634 | 4.13E-11       |
|         |              |                | ES   | - | chr21:32634860-32634881   | NA                       | -0.289 | 6.83E-05       |
| TADA2A  | -1.238555727 | 0.000336288305 | MXE  | + | chr17:37426949-37427009   | chr17:37437737-37437922  | -0.353 | 0.000772029136 |
|         |              |                | ES   | + | chr17:37423508-37423615   | NA                       | 0.112  | 0.007108285273 |
| TAF1D   | 1.84307435   | 0.000189951980 | A5SS | - | chr11:93736693-93737239   | chr11:93737063-93737239  | -0.127 | 1.32E-10       |
| TAF2    | 1.180512274  | 0.005026043336 | ES   | - | chr8:119744880-119745036  | NA                       | 0.283  | 1.62E-08       |
| TANC1   | -2.836249914 | 7.73E-14       | RI   | + | chr2:159219237-159219867  | NA                       | -0.182 | 0.01003146764  |
| TAPT1   | -1.490575276 | 0.000430933133 | ES   | - | chr4:16170652-16170729    | NA                       | -0.159 | 0.01024382028  |

|          |              |                |      |   |                           |                          |        |                |
|----------|--------------|----------------|------|---|---------------------------|--------------------------|--------|----------------|
| TATDN1   | 3.26461441   | 1.65E-12       | ES   | - | chr8:124522150-124522200  | NA                       | 0.101  | 0.002762253283 |
| TAX1BP1  | -1.020367875 | 0.01765393428  | A5SS | + | chr7:27816348-27816520    | chr7:27816348-27816394   | 0.103  | 5.39E-05       |
| TBC1D31  | 2.526802507  | 8.82E-14       | ES   | + | chr8:123082701-123082817  | NA                       | -0.101 | 0.000452081202 |
| TBC1D32  | 2.354456866  | 0.000132871583 | ES   | - | chr6:121090852-121091041  | NA                       | -0.271 | 1.21E-05       |
|          |              |                | ES   | - | chr6:121299445-121299505  | NA                       | -0.161 | 0.000571601245 |
|          |              |                | ES   | - | chr6:121255327-121255410  | NA                       | -0.174 | 0.000938515980 |
|          |              |                | A3SS | - | chr6:121115171-121115747  | chr6:121115171-121115241 | 0.264  | 0.03686690828  |
| TBC1D7   | -1.645422456 | 3.55E-05       | ES   | - | chr6:13325093-13325174    | NA                       | 0.194  | 0.01448293753  |
| TBC1D8B  | 2.272984517  | 6.35E-08       | ES   | + | chrX:106839325-106839457  | NA                       | -0.271 | 4.34E-05       |
|          |              |                | ES   | + | chrX:106839307-106839457  | NA                       | -0.193 | 0.000257758414 |
| TBC1D9B  | 1.363305773  | 0.004627839498 | ES   | - | chr5:179867444-179867495  | NA                       | -0.158 | 0              |
| TBL2     | -1.483785536 | 0.000778199389 | ES   | - | chr7:73576540-73576701    | NA                       | -0.221 | 0.006525933172 |
| TCEA1    | 1.021016919  | 0.02475288636  | ES   | - | chr8:54002891-54003092    | NA                       | -0.308 | 0.000990626250 |
|          |              |                | ES   | - | chr8:54002891-54003086    | NA                       | -0.261 | 0.0075854768   |
|          |              |                | ES   | - | chr8:54002891-54002940    | NA                       | -0.315 | 0.01533786035  |
| TCEAL8   | -1.00031066  | 0.04956146826  | ES   | - | chrX:103254604-103254677  | NA                       | 0.212  | 6.41E-13       |
| TCF4     | -6.396944488 | 9.15E-25       | A5SS | - | chr18:55232508-55232671   | chr18:55232520-55232671  | 0.431  | 5.01E-06       |
|          |              |                | RI   | - | chr18:55228846-55232671   | NA                       | 0.753  | 7.37E-05       |
|          |              |                | RI   | - | chr18:55228846-55232671   | NA                       | -0.136 | 0.000666479782 |
| TCF7L2   | -2.759525068 | 0.001075604654 | ES   | + | chr10:113160618-113160691 | NA                       | 0.805  | 0.000153796721 |
|          |              |                | MXE  | + | chr10:113159919-113159992 | chr10:113160618-11316069 | -0.684 | 0.000707600869 |
|          |              |                | ES   | + | chr10:113159919-113159992 | NA                       | -0.415 | 0.002988281976 |
| TCOF1    | 2.715985488  | 2.38E-08       | ES   | + | chr5:150379228-150379408  | NA                       | 0.127  | 2.19E-11       |
|          |              |                | ES   | + | chr5:150372005-150372236  | NA                       | 0.13   | 0.003432257142 |
| TCTN1    | -1.353109434 | 0.001925945779 | ES   | + | chr12:110644966-110645129 | NA                       | 0.225  | 0.000867862258 |
|          |              |                | ES   | + | chr12:110644966-110645143 | NA                       | 0.283  | 0.002401590692 |
|          |              |                | ES   | + | chr12:110634395-110634463 | NA                       | 0.353  | 0.005171587045 |
|          |              |                | A3SS | + | chr12:110647195-110647336 | chr12:110647210-11064733 | 0.456  | 0.009968353808 |
| TCTN2    | -1.430464998 | 0.01907818385  | ES   | + | chr12:123694841-123694976 | NA                       | 0.273  | 5.84E-06       |
| TEAD2    | -2.08855701  | 0.003726359863 | ES   | - | chr19:49355958-49355970   | NA                       | -0.145 | 0.000154946153 |
|          |              |                | ES   | - | chr19:49359843-49360081   | NA                       | -0.101 | 0.000362805466 |
| TEAD4    | 1.779013698  | 0.001677124986 | ES   | + | chr12:2959947-2960353     | NA                       | -0.59  | 7.68E-06       |
| TET2     | -1.726384486 | 7.26E-05       | ES   | + | chr4:105241338-105241429  | NA                       | 0.147  | 0.005143745186 |
|          |              |                | ES   | + | chr4:105190359-105190505  | NA                       | 0.155  | 0.02398359823  |
| TFDP1    | -1.671615367 | 0.007794169846 | MXE  | + | chr13:113610995-113611062 | chr13:113631622-11363174 | -0.13  | 0.000762542582 |
|          |              |                | MXE  | + | chr13:113610995-113611062 | chr13:113623179-11362328 | -0.147 | 0.001750191041 |
|          |              |                | ES   | + | chr13:113631622-113631905 | NA                       | 0.13   | 0.01092216805  |
| TGFB3    | -2.174138043 | 7.01E-06       | ES   | - | chr14:75960268-75960386   | NA                       | -0.128 | 0.009293494939 |
| THAP5    | -1.078117063 | 0.008204994159 | ES   | - | chr7:108565829-108566022  | NA                       | 0.157  | 0.000545223317 |
|          |              |                | ES   | - | chr7:108565951-108566022  | NA                       | 0.278  | 0.000942157194 |
| THRB     | -2.247924883 | 0.04737934441  | ES   | - | chr3:24297225-24297371    | NA                       | -0.304 | 0.005335128453 |
| TIA1     | -1.927848441 | 3.09E-06       | ES   | - | chr2:70229058-70229091    | NA                       | -0.349 | 1.08E-13       |
|          |              |                | ES   | - | chr2:70228343-70228462    | NA                       | -0.465 | 4.53E-11       |
|          |              |                | A5SS | - | chr2:70216752-70216994    | chr2:70216885-70216994   | 0.191  | 1.98E-07       |
| TIAM1    | -2.07132173  | 0.00924211985  | ES   | - | chr21:31276731-31276908   | NA                       | -0.388 | 0.02905195337  |
| TJP1     | -1.630312674 | 0.004748682988 | ES   | - | chr15:29719776-29720016   | NA                       | -0.238 | 2.38E-05       |
| TKFC     | 1.504730346  | 0.000541183066 | MXE  | + | chr11:61335839-61335937   | chr11:61336203-61336390  | -0.446 | 0.000306133701 |
|          |              |                | ES   | + | chr11:61343341-61343458   | NA                       | -0.109 | 0.002348355715 |
|          |              |                | ES   | + | chr11:61335839-61335937   | NA                       | -0.113 | 0.03969952441  |
| TKT      | 1.141137656  | 0.0377038072   | A3SS | - | chr3:53237796-53237921    | chr3:53237796-53237820   | -0.501 | 1.07E-07       |
| TMA16    | 1.194177342  | 0.01931921015  | MXE  | + | chr4:163514073-163514158  | chr4:163515312-163515461 | -0.108 | 0.005271854269 |
| TMEM117  | -1.419785806 | 0.000325336688 | ES   | + | chr12:44143524-44143624   | NA                       | -0.285 | 0.006170354981 |
| TMEM161A | 1.158196105  | 0.03903221258  | ES   | - | chr19:19134783-19134916   | NA                       | -0.602 | 4.20E-05       |
|          |              |                | MXE  | - | chr19:19133129-19133210   | chr19:19134783-19134887  | 0.142  | 0.002295330497 |
|          |              |                | ES   | - | chr19:19134783-19134887   | NA                       | -0.228 | 0.03346111353  |
| TMEM178A | -4.806759992 | 2.90E-05       | ES   | + | chr2:39707048-39707186    | NA                       | 0.269  | 2.40E-05       |
| TMEM198B | -1.744418197 | 0.000443742202 | RI   | + | chr12:55830840-55831349   | NA                       | 0.33   | 1.84E-08       |
|          |              |                | A3SS | + | chr12:55832870-55833014   | chr12:55832958-55833014  | 0.387  | 4.38E-06       |
|          |              |                | A5SS | + | chr12:55832958-55833038   | chr12:55832958-55833014  | 0.385  | 0.000399128713 |
|          |              |                | RI   | + | chr12:55832958-55833541   | NA                       | 0.151  | 0.000400561250 |

|              |              |                |      |   |                           |                          |        |                |
|--------------|--------------|----------------|------|---|---------------------------|--------------------------|--------|----------------|
| TMEM267      | 1.174500718  | 0.02200779639  | ES   | - | chr5:43479889-43479987    | NA                       | -0.131 | 0.04751393873  |
| TMEM39A      | 1.114901907  | 0.000123257389 | ES   | - | chr3:119435754-119435935  | NA                       | -0.321 | 2.44E-10       |
| TMEM63B      | 1.061736475  | 0.003785927863 | ES   | + | chr6:44135327-44135366    | NA                       | 0.149  | 2.00E-05       |
|              |              |                | MXE  | + | chr6:44150563-44150629    | chr6:44151845-44152008   | -0.191 | 0.002658984414 |
| TMEM80       | -1.310460343 | 0.007157746281 | RI   | + | chr11:698868-700235       | NA                       | 0.241  | 9.73E-06       |
| TMEM87B      | 1.286252218  | 0.005893794913 | ES   | + | chr2:112074911-112074962  | NA                       | -0.152 | 0.004874200486 |
|              |              |                | ES   | + | chr2:112077191-112077282  | NA                       | -0.121 | 0.007276760501 |
| TMTC4        | -1.460991474 | 0.000449087764 | ES   | - | chr13:100670359-100670569 | NA                       | 0.222  | 1.46E-06       |
|              |              |                | ES   | - | chr13:100670282-100670569 | NA                       | 0.327  | 1.64E-06       |
| TNC          | -7.489376663 | 1.49E-10       | MXE  | - | chr9:115048259-115048532  | chr9:115059729-115060002 | 0.464  | 3.13E-05       |
|              |              |                | MXE  | - | chr9:115048259-115048532  | chr9:115059729-115060002 | 0.416  | 5.63E-05       |
|              |              |                | ES   | - | chr9:115048259-115048532  | NA                       | -0.601 | 0.000541520201 |
|              |              |                | MXE  | - | chr9:115048259-115048532  | chr9:115064646-115064919 | 0.187  | 0.03274388609  |
|              |              |                | MXE  | - | chr9:115046409-115046682  | chr9:115048259-115048532 | -0.285 | 0.04224761506  |
| TNFRSF12A    | 2.04597705   | 0.04984552332  | ES   | + | chr16:3021188-3021319     | NA                       | -0.144 | 0.001101883147 |
|              |              |                | ES   | + | chr16:3021214-3021319     | NA                       | -0.123 | 0.001898049618 |
| TNFSF13      | -2.944961944 | 0.03695774867  | MXE  | + | chr17:7559623-7559702     | chr17:7559850-7559893    | -0.476 | 3.35E-06       |
|              |              |                | MXE  | + | chr17:7559623-7559702     | chr17:7559845-7559893    | -0.405 | 9.38E-06       |
| TNIK         | -2.903496877 | 0.001557595646 | ES   | - | chr3:171139469-171139556  | NA                       | -0.604 | 3.94E-11       |
|              |              |                | ES   | - | chr3:171128713-171128878  | NA                       | 0.129  | 0.00168795208  |
| TOP1MT       | 1.130399805  | 0.01595215506  | ES   | - | chr8:143332486-143332657  | NA                       | -0.317 | 1.32E-09       |
|              |              |                | ES   | - | chr8:143334107-143334285  | NA                       | -0.35  | 1.38E-06       |
|              |              |                | ES   | - | chr8:143332486-143332601  | NA                       | -0.232 | 8.45E-05       |
| TOX2         | 1.841117966  | 0.01826355756  | ES   | + | chr20:44065711-44066107   | NA                       | -0.576 | 0.02126672239  |
| TPGS2        | -1.401330585 | 7.91E-05       | ES   | - | chr18:36805373-36805397   | NA                       | 0.211  | 9.62E-09       |
| TPK1         | 1.484219136  | 0.000152871539 | ES   | - | chr7:144681806-144681864  | NA                       | -0.484 | 0.01202735009  |
| TPM2         | 4.718007161  | 1.31E-21       | MXE  | - | chr9:35684731-35684807    | chr9:35685063-35685139   | 0.365  | 8.39E-13       |
|              |              |                | RI   | - | chr9:35684487-35685139    | NA                       | -0.633 | 3.04E-07       |
| TPT1-AS1     | -2.889017128 | 3.55E-10       | MXE  | + | chr13:45378529-45378671   | chr13:45383090-45383235  | -0.625 | 6.05E-07       |
|              |              |                | MXE  | + | chr13:45379194-45379335   | chr13:45383090-45383235  | -0.547 | 3.37E-06       |
|              |              |                | A3SS | + | chr13:45390713-45390902   | chr13:45390757-45390902  | 0.12   | 1.61E-05       |
|              |              |                | ES   | + | chr13:45390757-45390902   | NA                       | 0.148  | 1.99E-05       |
|              |              |                | ES   | + | chr13:45390713-45390902   | NA                       | 0.109  | 2.67E-05       |
|              |              |                | MXE  | + | chr13:45379194-45379335   | chr13:45383090-45383235  | -0.37  | 3.21E-05       |
|              |              |                | MXE  | + | chr13:45379925-45380001   | chr13:45383090-45383235  | -0.293 | 8.84E-05       |
|              |              |                | MXE  | + | chr13:45379925-45380001   | chr13:45383090-45383235  | -0.308 | 9.27E-05       |
|              |              |                | MXE  | + | chr13:45379194-45380001   | chr13:45383090-45383235  | -0.377 | 0.000188143965 |
|              |              |                | A3SS | + | chr13:45377060-45377215   | chr13:45377139-45377215  | 0.22   | 0.00019763891  |
|              |              |                | MXE  | + | chr13:45379194-45380001   | chr13:45383090-45383235  | -0.397 | 0.000310183700 |
|              |              |                | ES   | + | chr13:45360140-45360239   | NA                       | 0.619  | 0.004168487247 |
|              |              |                | MXE  | + | chr13:45383090-45383235   | chr13:45389734-45389820  | 0.107  | 0.018188216    |
|              |              |                | MXE  | + | chr13:45379898-45380001   | chr13:45383090-45383235  | -0.116 | 0.03030437867  |
| TRABD        | 1.696639361  | 0.005296480166 | RI   | + | chr22:50197822-50198186   | NA                       | -0.409 | 0.000651342608 |
| TRABD2A      | 4.547917093  | 4.49E-09       | MXE  | - | chr2:84839148-84839323    | chr2:84841860-84842007   | -0.25  | 0.03053270545  |
| TRAF3IP2-AS1 | -1.702715019 | 3.10E-05       | ES   | + | chr6:111574620-111574658  | NA                       | -0.317 | 0.01210955425  |
| TRIM22       | -3.201786811 | 0.003809392918 | RI   | + | chr11:5697247-5698545     | NA                       | 0.236  | 0.03643105134  |
| TRIM41       | 1.089862148  | 0.01306965592  | ES   | + | chr5:181233412-181233435  | NA                       | -0.132 | 0.00683098948  |
| TRIM9        | -3.555181903 | 2.26E-08       | ES   | - | chr14:51000682-51000828   | NA                       | 0.253  | 0.000645221412 |
| TRIQK        | 1.513918681  | 0.000522520545 | MXE  | - | chr8:92921502-92921660    | chr8:92954405-92954564   | -0.132 | 1.64E-09       |
|              |              |                | ES   | - | chr8:92921502-92921660    | NA                       | 0.286  | 0.000185566505 |
|              |              |                | A3SS | - | chr8:92885319-92886735    | chr8:92885319-92886667   | -0.188 | 0.003596342349 |
|              |              |                | ES   | - | chr8:92921502-92921660    | NA                       | 0.19   | 0.00409329242  |
| TRMO         | -1.823014284 | 0.00206196536  | ES   | - | chr9:97916163-97916338    | NA                       | 0.189  | 0.001827589487 |
|              |              |                | ES   | - | chr9:97912872-97912975    | NA                       | -0.12  | 0.01516291276  |
| TSPAN4       | 1.47852995   | 0.03182322762  | ES   | + | chr11:850287-850367       | NA                       | -0.239 | 3.83E-05       |
| TTC3         | -1.411619257 | 0.000190155777 | ES   | + | chr21:37150819-37150884   | NA                       | -0.141 | 2.10E-11       |
|              |              |                | ES   | + | chr21:37094004-37094090   | NA                       | 0.175  | 1.50E-06       |
| TTC7A        | 1.236208095  | 0.02253544339  | ES   | + | chr2:46958494-46958552    | NA                       | -0.432 | 0.004065365915 |
| TTL11        | -1.55986009  | 0.000941336903 | ES   | - | chr9:122031722-122031856  | NA                       | 0.221  | 0.03455480269  |
| TXLNA        | 1.00075337   | 0.00428866993  | MXE  | + | chr1:32184524-32184616    | chr1:32187953-32188124   | -0.196 | 0.001031064798 |

|           |              |                |      |   |                           |                          |        |                |
|-----------|--------------|----------------|------|---|---------------------------|--------------------------|--------|----------------|
| TXNRD1    | 1.49172468   | 0.02544450274  | MXE  | + | chr12:104290992-104291104 | chr12:104309758-10430995 | -0.697 | 4.20E-05       |
| TYSND1    | 1.019071886  | 0.002446071019 | ES   | - | chr10:70143841-70143972   | NA                       | -0.289 | 0.000311701948 |
| UBA7      | -1.808348574 | 0.01975944203  | ES   | - | chr3:49809389-49809464    | NA                       | 0.212  | 0.03434244633  |
| UBE2E1    | -1.162698735 | 0.002684419434 | ES   | + | chr3:23811459-23811510    | NA                       | -0.124 | 0              |
| UBE2F     | -1.537666482 | 0.001260329777 | ES   | + | chr2:237987962-237987992  | NA                       | 0.108  | 0.001458988257 |
|           |              |                | ES   | + | chr2:237994743-237994809  | NA                       | 0.194  | 0.001936623701 |
|           |              |                | ES   | + | chr2:237987962-237987992  | NA                       | 0.164  | 0.002623975802 |
| UBE2W     | 1.104073456  | 0.03299355355  | ES   | - | chr8:73870268-73870301    | NA                       | -0.19  | 4.28E-08       |
| UGGT1     | -1.915996479 | 3.57E-08       | ES   | + | chr2:128156391-128156415  | NA                       | -0.114 | 0.002140032246 |
| UGGT2     | -1.504955429 | 2.64E-05       | ES   | - | chr13:95860787-95860883   | NA                       | -0.462 | 1.74E-10       |
|           |              |                | MXE  | - | chr13:95859590-95859675   | chr13:95860787-95860883  | -0.253 | 0.000129838985 |
|           |              |                | MXE  | - | chr13:95856157-95856340   | chr13:95859590-95859675  | -0.204 | 0.001400276335 |
| ULBP2     | 1.906203493  | 0.001114037869 | ES   | + | chr6:149947319-149947451  | NA                       | 0.15   | 0.005873187661 |
| ULK4      | 1.312172531  | 0.000499960183 | ES   | - | chr3:41819422-41819506    | NA                       | -0.301 | 8.15E-05       |
|           |              |                | ES   | - | chr3:41915976-41916052    | NA                       | 0.403  | 0.01803272989  |
| UPF3A     | -1.593880475 | 6.92E-07       | ES   | + | chr13:114298839-114299000 | NA                       | 0.129  | 3.01E-05       |
|           |              |                | ES   | + | chr13:114286301-114286400 | NA                       | -0.217 | 0.000867862258 |
| UPP1      | 2.831806786  | 0.01090030194  | ES   | + | chr7:48103296-48103411    | NA                       | -0.155 | 0.001796423469 |
| URI1      | 2.834677087  | 1.93E-13       | ES   | + | chr19:29971192-29971227   | NA                       | -0.253 | 0.002066660603 |
| USP32P3   | -2.482787701 | 8.01E-07       | ES   | + | chr17:20420378-20420605   | NA                       | 0.582  | 1.10E-08       |
| USP54     | -2.161500499 | 0.01553958042  | ES   | - | chr10:73504849-73504990   | NA                       | 0.122  | 0.0168943985   |
| VCAN      | -10.59791853 | 6.34E-45       | ES   | + | chr5:83537006-83542268    | NA                       | 0.471  | 3.38E-05       |
| VEPH1     | 2.564739522  | 0.03915655096  | ES   | - | chr3:157495211-157495506  | NA                       | -0.107 | 0.003593871272 |
| VPS41     | -2.261133259 | 9.57E-11       | ES   | - | chr7:38796414-38796526    | NA                       | 0.11   | 1.23E-08       |
| VTI1B     | -1.383130372 | 1.77E-05       | ES   | - | chr14:67663028-67663190   | NA                       | -0.183 | 1.67E-10       |
| WARS      | -1.0592577   | 0.01615281415  | ES   | - | chr14:100375282-100375403 | NA                       | -0.232 | 1.37E-10       |
|           |              |                | ES   | - | chr14:100375282-100375406 | NA                       | -0.236 | 2.43E-10       |
|           |              |                | ES   | - | chr14:100375282-100375350 | NA                       | -0.205 | 7.15E-10       |
|           |              |                | ES   | - | chr14:100375282-100375350 | NA                       | -0.573 | 9.26E-05       |
|           |              |                | ES   | - | chr14:100375282-100375406 | NA                       | -0.432 | 0.001631060496 |
|           |              |                | ES   | - | chr14:100375282-100375350 | NA                       | -0.109 | 0.003593871272 |
|           |              |                | ES   | - | chr14:100375282-100375406 | NA                       | -0.185 | 0.04751030201  |
| WASH2P    | 1.286103579  | 0.01628826123  | ES   | + | chr2:113595062-113595161  | NA                       | -0.555 | 0.000350375615 |
| WBSR22    | -1.867522876 | 1.53E-05       | MXE  | + | chr7:73693623-73693669    | chr7:73693991-73694050   | -0.103 | 0.03980685599  |
| WDR20     | -1.134379684 | 0.000254392584 | ES   | + | chr14:102197754-102197847 | NA                       | 0.174  | 0.009240772418 |
| WDR4      | 1.877400742  | 6.14E-05       | MXE  | - | chr21:42859661-42859722   | chr21:42862281-42862394  | -0.158 | 0.02770680963  |
|           |              |                | MXE  | - | chr21:42855681-42855780   | chr21:42859661-42859722  | -0.189 | 0.04529641663  |
| WEE2-AS1  | -1.371126783 | 0.04272802559  | ES   | - | chr7:141714188-141714374  | NA                       | 0.275  | 0.000891391094 |
| WIPF1     | -1.877854311 | 1.55E-05       | ES   | - | chr2:174677044-174677124  | NA                       | 0.321  | 0.004005348732 |
| WIPI1     | 2.199242472  | 1.12E-06       | ES   | - | chr17:68434555-68434626   | NA                       | 0.101  | 0.00192549168  |
| WSB1      | -2.327253738 | 6.35E-06       | A3SS | + | chr17:27307743-27309272   | chr17:27309099-27309272  | -0.171 | 0              |
| WWP2      | -1.97774029  | 0.02010486098  | ES   | + | chr16:69783031-69783152   | NA                       | -0.18  | 0.000659813177 |
| XKR9      | 3.57442536   | 2.41E-05       | MXE  | + | chr8:70674817-70674899    | chr8:70680780-70681330   | 0.185  | 0.002440740444 |
| YLPM1     | -1.017819958 | 0.001002470897 | ES   | + | chr14:74824255-74824307   | NA                       | -0.119 | 0.000506087906 |
| ZBED3-AS1 | -1.506734757 | 0.00271888178  | ES   | + | chr5:77100235-77100391    | NA                       | 0.276  | 0.009747054499 |
| ZBTB1     | -1.036029902 | 0.02315678997  | ES   | + | chr14:64516599-64516751   | NA                       | 0.31   | 6.58E-06       |
| ZBTB21    | -1.040193851 | 0.04872465371  | ES   | - | chr21:42002896-42002961   | NA                       | -0.134 | 0.03287761207  |
|           |              |                | ES   | - | chr21:42002349-42002503   | NA                       | 0.3    | 0.03885696071  |
| ZBTB38    | 1.447947042  | 0.008308455737 | ES   | + | chr3:141438242-141438365  | NA                       | 0.146  | 0.04507777634  |
| ZC3H14    | -1.091280277 | 0.000180568967 | ES   | + | chr14:88602827-88603060   | NA                       | 0.23   | 6.94E-06       |
|           |              |                | ES   | + | chr14:88601923-88602083   | NA                       | 0.325  | 0.000154138242 |
|           |              |                | ES   | + | chr14:88602827-88603045   | NA                       | 0.265  | 0.000317236808 |
|           |              |                | ES   | + | chr14:88596733-88596808   | NA                       | 0.164  | 0.002711949392 |
|           |              |                | ES   | + | chr14:88601923-88602083   | NA                       | 0.154  | 0.04519826484  |
| ZDHHC15   | -2.442360766 | 3.07E-06       | ES   | - | chrX:75429077-75429198    | NA                       | -0.334 | 0.01080928689  |
| ZDHHC17   | -1.032897555 | 0.02019774548  | ES   | + | chr12:76821057-76821167   | NA                       | 0.148  | 0.002782691887 |
| ZFAND1    | 2.270683786  | 6.65E-08       | ES   | - | chr8:81717248-81717288    | NA                       | -0.224 | 0.04922594537  |
| ZFAND2A   | -1.817010382 | 0.003714018982 | A3SS | - | chr7:1152906-1153241      | chr7:1152906-1153224     | 0.139  | 0.02999909818  |
| ZFAND5    | -1.333078315 | 7.09E-06       | MXE  | - | chr9:72356930-72357056    | chr9:72360109-72360221   | 0.19   | 0              |
|           |              |                | ES   | - | chr9:72363469-72363606    | NA                       | -0.426 | 0              |



|         |              |                |     |   |                          |                          |        |                |
|---------|--------------|----------------|-----|---|--------------------------|--------------------------|--------|----------------|
| ZSCAN31 | -1.453863139 | 0.002312761048 | ES  | - | chr6:28329302-28329714   | NA                       | 0.38   | 8.71E-05       |
|         |              |                | ES  | - | chr6:28329302-28329778   | NA                       | 0.367  | 0.000114900623 |
| ZSWIM7  | -1.5524246   | 2.08E-05       | ES  | - | chr17:15986799-15986892  | NA                       | 0.184  | 0.000434850546 |
|         |              |                | ES  | - | chr17:15986799-15986886  | NA                       | 0.15   | 0.003676103307 |
|         |              |                | RI  | - | chr17:15977578-15977913  | NA                       | -0.191 | 0.02434367906  |
| ZUFSP   | 1.758944026  | 0.004122196302 | MXE | - | chr6:116660735-116660846 | chr6:116666633-116666912 | -0.12  | 0.03791778075  |

**Supplementary Table 8:** Alternatively spliced and differentially expressed protein-coding genes in GSCs significantly associated with prognosis in mesenchymal and proneural GBM.

**PART A. Univariate analysis of protein-coding genes**

| gene.symbol | higher.expression.GSCs | MES GBM samples |           | PN GBM samples   |           |
|-------------|------------------------|-----------------|-----------|------------------|-----------|
|             |                        | log-rank.pvalue | prognosis | log-rank.pvalue  | prognosis |
| LRRFIP1     | MES                    | <b>0.0089</b>   | poor      | <b>0.0209</b>    | poor      |
| WBSCR22     | PN                     | 0.4699          | ----      | <b>&lt;0.001</b> | poor      |
| EMILIN2     | PN                     | 0.5632          | ----      | <b>0.0198</b>    | poor      |
| CC2D2A      | PN                     | 0.5877          | ----      | <b>0.0208</b>    | better    |
| RABGAP1     | PN                     | 0.8292          | ----      | <b>0.0279</b>    | better    |
| FAXDC2      | PN                     | 0.2130          | ----      | <b>0.0289</b>    | better    |
| TIAM1       | PN                     | 0.9708          | ----      | <b>0.0318</b>    | better    |
| ATP6V1B1    | PN                     | 0.4047          | ----      | <b>0.0350</b>    | poor      |
| SLC25A40    | PN                     | 0.4172          | ----      | <b>0.0406</b>    | poor      |
| TCTN2       | PN                     | 0.5923          | ----      | <b>0.0419</b>    | poor      |
| SH3BP2      | PN                     | 0.5459          | ----      | <b>0.0495</b>    | poor      |
| DOCK10      | PN                     | 0.3564          | ----      | <b>0.0499</b>    | better    |

**PART B. Multivariate analysis of protein-coding genes and clinical parameters in mesenchymal GBM**

| variable               | LRRFIP1   |                |               |
|------------------------|-----------|----------------|---------------|
|                        | beta.coef | Wald.statistic | Cox.pvalue    |
| gene                   | 0.3576    | 2.1732         | <b>0.0298</b> |
| age at diagnosis       | 1.0235    | 2.1386         | <b>0.0325</b> |
| gender                 | -0.5672   | -0.9263        | 0.3543        |
| CIMP status            | ----      | ----           | ----          |
| IDH1 mutation          | ----      | ----           | ----          |
| MGMT methylation       | 0.6664    | 1.0655         | 0.2866        |
| chr 19/20 co-gain      | -0.3824   | -0.4919        | 0.6228        |
| chr 7 gain/chr 10 loss | 1.6639    | 3.0849         | <b>0.0020</b> |

\*significant variables (p<0.05)

**PART C. Multivariate analysis of protein-coding genes and clinical parameters in proneural GBM**

| variable               | WBSCR22   |                |               | EMILIN2   |                |               | CC2D2A    |                |               |
|------------------------|-----------|----------------|---------------|-----------|----------------|---------------|-----------|----------------|---------------|
|                        | beta.coef | Wald.statistic | Cox.pvalue    | beta.coef | Wald.statistic | Cox.pvalue    | beta.coef | Wald.statistic | Cox.pvalue    |
| gene                   | 0.4371    | 2.8880         | <b>0.0039</b> | 0.3057    | 2.2905         | <b>0.0220</b> | -0.6509   | -2.1904        | <b>0.0285</b> |
| age at diagnosis       | 0.6586    | 0.7622         | 0.4459        | 1.7669    | 1.7764         | 0.0757        | 0.9869    | 1.2168         | 0.2237        |
| gender                 | 2.0447    | 2.1251         | <b>0.0336</b> | 1.3444    | 1.5675         | 0.1170        | 1.4648    | 1.6988         | 0.0894        |
| CIMP status            | -0.4641   | -0.2689        | 0.7880        | -1.3122   | -0.9068        | 0.3645        | -1.6557   | -0.9882        | 0.3230        |
| IDH1 mutation          | 0.6683    | 0.3387         | 0.7348        | 1.1980    | 0.7027         | 0.4823        | 2.4601    | 1.3693         | 0.1709        |
| MGMT methylation       | -0.6517   | -0.8580        | 0.3909        | -0.2245   | -0.3230        | 0.7467        | -0.5978   | -0.8284        | 0.4075        |
| chr 19/20 co-gain      | 2.5858    | 2.0582         | <b>0.0396</b> | 3.0716    | 2.3222         | <b>0.0202</b> | 1.9142    | 1.6647         | 0.0960        |
| chr 7 gain/chr 10 loss | -3.1405   | -2.4756        | <b>0.0133</b> | -3.2788   | -3.3061        | <b>0.0009</b> | -3.0877   | -2.7108        | <b>0.0067</b> |

| variable               | RABGAP1   |                |               | FAXDC2    |                |               | TIAM1     |                |               |
|------------------------|-----------|----------------|---------------|-----------|----------------|---------------|-----------|----------------|---------------|
|                        | beta.coef | Wald.statistic | Cox.pvalue    | beta.coef | Wald.statistic | Cox.pvalue    | beta.coef | Wald.statistic | Cox.pvalue    |
| gene                   | -0.4898   | -2.6637        | <b>0.0077</b> | -0.3867   | -2.3636        | <b>0.0181</b> | -0.4516   | -2.3453        | <b>0.0190</b> |
| age at diagnosis       | 1.5329    | 1.6473         | 0.0995        | 1.0947    | 1.2361         | 0.2164        | 0.9877    | 1.1502         | 0.2500        |
| gender                 | 1.0491    | 1.3994         | 0.1617        | 1.5410    | 1.9416         | 0.0522        | 0.9314    | 1.2902         | 0.1970        |
| CIMP status            | -0.7617   | -0.5088        | 0.6109        | 0.5045    | 0.2817         | 0.7781        | -0.8702   | -0.6871        | 0.4920        |
| IDH1 mutation          | 1.3375    | 0.7748         | 0.4385        | 0.4471    | 0.2210         | 0.8251        | 1.9105    | 1.2648         | 0.2059        |
| MGMT methylation       | -0.1112   | -0.1626        | 0.8708        | -0.5255   | -0.7487        | 0.4541        | -0.2856   | -0.4097        | 0.6820        |
| chr 19/20 co-gain      | 3.6093    | 2.6960         | <b>0.0070</b> | 3.8169    | 2.7339         | <b>0.0063</b> | 3.2484    | 2.5389         | <b>0.0111</b> |
| chr 7 gain/chr 10 loss | -2.9092   | -2.6597        | <b>0.0078</b> | -3.6507   | -3.1298        | <b>0.0017</b> | -2.7238   | -2.4488        | <b>0.0143</b> |

| variable | ATP6V1B1  |                |               | SLC25A40  |                |               | TCTN2     |                |               |
|----------|-----------|----------------|---------------|-----------|----------------|---------------|-----------|----------------|---------------|
|          | beta.coef | Wald.statistic | Cox.pvalue    | beta.coef | Wald.statistic | Cox.pvalue    | beta.coef | Wald.statistic | Cox.pvalue    |
| gene     | 0.9800    | 2.7176         | <b>0.0066</b> | -0.6519   | -1.9933        | <b>0.0462</b> | -0.5079   | -2.1521        | <b>0.0314</b> |



|                        |         |         |               |         |         |               |         |         |               |
|------------------------|---------|---------|---------------|---------|---------|---------------|---------|---------|---------------|
| age at diagnosis       | 1.2171  | 1.2241  | 0.2209        | 0.0986  | 0.1209  | 0.9038        | 1.3442  | 1.3018  | 0.1930        |
| gender                 | 1.3306  | 1.7217  | 0.0851        | 0.8510  | 1.2075  | 0.2272        | 1.9354  | 2.0847  | <b>0.0371</b> |
| CIMP status            | -1.0483 | -0.4788 | 0.6321        | -1.0927 | -0.9923 | 0.3211        | -0.3113 | -0.2644 | 0.7915        |
| IDH1 mutation          | 1.2353  | 0.5064  | 0.6126        | 3.4524  | 2.1729  | <b>0.0298</b> | 2.3793  | 1.5883  | 0.1122        |
| MGMT methylation       | -0.1912 | -0.2778 | 0.7811        | 0.2864  | 0.3885  | 0.6977        | -0.7888 | -1.0348 | 0.3008        |
| chr 19/20 co-gain      | 2.4281  | 2.1981  | <b>0.0279</b> | 1.7522  | 1.4073  | 0.1593        | 3.2235  | 2.5165  | <b>0.0119</b> |
| chr 7 gain/chr 10 loss | -3.8004 | -3.4037 | <b>0.0007</b> | -3.4784 | -3.1967 | <b>0.0014</b> | -3.6597 | -3.1296 | <b>0.0018</b> |

| variable               | SH3BP2    |                |               | DOCK10    |                |               |
|------------------------|-----------|----------------|---------------|-----------|----------------|---------------|
|                        | beta.coef | Wald.statistic | Cox.pvalue    | beta.coef | Wald.statistic | Cox.pvalue    |
| gene                   | 0.4703    | 2.9020         | <b>0.0037</b> | -0.4336   | -2.5625        | <b>0.0104</b> |
| age at diagnosis       | -0.1829   | -0.1705        | 0.8646        | 2.4709    | 2.1732         | <b>0.0298</b> |
| gender                 | 1.6646    | 2.1857         | <b>0.0288</b> | 0.6621    | 0.9648         | 0.3346        |
| CIMP status            | -1.2888   | -0.4183        | 0.6757        | -1.2697   | -0.9045        | 0.3657        |
| IDH1 mutation          | 4.4787    | 1.2527         | 0.2103        | 1.0125    | 0.5902         | 0.5551        |
| MGMT methylation       | 0.9293    | 1.1462         | 0.2517        | 0.0835    | 0.1115         | 0.9112        |
| chr 19/20 co-gain      | 1.1558    | 0.9661         | 0.3340        | 3.7678    | 2.9061         | <b>0.0037</b> |
| chr 7 gain/chr 10 loss | -2.6520   | -2.9495        | <b>0.0032</b> | -2.8759   | -2.6857        | <b>0.0072</b> |

**Supplementary Table 9:** Co-expression of protein-coding genes associated with survival in PN GBM.

|          | RABGAP1           | CC2D2A             | WBSCR22            | SLC25A40 | SH3BP2            | ATP6V1B1        | EMILIN2            | DOCK10            | TIAM1           | TCTN2   | FAXDC2 |
|----------|-------------------|--------------------|--------------------|----------|-------------------|-----------------|--------------------|-------------------|-----------------|---------|--------|
| RABGAP1  | 1                 | ---                | ---                | ---      | ---               | ---             | ---                | ---               | ---             | ---     | ---    |
| CC2D2A   | <b>0.3778 *</b>   | 1                  | ---                | ---      | ---               | ---             | ---                | ---               | ---             | ---     | ---    |
| WBSCR22  | <b>-0.4728 **</b> | <b>-0.5614 ***</b> | 1                  | ---      | ---               | ---             | ---                | ---               | ---             | ---     | ---    |
| SLC25A40 | 0.1489            | 0.0202             | 0.1651             | 1        | ---               | ---             | ---                | ---               | ---             | ---     | ---    |
| SH3BP2   | -0.1133           | -0.1089            | 0.2537             | 0.0130   | 1                 | ---             | ---                | ---               | ---             | ---     | ---    |
| ATP6V1B1 | -0.2706           | -0.2227            | <b>0.4765 **</b>   | 0.0485   | <b>0.5485 ***</b> | 1               | ---                | ---               | ---             | ---     | ---    |
| EMILIN2  | <b>-0.4391 **</b> | <b>-0.4684 **</b>  | <b>0.4113 *</b>    | -0.0629  | 0.2745            | <b>0.3251 *</b> | 1                  | ---               | ---             | ---     | ---    |
| DOCK10   | <b>0.4522 **</b>  | <b>0.5113 **</b>   | <b>-0.3949 *</b>   | -0.2087  | -0.1564           | -0.0277         | <b>-0.5242 ***</b> | 1                 | ---             | ---     | ---    |
| TIAM1    | <b>0.5437 ***</b> | <b>0.3678 *</b>    | <b>-0.4822 **</b>  | -0.1319  | -0.0248           | -0.0955         | -0.2969            | <b>0.6133 ***</b> | 1               | ---     | ---    |
| TCTN2    | 0.0143            | 0.2205             | -0.0137            | 0.2529   | 0.1962            | -0.0242         | 0.1408             | -0.0546           | -0.0513         | 1       | ---    |
| FAXDC2   | 0.3104            | 0.2907             | <b>-0.5157 ***</b> | -0.0152  | -0.0399           | -0.2645         | <b>-0.4730 **</b>  | <b>0.4783 **</b>  | <b>0.4010 *</b> | -0.0701 | 1      |

\* p<0.05    \*\* p<0.01    \*\*\* p<0.001

**Supplementary Table 10:** List of cancer-related genes.

| <b>proto.oncogenes</b> | <b>tumor.suppressor.genes</b> |
|------------------------|-------------------------------|
| AKT1                   | ACVR1B                        |
| BRAF                   | APC                           |
| CTNNB1                 | ARID1A                        |
| DNMT3A                 | ARID2                         |
| EGFR                   | ASXL1                         |
| ERBB2                  | ATM                           |
| EZH2                   | B2M                           |
| FGFR2                  | BAP1                          |
| FGFR3                  | BCOR                          |
| FLT3                   | BRCA1                         |
| HRAS                   | CASP8                         |
| IDH1                   | CDH1                          |
| IDH2                   | CDKN2A                        |
| KIT                    | CEBPA                         |
| KRAS                   | EP300                         |
| MED12                  | FBXW7                         |
| NFE2L2                 | GATA3                         |
| NOTCH1                 | KDM5C                         |
| NPM1                   | KDM6A                         |
| NRAS                   | MAP3K1                        |
| PIK3CA                 | NCOR1                         |
| PTPN11                 | NF1                           |
| SF3B1                  | PBRM1                         |
| SPOP                   | PHF6                          |
| U2AF1                  | PIK3R1                        |
| ALK                    | PPP2R1A                       |
| CARD11                 | PTEN                          |
| HIST1H3B               | RB1                           |
| MAP2K1                 | RUNX1                         |
| MET                    | SETD2                         |
| MYD88                  | SMAD2                         |
| ABL1                   | SMAD4                         |
| AR                     | SMARCA4                       |
| GNAS                   | STAG2                         |
| JAK2                   | STK11                         |
| PDGFRA                 | TET2                          |
| AJUBA                  | TP53                          |
| ARID5B                 | VHL                           |
| CBFB                   | WT1                           |
| CCND1                  | CREBBP                        |
| CHD4                   | PRDM1                         |
| ELF3                   | SMARCB1                       |
| ERCC2                  | TSC1                          |
| FOXA1                  | ATRX                          |
| MTOR                   | BRCA2                         |

|         |          |
|---------|----------|
| MYB     | CDC73    |
| RAC1    | CIC      |
| RAD21   | CYLD     |
| RASA1   | RNF43    |
| RHEB    | ARHGAP35 |
| RHOA    | AXIN2    |
| RXRA    | BCLAF1   |
| SGK1    | CDK12    |
| SMC1A   | CDKN1A   |
| SMC3    | CDKN1B   |
| SOS1    | CHD8     |
| SPEN    | CTCF     |
| TBL1XR1 | DDX5     |
| TBX3    | GPS2     |
| TCF7L2  | HLA-A    |
| BCL2    | HLA-B    |
| CBL     | HSP90AB1 |
| CRLF2   | KEAP1    |
| CSF1R   | MAP2K4   |
| DNMT1   | NSD1     |
| FOXL2   | PCBP1    |
| FUBP1   | RPL5     |
| GATA1   | SOX17    |
| GATA2   | TCF7L2   |
| GNA11   | TGFBR2   |
| GNAQ    | TP53BP1  |
| H3F3A   | ZFHX3    |
| JAK1    | ARID1B   |
| JAK3    | AXIN1    |
| KLF4    | DAXX     |
| MPL     | HNF1A    |
| NOTCH2  | MEN1     |
| PAX5    | MLH1     |
| RET     | MSH2     |
| SETBP1  | MSH6     |
| SMO     | NF2      |
| SOX9    | PAX5     |
| SRSF2   | PTCH1    |
| TSHR    | SOCS1    |
| ABCB1   | TNFAIP3  |
| ADAM10  | TRAF7    |
| AKAP9   | ANAPC1   |
| AMPH    | ANKRD12  |
| ARHGEF6 | APAF1    |
| ASPM    | ATG13    |
| BUB1B   | ATR      |
| CAD     | BARD1    |

|          |          |
|----------|----------|
| CARM1    | BLM      |
| CAST     | BUB1B    |
| CLIP1    | CCAR1    |
| CLTC     | CDKN2C   |
| CREB1    | CHEK2    |
| CRTC1    | CLTC     |
| CRTC3    | COL18A1  |
| CTNND1   | DMD      |
| CTTN     | EIF4A2   |
| CUL1     | FANCA    |
| DICER1   | FBN2     |
| DOCK2    | FBXO11   |
| EEF1A1   | FOXA2    |
| ERBB2IP  | KALRN    |
| ESR1     | KIAA1109 |
| EWSR1    | LIFR     |
| FES      | MAP3K4   |
| FN1      | MATK     |
| GOLGA5   | MAX      |
| GOT2     | MST1     |
| HGF      | NAV3     |
| HSPA8    | NEDD4L   |
| HUWE1    | NLRP3    |
| IRS2     | NR1H2    |
| ITGA6    | PABPC1   |
| KIFC3    | PCM1     |
| LCP1     | PHLDA1   |
| LEPR     | POTEF    |
| LPP      | PRKCD    |
| LUM      | RBMX     |
| LYN      | RPL22    |
| MALAT1   | SIN3A    |
| MAP3K3   | SYNE1    |
| MAPK8IP1 | TJP2     |
| MAST2    | TOP3A    |
| MDC1     | TSC2     |
| MECOM    | TXNIP    |
| MEF2A    | ZFP36L1  |
| MLLT10   | ZFP36L2  |
| MLLT3    | ZNF132   |
| MLLT4    | ACO1     |
| MMP2     | ALPK2    |
| MN1      | ATP5B    |
| MSN      | AZGP1    |
| MYH9     | CCDC6    |
| NCOA3    | FAT1     |
| NCOR2    | ING1     |

|           |           |
|-----------|-----------|
| NONO      | IRF6      |
| NR4A2     | MED23     |
| NUMA1     | MGA       |
| NUP214    | MPO       |
| NUP98     | MUC17     |
| PCM1      | MYOCD     |
| PIK3CB    | NBPF1     |
| PIK3CG    | NTN4      |
| PIP5K1A   | ODAM      |
| PLCG1     | OMA1      |
| PLEC      | OTUD7A    |
| PRKAR1A   | PDSS2     |
| PRKCD     | PPP6C     |
| STAT3     | QKI       |
| SUZ12     | RBM10     |
| TAF1      | SERPINB13 |
| TCF12     | SIRT4     |
| TFDP1     | SLC26A3   |
| TGIF1     | TAP1      |
| TNFRSF10C | TRAF3     |
| TPR       | KMT2C     |
| TRIO      | KMT2D     |
| WHSC1     | AMER1     |
| WHSC1L1   |           |
| WRN       |           |
| ZMYM2     |           |
| ZNF300    |           |
| ACVR2B    |           |
| BRE       |           |
| CAP2      |           |
| CD1D      |           |
| CD70      |           |
| CDC27     |           |
| CDK4      |           |
| CNKSR1    |           |
| COL5A1    |           |
| CUL4B     |           |
| CUX1      |           |
| DDX3X     |           |
| DIAPH1    |           |
| DIS3      |           |
| EPHA2     |           |
| ERBB3     |           |
| EZR       |           |
| FAT1      |           |
| FGFBP1    |           |
| FOXQ1     |           |

GNA13  
GNB1  
IL7R  
INPPL1  
IRF4  
ITGB7  
MAP4K3  
MBD1  
MED23  
MORC4  
MUC17  
MYCN  
NTN4  
ODAM  
PLCG2  
POU2F2  
PPM1D  
RIT1  
RPS15  
RPS2  
SETDB1  
STX2  
TCEB1  
TIMM17A  
TNF  
TNFRSF14  
TPX2  
TRAF3  
WASF3  
XPO1  
KMT2D  
KMT2B  
SRSF2  
KMT2A

**Supplementary Table 11:** Differentially spliced and expressed cancer-related genes in GSCs.

|                               | AS        |           | AS & up-regulated |          | AS & down-regulated |           |
|-------------------------------|-----------|-----------|-------------------|----------|---------------------|-----------|
|                               | MES       | PN        | MES               | PN       | MES                 | PN        |
| <b>Proto-oncogenes</b>        | 22        | 17        | 1                 | 1        | 3                   | 8         |
| <b>Tumor suppressor genes</b> | 19        | 14        | 1                 | 2        | 5                   | 5         |
| <b>Total cancer genes</b>     | <b>41</b> | <b>31</b> | <b>2</b>          | <b>3</b> | <b>8</b>            | <b>13</b> |

\* MES: mesenchymal; PN: proneural; AS: alternative splicing



**Supplementary Table 12:** Functional annotation of genes exclusively undergoing splicing alterations in mesenchymal (MES) and proneural (PN) GSCs samples based on gene ontology (GO) terms for biological process (BP), cellular component (CC), and molecular function (MF).

| GO category      | GO term                                          | # genes | % genes      | FDR             |
|------------------|--------------------------------------------------|---------|--------------|-----------------|
| GOTERM_BP_DIRECT | GO:0006281~DNA repair                            | 55      | 2.819067145  | 3.70E-06        |
| GOTERM_BP_DIRECT | GO:0060271~cilium morphogenesis                  | 38      | 1.947719118  | 1.12E-05        |
| GOTERM_BP_DIRECT | GO:0042384~cilium assembly                       | 35      | 1.79395182   | 3.69E-05        |
| GOTERM_BP_DIRECT | GO:0051301~cell division                         | 65      | 3.331624808  | 0.001310342791  |
| GOTERM_BP_DIRECT | GO:0000398~mRNA splicing, via spliceosome        | 45      | 2.306509482  | 0.008430104661  |
| GOTERM_BP_DIRECT | GO:0000086~G2/M transition of mitotic cell cycle | 32      | 1.640184521  | 0.01364712908   |
| GOTERM_BP_DIRECT | GO:0007062~sister chromatid cohesion             | 26      | 1.332649923  | 0.0285266066    |
| GOTERM_CC_DIRECT | GO:0005654~nucleoplasm                           | 464     | 23.78267555  | 6.82E-35        |
| GOTERM_CC_DIRECT | GO:0005737~cytoplasm                             | 657     | 33.67503844  | 6.59E-15        |
| GOTERM_CC_DIRECT | GO:0005634~nucleus                               | 676     | 34.648898    | 9.83E-15        |
| GOTERM_CC_DIRECT | GO:0005829~cytosol                               | 442     | 22.65504869  | 7.31E-12        |
| GOTERM_CC_DIRECT | GO:0005813~centrosome                            | 91      | 4.664274731  | 5.32E-10        |
| GOTERM_CC_DIRECT | GO:0016607~nuclear speck                         | 47      | 2.409021015  | 2.51E-05        |
| GOTERM_CC_DIRECT | GO:0005814~centriole                             | 32      | 1.640184521  | 7.03E-05        |
| GOTERM_CC_DIRECT | GO:0005730~nucleolus                             | 131     | 6.714505382  | 9.41E-05        |
| GOTERM_CC_DIRECT | GO:0016020~membrane                              | 278     | 14.24910302  | 0.0006209350894 |
| GOTERM_CC_DIRECT | GO:0036064~ciliary basal body                    | 27      | 1.383905689  | 0.001692829306  |
| GOTERM_CC_DIRECT | GO:0005739~mitochondrion                         | 176     | 9.021014864  | 0.009257314479  |
| GOTERM_CC_DIRECT | GO:0000922~spindle pole                          | 27      | 1.383905689  | 0.01426062834   |
| GOTERM_CC_DIRECT | GO:1904115~axon cytoplasm                        | 14      | 0.7175807278 | 0.0162211246    |
| GOTERM_MF_DIRECT | GO:0005515~protein binding                       | 1088    | 55.76627371  | 4.14E-27        |
| GOTERM_MF_DIRECT | GO:0044822~poly(A) RNA binding                   | 199     | 10.19989749  | 3.66E-13        |
| GOTERM_MF_DIRECT | GO:0003723~RNA binding                           | 87      | 4.459251666  | 0.01536239243   |

**Supplementary Table 13:** Functional annotation of genes exclusively undergoing expression alterations between mesenchymal (MES) and proneural (PN) GSCs samples based on KEGG pathways gene ontology (GO) terms for biological process (BP), cellular component (CC), and molecular function (MF).

**Up-regulated genes in MES**

| Category         | Term                          | # genes | % genes     | FDR           |
|------------------|-------------------------------|---------|-------------|---------------|
| GOTERM_BP_DIRECT | GO:0098609~cell-cell adhesion | 46      | 2.212602213 | 0.04799407647 |
| GOTERM_MF_DIRECT | GO:0005515~protein binding    | 866     | 41.65464165 | 0.04744372776 |

**Up-regulated genes in PN**

| Category         | Term                                                                            | # genes | % genes      | FDR             |
|------------------|---------------------------------------------------------------------------------|---------|--------------|-----------------|
| GOTERM_BP_DIRECT | GO:0006351~transcription, DNA-templated                                         | 323     | 12.75167785  | 3.58E-08        |
| GOTERM_BP_DIRECT | GO:0007399~nervous system development                                           | 72      | 2.842479274  | 9.92E-07        |
| GOTERM_BP_DIRECT | GO:0006355~regulation of transcription, DNA-templated                           | 250     | 9.8697197    | 6.38E-06        |
| GOTERM_BP_DIRECT | GO:0007156~homophilic cell adhesion via plasma membrane adhesion molecules      | 46      | 1.816028425  | 1.56E-05        |
| GOTERM_BP_DIRECT | GO:0007155~cell adhesion                                                        | 95      | 3.750493486  | 6.75E-05        |
| GOTERM_BP_DIRECT | GO:0000122~negative regulation of transcription from RNA polymerase II promoter | 128     | 5.053296486  | 0.00235541617   |
| GOTERM_BP_DIRECT | GO:0007158~neuron cell-cell adhesion                                            | 11      | 0.4342676668 | 0.00375030318   |
| GOTERM_BP_DIRECT | GO:0045665~negative regulation of neuron differentiation                        | 21      | 0.8290564548 | 0.004961836942  |
| GOTERM_BP_DIRECT | GO:0010977~negative regulation of neuron projection development                 | 18      | 0.7106198184 | 0.008066097786  |
| GOTERM_BP_DIRECT | GO:0007411~axon guidance                                                        | 40      | 1.579155152  | 0.009417216454  |
| GOTERM_BP_DIRECT | GO:0030198~extracellular matrix organization                                    | 46      | 1.816028425  | 0.01217008478   |
| GOTERM_BP_DIRECT | GO:0007416~synapse assembly                                                     | 21      | 0.8290564548 | 0.02206267871   |
| GOTERM_BP_DIRECT | GO:0051965~positive regulation of synapse assembly                              | 21      | 0.8290564548 | 0.02900744251   |
| GOTERM_CC_DIRECT | GO:0005578~proteinaceous extracellular matrix                                   | 69      | 2.724042637  | 3.28E-07        |
| GOTERM_CC_DIRECT | GO:0030054~cell junction                                                        | 94      | 3.711014607  | 5.88E-05        |
| GOTERM_CC_DIRECT | GO:0009986~cell surface                                                         | 103     | 4.066324516  | 0.0005953719362 |
| GOTERM_CC_DIRECT | GO:0005622~intracellular                                                        | 204     | 8.053691275  | 0.02365275485   |
| GOTERM_MF_DIRECT | GO:0003700~transcription factor activity, sequence-specific DNA binding         | 174     | 6.869324911  | 1.48E-06        |
| GOTERM_MF_DIRECT | GO:0046872~metal ion binding                                                    | 320     | 12.63324122  | 1.34E-05        |
| GOTERM_MF_DIRECT | GO:0005509~calcium ion binding                                                  | 130     | 5.132254244  | 0.0002364379719 |
| GOTERM_MF_DIRECT | GO:0003676~nucleic acid binding                                                 | 161     | 6.356099487  | 0.005817301938  |
| GOTERM_MF_DIRECT | GO:0050840~extracellular matrix binding                                         | 13      | 0.5132254244 | 0.01829692888   |
| GOTERM_MF_DIRECT | GO:0005518~collagen binding                                                     | 20      | 0.789577576  | 0.04420150625   |
| KEGG_PATHWAY     | hsa05200:Pathways in cancer                                                     | 77      | 3.039873668  | 7.38E-05        |
| KEGG_PATHWAY     | hsa04360:Axon guidance                                                          | 32      | 1.263324122  | 0.006546766066  |
| KEGG_PATHWAY     | hsa04350:TGF-beta signaling pathway                                             | 23      | 0.9080142124 | 0.04864576473   |

**Supplementary Table 14:** RNA binding proteins (RBPs) mapped to spliceosome components.

| <b>RBP</b> | <b>up in MES</b> | <b>up in PN</b> | <b>AS.events</b> | <b>spliceosome</b> |
|------------|------------------|-----------------|------------------|--------------------|
| DHX38      | yes              | ----            | ----             | 2nd step factor    |
| SLU7       | yes              | ----            | ----             | 2nd step factor    |
| DDX50      | ----             | ----            | MES              | B act              |
| CACTIN     | ----             | ----            | MES              | Complex C          |
| GPATCH1    | yes              | ----            | ----             | Complex C          |
| PPIL3      | ----             | ----            | MES              | Complex C          |
| PPWD1      | ----             | ----            | MES              | Complex C          |
| WDR83      | ----             | ----            | PN               | Complex C          |
| TFIP11     | ----             | ----            | MES              | Complex C2         |
| FUS        | ----             | yes             | PN               | Complex A          |
| LUC7L      | ----             | yes             | ----             | Complex A          |
| PRPF40A    | ----             | ----            | MES              | Complex A          |
| RBM23      | ----             | yes             | MES & PN         | Complex A          |
| RBM25      | ----             | ----            | PN               | Complex A          |
| RBM39      | ----             | ----            | MES              | Complex A          |
| RBM5       | ----             | ----            | MES              | Complex A          |
| SF1        | ----             | ----            | MES              | Complex A          |
| PRPF38A    | ----             | ----            | PN               | Complex B          |
| PRPF4B     | ----             | ----            | MES & PN         | Complex B          |
| THRAP3     | ----             | ----            | MES              | Complex B          |
| ACIN1      | ----             | ----            | MES              | EJC/TREX           |
| SAP18      | ----             | yes             | ----             | EJC/TREX           |
| THOC1      | yes              | ----            | ----             | EJC/TREX           |
| THOC2      | ----             | ----            | MES              | EJC/TREX           |
| THOC5      | ----             | ----            | MES & PN         | EJC/TREX           |
| THOC6      | yes              | ----            | ----             | EJC/TREX           |
| HNRNPA1    | ----             | ----            | MES              | hnRNP              |
| HNRNPA2B1  | ----             | yes             | MES              | hnRNP              |
| HNRNPD     | ----             | ----            | MES & PN         | hnRNP              |
| HNRNPDL    | ----             | ----            | PN               | hnRNP              |
| HNRNPH1    | ----             | ----            | MES              | hnRNP              |
| HNRNPH3    | ----             | ----            | PN               | hnRNP              |
| HNRNPL     | ----             | ----            | MES              | hnRNP              |
| HNRNPM     | ----             | ----            | PN               | hnRNP              |
| HNRNPR     | ----             | ----            | PN               | hnRNP              |
| HNRNPUL1   | ----             | ----            | PN               | hnRNP              |
| PTBP2      | ----             | yes             | MES              | hnRNP              |
| PTBP3      | yes              | ----            | ----             | hnRNP              |
| RALY       | ----             | ----            | PN               | hnRNP              |
| LSM1       | ----             | ----            | PN               | Lsm protein        |
| LSM5       | ----             | yes             | ----             | Lsm protein        |
| CELF1      | ----             | ----            | MES              | MISC               |
| DHX9       | ----             | ----            | PN               | MISC               |

|         |      |      |          |                          |
|---------|------|------|----------|--------------------------|
| ILF3    | ---- | ---- | MES & PN | MISC                     |
| NSRP1   | ---- | ---- | MES & PN | MISC                     |
| PABPC1  | yes  | ---- | ----     | MISC                     |
| QKI     | ---- | yes  | MES & PN | MISC                     |
| RBFOX2  | ---- | ---- | PN       | MISC                     |
| XAB2    | yes  | ---- | ----     | Complex Prp19 associated |
| SNRPG   | ---- | ---- | PN       | Sm protein               |
| SNRPN   | ---- | ---- | MES      | Sm protein               |
| SREK1   | ---- | ---- | MES      | SR protein               |
| SRRM1   | ---- | ---- | MES      | SR protein               |
| SRSF12  | ---- | yes  | ----     | SR protein               |
| SRSF6   | ---- | yes  | MES      | SR protein               |
| SRSF7   | ---- | ---- | MES & PN | SR protein               |
| SNRNP70 | ---- | ---- | MES      | snRNP U1                 |
| SNRNP35 | ---- | yes  | ----     | snRNP U11/U12            |
| PHF5A   | ---- | ---- | PN       | snRNP U2                 |
| SF3B6   | yes  | ---- | ----     | snRNP U2                 |
| DDX46   | ---- | ---- | PN       | snRNP U2 associated      |
| PUF60   | ---- | ---- | MES      | snRNP U2 associated      |
| U2AF1   | ---- | yes  | ----     | snRNP U2 associated      |
| PRPF31  | ---- | ---- | MES      | snRNP U4/U6              |
| SNU13   | ---- | ---- | PN       | snRNP U4/U6              |
| SRPK2   | ---- | yes  | ----     | snRNP U5oU4/U6           |

**Supplementary Table 15:** Differentially expressed splicing-related RNA binding proteins (RBPs) between mesenchymal (MES) and proneural (PN) GSCs and GBM samples from TCGA.

| GSCs      |                |                 |              |
|-----------|----------------|-----------------|--------------|
| RBP       | log2FoldChange | FDR             | up.regulated |
| CELF2     | 9.197588986    | 3.31E-37        | PN           |
| U2AF1     | 4.008162325    | 1.11E-22        | PN           |
| MBNL3     | 7.840253782    | 2.85E-20        | PN           |
| POP4      | 2.558240582    | 3.06E-16        | MES          |
| RBM11     | 9.634986879    | 3.26E-14        | MES          |
| QKI       | 2.873719689    | 4.43E-14        | PN           |
| MVP       | 4.607741975    | 6.03E-14        | MES          |
| SRSF12    | 8.947413633    | 4.03E-13        | PN           |
| PPARGC1A  | 8.12470585     | 1.11E-12        | PN           |
| PABPC1    | 2.380206452    | 6.33E-12        | MES          |
| GPATCH1   | 1.971018955    | 1.16E-11        | MES          |
| POLR2D    | 1.884638485    | 3.73E-10        | PN           |
| RP9       | 2.602651596    | 9.96E-10        | PN           |
| NOVA1     | 3.14922289     | 1.31E-08        | PN           |
| UPF3A     | 1.593880475    | 6.92E-07        | PN           |
| TIA1      | 1.927848441    | 3.09E-06        | PN           |
| CLK4      | 1.941223901    | 3.54E-06        | PN           |
| RBM23     | 1.47130468     | 5.57E-06        | PN           |
| SON       | 1.19079563     | 8.55E-06        | PN           |
| LSM5      | 1.225545572    | 1.26E-05        | PN           |
| RBMS3     | 2.084815207    | 3.15E-05        | PN           |
| SLU7      | 1.473450764    | 3.22E-05        | MES          |
| SRSF6     | 1.135706591    | 3.91E-05        | PN           |
| CCNT2     | 1.499508598    | 4.38E-05        | PN           |
| SFPQ      | 1.301935116    | 4.51E-05        | PN           |
| ADAT1     | 1.502652197    | 6.01E-05        | PN           |
| ZNF326    | 1.548570916    | 0.0001216444844 | PN           |
| PTBP2     | 1.71189802     | 0.0001693405314 | PN           |
| LUC7L     | 1.204263891    | 0.0001700296867 | PN           |
| SMN2      | 4.577968467    | 0.0001945506733 | PN           |
| TRMT1L    | 1.3881325      | 0.0001964197515 | MES          |
| DHX38     | 1.461842975    | 0.0002464800835 | MES          |
| SRPK2     | 1.236213978    | 0.0003627820659 | PN           |
| SAP18     | 1.211323091    | 0.0004215602091 | PN           |
| DUSP11    | 1.167737455    | 0.000506676372  | MES          |
| HNRNPA2B1 | 1.125577478    | 0.0007407571256 | PN           |
| PTBP3     | 1.157095553    | 0.0007908280334 | MES          |
| SCAF4     | 1.029350091    | 0.0009154269133 | PN           |
| SNRNP35   | 1.116655399    | 0.001132352051  | PN           |
| FUS       | 1.199979067    | 0.001206886185  | PN           |
| SMG6      | 1.280044418    | 0.002746806291  | PN           |
| POLDIP3   | 1.1845829      | 0.00411630455   | PN           |
| SF3B6     | 1.299698683    | 0.01084435673   | MES          |
| XAB2      | 1.301967349    | 0.01598622458   | MES          |
| POLR2J    | 1.083909056    | 0.01842346686   | PN           |
| CLK1      | 1.121236214    | 0.01885873773   | PN           |
| THOC1     | 1.006603965    | 0.01964208744   | MES          |
| ERN1      | 1.04968285     | 0.02331227598   | MES          |

| GBM from TCGA |      |       |              |
|---------------|------|-------|--------------|
| RBP           | diff | p.adj | up.regulated |
| MVP           | 1.12 | 0     | MES          |
| QKI           | 0.63 | 0     | PN           |
| POLR2D        | 0.28 | 0     | PN           |
| NOVA1         | 1.13 | 0     | PN           |
| TIA1          | 0.46 | 0     | PN           |
| RBM23         | 0.27 | 0     | PN           |
| CCNT2         | 0.35 | 0     | PN           |
| SFPQ          | 0.48 | 0     | PN           |
| ZNF326        | 0.27 | 0     | PN           |
| PTBP2         | 0.92 | 0     | PN           |
| LUC7L         | 0.44 | 0     | PN           |
| SRPK2         | 0.31 | 0     | PN           |
| SNRNP35       | 0.26 | 0     | PN           |
| FUS           | 0.37 | 0     | PN           |
| POLDIP3       | 0.4  | 0     | PN           |
| CLK1          | 0.46 | 0     | PN           |
| HNRNPA2B1     | 0.21 | 0.01  | PN           |
| CELF2         | 0.26 | 0.02  | PN           |
| UPF3A         | 0.26 | 0.03  | PN           |

|       |             |               |     |
|-------|-------------|---------------|-----|
| RBPMS | 2.56712388  | 0.02742119653 | PN  |
| THOC6 | 1.169586913 | 0.0339520237  | MES |

Supplementary Table 16: RNA Binding Protein (RBPs)-associated splicing events enriched in mesenchymal (MES) and preneural (PN) GSCs samples.

ASS (alternative 5' or 3' splice site): genomic coordinates of long and short exons (columns g.coord\_1 and g.coord\_2)

MXE (mutually exclusive exon): genomic coordinates of first and EScond exons (columns g.coord\_1 and g.coord\_2)

RI (retained introns): genomic coordinates of retained intron (column g.coord\_1)

ES (exon skipping): genomic coordinates of skipped exon (column g.coord\_1)

| MES        |           |        |                           |                           |                      |                |
|------------|-----------|--------|---------------------------|---------------------------|----------------------|----------------|
| event.type | RBP       | strand | g.coord_1                 | g.coord_2                 | inc.level.difference | FDR            |
| ES         | RBM5      | +      | chr3:50104247-50104308    | NA                        | 0.637                | 0              |
| ES         | RBM5      | +      | chr3:50110378-50110463    | NA                        | 0.247                | 0              |
| ES         | SNRNP70   | +      | chr19:49102113-49103587   | NA                        | 0.141                | 0              |
| ES         | QKI       | +      | chr6:163455278-16345421   | NA                        | 0.424                | 0              |
| ES         | HNRNPA2B1 | -      | chr7:26190992-26191128    | NA                        | 0.402                | 0              |
| ASS        | THOC2     | -      | chrX:123620374-123620965  | chrX:123620906-123620965  | 0.231                | 0              |
| ES         | DBR1      | -      | chr3:138163777-138163858  | NA                        | 0.426                | 0              |
| ES         | SON       | +      | chr21:33572550-33572630   | NA                        | 0.263                | 0              |
| ES         | PRPF40A   | -      | chr2:152679055-152679109  | NA                        | 0.309                | 0              |
| RI         | QKI       | +      | chr6:163563419-163570145  | NA                        | 0.602                | 3.34E-14       |
| ES         | CCAR2     | +      | chr8:22613016-22613136    | NA                        | 0.147                | 8.25E-14       |
| ES         | TIA1      | -      | chr2:70229058-70229091    | NA                        | 0.349                | 1.08E-13       |
| ES         | U2AF1L4   | -      | chr19:35744625-35744692   | NA                        | 0.725                | 9.67E-13       |
| ES         | EEF1D     | -      | chr8:143592646-143592893  | NA                        | 0.522                | 1.10E-11       |
| ES         | EEF1D     | -      | chr8:143592646-143592942  | NA                        | 0.497                | 1.12E-11       |
| ES         | ILF3      | +      | chr19:10684415-10684476   | NA                        | 0.323                | 1.34E-11       |
| ES         | U2AF1L4   | -      | chr19:35744625-35744738   | NA                        | 0.662                | 2.54E-11       |
| ES         | TIA1      | -      | chr2:70228343-70228462    | NA                        | 0.465                | 4.53E-11       |
| ES         | PPIL3     | -      | chr2:200882341-200882435  | NA                        | 0.454                | 5.63E-11       |
| ES         | NSUN2     | -      | chr5:6631872-6631977      | NA                        | 0.189                | 1.23E-10       |
| ES         | PUF60     | -      | chr8:143820665-143820716  | NA                        | 0.355                | 2.28E-10       |
| ES         | HNRNPD    | -      | chr4:82371527-82371584    | NA                        | 0.29                 | 3.90E-10       |
| ASS        | QKI       | +      | chr6:163564666-163570145  | chr6:163565945-163570145  | 0.545                | 3.14E-09       |
| ES         | LUC7L3    | +      | chr17:50738136-50738199   | NA                        | 0.274                | 3.31E-09       |
| ES         | HNRNPH1   | -      | chr5:179619268-179619360  | NA                        | 0.129                | 5.52E-09       |
| ES         | SRSF7     | -      | chr2:38748897-38749346    | NA                        | 0.118                | 8.21E-09       |
| MXE        | QKI       | +      | chr6:163534981-163535125  | chr6:163561981-163562069  | 0.124                | 1.07E-08       |
| ES         | EEF1D     | -      | chr8:143592646-143592893  | NA                        | 0.499                | 1.57E-08       |
| RI         | ARL6IP4   | +      | chr12:122981128-122981879 | NA                        | 0.401                | 1.61E-08       |
| ASS        | SNRPN     | +      | chr15:24974287-24974456   | chr15:24974310-24974456   | 0.392                | 2.09E-08       |
| ES         | THOC5     | -      | chr22:29550727-29550843   | NA                        | 0.218                | 2.53E-08       |
| ES         | PPWD1     | +      | chr5:65571838-65572286    | NA                        | 0.179                | 4.50E-08       |
| ES         | MBNL1     | +      | chr3:152456266-152456361  | NA                        | 0.13                 | 5.88E-08       |
| ES         | SF1       | -      | chr11:64771463-64771537   | NA                        | 0.208                | 1.08E-07       |
| ASS        | SFSWAP    | +      | chr12:131714070-131714240 | chr12:131714070-131714193 | 0.163                | 1.54E-07       |
| ASS        | TIA1      | -      | chr2:70216752-70216994    | chr2:70216885-70216994    | 0.191                | 1.98E-07       |
| ASS        | GEMIN8    | -      | chrX:14026051-14026221    | chrX:14026139-14026221    | 0.327                | 3.93E-07       |
| RI         | QKI       | +      | chr6:163563419-163570145  | NA                        | 0.403                | 4.78E-07       |
| ES         | ACO1      | +      | chr9:32386370-32386438    | NA                        | 0.159                | 9.98E-07       |
| ES         | PPIL3     | -      | chr2:200882341-200882382  | NA                        | 0.525                | 1.32E-06       |
| ES         | SREK1     | +      | chr5:66156064-66158932    | NA                        | 0.327                | 1.42E-06       |
| ES         | DDX50     | +      | chr10:68906225-68906337   | NA                        | 0.106                | 1.74E-06       |
| ES         | ZCCHC8    | -      | chr12:122490461-122490567 | NA                        | 0.176                | 1.79E-06       |
| MXE        | HNRNPH1   | -      | chr5:179620891-179621397  | chr5:179623036-179623164  | 0.114                | 2.46E-06       |
| MXE        | QKI       | +      | chr6:163534981-163535125  | chr6:163561981-163562069  | 0.124                | 2.92E-06       |
| MXE        | PPIL3     | -      | chr2:200882341-200882435  | chr2:200885261-200885343  | 0.104                | 3.05E-06       |
| ES         | EEF1D     | -      | chr8:143592646-143592797  | NA                        | 0.512                | 4.25E-06       |
| MXE        | LUC7L3    | +      | chr17:50737286-50737479   | chr17:50738136-50738199   | 0.106                | 4.40E-06       |
| ES         | ZNF326    | +      | chr1:90007611-90007750    | NA                        | 0.173                | 5.06E-06       |
| ES         | SRRM1     | +      | chr11:24663182-24663224   | NA                        | 0.254                | 5.46E-06       |
| MXE        | LUC7L3    | +      | chr17:50737286-50737479   | chr17:50738136-50738199   | 0.109                | 5.64E-06       |
| ES         | RBM23     | +      | chr14:22908332-22908380   | NA                        | 0.228                | 1.15E-05       |
| MXE        | PPIL3     | -      | chr2:200882341-200882435  | chr2:200885261-200885367  | 0.153                | 1.17E-05       |
| ES         | EEF1D     | -      | chr8:143590607-143590729  | NA                        | 0.51                 | 1.39E-05       |
| ASS        | QKI       | +      | chr6:163563419-163563719  | chr6:163563443-163563719  | 0.127                | 1.90E-05       |
| ES         | PPIL3     | -      | chr2:200885261-200885367  | NA                        | 0.339                | 1.93E-05       |
| ES         | EEF1D     | -      | chr8:143590607-143590735  | NA                        | 0.471                | 1.99E-05       |
| ASS        | HNRNPH1   | -      | chr5:179623594-179623671  | chr5:179623635-179623671  | 0.141                | 2.06E-05       |
| ES         | CACTIN    | -      | chr19:3611228-3611364     | NA                        | 0.444                | 2.72E-05       |
| ASS        | CLK4      | -      | chr5:178619837-178619896  | chr5:178619837-178619896  | 0.302                | 4.40E-05       |
| ES         | EEF1D     | -      | chr8:143590607-143590738  | NA                        | 0.346                | 5.02E-05       |
| ES         | SNRPN     | +      | chr15:24974641-24974957   | NA                        | 0.514                | 5.03E-05       |
| ES         | ZNF326    | +      | chr1:90007344-90007750    | NA                        | 0.107                | 6.21E-05       |
| MXE        | HNRNPD    | -      | chr4:82355303-82355401    | chr4:82356536-82356683    | 0.127                | 8.41E-05       |
| RI         | U2AF1L4   | -      | chr19:35744322-35744738   | NA                        | 0.397                | 9.78E-05       |
| RI         | PRPF31    | +      | chr19:54129056-54129370   | NA                        | 0.131                | 0.000126791982 |
| ASS        | CASC3     | +      | chr17:40167370-40167612   | chr17:40167497-40167612   | 0.116                | 0.000143821555 |
| RI         | PRPF4B    | +      | chr6:4056320-4057187      | NA                        | 0.118                | 0.000170267772 |
| ES         | PRPF4B    | +      | chr6:4062556-4062760      | NA                        | 0.163                | 0.000193544491 |
| ES         | SMG7      | +      | chr1:183547102-183547252  | NA                        | 0.216                | 0.000268228621 |
| MXE        | HNRNPH1   | -      | chr5:179621241-179621397  | chr5:179623036-179623164  | 0.106                | 0.000298680430 |
| ES         | CLK4      | -      | chr5:178619837-178619896  | NA                        | 0.17                 | 0.000432013183 |
| RI         | RBM5      | +      | chr3:50100531-50103166    | NA                        | 0.214                | 0.000549559422 |
| ES         | TRMU      | +      | chr22:46355989-46356072   | NA                        | 0.401                | 0.000653105210 |
| ES         | HNRNPA1   | +      | chr12:54281385-54281502   | NA                        | 0.112                | 0.000749873320 |
| ASS        | SART3     | -      | chr12:108544426-108544532 | chr12:108544426-108544478 | 0.142                | 0.000777512798 |
| ES         | PUF60     | -      | chr8:143827384-143827536  | NA                        | 0.128                | 0.000780430881 |
| ES         | EEF1D     | -      | chr8:143590644-143590738  | NA                        | 0.311                | 0.000791141303 |
| ES         | CLK4      | -      | chr5:178619837-178620673  | NA                        | 0.125                | 0.000805592955 |
| ES         | UPF3A     | +      | chr13:114286301-114286400 | NA                        | 0.217                | 0.000867862258 |
| ES         | SRSF6     | +      | chr20:43459152-43459420   | NA                        | 0.11                 | 0.000938808030 |
| ES         | PRPF40B   | +      | chr12:49632595-49632623   | NA                        | 0.329                | 0.001138009614 |
| MXE        | DEK       | -      | chr6:18258303-18258405    | chr6:18263842-18263996    | 0.121                | 0.001323759902 |
| ES         | EEF1D     | -      | chr8:143590644-143590735  | NA                        | 0.479                | 0.001367554607 |
| ES         | NSRP1     | +      | chr17:30118079-30118173   | NA                        | 0.239                | 0.002111221232 |
| ASS        | THOC2     | -      | chrX:123610917-123610963  | chrX:123610917-123610957  | 0.113                | 0.002286623134 |
| ES         | CPSF7     | -      | chr11:61420469-61420530   | NA                        | 0.111                | 0.002471171293 |
| ASS        | SECISBP2  | +      | chr9:89334521-89334730    | chr9:89334635-89334730    | 0.158                | 0.002486846193 |

| PN         |         |        |                           |                           |                      |                |
|------------|---------|--------|---------------------------|---------------------------|----------------------|----------------|
| event.type | RBP     | strand | g.coord_1                 | g.coord_2                 | inc.level.difference | FDR            |
| ASS        | QKI     | +      | chr6:163565945-163566795  | chr6:163566720-163566795  | -0.573               | 0              |
| ASS        | DAP3    | +      | chr1:155689090-155689243  | chr1:155689090-155689174  | -0.185               | 0              |
| RI         | TSEN2   | +      | chr3:12529761-12531659    | NA                        | -0.169               | 0              |
| RI         | CLK4    | -      | chr5:178616881-178618778  | NA                        | -0.481               | 1.16E-13       |
| RI         | SUGP2   | -      | chr19:18994365-18995280   | NA                        | -0.322               | 1.97E-13       |
| ASS        | ARL6IP4 | +      | chr12:122981570-122981879 | chr12:122981594-122981879 | -0.303               | 5.86E-13       |
| RI         | FUS     | +      | chr16:31184938-31188357   | NA                        | -0.141               | 6.33E-13       |
| ES         | PRPF4B  | +      | chr6:4056256-4056688      | NA                        | -0.255               | 6.63E-13       |
| ES         | NONO    | +      | chrX:71284983-71285097    | NA                        | -0.185               | 7.49E-12       |
| ES         | SNU13   | -      | chr22:41682355-41682587   | NA                        | -0.101               | 1.11E-11       |
| RI         | CLK1    | -      | chr2:200859679-200861466  | NA                        | -0.38                | 5.85E-11       |
| ES         | DHX9    | +      | chr1:18285576-182855713   | NA                        | -0.121               | 3.15E-10       |
| ASS        | ARL6IP4 | +      | chr12:122981570-122981879 | chr12:122981594-122981879 | -0.254               | 3.67E-10       |
| ES         | U2AF1L4 | -      | chr19:35744490-35744540   | NA                        | -0.55                | 1.56E-09       |
| ES         | UBTF    | -      | chr17:44208618-44209001   | NA                        | -0.104               | 6.26E-08       |
| ES         | RBM23   | -      | chr14:22905605-22905659   | NA                        | -0.136               | 6.52E-08       |
| RI         | HNRNPM  | +      | chr19:8465323-8465515     | NA                        | -0.161               | 7.93E-08       |
| RI         | CLK4    | -      | chr5:178617343-178618778  | NA                        | -0.336               | 9.82E-08       |
| ES         | RFXO2   | -      | chr22:35836319-35836439   | NA                        | -0.189               | 1.49E-07       |
| RI         | ILF3    | +      | chr19:10681218-10682192   | NA                        | -0.143               | 1.78E-07       |
| ES         | HNRNPD  | -      | chr4:82425562-82425667    | NA                        | -0.185               | 3.32E-07       |
| MXE        | EEF1D   | -      | chr8:143581228-143581328  | chr8:143586218-143586290  | -0.184               | 1.14E-06       |
| ES         | HNRNPD  | -      | chr4:82356536-82356683    | NA                        | -0.181               | 1.83E-06       |
| RI         | CLK3    | +      | chr15:74622119-74622560   | NA                        | -0.15                | 1.92E-06       |
| RI         | WDR83   | +      | chr19:12669754-12670080   | NA                        | -0.576               | 5.75E-06       |
| ES         | SNRPG   | -      | chr2:70289349-70289372    | NA                        | -0.177               | 8.30E-06       |
| ES         | LSM1    | -      | chr8:38169801-38169917    | NA                        | -0.102               | 2.05E-05       |
| ES         | ADARB1  | +      | chr21:45184473-45184593   | NA                        | -0.343               | 2.24E-05       |
| ES         | THOC5   | -      | chr22:29531077-29531110   | NA                        | -0.132               | 2.46E-05       |
| RI         | SRSF7   | -      | chr2:38748578-38749705    | NA                        | -0.138               | 2.58E-05       |
| ES         | UPF3A   | +      | chr13:114298839-114299000 | NA                        | -0.129               | 3.01E-05       |
| MXE        | QKI     | +      | chr6:163565278-163565421  | chr6:163534981-163535125  | -0.168               | 3.05E-05       |
| RI         | PRPF40B | +      | chr12:49631859-49632880   | NA                        | -0.355               | 4.01E-05       |
| ES         | HNRNPR  | -      | chr1:23340851-23341017    | NA                        | -0.125               | 4.88E-05       |
| RI         | PRPF4B  | +      | chr6:4060412-4061147      | NA                        | -0.11                | 4.91E-05       |
| ES         | HNRNPR  | -      | chr1:23340851-23341020    | NA                        | -0.127               | 6.33E-05       |
| ES         | PHF5A   | -      | chr2:4168019-41688147     | NA                        | -0.127               | 8.80E-05       |
| ASS        | PRPF38A | +      | chr1:52405679-52405839    | chr1:52405679-52405713    | -0.175               | 0.000108494166 |
| RI         | ZCCHC8  | -      | chr12:122483278-122483563 | NA                        | -0.216               | 0.000110570446 |
| MXE        | NSRP1   | +      | chr17:30118079-30118173   | chr17:30163066-30163162   | -0.106               | 0.000111351818 |
| RI         | DDX46   | +      | chr5:134816429-134817714  | NA                        | -0.105               | 0.000396894854 |
| MXE        | SUGP2   | -      | chr19:18995143-18995280   | chr19:19001612-19001674   | -0.153               | 0.000401558081 |
| ES         | RALY    | +      | chr20:34065043-34065160   | NA                        | -0.352               | 0.000541806568 |
| MXE        | HNRNPD  | -      | chr19:91305831-91305867   | NA                        | -0.111               | 0.000558909809 |
| MXE        | TRMT2B  | -      | chrX:101042041-101042312  | chrX:101051643-101051733  | -0.147               | 0.000818605483 |
| RI         | CCAR2   | +      | chr8:22619149-22620468    | NA                        | -0.169               | 0.001791555223 |
| RI         | ARL6IP4 | +      | chr12:122981128-122981879 | NA                        | -0.104               | 0.001961330751 |
| RI         | DDX39A  | +      | chr19:14409741-14410334   | NA                        | -0.119               | 0.002219711602 |
| RI         | ADARB1  | +      | chr21:45222017-45222650   | NA                        | -0.208               | 0.002719711602 |
| ASS        | CPSF7   | -      | chr11:61420469-61421608   | chr11:61421389-61421608   | -0.151               | 0.002518662501 |
| ES         | GFM2    | -      | chr5:74730259-74          |                           |                      |                |

|     |         |   |                           |                          |       |                |
|-----|---------|---|---------------------------|--------------------------|-------|----------------|
| ES  | RBM39   | - | chr20:35740524-35740597   | NA                       | 0.154 | 0.003153225159 |
| ASS | CPSF7   | - | chr11:61421053-61421130   | chr11:61421053-61421127  | 0.301 | 0.003195651006 |
| RI  | ARL6IP4 | + | chr12:122981128-122981879 | NA                       | 0.229 | 0.00421474628  |
| MXE | PPIL3   | - | chr2:200882341-200882382  | chr2:200885261-200885343 | 0.286 | 0.004322405941 |
| ES  | POLDIP3 | - | chr22:42601969-42602056   | NA                       | 0.229 | 0.005634242534 |
| RI  | UZAF1L4 | - | chr19:35744322-35745187   | NA                       | 0.282 | 0.005964038928 |
| MXE | POP4    | + | chr19:29610408-29610457   | chr19:29611861-29611939  | 0.229 | 0.007333098958 |
| ES  | POLDIP3 | - | chr22:42601969-42602107   | NA                       | 0.263 | 0.007773580358 |
| ES  | PRPF4B  | + | chr6:4062556-4062633      | NA                       | 0.151 | 0.007818435325 |
| ES  | TSEN2   | + | chr3:12516610-12516661    | NA                       | 0.173 | 0.007851399504 |
| ES  | PUF60   | - | chr8:143824312-143824396  | NA                       | 0.228 | 0.008185219315 |
| MXE | DBR1    | - | chr3:138163777-138163858  | chr3:138167080-138167305 | 0.171 | 0.01047188361  |
| MXE | CPSF7   | - | chr11:61421053-61421127   | chr11:61421191-61421257  | 0.378 | 0.01173911421  |
| MXE | MBNL1   | + | chr3:152455541-152455577  | chr3:152456266-152456361 | 0.163 | 0.01194955016  |
| ES  | THRAP3  | + | chr1:36225411-36225463    | NA                       | 0.218 | 0.01278202333  |
| ES  | TFIP11  | - | chr22:26511118-26511317   | NA                       | 0.127 | 0.0127859952   |
| ES  | EXOSC10 | - | chr1:11080498-11080514    | NA                       | 0.137 | 0.01358618517  |
| ES  | SREK1   | + | chr5:66158808-66158932    | NA                       | 0.212 | 0.01430870942  |
| ES  | RBM5    | + | chr3:50100531-50100605    | NA                       | 0.228 | 0.02074446813  |
| ES  | CCNT2   | + | chr2:134945786-134945982  | NA                       | 0.132 | 0.02298175873  |
| ES  | CELF1   | - | chr11:47500860-47500932   | NA                       | 0.237 | 0.02326580329  |
| ES  | TSEN2   | + | chr3:12505153-12505231    | NA                       | 0.135 | 0.02398359823  |
| ES  | RBMS1   | - | chr2:160282256-160282304  | NA                       | 0.217 | 0.02751345708  |
| ES  | ACIN1   | - | chr14:23089981-23090101   | NA                       | 0.233 | 0.02847082484  |
| MXE | PPIL3   | - | chr2:200882341-200882382  | chr2:200885261-200885367 | 0.277 | 0.03684497474  |
| ES  | PUF60   | - | chr8:143824312-143824399  | NA                       | 0.166 | 0.0374094293   |
| ES  | HNRNPL  | - | chr19:38841612-38841682   | NA                       | 0.156 | 0.03764037285  |
| ASS | PTBP2   | + | chr1:96804784-96804939    | chr1:96804799-96804939   | 0.389 | 0.03982276621  |
| MXE | CPSF7   | - | chr11:61421053-61421130   | chr11:61421191-61421257  | 0.32  | 0.0423514077   |
| ES  | ACIN1   | - | chr14:23071124-23071186   | NA                       | 0.194 | 0.04533534914  |
| ES  | TFIP11  | - | chr22:26511118-26511195   | NA                       | 0.144 | 0.04611867135  |



**Supplementary Table 17:** Differentially spliced/expressed RNA binding proteins (RBPs) in GSCs with splice-site-creating mutations reported at Jayasinghe et al.

| RBP    | GSCs     |           | Mutations Jayasinghe <i>et al.</i> |        |                               |            |           |              |                       |        |
|--------|----------|-----------|------------------------------------|--------|-------------------------------|------------|-----------|--------------|-----------------------|--------|
|        | Mesenchy | AS.events | Exon                               | Intron | Site                          | Chromosome | Position  | MutationType | NovelJunctionPosition | Cancer |
| ACIN1  | ----     | MES       | 14/19                              | .      | TCGA-D1-A2G0_14_23532257_G_A  | 14         | 23532257  | Missense     | 23532247              | UCEC   |
|        |          |           | 12/19                              | .      | TCGA-CF-A27C_14_23533388_C_G  | 14         | 23533388  | Missense     | 23533386              | BLCA   |
| DDX46  | ----     | PN        | 18/23                              | .      | TCGA-YG-AA3O_5_134147386_G_A  | 5          | 134147386 | Missense     | 134147388             | SKCM   |
| DHX38  | up       | ----      | .                                  | 15/26  | TCGA-DG-A2KM_16_72138925_G_C  | 16         | 72138925  | Splice Site  | 72138934              | CESC   |
| GEMIN8 | ----     | MES       | 5/5                                | .      | TCGA-BF-AAP1_X_14027019_C_T   | X          | 14027019  | Other        | 14027017              | SKCM   |
|        |          |           | .                                  | 4/4    | TCGA-G3-A7M6_X_14027290_T_A   | X          | 14027290  | Splice Site  | 14027281              | LIHC   |
| HNRNPL | ----     | MES       | .                                  | 9/12   | TCGA-CV-A45Q_19_39329240_T_C  | 19         | 39329240  | Splice Site  | 39329226              | HNSC   |
| LUC7L  | down     | ----      | 6/10                               | .      | TCGA-ZF-A9R7_16_249172_G_T    | 16         | 249172    | Silent       | 249174                | BLCA   |
| NONO   | ----     | PN        | 3/12                               | .      | TCGA-YC-A9TC_X_70510515_G_C   | X          | 70510515  | Missense     | 70510517              | BLCA   |
| RBFOX2 | ----     | PN        | .                                  | 2/13   | TCGA-34-5241_22_36236390_T_C  | 22         | 36236390  | Other        | 36236394              | LUSC   |
| RBM39  | ----     | MES       | .                                  | 2/16   | TCGA-34-A5IX_20_34328745_C_A  | 20         | 34328745  | Splice Site  | 34328727              | LUSC   |
| RBM5   | ----     | MES       | .                                  | 13/24  | TCGA-50-5068_3_50145581_G_A   | 3          | 50145581  | Splice Site  | 50145585              | LUAD   |
|        |          |           | .                                  | 3/24   | TCGA-UY-A78L_3_50131152_G_A   | 3          | 50131152  | Splice Site  | 50131154              | BLCA   |
| SCAF4  | down     | ----      | .                                  | 7/19   | TCGA-G2-A3IE_21_33069064_C_T  | 21         | 33069064  | Splice Site  | 33069061              | BLCA   |
| SMG7   | ----     | MES       | .                                  | 18/22  | TCGA-D5-6924_1_183518342_G_A  | 1          | 183518342 | Splice Site  | 183518360             | COAD   |
|        |          |           | 9/23                               | .      | TCGA-EE-A2GM_1_183502377_C_T  | 1          | 183502377 | Missense     | 183502390             | SKCM   |
| SRRM1  | ----     | MES       | 9/17                               | 8/16   | TCGA-BR-8686_1_24981344_AGA_- | 1          | 24981344  | Splice Site  | 24981348              | STAD   |
| SRSF6  | down     | MES       | .                                  | 5/5    | TCGA-85-A4JC_20_42089342_G_T  | 20         | 42089342  | Splice Site  | 42089348              | LUSC   |
| THOC5  | ----     | MES & PN  | .                                  | 4/19   | TCGA-22-5472_22_29938946_C_A  | 22         | 29938946  | Splice Site  | 29938937              | LUSC   |
| THRAP3 | ----     | MES       | 5/12                               | .      | TCGA-J2-A4AD_1_36755327_C_A   | 1          | 36755327  | Silent       | 36755325              | LUAD   |
| UBTF   | ----     | PN        | .                                  | 10/20  | TCGA-P3-A6T5_17_42288700_C_G  | 17         | 42288700  | Splice Site  | 42288694              | HNSC   |
|        |          |           | 20/21                              | .      | TCGA-AJ-A8CT_17_42284837_G_A  | 17         | 42284837  | Silent       | 42284838              | UCEC   |
| ZNF326 | down     | MES       | 8/12                               | .      | TCGA-FS-A1Z0_1_90483007_T_G   | 1          | 90483007  | Missense     | 90483003              | SKCM   |

Supplementary Table 18: Differentially spliced/expressed RBPs in GSCs frequently mutated according to Seiler *et al.*

| RBP     | GSCs        |           | Mutations Seiler et al.                                                                                                                             |                                                                                                   |                                                                                                                    |                                                                                                                                                           | tcga.cohort |
|---------|-------------|-----------|-----------------------------------------------------------------------------------------------------------------------------------------------------|---------------------------------------------------------------------------------------------------|--------------------------------------------------------------------------------------------------------------------|-----------------------------------------------------------------------------------------------------------------------------------------------------------|-------------|
|         | Mesenchymal | AS.events | percentage.non.silent.mutation                                                                                                                      | percentage.hotspot                                                                                | percentage.LoF                                                                                                     |                                                                                                                                                           |             |
| CLK4    | down        | MES & PN  | 1.14, 0.43, 0.9, 0.95, 0.94, 0.17, 0.35, 0.35, 1.72, 0.35, 1.21, 0.68, 0.14, 0.31, 0.43, 0.61, 0.58, 0.32, 0.95, 1, 3.19                            | 40, 20, 0, 0, 0, 0, 0, 0, 0, 0, 50, 0, 25, 0, 50, 100, 16, 0, 0, 20, 20, 16.67                    | 0, 40, 0, 40, 0, 100, 0, 0, 60, 50, 0, 0, 0, 50, 0, 22.67, 0, 0, 40, 20, 22.22                                     | BLCA, BRCA, CESC, COAD, ESCA, <b>GBM</b> , HNSC, KIRC, KIRP, LGG, LIHC, LUAD, LUSC, OV, PAAD, pancan, READ, SARC, SKCM, STAD, UCEC                        |             |
| DDX50   | ---         | MES       | 1.09, 1.14, 0.43, 0.6, 1.53, 1.42, 0.17, 0.18, 1.77, 0.71, 0.69, 0.5, 0.17, 1.7, 2.05, 0.29, 0.16, 0.43, 0.98, 0.59, 1.75, 1.13, 2.59, 6.38         | 0, 0, 0, 0, 12.5, 0, 0, 0, 0, 0, 0, 0, 0, 0, 0, 0, 6.67, 0, 33.33, 0, 0, 16.67                    | 100, 20, 20, 0, 37.5, 0, 100, 0, 0, 16.67, 50, 0, 100, 30, 0, 66.67, 0, 46.15, 41.67                               | ACC, BLCA, BRCA, CESC, COAD, ESCA, <b>GBM</b> , HNSC, KICH, KIRC, KIRP, LAML, LGG, LIHC, LUAD, LUSC, OV, PAAD, pancan, PRAD, READ, SKCM, STAD, UCEC       |             |
| DHX9    | ---         | PN        | 4.34, 1.04, 2.1, 1.96, 3.82, 1.89, 0.33, 0.88, 0.53, 1.37, 0.35, 2.91, 2.56, 1.15, 0.47, 0.43, 1.73, 2.34, 3.4, 2.99, 9.57, 3.51                    | 0, 0, 14.29, 0, 15, 0, 0, 0, 0, 0, 50, 0, 0, 0, 0, 0, 0, 5.69, 0, 5.56, 6.67, 9.26, 0             | 10.53, 8.33, 0, 0, 30, 25, 50, 0, 33.33, 0, 0, 16.67, 6.67, 12.5, 33.33, 100, 21.33, 0, 11.11, 40, 35.19, 0        | BLCA, BRCA, CESC, CHOL, COAD, ESCA, <b>GBM</b> , HNSC, KIRC, KIRP, LGG, LIHC, LUAD, LUSC, OV, PAAD, pancan, READ, SKCM, STAD, UCEC, UCS                   |             |
| HNRNPD  | ---         | MES & PN  | 0.91, 0.17, 0.3, 1.15, 1.79, 0.47, 0.88, 0.18, 0.34, 0.17, 0.24, 0.51, 0.43, 0.57, 0.2, 0.64, 1.13, 0.4, 0.19, 4.43, 1.75                           | 0, 0, 0, 0, 0, 0, 0, 0, 0, 0, 0, 0, 0, 0, 0, 0, 0, 0, 0, 0, 0, 0                                  | 50, 50, 100, 0, 50, 0, 40, 0, 0, 100, 100, 33.33, 66.67, 33.33, 100, 0, 0, 0, 0, 40, 0                             | BLCA, BRCA, CESC, COAD, DLBC, ESCA, HNSC, KIRC, KIRP, LGG, LIHC, LUAD, LUSC, pancan, PRAD, SARC, SKCM, STAD, THCA, UCEC, UCS                              |             |
| HNRNPD  | ---         | PN        | 1.09, 1.37, 0.35, 0.9, 2.48, 0.47, 0.83, 0.88, 0.18, 0.69, 0.5, 0.17, 0.17, 0.72, 0.16, 0.67, 0.2, 0.58, 0.32, 0.38, 1.8, 0.38, 2.84                | 0, 0, 0, 0, 0, 0, 0, 20, 0, 0, 0, 0, 0, 20, 0, 3.66, 0, 0, 0, 0, 0, 6.25                          | 0, 0, 50, 33.33, 46.15, 0, 20, 60, 0, 0, 0, 100, 100, 0, 100, 32.93, 0, 0, 0, 100, 55.56, 0, 25                    | ACC, BLCA, BRCA, CESC, COAD, ESCA, <b>GBM</b> , HNSC, KIRC, KIRP, LAML, LGG, LUAD, LUSC, OV, pancan, PRAD, READ, SARC, SKCM, STAD, THCA, UCEC             |             |
| HNRNPH3 | ---         | PN        | 0.68, 0.43, 0.95, 0.47, 0.33, 0.18, 0.34, 0.5, 0.17, 0.58, 0.43, 0.45, 0.39, 0.58, 1.32, 1, 2.66                                                    | 0, 0, 0, 0, 0, 0, 0, 0, 0, 0, 25, 0, 7.27, 0, 0, 0, 0, 0, 0, 0, 0, 0, 0                           | 0, 20, 20, 100, 0, 0, 0, 0, 100, 0, 25, 0, 16.36, 0, 0, 28.57, 0, 13.33                                            | BLCA, BRCA, COAD, ESCA, <b>GBM</b> , HNSC, KIRP, LAML, LUAD, LUSC, PAAD, pancan, PRAD, READ, SKCM, STAD, UCEC                                             |             |
| HNRNPL  | ---         | MES       | 0.68, 0.35, 0.6, 4.01, 0.47, 0.33, 1.23, 0.18, 0.17, 0.73, 0.43, 0.31, 0.75, 1.17, 2.46, 1.4, 3.55                                                  | 0, 0, 0, 4.76, 0, 50, 0, 0, 0, 0, 0, 0, 0, 0, 3.26, 0, 0, 14.29, 0                                | 33.33, 25, 50, 57.14, 100, 0, 42.86, 0, 0, 33.33, 0, 50, 31.52, 50, 7.69, 14.29, 25                                | BLCA, BRCA, CESC, COAD, ESCA, <b>GBM</b> , HNSC, KIRC, LGG, LIHC, LUSC, OV, pancan, READ, SKCM, STAD, UCEC                                                |             |
| NOVA1   | down        | ---       | 1.09, 0.91, 0.17, 0.9, 3.63, 0.89, 0.94, 0.7, 0.34, 0.17, 1.46, 3.76, 2.16, 0.31, 0.43, 1.47, 0.39, 2.92, 0.32, 6.05, 2.79, 0.81, 6.91, 1.75        | 0, 0, 50, 0, 0, 0, 0, 0, 0, 0, 0, 0, 13.64, 13.33, 0, 0, 9.5, 0, 20, 100, 6.25, 28.57, 0, 7.69, 0 | 0, 0, 0, 0, 52.63, 0, 0, 0, 0, 100, 33.33, 13.64, 6.67, 0, 100, 21.23, 0, 0, 0, 21.88, 14.29, 0, 28.21, 0          | ACC, BLCA, BRCA, CESC, COAD, DLBC, ESCA, HNSC, KIRP, LGG, LIHC, LUAD, LUSC, OV, PAAD, pancan, PRAD, READ, SARC, SKCM, STAD, THYM, UCEC, UCS               |             |
| NSRP1   | ---         | MES & PN  | 0.68, 0.26, 0.6, 1.53, 0.33, 0.53, 0.34, 0.73, 1.03, 0.29, 0.31, 0.63, 0.2, 0.58, 0.32, 1.89, 1.2, 4.08                                             | 0, 0, 0, 0, 0, 0, 0, 0, 0, 0, 0, 0, 0, 0, 0, 0, 0, 0, 0, 0, 0, 0                                  | 33.33, 0, 0, 37.5, 0, 0, 0, 66.67, 0, 0, 18.18, 0, 0, 0, 0, 33.33, 26.09                                           | BLCA, BRCA, CESC, COAD, <b>GBM</b> , HNSC, KIRP, LIHC, LUAD, LUSC, OV, pancan, PRAD, READ, SARC, SKCM, STAD, UCEC                                         |             |
| PABPC1  | up          | ---       | 1.09, 1.6, 0.26, 0.3, 2.29, 1.79, 0.47, 0.18, 0.35, 0.35, 0.24, 0.85, 0.86, 0.31, 0.72, 0.58, 0.32, 2.08, 1, 0.19, 3.9, 1.75                        | 0, 0, 0, 100, 16.67, 0, 0, 0, 0, 50, 0, 0, 0, 0, 0, 0, 17.05, 100, 0, 9.09, 0, 0, 40.91, 0        | 0, 14.29, 0, 0, 16.67, 100, 0, 0, 0, 50, 0, 0, 0, 12.5, 100, 0, 0, 0, 0, 18.18, 0                                  | ACC, BLCA, BRCA, CESC, COAD, DLBC, ESCA, HNSC, KIRC, LGG, LIHC, LUAD, LUSC, OV, pancan, READ, SARC, SKCM, STAD, THCA, UCEC, UCS                           |             |
| PHF5A   | ---         | PN        | 0.23, 0.17, 0.35, 0.88, 0.35, 0.35, 0.43, 0.16, 0.2, 0.57, 0.4, 0.18                                                                                | 0, 100, 0, 100, 0, 100, 66.67, 47.37, 0, 66.67, 50, 0                                             | 0, 0, 50, 0, 0, 0, 33.33, 10.53, 0, 0, 0, 0                                                                        | BLCA, <b>GBM</b> , HNSC, KICH, KIRC, LGG, LUSC, pancan, PRAD, SKCM, STAD, UCEC                                                                            |             |
| PRPF40B | ---         | MES & PN  | 0.91, 0.43, 1.2, 2.86, 0.94, 1.16, 1.58, 0.88, 0.53, 0.69, 0.52, 1.71, 0.86, 0.16, 1.17, 0.2, 2.92, 0.32, 3.21, 2.99, 5.67                          | 0, 0, 0, 6.67, 0, 0, 0, 0, 33.33, 0, 0, 0, 10, 16.67, 0, 6.29, 100, 0, 0, 0, 0, 12.5              | 0, 20, 50, 26.67, 0, 14.29, 11.11, 0, 0, 0, 0, 10, 33.33, 0, 16.08, 0, 0, 100, 0, 33.33, 15.62                     | BLCA, BRCA, CESC, COAD, ESCA, <b>GBM</b> , HNSC, KICH, KIRC, KIRP, LGG, LUAD, LUSC, OV, pancan, PRAD, READ, SARC, SKCM, STAD, UCEC                        |             |
| PRPF4B  | ---         | MES & PN  | 1.09, 1.83, 1.04, 0.9, 2.67, 0.47, 0.33, 1.23, 0.35, 1.37, 0.35, 0.73, 1.88, 0.86, 1.14, 0.47, 1.26, 0.59, 0.58, 0.64, 3.02, 2.79, 0.38, 6.21, 1.75 | 0, 0, 8.33, 0, 0, 0, 0, 14.29, 0, 0, 0, 0, 0, 0, 33.33, 1.95, 0, 0, 0, 0, 0, 0, 0, 0, 0           | 100, 25, 0, 33.33, 50, 100, 50, 0, 0, 25, 50, 33.33, 9.09, 0, 0, 33.33, 27.27, 0, 100, 0, 6.25, 78.57, 0, 31.43, 0 | ACC, BLCA, BRCA, CESC, COAD, ESCA, <b>GBM</b> , HNSC, KIRC, KIRP, LGG, LIHC, LUAD, LUSC, MESO, OV, pancan, PRAD, READ, SARC, SKCM, STAD, THCA, UCEC, UCS  |             |
| QKI     | down        | MES & PN  | 1.09, 0.68, 0.17, 0.3, 1.53, 1.16, 0.88, 0.69, 0.5, 0.17, 0.68, 0.72, 0.43, 0.74, 0.39, 0.58, 0.32, 1.89, 2.59, 3.72, 1.25                          | 0, 0, 0, 0, 0, 0, 20, 0, 0, 0, 0, 0, 0, 4.44, 0, 100, 0, 0, 7.69, 4.76, 0                         | 0, 33.33, 50, 0, 50, 57.14, 0, 0, 0, 0, 20, 0, 42.22, 50, 0, 0, 60, 61.54, 52.38, 100                              | ACC, BLCA, BRCA, CESC, COAD, <b>GBM</b> , HNSC, KIRP, LAML, LGG, LUAD, LUSC, PAAD, pancan, PRAD, READ, SARC, SKCM, STAD, UCEC, UVM                        |             |
| RBM25   | ---         | PN        | 1.83, 0.86, 2.1, 1.96, 2.1, 0.47, 0.5, 0.53, 0.88, 0.18, 0.69, 0.24, 0.85, 1.3, 0.31, 0.43, 1.22, 0.39, 2.34, 0.32, 3.78, 2.4, 0.67, 7.09, 1.75     | 12.5, 10, 14.29, 0, 0, 0, 0, 0, 100, 0, 0, 0, 0, 0, 50, 0, 16.78, 50, 0, 0, 5, 41.67, 0, 32.5, 0  | 12.5, 10, 0, 0, 9.09, 0, 33.33, 33.33, 0, 0, 25, 0, 0, 22.22, 50, 0, 12.75, 0, 0, 100, 0, 8.33, 0, 20, 0           | BLCA, BRCA, CESC, CHOL, COAD, ESCA, <b>GBM</b> , HNSC, KICH, KIRC, LGG, LIHC, LUAD, LUSC, OV, PAAD, pancan, PRAD, READ, SARC, SKCM, STAD, TGCT, UCEC, UCS |             |
| SF1     | ---         | MES       | 2.28, 0.35, 1.8, 2.1, 0.47, 0.5, 0.88, 0.35, 0.73, 2.56, 0.58, 0.31, 0.43, 0.95, 0.2, 0.58, 0.64, 2.08, 2.59, 3.72                                  | 40, 25, 50, 9.09, 0, 33.33, 20, 0, 0, 13.33, 0, 50, 0, 19.83, 0, 0, 0, 23.08, 28.57               | 0, 0, 16.67, 27.27, 100, 0, 60, 0, 0, 26.67, 0, 0, 100, 16.38, 100, 0, 0, 0, 23.08, 9.52                           | BLCA, BRCA, CESC, COAD, ESCA, <b>GBM</b> , HNSC, LGG, LIHC, LUAD, LUSC, OV, PAAD, pancan, PRAD, READ, SARC, SKCM, STAD, UCEC                              |             |
| SNRNP35 | down        | ---       | 1.09, 0.46, 0.26, 1.15, 0.47, 0.17, 0.35, 0.34, 0.17, 0.14, 0.43, 0.37, 0.58, 0.38, 0.6, 0.19, 0.81, 3.01                                           | 0, 0, 0, 0, 0, 0, 0, 0, 0, 0, 0, 0, 0, 0, 0, 0, 0, 0, 0, 0, 0, 0                                  | 0, 0, 66.67, 33.33, 100, 0, 0, 0, 0, 26.67, 0, 0, 66.67, 0, 0, 29.41                                               | ACC, BLCA, BRCA, COAD, ESCA, <b>GBM</b> , HNSC, KIRP, LGG, LUSC, PAAD, pancan, READ, SKCM, STAD, THCA, THYM, UCEC                                         |             |
| SNRPN   | ---         | MES       | 1.09, 0.91, 0.26, 0.3, 1.53, 0.89, 1.42, 1.05, 0.35, 0.17, 0.49, 2.39, 1.44, 0.31, 0.43, 0.84, 0.58, 3.02, 2.2, 2.84                                | 0, 25, 33.33, 100, 50, 0, 33.33, 16.67, 0, 0, 50, 14.29, 10, 0, 0, 20.39, 0, 12.5, 45.45, 6.25    | 0, 0, 33.33, 0, 12.5, 0, 0, 33.33, 0, 0, 0, 20, 0, 0, 8.74, 0, 6.25, 0, 12.5                                       | ACC, BLCA, BRCA, CESC, COAD, DLBC, ESCA, HNSC, KIRC, LGG, LIHC, LUAD, LUSC, OV, PAAD, pancan, READ, SKCM, STAD, UCEC                                      |             |

|               |      |          |                                                                                                                                                          |                                                                                                            |                                                                                                                                     |                                                                                                                                                                |
|---------------|------|----------|----------------------------------------------------------------------------------------------------------------------------------------------------------|------------------------------------------------------------------------------------------------------------|-------------------------------------------------------------------------------------------------------------------------------------|----------------------------------------------------------------------------------------------------------------------------------------------------------------|
| <b>THOC5</b>  | ---- | MES & PN | 2.05, 0.26, 0.9, 1.96, 2.48, 0.89, 0.35,<br>0.18, 0.34, 0.35, 0.49, 0.34, 1.15,<br>0.47, 1.3, 0.83, 0.39, 0.58, 0.32, 2.08,<br>1, 0.67, 0.38, 4.08, 1.75 | 0, 33.33, 0, 0, 15.38, 0,<br>0, 0, 0, 0, 0, 0, 0, 0,<br>5.94, 0, 0, 0, 0, 0, 0,<br>13.04, 0                | 11.11, 33.33, 33.33, 0, 7.69,<br>0, 0, 100, 0, 0, 0, 0, 25, 0, 0,<br>12.87, 50, 0, 0, 18.18, 0,<br>100, 0, 8.7, 0                   | BLCA, BRCA, CESC, CHOL, COAD, DLBC,<br>HNSC, KIRC, KIRP, LGG, LIHC, LUAD,<br>LUSC, OV, PAAD, pancan, PRAD, READ,<br>SARC, SKCM, STAD, TGCT, THCA, UCEC,<br>UCS |
| <b>THOC6</b>  | up   | ---      | 0.46, 0.3, 0.57, 0.17, 0.35, 0.18, 0.35,<br>0.24, 1.03, 0.47, 0.43, 0.48, 0.2, 0.32,<br>1.32, 0.6, 4.08                                                  | 0, 100, 0, 0, 0, 0, 0, 0,<br>0, 0, 0, 12.07, 0, 0, 0, 0,<br>26.09                                          | 0, 0, 0, 0, 0, 0, 0, 0, 0, 0,<br>6.9, 0, 0, 28.57, 33.33, 4.35                                                                      | BLCA, CESC, COAD, <b>GBM</b> , HNSC, KIRC,<br>LGG, LIHC, LUAD, OV, PAAD, pancan,<br>PRAD, SARC, SKCM, STAD, UCEC                                               |
| <b>THRAP3</b> | ---- | MES      | 3.88, 0.78, 1.5, 1.96, 2.67, 0.33, 0.7,<br>0.35, 0.69, 1.49, 0.52, 0.49, 1.88,<br>1.15, 1.14, 1.09, 0.87, 1.48, 0.39,<br>2.34, 0.32, 4.73, 3.39, 6.91    | 0, 0, 20, 0, 21.43, 50, 0,<br>0, 50, 33.33, 0, 0, 0, 0,<br>0, 0, 0, 11.05, 0, 0, 0, 8,<br>23.53, 17.95     | 41.18, 0, 40, 100, 21.43, 50,<br>25, 50, 50, 33.33, 0, 50,<br>18.18, 37.5, 100, 28.57, 0,<br>28.73, 50, 0, 100, 28, 41.18,<br>23.08 | BLCA, BRCA, CESC, CHOL, COAD, <b>GBM</b> ,<br>HNSC, KIRC, KIRP, LAML, LGG, LIHC,<br>LUAD, LUSC, MESO, OV, PAAD, pancan,<br>PRAD, READ, SARC, SKCM, STAD, UCEC  |
| <b>TIA1</b>   | down | MES      | 0.23, 0.52, 0.3, 1.15, 0.47, 0.5, 0.18,<br>0.18, 0.17, 0.17, 1.3, 0.48, 0.2, 0.58,<br>0.32, 1.51, 1, 1.95, 1.75                                          | 0, 0, 0, 0, 0, 0, 0, 0, 0,<br>0, 0, 0, 0, 0, 0, 0, 0, 0,<br>0, 0, 0, 0, 0, 0, 0, 0, 0                      | 0, 33.33, 100, 66.67, 0,<br>66.67, 100, 0, 100, 0, 0,<br>30.51, 0, 0, 100, 37.5, 40,<br>9.09, 0                                     | BLCA, BRCA, CESC, COAD, ESCA, <b>GBM</b> ,<br>HNSC, KIRC, LGG, LUAD, LUSC, pancan,<br>PRAD, READ, SARC, SKCM, STAD, UCEC,<br>UCS                               |
| <b>U2AF1</b>  | down | ---      | 1.09, 1.83, 0.17, 0.6, 0.76, 0.17, 0.35,<br>0.03, 0.35, 2.22, 0.14, 0.16, 1.3, 0.63,<br>0.2, 0.58, 0.95, 1, 0.19, 3.01, 3.51                             | 100, 12.5, 0, 100, 0, 0,<br>50, 0.86, 0, 92.31, 0, 0,<br>100, 48.05, 100, 0, 0, 0,<br>100, 52.94, 100      | 0, 0, 0, 0, 0, 0, 0, 0, 0, 0,<br>0, 0, 1.3, 0, 0, 0, 20, 0, 0, 0                                                                    | ACC, BLCA, BRCA, CESC, COAD, <b>GBM</b> ,<br>HNSC, LAML, LGG, LUAD, LUSC, OV, PAAD,<br>pancan, PRAD, READ, SKCM, STAD, THCA,<br>UCEC, UCS                      |
| <b>ZCCHC8</b> | ---- | MES & PN | 1.09, 2.74, 0.6, 1.8, 1.96, 1.72, 1.79,<br>0.94, 0.7, 0.88, 0.35, 0.34, 0.17, 0.24,<br>1.2, 0.58, 0.16, 0.43, 0.9, 1.75, 0.64,<br>1.32, 1.4, 0.19, 4.79  | 0, 16.67, 0, 0, 0, 0, 0, 0,<br>25, 0, 0, 0, 0, 0, 14.29,<br>25, 0, 0, 8.18, 0, 0,<br>14.29, 14.29, 0, 7.41 | 0, 8.33, 14.29, 0, 0, 11.11,<br>0, 0, 0, 0, 0, 100, 0, 100,<br>28.57, 0, 100, 0, 18.18, 0, 0,<br>14.29, 14.29, 0, 37.04             | ACC, BLCA, BRCA, CESC, CHOL, COAD,<br>DLBC, ESCA, HNSC, KICH, KIRC, KIRP,<br>LGG, LIHC, LUAD, LUSC, OV, PAAD,<br>pancan, READ, SARC, SKCM, STAD, THCA,<br>UCEC |

**Supplementary Table 19:** Differentially expressed lncRNAs between mesenchymal (MES) and proneural (PN) GSCs samples.

| Up-regulated lncRNAs in MES (down-regulated in PN) |                |          |
|----------------------------------------------------|----------------|----------|
| lncRNA                                             | log2FoldChange | FDR      |
| ADIRF-AS1                                          | 8.146945972    | 3.93E-36 |
| RP11-169F17.1                                      | 9.033911847    | 1.37E-30 |
| HCG11                                              | 6.647723412    | 3.53E-25 |
| MIR222HG                                           | 4.064738431    | 3.46E-23 |
| RP11-66B24.7                                       | 8.978200339    | 8.13E-23 |
| LINC00960                                          | 10.26330846    | 2.66E-19 |
| RP11-420A23.1                                      | 3.684649121    | 4.13E-19 |
| LINC00470                                          | 10.06050549    | 1.29E-18 |
| LINC01123                                          | 7.706435703    | 1.45E-18 |
| LINC01436                                          | 9.962790407    | 3.64E-18 |
| LINC00707                                          | 8.816289946    | 5.03E-18 |
| CTC-459F4.3                                        | 2.972995332    | 7.19E-18 |
| AC005301.9                                         | 10.40930029    | 1.21E-17 |
| RP11-30P6.6                                        | 5.681131516    | 2.14E-17 |
| AC003092.1                                         | 10.50044544    | 3.23E-17 |
| LINC00857                                          | 8.351658274    | 5.01E-17 |
| RP5-884M6.1                                        | 9.72557049     | 8.11E-17 |
| RP11-366H4.1                                       | 10.03231099    | 3.19E-16 |
| FAM201A                                            | 9.935176618    | 5.54E-16 |
| LINC01249                                          | 9.35697513     | 5.98E-16 |
| RP11-497G19.1                                      | 7.366430786    | 7.63E-16 |
| RP11-108M9.4                                       | 6.808368938    | 8.17E-16 |
| UBR5-AS1                                           | 3.568858858    | 1.20E-15 |
| RP11-575F12.3                                      | 7.440012405    | 1.80E-15 |
| LINC00944                                          | 9.821144795    | 2.02E-15 |
| RP11-148B18.4                                      | 9.230758474    | 2.71E-15 |
| LINC01139                                          | 9.226548995    | 3.83E-15 |
| MSC-AS1                                            | 7.978350409    | 5.06E-15 |
| LINC01605                                          | 7.765975334    | 1.00E-14 |
| CASC9                                              | 9.550356712    | 1.20E-14 |
| RP11-66B24.2                                       | 9.683498973    | 1.23E-14 |
| CTB-140J7.2                                        | 9.055864721    | 1.87E-14 |
| MIR137HG                                           | 9.463462249    | 2.91E-14 |
| RP4-647C14.2                                       | 9.440803875    | 3.12E-14 |
| LINC00910                                          | 4.052061325    | 4.78E-14 |
| TRHDE-AS1                                          | 9.426571735    | 5.89E-14 |
| RP11-129M6.1                                       | 9.283071256    | 1.02E-13 |
| PCAT7                                              | 7.012366968    | 1.83E-13 |
| RP11-390F4.3                                       | 4.822466039    | 6.69E-13 |
| LINC01533                                          | 9.351719175    | 6.69E-13 |
| LINC00662                                          | 2.658992173    | 1.17E-12 |
| RP11-262H14.3                                      | 4.33804083     | 1.57E-12 |

| Down-regulated lncRNAs in MES (up-regulated in PN) |                |          |
|----------------------------------------------------|----------------|----------|
| lncRNA                                             | log2FoldChange | FDR      |
| XIST                                               | -10.22135421   | 1.92E-94 |
| SOX2-OT                                            | -9.101572388   | 5.55E-43 |
| LINC00511                                          | -4.72758947    | 8.94E-35 |
| LINC00665                                          | -6.508442983   | 2.47E-32 |
| LINC00461                                          | -4.071773964   | 3.20E-25 |
| MIR34AHG                                           | -7.151118111   | 2.77E-21 |
| RP11-196G18.22                                     | -9.157734844   | 1.05E-20 |
| AC074289.1                                         | -6.611724699   | 5.13E-20 |
| LINC01963                                          | -5.64863106    | 1.60E-17 |
| AC018647.3                                         | -10.62948487   | 1.29E-16 |
| HAGLR                                              | -10.37607784   | 1.88E-16 |
| SOX21-AS1                                          | -10.67844791   | 4.24E-16 |
| RP11-288C18.1                                      | -3.662952762   | 5.00E-16 |
| RP11-210M15.2                                      | -7.961094847   | 2.74E-15 |
| MEG3                                               | -9.884091578   | 3.89E-15 |
| RP11-566E18.1                                      | -6.093151216   | 3.97E-15 |
| RP11-161M6.2                                       | -9.861994023   | 4.74E-15 |
| ZNF528-AS1                                         | -10.33612284   | 2.16E-14 |
| RP11-275H4.1                                       | -9.076431963   | 3.29E-14 |
| CTD-2353F22.2                                      | -4.084734896   | 1.33E-13 |
| LINC01896                                          | -8.717255997   | 5.77E-13 |
| AF131215.2                                         | -9.011129608   | 6.69E-13 |
| CASC15                                             | -9.336123802   | 1.20E-12 |
| RP3-525N10.2                                       | -6.660068513   | 1.23E-12 |
| RP11-119F7.5                                       | -8.593043845   | 1.63E-12 |
| RP11-629G13.1                                      | -8.379396214   | 1.00E-11 |
| RP11-403A3.3                                       | -9.883416675   | 1.05E-11 |
| MIR99AHG                                           | -3.934916524   | 1.08E-11 |
| AC108142.1                                         | -8.919909338   | 1.48E-11 |
| AC005154.6                                         | -2.818045991   | 1.77E-11 |
| LINC01268                                          | -8.650840613   | 3.20E-11 |
| RP11-436K8.1                                       | -9.1534206     | 3.66E-11 |
| RP11-893F2.14                                      | -8.211591997   | 4.55E-11 |
| AF131215.9                                         | -8.346895896   | 7.37E-11 |
| RP1-140K8.5                                        | -7.58448199    | 8.15E-11 |
| ZNF561-AS1                                         | -2.939397831   | 9.05E-11 |
| RP11-104N10.2                                      | -2.659618794   | 1.14E-10 |
| RP5-882C2.2                                        | -3.146614921   | 1.50E-10 |
| MIAT                                               | -7.634121988   | 1.63E-10 |
| LINC00641                                          | -2.919069966   | 2.50E-10 |
| CTC-260E6.4                                        | -8.239041606   | 2.69E-10 |
| TPT1-AS1                                           | -2.889017128   | 3.55E-10 |

|                |             |          |                |              |          |
|----------------|-------------|----------|----------------|--------------|----------|
| RP11-221N13.3  | 5.221276331 | 1.97E-12 | AC114730.3     | -8.540168498 | 3.82E-10 |
| AP001065.15    | 8.370716353 | 2.71E-12 | RP11-444D3.1   | -8.218665966 | 4.12E-10 |
| CASC8          | 7.391618522 | 2.71E-12 | RP11-981G7.6   | -4.471913906 | 5.13E-10 |
| RP11-121P12.1  | 9.043223723 | 2.97E-12 | CTC-559E9.5    | -8.344951059 | 6.27E-10 |
| KC6            | 8.731874238 | 4.18E-12 | RP11-398K22.12 | -2.943377545 | 9.86E-10 |
| LINC00668      | 8.742740586 | 4.45E-12 | RP11-159D12.2  | -2.798991565 | 1.02E-09 |
| RP11-879F14.2  | 7.167672853 | 5.85E-12 | RP1-40E16.9    | -8.392876913 | 1.07E-09 |
| LINC00937      | 8.783839089 | 8.75E-12 | RP11-196G18.24 | -7.657098272 | 1.30E-09 |
| LINC01615      | 8.243950135 | 1.01E-11 | CTC-260E6.6    | -8.030632831 | 1.49E-09 |
| CTD-2162K18.4  | 3.338334789 | 1.38E-11 | FGF14-AS2      | -7.851104231 | 2.11E-09 |
| CTD-2054N24.2  | 8.481067491 | 2.59E-11 | MIR3681HG      | -8.879008143 | 2.81E-09 |
| RP11-1149O23.3 | 8.06830903  | 3.64E-11 | ZNF529-AS1     | -5.273696736 | 2.83E-09 |
| CTD-2574D22.4  | 2.185932751 | 4.70E-11 | FAM212B-AS1    | -6.817557936 | 3.47E-09 |
| LINC00704      | 8.789363096 | 4.84E-11 | LINC00997      | -2.566414249 | 5.29E-09 |
| FENDRR         | 8.871195576 | 8.73E-11 | LINC02199      | -7.534188611 | 5.40E-09 |
| AC006946.16    | 6.245377065 | 1.48E-10 | CTD-2619J13.17 | -7.692717819 | 6.18E-09 |
| LINC02163      | 8.256808714 | 1.70E-10 | RP11-71N10.1   | -8.619040808 | 6.40E-09 |
| RP11-66B24.4   | 8.411213248 | 1.78E-10 | RP11-15H20.6   | -5.437567657 | 6.65E-09 |
| CTC-308K20.1   | 4.217809789 | 3.39E-10 | LINC01550      | -8.085630697 | 7.55E-09 |
| RP11-268G12.1  | 4.871952911 | 3.91E-10 | ZNF582-AS1     | -7.903489168 | 9.86E-09 |
| RP4-756H11.3   | 3.053415812 | 4.84E-10 | LINC01535      | -7.587569134 | 1.12E-08 |
| STXBP5-AS1     | 4.832831339 | 6.31E-10 | LINC00403      | -7.699092752 | 1.72E-08 |
| RP13-270P17.3  | 4.51796317  | 6.97E-10 | RP11-159D12.8  | -2.225130911 | 1.75E-08 |
| RP4-555D20.4   | 3.567185961 | 8.62E-10 | RP11-713M15.2  | -7.552931119 | 2.17E-08 |
| RP11-962G15.1  | 5.492674363 | 1.17E-09 | ATP2B1-AS1     | -4.769950165 | 2.53E-08 |
| RP11-471M2.3   | 7.569974173 | 1.21E-09 | CTD-2291D10.4  | -7.697930084 | 2.78E-08 |
| RP11-191L9.4   | 7.544550047 | 1.24E-09 | RP11-448P19.1  | -8.466375954 | 2.88E-08 |
| RP11-419I17.1  | 5.188552613 | 2.55E-09 | RP4-751H13.7   | -4.908088963 | 3.87E-08 |
| MNX1-AS1       | 4.331028456 | 2.88E-09 | RP11-223I10.1  | -4.899060475 | 4.30E-08 |
| AC116614.1     | 5.717797695 | 3.06E-09 | RP11-472N13.3  | -7.835931094 | 4.56E-08 |
| TSPEAR-AS2     | 7.861341045 | 4.06E-09 | LINC01105      | -8.210805291 | 4.78E-08 |
| GATA2-AS1      | 7.511897668 | 4.17E-09 | RP4-756G23.5   | -7.97797169  | 5.04E-08 |
| LINC01106      | 7.775865143 | 4.51E-09 | PTPRD-AS1      | -7.51830869  | 5.39E-08 |
| RP11-440D17.3  | 7.420510911 | 4.73E-09 | RP11-496D24.2  | -7.031095606 | 5.62E-08 |
| LINC00941      | 4.901685682 | 5.11E-09 | ST7-AS1        | -4.374864479 | 6.18E-08 |
| TSPEAR-AS1     | 7.720834221 | 5.64E-09 | MAMDC2-AS1     | -3.933905485 | 7.18E-08 |
| RP11-359K18.4  | 3.529648568 | 5.78E-09 | LINC00265      | -1.778749128 | 7.71E-08 |
| AC141928.1     | 6.975413428 | 6.36E-09 | RP1-193H18.2   | -4.664498604 | 8.02E-08 |
| RP1-102E24.8   | 7.947629154 | 6.95E-09 | RAMP2-AS1      | -8.60775794  | 8.64E-08 |
| RP11-408B11.2  | 7.274106998 | 7.61E-09 | FTX            | -2.006892193 | 1.18E-07 |
| LBX2-AS1       | 4.21313293  | 8.53E-09 | LINC01415      | -8.371321319 | 1.48E-07 |
| RP4-639F20.1   | 2.662459679 | 8.82E-09 | RP11-481J2.4   | -7.144945655 | 1.76E-07 |
| EML2-AS1       | 4.336272386 | 1.09E-08 | RP11-395L14.18 | -2.820322349 | 1.77E-07 |
| RP11-63G10.4   | 7.212949803 | 1.11E-08 | HAND2-AS1      | -7.871059918 | 1.90E-07 |
| RP11-809O17.1  | 4.287316525 | 1.19E-08 | C6orf3         | -3.798519763 | 1.94E-07 |
| RP11-328K4.1   | 7.624906303 | 1.43E-08 | RP11-57H14.4   | -2.092178357 | 2.09E-07 |
| SNHG8          | 3.401142657 | 2.65E-08 | RP5-1024N4.4   | -7.130551155 | 2.15E-07 |

|                |             |          |                 |              |          |
|----------------|-------------|----------|-----------------|--------------|----------|
| RP11-416N2.4   | 5.710982828 | 2.69E-08 | CTC-543D15.8    | -7.521818143 | 2.35E-07 |
| RP11-497G19.2  | 7.584318915 | 3.32E-08 | ZNF790-AS1      | -7.2818115   | 2.38E-07 |
| RP11-295G20.2  | 2.273079322 | 4.32E-08 | RP11-471B22.3   | -7.2094215   | 2.84E-07 |
| SZT2-AS1       | 7.536631183 | 4.74E-08 | CTD-2017D11.1   | -3.960102808 | 2.97E-07 |
| CTD-2207P18.2  | 7.554943496 | 6.98E-08 | RP11-290O12.2   | -7.111607088 | 3.32E-07 |
| UPK1A-AS1      | 7.064243249 | 6.99E-08 | RP11-329B9.4    | -3.828846578 | 3.74E-07 |
| CTD-2587H24.5  | 7.513565712 | 7.00E-08 | RP11-488C13.5   | -2.246146887 | 4.77E-07 |
| CTD-2066L21.3  | 6.285733224 | 7.90E-08 | NNT-AS1         | -2.064197224 | 5.02E-07 |
| RP11-1038A11.1 | 7.25275581  | 8.52E-08 | LINC00391       | -7.146426634 | 5.71E-07 |
| LINC00623      | 3.533898273 | 9.56E-08 | CTA-293F17.1    | -4.702427301 | 5.76E-07 |
| RP11-89C3.4    | 7.943650619 | 1.01E-07 | AC010729.1      | -7.260223812 | 5.96E-07 |
| LINC00689      | 7.919931953 | 1.49E-07 | RP11-710C12.1   | -6.584402572 | 6.24E-07 |
| LINC01162      | 7.206055523 | 1.50E-07 | CTD-2587H19.2   | -6.980442654 | 6.68E-07 |
| LINC00702      | 6.819882379 | 1.58E-07 | RP11-617F23.1   | -3.124766954 | 6.90E-07 |
| CTD-2311M21.3  | 7.220608546 | 1.59E-07 | XXbac-BPG283O16 | -2.719804735 | 7.12E-07 |
| AC060834.3     | 7.227385695 | 1.77E-07 | RP11-1148L6.8   | -2.711128153 | 7.16E-07 |
| CTD-2303H24.2  | 4.704207831 | 1.86E-07 | RP11-274B21.10  | -7.017479016 | 1.01E-06 |
| RP11-15A1.2    | 6.787720725 | 1.88E-07 | RP11-277P12.20  | -2.86194715  | 1.03E-06 |
| RP5-965G21.4   | 4.610304614 | 2.04E-07 | RP11-966I7.2    | -7.196263744 | 1.09E-06 |
| EGFR-AS1       | 7.467470445 | 2.19E-07 | RP11-25K19.1    | -5.405367611 | 1.31E-06 |
| RP11-467L13.7  | 3.326213921 | 3.44E-07 | CTD-2541J13.1   | -3.859070692 | 1.42E-06 |
| AF241725.6     | 7.924878636 | 3.66E-07 | RP11-4O1.2      | -4.615001879 | 1.45E-06 |
| LINC01583      | 6.789227152 | 4.51E-07 | GS1-24F4.2      | -6.779841943 | 1.45E-06 |
| LURAP1L-AS1    | 3.789069238 | 4.54E-07 | RP11-679B19.1   | -8.107790291 | 1.51E-06 |
| RP11-656D10.3  | 3.355014087 | 5.27E-07 | RP11-225B17.2   | -2.395268743 | 1.81E-06 |
| LVCAT1         | 5.211867124 | 6.09E-07 | AP002954.3      | -3.351638835 | 1.87E-06 |
| NOVA1-AS1      | 2.538877294 | 6.37E-07 | LPP-AS2         | -3.390293858 | 1.92E-06 |
| RP11-440D17.4  | 7.058620585 | 6.76E-07 | H19             | -5.533234603 | 2.07E-06 |
| OSMR-AS1       | 4.848799816 | 7.28E-07 | NR2F1-AS1       | -2.868865851 | 2.32E-06 |
| MIR548XHG      | 6.517723896 | 8.96E-07 | RP11-823E8.3    | -4.921400554 | 2.60E-06 |
| RP11-495K9.9   | 6.202264434 | 8.96E-07 | DNM3OS          | -7.790383001 | 2.74E-06 |
| AC007773.2     | 4.236120734 | 1.03E-06 | RP11-16P6.1     | -4.139371016 | 3.47E-06 |
| AC156455.1     | 4.687323369 | 1.04E-06 | RP11-126K1.6    | -3.730455453 | 3.98E-06 |
| RP11-25H12.1   | 6.900994063 | 1.07E-06 | RP11-737O24.5   | -6.683925926 | 4.25E-06 |
| CYP4F26P       | 5.220397301 | 1.28E-06 | AC078842.3      | -6.312706899 | 5.01E-06 |
| LINC00659      | 6.365318386 | 1.52E-06 | RP11-283I3.6    | -2.064384119 | 5.27E-06 |
| RP13-463N16.6  | 7.120883305 | 1.64E-06 | RP11-257O5.2    | -1.980800207 | 5.32E-06 |
| PLBD1-AS1      | 6.911744437 | 1.87E-06 | AC064875.2      | -8.268709306 | 5.72E-06 |
| FAM95C         | 6.86653314  | 2.08E-06 | RP11-715J22.6   | -3.397527777 | 5.97E-06 |
| LINC01036      | 6.818139675 | 2.35E-06 | RP11-742D12.2   | -6.600456329 | 6.20E-06 |
| LINC01273      | 5.680137692 | 2.37E-06 | ATP6V0E2-AS1    | -2.617283231 | 6.45E-06 |
| RNF139-AS1     | 2.092008006 | 2.49E-06 | LINCR-0001      | -3.583810268 | 7.15E-06 |
| RP11-284F21.7  | 4.128882055 | 2.63E-06 | LINC00909       | -1.795020664 | 7.52E-06 |
| RP11-402J6.1   | 6.757541223 | 2.72E-06 | RP11-251G23.5   | -2.710204464 | 7.65E-06 |
| LMLN-AS1       | 5.648446421 | 2.82E-06 | AC073343.13     | -3.817835458 | 7.97E-06 |
| RP11-519M16.1  | 6.69772685  | 2.85E-06 | LINC01224       | -6.942475864 | 8.32E-06 |
| LINC00460      | 3.729442416 | 3.14E-06 | RP11-399B17.1   | -3.845322242 | 8.48E-06 |

|                 |             |          |                |              |          |
|-----------------|-------------|----------|----------------|--------------|----------|
| RP11-49I11.1    | 3.617485545 | 3.44E-06 | RP11-999E24.3  | -5.359679484 | 9.02E-06 |
| RP11-66B24.1    | 6.774858729 | 3.65E-06 | RP5-981L23.7   | -6.696184964 | 9.14E-06 |
| RP11-575F12.1   | 6.731795954 | 3.72E-06 | RP11-834C11.4  | -6.194158157 | 9.19E-06 |
| RP11-148O21.4   | 6.908853839 | 3.99E-06 | RP11-212P7.2   | -2.845628074 | 9.90E-06 |
| RP11-326A19.4   | 4.369169949 | 4.03E-06 | ASB16-AS1      | -1.933744054 | 1.04E-05 |
| HCG25           | 2.351298305 | 4.45E-06 | RP11-420L9.5   | -1.908570577 | 1.10E-05 |
| RP11-268G12.3   | 4.200333373 | 4.56E-06 | RP11-403A3.2   | -7.184113199 | 1.17E-05 |
| RP11-403I13.5   | 6.607682454 | 5.12E-06 | RP11-348P10.2  | -1.86151317  | 1.23E-05 |
| RP11-802E16.3   | 3.829069566 | 5.16E-06 | SNHG18         | -4.647868931 | 1.37E-05 |
| RP11-888D10.4   | 2.615126859 | 5.27E-06 | RP11-351J23.2  | -7.008216051 | 1.41E-05 |
| RP1-28O10.1     | 6.740643804 | 5.65E-06 | RP11-329B9.3   | -5.279490129 | 1.42E-05 |
| LINC01037       | 6.270344811 | 6.20E-06 | CCNT2-AS1      | -2.887192815 | 1.44E-05 |
| RP3-522D1.1     | 3.049267853 | 7.07E-06 | PROX1-AS1      | -6.483430831 | 1.45E-05 |
| LINC01703       | 3.063371686 | 7.75E-06 | RP11-395I6.3   | -3.734767077 | 1.53E-05 |
| LINC01186       | 6.337343389 | 7.82E-06 | MZF1-AS1       | -4.109415081 | 1.56E-05 |
| DNAH17-AS1      | 6.671372493 | 8.96E-06 | U52111.14      | -5.209094491 | 1.56E-05 |
| CTC-480C2.1     | 6.476276773 | 9.00E-06 | LINC01759      | -6.155727325 | 1.58E-05 |
| GAPLINC         | 6.488946566 | 9.04E-06 | RP11-375N15.2  | -5.839939169 | 1.74E-05 |
| LL22NC03-86G7.1 | 4.727001344 | 9.25E-06 | RP11-268J15.5  | -3.199082895 | 1.80E-05 |
| AC073130.3      | 6.442162012 | 9.95E-06 | PSMA3-AS1      | -1.50008569  | 1.84E-05 |
| CRNDE           | 1.661141577 | 1.07E-05 | GLIDR          | -2.364688409 | 1.86E-05 |
| XXyac-YM21GA2.  | 6.615020672 | 1.08E-05 | C8orf31        | -6.714240074 | 1.88E-05 |
| RP11-54A9.1     | 7.48207227  | 1.12E-05 | RP11-46H11.11  | -5.332381628 | 1.88E-05 |
| RP5-1139I1.1    | 6.931226549 | 1.15E-05 | RP11-174J11.1  | -6.328840649 | 2.05E-05 |
| SNHG6           | 1.619245894 | 1.16E-05 | RP11-731C17.2  | -3.268225973 | 2.30E-05 |
| RP11-490G2.2    | 6.510949254 | 1.22E-05 | RP5-967N21.11  | -2.324336409 | 2.30E-05 |
| RP11-162D16.2   | 6.403115552 | 1.33E-05 | RP11-51F16.1   | -4.936587761 | 2.35E-05 |
| RP11-60A8.1     | 7.059636969 | 1.42E-05 | RP13-942N8.1   | -3.265656338 | 2.40E-05 |
| RP11-462L8.1    | 2.684911141 | 1.43E-05 | GS1-358P8.4    | -1.446336752 | 2.47E-05 |
| RP11-535M15.1   | 6.836140007 | 1.53E-05 | CH17-408M7.1   | -6.258366558 | 2.57E-05 |
| RP11-134G8.5    | 3.127231423 | 1.71E-05 | RP5-1039K5.19  | -1.852020323 | 2.86E-05 |
| LINC01694       | 4.575615416 | 1.74E-05 | TRAF3IP2-AS1   | -1.702715019 | 3.10E-05 |
| RP11-148O21.3   | 6.106927561 | 2.05E-05 | RP11-120J1.1   | -3.974457425 | 3.13E-05 |
| RP13-977J11.2   | 4.165965675 | 2.22E-05 | FAM66C         | -1.945290987 | 3.52E-05 |
| ENO1-IT1        | 2.386887831 | 2.46E-05 | RP5-894A10.2   | -2.171188768 | 3.73E-05 |
| SENCR           | 6.08542527  | 2.56E-05 | RP5-1054A22.4  | -6.344397026 | 3.74E-05 |
| CEBPA-AS1       | 3.857018567 | 3.16E-05 | FLJ16779       | -6.872421382 | 3.78E-05 |
| HIF1A-AS2       | 6.404846376 | 3.20E-05 | ZNF793-AS1     | -6.754784127 | 3.80E-05 |
| RP11-527N22.2   | 5.339134282 | 3.42E-05 | RP11-70D24.2   | -6.968508177 | 4.04E-05 |
| CTC-378H22.1    | 6.534646783 | 3.76E-05 | RP11-1263C18.2 | -7.313387613 | 4.16E-05 |
| RP11-686D22.8   | 6.198503793 | 3.99E-05 | CTD-2049O4.1   | -7.321369781 | 4.22E-05 |
| RP11-148O21.6   | 6.315889341 | 4.01E-05 | AC004540.4     | -6.282644251 | 4.39E-05 |
| RP11-531A24.5   | 2.303603847 | 4.33E-05 | AC009120.6     | -1.504138068 | 5.08E-05 |
| LINC00706       | 6.476287527 | 4.44E-05 | SLC26A4-AS1    | -5.453726901 | 6.07E-05 |
| FSIP2-AS1       | 3.101133259 | 4.68E-05 | RP11-298I3.6   | -4.958802067 | 6.14E-05 |
| AC012485.2      | 5.923739888 | 4.79E-05 | TFAP2A-AS1     | -2.578756204 | 6.18E-05 |
| AC007879.5      | 3.074641483 | 4.97E-05 | RP11-563K23.1  | -6.952420153 | 6.18E-05 |

|                |             |                 |
|----------------|-------------|-----------------|
| LINC01006      | 3.63077232  | 5.60E-05        |
| AC079922.3     | 1.956902709 | 5.98E-05        |
| KB-68A7.1      | 6.166678949 | 6.29E-05        |
| AP003900.6     | 6.142594363 | 7.05E-05        |
| AC073130.1     | 6.12655016  | 7.07E-05        |
| RP11-280G9.1   | 6.171046787 | 7.41E-05        |
| MYOSLID        | 6.251556237 | 8.30E-05        |
| RP11-122G18.11 | 4.018316325 | 8.30E-05        |
| RP11-148O21.2  | 6.292163975 | 8.38E-05        |
| RP11-818F20.5  | 5.837404855 | 8.44E-05        |
| AC116609.3     | 6.271703909 | 8.65E-05        |
| RP11-796E10.1  | 6.028707466 | 8.66E-05        |
| CTC-459F4.9    | 2.311443761 | 9.18E-05        |
| RP4-561L24.3   | 2.730763156 | 9.65E-05        |
| SNHG3          | 2.007679738 | 9.72E-05        |
| RP11-336A10.5  | 6.036433974 | 9.75E-05        |
| RP5-906A24.1   | 6.163773382 | 0.0001015202373 |
| RP11-445O3.3   | 5.996668    | 0.0001047885947 |
| RP11-789C2.1   | 6.134136909 | 0.000110518313  |
| RP11-77H9.2    | 2.414492258 | 0.0001109149926 |
| RP11-126K1.2   | 2.955735961 | 0.0001237668845 |
| RP11-61A14.1   | 5.6362257   | 0.0001275645902 |
| RP11-64C12.1   | 6.037386758 | 0.0001287785648 |
| RP11-681B3.4   | 5.946072551 | 0.0001294839333 |
| LRRC2-AS1      | 6.032954976 | 0.0001313836569 |
| RP1-80N2.3     | 6.076198882 | 0.0001424505241 |
| CTC-241N9.1    | 2.085569121 | 0.0001624255994 |
| RP11-745L13.2  | 5.965543072 | 0.0001629744574 |
| LINC01238      | 1.855748333 | 0.0001655287567 |
| RP11-284F21.10 | 3.759829959 | 0.0001668059475 |
| LINC01293      | 5.944346668 | 0.0001670993592 |
| RP11-43A14.1   | 4.387826573 | 0.0001750318637 |
| PIK3CD-AS2     | 2.914291017 | 0.0001805689676 |
| RP11-445F12.1  | 3.584080174 | 0.0001880725427 |
| CTD-2128A3.2   | 5.916777774 | 0.0001900227398 |
| CAPN10-AS1     | 1.275388447 | 0.0001929530167 |
| RP11-115J23.1  | 3.59549855  | 0.0002004776747 |
| AC058791.1     | 2.103776712 | 0.0002022208292 |
| LINC00397      | 5.833030396 | 0.0002076789859 |
| RP3-414A15.2   | 5.833030396 | 0.0002076789859 |
| RP11-553A21.3  | 5.668675854 | 0.0002120600755 |
| HRAT17         | 6.195418077 | 0.0002233493012 |
| RAD21-AS1      | 3.167226406 | 0.0002277363176 |
| AC007879.2     | 4.331446467 | 0.0002325843762 |
| AC115522.3     | 4.767627014 | 0.0002331553758 |
| FOXP4-AS1      | 2.326531954 | 0.0002478962423 |
| KB-1980E6.3    | 3.412296271 | 0.0002681835125 |

|               |              |                 |
|---------------|--------------|-----------------|
| CTB-92J24.2   | -5.314069527 | 6.34E-05        |
| LINC01003     | -2.501040256 | 6.39E-05        |
| RP11-645C24.5 | -6.087222557 | 6.49E-05        |
| RP11-582J16.4 | -4.940195472 | 6.60E-05        |
| CTC-260E6.3   | -6.190075006 | 6.62E-05        |
| AC083843.4    | -4.139200705 | 6.70E-05        |
| RP11-625L16.1 | -6.239954724 | 6.85E-05        |
| RP11-73M18.8  | -1.594714807 | 8.36E-05        |
| RP11-479G22.8 | -2.85231467  | 8.58E-05        |
| RP11-546D6.3  | -1.665107563 | 8.65E-05        |
| RP11-1114A5.4 | -2.634229881 | 8.80E-05        |
| KLF3-AS1      | -4.575331248 | 9.04E-05        |
| LINC00326     | -6.314611164 | 9.07E-05        |
| LINC00664     | -7.036373964 | 9.29E-05        |
| RP11-1191J2.5 | -6.320824449 | 9.92E-05        |
| RP5-942I16.1  | -6.014181696 | 0.0001022728821 |
| RP11-565F19.2 | -2.237585259 | 0.0001032761953 |
| RP11-1191J2.2 | -6.395026286 | 0.000105034038  |
| AC108025.2    | -6.017357396 | 0.0001211827081 |
| RP11-873E20.1 | -6.226084246 | 0.0001229669432 |
| RP11-177H2.1  | -6.058860997 | 0.0001237316106 |
| RP11-172H24.4 | -3.04103295  | 0.0001265054452 |
| AP000473.8    | -5.81538309  | 0.0001278147999 |
| LINC01571     | -6.934581678 | 0.0001285817886 |
| CTD-2380F24.1 | -5.961929438 | 0.000133566291  |
| RP11-713C5.1  | -6.876356427 | 0.0001355681751 |
| HAS2-AS1      | -4.085607506 | 0.000145027447  |
| LINC00844     | -6.506214183 | 0.0001455942328 |
| RP11-75C10.7  | -6.823811427 | 0.000155208407  |
| LINC00908     | -6.481107341 | 0.0001560257212 |
| CTC-490E21.11 | -2.791691542 | 0.0001629744574 |
| RP11-13A1.1   | -5.656338899 | 0.0001779992895 |
| RP3-412A9.16  | -5.700218034 | 0.000178039151  |
| RP11-399J13.2 | -3.953294004 | 0.000179960132  |
| HOXD-AS2      | -5.941264646 | 0.0001805001733 |
| RP11-498P14.3 | -2.986561638 | 0.0001840136747 |
| LINC00977     | -6.219898602 | 0.0001857006558 |
| SLC25A25-AS1  | -1.773493332 | 0.0001957125507 |
| RP11-378A13.1 | -3.932969614 | 0.0001961897978 |
| CTB-12A17.2   | -4.347383965 | 0.0002094631782 |
| RP11-506M12.1 | -2.336284409 | 0.0002171325614 |
| RP11-231C18.1 | -6.020036331 | 0.0002193220442 |
| AC073283.4    | -5.977321528 | 0.0002270424433 |
| CTD-2003C8.2  | -5.594257181 | 0.0002325843762 |
| RP11-797A18.5 | -2.60626251  | 0.0002400735245 |
| ZSCAN16-AS1   | -1.461219801 | 0.0002479286896 |
| FOXG1-AS1     | -6.018204201 | 0.0002485594216 |



|                |             |                 |
|----------------|-------------|-----------------|
| RP11-85I17.2   | 1.952760501 | 0.0002794556833 |
| C6orf99        | 5.335843395 | 0.000296850181  |
| RP4-660H19.1   | 5.734910136 | 0.0003298900161 |
| RP11-93B14.4   | 5.670451112 | 0.0003303264004 |
| RP11-848P1.2   | 2.476435257 | 0.0003354439189 |
| ZNF32-AS2      | 3.544314316 | 0.0003360913493 |
| AC017101.10    | 5.833569888 | 0.0003380045622 |
| AC006369.2     | 5.86520115  | 0.000353289208  |
| RP11-289F5.1   | 4.967720654 | 0.0003563823617 |
| CTC-378H22.2   | 5.863256032 | 0.0003609088144 |
| RP11-195F19.9  | 4.469005451 | 0.0004238631088 |
| AC009502.4     | 5.730004875 | 0.0004430834675 |
| RP11-783K16.13 | 2.343228486 | 0.000449774211  |
| OLMALINC       | 1.752506758 | 0.0004498855903 |
| RP11-146F11.5  | 3.46808574  | 0.0004612645846 |
| LINC01023      | 3.312964937 | 0.00049292833   |
| LINC01291      | 5.777375091 | 0.0005150146816 |
| A2M-AS1        | 4.168786915 | 0.0005431319448 |
| RP11-1149O23.4 | 5.650212647 | 0.0005514826019 |
| RP11-1038A11.3 | 5.598300563 | 0.0005962509155 |
| LINC01611      | 5.665276992 | 0.0006123094382 |
| CYYR1-AS1      | 5.796277869 | 0.0006165715929 |
| TIPARP-AS1     | 1.715318172 | 0.0006259775515 |
| LINC01011      | 1.594381048 | 0.0006314346565 |
| CFAP58-AS1     | 5.230445092 | 0.0006387733307 |
| XXyac-YX65C7_A | 3.152361148 | 0.0006402732459 |
| AP001596.6     | 3.794530851 | 0.000642315236  |
| RP1-46F2.3     | 5.65892083  | 0.0006545522028 |
| RP11-686D22.4  | 5.215504474 | 0.0006545533053 |
| CTD-2020K17.1  | 3.574560661 | 0.0006555385044 |
| CTD-2035E11.3  | 2.266749235 | 0.0006709769816 |
| CTD-3162L10.1  | 3.682695686 | 0.0007170087374 |
| LINC01385      | 5.213778355 | 0.0007681225893 |
| LINC00887      | 4.768162992 | 0.0007718938547 |
| CTC-296K1.4    | 3.998608616 | 0.0007742883328 |
| RP11-255I10.2  | 5.566707451 | 0.0008192694951 |
| RP11-313L6.2   | 5.542958397 | 0.0008296757669 |
| SERTAD4-AS1    | 4.408977222 | 0.0008421646925 |
| ASH1L-AS1      | 1.385697423 | 0.0009050364661 |
| LINC01763      | 5.073877759 | 0.0009411342309 |
| RP11-1094H24.4 | 3.435986713 | 0.000978736911  |
| RP11-399K21.14 | 3.580469233 | 0.0009919611781 |
| CTD-2527I21.5  | 5.707627463 | 0.001009396059  |
| RP11-33E12.2   | 2.942980229 | 0.001049733793  |
| RP11-337C18.8  | 1.595992218 | 0.001058565184  |
| RP5-1071N3.1   | 3.232444987 | 0.001062444777  |
| RP11-1C8.4     | 5.648537776 | 0.001063952771  |

|               |              |                 |
|---------------|--------------|-----------------|
| TNKS2-AS1     | -3.728040785 | 0.0002505536513 |
| LINC01060     | -4.844039641 | 0.0002649837324 |
| BDNF-AS       | -2.440499658 | 0.0002701641166 |
| RP11-698N11.2 | -5.905142346 | 0.0002839375426 |
| RP11-218E20.3 | -6.164438919 | 0.0002884489359 |
| RP3-394A18.1  | -6.54873568  | 0.0003054275043 |
| LINC01748     | -5.173272614 | 0.0003304188215 |
| AC007204.2    | -6.208465703 | 0.000337371729  |
| RP11-384F7.2  | -5.770543132 | 0.0003414203548 |
| RP11-797A18.6 | -2.336037687 | 0.0003469052726 |
| RP11-838N2.5  | -6.037508918 | 0.0003469971602 |
| C9orf170      | -5.720069529 | 0.0003627820659 |
| RP11-77K12.9  | -4.828734775 | 0.0003678902314 |
| RP11-180M15.7 | -2.099645006 | 0.0003789415833 |
| CTD-2528L19.6 | -1.793558835 | 0.0003862636578 |
| BACE1-AS      | -1.443267009 | 0.0003869969702 |
| RP11-266K4.14 | -4.242588344 | 0.000397881714  |
| RP11-216B9.6  | -2.91571161  | 0.0004165283251 |
| RP5-1042I8.7  | -3.113608267 | 0.0004197058299 |
| LLNLR-245B6.1 | -1.761195398 | 0.0004349915419 |
| AF127936.9    | -2.501819757 | 0.0004353287072 |
| RP11-347E10.1 | -5.757603834 | 0.0004553496524 |
| CTB-113D17.1  | -5.734937449 | 0.0004607993101 |
| RP3-368A4.6   | -1.449611238 | 0.0004745898413 |
| RP11-227D13.1 | -5.867579877 | 0.0005170571664 |
| RP11-644A7.2  | -5.790196387 | 0.0005276721712 |
| RP11-428J1.5  | -1.543597441 | 0.0005411830668 |
| CTD-2516F10.2 | -3.097854954 | 0.0005424818889 |
| LINC01630     | -5.607228072 | 0.0005489052178 |
| AC017104.6    | -3.316715648 | 0.0005752778421 |
| CTD-3014M21.1 | -4.237842183 | 0.0005861190858 |
| RP11-263K19.6 | -2.906382897 | 0.0006004662344 |
| RP11-507K2.3  | -5.740163394 | 0.0006139981934 |
| CD27-AS1      | -1.901100354 | 0.0006156871384 |
| RP11-340F14.6 | -6.094730703 | 0.0006597727109 |
| RP5-912I13.2  | -5.21900265  | 0.0006875965339 |
| HCG17         | -4.4800824   | 0.0007135491804 |
| LIFR-AS1      | -3.059186499 | 0.0007322952109 |
| AC002454.1    | -5.217373136 | 0.0007379084536 |
| CTD-2017D11.2 | -3.427087233 | 0.0007380361314 |
| RP11-815I9.4  | -1.355214018 | 0.0007654657756 |
| RP5-1024N4.5  | -6.026962016 | 0.000770880823  |
| RP11-307B6.3  | -5.297361506 | 0.0007717132749 |
| MIMT1         | -6.075412883 | 0.0007965113531 |
| MESTIT1       | -6.156109399 | 0.000840727958  |
| LINC01102     | -5.979861627 | 0.0008665028436 |
| RP1-153G14.4  | -3.352936442 | 0.0008724535267 |

|               |             |                |
|---------------|-------------|----------------|
| RP11-800A3.4  | 3.836645469 | 0.001103710061 |
| CTA-14H9.5    | 5.444560449 | 0.001111568331 |
| RP11-585P4.5  | 2.303163707 | 0.001122770321 |
| RP11-379B18.5 | 3.018498083 | 0.001126284887 |
| LRRC3-AS1     | 5.440915985 | 0.001134270019 |
| RP11-320G24.1 | 5.44144726  | 0.001135271104 |
| RP11-344P13.6 | 5.019574774 | 0.001135717299 |
| LINC01096     | 2.569687218 | 0.001152849704 |
| RP11-666A8.8  | 2.71470148  | 0.001185413762 |
| RP11-377G16.2 | 5.05269672  | 0.001208141242 |
| RP11-397A16.1 | 5.144165161 | 0.001252642336 |
| CTA-280A3.2   | 5.43109425  | 0.001261036766 |
| MTUS2-AS1     | 4.327983052 | 0.00126518416  |
| RP11-6D1.3    | 5.100909506 | 0.001274578173 |
| PCBP3-OT1     | 4.988139472 | 0.001306281919 |
| AC007319.1    | 3.659058233 | 0.001320099891 |
| VIM-AS1       | 1.900326091 | 0.001325357573 |
| LINC01137     | 3.235447082 | 0.001389626545 |
| AC023590.1    | 5.440417548 | 0.001449039108 |
| RP11-26J3.1   | 3.195826099 | 0.001540317144 |
| CTD-3131K8.2  | 1.618109617 | 0.001550529686 |
| AC006946.17   | 5.357788586 | 0.001586759001 |
| RP11-108K3.1  | 5.359911445 | 0.001590979682 |
| WWC2-AS2      | 3.74645957  | 0.00169144635  |
| CASC20        | 5.373598885 | 0.001717624055 |
| CTB-60B18.12  | 3.931782788 | 0.001731460144 |
| GAS5          | 1.714774757 | 0.001737349134 |
| LINC00858     | 5.202331    | 0.001792908341 |
| RP11-273G15.2 | 4.355439323 | 0.001960726502 |
| SERPINB9P1    | 4.380934561 | 0.001960820253 |
| RP11-495K9.10 | 4.068974459 | 0.001973420312 |
| CTD-2589M5.5  | 5.00840386  | 0.002049313577 |
| RP11-190A12.8 | 4.239058034 | 0.00209242228  |
| CTA-292E10.6  | 1.83530987  | 0.002103897253 |
| RP11-276H7.2  | 4.864001821 | 0.002168345373 |
| RP11-445O3.2  | 5.297465727 | 0.002174603479 |
| ERVK-28       | 3.507293559 | 0.002219708396 |
| UXT-AS1       | 2.187486049 | 0.002240510999 |
| AC137932.6    | 4.936227677 | 0.002326603314 |
| RP11-222K16.1 | 4.830431392 | 0.002339860971 |
| CARD8-AS1     | 1.859352843 | 0.002363507089 |
| RP11-91J19.3  | 3.229595167 | 0.00237987829  |
| RP5-1011O1.2  | 3.750543005 | 0.0024213379   |
| LINC01024     | 1.414845232 | 0.002426669236 |
| RP11-783K16.5 | 2.211442807 | 0.002505096368 |
| RP4-621F18.2  | 2.891474187 | 0.002586145421 |
| RP11-686D22.5 | 5.227165141 | 0.002588758152 |

|                |              |                 |
|----------------|--------------|-----------------|
| LINC01158      | -3.599358667 | 0.0009065648927 |
| RP11-644F5.11  | -1.56797691  | 0.0009066423293 |
| RP4-761J14.10  | -5.526895507 | 0.0009086436691 |
| RP11-78O7.2    | -3.269803284 | 0.0009193049761 |
| AFDN-AS1       | -2.1176868   | 0.0009529911553 |
| RP11-731J8.2   | -6.106345858 | 0.00096371095   |
| AP000289.6     | -6.149069418 | 0.0009735564463 |
| RP5-1159O4.2   | -3.33637214  | 0.0009783005669 |
| CTB-118P15.2   | -5.481705306 | 0.0009795451864 |
| CTC-467M3.1    | -5.646775277 | 0.0009841545403 |
| CTC-425O23.2   | -2.852989458 | 0.001073961961  |
| ARMCX5-GPRASP1 | -1.407923176 | 0.00109723521   |
| RP1-273N12.4   | -4.680797573 | 0.001114511942  |
| RP11-142E9.1   | -2.148972429 | 0.001153749262  |
| AC002456.2     | -3.333117086 | 0.00119975203   |
| CAHM           | -2.066462593 | 0.001205708899  |
| RP11-893F2.13  | -2.327250988 | 0.001208141242  |
| RP5-894A10.6   | -1.410084025 | 0.00121887929   |
| RP11-324E6.10  | -5.020937672 | 0.001218901552  |
| AP000254.8     | -2.895415786 | 0.001234586927  |
| AC053503.11    | -5.392283488 | 0.00125124486   |
| LINC00945      | -5.54097168  | 0.001325653116  |
| PLCG1-AS1      | -2.769857823 | 0.001345851591  |
| RP4-657D16.3   | -3.717522492 | 0.001415189303  |
| RP11-723O4.9   | -2.963186604 | 0.00144225339   |
| RP3-405J10.3   | -2.720753833 | 0.001451610997  |
| RP11-549B18.1  | -2.066701039 | 0.001453948792  |
| RP11-303E16.9  | -2.946717768 | 0.001498140987  |
| LINC01948      | -5.764782325 | 0.001519939855  |
| CTD-2621I17.3  | -2.433641132 | 0.001532216372  |
| CTC-429P9.3    | -1.61425528  | 0.001584564787  |
| RP11-141M1.3   | -5.389178491 | 0.001586759001  |
| RP11-1109F11.3 | -1.584739307 | 0.001588949572  |
| RP11-51J9.6    | -4.941437238 | 0.001664504684  |
| RP11-430H10.1  | -5.529941441 | 0.001677124986  |
| RP11-178H8.7   | -1.996689343 | 0.001691175555  |
| GAS1RR         | -4.356538262 | 0.001723439264  |
| AP006222.2     | -5.409402215 | 0.001739006595  |
| RP11-612B6.2   | -5.2185601   | 0.001739823326  |
| RP11-44F14.6   | -2.711064773 | 0.001784799015  |
| RP11-81H14.2   | -5.286201455 | 0.001804927089  |
| RP11-38M8.1    | -5.989338989 | 0.001825357441  |
| CBR3-AS1       | -2.111612848 | 0.001848250624  |
| RP11-1060J15.9 | -5.057482317 | 0.001897250751  |
| RP11-88E10.4   | -2.970796319 | 0.001899397513  |
| MIR181A2HG     | -3.068725026 | 0.001971044384  |
| RP11-495L19.1  | -4.385950377 | 0.002059250533  |

|                 |             |                |
|-----------------|-------------|----------------|
| RP11-982M15.6   | 4.795134696 | 0.002743005064 |
| TARID           | 5.131806908 | 0.002771968959 |
| CTD-2314G24.2   | 5.351285335 | 0.002777985103 |
| CTD-2574D22.3   | 1.219204514 | 0.002957277444 |
| AP000640.10     | 5.400424159 | 0.002995682983 |
| RP11-533E19.5   | 2.854644329 | 0.003073410086 |
| AC069277.2      | 5.147331362 | 0.003112925884 |
| AP000695.4      | 3.416925837 | 0.003157362787 |
| AC018816.3      | 5.17125313  | 0.003190497569 |
| RP11-565A3.2    | 5.252153328 | 0.003195230488 |
| RP11-930P14.2   | 4.416514667 | 0.003244161404 |
| RP4-806M20.4    | 4.969661965 | 0.003280006796 |
| RP11-284F21.9   | 2.870204056 | 0.003382508368 |
| RP11-121L10.2   | 1.929467064 | 0.003489041343 |
| UCHL1-AS1       | 3.427530133 | 0.003512105265 |
| AC129492.6      | 4.059740766 | 0.003514426529 |
| AC140912.1      | 3.255235499 | 0.003529503524 |
| RP11-1334A24.5  | 2.375697794 | 0.003558685932 |
| RP11-626P14.2   | 2.26797985  | 0.003569273891 |
| CTD-2126E3.1    | 2.962621907 | 0.003576745562 |
| RP11-700A24.1   | 2.393535101 | 0.003625553534 |
| LINC00115       | 2.058579187 | 0.003644678278 |
| LINC01776       | 3.983772495 | 0.003706084058 |
| RP11-211G23.2   | 5.094660684 | 0.003707479166 |
| RP11-114H21.2   | 5.281203818 | 0.003726359863 |
| ALMS1-IT1       | 1.478924142 | 0.003776549229 |
| AC005264.2      | 5.278574391 | 0.003777830725 |
| AJ003147.9      | 3.526535287 | 0.003895413923 |
| DLGAP4-AS1      | 3.802442206 | 0.004250083204 |
| RP11-432J22.2   | 1.669411574 | 0.004252190209 |
| RP11-504P24.9   | 1.962017455 | 0.004254237365 |
| RP11-98I9.4     | 1.842933091 | 0.004333315917 |
| RP11-359E10.1   | 3.480699906 | 0.004367681772 |
| RP11-610P16.1   | 2.850455675 | 0.004433280276 |
| RP11-547D24.1   | 4.721708797 | 0.004476192619 |
| PVT1            | 1.306446058 | 0.004494224275 |
| LINC01111       | 5.511718329 | 0.004537567949 |
| HYMAI           | 5.040696403 | 0.004537567949 |
| RP1-137D17.1    | 5.038749263 | 0.004627321859 |
| HLA-F-AS1       | 1.5497679   | 0.004645809335 |
| LL21NC02-1C16.2 | 5.890732138 | 0.004724494364 |
| RP11-755F10.1   | 4.290032186 | 0.004897947718 |
| XXbac-BPG294E2  | 2.530545502 | 0.004953593184 |
| AC068831.10     | 2.283396586 | 0.004956503438 |
| RP11-676J12.7   | 5.871415047 | 0.005231143184 |
| CTD-3220F14.1   | 2.781303803 | 0.005275095619 |
| PACERR          | 3.216647238 | 0.005341262143 |

|               |              |                |
|---------------|--------------|----------------|
| RP11-73E17.2  | -1.5225864   | 0.002066691171 |
| RP11-379H18.1 | -1.47162864  | 0.00208566031  |
| RP11-454H19.2 | -5.491275053 | 0.002117863573 |
| CTC-301O7.4   | -2.520257058 | 0.002121245305 |
| CTD-2227E11.1 | -5.715709335 | 0.002187760254 |
| RP1-30M3.5    | -2.957415119 | 0.002318239095 |
| RP5-1085F17.3 | -1.699213656 | 0.002380817185 |
| AC005083.1    | -5.100366778 | 0.002413394299 |
| CTC-255N20.1  | -5.90996629  | 0.002439508492 |
| RP11-7F17.3   | -5.580193964 | 0.00247372978  |
| RP11-571L19.8 | -4.096570865 | 0.002515623008 |
| AP000280.66   | -7.07685636  | 0.002526135113 |
| RP11-517B11.7 | -1.948887852 | 0.002565866236 |
| RP11-49K24.8  | -5.084806688 | 0.002582499042 |
| RP11-455F5.3  | -2.775083786 | 0.002586820684 |
| AC104653.1    | -3.300505301 | 0.002628005199 |
| ZBED3-AS1     | -1.506734757 | 0.00271888178  |
| RP11-196G18.3 | -3.786317056 | 0.002722278814 |
| AP000708.1    | -5.357866885 | 0.002751679981 |
| ZNF638-IT1    | -1.964433573 | 0.002868869478 |
| RP11-70D24.3  | -5.505695201 | 0.002968008946 |
| BLACAT1       | -5.30854716  | 0.002993764745 |
| RP11-247A12.2 | -4.169126105 | 0.003010826868 |
| BAALC-AS2     | -5.621475819 | 0.003052205524 |
| RP11-429B14.4 | -2.884900617 | 0.00313103042  |
| RP11-620J15.1 | -5.318300474 | 0.003237995702 |
| AC097662.2    | -1.687064586 | 0.0032674624   |
| PTOV1-AS1     | -1.975556696 | 0.003281406381 |
| LINC00601     | -3.655881329 | 0.003293974386 |
| AC079584.3    | -5.146737373 | 0.003569273891 |
| RP5-1024C24.1 | -5.999230278 | 0.003644599512 |
| ADAMTS9-AS2   | -5.996907911 | 0.003644678278 |
| CHL1-AS2      | -5.65075024  | 0.003741768487 |
| RP11-204L24.2 | -3.122698041 | 0.003824633773 |
| RP11-447D11.3 | -2.285101453 | 0.003834401889 |
| LINC00638     | -2.516873246 | 0.00386929974  |
| LINC00506     | -5.295590616 | 0.00387448858  |
| RP11-345J18.2 | -5.54459906  | 0.003906506877 |
| RP11-429G19.3 | -5.180231863 | 0.004224718689 |
| ELOVL2-AS1    | -5.065880739 | 0.004229916802 |
| RP11-281O15.4 | -5.048132452 | 0.004303880939 |
| RP11-261P13.5 | -5.345587797 | 0.004311879315 |
| CTD-2310F14.1 | -5.097612394 | 0.004314407439 |
| RP11-333O1.1  | -4.797569852 | 0.004356240433 |
| RP11-229D13.3 | -2.522981967 | 0.004358301733 |
| ANKRD10-IT1   | -1.541373901 | 0.004425009632 |
| LINC00877     | -5.162567193 | 0.004430997495 |

|                |             |                |
|----------------|-------------|----------------|
| RP4-794I6.4    | 4.302509489 | 0.005583274299 |
| RP6-24A23.3    | 4.523628477 | 0.00589811513  |
| CTC-1337H24.4  | 3.823592819 | 0.006134441325 |
| RP11-167H9.4   | 3.150506454 | 0.006292529877 |
| MIR2052HG      | 3.947255514 | 0.006300265844 |
| LINC01885      | 4.994167419 | 0.006321021797 |
| AC131056.3     | 4.994167419 | 0.006321021797 |
| AJ003147.8     | 3.284970252 | 0.006400022459 |
| RP11-49I11.4   | 3.298447728 | 0.006716031652 |
| LINC01202      | 5.044433095 | 0.006718757131 |
| LINC01001      | 2.271547507 | 0.006862132394 |
| LINC01939      | 6.274155912 | 0.007125126266 |
| AC020571.3     | 4.550672319 | 0.007221518883 |
| RP3-467K16.2   | 4.46813714  | 0.007460598712 |
| AC092614.2     | 4.941359329 | 0.007464342372 |
| CTD-2382E5.6   | 2.51016861  | 0.007465628382 |
| RP13-143G15.4  | 4.43834854  | 0.007680267498 |
| RP11-315O6.1   | 1.918246088 | 0.007885067528 |
| RP11-415J8.5   | 2.871950971 | 0.007936253088 |
| HAR1A          | 4.666604453 | 0.008044817922 |
| LINC00526      | 1.255142528 | 0.008534755491 |
| AC137932.4     | 2.795844251 | 0.00869507607  |
| LINC01124      | 4.820811423 | 0.00877107676  |
| TM4SF1-AS1     | 3.203756647 | 0.009164230146 |
| RP11-798K23.1  | 4.808731238 | 0.0094402494   |
| RP11-381K20.2  | 2.670945807 | 0.009598075674 |
| RP11-460B17.2  | 4.468328266 | 0.009700297729 |
| SNCA-AS1       | 4.835756356 | 0.009801529201 |
| RP11-816J6.3   | 4.80383904  | 0.009874746881 |
| LIPE-AS1       | 1.590611256 | 0.009882149942 |
| CTD-2540B15.9  | 4.018448288 | 0.00988955589  |
| RP11-107N15.1  | 4.349087981 | 0.009996760949 |
| AP003068.23    | 2.087838199 | 0.0100518035   |
| SFTA1P         | 3.346689327 | 0.01028588464  |
| SLFNL1-AS1     | 1.774575445 | 0.01032988242  |
| RP11-15A1.3    | 3.031428648 | 0.01041824749  |
| RP4-536B24.4   | 3.687087304 | 0.01091224381  |
| WT1-AS         | 2.909754676 | 0.0110624291   |
| RP11-445P19.3  | 4.784105335 | 0.01113904435  |
| RP11-503E24.2  | 1.464539684 | 0.01116260243  |
| CTB-32O4.2     | 2.07953376  | 0.01132040195  |
| CTD-2270P14.5  | 1.611690475 | 0.01137785432  |
| AP001628.6     | 2.652537389 | 0.01166723233  |
| LINC01021      | 1.955564405 | 0.0116975285   |
| RP11-122G18.12 | 1.750285823 | 0.0117030675   |
| AC034220.3     | 2.795064426 | 0.0117410892   |
| AC092159.2     | 2.193511264 | 0.01210692174  |

|                |              |                |
|----------------|--------------|----------------|
| LINC00606      | -5.915208686 | 0.004529393032 |
| DACT3-AS1      | -4.634377855 | 0.004559218413 |
| LINC00205      | -1.177100916 | 0.00459041247  |
| RP3-428L16.2   | -2.843211281 | 0.004603675121 |
| RP11-478J18.2  | -5.016918499 | 0.004865294804 |
| RP11-884K10.7  | -1.241319978 | 0.005095643322 |
| TAF1A-AS1      | -1.711780788 | 0.005107535178 |
| RP11-758P17.2  | -3.714195116 | 0.00523631933  |
| LINC02001      | -1.277770011 | 0.005245208224 |
| RP4-625H18.2   | -4.934561949 | 0.005310336115 |
| RAB11B-AS1     | -2.034888011 | 0.005484735777 |
| RP11-216B9.9   | -3.234881605 | 0.00551751757  |
| RP11-139H14.5  | -4.122590574 | 0.005561575863 |
| SPATA42        | -5.071871399 | 0.005567303863 |
| RBMS3-AS3      | -2.808902002 | 0.005653211982 |
| RP11-305E6.4   | -1.44701567  | 0.005653211982 |
| PTGER4P2-CDK2A | -2.953415243 | 0.005780874326 |
| RP11-620J15.4  | -4.943769079 | 0.00581547482  |
| RP11-2E11.5    | -5.760933414 | 0.005964505308 |
| LINC01977      | -5.32261339  | 0.006111137619 |
| RP11-110I1.12  | -2.361724833 | 0.006242885529 |
| CTD-2373N4.3   | -3.131337625 | 0.006244244755 |
| ZEB2-AS1       | -4.099506045 | 0.006310215433 |
| RP4-635E18.8   | -2.277617836 | 0.006381108126 |
| LINC01778      | -2.722293474 | 0.006404109579 |
| NIFK-AS1       | -1.50979     | 0.006581792306 |
| LINC01089      | -1.256446448 | 0.006649216337 |
| RP1-101A2.1    | -2.16468442  | 0.006717658182 |
| RP11-1055B8.1  | -4.764731927 | 0.006756104393 |
| RP11-429P3.8   | -2.212538116 | 0.006911578283 |
| AC091133.1     | -1.942806565 | 0.007032716316 |
| RP11-259N19.1  | -1.551587016 | 0.007164029932 |
| NOP14-AS1      | -1.292889805 | 0.0071673344   |
| RP11-20I23.13  | -5.036447104 | 0.00719956373  |
| GABPB1-AS1     | -1.12794287  | 0.007344285083 |
| RP11-541N10.3  | -2.198334071 | 0.007432138973 |
| RP13-753N3.3   | -1.939758783 | 0.007464342372 |
| LINC01816      | -4.92710743  | 0.00747520279  |
| RP11-282O18.3  | -1.395987859 | 0.007566092326 |
| AC004893.11    | -1.505077532 | 0.00774465452  |
| RP11-303E16.2  | -1.116020249 | 0.007846086901 |
| RP3-425C14.4   | -1.847167451 | 0.008006701946 |
| RP11-277P12.9  | -4.971186188 | 0.008118670935 |
| CTD-2286N8.2   | -2.935585777 | 0.008120622619 |
| LINC01833      | -5.271226429 | 0.008201056469 |
| ERVK13-1       | -1.346821894 | 0.008245782331 |
| RP11-526I2.5   | -2.412792585 | 0.008271190894 |

|                |             |               |               |              |                |
|----------------|-------------|---------------|---------------|--------------|----------------|
| FMR1-AS1       | 3.142794257 | 0.0121972216  | RP11-472N13.2 | -4.464710927 | 0.008450219104 |
| RP11-885N19.6  | 4.896083994 | 0.01226465106 | GPR158-AS1    | -4.848467894 | 0.008553432204 |
| LINC01970      | 2.18814385  | 0.01232382156 | AC009506.1    | -1.829064139 | 0.008609605431 |
| RP11-843B15.4  | 2.063634549 | 0.01244819334 | CTC-429P9.5   | -1.447075865 | 0.008652922341 |
| LINC01239      | 3.6509458   | 0.01310638174 | CTD-2116N20.1 | -2.493858948 | 0.008759872539 |
| CTD-2319I12.2  | 2.33651796  | 0.01327537354 | AC003991.3    | -4.831684984 | 0.008761441907 |
| HCG27          | 1.663921782 | 0.01331123808 | AC002550.6    | -2.956937025 | 0.008784520128 |
| RP11-286N22.14 | 2.374173794 | 0.0134862283  | RP11-48B3.4   | -2.734011924 | 0.008835094593 |
| RP11-1398P2.1  | 4.229813996 | 0.01403510319 | RP11-318C24.2 | -4.828048624 | 0.009147507666 |
| AP000442.4     | 3.40471652  | 0.01410817025 | AC005220.3    | -5.551988115 | 0.009426543604 |
| KB-431C1.5     | 2.606676792 | 0.01425787821 | CTA-276F8.1   | -2.233223989 | 0.0094402494   |
| GACAT2         | 3.202431636 | 0.01443440693 | CTB-119C2.1   | -2.21113906  | 0.009598075674 |
| SNHG16         | 1.108452011 | 0.01444495472 | LINC01578     | -1.334542649 | 0.009873474105 |
| LINC00346      | 2.516630852 | 0.01450628056 | SATB2-AS1     | -2.516153774 | 0.009929319141 |
| LINC00882      | 2.586730527 | 0.0145691493  | CTD-2506P8.6  | -2.007486644 | 0.0100673699   |
| FLJ21408       | 1.739172781 | 0.01465495581 | RP11-259K15.2 | -5.018307458 | 0.01012902648  |
| RSF1-IT1       | 2.226558023 | 0.01476475356 | RP11-568N6.1  | -2.769320265 | 0.01017272629  |
| LINC01572      | 1.39448343  | 0.0149485061  | RP11-247A12.7 | -5.018047244 | 0.0104112034   |
| RP11-247L20.4  | 1.297895405 | 0.01499724708 | RP11-996F15.6 | -2.648966799 | 0.01063016375  |
| RP11-482G13.1  | 4.725877673 | 0.01544297214 | RP11-182L21.6 | -1.329206658 | 0.01069523342  |
| XXbac-BPG299F1 | 1.473385639 | 0.01560910182 | PDCD4-AS1     | -1.479755948 | 0.01069589917  |
| LINC00622      | 2.778829799 | 0.01561320562 | RP11-557L19.1 | -4.256984938 | 0.01075240857  |
| AC093732.1     | 4.611877005 | 0.01625136653 | RP11-131L12.2 | -4.429400759 | 0.01081304619  |
| ZFPM2-AS1      | 2.865300646 | 0.01698869866 | DLEU2L        | -1.325731708 | 0.01087992414  |
| C10orf25       | 2.148915277 | 0.01794711604 | RBM26-AS1     | -1.372105486 | 0.01108391598  |
| RP3-467K16.4   | 2.82104963  | 0.01807675308 | RP11-111K18.2 | -2.32547559  | 0.01132040195  |
| AC145343.2     | 3.750887357 | 0.01832311228 | LINC01727     | -5.094783739 | 0.01133708271  |
| AC002076.10    | 3.84241051  | 0.01842606347 | RP11-343L5.2  | -2.09831483  | 0.01136507759  |
| RP11-134G8.7   | 1.650136783 | 0.01842740977 | AC009403.2    | -1.503408273 | 0.01143030468  |
| ATP6V1B1-AS1   | 3.433189361 | 0.01890187137 | RP11-890B15.3 | -1.77508915  | 0.01149966624  |
| RP11-650K20.3  | 3.615188719 | 0.01921205146 | RP11-46H11.12 | -4.730923494 | 0.01160296881  |
| LINC02057      | 4.12147217  | 0.01929912714 | RP11-134K13.4 | -3.565316139 | 0.01160795922  |
| RP11-677M14.3  | 3.392028617 | 0.01952092811 | RP11-582J16.5 | -1.954152104 | 0.01160868639  |
| RP11-7F18.2    | 1.500458157 | 0.01960752343 | LINC02104     | -4.951757049 | 0.01162481901  |
| AC106786.1     | 4.191157465 | 0.01977993331 | WDR86-AS1     | -5.442248239 | 0.01163761728  |
| RP11-63E9.1    | 4.798029568 | 0.0198209433  | ZNF571-AS1    | -4.974764195 | 0.01170403198  |
| CH507-154B10.1 | 1.455764363 | 0.02028470541 | AC093642.1    | -2.599684197 | 0.01172659291  |
| CTD-2337A12.1  | 4.537149604 | 0.02032954731 | AC005519.4    | -1.765263623 | 0.01181083695  |
| LINC02086      | 2.70406007  | 0.0208398748  | RP11-456K23.1 | -5.421627125 | 0.0118534843   |
| RP3-460G2.2    | 2.392090466 | 0.02127348231 | CTC-498J12.1  | -4.715600867 | 0.01241394295  |
| ITGB2-AS1      | 4.593664851 | 0.0216808998  | HCG22         | -5.376293427 | 0.01290859019  |
| SEMA6A-AS1     | 1.611079106 | 0.02188255209 | RP11-395A13.2 | -2.110592624 | 0.01298823947  |
| RP11-14N7.2    | 4.478142569 | 0.02225577315 | LINC01505     | -3.330138445 | 0.01312200277  |
| CTC-338M12.4   | 1.275170231 | 0.02234600247 | AL022393.9    | -2.869433763 | 0.0131653149   |
| RP11-297A16.2  | 4.19827412  | 0.02245840739 | LEF1-AS1      | -4.864527245 | 0.01317131543  |
| RP11-84D1.1    | 4.552179696 | 0.02250465587 | RP11-496I9.1  | -2.981307848 | 0.01322938674  |
| PRKCQ-AS1      | 1.210084497 | 0.02254512085 | LINC01132     | -4.971933474 | 0.01375764852  |

|                |             |               |
|----------------|-------------|---------------|
| AC005754.8     | 2.282792454 | 0.02300016749 |
| AP001372.2     | 1.140514682 | 0.02328766813 |
| AC053503.4     | 2.784715264 | 0.02356068188 |
| SOCS2-AS1      | 2.678361743 | 0.02356068188 |
| MIR4500HG      | 3.170335241 | 0.02370021912 |
| XXbac-BPG181B2 | 3.435231655 | 0.02374267554 |
| CTD-2540B15.10 | 3.480146378 | 0.02462087006 |
| RP11-122K13.12 | 1.829609781 | 0.02484619539 |
| RP11-736K20.5  | 2.270516973 | 0.02522601544 |
| RP11-423H2.3   | 2.618659719 | 0.02526481134 |
| RP11-297N6.4   | 3.098554344 | 0.02583155998 |
| RP13-455A7.1   | 4.448132981 | 0.02606312664 |
| RP1-266L20.2   | 4.485001717 | 0.0262392154  |
| AC116609.2     | 2.735095742 | 0.02625603682 |
| RP11-455F15.1  | 4.180136384 | 0.0263973349  |
| RP11-259K5.2   | 1.403386795 | 0.02701010484 |
| RP11-533E19.7  | 1.648595301 | 0.02704133112 |
| CTC-453G23.8   | 2.202087822 | 0.02768265983 |
| CTB-131B5.5    | 1.750013657 | 0.02837920971 |
| RP11-77P6.2    | 1.167662649 | 0.02866036952 |
| RP11-235E17.6  | 2.055833607 | 0.02879479414 |
| RP11-375I20.6  | 2.511867114 | 0.02888306097 |
| EBLN3P         | 1.252644577 | 0.02907481304 |
| TMLHE-AS1      | 3.187322844 | 0.02935365836 |
| SNHG12         | 1.162502945 | 0.0297142304  |
| RP11-54C4.3    | 1.722094744 | 0.02973853888 |
| GATA6-AS1      | 3.995721576 | 0.03019054622 |
| AD000864.6     | 4.372146893 | 0.03034770741 |
| RP3-467K16.7   | 4.411508278 | 0.03040004781 |
| TMEM9B-AS1     | 1.529967684 | 0.03058264342 |
| STARD4-AS1     | 1.96123643  | 0.03065540496 |
| RP11-481J2.3   | 1.653053125 | 0.03115767131 |
| RP11-501C14.5  | 4.024117001 | 0.03129581396 |
| CRYM-AS1       | 2.390710586 | 0.03146325358 |
| RP11-239A17.1  | 4.321337041 | 0.0318658036  |
| FOXC2-AS1      | 4.53987788  | 0.0319408992  |
| WFDC21P        | 4.438280554 | 0.03299355355 |
| OTUD6B-AS1     | 1.051572853 | 0.03304121069 |
| AP001258.4     | 1.046833372 | 0.03309785096 |
| RP11-95P2.3    | 4.311069376 | 0.033131005   |
| RP11-497E19.1  | 4.428545803 | 0.03337487315 |
| RP5-901A4.1    | 1.916525277 | 0.03360784306 |
| PSMD6-AS2      | 1.072555648 | 0.03431800531 |
| RP11-715F3.2   | 1.601567836 | 0.03436347478 |
| RP11-351I24.1  | 2.562296038 | 0.03437842433 |
| RP11-79H23.3   | 4.299504049 | 0.03483550597 |
| RP11-888D10.3  | 2.41165358  | 0.03533741854 |

|                |              |               |
|----------------|--------------|---------------|
| RP11-48G14.2   | -4.684513252 | 0.01381711614 |
| RP11-9N12.2    | -4.684513252 | 0.01381711614 |
| RP11-50D16.4   | -4.651213362 | 0.01382833228 |
| RP11-848P1.5   | -2.669653108 | 0.01383247188 |
| RP5-1065J22.8  | -1.649678346 | 0.01386497538 |
| AC000403.4     | -2.741311201 | 0.01391242411 |
| RP11-332H14.2  | -1.111480965 | 0.01399112789 |
| RP5-1136G13.2  | -1.599171771 | 0.01401653329 |
| RP11-350N15.6  | -3.047191588 | 0.01423488913 |
| CTB-105N12.2   | -4.983529656 | 0.0143183238  |
| LINC00648      | -4.645172685 | 0.01450753403 |
| RP11-390E23.6  | -1.171112194 | 0.01455555821 |
| RP11-1134I14.8 | -4.652330353 | 0.01471688999 |
| AP000473.5     | -3.704294737 | 0.01474654732 |
| RP11-231G15.3  | -4.811260988 | 0.0149979938  |
| LMCD1-AS1      | -2.605152147 | 0.01511098396 |
| CTB-36H16.2    | -2.200069423 | 0.01540239574 |
| RP3-333H23.9   | -1.682743633 | 0.01550077249 |
| MEG9           | -5.272678764 | 0.01572805843 |
| RP11-758H9.2   | -1.607081423 | 0.0160937755  |
| AE000661.37    | -5.261994157 | 0.01613549692 |
| LOH12CR2       | -1.67691758  | 0.01636598428 |
| AC010883.5     | -2.094717492 | 0.01690504352 |
| RP11-380B4.3   | -2.439577585 | 0.01705551462 |
| RP11-81H14.1   | -4.806787285 | 0.01719813169 |
| CTC-360G5.9    | -2.368500479 | 0.01720457727 |
| RP11-796E2.4   | -2.760083635 | 0.01723144724 |
| LINC01410      | -1.678064504 | 0.0174400882  |
| RP11-428J1.4   | -2.3268122   | 0.01789964346 |
| CTA-246H3.12   | -4.798251726 | 0.0179619574  |
| PAXBP1-AS1     | -1.862069318 | 0.01803800624 |
| RP11-627G23.1  | -4.609350113 | 0.01814637299 |
| RP11-257P3.3   | -4.876959069 | 0.01823445458 |
| LINC01085      | -3.70779577  | 0.01823959845 |
| AC009166.7     | -5.201731791 | 0.01837383149 |
| LINC00294      | -1.095938356 | 0.01855474263 |
| CTC-366B18.4   | -2.093559034 | 0.01865539229 |
| RP11-260M2.1   | -1.318083794 | 0.01886728818 |
| RP11-749I16.3  | -2.217730829 | 0.01887511345 |
| CTB-152G17.6   | -1.643327484 | 0.01890152822 |
| RP11-448A19.1  | -1.219705379 | 0.01918016334 |
| AC108488.4     | -1.73751869  | 0.01934800273 |
| RP11-351J23.1  | -4.495981675 | 0.0196358903  |
| RP11-16P20.4   | -4.810891092 | 0.01992404833 |
| RP11-1109F11.5 | -2.273051173 | 0.01998900498 |
| RP11-403A3.1   | -4.659595147 | 0.02001479214 |
| LINC01549      | -4.572397451 | 0.02015732158 |

|                |             |               |
|----------------|-------------|---------------|
| RP11-366F6.2   | 4.34276227  | 0.03550164201 |
| RP11-1228E12.1 | 1.830938095 | 0.03593843095 |
| RP11-81A1.6    | 1.075472397 | 0.03620001818 |
| RP13-895J2.3   | 3.993426306 | 0.03644455666 |
| RP11-73K9.2    | 1.107972094 | 0.03647433494 |
| RP11-43F13.4   | 3.285308497 | 0.03697037675 |
| RP11-1020A11.2 | 1.888200393 | 0.03727368249 |
| RP11-406H4.1   | 4.286387948 | 0.03756156167 |
| CTD-2341M24.1  | 1.475568801 | 0.03769661099 |
| RP11-277B15.3  | 2.004144709 | 0.03781760213 |
| AC092168.2     | 3.869228131 | 0.03823486444 |
| SCOC-AS1       | 1.415130662 | 0.0385734574  |
| LINP1          | 3.012624307 | 0.03934463347 |
| AP000442.1     | 1.819045455 | 0.03934463347 |
| ERICH6-AS1     | 1.601404055 | 0.03938598822 |
| RP11-44N22.3   | 2.451911166 | 0.03951878733 |
| CTC-529P8.1    | 2.519627515 | 0.03979660975 |
| RP11-810P12.7  | 2.392211464 | 0.03989634644 |
| RP13-349O20.2  | 1.41595205  | 0.04007012692 |
| RP11-54O7.18   | 4.304917175 | 0.0404314925  |
| RP11-380G5.2   | 3.144009804 | 0.04066267001 |
| RP11-438D8.2   | 4.218401032 | 0.04088791089 |
| RP11-66N24.3   | 1.113943438 | 0.04105688984 |
| LINC00896      | 4.25843734  | 0.04124060309 |
| RP11-150C16.1  | 3.321742726 | 0.04124693278 |
| RP4-607I7.1    | 2.803939029 | 0.04132568467 |
| RP11-108M9.3   | 4.217755779 | 0.04135778809 |
| RP11-330O11.3  | 1.84891761  | 0.04168350781 |
| AC012456.4     | 3.658464197 | 0.04192439519 |
| RP11-350J20.5  | 3.028697357 | 0.04207796074 |
| RP11-532M24.1  | 2.8707048   | 0.04210636138 |
| RP11-525A16.4  | 3.533212305 | 0.04257278328 |
| AC091878.1     | 4.248277103 | 0.04292114517 |
| RP3-523K23.2   | 4.203013618 | 0.04340980105 |
| LINC01376      | 1.365574836 | 0.04341651479 |
| CTD-2616J11.16 | 3.779180972 | 0.04453057161 |
| RP11-666A20.4  | 4.199150077 | 0.04500514622 |
| SSSCA1-AS1     | 1.198465235 | 0.04549432814 |
| LINC00466      | 2.60243764  | 0.04580605729 |
| ZEB1-AS1       | 1.400077752 | 0.0460241598  |
| RP11-799D4.4   | 2.484736958 | 0.04605572258 |
| LINC01232      | 1.268280286 | 0.04613359129 |
| RP11-763B22.4  | 4.23049027  | 0.04623083657 |
| RP11-255E6.6   | 4.187792162 | 0.04629119587 |
| CTD-2616J11.2  | 2.356376529 | 0.0466112716  |
| RP11-360O19.4  | 4.227441386 | 0.04688807227 |
| RP11-429J17.7  | 3.84532819  | 0.04698622317 |

|                 |              |               |
|-----------------|--------------|---------------|
| LINC01503       | -3.739534837 | 0.02029372027 |
| AC074391.1      | -3.969413731 | 0.02052388547 |
| RP1-86C11.7     | -2.953936931 | 0.02056099504 |
| RP11-263K19.4   | -2.442177897 | 0.02069675234 |
| LINC00856       | -3.714459878 | 0.02076114267 |
| CH17-262A2.1    | -2.550560831 | 0.02078054112 |
| RP11-387M24.5   | -4.518544328 | 0.02134639103 |
| AC006116.24     | -4.602989578 | 0.02136451585 |
| RP11-1055B8.4   | -1.750344036 | 0.02152849722 |
| ZIM2-AS1        | -5.728487225 | 0.02157254241 |
| RP11-342K6.4    | -4.385682779 | 0.0221367623  |
| RP11-265E18.1   | -3.28672003  | 0.02214553784 |
| AC006026.13     | -4.479051824 | 0.02214956939 |
| RP11-1263C18.1  | -5.088165351 | 0.0222210514  |
| AC147651.4      | -2.346840133 | 0.02236941137 |
| RP11-632L2.2    | -2.839659583 | 0.0224747888  |
| KIF9-AS1        | -2.115428858 | 0.02255149604 |
| CTA-363E19.2    | -2.28344642  | 0.02266258966 |
| LINC01579       | -5.63619742  | 0.02270412626 |
| CTC-471J1.2     | -2.610533659 | 0.02304810569 |
| AC013460.1      | -3.941300567 | 0.02315678997 |
| RP11-506K6.4    | -5.165760808 | 0.02351283909 |
| RP11-415J8.7    | -4.194523533 | 0.0236786889  |
| SMC5-AS1        | -1.897243206 | 0.02369980112 |
| FAM182A         | -3.610013261 | 0.02387122837 |
| RP11-266K4.9    | -4.240484463 | 0.02410366745 |
| SEMA6A-AS2      | -3.304025762 | 0.02410976757 |
| RP11-690D19.3   | -1.169963848 | 0.02426667977 |
| LINC01176       | -2.557288743 | 0.02431191476 |
| AC005592.3      | -2.891919018 | 0.02450292679 |
| MAFTRR          | -4.19633104  | 0.02455506531 |
| RP11-402D21.2   | -2.199728472 | 0.02464133448 |
| RP11-161M6.6    | -2.786670968 | 0.02470335821 |
| AC083867.4      | -4.653553283 | 0.02528750154 |
| LA16c-313D11.12 | -2.757496698 | 0.0254956113  |
| CTC-487M23.6    | -1.69272911  | 0.02564487108 |
| RP11-767N6.7    | -1.718742998 | 0.02577956814 |
| RP11-465C12.1   | -4.999887627 | 0.02589483178 |
| AC009473.1      | -2.9445404   | 0.02598977373 |
| MEOX2-AS1       | -5.001717284 | 0.02608338642 |
| LINC01351       | -2.878391493 | 0.0262392154  |
| SNHG11          | -1.126572362 | 0.02635014089 |
| COLCA1          | -4.48488505  | 0.02648659538 |
| BBOX1-AS1       | -4.343046929 | 0.026520623   |
| AC008088.4      | -4.415163761 | 0.02682158665 |
| RP11-386G11.8   | -4.980436546 | 0.02682216905 |
| RP11-103J8.1    | -4.62662294  | 0.02702386982 |

|               |             |               |
|---------------|-------------|---------------|
| RP11-498P14.5 | 2.081135395 | 0.04765588714 |
| AC007879.3    | 2.990029833 | 0.04801605006 |
| RP11-473M10.3 | 4.224174443 | 0.04813156201 |
| RP11-321L2.1  | 3.216843551 | 0.04848793487 |
| RP1-179N16.6  | 1.310811807 | 0.04867548494 |
| CTD-2334D19.1 | 4.331422054 | 0.04916671913 |
| RP11-89F3.2   | 3.75747999  | 0.04956146826 |
| RP11-300E4.2  | 4.126787633 | 0.04989447671 |

|                |              |               |
|----------------|--------------|---------------|
| RP11-173P15.9  | -3.052212839 | 0.02761667489 |
| RGMB-AS1       | -2.82462874  | 0.02763328829 |
| UG0898H09      | -5.411559902 | 0.02770926109 |
| LINC01679      | -4.497326429 | 0.02812941459 |
| AP000662.4     | -2.885341154 | 0.02812941459 |
| LINC01126      | -1.767347444 | 0.02835847673 |
| RP11-615I2.2   | -4.365796099 | 0.02857671418 |
| RP11-762I7.4   | -2.278249563 | 0.02883168565 |
| RP11-73M18.7   | -1.140167638 | 0.02883168565 |
| RP11-4B14.3    | -4.355487064 | 0.02886202535 |
| RP11-631N16.2  | -1.085770273 | 0.02886266936 |
| DICER1-AS1     | -1.364817281 | 0.0292484033  |
| CTD-2081C10.7  | -3.434787641 | 0.02930132666 |
| RP11-727F15.11 | -4.118654448 | 0.02948834621 |
| RAPGEF4-AS1    | -4.937860174 | 0.02950265689 |
| LACTB2-AS1     | -4.286377731 | 0.02964744196 |
| AC007255.8     | -3.502363755 | 0.03069365847 |
| CTB-25B13.5    | -2.348980938 | 0.03093578474 |
| RP1-79C4.4     | -4.442624133 | 0.03125269414 |
| RP11-977G19.5  | -1.031585015 | 0.03128250069 |
| RP11-594N15.3  | -2.363080029 | 0.03129911619 |
| RP11-329B9.5   | -3.129805678 | 0.03139442107 |
| RP11-101E13.5  | -1.556053153 | 0.03164908581 |
| RP11-536C5.2   | -4.323396763 | 0.03165134489 |
| RP11-4L24.4    | -1.128201374 | 0.03186785628 |
| RP11-426D19.1  | -3.920727587 | 0.03202164348 |
| RP11-156P1.3   | -1.092878188 | 0.03206607327 |
| RP5-981O7.2    | -2.847910582 | 0.03218753862 |
| AP000704.5     | -2.044727445 | 0.03219449816 |
| LINC01080      | -4.462752051 | 0.03219449816 |
| AP001626.2     | -2.759241704 | 0.03227373944 |
| CTC-463A16.1   | -2.200716717 | 0.03229865297 |
| AC025171.1     | -1.521519352 | 0.03242846035 |
| RP11-445N18.5  | -4.872461677 | 0.03250247295 |
| RP11-723J4.3   | -2.86558885  | 0.03250247295 |
| RP11-127B20.2  | -3.268284733 | 0.03252835712 |
| CTD-2017F17.2  | -1.890797922 | 0.03272478463 |
| RP11-372K14.2  | -2.734014231 | 0.03299355355 |
| CTD-2349P21.9  | -1.653768305 | 0.03302221907 |
| RP11-283G6.4   | -3.20224338  | 0.03358664258 |
| KB-318B8.7     | -1.944256244 | 0.03362102375 |
| FAM13A-AS1     | -1.68370732  | 0.0336246098  |
| ZNF663P        | -4.320542161 | 0.03395267252 |
| RP11-15I11.3   | -3.567386603 | 0.03422589494 |
| RP11-576I22.2  | -2.829342613 | 0.03429533444 |
| CTD-2339F6.1   | -5.01173296  | 0.03435862537 |
| HIF1A-AS1      | -2.767681274 | 0.03452866598 |



|                |              |               |
|----------------|--------------|---------------|
| RP11-358L22.3  | -1.863561675 | 0.03475279743 |
| CTD-2267D19.3  | -2.037278158 | 0.03477260771 |
| MIR181A1HG     | -3.345085444 | 0.03482068087 |
| PINK1-AS       | -1.057937569 | 0.0349061461  |
| RP11-120K24.3  | -4.292761346 | 0.03502009568 |
| RP11-309L24.10 | -4.367741678 | 0.03528179292 |
| RP11-454E5.4   | -1.72255704  | 0.03528179292 |
| RP11-649E7.5   | -2.509432048 | 0.0354452056  |
| RP11-138I1.3   | -4.407859811 | 0.0354452056  |
| RP11-455O6.8   | -3.389333778 | 0.0354606177  |
| RP11-155D18.13 | -2.850027708 | 0.03549900072 |
| RP11-966I7.4   | -4.833089133 | 0.03566957238 |
| RP11-624M8.1   | -3.838254014 | 0.03567976326 |
| RP11-21L23.2   | -1.641763783 | 0.03587147586 |
| RP11-798M19.3  | -1.580474485 | 0.03616799772 |
| LINC00342      | -1.17401864  | 0.0362703262  |
| RP11-109E12.1  | -4.346789663 | 0.03650719876 |
| DGCR11         | -1.522625147 | 0.03660919963 |
| RP11-146D12.2  | -2.33503296  | 0.03686205144 |
| LINC00598      | -3.25721974  | 0.03740130574 |
| CTC-487M23.5   | -1.617480029 | 0.03788049924 |
| RP11-503P10.1  | -2.93979721  | 0.03808119036 |
| RP11-46C24.7   | -1.453625372 | 0.03839689006 |
| CTB-179K24.3   | -3.105323631 | 0.03897929109 |
| RP11-274H2.5   | -1.774968806 | 0.03902359236 |
| RP11-407G23.5  | -1.162246303 | 0.0391767662  |
| RP11-180M15.6  | -3.830464148 | 0.03990378392 |
| CA3-AS1        | -3.408899148 | 0.04007012692 |
| SATB1-AS1      | -4.265492318 | 0.04023208631 |
| RP11-362K14.6  | -1.798464724 | 0.04032130625 |
| RP11-76I23.7   | -2.909154172 | 0.04051247153 |
| CTD-2619J13.3  | -3.870494129 | 0.04066267001 |
| FBXL19-AS1     | -1.214368531 | 0.04067420231 |
| SEPT7-AS1      | -1.273688927 | 0.04070666908 |
| C22orf24       | -3.362164712 | 0.04078140421 |
| CTC-325H20.8   | -4.379620268 | 0.04129163677 |
| RP11-431M7.3   | -4.378161653 | 0.04183496363 |
| RP11-84G21.1   | -1.530244352 | 0.04196204402 |
| LINC01206      | -4.551707684 | 0.04221773341 |
| LINC01852      | -1.687920867 | 0.0426691845  |
| WEE2-AS1       | -1.371126783 | 0.04272802559 |
| AP000432.1     | -1.255746825 | 0.0431367002  |
| NFIA-AS2       | -4.690934248 | 0.04341261462 |
| RP11-685N10.1  | -1.873748264 | 0.04343756073 |
| RP11-226L15.5  | -1.156051126 | 0.04355089618 |
| RP5-884C9.2    | -4.67028136  | 0.04372566592 |
| RP11-770J1.3   | -1.978003662 | 0.04376810314 |

|               |              |               |
|---------------|--------------|---------------|
| RP11-500G22.4 | -4.213399087 | 0.04400849013 |
| LINC00519     | -4.174203244 | 0.04414826492 |
| RP11-712B9.2  | -1.681867447 | 0.04438495977 |
| POC1B-AS1     | -1.487207304 | 0.04446223563 |
| AGPAT4-IT1    | -1.387935733 | 0.04454139494 |
| RP11-359B12.2 | -1.014373795 | 0.04585671536 |
| U47924.31     | -2.014400185 | 0.04592004515 |
| CTC-344H19.4  | -3.534171212 | 0.046018976   |
| AC007566.10   | -1.014212726 | 0.04603914804 |
| RNF219-AS1    | -4.287346862 | 0.04607192115 |
| LINC02082     | -2.0766378   | 0.04636223328 |
| NCK1-AS1      | -1.304319419 | 0.04651237249 |
| CCND2-AS1     | -3.947812765 | 0.04700024178 |
| RP11-445N20.2 | -2.679775    | 0.04734839073 |
| RP11-73M18.6  | -1.485525302 | 0.04735323094 |
| LINC01686     | -4.286835057 | 0.04863535485 |
| LINC01252     | -2.073475688 | 0.04871208694 |
| RP11-390P24.1 | -1.435312492 | 0.04924716103 |
| RP5-994D16.3  | -2.841919319 | 0.04942585422 |
| SPRY4-IT1     | -1.766620564 | 0.04966854642 |

**Supplementary Table 20:** Highly expressed lncRNAs in mesenchymal (MES) and proneural (PN) GSCs ( $\log_2FC > 3$  and  $FDR < 0.05$ ), with expression differences between MES and PN GBM ( $|\log_2FC| > 0$ ).

| Highly expressed lncRNAs in MES |             |          |            |
|---------------------------------|-------------|----------|------------|
| lncRNA                          | log2FC.GSCs | FDR.GSCs | log2FC.GBM |
| ADIRF-AS1                       | 8.1469      | 3.93E-36 | 0.3091     |
| MIR222HG                        | 4.0647      | 3.46E-23 | 1.4048     |
| RP11-66B24.7                    | 8.9782      | 8.13E-23 | 0.1959     |
| RP11-420A23.1                   | 3.6846      | 4.13E-19 | 0.0518     |
| LINC00707                       | 8.8163      | 5.03E-18 | 0.2462     |
| AC003092.1                      | 10.5004     | 3.23E-17 | 0.9782     |
| LINC00857                       | 8.3517      | 5.01E-17 | 1.1929     |
| RP5-884M6.1                     | 9.7256      | 8.11E-17 | 0.5070     |
| RP11-366H4.1                    | 10.0323     | 3.19E-16 | 1.7816     |
| RP11-108M9.4                    | 6.8084      | 8.17E-16 | 0.6520     |
| UBR5-AS1                        | 3.5689      | 1.20E-15 | 0.2129     |
| LINC00944                       | 9.8211      | 2.02E-15 | 0.3192     |
| RP11-148B18.4                   | 9.2308      | 2.71E-15 | 0.9690     |
| MSC-AS1                         | 7.9784      | 5.06E-15 | 0.2305     |
| LINC01605                       | 7.7660      | 1.00E-14 | 2.1591     |
| CASC9                           | 9.5504      | 1.20E-14 | 0.6227     |
| RP11-66B24.2                    | 9.6835      | 1.23E-14 | 0.4456     |
| CTB-140J7.2                     | 9.0559      | 1.87E-14 | 0.7548     |
| MIR137HG                        | 9.4635      | 2.91E-14 | 0.0222     |
| RP4-647C14.2                    | 9.4408      | 3.12E-14 | 0.0557     |
| LINC00910                       | 4.0521      | 4.78E-14 | 0.1676     |
| RP11-221N13.3                   | 5.2213      | 1.97E-12 | 2.3166     |
| AP001065.15                     | 8.3707      | 2.71E-12 | 0.5229     |
| CASC8                           | 7.3916      | 2.71E-12 | 1.3339     |
| KC6                             | 8.7319      | 4.18E-12 | 1.1810     |
| RP11-879F14.2                   | 7.1677      | 5.85E-12 | 0.5583     |
| LINC01615                       | 8.2440      | 1.01E-11 | 1.6496     |
| CTD-2054N24.2                   | 8.4811      | 2.59E-11 | 0.8493     |
| RP11-1149O23.3                  | 8.0683      | 3.64E-11 | 1.0466     |
| LINC00704                       | 8.7894      | 4.84E-11 | 0.5267     |
| FENDRR                          | 8.8712      | 8.73E-11 | 0.3579     |
| RP11-66B24.4                    | 8.4112      | 1.78E-10 | 0.4011     |
| RP4-756H11.3                    | 3.0534      | 4.84E-10 | 0.1755     |
| STXBP5-AS1                      | 4.8328      | 6.31E-10 | 0.1215     |
| TSPEAR-AS2                      | 7.8613      | 4.06E-09 | 0.3678     |
| LINC00941                       | 4.9017      | 5.11E-09 | 2.0703     |
| TSPEAR-AS1                      | 7.7208      | 5.64E-09 | 0.7269     |
| RP11-359K18.4                   | 3.5296      | 5.78E-09 | 0.3884     |
| RP1-102E24.8                    | 7.9476      | 6.95E-09 | 0.6986     |
| LBX2-AS1                        | 4.2131      | 8.53E-09 | 1.0162     |
| EML2-AS1                        | 4.3363      | 1.09E-08 | 0.3950     |
| RP11-809O17.1                   | 4.2873      | 1.19E-08 | 0.5444     |
| RP11-328K4.1                    | 7.6249      | 1.43E-08 | 1.4252     |
| CTD-2207P18.2                   | 7.5549      | 6.98E-08 | 1.2037     |

| Highly expressed lncRNAs in PN |             |          |            |
|--------------------------------|-------------|----------|------------|
| lncRNA                         | log2FC.GSCs | GSCs.FDR | log2FC.GBM |
| SOX2-OT                        | 9.1016      | 5.55E-43 | 0.3283     |
| LINC00511                      | 4.7276      | 8.94E-35 | 0.6536     |
| LINC00665                      | 6.5084      | 2.47E-32 | 0.3358     |
| LINC00461                      | 4.0718      | 3.20E-25 | 0.3884     |
| AC074289.1                     | 6.6117      | 5.13E-20 | 0.2217     |
| AC018647.3                     | 10.6295     | 1.29E-16 | 0.4354     |
| HAGLR                          | 10.3761     | 1.88E-16 | 1.2307     |
| SOX21-AS1                      | 10.6784     | 4.24E-16 | 0.3024     |
| RP11-210M15.2                  | 7.9611      | 2.74E-15 | 0.0025     |
| MEG3                           | 9.8841      | 3.89E-15 | 0.4281     |
| RP11-161M6.2                   | 9.8620      | 4.74E-15 | 2.0987     |
| ZNF528-AS1                     | 10.3361     | 2.16E-14 | 0.6251     |
| RP11-275H4.1                   | 9.0764      | 3.29E-14 | 1.5444     |
| LINC01896                      | 8.7173      | 5.77E-13 | 1.0336     |
| CASC15                         | 9.3361      | 1.20E-12 | 0.9993     |
| RP3-525N10.2                   | 6.6601      | 1.23E-12 | 0.9506     |
| RP11-629G13.1                  | 8.3794      | 1.00E-11 | 0.2281     |
| AC108142.1                     | 8.9199      | 1.48E-11 | 0.3438     |
| LINC01268                      | 8.6508      | 3.20E-11 | 1.0059     |
| RP11-436K8.1                   | 9.1534      | 3.66E-11 | 0.9481     |
| RP5-882C2.2                    | 3.1466      | 1.50E-10 | 0.2545     |
| MIAT                           | 7.6341      | 1.63E-10 | 1.3584     |
| AC114730.3                     | 8.5402      | 3.82E-10 | 1.4959     |
| RP11-444D3.1                   | 8.2187      | 4.12E-10 | 0.5984     |
| CTC-559E9.5                    | 8.3450      | 6.27E-10 | 0.2682     |
| CTC-260E6.6                    | 8.0306      | 1.49E-09 | 1.0055     |
| FAM212B-AS1                    | 6.8176      | 3.47E-09 | 1.1393     |
| LINC02199                      | 7.5342      | 5.40E-09 | 1.4736     |
| LINC01550                      | 8.0856      | 7.55E-09 | 0.1503     |
| ZNF582-AS1                     | 7.9035      | 9.86E-09 | 0.0312     |
| LINC01535                      | 7.5876      | 1.12E-08 | 0.4357     |
| LINC00403                      | 7.6991      | 1.72E-08 | 1.1060     |
| CTD-2291D10.4                  | 7.6979      | 2.78E-08 | 0.9282     |
| RP11-448P19.1                  | 8.4664      | 2.88E-08 | 1.0048     |
| RP11-472N13.3                  | 7.8359      | 4.56E-08 | 0.4240     |
| LINC01105                      | 8.2108      | 4.78E-08 | 1.7989     |
| PTPRD-AS1                      | 7.5183      | 5.39E-08 | 0.6054     |
| RAMP2-AS1                      | 8.6078      | 8.64E-08 | 0.8693     |
| LINC01415                      | 8.3713      | 1.48E-07 | 0.2638     |
| HAND2-AS1                      | 7.8711      | 1.90E-07 | 2.2214     |
| CTC-543D15.8                   | 7.5218      | 2.35E-07 | 0.3541     |
| ZNF790-AS1                     | 7.2818      | 2.38E-07 | 0.2634     |
| CTD-2017D11.1                  | 3.9601      | 2.97E-07 | 0.3026     |
| LINC00391                      | 7.1464      | 5.71E-07 | 0.0841     |

|                 |        |          |        |               |        |          |        |
|-----------------|--------|----------|--------|---------------|--------|----------|--------|
| UPK1A-AS1       | 7.0642 | 6.99E-08 | 0.3433 | AC010729.1    | 7.2602 | 5.96E-07 | 1.2802 |
| CTD-2587H24.5   | 7.5136 | 7.00E-08 | 0.8124 | RP11-617F23.1 | 3.1248 | 6.90E-07 | 0.1808 |
| CTD-2066L21.3   | 6.2857 | 7.90E-08 | 0.4591 | RP11-966I7.2  | 7.1963 | 1.09E-06 | 0.2390 |
| LINC00623       | 3.5339 | 9.56E-08 | 0.4518 | RP11-25K19.1  | 5.4054 | 1.31E-06 | 0.5767 |
| RP11-89C3.4     | 7.9437 | 1.01E-07 | 0.4637 | RP11-4O1.2    | 4.6150 | 1.45E-06 | 0.0759 |
| LINC01162       | 7.2061 | 1.50E-07 | 0.1691 | GS1-24F4.2    | 6.7798 | 1.45E-06 | 0.9853 |
| LINC00702       | 6.8199 | 1.58E-07 | 0.6697 | AP002954.3    | 3.3516 | 1.87E-06 | 0.7650 |
| CTD-2311M21.3   | 7.2206 | 1.59E-07 | 1.1687 | H19           | 5.5332 | 2.07E-06 | 1.7596 |
| CTD-2303H24.2   | 4.7042 | 1.86E-07 | 0.3725 | RP11-126K1.6  | 3.7305 | 3.98E-06 | 0.5977 |
| EGFR-AS1        | 7.4675 | 2.19E-07 | 0.5094 | AC078842.3    | 6.3127 | 5.01E-06 | 0.0614 |
| OSMR-AS1        | 4.8488 | 7.28E-07 | 0.7150 | AC064875.2    | 8.2687 | 5.72E-06 | 0.3105 |
| AC156455.1      | 4.6873 | 1.04E-06 | 0.0966 | RP11-742D12.2 | 6.6005 | 6.20E-06 | 0.8636 |
| LINC00659       | 6.3653 | 1.52E-06 | 0.3604 | LINCR-0001    | 3.5838 | 7.15E-06 | 1.0618 |
| RP13-463N16.6   | 7.1209 | 1.64E-06 | 2.5390 | AC073343.13   | 3.8178 | 7.97E-06 | 0.6155 |
| PLBD1-AS1       | 6.9117 | 1.87E-06 | 0.8031 | LINC01224     | 6.9425 | 8.32E-06 | 1.7384 |
| LINC01036       | 6.8181 | 2.35E-06 | 0.0464 | RP11-834C11.4 | 6.1942 | 9.19E-06 | 0.2289 |
| LINC01273       | 5.6801 | 2.37E-06 | 0.6387 | RP11-351J23.2 | 7.0082 | 1.41E-05 | 0.3510 |
| RP11-402J6.1    | 6.7575 | 2.72E-06 | 0.0069 | PROX1-AS1     | 6.4834 | 1.45E-05 | 0.0064 |
| RP11-519M16.1   | 6.6977 | 2.85E-06 | 0.1023 | U52111.14     | 5.2091 | 1.56E-05 | 0.2236 |
| LINC00460       | 3.7294 | 3.14E-06 | 2.3430 | RP11-268J15.5 | 3.1991 | 1.80E-05 | 0.0660 |
| RP11-49I11.1    | 3.6175 | 3.44E-06 | 1.2360 | C8orf31       | 6.7142 | 1.88E-05 | 0.2861 |
| RP11-326A19.4   | 4.3692 | 4.03E-06 | 0.2700 | RP11-174J11.1 | 6.3288 | 2.05E-05 | 0.6565 |
| RP11-403I13.5   | 6.6077 | 5.12E-06 | 0.7373 | RP13-942N8.1  | 3.2657 | 2.40E-05 | 0.5635 |
| RP11-802E16.3   | 3.8291 | 5.16E-06 | 1.3231 | CH17-408M7.1  | 6.2584 | 2.57E-05 | 0.2412 |
| RP1-28O10.1     | 6.7406 | 5.65E-06 | 0.7849 | RP11-120J1.1  | 3.9745 | 3.13E-05 | 0.8404 |
| LINC01037       | 6.2703 | 6.20E-06 | 0.2627 | ZNF793-AS1    | 6.7548 | 3.80E-05 | 0.9097 |
| LINC01703       | 3.0634 | 7.75E-06 | 0.3237 | CTD-2049O4.1  | 7.3214 | 4.22E-05 | 0.8453 |
| LINC01186       | 6.3373 | 7.82E-06 | 0.7758 | AC004540.4    | 6.2826 | 4.39E-05 | 0.5345 |
| DNAH17-AS1      | 6.6714 | 8.96E-06 | 0.0229 | SLC26A4-AS1   | 5.4537 | 6.07E-05 | 0.4367 |
| GAPLINC         | 6.4889 | 9.04E-06 | 0.9181 | RP11-582J16.4 | 4.9402 | 6.60E-05 | 0.1800 |
| LL22NC03-86G7.1 | 4.7270 | 9.25E-06 | 0.0689 | RP11-625L16.1 | 6.2400 | 6.85E-05 | 1.8692 |
| AC073130.3      | 6.4422 | 9.95E-06 | 0.4121 | LINC00326     | 6.3146 | 9.07E-05 | 0.1436 |
| RP11-54A9.1     | 7.4821 | 1.12E-05 | 0.8459 | LINC00664     | 7.0364 | 9.29E-05 | 0.8471 |
| RP5-1139I1.1    | 6.9312 | 1.15E-05 | 0.8711 | AC108025.2    | 6.0174 | 0.0001   | 1.2788 |
| RP11-162D16.2   | 6.4031 | 1.33E-05 | 0.1711 | CTD-2380F24.1 | 5.9619 | 0.0001   | 1.4868 |
| RP11-60A8.1     | 7.0596 | 1.42E-05 | 0.5194 | HAS2-AS1      | 4.0856 | 0.0001   | 0.1556 |
| RP11-134G8.5    | 3.1272 | 1.71E-05 | 0.4168 | LINC00844     | 6.5062 | 0.0001   | 0.8353 |
| RP13-977J11.2   | 4.1660 | 2.22E-05 | 0.1019 | HOXD-AS2      | 5.9413 | 0.0002   | 0.7560 |
| SENCR           | 6.0854 | 2.56E-05 | 0.5495 | LINC00977     | 6.2199 | 0.0002   | 0.1053 |
| HIF1A-AS2       | 6.4048 | 3.20E-05 | 0.9386 | RP11-231C18.1 | 6.0200 | 0.0002   | 1.6517 |
| RP11-527N22.2   | 5.3391 | 3.42E-05 | 1.8606 | AC073283.4    | 5.9773 | 0.0002   | 1.1089 |
| CTC-378H22.1    | 6.5346 | 3.76E-05 | 0.7747 | FOXG1-AS1     | 6.0182 | 0.0002   | 0.4371 |
| RP11-686D22.8   | 6.1985 | 3.99E-05 | 0.6303 | TNKS2-AS1     | 3.7280 | 0.0003   | 0.3557 |
| AC012485.2      | 5.9237 | 4.79E-05 | 0.1723 | RP11-698N11.2 | 5.9051 | 0.0003   | 0.7841 |
| AC007879.5      | 3.0746 | 4.97E-05 | 0.6479 | LINC01748     | 5.1733 | 0.0003   | 0.7891 |
| AC073130.1      | 6.1266 | 7.07E-05 | 1.0471 | AC007204.2    | 6.2085 | 0.0003   | 1.1527 |
| RP11-280G9.1    | 6.1710 | 7.41E-05 | 1.0562 | RP11-838N2.5  | 6.0375 | 0.0003   | 0.4641 |
| MYOSLID         | 6.2516 | 8.30E-05 | 2.1396 | LINC01630     | 5.6072 | 0.0005   | 1.7337 |
| RP11-818F20.5   | 5.8374 | 8.44E-05 | 1.0722 | AC017104.6    | 3.3167 | 0.0006   | 0.4561 |

|                 |        |          |        |               |        |        |        |
|-----------------|--------|----------|--------|---------------|--------|--------|--------|
| RP11-336A10.5   | 6.0364 | 9.75E-05 | 0.5221 | RP11-507K2.3  | 5.7402 | 0.0006 | 0.5577 |
| RP11-61A14.1    | 5.6362 | 0.0001   | 1.1220 | HCG17         | 4.4801 | 0.0007 | 0.3996 |
| LRRC2-AS1       | 6.0330 | 0.0001   | 1.1117 | LIFR-AS1      | 3.0592 | 0.0007 | 0.3076 |
| RP11-745L13.2   | 5.9655 | 0.0002   | 1.3849 | RP11-307B6.3  | 5.2974 | 0.0008 | 0.6533 |
| RP11-43A14.1    | 4.3878 | 0.0002   | 0.0340 | MIMT1         | 6.0754 | 0.0008 | 1.6634 |
| CTD-2128A3.2    | 5.9168 | 0.0002   | 2.2835 | MESTIT1       | 6.1561 | 0.0008 | 0.1114 |
| RP11-115J23.1   | 3.5955 | 0.0002   | 1.9513 | LINC01102     | 5.9799 | 0.0009 | 1.0991 |
| RP3-414A15.2    | 5.8330 | 0.0002   | 0.5648 | LINC01158     | 3.5994 | 0.0009 | 0.3068 |
| RP11-553A21.3   | 5.6687 | 0.0002   | 0.9001 | AP000289.6    | 6.1491 | 0.0010 | 1.6762 |
| HRAT17          | 6.1954 | 0.0002   | 1.6193 | CTB-118P15.2  | 5.4817 | 0.0010 | 1.0792 |
| AC007879.2      | 4.3314 | 0.0002   | 0.7686 | CTC-467M3.1   | 5.6468 | 0.0010 | 0.5689 |
| AC006369.2      | 5.8652 | 0.0004   | 1.0435 | AC053503.11   | 5.3923 | 0.0013 | 1.8829 |
| RP11-289F5.1    | 4.9677 | 0.0004   | 0.7608 | LINC00945     | 5.5410 | 0.0013 | 0.7030 |
| CTC-378H22.2    | 5.8633 | 0.0004   | 0.7168 | RP4-657D16.3  | 3.7175 | 0.0014 | 0.3317 |
| RP11-195F19.9   | 4.4690 | 0.0004   | 0.3795 | RP11-430H10.1 | 5.5299 | 0.0017 | 0.3254 |
| AC009502.4      | 5.7300 | 0.0004   | 0.8763 | AP006222.2    | 5.4094 | 0.0017 | 0.1647 |
| A2M-AS1         | 4.1688 | 0.0005   | 0.5534 | RP11-38M8.1   | 5.9893 | 0.0018 | 0.2782 |
| LINC01611       | 5.6653 | 0.0006   | 1.3759 | MIR181A2HG    | 3.0687 | 0.0020 | 0.8415 |
| CYYR1-AS1       | 5.7963 | 0.0006   | 0.6846 | CTC-255N20.1  | 5.9100 | 0.0024 | 0.4790 |
| CFAP58-AS1      | 5.2304 | 0.0006   | 0.1410 | AP000708.1    | 5.3579 | 0.0028 | 0.1114 |
| XXyac-YX65C7_A. | 3.1524 | 0.0006   | 0.4766 | RP11-247A12.2 | 4.1691 | 0.0030 | 0.3506 |
| AP001596.6      | 3.7945 | 0.0006   | 0.6784 | RP11-620J15.1 | 5.3183 | 0.0032 | 2.0189 |
| CTD-2020K17.1   | 3.5746 | 0.0007   | 0.8740 | RP5-1024C24.1 | 5.9992 | 0.0036 | 0.8969 |
| LINC01385       | 5.2138 | 0.0008   | 1.0731 | LINC00506     | 5.2956 | 0.0039 | 0.1917 |
| LINC00887       | 4.7682 | 0.0008   | 0.7505 | RP11-281O15.4 | 5.0481 | 0.0043 | 0.6800 |
| SERTAD4-AS1     | 4.4090 | 0.0008   | 1.0354 | LINC00877     | 5.1626 | 0.0044 | 0.2446 |
| RP11-1094H24.4  | 3.4360 | 0.0010   | 0.8241 | LINC00606     | 5.9152 | 0.0045 | 0.4150 |
| RP11-399K21.14  | 3.5805 | 0.0010   | 0.4319 | DACT3-AS1     | 4.6344 | 0.0046 | 0.8437 |
| RP5-1071N3.1    | 3.2324 | 0.0011   | 0.2049 | RP11-758P17.2 | 3.7142 | 0.0052 | 0.1701 |
| RP11-379B18.5   | 3.0185 | 0.0011   | 0.2539 | RP11-216B9.9  | 3.2349 | 0.0055 | 0.5805 |
| RP11-320G24.1   | 5.4414 | 0.0011   | 0.2748 | SPATA42       | 5.0719 | 0.0056 | 0.5594 |
| MTUS2-AS1       | 4.3280 | 0.0013   | 0.6426 | RP11-620J15.4 | 4.9438 | 0.0058 | 1.7478 |
| LINC01137       | 3.2354 | 0.0014   | 0.5691 | LINC01977     | 5.3226 | 0.0061 | 1.0575 |
| AC023590.1      | 5.4404 | 0.0014   | 0.5825 | ZEB2-AS1      | 4.0995 | 0.0063 | 0.1863 |
| RP11-26J3.1     | 3.1958 | 0.0015   | 0.1676 | LINC01816     | 4.9271 | 0.0075 | 0.8473 |
| RP11-108K3.1    | 5.3599 | 0.0016   | 0.2869 | RP11-277P12.9 | 4.9712 | 0.0081 | 2.2566 |
| RP11-273G15.2   | 4.3554 | 0.0020   | 0.5344 | RP11-472N13.2 | 4.4647 | 0.0085 | 0.7597 |
| SERPINB9P1      | 4.3809 | 0.0020   | 1.1064 | GPR158-AS1    | 4.8485 | 0.0086 | 0.0642 |
| CTD-2589M5.5    | 5.0084 | 0.0020   | 0.9388 | AC003991.3    | 4.8317 | 0.0088 | 0.4532 |
| RP11-276H7.2    | 4.8640 | 0.0022   | 1.0927 | RP11-318C24.2 | 4.8280 | 0.0091 | 0.5283 |
| RP11-445O3.2    | 5.2975 | 0.0022   | 0.6116 | AC005220.3    | 5.5520 | 0.0094 | 0.1061 |
| AC137932.6      | 4.9362 | 0.0023   | 0.0407 | RP11-259K15.2 | 5.0183 | 0.0101 | 1.1989 |
| RP11-686D22.5   | 5.2272 | 0.0026   | 0.7512 | ZNF571-AS1    | 4.9748 | 0.0117 | 0.8521 |
| TARID           | 5.1318 | 0.0028   | 0.6899 | HCG22         | 5.3763 | 0.0129 | 0.2231 |
| AP000695.4      | 3.4169 | 0.0032   | 0.5572 | LINC01505     | 3.3301 | 0.0131 | 0.7594 |
| AC018816.3      | 5.1713 | 0.0032   | 0.8256 | RP11-50D16.4  | 4.6512 | 0.0138 | 0.6064 |
| RP11-565A3.2    | 5.2522 | 0.0032   | 0.2236 | LINC00648     | 4.6452 | 0.0145 | 1.5474 |
| LINC01776       | 3.9838 | 0.0037   | 0.5697 | MEG9          | 5.2727 | 0.0157 | 0.0300 |
| RP11-114H21.2   | 5.2812 | 0.0037   | 0.0537 | RP11-627G23.1 | 4.6094 | 0.0181 | 0.2903 |

|               |        |        |        |               |        |        |        |
|---------------|--------|--------|--------|---------------|--------|--------|--------|
| AC005264.2    | 5.2786 | 0.0038 | 0.9806 | RP11-351J23.1 | 4.4960 | 0.0196 | 0.5468 |
| LINC01111     | 5.5117 | 0.0045 | 1.6648 | LINC01549     | 4.5724 | 0.0202 | 0.4761 |
| RP1-137D17.1  | 5.0387 | 0.0046 | 0.2200 | ZIM2-AS1      | 5.7285 | 0.0216 | 1.0882 |
| RP11-755F10.1 | 4.2900 | 0.0049 | 0.0104 | AC006026.13   | 4.4791 | 0.0221 | 0.2633 |
| RP11-676J12.7 | 5.8714 | 0.0052 | 0.4677 | AC013460.1    | 3.9413 | 0.0232 | 1.3381 |
| AC131056.3    | 4.9942 | 0.0063 | 0.3870 | FAM182A       | 3.6100 | 0.0239 | 1.0859 |
| LINC01939     | 6.2742 | 0.0071 | 0.4192 | RP11-266K4.9  | 4.2405 | 0.0241 | 0.4630 |
| AC020571.3    | 4.5507 | 0.0072 | 1.2336 | SEMA6A-AS2    | 3.3040 | 0.0241 | 0.1935 |
| RP3-467K16.2  | 4.4681 | 0.0075 | 0.5602 | AC083867.4    | 4.6536 | 0.0253 | 1.6979 |
| AC092614.2    | 4.9414 | 0.0075 | 0.4894 | RP11-103J8.1  | 4.6266 | 0.0270 | 0.0646 |
| RP11-460B17.2 | 4.4683 | 0.0097 | 2.1640 | LINC01679     | 4.4973 | 0.0281 | 0.9819 |
| CTD-2540B15.9 | 4.0184 | 0.0099 | 0.7740 | RP11-615I2.2  | 4.3658 | 0.0286 | 1.2044 |
| SFTA1P        | 3.3467 | 0.0103 | 0.7043 | RAPGEF4-AS1   | 4.9379 | 0.0295 | 0.4769 |
| RP11-885N19.6 | 4.8961 | 0.0123 | 1.6116 | AC007255.8    | 3.5024 | 0.0307 | 0.7794 |
| LINC01239     | 3.6509 | 0.0131 | 1.4995 | RP11-536C5.2  | 4.3234 | 0.0317 | 0.8584 |
| RP11-1398P2.1 | 4.2298 | 0.0140 | 1.1099 | ZNF663P       | 4.3205 | 0.0340 | 0.6102 |
| AP000442.4    | 3.4047 | 0.0141 | 0.2809 | RP11-151I1.3  | 3.5674 | 0.0342 | 0.8645 |
| GACAT2        | 3.2024 | 0.0144 | 0.1125 | CTD-2339F6.1  | 5.0117 | 0.0344 | 1.9449 |
| AC145343.2    | 3.7509 | 0.0183 | 0.5326 | MIR181A1HG    | 3.3451 | 0.0348 | 1.0008 |
| AC002076.10   | 3.8424 | 0.0184 | 0.8643 | RP11-138I1.3  | 4.4079 | 0.0354 | 0.2193 |
| RP11-650K20.3 | 3.6152 | 0.0192 | 0.9205 | RP11-624M8.1  | 3.8383 | 0.0357 | 0.1144 |
| LINC02057     | 4.1215 | 0.0193 | 0.3934 | RP11-109E12.1 | 4.3468 | 0.0365 | 0.5169 |
| AC106786.1    | 4.1912 | 0.0198 | 0.4619 | LINC00598     | 3.2572 | 0.0374 | 0.0892 |
| CTD-2337A12.1 | 4.5371 | 0.0203 | 0.5804 | SATB1-AS1     | 4.2655 | 0.0402 | 1.0831 |
| ITGB2-AS1     | 4.5937 | 0.0217 | 0.6071 | CTD-2619J13.3 | 3.8705 | 0.0407 | 0.1729 |
| RP11-14N7.2   | 4.4781 | 0.0223 | 0.2437 | C22orf24      | 3.3622 | 0.0408 | 0.4299 |
| RP11-297A16.2 | 4.1983 | 0.0225 | 0.3901 | LINC00519     | 4.1742 | 0.0441 | 0.0473 |
| GATA6-AS1     | 3.9957 | 0.0302 | 1.2654 | CTC-344H19.4  | 3.5342 | 0.0460 | 0.2764 |
| RP3-467K16.7  | 4.4115 | 0.0304 | 1.5077 | RNF219-AS1    | 4.2873 | 0.0461 | 1.2373 |
| FOXC2-AS1     | 4.5399 | 0.0319 | 1.0709 | CCND2-AS1     | 3.9478 | 0.0470 | 0.4098 |
| WFDC21P       | 4.4383 | 0.0330 | 1.3182 |               |        |        |        |
| RP11-95P2.3   | 4.3111 | 0.0331 | 1.0244 |               |        |        |        |
| RP11-366F6.2  | 4.3428 | 0.0355 | 0.4064 |               |        |        |        |
| AC092168.2    | 3.8692 | 0.0382 | 0.6896 |               |        |        |        |
| RP11-54O7.18  | 4.3049 | 0.0404 | 0.2235 |               |        |        |        |
| RP11-438D8.2  | 4.2184 | 0.0409 | 0.2102 |               |        |        |        |
| RP11-150C16.1 | 3.3217 | 0.0412 | 0.4968 |               |        |        |        |
| RP11-350J20.5 | 3.0287 | 0.0421 | 0.1488 |               |        |        |        |
| RP11-525A16.4 | 3.5332 | 0.0426 | 1.1281 |               |        |        |        |
| RP11-666A20.4 | 4.1992 | 0.0450 | 0.1344 |               |        |        |        |
| RP11-360O19.4 | 4.2274 | 0.0469 | 0.2091 |               |        |        |        |
| CTD-2334D19.1 | 4.3314 | 0.0492 | 0.0261 |               |        |        |        |
| RP11-89F3.2   | 3.7575 | 0.0496 | 0.1548 |               |        |        |        |

**Supplementary Table 21:** TCGA tumor types considered in the lncRNAs survival analyses.

| <b>Tumor type</b>                                                | <b>TCGA's abbreviation</b> | <b>Samples</b> |
|------------------------------------------------------------------|----------------------------|----------------|
| Breast invasive carcinoma                                        | BRCA                       | 1,037          |
| Bladder urothelial carcinoma                                     | BLCA                       | 395            |
| Cervical squamous cell carcinoma and endocervical adenocarcinoma | CESC                       | 287            |
| Colon adenocarcinoma                                             | COAD                       | 350            |
| Glioblastoma multiforme                                          | GBM                        | 153            |
| Head and neck squamous cell carcinoma                            | HNSC                       | 495            |
| Kidney renal clear cell carcinoma                                | KIRC                       | 519            |
| Kidney renal papillary cell carcinoma                            | KIRP                       | 269            |
| Lower grade glioma                                               | LGG                        | 655            |
| Liver hepatocellular carcinoma                                   | LIHC                       | 338            |
| Lung adenocarcinoma                                              | LUAD                       | 476            |
| Lung squamous cell carcinoma                                     | LUSC                       | 475            |
| Ovarian serous cystadenocarcinoma                                | OV                         | 372            |
| Prostate adenocarcinoma                                          | PRAD                       | 496            |
| Rectum adenocarcinoma                                            | READ                       | 125            |
| Skin cutaneous melanoma                                          | SKCM                       | 85             |
| Stomach adenocarcinoma                                           | STAD                       | 338            |
| Thyroid carcinoma                                                | THCA                       | 498            |
| Uterine corpus endometrioid carcinoma                            | UCEC                       | 539            |

Supplementary Table 22: Differentially expressed lncRNAs in GSCs significantly associated with prognosis in GBM.

PART A. Univariate analysis of lncRNAs

| lncRNA        | Mesenchymal-GSCs | Cox regression |                |            | log-rank.pvalue | other.tumors            |
|---------------|------------------|----------------|----------------|------------|-----------------|-------------------------|
|               |                  | beta.coef      | Wald.statistic | Cox.pvalue |                 |                         |
| CTD-2589M5.5  | up               | 2.7389         | 3.7104         | 0.0002     | 0.0001          | KIRC                    |
| SOX21-AS1     | down             | -0.1676        | -3.2633        | 0.0011     | 0.0047          | CESC                    |
| MYOSLID       | up               | 0.3918         | 3.1528         | 0.0016     | 0.0110          | HNSC,KIRC,KIRP,LGG,UCEC |
| CRNDE         | up               | 0.0863         | 3.5171         | 0.0004     | 0.0120          | LGG,LUAD,THCA           |
| AC005264.2    | up               | 4.9631         | 3.5559         | 0.0004     | 0.0158          | HNSC                    |
| RP11-575F12.1 | up               | 3.9087         | 2.4723         | 0.0134     | 0.0334          | ----                    |

high expression associated with poor prognosis

high expression associated with better prognosis

PART B. Multivariate analysis of lncRNAs and clinical parameters

| variable               | CTD-2589M5.5 |                |               | SOX21-AS1 |                |               | MYOSLID   |                |               |
|------------------------|--------------|----------------|---------------|-----------|----------------|---------------|-----------|----------------|---------------|
|                        | beta.coef    | Wald.statistic | Cox.pvalue    | beta.coef | Wald.statistic | Cox.pvalue    | beta.coef | Wald.statistic | Cox.pvalue    |
| lncRNA                 | 2.9512       | 3.1500         | <b>0.0016</b> | -0.1790   | -2.6102        | <b>0.0090</b> | 0.8050    | 2.1389         | <b>0.0324</b> |
| age at diagnosis       | 0.5335       | 1.7187         | 0.0857        | 0.5917    | 1.8940         | 0.0582        | 0.6910    | 2.1127         | <b>0.0346</b> |
| gender                 | -0.3129      | -1.1116        | 0.2663        | 0.1605    | 0.5079         | 0.6115        | -0.2283   | -0.8285        | 0.4074        |
| CIMP status            | 0.2230       | 0.2378         | 0.8120        | 0.3155    | 0.3541         | 0.7233        | 0.4810    | 0.5311         | 0.5954        |
| IDH1 mutation          | 1.4575       | 1.4885         | 0.1366        | 1.5631    | 1.6686         | 0.0952        | 1.4187    | 1.4822         | 0.1383        |
| MGMT methylation       | 0.2439       | 0.8588         | 0.3904        | 0.0376    | 0.1227         | 0.9023        | 0.3214    | 1.1492         | 0.2505        |
| chr 19/20 co-gain      | 1.2870       | 2.8095         | <b>0.0050</b> | 1.1573    | 2.5024         | <b>0.0123</b> | 1.2405    | 2.7213         | <b>0.0065</b> |
| chr 7 gain/chr 10 loss | 0.0805       | 0.2733         | 0.7846        | 0.1482    | 0.5271         | 0.5981        | 0.2086    | 0.7326         | 0.4638        |

\*significant variables (p<0.05)

| variable               | CRNDE     |                |               | AC005264.2 |                |               | RP11-575F12.1 |                |               |
|------------------------|-----------|----------------|---------------|------------|----------------|---------------|---------------|----------------|---------------|
|                        | beta.coef | Wald.statistic | Cox.pvalue    | beta.coef  | Wald.statistic | Cox.pvalue    | beta.coef     | Wald.statistic | Cox.pvalue    |
| lncRNA                 | 0.0708    | 2.2929         | <b>0.0219</b> | 6.2901     | 4.0482         | <b>0.0001</b> | 5.2020        | 1.9933         | <b>0.0462</b> |
| age at diagnosis       | 0.5759    | 1.8630         | 0.0625        | 0.5009     | 1.6054         | 0.1084        | 0.5246        | 1.6998         | 0.0892        |
| gender                 | -0.3174   | -1.1087        | 0.2675        | -0.0666    | -0.2353        | 0.8140        | -0.3786       | -1.3188        | 0.1872        |
| CIMP status            | 0.7011    | 0.7955         | 0.4263        | 0.4377     | 0.4857         | 0.6272        | 0.5731        | 0.6738         | 0.5004        |
| IDH1 mutation          | 1.5042    | 1.5970         | 0.1103        | 1.4554     | 1.5310         | 0.1258        | 1.6372        | 1.7991         | 0.0720        |
| MGMT methylation       | 0.4147    | 1.4743         | 0.1404        | 0.4312     | 1.5554         | 0.1199        | 0.5118        | 1.8300         | 0.0672        |
| chr 19/20 co-gain      | 1.3610    | 3.0141         | <b>0.0026</b> | 1.2733     | 2.7621         | <b>0.0057</b> | 1.1554        | 2.5138         | <b>0.0119</b> |
| chr 7 gain/chr 10 loss | 0.4099    | 1.4812         | 0.1386        | 0.1894     | 0.6771         | 0.4984        | 0.4450        | 1.5918         | 0.1114        |

\*significant variables (p<0.05)



Supplementary Table 23: Differentially expressed lncRNAs in GSCs significantly associated with prognosis in mesenchymal and proneural GBM.

PART A. Univariate analysis of lncRNAs in mesenchymal GBM

| lncRNA       | Mesenchymal-GSCs | Cox regression |                |            | log-rank.pvalue | other.tumors |
|--------------|------------------|----------------|----------------|------------|-----------------|--------------|
|              |                  | beta.coef      | Wald.statistic | Cox.pvalue |                 |              |
| CTB-60B18.12 | up               | 20.5377        | 3.0619         | 0.0022     | 0.0027          | ----         |
| AC005264.2   | up               | 9.1094         | 3.3256         | 0.0009     | 0.0097          | HNSC         |
| CTD-2589M5.5 | up               | 2.9758         | 2.8526         | 0.0043     | 0.0477          | KIRC         |

high expression associated with poor prognosis

high expression associated with better prognosis

PART B. Univariate analysis of lncRNAs in proneural GBM

| lncRNA         | Mesenchymal-GSCs | Cox regression |                |            | log-rank.pvalue | other.tumors       |
|----------------|------------------|----------------|----------------|------------|-----------------|--------------------|
|                |                  | beta.coef      | Wald.statistic | Cox.pvalue |                 |                    |
| RP4-806M20.4   | up               | 3.7744         | 3.5038         | 0.0005     | 0.0014          | BLCA,KIRC          |
| RP11-676J12.7  | up               | 8.0575         | 2.2958         | 0.0217     | 0.0029          | STAD               |
| CRNDE          | up               | 0.1092         | 2.7879         | 0.0053     | 0.0181          | LGG,LUAD,THCA      |
| CTC-459F4.9    | up               | 0.6691         | 2.0621         | 0.0392     | 0.0204          | KIRC,LUSC          |
| RP11-1334A24.5 | up               | 2.2393         | 2.1045         | 0.0353     | 0.043           | BRCA,KIRC,KIRP,LGG |

PART C. Multivariate analysis of lncRNAs and clinical parameters in mesenchymal GBM

| variable               | CTB-60B18.12 |                |               | AC005264.2 |                |               | CTD-2589M5.5 |                |               |
|------------------------|--------------|----------------|---------------|------------|----------------|---------------|--------------|----------------|---------------|
|                        | beta.coef    | Wald.statistic | Cox.pvalue    | beta.coef  | Wald.statistic | Cox.pvalue    | beta.coef    | Wald.statistic | Cox.pvalue    |
| lncRNA                 | 33.0376      | 2.8358         | <b>0.0046</b> | 7.8433     | 2.3209         | <b>0.0203</b> | 2.7948       | 1.9768         | <b>0.0481</b> |
| age at diagnosis       | 2.1069       | 2.4202         | <b>0.0155</b> | 1.2896     | 1.7938         | 0.0728        | 1.1447       | 1.5948         | 0.1108        |
| gender                 | -0.0734      | -0.0961        | 0.9235        | -0.1417    | -0.1815        | 0.8560        | -0.4173      | -0.5389        | 0.5899        |
| CIMP status            | ----         | ----           | ----          | ----       | ----           | ----          | ----         | ----           | ----          |
| IDH1 mutation          | ----         | ----           | ----          | ----       | ----           | ----          | ----         | ----           | ----          |
| MGMT methylation       | -0.2769      | -0.3597        | 0.7191        | 0.0773     | 0.0979         | 0.9221        | 0.4200       | 0.5347         | 0.5929        |
| chr 19/20 co-gain      | 1.4125       | 1.3232         | 0.1858        | -0.4264    | -0.4767        | 0.6336        | -0.3758      | -0.4180        | 0.6759        |
| chr 7 gain/chr 10 loss | 1.5644       | 2.5044         | <b>0.0123</b> | 1.1077     | 1.6839         | 0.0922        | 1.0507       | 1.5672         | 0.1171        |

\*significant variables (p<0.05)

PART D. Multivariate analysis of lncRNAs and clinical parameters in proneural GBM

| variable               | RP4-806M20.4 |                |               | RP11-676J12.7 |                |                   | CRNDE     |                |               |
|------------------------|--------------|----------------|---------------|---------------|----------------|-------------------|-----------|----------------|---------------|
|                        | beta.coef    | Wald.statistic | Cox.pvalue    | beta.coef     | Wald.statistic | Cox.pvalue        | beta.coef | Wald.statistic | Cox.pvalue    |
| lncRNA                 | 5.4902       | 2.3728         | <b>0.0177</b> | 43.5598       | 6.7626         | <b>&lt;0.0001</b> | 0.1043    | 2.7750         | <b>0.0055</b> |
| age at diagnosis       | -0.1168      | -0.0705        | 0.9438        | 1.4617        | 1.3044         | 0.1921            | 0.0185    | 0.0170         | 0.9864        |
| gender                 | 1.8457       | 1.3081         | 0.1909        | 5.8983        | 5.0449         | <b>&lt;0.0001</b> | 2.6368    | 2.7610         | <b>0.0058</b> |
| CIMP status            | ----         | ----           | ----          | ----          | ----           | ----              | ----      | ----           | ----          |
| IDH1 mutation          | 23.4572      | 0.0015         | 0.9988        | 24.7285       | 0.0017         | 0.9987            | 19.6754   | 0.0050         | 0.9960        |
| MGMT methylation       | -2.3104      | -2.0284        | <b>0.0425</b> | -3.7578       | -4.8466        | <b>&lt;0.0001</b> | -2.2035   | -3.1479        | <b>0.0016</b> |
| chr 19/20 co-gain      | 21.5606      | 0.0008         | 0.9994        | 21.3173       | 0.0009         | 0.9993            | 18.7554   | 0.0027         | 0.9978        |
| chr 7 gain/chr 10 loss | -4.2776      | -2.3606        | <b>0.0182</b> | -5.1058       | -4.4856        | <b>&lt;0.0001</b> | -3.1269   | -2.6810        | <b>0.0073</b> |

\*significant variables (p<0.05)

| variable         | CTC-459F4.9 |                |               | RP11-1334A24.5 |                |               |
|------------------|-------------|----------------|---------------|----------------|----------------|---------------|
|                  | beta.coef   | Wald.statistic | Cox.pvalue    | beta.coef      | Wald.statistic | Cox.pvalue    |
| lncRNA           | 1.4546      | 2.0460         | <b>0.0408</b> | 8.4904         | 2.0374         | <b>0.0416</b> |
| age at diagnosis | -0.1616     | -0.1363        | 0.8916        | 0.3081         | 0.2469         | 0.8050        |
| gender           | 1.9280      | 1.7567         | 0.0790        | 3.9690         | 2.5544         | <b>0.0106</b> |
| CIMP status      | ----        | ----           | ----          | ----           | ----           | ----          |
| IDH1 mutation    | 20.9784     | 0.0013         | 0.9990        | 19.2700        | 0.0012         | 0.9990        |

|                        |         |         |               |         |         |               |
|------------------------|---------|---------|---------------|---------|---------|---------------|
| MGMT methylation       | -2.0482 | -2.0364 | <b>0.0417</b> | 1.0608  | 0.7475  | 0.4548        |
| chr 19/20 co-gain      | 20.8821 | 0.0007  | 0.9994        | 18.6720 | 0.0006  | 0.9995        |
| chr 7 gain/chr 10 loss | -3.4659 | -2.7186 | <b>0.0066</b> | -3.9128 | -2.5797 | <b>0.0099</b> |

\*significant variables (p<0.05)

**Supplementary Table 24:** lncRNA-associated splicing events enriched in mesenchymal (MES) and proneural (PN) GSCs samples.

**ASS (alternative 5' or 3' splice site):** genomic coordinates of long and short exons (columns g.coord\_1 and g.coord\_2)  
**MXE (mutually exclusive exon):** genomic coordinates of first and SEcond exons (columns g.coord\_1 and g.coord\_2)  
**RI (retained introns):** genomic coordinates of retained intron (column g.coord\_1)  
**ES (exon skipping):** genomic coordinates of skipped exon (column g.coord\_1)

| MES        |                        |        |                          |                          |                      |          |  | PN         |                |        |                           |                          |                      |                |  |
|------------|------------------------|--------|--------------------------|--------------------------|----------------------|----------|--|------------|----------------|--------|---------------------------|--------------------------|----------------------|----------------|--|
| event.type | lncRNA                 | strand | g.coord_1                | g.coord_2                | inc.level.difference | FDR      |  | event.type | lncRNA         | strand | g.coord_1                 | g.coord_2                | inc.level.difference | FDR            |  |
| MXE        | GAS5                   | -      | chr1:173865509-173865547 | chr1:173865856-173866206 | 0.274                | 0        |  | MXE        | GAS5           | -      | chr1:173865470-173865547  | chr1:173865856-173865894 | -0.266               | 0              |  |
| MXE        | GAS5                   | -      | chr1:173865856-173865894 | chr1:173866527-173866796 | 0.254                | 0        |  | MXE        | GAS5           | -      | chr1:173864674-173864704  | chr1:173865228-173865282 | -0.224               | 0              |  |
| RI         | GAS5                   | -      | chr1:173865228-173865547 | NA                       | 0.436                | 0        |  | ES         | ZFAS1          | +      | chr20:49280484-49280570   | NA                       | -0.112               | 5.59E-14       |  |
| RI         | GAS5                   | -      | chr1:173864256-173865282 | NA                       | 0.15                 | 0        |  | ES         | PSMA3-AS1      | -      | chr14:58293065-58293138   | NA                       | -0.417               | 1.58E-13       |  |
| ASS        | GAS5                   | -      | chr1:173865470-173865547 | chr1:173865509-173865547 | 0.477                | 0        |  | ES         | TMEM161B-AS1   | +      | chr5:88287435-88287622    | NA                       | -0.534               | 8.81E-13       |  |
| MXE        | GAS5                   | -      | chr1:173865856-173865894 | chr1:173866176-173866206 | 0.232                | 0        |  | MXE        | GAS5           | -      | chr1:173864483-173864506  | chr1:173865228-173865282 | -0.124               | 6.96E-12       |  |
| MXE        | GAS5                   | -      | chr1:173865509-173865547 | chr1:173866176-173866206 | 0.233                | 0        |  | ES         | MAPKAPK5-AS1   | -      | chr12:111840332-111840477 | NA                       | -0.213               | 3.75E-11       |  |
| ES         | SNHG6                  | -      | chr8:66922613-66922725   | NA                       | 0.151                | 0        |  | ES         | SNHG5          | -      | chr6:85677790-85677875    | NA                       | -0.106               | 4.04E-11       |  |
| RI         | ZNF582-AS1             | +      | chr19:56398276-56399168  | NA                       | 0.809                | 0        |  | ES         | AC074286.1     | -      | chr2:177332141-177332251  | NA                       | -0.616               | 6.59E-11       |  |
| ES         | USP3-AS1               | -      | chr15:63593748-63593877  | NA                       | 0.925                | 4.00E-12 |  | ES         | ZNF667-AS1     | +      | chr19:56491576-56491766   | NA                       | -0.819               | 1.32E-10       |  |
| ES         | PCBP1-AS1              | -      | chr2:7005370-7005381     | NA                       | 0.84                 | 2.34E-11 |  | MXE        | RASSF8-AS1     | -      | chr12:25952757-25953076   | chr12:25956226-25956347  | -0.53                | 9.32E-10       |  |
| MXE        | GAS5                   | -      | chr1:173865509-173865547 | chr1:173865856-173865894 | 0.154                | 2.88E-11 |  | MXE        | GAS5           | -      | chr1:173865470-173865547  | chr1:173866176-173866206 | -0.232               | 1.87E-09       |  |
| MXE        | GAS5                   | -      | chr1:173864674-173864704 | chr1:173865228-173865282 | 0.206                | 5.01E-11 |  | ES         | TMEM161B-AS1   | +      | chr5:88287435-88287622    | NA                       | -0.436               | 4.27E-09       |  |
| ES         | RP4-798P15.3           | -      | chr1:177984205-177984418 | NA                       | 0.86                 | 9.70E-11 |  | ES         | SNHG5          | -      | chr6:85677794-85677868    | NA                       | -0.124               | 3.33E-08       |  |
| ES         | RASSF8-AS1             | -      | chr12:25956226-25956347  | NA                       | 0.633                | 2.67E-10 |  | ES         | SNHG5          | -      | chr6:85677794-85677899    | NA                       | -0.128               | 7.18E-08       |  |
| RI         | GAS5                   | -      | chr1:173864483-173864704 | NA                       | 0.206                | 4.03E-10 |  | RI         | CTC-308K20.1   | -      | chr5:172957153-172958257  | NA                       | -0.484               | 1.27E-07       |  |
| ES         | THUMP3-AS1             | -      | chr3:9395505-9395579     | NA                       | 0.324                | 4.80E-10 |  | ES         | HCG18          | -      | chr6:30314268-30314482    | NA                       | -0.478               | 1.30E-07       |  |
| ES         | SNHG17                 | -      | chr20:38422091-38422241  | chr20:38425934-38426052  | 0.256                | 5.21E-09 |  | ES         | TMEM161B-AS1   | +      | chr5:88283009-88283086    | NA                       | -0.54                | 1.95E-07       |  |
| MXE        | SNHG17                 | -      | chr20:38422091-38422241  | chr20:38425934-38426052  | 0.256                | 5.21E-09 |  | ES         | ARMCX5-GPRASP2 | +      | chrX:102601879-102601977  | NA                       | -0.266               | 1.98E-07       |  |
| RI         | GAS5                   | -      | chr1:173864256-173864506 | NA                       | 0.171                | 1.09E-08 |  | ES         | RGM8-AS1       | -      | chr5:98771655-98771766    | NA                       | -0.667               | 2.10E-07       |  |
| MXE        | RP11-421L21.3          | +      | chr1:10107362-10107571   | chr1:101077362-101077508 | 0.439                | 3.74E-08 |  | ES         | SNHG14         | -      | chr15:25053265-25053363   | NA                       | -0.65                | 2.78E-07       |  |
| MXE        | GAS5                   | -      | chr1:173865856-173865894 | chr1:173866760-173866796 | 0.229                | 1.36E-07 |  | MXE        | TPT1-AS1       | -      | chr13:45378529-45378671   | chr13:45383090-45383235  | -0.625               | 6.05E-07       |  |
| MXE        | PCBP1-AS1              | -      | chr2:7005370-70053792    | chr2:7005513-70055910    | 0.505                | 1.79E-07 |  | ES         | DLEU2          | -      | chr13:50049583-50049662   | NA                       | -0.345               | 6.76E-07       |  |
| ASS        | SNHG5                  | -      | chr6:85677794-85678032   | chr6:85677953-85678032   | 0.139                | 3.85E-07 |  | ES         | BDNF-AS        | +      | chr11:27658240-27658462   | NA                       | -0.274               | 1.00E-06       |  |
| ES         | PCBP1-AS1              | -      | chr2:7005370-7005392     | NA                       | 0.227                | 4.19E-07 |  | ES         | RP11-421L21.3  | +      | chr1:101075394-101075716  | NA                       | -0.362               | 1.04E-06       |  |
| MXE        | PCBP1-AS1              | -      | chr2:7005370-7005392     | chr2:70055655-70055910   | 0.392                | 5.67E-07 |  | RI         | A1BG-AS1       | +      | chr19:58353713-58355183   | NA                       | -0.563               | 1.09E-06       |  |
| RI         | TTC28-AS1              | +      | chr22:27997410-27998838  | NA                       | 0.378                | 9.64E-07 |  | ES         | DLEU2          | -      | chr13:50044650-50044768   | NA                       | -0.404               | 1.13E-06       |  |
| MXE        | PCBP1-AS1              | -      | chr2:7005370-7005392     | chr2:7005513-70055910    | 0.382                | 1.18E-06 |  | ES         | LINC00969      | +      | chr3:195663623-195663832  | NA                       | -0.32                | 2.17E-06       |  |
| ES         | PCBP1-AS1              | -      | chr2:7005370-7005392     | NA                       | 0.359                | 2.03E-06 |  | ES         | SLCO4A1-AS1    | -      | chr20:62664293-62665497   | NA                       | -0.273               | 2.23E-06       |  |
| MXE        | PCBP1-AS1              | -      | chr2:7005370-7005392     | chr2:70059642-70059680   | 0.407                | 4.02E-06 |  | ES         | RP11-421L21.3  | +      | chr1:101080388-101080613  | NA                       | -0.634               | 2.30E-06       |  |
| MXE        | PCBP1-AS1              | -      | chr2:7005370-7005392     | chr2:70083537-70083687   | 0.148                | 5.92E-06 |  | ES         | RP11-9G1.3     | -      | chr4:133140585-133140659  | NA                       | -0.468               | 2.41E-06       |  |
| MXE        | PCBP1-AS1              | -      | chr2:7005370-7005392     | chr2:70083506-70083687   | 0.166                | 6.87E-06 |  | ES         | PCBP1-AS1      | -      | chr2:70055713-70055910    | NA                       | -0.436               | 2.42E-06       |  |
| ES         | PSMA3-AS1              | -      | chr14:58288717-58288813  | NA                       | 0.432                | 7.31E-06 |  | ES         | TMEM161B-AS1   | +      | chr5:88287540-88285851    | NA                       | -0.317               | 2.86E-06       |  |
| ES         | GUSBP11                | -      | chr22:23700725-23700845  | NA                       | 0.608                | 8.54E-06 |  | ES         | AC007566.10    | +      | chr7:92462957-92463026    | NA                       | -0.228               | 3.06E-06       |  |
| ES         | PCBP1-AS1              | -      | chr2:7005370-7005392     | NA                       | 0.315                | 1.22E-05 |  | MXE        | TPT1-AS1       | +      | chr13:45379194-45379335   | chr13:45383090-45383235  | -0.547               | 3.37E-06       |  |
| MXE        | NUTM2A-AS1             | -      | chr10:87246114-87246212  | chr10:87288441-87288495  | 0.172                | 1.51E-05 |  | ES         | DLGAP1-AS1     | +      | chr8:35965758-3596675     | NA                       | -0.304               | 4.07E-06       |  |
| MXE        | GAS5                   | -      | chr1:173865228-173865282 | chr1:173865470-173865547 | 0.121                | 1.59E-05 |  | ES         | CDC18-AS1      | -      | chr1:93318167-93318228    | NA                       | -0.794               | 6.70E-06       |  |
| ASS        | TPT1-AS1               | +      | chr13:45390713-45390902  | chr13:45390757-45390902  | 0.12                 | 1.61E-05 |  | MXE        | SLCO4A1-AS1    | -      | chr20:62664293-62665497   | chr20:62665859-62666010  | -0.113               | 7.86E-06       |  |
| ES         | RP11-452F19.3          | +      | chr1:222823855-222823945 | NA                       | 0.305                | 2.24E-05 |  | ES         | PVT1           | +      | chr8:127983903-127984204  | NA                       | -0.173               | 1.02E-05       |  |
| ES         | CTD-2341M24.1          | +      | chr14:86128664-86128773  | NA                       | 0.612                | 5.70E-05 |  | ES         | PSMA3-AS1      | -      | chr14:58285905-58285756   | NA                       | -0.308               | 1.18E-05       |  |
| MXE        | GAS5                   | -      | chr1:173865509-173865547 | chr1:173866527-173866567 | 0.214                | 6.74E-05 |  | ASS        | LRRC75A-AS1    | +      | chr17:16463163-16463317   | chr17:16463166-16463317  | -0.451               | 1.54E-05       |  |
| MXE        | LINC01184              | -      | chr5:127956803-127956921 | chr5:128061143-128061244 | 0.313                | 8.49E-05 |  | ASS        | RISN614        | +      | chr15:25087466-25089866   | NA                       | -0.204               | 1.55E-05       |  |
| ASS        | TPT1-AS1               | +      | chr13:45377060-45377215  | chr13:45377139-45377215  | 0.22                 | 1.98E-04 |  | ES         | TPT1-AS1       | +      | chr13:45390757-45390902   | NA                       | -0.148               | 1.99E-05       |  |
| MXE        | GAS5                   | -      | chr1:173865856-173865894 | chr1:173866527-173866567 | 0.25                 | 3.77E-04 |  | ES         | PVT1           | +      | chr8:128099369-128099573  | NA                       | -0.182               | 2.16E-05       |  |
| ES         | GAS5                   | -      | chr1:173864674-173864704 | NA                       | 0.223                | 5.29E-04 |  | MXE        | GAS5           | -      | chr1:173865228-173865547  | chr1:173866176-173866206 | -0.198               | 2.31E-05       |  |
| ES         | RP11-319G6.1           | +      | chr3:139419556-139419604 | NA                       | 0.16                 | 5.72E-04 |  | ES         | LINC00910      | -      | chr17:43387935-43388057   | NA                       | -0.294               | 2.51E-05       |  |
| MXE        | PKD1P6-NPIP1           | +      | chr16:15118925-15119505  | chr16:15125690-15125807  | 0.146                | 7.72E-04 |  | ES         | TPT1-AS1       | +      | chr13:45390713-45390902   | NA                       | -0.109               | 2.67E-05       |  |
| MXE        | PSMA3-AS1              | -      | chr14:58273978-58274010  | chr14:58285590-58285756  | 0.377                | 1.14E-03 |  | MXE        | TPT1-AS1       | +      | chr13:45379194-45379335   | chr13:45383090-45383235  | -0.37                | 3.21E-05       |  |
| ES         | WAC-AS1                | -      | chr20:28525947-28526008  | NA                       | 0.149                | 1.17E-03 |  | MXE        | LINC00630      | +      | chrX:102816991-102817082  | chrX:102825992-102826169 | -0.477               | 4.09E-05       |  |
| ES         | TTC28-AS1              | +      | chr22:27989881-27990026  | NA                       | 0.514                | 1.92E-03 |  | ES         | PSMA3-AS1      | -      | chr14:58293765-58293811   | NA                       | -0.201               | 4.24E-05       |  |
| ASS        | PCBP1-AS1              | -      | chr2:70085815-70086273   | chr2:70086123-70086273   | 0.138                | 1.97E-03 |  | ES         | RP11-4210.1    | +      | chr16:48671860-48672033   | NA                       | -0.342               | 6.74E-05       |  |
| ES         | FOXD3-AS1              | -      | chr1:63321664-63322080   | NA                       | 0.279                | 2.72E-03 |  | ES         | PRR34-AS1      | -      | chr22:46055598-46055733   | NA                       | -0.455               | 7.54E-05       |  |
| MXE        | STAG3L5P-PVRIG2P-PILRB | +      | chr7:100338772-100338889 | chr7:100345864-100345968 | 0.111                | 2.96E-03 |  | ES         | PSMA3-AS1      | -      | chr14:58273978-58274135   | NA                       | -0.237               | 7.74E-05       |  |
| ES         | PCBP1-AS1              | -      | chr2:70059642-70059680   | NA                       | 0.334                | 3.39E-03 |  | MXE        | GAS5           | -      | chr1:173865470-173865547  | chr1:173866527-173866567 | -0.194               | 8.27E-05       |  |
| ES         | RP11-295P9.3           | +      | chr10:13654088-13654258  | NA                       | 0.33                 | 3.52E-03 |  | MXE        | TPT1-AS1       | +      | chr13:45379925-45380001   | chr13:45383090-45383235  | -0.293               | 8.84E-05       |  |
| ASS        | PCBP1-AS1              | -      | chr2:70080654-70080629   | chr2:70086123-70086269   | 0.295                | 3.79E-03 |  | MXE        | TPT1-AS1       | +      | chr13:45379925-45380001   | chr13:45383090-45383235  | -0.308               | 9.27E-05       |  |
| ES         | PCBP1-AS1              | -      | chr2:7005370-7005392     | NA                       | 0.657                | 3.87E-03 |  | MXE        | PVT1           | +      | chr8:127939507-127939676  | chr8:127983903-127984204 | -0.137               | 0.000100701608 |  |
| ES         | PVT1                   | +      | chr8:128070159-128070272 | NA                       | 0.138                | 3.88E-03 |  | MXE        | GUSBP11        | -      | chr22:23700725-23700845   | NA                       | -0.284               | 0.000126545078 |  |
| ES         | TTC28-AS1              | +      | chr22:27935150-27935230  | NA                       | 0.145                | 4.42E-03 |  | ES         | RNASEH1-AS1    | +      | chr2:3559447-3559729      | NA                       | -0.187               | 0.000171719075 |  |
| ES         | DHRS4-AS1              | -      | chr14:23953773-23954033  | NA                       | 0.213                | 4.87E-03 |  | RI         | RP11-295P9.3   | +      | chr10:13654352-13654482   | NA                       | -0.475               | 0.000173568272 |  |
| RI         | SNHG17                 | -      | chr20:38421005-38422241  | NA                       | 0.299                | 4.90E-03 |  | MXE        | TPT1-AS1       | +      | chr13:45379194-45380001   | chr13:45383090-45383235  | -0.377               | 0.000188143965 |  |
| ASS        | PSMA3-AS1              | -      | chr14:58273978-58274135  | chr14:58273978-58274010  | 0.23                 | 5.08E-03 |  |            |                |        |                           |                          |                      |                |  |

|     |                |   |                          |                          |        |                |
|-----|----------------|---|--------------------------|--------------------------|--------|----------------|
| ES  | LRR75A-AS1     | + | chr17:16460892-16461245  | NA                       | 0.218  | 0.04305333938  |
| MXE | CCDC18-AS1     | - | chr1:93315148-93315269   | chr1:93318167-93318228   | 0.386  | 0.04922057688  |
| ASS | PCBP1-AS1      | - | chr2:70083506-70083687   | chr2:70083537-70083687   | -0.299 | 0.004120571796 |
| ES  | TPT1-AS1       | + | chr13:45360140-45360239  | NA                       | -0.619 | 0.004168487247 |
| ES  | NR2F1-AS1      | - | chr5:93438702-93438741   | NA                       | -0.288 | 0.004687272022 |
| ES  | UBL7-AS1       | + | chr15:74466035-74466130  | NA                       | -0.286 | 0.00472504306  |
| ASS | KB-1572G7.2    | - | chr22:23686830-23686995  | chr22:23686837-23686995  | -0.224 | 0.005345988046 |
| ES  | ALOX12-AS1     | - | chr17:70100558-7010137   | NA                       | -0.167 | 0.005410559041 |
| MXE | PSMA3-AS1      | - | chr14:58285590-58285756  | chr14:58291634-58291707  | -0.248 | 0.005483540331 |
| ES  | PSMA3-AS1      | - | chr14:58293313-58293544  | NA                       | -0.102 | 0.005554562012 |
| MXE | TTC28-AS1      | + | chr22:27935150-27935230  | chr22:27993123-27993535  | -0.166 | 0.007663048107 |
| ES  | SNHG14         | + | chr15:24998969-24999078  | NA                       | -0.19  | 0.007705740173 |
| MXE | LINC00174      | - | chr7:66455658-66455853   | chr7:66467681-66467719   | -0.442 | 0.008104896287 |
| ES  | KB-1572G7.2    | - | chr22:23686830-23686995  | NA                       | -0.362 | 0.008304198588 |
| MXE | GAS5           | - | chr1:173866760-173866796 | chr1:173866990-173867043 | -0.166 | 0.008854126289 |
| ES  | ZBED3-AS1      | + | chr5:77100235-77100391   | NA                       | -0.276 | 0.009747054499 |
| MXE | PCBP1-AS1      | - | chr2:70055655-70055910   | chr2:70059642-70059680   | -0.27  | 0.01020578741  |
| ES  | LINC01001      | - | chr11:134563-134796      | NA                       | -0.533 | 0.01082847443  |
| ES  | RP11-216L13.19 | + | chr9:136809254-136809429 | NA                       | -0.207 | 0.01082847443  |
| ES  | SNHG3          | + | chr1:28508127-28508160   | NA                       | -0.173 | 0.0111445589   |
| ES  | OSER1-AS1      | + | chr20:44214887-44215003  | NA                       | -0.236 | 0.01202849288  |
| ES  | CTD-2651B20.3  | - | chr15:45264626-45264809  | NA                       | -0.287 | 0.01243842924  |
| MXE | THAP9-AS1      | - | chr4:82895691-82895774   | chr4:82897988-82898062   | -0.118 | 0.01323461605  |
| MXE | PCBP1-AS1      | - | chr2:70055713-70055910   | chr2:70059642-70059680   | -0.246 | 0.01388670621  |
| MXE | PCBP1-AS1      | - | chr2:70055713-70055910   | chr2:70059642-70059680   | -0.246 | 0.01388670621  |
| ES  | MIR22HG        | - | chr17:1714370-1714453    | NA                       | -0.418 | 0.01461642436  |
| ES  | TMEM44-AS1     | + | chr3:194589473-194589626 | NA                       | -0.4   | 0.01519053624  |
| ES  | TMEM161B-AS1   | + | chr5:88283009-88283086   | NA                       | -0.3   | 0.01655644229  |
| ES  | MIATNB         | + | chr22:26718139-26718231  | NA                       | -0.307 | 0.01784243899  |
| ES  | RBM26-AS1      | + | chr13:79417834-79417916  | NA                       | -0.207 | 0.0179359004   |
| ES  | HCG18          | - | chr6:30314268-30314482   | NA                       | -0.426 | 0.01832264645  |
| ES  | RP11-250B2.3   | + | chr6:80454109-80454227   | NA                       | -0.281 | 0.01900862158  |
| ES  | TUG1           | + | chr22:30972047-30972172  | NA                       | -0.204 | 0.02023209143  |
| ES  | FAM66C         | + | chr12:8195276-8195412    | NA                       | -0.396 | 0.02043424899  |
| ES  | LINC00963      | + | chr9:129502396-129503139 | NA                       | -0.244 | 0.02048193694  |
| ES  | CTD-2378E12.1  | - | chr15:50890855-50891077  | NA                       | -0.655 | 0.02204339488  |
| ES  | LINC01128      | + | chr1:850177-850351       | NA                       | -0.51  | 0.02372588051  |
| ES  | RP11-156P1.3   | - | chr17:47033277-47033381  | NA                       | -0.171 | 0.02472987573  |
| ES  | LINC00969      | + | chr3:195688338-195689438 | NA                       | -0.151 | 0.02605534879  |
| ES  | TMEM161B-AS1   | + | chr5:88285740-88285851   | NA                       | -0.2   | 0.02616662861  |
| ES  | CCDC18-AS1     | - | chr1:93318167-93318228   | NA                       | -0.312 | 0.02759347156  |
| ES  | AC108488.4     | - | chr2:3533107-3533190     | NA                       | -0.211 | 0.02988419007  |
| MXE | TPT1-AS1       | + | chr13:45379998-45380001  | chr13:45383090-45383235  | -0.116 | 0.03030437867  |
| ES  | RP11-274B21.14 | + | chr7:128579998-128580094 | NA                       | -0.156 | 0.0314556154   |
| MXE | PCBP1-AS1      | - | chr2:70055713-70055910   | chr2:70059642-70059680   | -0.431 | 0.03469929876  |
| ES  | PSMG3-AS1      | + | chr7:1579286-1579404     | NA                       | -0.294 | 0.03625932837  |
| ES  | LINC00963      | + | chr9:129502396-129503139 | NA                       | -0.268 | 0.03797039936  |
| ES  | RASSF8-AS1     | - | chr12:25947518-25947622  | NA                       | -0.397 | 0.0415224856   |
| MXE | RP11-421L21.3  | + | chr1:101077362-101077508 | chr1:101083460-101083574 | -0.235 | 0.04252502176  |
| ES  | AC091729.9     | + | chr7:1162351-1162543     | NA                       | -0.173 | 0.04292658489  |
| MXE | LINC01778      | + | chr1:30826554-30826652   | chr1:30829747-30829882   | -0.203 | 0.04357236015  |
| ES  | LINC00630      | + | chrX:102839800-102839863 | NA                       | -0.285 | 0.04393571592  |
| ES  | CD27-AS1       | - | chr12:6450473-6450708    | NA                       | -0.232 | 0.0496313164   |

**Supplementary Table 25:** Differentially spliced and expressed lncRNAs in mesenchymal (MES) and proneural (PN) GSCs samples.

**ASS (alternative 5' or 3' splice site):** genomic coordinates of long and short exons (columns g.coord\_1 and g.coord\_2)

**MXE (mutually exclusive exon):** genomic coordinates of first and EScond exons (columns g.coord\_1 and g.coord\_2)

**RI (retained introns):** genomic coordinates of retained intron (column g.coord\_1)

**ES (exon skipping):** genomic coordinates of skipped exon (column g.coord\_1)

| lncRNA         | Differential expression |                | Differential splicing |        |                          |                          |                      |                |
|----------------|-------------------------|----------------|-----------------------|--------|--------------------------|--------------------------|----------------------|----------------|
|                | log2FoldChange          | FDR            | event.type            | strand | g.coord_1                | g.coord_2                | inc.level.difference | FDR            |
| AC005154.6     | -2.818045991            | 1.77E-11       | MXE                   | -      | chr7:30576563-30576710   | chr7:30584710-30584808   | 0.278                | 0.02127345004  |
| AC007566.10    | -1.014212726            | 0.04603914804  | ES                    | +      | chr7:92462957-92463026   | NA                       | 0.228                | 3.06E-06       |
| AC108488.4     | -1.73751869             | 0.01934800273  | ES                    | -      | chr2:3533107-3533190     | NA                       | 0.211                | 0.02986419007  |
| ARMCX5-GPRASP2 | -1.407923176            | 0.00109723521  | ES                    | +      | chrX:102601879-102601977 | NA                       | 0.266                | 1.98E-07       |
|                |                         |                | ES                    | +      | chrX:102601463-102601509 | NA                       | 0.358                | 0.000666033342 |
|                |                         |                | MXE                   | +      | chrX:102601463-102601509 | chrX:102601879-102601977 | -0.371               | 0.001699714909 |
|                |                         |                | MXE                   | +      | chrX:102601879-102601977 | chrX:102639399-102639533 | 0.154                | 0.02227107106  |
| BDNF-AS        | -2.440499658            | 0.000270164116 | ES                    | +      | chr11:27658240-27658462  | NA                       | 0.274                | 1.00E-06       |
|                |                         |                | ES                    | +      | chr11:27675576-27676140  | NA                       | 0.343                | 0.001406429329 |
|                |                         |                | ES                    | +      | chr11:27675296-27676140  | NA                       | 0.368                | 0.00177508727  |
| CD27-AS1       | -1.901100354            | 0.000615687138 | MXE                   | -      | chr12:6448639-6448737    | chr12:6450340-6450980    | -0.223               | 0.000313158994 |
|                |                         |                | ES                    | -      | chr12:6443545-6443717    | NA                       | 0.321                | 0.000758051464 |
|                |                         |                | ES                    | -      | chr12:6450340-6450980    | NA                       | -0.27                | 0.01669192307  |
|                |                         |                | ES                    | -      | chr12:6450869-6450980    | NA                       | -0.313               | 0.01675843214  |
|                |                         |                | ES                    | -      | chr12:6450892-6450980    | NA                       | -0.337               | 0.02475961249  |
|                |                         |                | ES                    | -      | chr12:6450473-6450708    | NA                       | 0.232                | 0.0496313164   |
| CTC-308K20.1   | 4.217809789             | 3.39E-10       | RI                    | -      | chr5:172957153-172958257 | NA                       | -0.484               | 1.27E-07       |
| CTD-2341M24.1  | 1.475568801             | 0.03769661099  | ES                    | +      | chr14:86128664-86128773  | NA                       | -0.612               | 5.70E-05       |
| FAM66C         | -1.945290987            | 3.52E-05       | ES                    | +      | chr12:8195276-8195412    | NA                       | 0.396                | 0.02043424899  |
|                |                         |                | ES                    | +      | chr12:8187731-8188225    | NA                       | -0.229               | 0.03557962837  |
| GAS5           | 1.714774757             | 0.001737349134 | A5SS                  | -      | chr1:173865470-173865547 | chr1:173865509-173865547 | 0.477                | 0              |
|                |                         |                | MXE                   | -      | chr1:173865509-173865547 | chr1:173866176-173866206 | 0.233                | 0              |
|                |                         |                | MXE                   | -      | chr1:173864674-173864704 | chr1:173865228-173865282 | -0.224               | 0              |
|                |                         |                | MXE                   | -      | chr1:173865856-173865894 | chr1:173866527-173866796 | 0.254                | 0              |
|                |                         |                | RI                    | -      | chr1:173864256-173865282 | NA                       | 0.15                 | 0              |
|                |                         |                | MXE                   | -      | chr1:173865470-173865547 | chr1:173865856-173865894 | -0.266               | 0              |
|                |                         |                | RI                    | -      | chr1:173865228-173865547 | NA                       | 0.436                | 0              |
|                |                         |                | MXE                   | -      | chr1:173865509-173865547 | chr1:173865856-173866206 | 0.274                | 0              |
|                |                         |                | MXE                   | -      | chr1:173865856-173865894 | chr1:173866176-173866206 | 0.232                | 0              |
|                |                         |                | MXE                   | -      | chr1:173864483-173864506 | chr1:173865228-173865282 | -0.124               | 6.96E-12       |
|                |                         |                | MXE                   | -      | chr1:173865509-173865547 | chr1:173865856-173865894 | 0.154                | 2.88E-11       |
|                |                         |                | MXE                   | -      | chr1:173864674-173864704 | chr1:173865228-173865282 | 0.206                | 5.01E-11       |
|                |                         |                | RI                    | -      | chr1:173864483-173864704 | NA                       | 0.206                | 4.03E-10       |
|                |                         |                | MXE                   | -      | chr1:173865470-173865547 | chr1:173866176-173866206 | -0.232               | 1.87E-09       |
|                |                         |                | RI                    | -      | chr1:173864256-173864506 | NA                       | 0.171                | 1.09E-08       |
|                |                         |                | MXE                   | -      | chr1:173865856-173865894 | chr1:173866760-173866796 | 0.229                | 1.36E-07       |
|                |                         |                | MXE                   | -      | chr1:173865228-173865282 | chr1:173865470-173865547 | 0.121                | 1.59E-05       |
|                |                         |                | MXE                   | -      | chr1:173865228-173865547 | chr1:173866176-173866206 | -0.198               | 2.31E-05       |
|                |                         |                | MXE                   | -      | chr1:173865509-173865547 | chr1:173866527-173866567 | 0.214                | 6.74E-05       |
|                |                         |                | MXE                   | -      | chr1:173865470-173865547 | chr1:173866527-173866567 | -0.194               | 8.27E-05       |
|                |                         |                | MXE                   | -      | chr1:173865856-173865894 | chr1:173866527-173866567 | 0.25                 | 0.000377180693 |
|                |                         |                | ES                    | -      | chr1:173864674-173864704 | NA                       | -0.223               | 0.000528708466 |
|                |                         |                | MXE                   | -      | chr1:173866760-173866796 | chr1:173866990-173867043 | -0.166               | 0.008854126289 |
| LINC00910      | 4.052061325             | 4.78E-14       | ES                    | -      | chr17:43387935-43388057  | NA                       | 0.294                | 2.51E-05       |
| LINC01001      | 2.271547507             | 0.006862132394 | ES                    | -      | chr11:134563-134796      | NA                       | 0.533                | 0.01082847443  |
| LINC01021      | 1.955564405             | 0.0116975285   | ES                    | +      | chr5:27477638-27477801   | NA                       | -0.121               | 0.03820251916  |
| LINC01778      | -2.722293474            | 0.006404109579 | MXE                   | +      | chr1:30826554-30826652   | chr1:30829747-30829882   | -0.203               | 0.04357236015  |
| MIR99AHG       | -3.934916524            | 1.08E-11       | ES                    | +      | chr21:16537378-16537439  | NA                       | 0.119                | 0.003127023316 |
| NOVA1-AS1      | 2.538877294             | 6.37E-07       | ES                    | +      | chr14:26797913-26798030  | NA                       | -0.122               | 0.01371870462  |
| NR2F1-AS1      | -2.868865851            | 2.32E-06       | ES                    | -      | chr5:93438702-93438741   | NA                       | 0.288                | 0.004687272022 |
| PSMA3-AS1      | -1.50008569             | 1.84E-05       | ES                    | -      | chr14:58293065-58293138  | NA                       | 0.417                | 1.58E-13       |
|                |                         |                | ES                    | -      | chr14:58288717-58288813  | NA                       | -0.432               | 7.31E-06       |
|                |                         |                | ES                    | -      | chr14:58285590-58285756  | NA                       | 0.308                | 1.18E-05       |
|                |                         |                | ES                    | -      | chr14:58293765-58295811  | NA                       | 0.201                | 4.24E-05       |
|                |                         |                | ES                    | -      | chr14:58273978-58274135  | NA                       | 0.237                | 7.74E-05       |

|                |              |                |      |   |                          |                          |        |                |
|----------------|--------------|----------------|------|---|--------------------------|--------------------------|--------|----------------|
|                |              |                | ES   | - | chr14:58285590-58285756  | NA                       | 0.289  | 0.000525528662 |
|                |              |                | MXE  | - | chr14:58273978-58274010  | chr14:58285590-58285756  | 0.377  | 0.001136202548 |
|                |              |                | A3SS | - | chr14:58273978-58274135  | chr14:58273978-58274010  | 0.23   | 0.00508214036  |
|                |              |                | MXE  | - | chr14:58285590-58285756  | chr14:58291634-58291707  | -0.248 | 0.005483540331 |
|                |              |                | ES   | - | chr14:58293313-58293544  | NA                       | 0.102  | 0.005554562012 |
| PVT1           | 1.306446058  | 0.004494224275 | ES   | + | chr8:127983903-127984204 | NA                       | 0.173  | 1.02E-05       |
|                |              |                | ES   | + | chr8:128099369-128099573 | NA                       | 0.182  | 2.16E-05       |
|                |              |                | MXE  | + | chr8:127939507-127939676 | chr8:127983903-127984204 | -0.137 | 0.000100701606 |
|                |              |                | ES   | + | chr8:127983903-127984204 | NA                       | 0.228  | 0.001136224867 |
|                |              |                | ES   | + | chr8:128070159-128070272 | NA                       | -0.138 | 0.003876184563 |
| RBM26-AS1      | -1.372105486 | 0.01108391598  | ES   | + | chr13:79417834-79417916  | NA                       | 0.207  | 0.0179359004   |
| RGMB-AS1       | -2.82462874  | 0.02763328829  | ES   | - | chr5:98771655-98771766   | NA                       | 0.667  | 2.10E-07       |
| RP11-1228E12.1 | 1.830938095  | 0.03593843095  | ES   | - | chr17:71365-71556        | NA                       | 0.667  | 0.001952422279 |
| RP11-156P1.3   | -1.092878188 | 0.03206607327  | ES   | - | chr17:47072471-47072559  | NA                       | 0.494  | 0.000788106904 |
|                |              |                | ES   | - | chr17:47033277-47033381  | NA                       | 0.171  | 0.02472987573  |
| RP4-639F20.1   | 2.662459679  | 8.82E-09       | A3SS | + | chr1:94962924-94963270   | chr1:94962978-94963270   | 0.159  | 0.02193666938  |
| SNHG11         | -1.126572362 | 0.02635014089  | ES   | + | chr20:38447929-38448093  | NA                       | -0.161 | 0.02738999534  |
| SNHG3          | 2.007679738  | 9.72E-05       | ES   | + | chr1:28508127-28508160   | NA                       | 0.173  | 0.0111445589   |
| SNHG6          | 1.619245894  | 1.16E-05       | ES   | - | chr8:66922613-66922725   | NA                       | -0.151 | 0              |
| SNHG8          | 3.401142657  | 2.65E-08       | A5SS | + | chr4:118278708-118279137 | chr4:118278708-118278792 | -0.114 | 0.000990167683 |
| TPT1-AS1       | -2.889017128 | 3.55E-10       | MXE  | + | chr13:45378529-45378671  | chr13:45383090-45383235  | -0.625 | 6.05E-07       |
|                |              |                | MXE  | + | chr13:45379194-45379335  | chr13:45383090-45383235  | -0.547 | 3.37E-06       |
|                |              |                | A3SS | + | chr13:45390713-45390902  | chr13:45390757-45390902  | 0.12   | 1.61E-05       |
|                |              |                | ES   | + | chr13:45390757-45390902  | NA                       | 0.148  | 1.99E-05       |
|                |              |                | ES   | + | chr13:45390713-45390902  | NA                       | 0.109  | 2.67E-05       |
|                |              |                | MXE  | + | chr13:45379194-45379335  | chr13:45383090-45383235  | -0.37  | 3.21E-05       |
|                |              |                | MXE  | + | chr13:45379925-45380001  | chr13:45383090-45383235  | -0.293 | 8.84E-05       |
|                |              |                | MXE  | + | chr13:45379925-45380001  | chr13:45383090-45383235  | -0.308 | 9.27E-05       |
|                |              |                | MXE  | + | chr13:45379194-45380001  | chr13:45383090-45383235  | -0.377 | 0.000188143965 |
|                |              |                | A3SS | + | chr13:45377060-45377215  | chr13:45377139-45377215  | 0.22   | 0.00019763891  |
|                |              |                | MXE  | + | chr13:45379194-45380001  | chr13:45383090-45383235  | -0.397 | 0.000310183700 |
|                |              |                | ES   | + | chr13:45360140-45360239  | NA                       | 0.619  | 0.004168487247 |
|                |              |                | MXE  | + | chr13:45383090-45383235  | chr13:45389734-45389820  | 0.107  | 0.018188216    |
|                |              |                | MXE  | + | chr13:45379898-45380001  | chr13:45383090-45383235  | -0.116 | 0.03030437867  |
| TRAF3IP2-AS1   | -1.702715019 | 3.10E-05       | ES   | + | chr6:111574620-111574658 | NA                       | -0.317 | 0.01210955425  |
| WEE2-AS1       | -1.371126783 | 0.04272802559  | ES   | - | chr7:141714188-141714374 | NA                       | 0.275  | 0.000891391094 |
| ZBED3-AS1      | -1.506734757 | 0.00271888178  | ES   | + | chr5:77100235-77100391   | NA                       | 0.276  | 0.009747054499 |
| ZNF561-AS1     | -2.939397831 | 9.05E-11       | ES   | + | chr19:9627715-9627806    | NA                       | -0.149 | 0.02302160623  |
| ZNF582-AS1     | -7.903489168 | 9.86E-09       | RI   | + | chr19:56398276-56399168  | NA                       | 0.809  | 0              |

**Supplementary Table 26:** List of primers used for validation of splicing events by qRT-PCR.

| gene   | exon         | Primer Forward (5' - 3')   | Primer Reverse (5' - 3') |
|--------|--------------|----------------------------|--------------------------|
| OSBPL6 | constitutive | ATGTGGGACTCTCAGTCAT        | CTTCGGTGTCAAGGTCTATTC    |
|        | alternative  | GCTAACTGTGTAGATATTTCAAAGAA | TTTGTATCTTTGCTGACACTTT   |
| RAB18  | constitutive | GCTGGTCAAGAGAGGTTTAG       | ACCCTGTGCACCTCTATAA      |
|        | alternative  | TTACTTTGCATCAGCAGACT       | CCACTTCAGGATTGGACTATTT   |
| ELMOD3 | constitutive | CAAGGAAGGCAAAGGTAGAG       | CTATGTGGAGAGCCAGAGAT     |
|        | alternative  | GAAAGCTGGTCACGATTCT        | ACAGGCGGGTATGGTAATA      |
| WASF3  | constitutive | ACTACTGATAACTGAGCCAAAG     | CATGTAATCGTTGACTATGGGT   |
|        | alternative  | GCTGAACCCTAACAGAAACC       | CCTTCTCTCCCACTCTTCTT     |
| SLC9A5 | constitutive | GGGAGCAGTTTGACAAGAA        | CCTGTAGTACACATCCCAGA     |
|        | alternative  | GGATAGAGCTGAGGACAGA        | CATGTCAGTCTGGAGGAAAG     |
| GSN    | constitutive | CTCTCTTTGTCCAGTGCTTC       | TGTGCAGGGTGAAGAGT        |
|        | alternative  | CAGATACAGCGCTAGGAAA        | TCCATTCTAGACCTGAATTACTC  |
| FDFT1  | constitutive | CAGAACGTGCCAACTCTATG       | TTCTCCTTGCTGGTCTT        |
|        | alternative  | GTCCTGGCTGACCTGT           | AACCACCGGGAACCA          |
| B2M    | endogenous   | TGCCGTGTGAACCATGTGA        | GCTTACATGTCTCGATCCCACT   |

## Supplementary References

- 1) Lawrence, Michael S., Petar Stojanov, Craig H. Mermel, James T. Robinson, Levi A. Garraway, Todd R. Golub, Matthew Meyerson, Stacey B. Gabriel, Eric S. Lander, and Gad Getz. 2014. "Discovery and Saturation Analysis of Cancer Genes across 21 Tumour Types." *Nature* 505 (7484): 495–501.
- 2) Vogelstein, Bert, Nickolas Papadopoulos, Victor E. Velculescu, Shibin Zhou, Luis A. Diaz Jr, and Kenneth W. Kinzler. 2013. "Cancer Genome Landscapes." *Science* 339 (6127): 1546–58.
- 3) Tamborero, David, Abel Gonzalez-Perez, Christian Perez-Llamas, Jordi Deu-Pons, Cyriac Kandoth, Jüri Reimand, Michael S. Lawrence, et al. 2013. "Comprehensive Identification of Mutational Cancer Driver Genes across 12 Tumor Types." *Scientific Reports* 3 (October): 2650.
